# Supplementary material for: Characterization of the Cannabis sativa glandular trichome epigenome
Source: bioRxiv preprint, doi:10.1101/2024.07.04.602151, version 1 (2024-07-08)
Supplement: Additional File 2 [file 602151_file03.xlsx]

## Sheet: Read_me
This document contains the annotated chromatin peaks for H3K4me3, H3K56ac, H3K27me3, and H2A.Z for glanduar trichomes. These histone modification ChIP-seq peaks were annotated using HOMER annotatePeaks.pl script and provide structural genomic context to the peaks used in this study.

## Sheet: Trichome_annotate_H2AZ
p-value	Chr	Start	End	Strand	Peak Score	Focus Ratio/Region Size	Annotation	Detailed Annotation	Distance to TSS	Nearest PromoterID	Entrez ID	Nearest Unigene	Nearest Gene Description	Gene Type	trichome/leaf_DESeq2_log2FoldChange	trichome/leaf_DESeq2_pvalue	trichome_leaf_DESeq2_padj	trichome/stem_DESeq2_log2FoldChange	trichome/stem_DESeq2_pvalue	trichome/stem_DESeq2_padj
5.925492230853282e-228	NC_044371.1	20041401	20042599	+	923.997	1198	Intergenic	Intergenic	9480	LOC115705441	LOC115705441	XM_030632777	CDP-diacylglycerol--glycerol-3-phosphate 3-phosphatidyltransferase 2	protein_coding	-1.055394111	0.682193645	1	-0.150963129	1	1
4.718245850899759e-57	NC_044377.1	42065201	42066599	+	306.605	1398	Intergenic	Intergenic	-69459	LOC115695196	LOC115695196	XM_030622282	uncharacterized LOC115695196	protein_coding	NA	NA	NA	NA	NA	NA
2.95550276056963e-11	NC_044372.1	26964401	26965999	+	105.155	1598	Intergenic	Intergenic	102283	LOC115711859	LOC115711859	XR_004010726	small nucleolar RNA R71	snoRNA	NA	NA	NA	NA	NA	NA
2.968944037341577e-08	NC_044378.1	58373601	58374799	+	99.6927	1198	Intergenic	Intergenic	4320	LOC115698380	LOC115698380	XR_004008131	small nucleolar RNA R71	snoRNA	NA	NA	NA	NA	NA	NA
4.948368488919971e-08	NC_044375.1	58260401	58261999	+	91.2687	1598	Intergenic	Intergenic	-58379	LOC115720220	LOC115720220	XM_030649377	uncharacterized LOC115720220	protein_coding	NA	NA	NA	NA	NA	NA
1.1010950681440564e-06	NC_044377.1	5078201	5078999	+	90.3316	798	exon	-exon (LOC115694896, exon 3 of 6)	585	LOC115694896	LOC115694896	XM_030622000	uncharacterized LOC115694896	protein_coding	NA	NA	NA	NA	NA	NA
9.365158997339781e-07	NC_044378.1	25397801	25398599	+	89.5998	798	Intergenic	Intergenic	30435	LOC115696451	LOC115696451	XM_030623352	uncharacterized mitochondrial protein AtMg00810-like	protein_coding	NA	NA	NA	NA	NA	NA
2.7407232178314068e-05	NC_044378.1	27317001	27317599	+	89.2509	598	Intergenic	Intergenic	18567	LOC115696461	LOC115696461	XM_030623363	uncharacterized LOC115696461	protein_coding	NA	NA	NA	NA	NA	NA
7.95034221487045e-07	NC_044374.1	77322201	77323599	+	88.9126	1398	Intergenic	Intergenic	227142	LOC115718006	LOC115718006	XM_030646974	uncharacterized LOC115718006	protein_coding	0.410947537	1	NA	0.998328082	1	NA
7.69401192664693e-09	NC_044377.1	47111801	47113799	+	88.7708	1998	Intergenic	Intergenic	-55037	LOC115695223	LOC115695223	XM_030622304	uncharacterized LOC115695223	protein_coding	NA	NA	NA	NA	NA	NA
6.737746995173647e-07	NC_044372.1	56791801	56792999	+	88.2661	1198	Intergenic	Intergenic	20019	LOC115710003	LOC115710003	XM_030638291	uncharacterized LOC115710003	protein_coding	1.510929649	0.094064364	0.503058158	1.44349239	0.145060636	0.791606252
4.030130196731253e-06	NC_044372.1	34586801	34587599	+	85.9594	798	Intergenic	Intergenic	7539	LOC115709432	LOC115709432	XM_030637542	AP-3 complex subunit delta	protein_coding	0.01906555	1	1	-0.09400722	1	1
2.646469269753849e-07	NC_044378.1	24588401	24589399	+	85.2981	998	Intergenic	Intergenic	-3116	LOC115697509	LOC115697509	XM_030624540	transcription factor VOZ1,	protein_coding	-0.087151472	1	1	-0.390957318	1	1
5.84529778409461e-07	NC_044377.1	39975401	39976599	+	84.0042	1198	Intergenic	Intergenic	-8498	LOC115695174	LOC115695174	XM_030622264	transcription factor bHLH160	protein_coding	-3.981284089	0.027302444	0.186332269	-3.855025107	0.033700461	0.236131667
2.0037569244942833e-06	NC_044372.1	36138801	36139999	+	83.7573	1198	Intergenic	Intergenic	-51302	LOC115709904	LOC115709904	XM_030638158	phosphatidylinositol 4-phosphate 5-kinase 9,	protein_coding	0.246208837	1	1	0.616888555	1	1
1.6197395993865173e-10	NC_044372.1	17322001	17324399	+	83.4861	2398	Intergenic	Intergenic	51431	LOC115708734	LOC115708734	XM_030636736	transcription factor MYB122	protein_coding	2.087672957	0.114286824	0.587573044	1.576743707	0.397032532	1
2.3953468711207432e-05	NC_044372.1	70454401	70454999	+	83.0581	598	Intergenic	Intergenic	-11399	LOC115711477	LOC115711477	XM_030639817	PAN domain-containing protein At5g03700	protein_coding	0.26569044	1	1	-0.288799046	1	1
1.2846212666460083e-06	NC_044377.1	68097801	68098999	+	82.6236	1198	Intergenic	Intergenic	-14328	LOC115725126	LOC115725126	XM_030654556	serine/arginine-rich splicing factor SC35,	protein_coding	0.049535626	1	1	0.268713632	1	1
3.6850664083397765e-06	NC_044373.1	9069001	9070399	+	81.7674	1398	Intergenic	Intergenic	112792	LOC115712135	LOC115712135	XM_030640378	calmodulin-7	protein_coding	0.828619184	1	1	-0.409051784	1	1
7.491214370217025e-07	NC_044377.1	22381001	22381999	+	81.4506	998	Intergenic	Intergenic	-11317	LOC115695972	LOC115695972	XM_030623086	pentatricopeptide repeat-containing protein At1g74630	protein_coding	-0.504848936	1	1	0.545545446	1	1
3.0746159844457855e-06	NC_044373.1	65124001	65124999	+	81.3481	998	Intergenic	Intergenic	-141738	LOC115712908	LOC115712908	XM_030641328	paired amphipathic helix protein Sin3-like 4,	protein_coding	-0.413984177	1	1	-0.157271262	1	1
5.8199704740519397e-05	NC_044379.1	23719801	23720399	+	81.3074	598	Intergenic	Intergenic	-57812	LOC115698895	LOC115698895	XM_030626097	protein FAR1-RELATED SEQUENCE 5-like	protein_coding	5.34767208	0.050019573	0.305537418	5.935062273	0.026108919	0.190058995
8.543617274069235e-09	NC_044374.1	43717001	43719199	+	81.2561	2198	Intergenic	Intergenic	-7991	LOC115716271	LOC115716271	XM_030645032	beta-adaptin-like protein B	protein_coding	-0.358124412	1	1	-0.485801849	1	1
5.445375551722295e-09	NC_044374.1	7212601	7213799	+	80.6438	1198	Intergenic	Intergenic	-18166	LOC115715590	LOC115715590	XM_030644231	probable 28S rRNA (cytosine-C(5))-methyltransferase	protein_coding	-0.218173857	1	1	-1.185349497	0.350274631	1
9.663962056132545e-06	NC_044375.1	39868401	39868999	+	80.5468	598	Intergenic	Intergenic	7566	TRNAC-GCA_4	TRNAC-GCA_4	TRNAC-GCA_4	#N/A	tRNA	NA	NA	NA	NA	NA	NA
9.750038560156309e-08	NC_044377.1	26588001	26589999	+	80.4766	1998	Intergenic	Intergenic	-32024	LOC115696101	LOC115696101	XR_004007699	small nucleolar RNA R71	snoRNA	NA	NA	NA	NA	NA	NA
8.129630093495366e-08	NC_044376.1	22744801	22746399	+	80.2028	1598	Intergenic	Intergenic	-13525	LOC115723338	LOC115723338	XM_030652781	E3 ubiquitin-protein ligase RMA1H1	protein_coding	0.067728221	1	1	-0.794166733	1	1
8.042563618977316e-06	NC_044370.1	98345001	98345999	+	80.1361	998	Intergenic	Intergenic	-9776	LOC115703461	LOC115703461	XR_004009223	small nucleolar RNA R71	snoRNA	NA	NA	NA	NA	NA	NA
7.422409902118677e-08	NC_044372.1	48129601	48130799	+	80.0701	1198	Intergenic	Intergenic	-50468	LOC115711879	LOC115711879	XR_004010747	small nucleolar RNA R71	snoRNA	NA	NA	NA	NA	NA	NA
3.671868985309696e-05	NW_022060513.1	11401	12199	+	80.0177	798	NA	NA	NA	NA			#N/A		NA	NA	NA	NA	NA	NA
6.099966809519556e-06	NC_044378.1	50644801	50645999	+	79.5647	1198	Intergenic	Intergenic	24408	LOC115698407	LOC115698407	XR_004008155	small nucleolar RNA R71	snoRNA	NA	NA	NA	NA	NA	NA
2.0080168520076067e-09	NC_044378.1	23138201	23139799	+	79.4662	1598	Intergenic	Intergenic	71665	LOC115696950	LOC115696950	XR_004007841	uncharacterized LOC115696950	lncRNA	NA	NA	NA	NA	NA	NA
5.561647279746171e-06	NC_044379.1	34717601	34718599	+	79.3852	998	Intergenic	Intergenic	19297	LOC115700044	LOC115700044	XM_030627596	uncharacterized LOC115700044	protein_coding	0.410947537	1	NA	0.998328082	1	NA
4.621878971639219e-06	NC_044374.1	60072601	60073599	+	79.0411	998	Intergenic	Intergenic	-383055	LOC115717877	LOC115717877	XM_030646848	uncharacterized LOC115717877	protein_coding	NA	NA	NA	NA	NA	NA
4.212718282482253e-06	NC_044373.1	58084401	58085199	+	78.8761	798	Intergenic	Intergenic	-42509	LOC115713527	LOC115713527	XM_030642007	serine/threonine-protein kinase ATG1t	protein_coding	-0.029424865	1	1	-0.231514132	1	1
2.1018856489831495e-05	NC_044377.1	2493401	2494199	+	78.7473	798	promoter-TSS	-promoter-TSS (LOC115695994)	89	LOC115695994	LOC115695994	XR_004007598	small nucleolar RNA R71	snoRNA	NA	NA	NA	NA	NA	NA
2.411354101933414e-06	NC_044370.1	102155201	102156599	+	77.9741	1398	Intergenic	Intergenic	9082	LOC115700865	LOC115700865	XM_030628532	probable DNA-3-methyladenine glycosylase 2,	protein_coding	0.217269081	1	1	-0.257276414	1	1
7.289733494837046e-05	NC_044373.1	56238201	56238799	+	77.7032	598	Intergenic	Intergenic	-109582	LOC115715355	LOC115715355	XR_004011231	small nucleolar RNA R71	snoRNA	NA	NA	NA	NA	NA	NA
1.8226165966989728e-06	NC_044378.1	21345201	21345999	+	77.5727	798	Intergenic	Intergenic	-21300	LOC115696927	LOC115696927	XM_030623823	UDP-glycosyltransferase 43	protein_coding	0.811224334	1	1	-1.805762908	0.187699411	0.969854361
4.353909250187016e-08	NC_044374.1	48853201	48854399	+	77.414	1198	Intergenic	Intergenic	2553	LOC115715929	LOC115715929	XR_004011482	uncharacterized LOC115715929	lncRNA	NA	NA	NA	NA	NA	NA
6.031940368296022e-05	NC_044378.1	53791201	53792199	+	77.321	998	Intergenic	Intergenic	-114650	LOC115698394	LOC115698394	XR_004008143	small nucleolar RNA R71	snoRNA	NA	NA	NA	NA	NA	NA
1.932340663946005e-07	NW_022060416.1	75601	76999	+	77.0643	1398	Intergenic	Intergenic	77609	LOC115702059	LOC115702059	XR_004008788	#N/A	snoRNA	NA	NA	NA	NA	NA	NA
4.9896201840686984e-05	NC_044375.1	74180601	74181399	+	76.9652	798	Intergenic	Intergenic	17102	LOC115719629	LOC115719629	XM_030648738	E3 ubiquitin-protein ligase RDUF2	protein_coding	0.199411676	1	1	-0.016415213	1	1
1.141825753618386e-06	NC_044374.1	3573001	3573999	+	76.9652	998	Intergenic	Intergenic	-3710	LOC115718327	LOC115718327	XR_004011906	small nucleolar RNA R71	snoRNA	NA	NA	NA	NA	NA	NA
3.5205632686601025e-06	NC_044374.1	44495201	44496799	+	75.9754	1598	intron	-intron (LOC115717182, intron 2 of 4)	10524	LOC115717182	LOC115717182	XM_030646139	phosphoglycerate mutase-like protein AT74H	protein_coding	-1.567581105	0.063930238	0.371839928	0.992801969	1	1
3.203000837371787e-06	NC_044377.1	68908001	68909399	+	75.8653	1398	Intergenic	Intergenic	-11428	LOC115724485	LOC115724485	XM_030653777	probable nitronate monooxygenase	protein_coding	-0.015705819	1	1	1.903590916	0.083282078	0.499285719
2.3309122693825047e-05	NC_044370.1	49858801	49859599	+	75.7579	798	Intergenic	Intergenic	11825	LOC115721323	LOC115721323	XM_030650597	uncharacterized LOC115721323	protein_coding	0.42574027	1	1	-2.27200243	0.647354272	1
3.066449660313077e-07	NC_044378.1	70175801	70178199	+	75.5846	2398	Intergenic	Intergenic	7222	LOC115696848	LOC115696848	XM_030623733	2-alkenal reductase (NADP(+)-dependent)	protein_coding	NA	NA	NA	NA	NA	NA
2.4116551550706372e-06	NC_044372.1	32606601	32607999	+	75.5508	1398	Intergenic	Intergenic	39530	LOC115710624	LOC115710624	XM_030638982	uncharacterized LOC115710624	protein_coding	NA	NA	NA	NA	NA	NA
2.1938735977192984e-06	NC_044375.1	39147801	39149399	+	75.4509	1598	promoter-TSS	-promoter-TSS (LOC115721467)	-227	LOC115721467	LOC115721467	XR_004012489	small nucleolar RNA R71	snoRNA	NA	NA	NA	NA	NA	NA
0.00015743327714407793	NC_044371.1	24132601	24133199	+	75.4181	598	Intergenic	Intergenic	-33398	LOC115703649	LOC115703649	XM_030630888	protein INVOLVED IN DE NOVO 2	protein_coding	0.316263255	1	1	-0.187210691	1	1
2.9760809838975827e-08	NC_044378.1	58602001	58604199	+	75.3948	2198	Intergenic	Intergenic	-20605	LOC115697074	LOC115697074	XM_030623984	uncharacterized LOC115697074	protein_coding	0.639292529	1	1	-0.555916641	1	1
2.3119439783699522e-07	NC_044370.1	59955201	59956599	+	75.3372	1398	Intergenic	Intergenic	26064	LOC115713111	LOC115713111	XM_030641600	nitrate reductase [NADH]	protein_coding	-2.952700227	0.001921039	0.020190342	-0.133174053	1	1
1.815407032157139e-06	NC_044375.1	65739601	65740999	+	75.2579	1398	Intergenic	Intergenic	50500	LOC115718535	LOC115718535	XM_030647336	transcription factor MYB46	protein_coding	4.109593336	0.000262215	0.003673873	1.515083866	0.315666823	1
1.5916746904779976e-05	NC_044373.1	66263801	66264799	+	75.2579	998	Intergenic	Intergenic	-37757	LOC115713586	LOC115713586	XM_030642074	uncharacterized LOC115713586	protein_coding	NA	NA	NA	NA	NA	NA
1.6513581432734759e-06	NC_044375.1	32911001	32912399	+	75.1646	1398	Intergenic	Intergenic	-8785	LOC115719433	LOC115719433	XM_030648484	sodium/hydrogen exchanger 2	protein_coding	-0.772828946	1	1	0.01948834	1	1
0.00012979467986116798	NW_022060417.1	34001	34799	+	75.1036	798	Intergenic	Intergenic	-48836	LOC115702063	LOC115702063	XM_030629513	#N/A	protein_coding	NA	NA	NA	NA	NA	NA
1.366314737686894e-06	NC_044374.1	53227601	53228599	+	74.9844	998	Intergenic	Intergenic	-85807	LOC115717845	LOC115717845	XM_030646816	uncharacterized LOC115717845	protein_coding	NA	NA	NA	NA	NA	NA
1.1953354289844878e-05	NC_044378.1	43271201	43272199	+	74.9188	998	TTS	-TTS (LOC115698427)	221	LOC115698427	LOC115698427	XR_004008174	small nucleolar RNA R71	snoRNA	NA	NA	NA	NA	NA	NA
1.0864724145608076e-05	NC_044371.1	43645201	43646599	+	74.8119	1398	Intergenic	Intergenic	-87538	LOC115708324	LOC115708324	XM_030636565	ATP synthase subunit alpha, chloroplastic	protein_coding	-0.715525804	1	1	0.815220211	1	1
1.0877618971046813e-07	NC_044377.1	56514801	56516399	+	74.7422	1598	Intergenic	Intergenic	78519	LOC115724891	LOC115724891	XM_030654257	sodium transporter HKT1	protein_coding	-2.440176533	0.001006879	0.011744679	-0.195394445	1	1
1.0597174810628543e-08	NC_044372.1	76895201	76897399	+	74.6932	2198	Intergenic	Intergenic	65097	LOC115708818	LOC115708818	XM_030636835	protein cornichon homolog 1-like	protein_coding	-0.585983017	1	1	-0.50607302	1	1
9.646833027379333e-09	NC_044374.1	55679401	55681399	+	74.6352	1998	Intergenic	Intergenic	49138	LOC115717861	LOC115717861	XM_030646831	uncharacterized LOC115717861	protein_coding	NA	NA	NA	NA	NA	NA
8.975460360205785e-06	NC_044371.1	4012801	4014199	+	74.6065	1398	Intergenic	Intergenic	-14092	LOC115707015	LOC115707015	XM_030634810	uncharacterized LOC115707015	protein_coding	0.241627881	1	1	-1.063313714	0.956665315	1
8.157690068452096e-06	NC_044377.1	62774601	62775399	+	74.5079	798	Intergenic	Intergenic	16216	LOC115724483	LOC115724483	XM_030653774	uncharacterized protein At1g10890,	protein_coding	0.463773004	1	1	0.037447676	1	1
8.007664858347985e-05	NC_044370.1	76180601	76181599	+	74.4117	998	Intergenic	Intergenic	-57677	LOC115703333	LOC115703333	XR_004009106	small nucleolar RNA R71	snoRNA	NA	NA	NA	NA	NA	NA
8.007664858347985e-05-2	NC_044374.1	60300001	60300599	+	74.4117	598	Intergenic	Intergenic	-155855	LOC115717877	LOC115717877	XM_030646848	uncharacterized LOC115717877	protein_coding	NA	NA	NA	NA	NA	NA
8.007664858347985e-05-3	NC_044374.1	77428801	77429399	+	74.4117	598	Intergenic	Intergenic	120942	LOC115718006	LOC115718006	XM_030646974	uncharacterized LOC115718006	protein_coding	0.410947537	1	NA	0.998328082	1	NA
7.414345144686463e-06	NC_044372.1	55946801	55947799	+	74.4117	998	Intergenic	Intergenic	-70763	LOC115711567	LOC115711567	XR_004010550	uncharacterized LOC115711567	lncRNA	NA	NA	NA	NA	NA	NA
5.6195897113403517e-08	NC_044378.1	23626001	23627399	+	74.2873	1398	intron	-intron (LOC115696441, intron 1 of 1)	172	LOC115696441	LOC115696441	XM_030623342	uncharacterized LOC115696441	protein_coding	NA	NA	NA	NA	NA	NA
6.600440847813744e-05	NC_044374.1	48001601	48002399	+	74.167	798	Intergenic	Intergenic	16514	LOC115716679	LOC115716679	XM_030645531	#N/A	protein_coding	-0.76241376	1	1	-0.647165865	1	1
5.992440551768985e-05-2	NC_044374.1	11666401	11667199	+	74.0506	798	Intergenic	Intergenic	52303	LOC115717450	LOC115717450	XR_004011756	uncharacterized LOC115717450,	lncRNA	-0.064047069	1	1	0.218469901	1	1
5.992440551768985e-05	NC_044370.1	63452001	63452799	+	74.0506	798	Intergenic	Intergenic	560874	LOC115702520	LOC115702520	XM_030629950	nuclear speckle RNA-binding protein B-like	protein_coding	1.019432706	0.99496263	NA	-0.910668564	1	1
5.058914507824731e-06	NC_044374.1	8068401	8069199	+	74.0506	798	Intergenic	Intergenic	12755	LOC115717000	LOC115717000	XM_030645923	glutaminyl-peptide cyclotransferase,	protein_coding	0.144451893	1	1	0.004658526	1	1
5.992440551768985e-05-3	NC_044378.1	51438401	51439399	+	74.0506	998	Intergenic	Intergenic	-2914	LOC115696636	LOC115696636	XM_030623529	nucleoside-triphosphatase THEP1-like	protein_coding	0.063001301	1	1	0.021314449	1	1
4.5977613877711134e-06-2	NC_044375.1	84640401	84641599	+	73.9657	1198	Intergenic	Intergenic	18445	LOC115720432	LOC115720432	XM_030649582	transcription factor MYB64-like	protein_coding	NA	NA	NA	NA	NA	NA
4.5977613877711134e-06	NC_044373.1	45788401	45789799	+	73.9657	1398	Intergenic	Intergenic	-49322	TRNAL-AAG_4	TRNAL-AAG_4	TRNAL-AAG_4	#N/A	tRNA	NA	NA	NA	NA	NA	NA
5.440437678220158e-05	NC_044375.1	92822601	92823599	+	73.9379	998	Intergenic	Intergenic	-4424	LOC115720679	LOC115720679	XM_030649847	uncharacterized LOC115720679	protein_coding	NA	NA	NA	NA	NA	NA
3.621314951137733e-07	NC_044371.1	89754401	89755799	+	73.9158	1398	Intergenic	Intergenic	14077	LOC115707069	LOC115707069	XM_030634899	transcription initiation factor TFIID subunit 12b	protein_coding	0.010522146	1	1	-0.090422479	1	1
4.939284249052561e-05	NC_044374.1	32876001	32877399	+	73.8288	1398	Intergenic	Intergenic	14127	LOC115717418	LOC115717418	XM_030646390	costars family protein	protein_coding	-0.042745827	1	1	-0.373258763	1	1
4.939284249052561e-05-2	NC_044375.1	40006401	40007599	+	73.8288	1198	Intergenic	Intergenic	27714	LOC115721364	LOC115721364	XM_030650649	uncharacterized LOC115721364	protein_coding	3.068332828	0.20121191	0.903714147	-4.816626286	0.00059937	0.00689609
4.071245745654604e-05	NC_044378.1	43538401	43539199	+	73.6206	798	Intergenic	Intergenic	-18867	LOC115697972	LOC115697972	XM_030625148	uncharacterized LOC115697972	protein_coding	0.096308711	1	1	-0.171719464	1	1
2.048869337408862e-07	NC_044377.1	59016201	59017799	+	73.5408	1598	intron	-intron (LOC115695307, intron 1 of 2)	2103	LOC115695307	LOC115695307	XM_030622382	zinc finger MYM-type protein 1-like	protein_coding	NA	NA	NA	NA	NA	NA
3.355818582136357e-05-2	NW_022060393.1	25601	26399	+	73.4247	798	NA	NA	NA	NA			#N/A		NA	NA	NA	NA	NA	NA
3.355818582136357e-05	NC_044370.1	15272601	15273399	+	73.4247	798	Intergenic	Intergenic	3157	LOC115717224	LOC115717224	XM_030646200	uncharacterized protein Mb2253c-like	protein_coding	NA	NA	NA	NA	NA	NA
1.128242832044234e-08	NC_044370.1	43082201	43084399	+	73.3775	2198	promoter-TSS	-promoter-TSS (LOC115703274)	330	LOC115720508	LOC115720508	XM_030649657	uncharacterized LOC115720508	protein_coding	1.399014458	0.921130582	NA	1.024622113	0.995125176	NA
1.5410544454030354e-07	NC_044374.1	72550801	72551999	+	73.3682	1198	Intergenic	Intergenic	-176803	LOC115717969	LOC115717969	XM_030646937	uncharacterized LOC115717969	protein_coding	NA	NA	NA	NA	NA	NA
3.046760294278861e-05	NC_044373.1	64251601	64252599	+	73.331	998	Intergenic	Intergenic	36243	LOC115712654	LOC115712654	XM_030640962	FT-interacting protein 1	protein_coding	5.13922456	0.003130994	0.030474482	1.398863199	0.626592636	1
2.511473315712174e-05	NC_044377.1	4503401	4504799	+	73.1517	1398	Intergenic	Intergenic	-8406	LOC115725579	LOC115725579	XM_030655149	cyclic nucleotide-gated ion channel 17	protein_coding	1.225006642	0.323911873	1	0.160457465	1	1
4.819824180958827e-09	NC_044370.1	80595801	80597999	+	72.9823	2198	Intergenic	Intergenic	21328	LOC115720758	LOC115720758	XM_030649936	uncharacterized LOC115720758,	protein_coding	0.264868029	1	1	0.44345708	1	1
0.00033674611529185453	NC_044374.1	75504001	75504599	+	72.901	598	Intergenic	Intergenic	-3176	LOC115717999	LOC115717999	XM_030646968	isoflavone reductase homolog	protein_coding	2.917153385	0.000149186	0.002221374	0.870385168	1	1
1.706717720545568e-05	NC_044376.1	45486401	45487199	+	72.8219	798	Intergenic	Intergenic	-18393	LOC115722987	LOC115722987	XM_030652381	heavy metal-associated isoprenylated plant protein 21	protein_coding	0	1	NA	-3.118839506	0.592716704	NA
0.00027664112697679897	NC_044371.1	46601801	46602399	+	72.67	598	Intergenic	Intergenic	6766	LOC115703645	LOC115703645	XM_030630884	LRR receptor-like serine/threonine-protein kinase HSL2,	protein_coding	-0.491350706	1	1	0.614559892	1	1
0.0002507523640183619	NC_044370.1	31107401	31107999	+	72.5612	598	Intergenic	Intergenic	15796	LOC115697066	LOC115697066	XR_004007872	uncharacterized LOC115697066	lncRNA	NA	NA	NA	NA	NA	NA
5.614568139131242e-07	NC_044372.1	63836601	63838199	+	72.5083	1598	Intergenic	Intergenic	-25097	LOC115710251	LOC115710251	XM_030638606	replication protein A 70 kDa DNA-binding subunit B	protein_coding	3.13425846	0.042087105	0.267186397	-1.638332345	0.519567573	1
5.614568139131242e-07-2	NC_044378.1	49595001	49597399	+	72.5083	2398	Intergenic	Intergenic	-6125	LOC115698135	LOC115698135	XM_030625310	thioredoxin H-type	protein_coding	-1.728159267	0.015637019	0.11709794	-1.302899065	0.314610566	1
0.00022729405915795694-2	NW_022060526.1	5401	6399	+	72.4564	998	NA	NA	NA	NA			#N/A		NA	NA	NA	NA	NA	NA
0.00022729405915795694	NW_022060454.1	1301201	1301799	+	72.4564	598	Intergenic	Intergenic	-200692	LOC115702125	LOC115702125	XM_030629583	#N/A	protein_coding	2.642988593	0.003486277	0.033308503	3.285318001	4.97E-05	0.000699547
9.564765435121279e-06	NC_044375.1	80317601	80318399	+	72.3888	798	Intergenic	Intergenic	81655	LOC115718547	LOC115718547	XM_030647347	telomere repeat-binding protein 5,	protein_coding	0.040080582	1	1	0.22062724	1	1
0.00020603749325108907	NC_044374.1	30061201	30061799	+	72.3556	598	Intergenic	Intergenic	-11901	LOC115717689	LOC115717689	XM_030646671	uncharacterized LOC115717689	protein_coding	NA	NA	NA	NA	NA	NA
8.6852275100479e-06-2	NC_044378.1	47415401	47416399	+	72.3228	998	Intergenic	Intergenic	49723	LOC115696613	LOC115696613	XM_030623507	uncharacterized LOC115696613	protein_coding	NA	NA	NA	NA	NA	NA
8.6852275100479e-06	NC_044374.1	53144401	53145399	+	72.3228	998	Intergenic	Intergenic	-28805	LOC115715990	LOC115715990	XM_030644677	eukaryotic translation initiation factor 2D,	protein_coding	-0.481413754	1	1	-0.159332061	1	1
6.503410230198984e-06	NC_044378.1	22578001	22578799	+	72.1342	798	Intergenic	Intergenic	-12175	LOC115696430	LOC115696430	XM_030623332	uncharacterized LOC115696430	protein_coding	NA	NA	NA	NA	NA	NA
0.00015350208092977983	NC_044374.1	13269401	13269999	+	72.0743	598	Intergenic	Intergenic	11274	LOC115715652	LOC115715652	XR_004011407	uncharacterized LOC115715652	lncRNA	3.912087532	0.354051625	NA	4.499462059	0.265407557	1
8.931926238060535e-09	NC_044377.1	25599601	25601599	+	72.039	1998	Intergenic	Intergenic	77331	LOC115696115	LOC115696115	XR_004007710	small nucleolar RNA R71	snoRNA	NA	NA	NA	NA	NA	NA
0.00012617482483400828	NC_044375.1	15466801	15467399	+	71.9026	598	Intergenic	Intergenic	37130	LOC115721118	LOC115721118	XM_030650363	uncharacterized LOC115721118,	protein_coding	2.311643441	0.503921841	1	-0.545899273	1	1
0.00012617482483400828-2	NC_044377.1	60106401	60107199	+	71.9026	798	Intergenic	Intergenic	-12611	LOC115695963	LOC115695963	XM_030623072	COP9 signalosome complex subunit 8	protein_coding	-0.205667626	1	1	-0.761847554	1	1
4.4229900639312415e-06	NC_044375.1	82893201	82894199	+	71.9026	998	Intergenic	Intergenic	-15572	LOC115719611	LOC115719611	XM_030648712	zinc transporter 6, chloroplastic,	protein_coding	2.197044233	0.000359412	0.004845003	0.409539171	1	1
4.016770481085507e-06	NC_044371.1	63001001	63001999	+	71.848	998	Intergenic	Intergenic	21161	LOC115704206	LOC115704206	XM_030631423	putative disease resistance RPP13-like protein 1	protein_coding	5.066236407	0.030759136	0.20587844	2.31701248	0.407787291	1
1.3404902987511337e-07	NW_022060353.1	7201	7999	+	71.8211	798	NA	NA	NA	NA			#N/A		NA	NA	NA	NA	NA	NA
1.1075906804889679e-07	NC_044372.1	8768401	8770399	+	71.7422	1998	Intergenic	Intergenic	-7578	LOC115710308	LOC115710308	XM_030638676	beta carbonic anhydrase 4	protein_coding	5.672585875	0.001774497	0.018929605	-2.482726198	0.109065792	0.625599345
7.562282047599246e-08	NC_044373.1	49432201	49433599	+	71.592	1398	Intergenic	Intergenic	-63575	LOC115715108	LOC115715108	XM_030643918	NDR1/HIN1-like protein 13	protein_coding	2.553824731	0.097470535	0.518162639	1.719989039	0.418439101	1
2.2541957431438807e-06-2	NC_044379.1	11043201	11044999	+	71.544	1798	Intergenic	Intergenic	7624	LOC115699709	LOC115699709	XM_030627238	COP9 signalosome complex subunit 2	protein_coding	-0.466665207	1	1	-0.432546066	1	1
2.2541957431438807e-06	NC_044378.1	18837801	18839199	+	71.544	1398	Intergenic	Intergenic	-29355	LOC115697794	LOC115697794	XM_030624920	probable LRR receptor-like serine/threonine-protein kinase At1g29720,	protein_coding	-3.113650255	NA	NA	-6.22828013	NA	NA
7.73397499273197e-05	NC_044379.1	18988001	18988999	+	71.5204	998	Intergenic	Intergenic	197357	LOC115699590	LOC115699590	XM_030627078	uncharacterized LOC115699590	protein_coding	0.166417741	1	1	0.248434862	1	1
2.0473978506686517e-06	NC_044378.1	23622601	23623599	+	71.4971	998	Intergenic	Intergenic	3772	LOC115696441	LOC115696441	XM_030623342	uncharacterized LOC115696441	protein_coding	NA	NA	NA	NA	NA	NA
7.01354322475699e-05	NC_044371.1	48848001	48848799	+	71.4511	798	Intergenic	Intergenic	30376	LOC115707266	LOC115707266	XM_030635176	pectinesterase inhibitor 3	protein_coding	1.126086259	0.86458986	1	-0.281861927	1	1
4.694351518583376e-08	NW_022060514.1	39001	40399	+	71.4172	1398	NA	NA	NA	NA			#N/A		NA	NA	NA	NA	NA	NA
6.3604570633169e-05-2	NC_044372.1	36461401	36462199	+	71.3838	798	Intergenic	Intergenic	27061	LOC115710657	LOC115710657	XM_030639014	uncharacterized LOC115710657	protein_coding	NA	NA	NA	NA	NA	NA
6.3604570633169e-05	NC_044372.1	6099601	6100999	+	71.3838	1398	Intergenic	Intergenic	6661	LOC115710362	LOC115710362	XM_030638732	F-box/kelch-repeat protein At3g06240-like	protein_coding	-3.396264103	0.171921892	0.803709759	-4.870919008	0.018028924	0.138640589
5.7683981595528516e-05	NC_044370.1	50576601	50577399	+	71.3185	798	promoter-TSS	-promoter-TSS (LOC115703400)	-648	LOC115703400	LOC115703400	XR_004009166	small nucleolar RNA R71	snoRNA	NA	NA	NA	NA	NA	NA
1.2657903098277635e-06	NC_044373.1	33001	33999	+	71.2761	998	Intergenic	Intergenic	24280	LOC115714018	LOC115714018	XM_030642527	7-dehydrocholesterol reductase-like	protein_coding	-0.069184796	1	1	-0.493769659	1	1
5.231643022714556e-05	NC_044370.1	5747401	5748199	+	71.2552	798	Intergenic	Intergenic	2884	LOC115706011	LOC115706011	XR_004009558	uncharacterized LOC115706011	lncRNA	NA	NA	NA	NA	NA	NA
1.1497803038211087e-06	NC_044376.1	34655001	34656199	+	71.2345	1198	Intergenic	Intergenic	23123	LOC115723276	LOC115723276	XM_030652719	DNA-directed RNA polymerase III subunit rpc9	protein_coding	-0.587760385	1	1	-0.25568799	1	1
1.044419524912487e-06	NC_044370.1	42427601	42429399	+	71.1937	1798	Intergenic	Intergenic	-62985	LOC115702553	LOC115702553	XM_030629976	uncharacterized LOC115702553	protein_coding	0.638243466	1	1	-0.462127845	1	1
9.487288218018018e-07	NC_044375.1	46061001	46062999	+	71.1536	1998	Intergenic	Intergenic	47138	LOC115720127	LOC115720127	XM_030649288	uncharacterized LOC115720127	protein_coding	NA	NA	NA	NA	NA	NA
4.303792717062122e-05	NC_044371.1	288001	289399	+	71.1339	1398	promoter-TSS	-promoter-TSS (LOC115705473)	1514	LOC115708430	LOC115708430	XR_004009931	small nucleolar RNA R71	snoRNA	NA	NA	NA	NA	NA	NA
3.5410099860234266e-05	NC_044373.1	76528001	76529199	+	71.0194	1198	Intergenic	Intergenic	5868	LOC115713691	LOC115713691	XM_030642173	uncharacterized LOC115713691	protein_coding	NA	NA	NA	NA	NA	NA
3.5410099860234266e-05-2	NC_044375.1	13000201	13000999	+	71.0194	798	Intergenic	Intergenic	-148927	LOC115719864	LOC115719864	XM_030649044	serine/arginine-rich splicing factor 11-like	protein_coding	NA	NA	NA	NA	NA	NA
3.5410099860234266e-05-3	NC_044377.1	43580801	43581599	+	71.0194	798	Intergenic	Intergenic	-520981	LOC115695201	LOC115695201	XM_030622286	uncharacterized LOC115695201	protein_coding	NA	NA	NA	NA	NA	NA
3.212093650797668e-05	NC_044372.1	79062001	79063199	+	70.9645	1198	Intergenic	Intergenic	10199	LOC115708699	LOC115708699	XM_030636693	protein POLYCHOME	protein_coding	3.934253506	0.077306207	0.432244682	0.295541837	1	1
5.331998695387625e-07	NC_044370.1	133801	135599	+	70.9287	1798	intron	-intron (LOC115702611, intron 8 of 18)	5987	LOC115702611	LOC115702611	XM_030630031	phosphoinositide phosphatase SAC7	protein_coding	-0.438716566	1	1	-0.248502251	1	1
2.9138319167172324e-05	NC_044374.1	55916801	55917799	+	70.9111	998	Intergenic	Intergenic	19305	LOC115716233	LOC115716233	XM_030644985	probable mediator of RNA polymerase II transcription subunit 37e	protein_coding	-1.225766947	0.40300161	1	-0.782706728	1	1
4.844012584576518e-07	NC_044371.1	55500801	55501999	+	70.8936	1198	Intergenic	Intergenic	-81467	LOC115706867	LOC115706867	XM_030634626	ferritin-3, chloroplastic-like	protein_coding	-2.93263891	4.28E-16	3.52E-14	-0.247177711	1	1
2.643357491796104e-05-2	NC_044373.1	59532201	59532999	+	70.8591	798	Intergenic	Intergenic	-159188	LOC115713544	LOC115713544	XM_030642028	uncharacterized LOC115713544	protein_coding	0.410947537	1	NA	0.998328082	1	NA
2.643357491796104e-05	NC_044371.1	1104801	1105599	+	70.8591	798	Intergenic	Intergenic	17086	LOC115706647	LOC115706647	XM_030634363	ATP-dependent DNA helicase SRS2-like protein At4g25120	protein_coding	0.351981515	1	1	-0.599599559	1	1
1.1406448410625866e-10	NC_044371.1	8240401	8242199	+	70.8185	1798	Intergenic	Intergenic	-9594	LOC115703735	LOC115703735	XM_030630968	uncharacterized LOC115703735	protein_coding	NA	NA	NA	NA	NA	NA
2.39807229248711e-05	NC_044374.1	53642401	53643799	+	70.8084	1398	Intergenic	Intergenic	33378	LOC115718260	LOC115718260	XR_004011843	small nucleolar RNA R71	snoRNA	NA	NA	NA	NA	NA	NA
1.474393175555552e-05	NC_044375.1	35998801	35999599	+	70.574	798	Intergenic	Intergenic	-30369	LOC115720823	LOC115720823	XM_030650000	probable E3 ubiquitin-protein ligase LUL4	protein_coding	0.38827468	1	1	0.026139254	1	1
1.2139844893453287e-05	NC_044379.1	175401	176399	+	70.4882	998	Intergenic	Intergenic	145144	LOC115700627	LOC115700627	XM_030628235	protein sym-1	protein_coding	-0.181563454	1	1	-0.164646111	1	1
9.996958537297987e-06-2	NC_044378.1	65731401	65732399	+	70.4064	998	TTS	-TTS (LOC115698359)	401	LOC115698359	LOC115698359	XR_004008111	small nucleolar RNA R71	snoRNA	NA	NA	NA	NA	NA	NA
9.996958537297987e-06	NC_044378.1	44436401	44437399	+	70.4064	998	Intergenic	Intergenic	-22884	LOC115697164	LOC115697164	XM_030624074	probable LRR receptor-like serine/threonine-protein kinase At1g56140,	protein_coding	-1.117736245	0.552636589	1	0.464682655	1	1
9.496440622613386e-08	NC_044370.1	9936801	9939199	+	70.38	2398	promoter-TSS	-promoter-TSS (LOC115716008)	-1689	LOC115716008	LOC115716008	XM_030644699	transcription factor MYB2-like	protein_coding	NA	NA	NA	NA	NA	NA
9.072259671700945e-06	NC_044372.1	33105201	33105999	+	70.3669	798	Intergenic	Intergenic	-4089	LOC115709946	LOC115709946	XM_030638217	fumarate hydratase 1, mitochondrial	protein_coding	0.497233358	1	1	0.173754161	1	1
8.233345024599733e-06	NC_044373.1	45809001	45809999	+	70.3283	998	Intergenic	Intergenic	-28922	TRNAL-AAG_4	TRNAL-AAG_4	TRNAL-AAG_4	#N/A	tRNA	NA	NA	NA	NA	NA	NA
7.47223055852005e-06	NC_044377.1	25433801	25434599	+	70.2906	798	Intergenic	Intergenic	34119	LOC115695063	LOC115695063	XM_030622159	probable auxin efflux carrier component 1c	protein_coding	3.570760702	0.436818732	NA	4.15813309	0.339451176	1
4.602684500451158e-06	NC_044370.1	91694001	91694999	+	70.1143	998	Intergenic	Intergenic	-3967	LOC115697820	LOC115697820	XM_030624966	D-amino-acid transaminase, chloroplastic,	protein_coding	1.106975697	0.632087676	1	0.546554536	1	1
3.442669253456882e-06	NC_044379.1	15278801	15279999	+	70.0174	1198	Intergenic	Intergenic	-34272	LOC115700615	LOC115700615	XM_030628222	peptidyl-prolyl cis-trans isomerase CYP23,	protein_coding	0.66703276	1	1	-0.259137089	1	1
0.0005832656130396569	NC_044378.1	36534001	36534599	+	69.9864	598	Intergenic	Intergenic	-18369	LOC115696535	LOC115696535	XM_030623432	uncharacterized LOC115696535	protein_coding	NA	NA	NA	NA	NA	NA
1.6989343531884728e-08	NC_044372.1	70451801	70453199	+	69.9661	1398	Intergenic	Intergenic	-9199	LOC115711477	LOC115711477	XM_030639817	PAN domain-containing protein At5g03700	protein_coding	0.26569044	1	1	-0.288799046	1	1
1.5442126331131408e-08	NC_044373.1	52644401	52646399	+	69.946	1998	Intergenic	Intergenic	-88665	LOC115712818	LOC115712818	XM_030641196	glucose-1-phosphate adenylyltransferase large subunit 1	protein_coding	0.030784499	1	1	-0.72227518	1	1
2.575640252755597e-06	NC_044376.1	53258801	53259999	+	69.9263	1198	Intergenic	Intergenic	-492536	LOC115724380	LOC115724380	XR_004013173	small nucleolar RNA R71	snoRNA	NA	NA	NA	NA	NA	NA
2.3383240091932496e-06-2	NC_044376.1	53335801	53336999	+	69.8971	1198	Intergenic	Intergenic	-540313	LOC115724262	LOC115724262	XR_004013061	small nucleolar RNA R71	snoRNA	NA	NA	NA	NA	NA	NA
2.3383240091932496e-06	NC_044374.1	45109801	45111199	+	69.8971	1398	Intergenic	Intergenic	-23158	LOC115717333	LOC115717333	XR_004011733	uncharacterized LOC115717333	lncRNA	NA	NA	NA	NA	NA	NA
2.1229285057942645e-06	NC_044372.1	33240601	33241799	+	69.8686	1198	Intergenic	Intergenic	-15859	LOC115710631	LOC115710631	XM_030638988	uncharacterized LOC115710631	protein_coding	NA	NA	NA	NA	NA	NA
0.0004777058531188527	NC_044373.1	7006601	7007199	+	69.8686	598	promoter-TSS	-promoter-TSS (LOC115715427)	-1097	LOC115715427	LOC115715427	XR_004011298	small nucleolar RNA R71	snoRNA	NA	NA	NA	NA	NA	NA
0.00043237877975135943	NC_044373.1	53822401	53822999	+	69.8131	598	Intergenic	Intergenic	55230	LOC115714286	LOC115714286	XM_030642932	dnaJ homolog subfamily B member 4	protein_coding	1.679071491	0.005478867	0.04896339	0.134126688	1	1
0.00043237877975135943-2	NC_044379.1	13787801	13788399	+	69.8131	598	Intergenic	Intergenic	-9843	LOC115699865	LOC115699865	XM_030627407	uncharacterized LOC115699865	protein_coding	NA	NA	NA	NA	NA	NA
1.4426711308419847e-06	NC_044373.1	41112601	41113599	+	69.7597	998	Intergenic	Intergenic	-8471	LOC115712833	LOC115712833	XM_030641220	uncharacterized LOC115712833	protein_coding	1.235812091	0.374281298	1	0.870890337	1	1
0.0003913856643928431	NC_044376.1	28507001	28507599	+	69.7597	598	Intergenic	Intergenic	-9965	LOC115723737	LOC115723737	XM_030653214	uncharacterized LOC115723737	protein_coding	NA	NA	NA	NA	NA	NA
1.4426711308419847e-06-2	NC_044378.1	58085001	58085999	+	69.7597	998	Intergenic	Intergenic	-13805	LOC115696680	LOC115696680	XM_030623570	uncharacterized LOC115696680	protein_coding	NA	NA	NA	NA	NA	NA
9.80771576536239e-07	NC_044370.1	65471201	65472399	+	69.6589	1198	Intergenic	Intergenic	5311	LOC115723426	LOC115723426	XM_030652917	4,5:9,10-diseco-3-hydroxy-5,9,17-trioxoandrosta-1(10),2-diene-4-oate hydrolase	protein_coding	-3.015673975	0.046723385	0.289397505	-4.797828416	0.000111432	0.001457076
2.7739713240391525e-09	NC_044374.1	11176401	11178199	+	69.6269	1798	intron	-intron (LOC115717173, intron 1 of 1)	693	LOC115717173	LOC115717173	XM_030646125	uncharacterized LOC115717173	protein_coding	2.46103524	0.216827275	0.953791922	3.040131686	0.08381238	0.501699222
0.00029042844108955916	NC_044373.1	73031201	73031999	+	69.6112	798	promoter-TSS	-promoter-TSS (LOC115713665)	-1489	LOC115713665	LOC115713665	XM_030642150	putative U-box domain-containing protein 50	protein_coding	NA	NA	NA	NA	NA	NA
0.00029042844108955916-2	NC_044378.1	12336601	12337199	+	69.6112	598	Intergenic	Intergenic	-7973	LOC115697092	LOC115697092	XM_030623999	paired amphipathic helix protein Sin3-like 1	protein_coding	0.960055856	1	1	-0.6003848	1	1
7.522850342220749e-12	NC_044373.1	83737801	83739399	+	69.5995	1598	Intergenic	Intergenic	-7090	LOC115714396	LOC115714396	XM_030643084	vicilin-like seed storage protein At2g18540	protein_coding	5.426459921	0.001249558	0.014005979	-0.649833918	1	1
0.00026297768716883205	NC_044376.1	57848401	57849199	+	69.5652	798	Intergenic	Intergenic	43887	LOC115724365	LOC115724365	XR_004013158	small nucleolar RNA R71	snoRNA	NA	NA	NA	NA	NA	NA
0.00023813959800254769	NC_044371.1	50038401	50039199	+	69.5207	798	promoter-TSS	-promoter-TSS (LOC115704114)	1450	LOC115704115	LOC115704115	XM_030631335	uncharacterized LOC115704115	protein_coding	NA	NA	NA	NA	NA	NA
4.996325080400179e-07	NC_044378.1	53218401	53220199	+	69.4991	1798	Intergenic	Intergenic	-126673	LOC115696649	LOC115696649	XM_030623540	uncharacterized LOC115696649	protein_coding	NA	NA	NA	NA	NA	NA
0.0002156634672570678	NW_022060476.1	952801	953599	+	69.4779	798	Intergenic	Intergenic	221400	LOC115702188	LOC115702188	XM_030629636	#N/A	protein_coding	NA	NA	NA	NA	NA	NA
3.7433071664470287e-07	NC_044370.1	88907801	88909799	+	69.4364	1998	Intergenic	Intergenic	-29183	LOC115713272	LOC115713272	XR_004010984	uncharacterized LOC115713272	lncRNA	NA	NA	NA	NA	NA	NA
0.0001953228782095712	NC_044376.1	18928001	18928799	+	69.4364	798	Intergenic	Intergenic	-14916	LOC115723640	LOC115723640	XM_030653124	uncharacterized LOC115723640	protein_coding	NA	NA	NA	NA	NA	NA
0.00016025006410241103	NC_044371.1	54736801	54737599	+	69.3575	798	Intergenic	Intergenic	-174273	LOC115704145	LOC115704145	XM_030631362	uncharacterized LOC115704145	protein_coding	NA	NA	NA	NA	NA	NA
4.133791138806535e-10	NC_044378.1	43140201	43142799	+	69.3449	2598	Intergenic	Intergenic	-39798	LOC115696846	LOC115696846	XM_030623731	peroxidase 19	protein_coding	-0.737765572	1	1	2.983038627	8.28E-10	2.26E-08
0.00014516619293560061	NW_022060504.1	28601	29599	+	69.32	998	Intergenic	Intergenic	-18730	LOC115702226	LOC115702226	XM_030629672	#N/A	protein_coding	5.988053217	0.000387101	0.005146082	2.514034289	0.093373362	0.549551344
0.0001315108998284681-3	NW_022060454.1	644001	644799	+	69.2837	798	Intergenic	Intergenic	140242	LOC115702127	LOC115702127	XM_030629586	#N/A	protein_coding	-1.078418672	0.906335909	1	0.136444746	1	1
0.0001315108998284681	NC_044372.1	68999001	68999599	+	69.2837	598	Intergenic	Intergenic	17888	LOC115710886	LOC115710886	XM_030639238	uncharacterized LOC115710886	protein_coding	NA	NA	NA	NA	NA	NA
0.0001315108998284681-2	NC_044375.1	38422201	38422999	+	69.2837	798	Intergenic	Intergenic	-120989	LOC115721222	LOC115721222	XM_030650479	uncharacterized LOC115721222	protein_coding	-0.30087518	1	1	-0.209222848	1	1
1.575941753481798e-07	NC_044377.1	54297201	54298799	+	69.2659	1598	Intergenic	Intergenic	29982	LOC115695275	LOC115695275	XM_030622352	uncharacterized LOC115695275	protein_coding	NA	NA	NA	NA	NA	NA
1.0734173235538767e-07	NC_044376.1	55815001	55816599	+	69.1976	1598	exon	-exon (LOC115723472, exon 2 of 2)	454	LOC115723472	LOC115723472	XR_004012969	uncharacterized LOC115723472	lncRNA	NA	NA	NA	NA	NA	NA
9.781793749975003e-05	NC_044373.1	63164601	63165399	+	69.1812	798	Intergenic	Intergenic	21493	LOC115715076	LOC115715076	XM_030643868	uncharacterized LOC115715076,	protein_coding	0.15322716	1	1	-0.749294848	1	1
9.781793749975003e-05-2	NC_044376.1	19271001	19271799	+	69.1812	798	Intergenic	Intergenic	50778	LOC115723475	LOC115723475	XM_030652966	#N/A	protein_coding	-0.889900275	1	1	-0.70416355	1	1
9.781793749975003e-05-4	NC_044378.1	66759201	66759999	+	69.1812	798	Intergenic	Intergenic	7788	LOC115698116	LOC115698116	XM_030625290	1-acylglycerol-3-phosphate O-acyltransferase	protein_coding	-0.633987188	1	1	-0.132771542	1	1
9.781793749975003e-05-3	NC_044377.1	22967001	22967799	+	69.1812	798	Intergenic	Intergenic	-31461	LOC115695057	LOC115695057	XM_030622155	uncharacterized LOC115695057	protein_coding	-1.512629836	0.90002605	NA	0	1	NA
8.863899740713345e-05	NC_044372.1	35601601	35602799	+	69.149	1198	Intergenic	Intergenic	-5052	LOC115711774	LOC115711774	XR_004010650	small nucleolar RNA R71	snoRNA	NA	NA	NA	NA	NA	NA
7.279731398461492e-05	NC_044375.1	49592401	49593199	+	69.0875	798	Intergenic	Intergenic	28591	LOC115720597	LOC115720597	XM_030649745	protein YIPF1 homolog	protein_coding	-0.349184763	1	1	-0.429806806	1	1
7.279731398461492e-05-2	NC_044377.1	59607801	59608599	+	69.0875	798	Intergenic	Intergenic	-141565	LOC115724466	LOC115724466	XM_030653757	AAA-ATPase At4g30250	protein_coding	3.632177459	0.048882305	0.29992485	0.524884316	1	1
5.980069579191859e-05	NC_044371.1	771201	771999	+	69.0294	798	promoter-TSS	-promoter-TSS (LOC115704967)	-1491	LOC115704967	LOC115704967	XM_030632186	uncharacterized LOC115704967,	protein_coding	0.21638905	1	1	0.345312966	1	1
5.980069579191859e-05-2	NC_044377.1	26075401	26076199	+	69.0294	798	Intergenic	Intergenic	23124	LOC115724977	LOC115724977	XM_030654366	T-complex protein 1 subunit alpha	protein_coding	-0.39156918	1	1	-0.740588901	1	1
5.4204840932828104e-05-2	NC_044378.1	12527601	12528399	+	69.0016	798	Intergenic	Intergenic	28899	LOC115696222	LOC115696222	XR_004007767	uncharacterized LOC115696222	lncRNA	-1.99256312	0.737036279	NA	0.036557106	1	NA
5.4204840932828104e-05	NC_044370.1	21878801	21879799	+	69.0016	998	Intergenic	Intergenic	3842	LOC115706519	LOC115706519	XR_004009598	uncharacterized LOC115706519	lncRNA	NA	NA	NA	NA	NA	NA
1.6378628434067232e-11	NC_044378.1	32736601	32739999	+	68.9835	3398	Intergenic	Intergenic	-17164	LOC115696220	LOC115696220	XM_030623124	protein ALP1-like,	protein_coding	0	1	NA	-1.928988103	0.817671192	NA
4.9135291990969526e-05-2	NC_044378.1	61313601	61314599	+	68.9745	998	Intergenic	Intergenic	-47457	LOC115696702	LOC115696702	XM_030623592	putative disease resistance protein At1g50180	protein_coding	NA	NA	NA	NA	NA	NA
4.9135291990969526e-05	NC_044378.1	12170801	12172199	+	68.9745	1398	Intergenic	Intergenic	-36647	LOC115696351	LOC115696351	XM_030623255	uncharacterized LOC115696351	protein_coding	NA	NA	NA	NA	NA	NA
4.454225275087325e-05	NC_044373.1	6734401	6735199	+	68.9482	798	Intergenic	Intergenic	22667	LOC115713130	LOC115713130	XM_030641616	#N/A	protein_coding	4.783500208	0.122066292	0.617657363	5.370887402	0.074064918	0.453722707
1.913127959226192e-08	NC_044373.1	81626801	81627999	+	68.9353	1198	Intergenic	Intergenic	-8456	LOC115713755	LOC115713755	XM_030642237	uncharacterized LOC115713755	protein_coding	NA	NA	NA	NA	NA	NA
4.0380671511391146e-05-2	NC_044371.1	59947401	59949399	+	68.9225	1998	Intergenic	Intergenic	-29080	LOC115704770	LOC115704770	XM_030631976	uncharacterized LOC115704770,	protein_coding	-1.816594744	6.89E-05	0.001113576	1.028991345	0.887830433	1
4.0380671511391146e-05	NC_044370.1	37472001	37472799	+	68.9225	798	Intergenic	Intergenic	138382	LOC115720202	LOC115720202	XM_030649358	uncharacterized LOC115720202	protein_coding	0.833370229	1	NA	2.303207119	0.594919231	1
6.978399351152108e-12	NC_044376.1	35630601	35633599	+	68.9058	2998	Intergenic	Intergenic	8637	LOC115721905	LOC115721905	XM_030651009	uncharacterized protein YwkD	protein_coding	0.021800132	1	1	1.193552855	0.486838177	1
3.0096060092705644e-05	NC_044374.1	396001	396799	+	68.8495	798	Intergenic	Intergenic	-14298	LOC115716501	LOC115716501	XM_030645312	calmodulin-interacting protein 111	protein_coding	-0.141820998	1	1	-0.116443958	1	1
2.244064000572184e-05	NC_044371.1	7472001	7472999	+	68.7819	998	Intergenic	Intergenic	17760	LOC115703733	LOC115703733	XM_030630965	uncharacterized LOC115703733	protein_coding	NA	NA	NA	NA	NA	NA
2.035092121934786e-05	NC_044370.1	44539401	44540399	+	68.7604	998	Intergenic	Intergenic	6844	LOC115711214	LOC115711214	XM_030639545	protein RICE SALT SENSITIVE 3	protein_coding	0.556250756	1	1	1.249656978	0.75975891	1
1.673940472119908e-05	NC_044378.1	34389401	34390799	+	68.719	1398	Intergenic	Intergenic	-10044	LOC115696984	LOC115696984	XM_030623880	polygalacturonase QRT3	protein_coding	-2.204637088	0.003781344	0.035860272	4.757588033	4.63E-05	0.000655328
1.9328099981762484e-09	NC_044379.1	14358401	14359799	+	68.6699	1398	Intergenic	Intergenic	-19090	LOC115698657	LOC115698657	XM_030625787	nuclear transcription factor Y subunit A-10	protein_coding	-0.978776783	1	1	-5.5714291	2.07E-17	1.12E-15
1.1331186572753158e-05-2	NC_044373.1	59899601	59900799	+	68.6418	1198	Intergenic	Intergenic	-65941	LOC115715202	LOC115715202	XM_030644044	auxin efflux carrier component 3,	protein_coding	-1.290616308	0.389334714	1	0.436894904	1	1
1.1331186572753158e-05-3	NC_044378.1	53296201	53297199	+	68.6418	998	Intergenic	Intergenic	-49273	LOC115696649	LOC115696649	XM_030623540	uncharacterized LOC115696649	protein_coding	NA	NA	NA	NA	NA	NA
1.1331186572753158e-05	NC_044370.1	33032601	33033599	+	68.6418	998	Intergenic	Intergenic	-6724	LOC115719859	LOC115719859	XM_030649040	uncharacterized LOC115719859	protein_coding	1.340197996	0.932810208	NA	1.927570805	0.818185488	NA
1.0279071957970623e-05	NC_044376.1	18695801	18696999	+	68.6236	1198	Intergenic	Intergenic	-23269	LOC115724252	LOC115724252	XR_004013052	small nucleolar RNA R71	snoRNA	NA	NA	NA	NA	NA	NA
9.325017887166003e-06	NC_044375.1	30567601	30568599	+	68.6058	998	Intergenic	Intergenic	3037	LOC115721483	LOC115721483	XR_004012504	U1 spliceosomal RNA	snRNA	0	1	NA	-0.925217262	1	NA
6.963660147984149e-06	NC_044371.1	43060001	43061199	+	68.5547	1198	Intergenic	Intergenic	-8391	LOC115706810	LOC115706810	XM_030634550	serine/threonine-protein kinase RIPK	protein_coding	1.296764818	0.438875692	1	3.109540383	2.31E-07	4.65E-06
6.963660147984149e-06-2	NC_044371.1	54831801	54833199	+	68.5547	1398	Intergenic	Intergenic	-78973	LOC115704145	LOC115704145	XM_030631362	uncharacterized LOC115704145	protein_coding	NA	NA	NA	NA	NA	NA
5.7329373863941664e-06	NC_044373.1	22278001	22278999	+	68.5223	998	Intergenic	Intergenic	13190	LOC115713245	LOC115713245	XM_030641728	uncharacterized LOC115713245	protein_coding	NA	NA	NA	NA	NA	NA
5.202002081185083e-06	NC_044379.1	13481801	13483599	+	68.5067	1798	Intergenic	Intergenic	12611	LOC115698960	LOC115698960	XM_030626174	exocyst complex component EXO70A1	protein_coding	-0.589382379	1	1	1.473264822	0.409422347	1
4.720404052725575e-06	NC_044374.1	35816801	35817799	+	68.4914	998	Intergenic	Intergenic	24718	LOC115717715	LOC115717715	XM_030646695	uncharacterized LOC115717715	protein_coding	NA	NA	NA	NA	NA	NA
4.283540806991157e-06	NC_044373.1	72090001	72091799	+	68.4763	1798	Intergenic	Intergenic	-17369	LOC115712026	LOC115712026	XM_030640230	uncharacterized LOC115712026	protein_coding	1.369832499	0.926926691	NA	0.995440397	1	NA
2.3935846645103963e-06	NC_044377.1	69352801	69353999	+	68.3922	1198	Intergenic	Intergenic	-3790	LOC115695420	LOC115695420	XM_030622485	uncharacterized LOC115695420	protein_coding	NA	NA	NA	NA	NA	NA
2.172559087817513e-06	NC_044370.1	76853201	76853999	+	68.3791	798	Intergenic	Intergenic	-46937	LOC115724922	LOC115724922	XM_030654299	uncharacterized LOC115724922	protein_coding	NA	NA	NA	NA	NA	NA
1.9720035250419056e-06	NC_044379.1	27206401	27208399	+	68.3663	1998	exon	-exon (LOC115699972, exon 4 of 4)	1799	LOC115699972	LOC115699972	XM_030627516	uncharacterized LOC115699972	protein_coding	NA	NA	NA	NA	NA	NA
1.9720035250419056e-06-2	NW_022060417.1	2368201	2369599	+	68.3663	1398	Intergenic	Intergenic	-61859	LOC115702065	LOC115702065	XM_030629515	#N/A	protein_coding	-0.933735437	1	1	-0.113826937	1	1
2.6723933402816293e-11	NC_044371.1	29859601	29861199	+	68.3292	1598	Intergenic	Intergenic	17010	LOC115705204	LOC115705204	XR_004009415	uncharacterized LOC115705204	lncRNA	NA	NA	NA	NA	NA	NA
1.1035505759725978e-06	NC_044376.1	38249001	38250599	+	68.2941	1598	Intergenic	Intergenic	-17016	LOC115724245	LOC115724245	XR_004013046	small nucleolar RNA R71	snoRNA	NA	NA	NA	NA	NA	NA
1.1035505759725978e-06-2	NC_044376.1	43794001	43795199	+	68.2941	1198	Intergenic	Intergenic	-33304	LOC115723851	LOC115723851	XM_030653316	uncharacterized LOC115723851	protein_coding	NA	NA	NA	NA	NA	NA
8.258448929961212e-07	NC_044374.1	8990801	8991999	+	68.2607	1198	Intergenic	Intergenic	-4488	LOC115717540	LOC115717540	XM_030646526	uncharacterized LOC115717540	protein_coding	NA	NA	NA	NA	NA	NA
6.181698742208552e-07	NC_044374.1	85427001	85428399	+	68.2291	1398	Intergenic	Intergenic	-149596	LOC115716182	LOC115716182	XM_030644921	uncharacterized LOC115716182	protein_coding	2.012420156	0.009106107	0.074678623	-0.135857219	1	1
5.613061241474245e-07	NC_044373.1	91894801	91896199	+	68.2189	1398	Intergenic	Intergenic	37123	LOC115713915	LOC115713915	XM_030642394	THO complex subunit 1-like	protein_coding	-0.227102173	1	1	0.121071833	1	1
5.096858167061097e-07	NC_044374.1	49386001	49387599	+	68.2089	1598	Intergenic	Intergenic	-3102	LOC115717816	LOC115717816	XM_030646787	zinc finger MYM-type protein 1-like	protein_coding	NA	NA	NA	NA	NA	NA
2.8585005902284955e-07	NC_044379.1	3663201	3665199	+	68.1521	1998	Intergenic	Intergenic	-37113	LOC115699501	LOC115699501	XM_030626950	protein TPR3,	protein_coding	0.587360955	1	1	0.220858208	1	1
2.3577460015179202e-07	NC_044373.1	61753801	61755399	+	68.1344	1598	Intergenic	Intergenic	5621	LOC115715004	LOC115715004	XR_004011159	uncharacterized LOC115715004	lncRNA	NA	NA	NA	NA	NA	NA
8.187087679560633e-08	NC_044374.1	57675001	57676599	+	68.0458	1598	Intergenic	Intergenic	-125747	LOC115716036	LOC115716036	XM_030644723	kinesin-like protein KIN-14J	protein_coding	1.060800693	0.82290807	1	0.656228827	1	1
4.602561407820673e-08	NC_044373.1	61817601	61818999	+	68.0032	1398	Intergenic	Intergenic	-31837	LOC115713558	LOC115713558	XM_030642042	uncharacterized LOC115713558	protein_coding	NA	NA	NA	NA	NA	NA
3.4517596541026376e-08	NC_044375.1	44624601	44626199	+	67.9832	1598	Intergenic	Intergenic	-84687	LOC115720120	LOC115720120	XM_030649281	uncharacterized LOC115720120	protein_coding	0.689331956	1	1	0.219661927	1	1
1.4573311744529411e-08-2	NC_044378.1	36333801	36335999	+	67.9276	2198	Intergenic	Intergenic	-51194	LOC115698071	LOC115698071	XM_030625252	long-chain-alcohol oxidase FAO4A	protein_coding	1.556505438	0.117963239	0.602422489	1.152853093	0.658091099	1
1.4573311744529411e-08	NC_044370.1	70048001	70050799	+	67.9276	2798	Intergenic	Intergenic	-31529	LOC115713766	LOC115713766	XM_030642252	probable serine/threonine-protein kinase PBL11	protein_coding	2.110179883	0.033709064	0.221990181	0.686475609	1	1
3.1559561146196848e-09	NC_044376.1	25074201	25076799	+	67.8432	2598	Intergenic	Intergenic	16452	LOC115723700	LOC115723700	XM_030653181	uncharacterized LOC115723700	protein_coding	NA	NA	NA	NA	NA	NA
1.1045858223462538e-09	NC_044370.1	74107001	74109599	+	67.7936	2598	Intergenic	Intergenic	159989	LOC115714390	LOC115714390	XM_030643079	uncharacterized LOC115714390	protein_coding	NA	NA	NA	NA	NA	NA
1.004113499416907e-09	NC_044370.1	20740001	20741999	+	67.7894	1998	exon	-exon (LOC115717929, exon 3 of 4)	1984	LOC115717929	LOC115717929	XM_030646898	uncharacterized LOC115717929	protein_coding	2.318046374	0.52383738	NA	2.905451475	0.356773428	1
7.858282564709053e-12	NC_044378.1	4581201	4583799	+	67.6217	2598	Intergenic	Intergenic	-5376	LOC115696266	LOC115696266	XM_030623176	stemmadenine O-acetyltransferase	protein_coding	-1.512629836	0.90002605	NA	0	1	NA
1.5405750497019656e-05	NC_044374.1	47665201	47667199	+	67.0116	1998	Intergenic	Intergenic	157258	LOC115717803	LOC115717803	XM_030646776	nodulation receptor kinase-like	protein_coding	NA	NA	NA	NA	NA	NA
5.51567423390713e-05	NC_044370.1	667601	668599	+	67.0116	998	Intergenic	Intergenic	2689	LOC115702887	LOC115702887	XM_030630342	stemmadenine O-acetyltransferase-like	protein_coding	1.987987413	0.80439245	NA	2.575354829	0.69290706	NA
3.846954695908946e-09	NC_044370.1	95140001	95142399	+	67.0116	2398	promoter-TSS	-promoter-TSS (LOC115703267)	-39	LOC115703267	LOC115703267	XR_004009045	small nucleolar RNA R71	snoRNA	NA	NA	NA	NA	NA	NA
4.640819953501485e-08	NC_044377.1	42836801	42838599	+	67.0116	1798	Intergenic	Intergenic	51273	LOC115695200	LOC115695200	XM_030622285	uncharacterized LOC115695200	protein_coding	NA	NA	NA	NA	NA	NA
0.0002972476934637234-3	NW_022060498.1	287001	287799	+	67.0116	798	Intergenic	Intergenic	70655	LOC115702218	LOC115702218	XM_030629666	#N/A	protein_coding	2.569029717	0.001055133	0.01225548	-2.343864434	0.003822994	0.035550945
1.698856412319861e-05	NC_044374.1	74574801	74575799	+	67.0116	998	Intergenic	Intergenic	95648	LOC115716969	LOC115716969	XM_030645897	uncharacterized LOC115716969,	protein_coding	NA	NA	NA	NA	NA	NA
0.00040115118519379046-4	NW_022060487.1	811801	812399	+	67.0116	598	NA	NA	NA	NA			#N/A		NA	NA	NA	NA	NA	NA
2.625001858936574e-09-2	NC_044379.1	36733001	36735599	+	67.0116	2598	Intergenic	Intergenic	92551	LOC115698693	LOC115698693	XM_030625834	uncharacterized LOC115698693	protein_coding	-0.224023462	1	1	0.180708744	1	1
2.625001858936574e-09	NC_044373.1	40260001	40261999	+	67.0116	1998	Intergenic	Intergenic	-6794	LOC115712709	LOC115712709	XM_030641045	translocator protein homolog	protein_coding	1.002663859	0.99436213	1	1.199843631	0.587665151	1
1.0127433202462944e-06	NC_044374.1	72649401	72650799	+	67.0116	1398	Intergenic	Intergenic	-78103	LOC115717969	LOC115717969	XM_030646937	uncharacterized LOC115717969	protein_coding	NA	NA	NA	NA	NA	NA
1.2290046936462321e-06	NC_044377.1	43306601	43307999	+	67.0116	1398	Intergenic	Intergenic	-247081	LOC115695201	LOC115695201	XM_030622286	uncharacterized LOC115695201	protein_coding	NA	NA	NA	NA	NA	NA
0.00040115118519379046	NC_044370.1	47784601	47785199	+	67.0116	598	Intergenic	Intergenic	3940	LOC115711376	LOC115711376	XM_030639713	receptor-like protein 44	protein_coding	-0.599884041	1	1	-0.129089197	1	1
0.00032845230405481075-2	NC_044375.1	58098401	58099199	+	67.0116	798	Intergenic	Intergenic	30074	LOC115720219	LOC115720219	XM_030649376	uncharacterized LOC115720219	protein_coding	NA	NA	NA	NA	NA	NA
6.71721767915755e-05	NC_044370.1	35538201	35538999	+	67.0116	798	Intergenic	Intergenic	140377	LOC115710400	LOC115710400	XM_030638766	G-type lectin S-receptor-like serine/threonine-protein kinase LECRK1	protein_coding	0	1	NA	-1.694662035	0.863807158	NA
0.0002972476934637234-2	NC_044374.1	11076201	11076799	+	67.0116	598	exon	-exon (LOC115717559, exon 2 of 2)	300	LOC115717559	LOC115717559	XM_030646544	uncharacterized LOC115717559	protein_coding	0.410947537	1	NA	0.998328082	1	NA
0.0002972476934637234	NC_044373.1	58733001	58733599	+	67.0116	598	Intergenic	Intergenic	14047	LOC115712264	LOC115712264	XM_030640520	shikimate O-hydroxycinnamoyltransferase	protein_coding	0.859651311	1	1	4.339753965	0.096545559	0.565509925
1.3971064234810407e-05	NC_044371.1	63848401	63849999	+	67.0116	1598	Intergenic	Intergenic	53864	LOC115704219	LOC115704219	XM_030631434	uncharacterized LOC115704219	protein_coding	NA	NA	NA	NA	NA	NA
6.086677286067647e-05-2	NC_044374.1	41025201	41026399	+	67.0116	1198	Intergenic	Intergenic	-30877	LOC115716718	LOC115716718	XM_030645594	uncharacterized LOC115716718	protein_coding	-1.397375927	0.846161153	1	-1.245376921	0.903424227	1
0.0004433967789168747-2	NC_044373.1	42815201	42815799	+	67.0116	598	Intergenic	Intergenic	-15108	LOC115713437	LOC115713437	XM_030641920	stress response protein NST1-like	protein_coding	0.333047658	1	NA	0.920448172	1	NA
0.00040115118519379046-2	NC_044371.1	72015401	72016199	+	67.0116	798	Intergenic	Intergenic	13110	LOC115704336	LOC115704336	XM_030631547	uncharacterized LOC115704336	protein_coding	NA	NA	NA	NA	NA	NA
0.0004433967789168747	NC_044371.1	55193601	55194199	+	67.0116	598	Intergenic	Intergenic	271035	LOC115707541	LOC115707541	XM_030635546	tRNA:m(4)X modification enzyme TRM13,	protein_coding	-0.377874846	1	1	-0.385378342	1	1
6.086677286067647e-05	NC_044372.1	52647801	52648599	+	67.0116	798	Intergenic	Intergenic	-87607	LOC115710761	LOC115710761	XM_030639114	uncharacterized LOC115710761	protein_coding	NA	NA	NA	NA	NA	NA
0.00032845230405481075	NC_044372.1	26536601	26537199	+	67.0116	598	Intergenic	Intergenic	21491	LOC115711201	LOC115711201	XM_030639526	transcription factor PRE3	protein_coding	5.163487515	0.068340889	0.392295695	5.750876908	0.03753269	0.259374393
3.57130174191647e-06	NC_044375.1	43742401	43743999	+	67.0116	1598	Intergenic	Intergenic	-51795	LOC115721317	LOC115721317	XM_030650591	tropomyosin-2-like	protein_coding	0.234417585	1	1	-1.706036753	0.502563852	1
0.00040115118519379046-3	NC_044378.1	49944801	49945599	+	67.0116	798	Intergenic	Intergenic	33749	LOC115697922	LOC115697922	XM_030625095	wall-associated receptor kinase-like 1	protein_coding	NA	NA	NA	NA	NA	NA
8.18262634502197e-05	NC_044379.1	9211401	9212199	+	67.0116	798	Intergenic	Intergenic	-297980	LOC115699809	LOC115699809	XM_030627352	uncharacterized LOC115699809	protein_coding	NA	NA	NA	NA	NA	NA
1.3971064234810407e-05-2	NC_044374.1	72701201	72702199	+	67.0116	998	Intergenic	Intergenic	-26503	LOC115717969	LOC115717969	XM_030646937	uncharacterized LOC115717969	protein_coding	NA	NA	NA	NA	NA	NA
1.3343381667452347e-08	NC_044374.1	23629801	23631599	+	67.0116	1798	Intergenic	Intergenic	48833	LOC115718319	LOC115718319	XR_004011898	small nucleolar RNA R71	snoRNA	NA	NA	NA	NA	NA	NA
1.5405750497019656e-05-2	NC_044374.1	51459001	51460599	+	67.0116	1598	Intergenic	Intergenic	62051	LOC115715725	LOC115715725	XM_030644392	gibberellin 20 oxidase 2	protein_coding	-1.817936378	0.013110812	0.101054185	2.867111588	7.58E-06	0.000121703
1.4916249923642221e-06	NC_044377.1	40938801	40940399	+	67.0116	1598	Intergenic	Intergenic	-23792	LOC115725313	LOC115725313	XR_004013366	uncharacterized LOC115725313	lncRNA	NA	NA	NA	NA	NA	NA
0.00036296807886137	NW_022060528.1	213801	214399	+	67.0116	598	Intergenic	Intergenic	-30612	LOC115702305	LOC115702305	XM_030629752	#N/A	protein_coding	NA	NA	NA	NA	NA	NA
0.0012145891527880937	NC_044372.1	19801001	19801599	+	67.0116	598	Intergenic	Intergenic	11934	LOC115710324	LOC115710324	XM_030638693	myb-related protein 306	protein_coding	2.385370928	0.000546941	0.006948138	2.327776048	0.000875915	0.009735824
2.940795905692219e-06	NC_044374.1	60108801	60109999	+	67.0116	1198	Intergenic	Intergenic	-346755	LOC115717877	LOC115717877	XM_030646848	uncharacterized LOC115717877	protein_coding	NA	NA	NA	NA	NA	NA
3.1782032887678233e-07	NC_044370.1	48779601	48780999	+	67.0116	1398	Intergenic	Intergenic	11792	LOC115721109	LOC115721109	XM_030650358	uncharacterized LOC115721109	protein_coding	NA	NA	NA	NA	NA	NA
1.223006923538637e-09	NC_044377.1	30239801	30242599	+	67.0116	2798	Intergenic	Intergenic	-9201	LOC115695086	LOC115695086	XM_030622179	uncharacterized LOC115695086	protein_coding	NA	NA	NA	NA	NA	NA
2.278793156896878e-05	NC_044370.1	87005201	87006999	+	67.0116	1798	Intergenic	Intergenic	31896	LOC115695657	LOC115695657	XM_030622719	protein MIZU-KUSSEI 1	protein_coding	3.543712726	2.57E-06	5.69E-05	0.145036664	1	1
0.0008104377169570074-2	NC_044376.1	35874401	35874999	+	67.0116	598	exon	-exon (LOC115723803, exon 2 of 3)	202	LOC115723803	LOC115723803	XM_030653273	uncharacterized LOC115723803	protein_coding	-2.079032467	0.786924321	NA	0.998307353	1	NA
8.575428771052178e-06-2	NC_044373.1	40284601	40285599	+	67.0116	998	Intergenic	Intergenic	-12542	LOC115712708	LOC115712708	XM_030641044	uncharacterized LOC115712708	protein_coding	-0.932615647	1	1	0.145258183	1	1
0.0007327164951306299-2	NW_022060526.1	35201	35799	+	67.0116	598	NA	NA	NA	NA			#N/A		NA	NA	NA	NA	NA	NA
2.7723437511354635e-05-2	NC_044372.1	46740001	46741199	+	67.0116	1198	Intergenic	Intergenic	-7638	LOC115711689	LOC115711689	XM_030640071	purple acid phosphatase 22	protein_coding	2.800036866	0.001611624	0.017453659	2.269725386	0.016295276	0.126848679
0.0007327164951306299	NC_044378.1	34114601	34115199	+	67.0116	598	Intergenic	Intergenic	19761	LOC115697126	LOC115697126	XM_030624041	cannabidiolic acid synthase-like 1	protein_coding	0.477275467	1	1	-0.951889574	1	1
8.575428771052178e-06	NC_044370.1	90505201	90506599	+	67.0116	1398	Intergenic	Intergenic	-46966	LOC115697565	LOC115697565	XR_004007958	uncharacterized LOC115697565,	lncRNA	0.749613363	1	1	-0.228430723	1	1
0.0008104377169570074	NC_044376.1	32047401	32047999	+	67.0116	598	Intergenic	Intergenic	15026	LOC115723345	LOC115723345	XM_030652788	protein SIEVE ELEMENT OCCLUSION B	protein_coding	3.785263316	9.91E-10	3.90E-08	2.395167337	0.002147994	0.021721483
8.575428771052178e-06-5	NC_044376.1	14758601	14759799	+	67.0116	1198	Intergenic	Intergenic	18639	LOC115722028	LOC115722028	XM_030651144	uncharacterized WD repeat-containing protein C2A9.03,	protein_coding	0.53003025	1	1	0.619651544	1	1
3.3623987849270652e-12	NC_044370.1	49823801	49827399	+	67.0116	3598	Intergenic	Intergenic	-21775	LOC115721323	LOC115721323	XM_030650597	uncharacterized LOC115721323	protein_coding	0.42574027	1	1	-2.27200243	0.647354272	1
0.00019957375878161743-2	NC_044370.1	61262801	61263599	+	67.0116	798	Intergenic	Intergenic	-61732	LOC115703365	LOC115703365	XR_004009137	small nucleolar RNA R71	snoRNA	NA	NA	NA	NA	NA	NA
2.7723437511354635e-05-3	NC_044375.1	27104401	27105999	+	67.0116	1598	Intergenic	Intergenic	-59690	LOC115719985	LOC115719985	XM_030649154	uncharacterized LOC115719985	protein_coding	NA	NA	NA	NA	NA	NA
8.575428771052178e-06-4	NC_044376.1	6158001	6158999	+	67.0116	998	Intergenic	Intergenic	52603	LOC115723511	LOC115723511	XM_030653007	#N/A	protein_coding	-0.98915432	1	1	0.077102448	1	1
9.970429683063403e-05-2	NC_044375.1	67563001	67563799	+	67.0116	798	Intergenic	Intergenic	8407	LOC115719535	LOC115719535	XM_030648617	protein METHYLENE BLUE SENSITIVITY 1	protein_coding	0.119796076	1	1	-0.164121862	1	1
0.0004901433710946721	NC_044370.1	9487001	9487799	+	67.0116	798	Intergenic	Intergenic	-5436	LOC115705421	LOC115705421	XM_030633132	transcription factor PAR2	protein_coding	NA	NA	NA	NA	NA	NA
0.0004901433710946721-2	NC_044371.1	41476201	41476799	+	67.0116	598	Intergenic	Intergenic	12107	LOC115704041	LOC115704041	XM_030631264	uncharacterized LOC115704041	protein_coding	NA	NA	NA	NA	NA	NA
4.1059382776884646e-05	NC_044375.1	56933801	56934599	+	67.0116	798	Intergenic	Intergenic	38548	LOC115720211	LOC115720211	XM_030649367	#N/A	protein_coding	1.183473783	0.963862446	NA	-1.406735347	0.917537053	NA
0.0010975183639319506-3	NC_044377.1	69146201	69146799	+	67.0116	598	Intergenic	Intergenic	6411	LOC115695788	LOC115695788	XM_030622865	probable DNA helicase MCM9	protein_coding	3.889616888	0.191170519	0.870409968	3.515227277	0.255214338	1
9.970429683063403e-05	NC_044371.1	48849601	48850399	+	67.0116	798	Intergenic	Intergenic	28776	LOC115707266	LOC115707266	XM_030635176	pectinesterase inhibitor 3	protein_coding	1.126086259	0.86458986	1	-0.281861927	1	1
9.453937009864553e-06	NC_044377.1	68902201	68903399	+	67.0116	1198	Intergenic	Intergenic	-13923	LOC115695413	LOC115695413	XM_030622478	uncharacterized LOC115695413	protein_coding	NA	NA	NA	NA	NA	NA
0.00013417738813692345-2	NC_044376.1	27155201	27155999	+	67.0116	798	Intergenic	Intergenic	-5632	LOC115723200	LOC115723200	XM_030652635	pentatricopeptide repeat-containing protein At5g64320, mitochondrial,	protein_coding	0.540674089	1	1	0.090071572	1	1
3.696907020805705e-12	NC_044371.1	1085201	1087999	+	67.0116	2798	Intergenic	Intergenic	10560	LOC115706877	LOC115706877	XR_004009659	uncharacterized LOC115706877	lncRNA	NA	NA	NA	NA	NA	NA
4.674893485373099e-07	NC_044373.1	62500001	62501999	+	67.0116	1998	Intergenic	Intergenic	3717	LOC115713563	LOC115713563	XM_030642048	uncharacterized LOC115713563	protein_coding	NA	NA	NA	NA	NA	NA
3.721642947293214e-05	NC_044372.1	1815801	1816799	+	67.0116	998	intron	-intron (LOC115709523, intron 4 of 4)	6614	LOC115709523	LOC115709523	XM_030637643	small RNA-binding protein 11, chloroplastic-like	protein_coding	0.084353168	1	1	0.032274987	1	1
8.575428771052178e-06-3	NC_044374.1	54432201	54433199	+	67.0116	998	Intergenic	Intergenic	49077	LOC115717852	LOC115717852	XM_030646822	uncharacterized LOC115717852	protein_coding	NA	NA	NA	NA	NA	NA
3.854383921532446e-07	NC_044374.1	76949601	76950999	+	67.0116	1398	Intergenic	Intergenic	599742	LOC115718006	LOC115718006	XM_030646974	uncharacterized LOC115718006	protein_coding	0.410947537	1	NA	0.998328082	1	NA
0.0008104377169570074-3	NC_044379.1	52570401	52570999	+	67.0116	598	Intergenic	Intergenic	-4813	LOC115699691	LOC115699691	XM_030627215	aconitate hydratase, cytoplasmic	protein_coding	-0.883652641	1	1	-0.30086671	1	1
4.2160714096532445e-08	NC_044372.1	69451401	69453399	+	67.0116	1998	Intergenic	Intergenic	226306	LOC115709988	LOC115709988	XM_030638275	protein REVEILLE 8,	protein_coding	-1.028155173	0.900116137	1	0.272255282	1	1
0.00016361433461469245-2	NC_044377.1	7636201	7636999	+	67.0116	798	Intergenic	Intergenic	-34094	LOC115724560	LOC115724560	XR_004013222	uncharacterized LOC115724560	lncRNA	NA	NA	NA	NA	NA	NA
1.0422889699614428e-05	NC_044371.1	65328401	65329599	+	67.0116	1198	Intergenic	Intergenic	-45761	LOC115704243	LOC115704243	XM_030631457	uncharacterized LOC115704243	protein_coding	NA	NA	NA	NA	NA	NA
8.575428771052178e-06-6	NC_044377.1	43519601	43520799	+	67.0116	1198	Intergenic	Intergenic	-459981	LOC115695201	LOC115695201	XM_030622286	uncharacterized LOC115695201	protein_coding	NA	NA	NA	NA	NA	NA
4.998547254621742e-05	NC_044375.1	54255001	54255999	+	67.0116	998	Intergenic	Intergenic	-103962	LOC115720200	LOC115720200	XM_030649356	uncharacterized LOC115720200	protein_coding	NA	NA	NA	NA	NA	NA
0.00024351914235500822-3	NW_022060467.1	29201	29999	+	67.0116	798	Intergenic	Intergenic	-30323	LOC115702165	LOC115702165	XM_030629620	#N/A	protein_coding	1.97274288	0.016051041	0.119608174	-0.535267816	1	1
3.721642947293214e-05-2	NC_044379.1	1747401	1748399	+	67.0116	998	Intergenic	Intergenic	-1041889	LOC115698919	LOC115698919	XM_030626122	extracellular ribonuclease LE	protein_coding	6.151631711	1.47E-17	1.49E-15	3.483828726	2.08E-15	9.58E-14
5.807744026401118e-06	NC_044375.1	49902801	49903799	+	67.0116	998	Intergenic	Intergenic	-13401	LOC115721305	LOC115721305	XM_030650578	uncharacterized LOC115721305,	protein_coding	1.665375374	0.306005275	1	-0.137538955	1	1
0.0010975183639319506	NC_044372.1	18870601	18871199	+	67.0116	598	Intergenic	Intergenic	13006	LOC115711759	LOC115711759	XR_004010636	small nucleolar RNA R71	snoRNA	NA	NA	NA	NA	NA	NA
0.00016361433461469245-3	NC_044378.1	49777201	49777799	+	67.0116	598	Intergenic	Intergenic	-11582	LOC115697491	LOC115697491	XM_030624518	AMP deaminase	protein_coding	-0.177284537	1	1	0.278426196	1	1
6.401670978259248e-06-2	NC_044378.1	53114801	53115999	+	67.0116	1198	Intergenic	Intergenic	-47217	LOC115697749	LOC115697749	XR_004007985	uncharacterized LOC115697749	lncRNA	NA	NA	NA	NA	NA	NA
0.00024351914235500822-2	NC_044375.1	1541001	1541799	+	67.0116	798	Intergenic	Intergenic	-14752	LOC115719159	LOC115719159	XM_030648089	F-box/FBD/LRR-repeat protein At1g78750-like	protein_coding	NA	NA	NA	NA	NA	NA
1.4684611394345875e-08	NC_044370.1	77076801	77079199	+	67.0116	2398	Intergenic	Intergenic	51986	LOC115724963	LOC115724963	XM_030654350	zinc finger BED domain-containing protein RICESLEEPER 2-like	protein_coding	NA	NA	NA	NA	NA	NA
2.0661758034489363e-05	NC_044372.1	48843201	48844599	+	67.0116	1398	Intergenic	Intergenic	26019	LOC115711491	LOC115711491	XM_030639831	probable glycosyltransferase At5g03795,	protein_coding	-0.67373137	1	1	-1.695392434	0.007775461	0.066714749
0.0010975183639319506-2	NC_044374.1	7368001	7368599	+	67.0116	598	Intergenic	Intergenic	-14843	LOC115715893	LOC115715893	XM_030644569	stemmadenine O-acetyltransferase-like	protein_coding	NA	NA	NA	NA	NA	NA
6.401670978259248e-06	NC_044375.1	55723601	55724799	+	67.0116	1198	Intergenic	Intergenic	-17348	LOC115720899	LOC115720899	XM_030650103	hydroxyproline O-arabinosyltransferase 3	protein_coding	0.107409102	1	1	0.229214647	1	1
5.807744026401118e-06-2	NC_044377.1	72423001	72424199	+	67.0116	1198	Intergenic	Intergenic	-21146	LOC115725110	LOC115725110	XM_030654539	methyl-CpG-binding domain-containing protein 11,	protein_coding	0.078431486	1	1	0.353332413	1	1
0.0004901433710946721-3	NW_022060344.1	23001	23799	+	67.0116	798	NA	NA	NA	NA			#N/A		NA	NA	NA	NA	NA	NA
0.0002204445317251728	NC_044376.1	8834401	8835199	+	67.0116	798	Intergenic	Intergenic	-12146	LOC115724386	LOC115724386	XR_004013179	small nucleolar RNA R71	snoRNA	NA	NA	NA	NA	NA	NA
1.115629708201752e-06	NC_044371.1	65685401	65687199	+	67.0116	1798	Intergenic	Intergenic	-26145	LOC115706954	LOC115706954	XM_030634737	ferritin-3, chloroplastic	protein_coding	-2.745267619	2.57E-22	4.02E-20	-0.118127104	1	1
1.115629708201752e-06-2	NC_044374.1	53640001	53641599	+	67.0116	1598	Intergenic	Intergenic	35678	LOC115718260	LOC115718260	XR_004011843	small nucleolar RNA R71	snoRNA	NA	NA	NA	NA	NA	NA
0.0002204445317251728-2	NC_044377.1	28776801	28777599	+	67.0116	798	Intergenic	Intergenic	5900	LOC115695078	LOC115695078	XM_030622172	uncharacterized LOC115695078	protein_coding	NA	NA	NA	NA	NA	NA
0.00016361433461469245	NC_044372.1	67901001	67901799	+	67.0116	798	Intergenic	Intergenic	4978	LOC115711209	LOC115711209	XM_030639535	uncharacterized LOC115711209	protein_coding	0.038365919	1	1	0.204891039	1	1
9.091492812183615e-08	NC_044372.1	54338601	54339999	+	67.0116	1398	Intergenic	Intergenic	-9597	LOC115709004	LOC115709004	XM_030637024	probable calcium-binding protein CML15	protein_coding	4.76690713	0.006653664	0.057536385	3.510835788	0.019880483	0.150893309
2.0661758034489363e-05-3	NC_044376.1	16735601	16736999	+	67.0116	1398	Intergenic	Intergenic	5734	LOC115723616	LOC115723616	XM_030653101	uncharacterized LOC115723616	protein_coding	NA	NA	NA	NA	NA	NA
7.0566161581343876e-06	NC_044375.1	38341601	38342799	+	67.0116	1198	Intergenic	Intergenic	43688	LOC115718644	LOC115718644	XM_030647466	uncharacterized LOC115718644	protein_coding	NA	NA	NA	NA	NA	NA
1.4706166859702075e-07	NC_044379.1	6960801	6962599	+	67.0116	1798	Intergenic	Intergenic	-25563	LOC115699783	LOC115699783	XM_030627328	uncharacterized LOC115699783	protein_coding	NA	NA	NA	NA	NA	NA
0.00054187769863898	NC_044378.1	25721401	25721999	+	67.0116	598	Intergenic	Intergenic	40196	LOC115698019	LOC115698019	XM_030625201	probable LRR receptor-like serine/threonine-protein kinase RFK1,	protein_coding	0.117405878	1	1	-1.033619408	0.827090473	1
0.0006625308805422396	NC_044371.1	59455201	59455799	+	67.0116	598	Intergenic	Intergenic	-44799	LOC115705828	LOC115705828	XM_030633273	3-ketoacyl-CoA synthase 1-like	protein_coding	0.835007935	1	1	1.230322935	0.633890538	1
6.245699663809338e-07	NC_044376.1	16600801	16602199	+	67.0116	1398	Intergenic	Intergenic	41110	LOC115722725	LOC115722725	XR_004012841	uncharacterized LOC115722725	lncRNA	-1.512629836	0.90002605	NA	0	1	NA
0.0008965178083526662	NC_044372.1	15397801	15398399	+	67.0116	598	Intergenic	Intergenic	-77934	LOC115710472	LOC115710472	XM_030638833	uncharacterized LOC115710472	protein_coding	1.167181664	0.936955752	NA	1.107319735	0.957624322	1
2.7723437511354635e-05-4	NC_044375.1	92630001	92630999	+	67.0116	998	Intergenic	Intergenic	-12079	LOC115719708	LOC115719708	XM_030648856	protein transport protein Sec61 subunit beta	protein_coding	2.013000818	1.98E-06	4.47E-05	-0.405100677	1	1
2.0661758034489363e-05-2	NC_044373.1	24733201	24734199	+	67.0116	998	Intergenic	Intergenic	25828	LOC115712977	LOC115712977	XM_030641426	diacylglycerol kinase 2,	protein_coding	0.879228781	1	1	-0.292205753	1	1
0.00024351914235500822	NC_044370.1	45406801	45407599	+	67.0116	798	Intergenic	Intergenic	-29981	LOC115720911	LOC115720911	XM_030650121	serine/threonine-protein kinase TOR-like	protein_coding	NA	NA	NA	NA	NA	NA
2.421939667980887e-06-3	NC_044378.1	52957601	52958799	+	67.0116	1198	Intergenic	Intergenic	105597	LOC115697318	LOC115697318	XM_030624265	ethylene-responsive transcription factor 4	protein_coding	2.28128686	2.10E-07	5.72E-06	0.779576669	1	1
6.245699663809338e-07-2	NC_044378.1	26634401	26635599	+	67.0116	1198	Intergenic	Intergenic	28124	LOC115698047	LOC115698047	XM_030625234	ethylene-responsive transcription factor 12	protein_coding	5.393565693	0.00244609	0.024787134	0.177802809	1	1
0.0006625308805422396-2	NC_044377.1	2184201	2184799	+	67.0116	598	intron	-intron (LOC115724988, intron 1 of 7)	-2042	LOC115724989	LOC115724989	XM_030654379	uncharacterized LOC115724989	protein_coding	NA	NA	NA	NA	NA	NA
0.00059914015949328	NC_044376.1	26002801	26003599	+	67.0116	798	Intergenic	Intergenic	26983	LOC115723709	LOC115723709	XM_030653188	uncharacterized LOC115723709	protein_coding	NA	NA	NA	NA	NA	NA
2.7723437511354635e-05	NC_044371.1	329201	330199	+	67.0116	998	Intergenic	Intergenic	5679	LOC115706091	LOC115706091	XM_030633612	uncharacterized LOC115706091	protein_coding	NA	NA	NA	NA	NA	NA
2.421939667980887e-06	NC_044370.1	13092201	13094199	+	67.0116	1998	Intergenic	Intergenic	-4943	LOC115702343	LOC115702343	XM_030629810	preprotein translocase subunit SCY2, chloroplastic	protein_coding	-0.795930179	1	1	-0.167694745	1	1
4.780642547811538e-06	NC_044371.1	22056801	22058399	+	67.0116	1598	Intergenic	Intergenic	123835	LOC115708437	LOC115708437	XR_004009937	small nucleolar RNA R71	snoRNA	NA	NA	NA	NA	NA	NA
0.00019957375878161743	NC_044370.1	27749001	27749799	+	67.0116	798	intron	-intron (LOC115708781, intron 3 of 4)	-15210	LOC115708763	LOC115708763	XM_030636779	tryptophan aminotransferase-related protein 3	protein_coding	NA	NA	NA	NA	NA	NA
0.00016361433461469245-4	NC_044379.1	23442601	23443599	+	67.0116	998	Intergenic	Intergenic	-67691	LOC115699941	LOC115699941	XM_030627488	uncharacterized LOC115699941	protein_coding	-1.447163648	0.377164703	1	1.898504235	0.153809325	0.827393904
4.780642547811538e-06-2	NC_044377.1	73995001	73996199	+	67.0116	1198	Intergenic	Intergenic	17900	LOC115725094	LOC115725094	XM_030654518	cucumber peeling cupredoxin	protein_coding	0.483597398	1	1	2.083399671	2.97E-07	5.91E-06
0.00013417738813692345	NC_044375.1	45685201	45685999	+	67.0116	798	Intergenic	Intergenic	11341	LOC115720126	LOC115720126	XM_030649287	uncharacterized mitochondrial protein AtMg00860-like	protein_coding	NA	NA	NA	NA	NA	NA
2.421939667980887e-06-2	NC_044374.1	10550401	10551599	+	67.0116	1198	Intergenic	Intergenic	5711	LOC115717553	LOC115717553	XM_030646539	uncharacterized mitochondrial protein AtMg00820-like	protein_coding	NA	NA	NA	NA	NA	NA
1.1491653132094748e-05	NC_044377.1	12760801	12761799	+	67.0116	998	Intergenic	Intergenic	7071	LOC115694988	LOC115694988	XM_030622089	uncharacterized LOC115694988	protein_coding	NA	NA	NA	NA	NA	NA
9.639017953775155e-59	NC_044379.1	3550801	3565999	+	66.7041	15198	exon	-exon (LOC115701760, exon 1 of 1)	2981	LOC115701760	LOC115701760	XR_004008746	28S ribosomal RNA	rRNA	0.781625644	1	1	0.448198064	1	1
1.476451885570177e-13	NC_044377.1	46127801	46131399	+	66.5098	3598	Intergenic	Intergenic	17777	LOC115694812	LOC115694812	XR_004007477	uncharacterized LOC115694812	lncRNA	-1.512629836	0.90002605	NA	0	1	NA
3.698947971517314e-12	NC_044374.1	55965601	55968399	+	66.4425	2798	Intergenic	Intergenic	-30395	LOC115716233	LOC115716233	XM_030644985	probable mediator of RNA polymerase II transcription subunit 37e	protein_coding	-1.225766947	0.40300161	1	-0.782706728	1	1
8.497677948937998e-11	NW_022060487.1	707001	709799	+	66.3574	2798	NA	NA	NA	NA			#N/A		NA	NA	NA	NA	NA	NA
1.243309302434024e-10	NC_044373.1	45589601	45591999	+	66.3453	2398	Intergenic	Intergenic	44971	LOC115713462	LOC115713462	XM_030641945	uncharacterized LOC115713462	protein_coding	NA	NA	NA	NA	NA	NA
4.716407775904188e-10	NC_044374.1	59861201	59864599	+	66.2992	3398	Intergenic	Intergenic	331472	LOC115716857	LOC115716857	XR_004011616	uncharacterized LOC115716857	lncRNA	NA	NA	NA	NA	NA	NA
1.0113644457202127e-09	NC_044372.1	62062801	62065599	+	66.2699	2798	Intergenic	Intergenic	-99281	LOC115711226	LOC115711226	XR_004010435	uncharacterized LOC115711226,	lncRNA	NA	NA	NA	NA	NA	NA
3.180478763197711e-09	NC_044377.1	41061001	41063799	+	66.2211	2798	Intergenic	Intergenic	-34536	LOC115695191	LOC115695191	XM_030622280	uncharacterized LOC115695191	protein_coding	NA	NA	NA	NA	NA	NA
7.520345131337726e-09	NC_044377.1	59283801	59285599	+	66.1801	1798	Intergenic	Intergenic	7614	LOC115724571	LOC115724571	XM_030653882	uncharacterized LOC115724571	protein_coding	0.367489051	1	1	-1.030415808	0.946555767	1
1.2136685010430195e-08-2	NC_044375.1	14037601	14040199	+	66.1554	2598	Intergenic	Intergenic	-12251	LOC115719874	LOC115719874	XM_030649055	uncharacterized LOC115719874	protein_coding	0.437226105	1	NA	1.986379105	0.806642434	NA
1.2136685010430195e-08	NC_044373.1	66500801	66502599	+	66.1554	1798	Intergenic	Intergenic	36483	LOC115712496	LOC115712496	XM_030640781	retrotransposon-like protein 1,	protein_coding	0.284569307	1	1	0.291382827	1	1
1.9594564454283094e-08	NC_044371.1	54417401	54419599	+	66.1293	2198	Intergenic	Intergenic	-492973	LOC115704145	LOC115704145	XM_030631362	uncharacterized LOC115704145	protein_coding	NA	NA	NA	NA	NA	NA
6.822055330729117e-08	NC_044377.1	33530201	33531999	+	66.053	1798	Intergenic	Intergenic	-185929	LOC115695108	LOC115695108	XM_030622198	uncharacterized LOC115695108	protein_coding	NA	NA	NA	NA	NA	NA
7.510137462211141e-08	NC_044374.1	41159601	41161399	+	66.0466	1798	Intergenic	Intergenic	13987	LOC115716815	LOC115716815	XR_004011603	uncharacterized LOC115716815	lncRNA	NA	NA	NA	NA	NA	NA
1.4724026801292067e-07	NC_044372.1	69164001	69165599	+	65.9992	1598	Intergenic	Intergenic	56072	LOC115708737	LOC115708737	XM_030636741	uncharacterized LOC115708737	protein_coding	0.8616693	1	1	0.118043834	1	1
2.1642495609536363e-07	NW_022060514.1	10001	11599	+	65.97	1598	NA	NA	NA	NA			#N/A		NA	NA	NA	NA	NA	NA
2.3831553589507317e-07	NC_044378.1	45573401	45575399	+	65.9624	1998	Intergenic	Intergenic	-2216	LOC115697291	LOC115697291	XM_030624234	ethylene response sensor 1,	protein_coding	-0.331194101	1	1	-1.331358268	0.177700328	0.929712279
3.182359417647259e-07	NW_022060417.1	494801	496999	+	65.939	2198	Intergenic	Intergenic	-40931	LOC115702073	LOC115702073	XR_004008791	#N/A	lncRNA	NA	NA	NA	NA	NA	NA
5.155755916175387e-07	NC_044373.1	6707401	6708399	+	65.8976	998	Intergenic	Intergenic	2600	LOC115713129	LOC115713129	XM_030641615	uncharacterized LOC115713129	protein_coding	NA	NA	NA	NA	NA	NA
5.155755916175387e-07-2	NC_044379.1	3614001	3615599	+	65.8976	1598	Intergenic	Intergenic	50202	LOC115701762	LOC115701762	XR_004008747	28S ribosomal RNA	rRNA	1.374051984	0.564145906	1	1.187118883	0.756031517	1
6.254441452173115e-07	NC_044377.1	11421001	11422399	+	65.8801	1398	Intergenic	Intergenic	82384	LOC115724749	LOC115724749	XM_030654086	uncharacterized LOC115724749,	protein_coding	1.196415169	0.612813481	1	-0.584900594	1	1
9.207118090528605e-07	NC_044374.1	26765001	26767199	+	65.8435	2198	Intergenic	Intergenic	-30708	LOC115717326	LOC115717326	XM_030646298	#N/A	protein_coding	1.032836346	0.945446122	1	3.170353429	3.62E-05	0.00052094
1.0142343746740772e-06	NC_044378.1	45565201	45566799	+	65.8339	1598	Intergenic	Intergenic	-10616	LOC115697291	LOC115697291	XM_030624234	ethylene response sensor 1,	protein_coding	-0.331194101	1	1	-1.331358268	0.177700328	0.929712279
1.813426643013209e-06	NC_044375.1	63435401	63436799	+	65.7733	1398	Intergenic	Intergenic	-37288	LOC115720250	LOC115720250	XM_030649406	uncharacterized LOC115720250	protein_coding	NA	NA	NA	NA	NA	NA
2.425864681869881e-06	NC_044374.1	58533401	58534799	+	65.7405	1398	Intergenic	Intergenic	228975	LOC115715829	LOC115715829	XR_004011449	uncharacterized LOC115715829,	lncRNA	0.500272922	1	1	-0.93764179	1	1
2.425864681869881e-06-2	NC_044377.1	38378001	38379399	+	65.7405	1398	Intergenic	Intergenic	-14122	LOC115724953	LOC115724953	XM_030654336	nudix hydrolase 19, chloroplastic	protein_coding	-0.34325739	1	1	0.806596426	1	1
3.2461254641265694e-06	NC_044371.1	41524201	41526199	+	65.706	1998	Intergenic	Intergenic	-9874	LOC115705547	LOC115705547	XM_030632903	protein TIFY 3B-like	protein_coding	-0.266407027	1	1	0.219396927	1	1
3.2461254641265694e-06-2	NC_044376.1	13359601	13361199	+	65.706	1598	Intergenic	Intergenic	-14098	LOC115723058	LOC115723058	XM_030652464	aspartic proteinase-like protein 2,	protein_coding	0.366794911	1	1	0.15243306	1	1
3.942525989555043e-06-3	NC_044377.1	42895601	42896999	+	65.682	1398	Intergenic	Intergenic	-7327	LOC115695200	LOC115695200	XM_030622285	uncharacterized LOC115695200	protein_coding	NA	NA	NA	NA	NA	NA
3.942525989555043e-06	NC_044373.1	26745201	26746999	+	65.682	1798	Intergenic	Intergenic	17030	LOC115713292	LOC115713292	XM_030641771	uncharacterized LOC115713292	protein_coding	NA	NA	NA	NA	NA	NA
3.942525989555043e-06-2	NC_044377.1	34375601	34376799	+	65.682	1198	Intergenic	Intergenic	-15987	LOC115695112	LOC115695112	XM_030622202	uncharacterized mitochondrial protein AtMg00310-like	protein_coding	NA	NA	NA	NA	NA	NA
3.942525989555043e-06-4	NC_044378.1	25882201	25883399	+	65.682	1198	Intergenic	Intergenic	-34156	LOC115696909	LOC115696909	XM_030623809	inactive tetrahydrocannabinolic acid synthase-like	protein_coding	NA	NA	NA	NA	NA	NA
4.7890321994192074e-06	NC_044372.1	4940001	4941399	+	65.657	1398	Intergenic	Intergenic	-8297	LOC115709023	LOC115709023	XR_004010143	uncharacterized LOC115709023	lncRNA	-0.545086771	1	NA	0.921490471	1	NA
8.591605551108776e-06	NC_044372.1	62224801	62226199	+	65.5761	1398	Intergenic	Intergenic	-249516	LOC115709423	LOC115709423	XM_030637524	dnaJ homolog subfamily C member 16,	protein_coding	0.371549908	1	1	-0.095907037	1	1
9.471994218429421e-06-3	NC_044377.1	25074801	25075999	+	65.5617	1198	Intergenic	Intergenic	-19888	LOC115724736	LOC115724736	XM_030654071	probable serine/threonine-protein kinase PBL23	protein_coding	1.676170491	0.496891571	1	4.79472627	0.001371886	0.014533296
9.471994218429421e-06-4	NC_044378.1	8599401	8600799	+	65.5617	1398	Intergenic	Intergenic	-16968	LOC115696305	LOC115696305	XM_030623212	uncharacterized LOC115696305	protein_coding	NA	NA	NA	NA	NA	NA
9.471994218429421e-06	NC_044376.1	60081001	60083199	+	65.5617	2198	Intergenic	Intergenic	-6793	LOC115722757	LOC115722757	XM_030652061	putative disease resistance protein RGA4	protein_coding	-1.481600014	0.333413283	1	0.095449653	1	1
9.471994218429421e-06-2	NC_044377.1	18636601	18637799	+	65.5617	1198	Intergenic	Intergenic	-5987	LOC115725481	LOC115725481	XM_030655018	truncated FRIGIDA-like protein 1	protein_coding	-0.143473746	1	1	0.101123783	1	1
1.0443049199076079e-05	NC_044374.1	5026801	5028199	+	65.547	1398	exon	-exon (LOC115715631, exon 2 of 4)	-3316	LOC115715632	LOC115715632	XR_004011404	uncharacterized LOC115715632	lncRNA	NA	NA	NA	NA	NA	NA
1.1514163417081382e-05	NC_044377.1	29729001	29730399	+	65.5319	1398	Intergenic	Intergenic	23185	LOC115724533	LOC115724533	XM_030653831	65-kDa microtubule-associated protein 1	protein_coding	0.490257238	1	1	-0.558405259	1	1
1.1514163417081382e-05-2	NC_044377.1	56961001	56962199	+	65.5319	1198	Intergenic	Intergenic	43016	LOC115696010	LOC115696010	XR_004007612	small nucleolar RNA R71	snoRNA	NA	NA	NA	NA	NA	NA
3.582804834243626e-17	NC_044373.1	1032001	1036999	+	65.5281	4998	intron	-intron (LOC115712341, intron 2 of 9)	17072	LOC115712341	LOC115712341	XM_030640615	uncharacterized LOC115712341	protein_coding	-0.544589565	1	1	0.100461255	1	1
1.9637851296193777e-09	NC_044379.1	27827001	27829799	+	65.5088	2798	Intergenic	Intergenic	-7643	LOC115699218	LOC115699218	XM_030626513	uncharacterized LOC115699218	protein_coding	3.151466028	0.036421865	0.23658046	0.944236705	1	1
1.3999144821280327e-05	NC_044376.1	44392001	44393199	+	65.501	1198	Intergenic	Intergenic	-32694	LOC115724264	LOC115724264	XR_004013063	small nucleolar RNA R71	snoRNA	NA	NA	NA	NA	NA	NA
1.5437121860938717e-05	NC_044373.1	25325601	25326799	+	65.485	1198	Intergenic	Intergenic	-19828	LOC115713277	LOC115713277	XM_030641758	uncharacterized LOC115713277	protein_coding	NA	NA	NA	NA	NA	NA
1.5437121860938717e-05-3	NC_044379.1	30173601	30174599	+	65.485	998	Intergenic	Intergenic	7315	LOC115701605	LOC115701605	XR_004008598	small nucleolar RNA R71	snoRNA	NA	NA	NA	NA	NA	NA
1.5437121860938717e-05-2	NC_044376.1	6164201	6165399	+	65.485	1198	Intergenic	Intergenic	58903	LOC115723511	LOC115723511	XM_030653007	#N/A	protein_coding	-0.98915432	1	1	0.077102448	1	1
2.0705550012798617e-05	NC_044375.1	75008401	75009599	+	65.4349	1198	Intergenic	Intergenic	-55457	LOC115720351	LOC115720351	XM_030649504	uncharacterized LOC115720351	protein_coding	NA	NA	NA	NA	NA	NA
2.5188928514143966e-05	NC_044371.1	24365001	24365999	+	65.3997	998	Intergenic	Intergenic	-84533	LOC115703916	LOC115703916	XM_030631151	uncharacterized LOC115703916	protein_coding	NA	NA	NA	NA	NA	NA
2.778467459089522e-05	NC_044374.1	59634001	59635199	+	65.3815	1198	Intergenic	Intergenic	103172	LOC115716857	LOC115716857	XR_004011616	uncharacterized LOC115716857	lncRNA	NA	NA	NA	NA	NA	NA
3.064956760799371e-05	NC_044371.1	23737001	23737599	+	65.3628	598	Intergenic	Intergenic	-19148	LOC115704826	LOC115704826	XM_030632032	uncharacterized LOC115704826	protein_coding	1.287628456	0.705713201	1	-1.78764737	0.229696209	1
3.381172341342581e-05	NC_044375.1	29155201	29156199	+	65.3438	998	Intergenic	Intergenic	-28083	LOC115721333	LOC115721333	XM_030650606	uncharacterized LOC115721333	protein_coding	2.780321329	0.06435253	0.373392298	2.58734407	0.095093427	0.558169427
3.730222181152331e-05	NC_044375.1	51294401	51295799	+	65.3243	1398	Intergenic	Intergenic	78275	LOC115720173	LOC115720173	XM_030649331	uncharacterized LOC115720173	protein_coding	NA	NA	NA	NA	NA	NA
4.115542257092188e-05-2	NC_044379.1	61443801	61444799	+	65.3043	998	Intergenic	Intergenic	29558	LOC115699273	LOC115699273	XM_030626609	uncharacterized LOC115699273	protein_coding	1.101947906	0.855792162	1	-0.523284242	1	1
4.115542257092188e-05	NC_044370.1	99886801	99888199	+	65.3043	1398	Intergenic	Intergenic	-10629	LOC115699831	LOC115699831	XM_030627379	uncharacterized LOC115699831	protein_coding	-0.547203574	1	1	0.71976673	1	1
1.9493438452313826e-08	NC_044377.1	24827401	24829199	+	65.2941	1798	Intergenic	Intergenic	40952	LOC115695060	LOC115695060	XM_030622157	uncharacterized LOC115695060	protein_coding	NA	NA	NA	NA	NA	NA
4.540931560501729e-05	NC_044373.1	1519201	1520399	+	65.2839	1198	Intergenic	Intergenic	5105	LOC115712418	LOC115712418	XM_030640692	uncharacterized LOC115712418	protein_coding	NA	NA	NA	NA	NA	NA
4.540931560501729e-05-2	NC_044377.1	76055001	76055999	+	65.2839	998	Intergenic	Intergenic	-7622	LOC115695900	LOC115695900	XM_030623001	uncharacterized LOC115695900	protein_coding	0.882708117	1	1	-0.751833941	1	1
2.3611684358267635e-08	NC_044370.1	74113201	74116799	+	65.2734	3598	Intergenic	Intergenic	166689	LOC115714390	LOC115714390	XM_030643079	uncharacterized LOC115714390	protein_coding	NA	NA	NA	NA	NA	NA
5.529165968746458e-05-2	NC_044375.1	64375001	64376399	+	65.2414	1398	Intergenic	Intergenic	8262	LOC115718790	LOC115718790	XM_030647615	sulfite reductase [ferredoxin], chloroplastic	protein_coding	-1.465521297	0.002456922	0.024870676	-0.59049023	1	1
5.529165968746458e-05	NC_044373.1	55677001	55678199	+	65.2414	1198	Intergenic	Intergenic	-4079	LOC115715354	LOC115715354	XR_004011230	small nucleolar RNA R71	snoRNA	NA	NA	NA	NA	NA	NA
6.1017949588358624e-05-2	NC_044374.1	37406001	37407599	+	65.2195	1598	intron	-intron (LOC115717726, intron 2 of 2)	4975	LOC115717726	LOC115717726	XM_030646706	uncharacterized LOC115717726	protein_coding	NA	NA	NA	NA	NA	NA
6.1017949588358624e-05	NC_044371.1	54735001	54735999	+	65.2195	998	Intergenic	Intergenic	-175973	LOC115704145	LOC115704145	XM_030631362	uncharacterized LOC115704145	protein_coding	NA	NA	NA	NA	NA	NA
6.734161546971808e-05-2	NC_044375.1	63267401	63268399	+	65.1969	998	Intergenic	Intergenic	-10662	LOC115718848	LOC115718848	XR_004012063	uncharacterized LOC115718848	lncRNA	-2.541991063	0.01176214	0.092074941	2.288811809	0.143495988	0.783756241
6.734161546971808e-05	NC_044372.1	77298801	77299799	+	65.1969	998	Intergenic	Intergenic	-2091	LOC115708748	LOC115708748	XR_004010068	uncharacterized LOC115708748	lncRNA	-0.55084115	1	NA	0.998320075	1	NA
8.203927893367988e-05-2	NC_044376.1	43363401	43364399	+	65.1501	998	Intergenic	Intergenic	87793	LOC115722561	LOC115722561	XM_030651802	uncharacterized LOC115722561	protein_coding	0.036571188	1	1	0.210854242	1	1
8.203927893367988e-05	NC_044372.1	51488601	51489599	+	65.1501	998	Intergenic	Intergenic	142316	LOC115710755	LOC115710755	XM_030639108	uncharacterized LOC115710755	protein_coding	NA	NA	NA	NA	NA	NA
3.511303884309553e-52	NC_044374.1	87147401	87160799	+	65.1358	13398	Intergenic	Intergenic	-11048	LOC115715698	LOC115715698	XM_030644362	subtilisin-like protease SBT1.7	protein_coding	0	1	NA	-2.421170472	0.722007346	NA
9.055983100268078e-05	NC_044374.1	38866001	38866799	+	65.1257	798	Intergenic	Intergenic	17781	LOC115716892	LOC115716892	XM_030645806	phosphatidylinositol glycan anchor biosynthesis class U protein,	protein_coding	-0.402620799	1	1	-0.631078993	1	1
9.055983100268078e-05-2	NC_044377.1	67219801	67220599	+	65.1257	798	Intergenic	Intergenic	23553	LOC115695401	LOC115695401	XM_030622465	uncharacterized LOC115695401	protein_coding	NA	NA	NA	NA	NA	NA
9.997239190845924e-05-2	NC_044373.1	43361401	43362399	+	65.1008	998	Intergenic	Intergenic	115907	LOC115713438	LOC115713438	XM_030641921	uncharacterized LOC115713438	protein_coding	0	1	NA	-0.925217262	1	NA
9.997239190845924e-05	NC_044372.1	27424001	27424799	+	65.1008	798	Intergenic	Intergenic	-44845	LOC115709941	LOC115709941	XM_030638208	DNA annealing helicase and endonuclease ZRANB3,	protein_coding	-0.343655669	1	1	-0.539881024	1	1
9.997239190845924e-05-3	NC_044375.1	33582801	33583599	+	65.1008	798	Intergenic	Intergenic	-36991	LOC115719735	LOC115719735	XM_030648910	probable UDP-N-acetylglucosamine--peptide N-acetylglucosaminyltransferase SEC,	protein_coding	0.297134269	1	1	0.358410072	1	1
9.963304810058292e-08	NC_044372.1	68994001	68995599	+	65.1008	1598	Intergenic	Intergenic	13388	LOC115710886	LOC115710886	XM_030639238	uncharacterized LOC115710886	protein_coding	NA	NA	NA	NA	NA	NA
0.00011037126802671998	NC_044374.1	77584401	77585199	+	65.0751	798	Intergenic	Intergenic	-34758	LOC115718006	LOC115718006	XM_030646974	uncharacterized LOC115718006	protein_coding	0.410947537	1	NA	0.998328082	1	NA
0.00012186085976359893-4	NC_044377.1	35174401	35175199	+	65.0488	798	Intergenic	Intergenic	-14112	LOC115695122	LOC115695122	XM_030622213	uncharacterized LOC115695122	protein_coding	NA	NA	NA	NA	NA	NA
0.00012186085976359893	NC_044372.1	29701801	29702599	+	65.0488	798	Intergenic	Intergenic	12604	LOC115710595	LOC115710595	XM_030638953	uncharacterized LOC115710595	protein_coding	2.174455055	0.767885573	NA	2.761820919	0.657943093	NA
0.00012186085976359893-3	NC_044374.1	74114801	74115799	+	65.0488	998	Intergenic	Intergenic	20888	LOC115716281	LOC115716281	XM_030645042	protein NRT1/ PTR FAMILY 6.3	protein_coding	-1.826401064	0.127528966	0.639074377	2.772436373	0.001212552	0.013056211
0.00012186085976359893-2	NC_044374.1	41032601	41033599	+	65.0488	998	Intergenic	Intergenic	-23577	LOC115716718	LOC115716718	XM_030645594	uncharacterized LOC115716718	protein_coding	-1.397375927	0.846161153	1	-1.245376921	0.903424227	1
0.00013455675901279156	NC_044371.1	51728401	51729199	+	65.0217	798	Intergenic	Intergenic	135503	LOC115705418	LOC115705418	XR_004009460	uncharacterized LOC115705418	lncRNA	NA	NA	NA	NA	NA	NA
2.891658571753278e-10	NC_044376.1	13622601	13624999	+	65.0125	2398	Intergenic	Intergenic	36659	LOC115724394	LOC115724394	XR_004013187	small nucleolar RNA R71	snoRNA	NA	NA	NA	NA	NA	NA
3.180477115338959e-10	NW_022060476.1	931001	933599	+	65.0032	2598	Intergenic	Intergenic	200500	LOC115702188	LOC115702188	XM_030629636	#N/A	protein_coding	NA	NA	NA	NA	NA	NA
0.0001485869683596548-2	NC_044373.1	28717201	28717999	+	64.9939	798	Intergenic	Intergenic	280591	LOC115714558	LOC115714558	XM_030643293	pentatricopeptide repeat-containing protein At1g28690, mitochondrial	protein_coding	0.251417908	1	1	-0.374895641	1	1
0.0001485869683596548	NC_044371.1	44406601	44407399	+	64.9939	798	Intergenic	Intergenic	-22321	LOC115706139	LOC115706139	XM_030633675	protein SMG9-like	protein_coding	-0.126543453	1	1	-0.263484235	1	1
0.0001485869683596548-4	NC_044377.1	58727801	58728599	+	64.9939	798	Intergenic	Intergenic	-62839	LOC115695305	LOC115695305	XM_030622380	uncharacterized LOC115695305	protein_coding	NA	NA	NA	NA	NA	NA
0.0001485869683596548-3	NC_044373.1	57298801	57299599	+	64.9939	798	Intergenic	Intergenic	139432	LOC115714827	LOC115714827	XR_004011126	uncharacterized LOC115714827	lncRNA	NA	NA	NA	NA	NA	NA
0.00016409325589648822-2	NC_044374.1	55028801	55029599	+	64.9652	798	Intergenic	Intergenic	-60768	LOC115717856	LOC115717856	XM_030646825	uncharacterized LOC115717856	protein_coding	NA	NA	NA	NA	NA	NA
0.00016409325589648822-3	NC_044374.1	57965001	57965799	+	64.9652	798	Intergenic	Intergenic	-5044	LOC115717867	LOC115717867	XM_030646838	uncharacterized LOC115717867	protein_coding	NA	NA	NA	NA	NA	NA
0.00016409325589648822	NC_044373.1	62560801	62561599	+	64.9652	798	Intergenic	Intergenic	-6855	LOC115712716	LOC115712716	XR_004010928	uncharacterized LOC115712716	lncRNA	NA	NA	NA	NA	NA	NA
6.194922778368852e-10	NW_022060514.1	44801	46999	+	64.9358	2198	NA	NA	NA	NA			#N/A		NA	NA	NA	NA	NA	NA
0.0001812326611467894	NC_044374.1	29801601	29802399	+	64.9358	798	Intergenic	Intergenic	-31261	LOC115715598	LOC115715598	XM_030644242	COBW domain-containing protein 1	protein_coding	0.125700225	1	1	-0.976105201	1	1
0.00020017916943120006-2	NC_044375.1	25284801	25285799	+	64.9055	998	Intergenic	Intergenic	-17847	LOC115719972	LOC115719972	XM_030649141	transcription factor MYB87-like	protein_coding	1.2634132	0.94803931	NA	1.850786648	0.833284852	NA
0.00020017916943120006-3	NC_044375.1	82473401	82474199	+	64.9055	798	Intergenic	Intergenic	11917	LOC115720409	LOC115720409	XM_030649559	uncharacterized LOC115720409	protein_coding	-1.478377768	0.852141804	NA	-1.873797843	0.723232856	1
3.8351882216587393e-07	NC_044377.1	29668201	29670599	+	64.9055	2398	Intergenic	Intergenic	-7079	LOC115725140	LOC115725140	XM_030654569	indole-3-acetate O-methyltransferase 1	protein_coding	2.132869061	0.48836389	1	2.227172299	0.425986416	1
0.00020017916943120006-5	NC_044377.1	41616201	41616999	+	64.9055	798	Intergenic	Intergenic	50372	LOC115695192	LOC115695192	XM_030622281	uncharacterized LOC115695192	protein_coding	-0.805043555	1	1	-0.99954429	1	1
0.00020017916943120006-4	NC_044377.1	38834801	38835599	+	64.9055	798	Intergenic	Intergenic	-60766	LOC115724454	LOC115724454	XM_030653742	probable ethanolamine kinase	protein_coding	-0.464414925	1	1	0.638282992	1	1
0.00020017916943120006	NC_044371.1	57539801	57540599	+	64.9055	798	Intergenic	Intergenic	-31859	LOC115705685	LOC115705685	XM_030633083	protein MID1-COMPLEMENTING ACTIVITY 1,	protein_coding	1.174711222	0.763697395	1	-1.103640782	0.820621476	1
9.976867218157962e-10	NC_044378.1	47404401	47406399	+	64.8848	1998	Intergenic	Intergenic	60223	LOC115696613	LOC115696613	XM_030623507	uncharacterized LOC115696613	protein_coding	NA	NA	NA	NA	NA	NA
0.00022112557407029255	NC_044370.1	16588001	16588799	+	64.8743	798	Intergenic	Intergenic	11174	LOC115704756	LOC115704756	XM_030631963	synaptotagmin-1	protein_coding	0.151610056	1	1	0.069302147	1	1
0.00022112557407029255-2	NC_044379.1	26082601	26083399	+	64.8743	798	Intergenic	Intergenic	-24816	LOC115698849	LOC115698849	XM_030626050	probable L-type lectin-domain containing receptor kinase S.5	protein_coding	-1.884683159	NA	NA	-2.638750921	NA	NA
8.410424266997384e-15	NW_022060476.1	374401	378199	+	64.8615	3798	Intergenic	Intergenic	-355500	LOC115702188	LOC115702188	XM_030629636	#N/A	protein_coding	NA	NA	NA	NA	NA	NA
1.460999458708655e-09	NC_044378.1	11156201	11157599	+	64.8421	1398	Intergenic	Intergenic	7475	LOC115698069	LOC115698069	XM_030625251	probable glutathione S-transferase	protein_coding	1.522691687	0.515781001	1	1.721462577	0.368710607	1
1.3483683196246246e-14	NC_044372.1	62242601	62246399	+	64.829	3798	Intergenic	Intergenic	-230516	LOC115709423	LOC115709423	XM_030637524	dnaJ homolog subfamily C member 16,	protein_coding	0.371549908	1	1	-0.095907037	1	1
6.84356858653e-07	NC_044373.1	67985201	67987599	+	64.809	2398	Intergenic	Intergenic	17355	LOC115713034	LOC115713034	XM_030641508	RING-H2 finger protein ATL52	protein_coding	-0.404955491	1	1	-0.049367648	1	1
0.00026989595009928346	NW_022060487.1	464801	465599	+	64.809	798	NA	NA	NA	NA			#N/A		NA	NA	NA	NA	NA	NA
5.815998717503722e-12	NC_044371.1	43735401	43738799	+	64.809	3398	Intergenic	Intergenic	30721	LOC115704065	LOC115704065	XM_030631287	uncharacterized LOC115704065	protein_coding	NA	NA	NA	NA	NA	NA
0.00029821939057832664-8	NW_022060454.1	337401	338199	+	64.7749	798	Intergenic	Intergenic	-166358	LOC115702127	LOC115702127	XM_030629586	#N/A	protein_coding	-1.078418672	0.906335909	1	0.136444746	1	1
0.00029821939057832664-5	NC_044377.1	28372601	28373199	+	64.7749	598	Intergenic	Intergenic	137506	LOC115695075	LOC115695075	XM_030622169	uncharacterized LOC115695075	protein_coding	NA	NA	NA	NA	NA	NA
0.00029821939057832664-4	NC_044374.1	11855001	11855799	+	64.7749	798	Intergenic	Intergenic	9948	LOC115717562	LOC115717562	XM_030646547	phosphate transporter PHO1 homolog 10-like	protein_coding	-2.488102909	0.697743533	NA	0.998308366	1	NA
0.00029821939057832664	NC_044371.1	46803401	46803999	+	64.7749	598	Intergenic	Intergenic	9514	LOC115704999	LOC115704999	XM_030632227	receptor-like protein EIX2	protein_coding	-1.438792588	0.807621276	1	-6.232103932	0.000454608	0.005349615
0.00029821939057832664-7	NC_044379.1	1877201	1877999	+	64.7749	798	Intergenic	Intergenic	-912189	LOC115698919	LOC115698919	XM_030626122	extracellular ribonuclease LE	protein_coding	6.151631711	1.47E-17	1.49E-15	3.483828726	2.08E-15	9.58E-14
0.00029821939057832664-2	NC_044372.1	20284201	20284999	+	64.7749	798	Intergenic	Intergenic	14384	LOC115710522	LOC115710522	XM_030638885	uncharacterized LOC115710522	protein_coding	NA	NA	NA	NA	NA	NA
0.00029821939057832664-6	NC_044378.1	21938801	21939599	+	64.7749	798	Intergenic	Intergenic	50581	LOC115697125	LOC115697125	XR_004007889	uncharacterized LOC115697125	lncRNA	-1.708169953	0.776082795	1	-1.519203454	0.834030055	1
0.00029821939057832664-3	NC_044373.1	35820001	35820799	+	64.7749	798	Intergenic	Intergenic	-5887	LOC115712711	LOC115712711	XM_030641049	protein FREE1,	protein_coding	0.325677234	1	1	0.158137363	1	1
0.00032954709087901907-3	NC_044379.1	2954201	2954999	+	64.7396	798	Intergenic	Intergenic	-15447	LOC115701604	LOC115701604	XR_004008597	small nucleolar RNA R71	snoRNA	NA	NA	NA	NA	NA	NA
0.00032954709087901907-2	NC_044378.1	34928201	34928999	+	64.7396	798	Intergenic	Intergenic	55805	LOC115696522	LOC115696522	XM_030623420	uncharacterized LOC115696522	protein_coding	NA	NA	NA	NA	NA	NA
0.00032954709087901907	NC_044374.1	69488401	69489399	+	64.7396	998	Intergenic	Intergenic	-22537	LOC115718333	LOC115718333	XR_004011912	small nucleolar RNA R71	snoRNA	NA	NA	NA	NA	NA	NA
0.00036420206755043627	NC_044374.1	41518801	41519599	+	64.7033	798	Intergenic	Intergenic	-48158	LOC115716678	LOC115716678	XM_030645530	#N/A	protein_coding	1.18742956	0.257346226	1	0.235594073	1	1
1.346561792353809e-06	NC_044378.1	59668201	59669599	+	64.6847	1398	Intergenic	Intergenic	58729	LOC115697359	LOC115697359	XM_030624333	serine/threonine-protein kinase 38-like,	protein_coding	-0.273602831	1	1	-0.115718511	1	1
1.4834344145821746e-06	NC_044375.1	89713201	89714999	+	64.6658	1798	Intergenic	Intergenic	-7390	LOC115720476	LOC115720476	XM_030649625	uncharacterized LOC115720476	protein_coding	NA	NA	NA	NA	NA	NA
0.0004025426815771904-3	NW_022060454.1	1086401	1087199	+	64.6658	798	Intergenic	Intergenic	-415392	LOC115702125	LOC115702125	XM_030629583	#N/A	protein_coding	2.642988593	0.003486277	0.033308503	3.285318001	4.97E-05	0.000699547
0.0004025426815771904	NC_044370.1	15665001	15665799	+	64.6658	798	promoter-TSS	-promoter-TSS (LOC115703356)	-1912	LOC115703356	LOC115703356	XR_004009128	small nucleolar RNA R71	snoRNA	NA	NA	NA	NA	NA	NA
0.0004025426815771904-2	NC_044375.1	44099801	44100599	+	64.6658	798	Intergenic	Intergenic	21479	LOC115720935	LOC115720935	XM_030650147	LOB domain-containing protein 12	protein_coding	-1.055144667	0.984093075	NA	2.432708214	0.623781174	1
0.00044496659552751747	NC_044376.1	21043801	21044599	+	64.627	798	Intergenic	Intergenic	-70702	LOC115723073	LOC115723073	XM_030652482	elongator complex protein 5	protein_coding	0.014490357	1	1	-0.611221122	1	1
1.8004954636581324e-06	NC_044375.1	72348001	72349999	+	64.627	1998	Intergenic	Intergenic	-101977	LOC115718551	LOC115718551	XM_030647352	ankyrin repeat-containing protein ITN1-like,	protein_coding	NA	NA	NA	NA	NA	NA
0.00044496659552751747-2	NC_044378.1	58038201	58038799	+	64.627	598	Intergenic	Intergenic	-27805	LOC115697945	LOC115697945	XM_030625122	probable small nuclear ribonucleoprotein F	protein_coding	0.175863994	1	1	-0.170872022	1	1
8.968178119522776e-09	NC_044370.1	70492201	70494199	+	64.6138	1998	exon	-exon (LOC115723794, exon 2 of 3)	654	LOC115723794	LOC115723794	XM_030653266	uncharacterized LOC115723794	protein_coding	0.410947537	1	NA	0.998328082	1	NA
8.968178119522776e-09-2	NC_044376.1	45610801	45614199	+	64.6138	3398	Intergenic	Intergenic	-16413	LOC115723858	LOC115723858	XM_030653323	heavy metal-associated isoprenylated plant protein 37-like	protein_coding	-3.274435758	0.333728628	1	-0.759533048	1	1
1.9836912195776085e-06	NC_044372.1	55417201	55418799	+	64.6071	1598	Intergenic	Intergenic	74883	LOC115711885	LOC115711885	XR_004010751	small nucleolar RNA R71	snoRNA	NA	NA	NA	NA	NA	NA
0.000491915187413182-4	NC_044375.1	90016001	90016799	+	64.5869	798	Intergenic	Intergenic	-2404	LOC115720480	LOC115720480	XM_030649629	B3 domain-containing protein At2g33720-like	protein_coding	0.410947537	1	NA	0.998328082	1	NA
0.000491915187413182-5	NC_044376.1	24805801	24806399	+	64.5869	598	TTS	-TTS (LOC115723212)	-6770	LOC115721772	LOC115721772	XM_030650846	telomerase reverse transcriptase	protein_coding	0.524925765	1	1	-0.563722745	1	1
0.000491915187413182-2	NC_044375.1	28128001	28128799	+	64.5869	798	Intergenic	Intergenic	9681	LOC115719998	LOC115719998	XM_030649167	uncharacterized LOC115719998	protein_coding	0	1	NA	-0.925217262	1	NA
1.0858797033434872e-08	NC_044377.1	73217601	73219999	+	64.5869	2398	Intergenic	Intergenic	-26997	LOC115695473	LOC115695473	XM_030622536	uncharacterized LOC115695473	protein_coding	NA	NA	NA	NA	NA	NA
0.000491915187413182-3	NC_044375.1	82469201	82469799	+	64.5869	598	Intergenic	Intergenic	-9876	LOC115720408	LOC115720408	XM_030649558	uncharacterized LOC115720408	protein_coding	NA	NA	NA	NA	NA	NA
0.000491915187413182	NC_044371.1	31030601	31031199	+	64.5869	598	Intergenic	Intergenic	-11420	LOC115705463	LOC115705463	XM_030632799	nuclear-pore anchor,	protein_coding	-0.077486506	1	1	-0.117007522	1	1
2.1855958900291566e-06	NC_044373.1	14725801	14727199	+	64.5869	1398	intron	-intron (LOC115713186, intron 1 of 2)	402	LOC115713186	LOC115713186	XM_030641670	uncharacterized LOC115713186	protein_coding	NA	NA	NA	NA	NA	NA
0.0005438784761483542-3	NC_044378.1	29694601	29695599	+	64.5454	998	Intergenic	Intergenic	-58222	LOC115696884	LOC115696884	XM_030623772	cannabidiolic acid synthase-like 1	protein_coding	9.596601091	2.51E-12	1.38E-10	7.35905879	2.58E-15	1.17E-13
0.0005438784761483542	NC_044375.1	82471001	82471599	+	64.5454	598	Intergenic	Intergenic	-11676	LOC115720408	LOC115720408	XM_030649558	uncharacterized LOC115720408	protein_coding	NA	NA	NA	NA	NA	NA
0.0005438784761483542-2	NC_044376.1	51119401	51119999	+	64.5454	598	Intergenic	Intergenic	-77031	LOC115723899	LOC115723899	XM_030653362	uncharacterized LOC115723899	protein_coding	NA	NA	NA	NA	NA	NA
2.653405452106998e-06	NC_044372.1	15964601	15965999	+	64.5454	1398	Intergenic	Intergenic	6220	LOC115711247	LOC115711247	XM_030639578	heavy metal-associated isoprenylated plant protein 2	protein_coding	2.235159363	0.756083543	NA	2.822524721	0.646700373	NA
2.653405452106998e-06-2	NC_044373.1	29860601	29861999	+	64.5454	1398	intron	-intron (LOC115713314, intron 1 of 2)	8210	LOC115713314	LOC115713314	XM_030641793	uncharacterized LOC115713314	protein_coding	NA	NA	NA	NA	NA	NA
1.592261128376975e-08	NC_044373.1	77641201	77643199	+	64.5313	1998	Intergenic	Intergenic	10272	LOC115714065	LOC115714065	XM_030642598	60S ribosomal protein L19-3	protein_coding	-0.747122565	1	1	-0.930759048	1	1
1.7522215745152935e-08	NC_044379.1	19770201	19772799	+	64.517	2598	Intergenic	Intergenic	-12342	LOC115698820	LOC115698820	XM_030626011	ubiquitin carboxyl-terminal hydrolase 5,	protein_coding	0.328822072	1	1	0.233172224	1	1
1.9282819555070696e-08	NC_044375.1	64712601	64714799	+	64.5026	2198	Intergenic	Intergenic	33954	LOC115718474	LOC115718474	XM_030647260	uncharacterized LOC115718474,	protein_coding	0.02199611	1	1	2.408291965	4.54E-05	0.000644355
3.550284627636247e-06	NC_044374.1	20829001	20830199	+	64.4805	1198	Intergenic	Intergenic	19508	LOC115718335	LOC115718335	XR_004011914	small nucleolar RNA R71	snoRNA	NA	NA	NA	NA	NA	NA
4.31166526324089e-06	NC_044370.1	49740201	49741799	+	64.4353	1598	Intergenic	Intergenic	-80955	LOC115711897	LOC115711897	XM_030640111	outer envelope pore protein 21, chloroplastic	protein_coding	-0.881780829	1	1	-0.309245115	1	1
4.31166526324089e-06-2	NC_044375.1	63969801	63970999	+	64.4353	1198	Intergenic	Intergenic	-17766	LOC115720252	LOC115720252	XM_030649408	uncharacterized LOC115720252	protein_coding	NA	NA	NA	NA	NA	NA
4.75181359869805e-06	NC_044373.1	14645201	14646599	+	64.4121	1398	Intergenic	Intergenic	18232	LOC115714571	LOC115714571	XM_030643312	coatomer subunit gamma	protein_coding	-0.286725475	1	1	-0.629020387	1	1
0.0007356063842267195-3	NC_044374.1	11079601	11080199	+	64.4121	598	Intergenic	Intergenic	3700	LOC115717559	LOC115717559	XM_030646544	uncharacterized LOC115717559	protein_coding	0.410947537	1	NA	0.998328082	1	NA
0.0007356063842267195-4	NC_044379.1	45577001	45577799	+	64.4121	798	Intergenic	Intergenic	-229381	LOC115698951	LOC115698951	XM_030626160	protein no-on-transient A	protein_coding	-0.237901854	1	1	0.147487465	1	1
0.0007356063842267195-2	NC_044373.1	5816601	5817199	+	64.4121	598	Intergenic	Intergenic	-5826	LOC115712763	LOC115712763	XM_030641116	uncharacterized LOC115712763	protein_coding	3.379869612	0.055089157	0.330105632	-0.543962114	1	1
0.0007356063842267195	NC_044372.1	58806601	58807399	+	64.4121	798	Intergenic	Intergenic	-30784	LOC115708719	LOC115708719	XM_030636718	transcription factor BEE 3	protein_coding	-0.721252124	1	1	-1.69066609	0.41152286	1
0.0007356063842267195-5	NW_022060476.1	3001	3599	+	64.4121	598	Intergenic	Intergenic	-728500	LOC115702188	LOC115702188	XM_030629636	#N/A	protein_coding	NA	NA	NA	NA	NA	NA
4.75181359869805e-06-2	NC_044377.1	54929601	54931399	+	64.4121	1798	Intergenic	Intergenic	39238	LOC115695806	LOC115695806	XM_030622890	nucleotide-sugar uncharacterized transporter 1	protein_coding	0.165587101	1	1	-0.266879573	1	1
5.237086348024104e-06	NC_044378.1	57118201	57119599	+	64.3885	1398	Intergenic	Intergenic	-41644	LOC115696676	LOC115696676	XM_030623565	uncharacterized LOC115696676	protein_coding	NA	NA	NA	NA	NA	NA
5.237086348024104e-06-2	NC_044379.1	11722601	11724399	+	64.3885	1798	Intergenic	Intergenic	-12703	LOC115698716	LOC115698716	XM_030625861	uncharacterized LOC115698716	protein_coding	-1.462344291	0.09322406	0.499177186	2.209836508	1.48E-05	0.000225784
6.3620851544265994e-06	NC_044370.1	66474001	66475199	+	64.3399	1198	Intergenic	Intergenic	52019	LOC115723499	LOC115723499	XM_030652998	uncharacterized LOC115723499	protein_coding	NA	NA	NA	NA	NA	NA
5.052537596910325e-10	NC_044377.1	48907601	48910199	+	64.3275	2598	Intergenic	Intergenic	19068	LOC115695979	LOC115695979	XM_030623095	DNA-directed RNA polymerases II, IV and V subunit 12	protein_coding	-0.13757748	1	1	-0.648390994	1	1
0.0009002207164168746-3	NC_044375.1	36461401	36461999	+	64.3149	598	Intergenic	Intergenic	-18328	LOC115719229	LOC115719229	XM_030648183	uncharacterized LOC115719229	protein_coding	-0.115865682	1	1	-0.073956517	1	1
7.012606427771918e-06	NC_044377.1	47411201	47413399	+	64.3149	2198	intron	-intron (LOC115695832, intron 7 of 18)	6335	LOC115695832	LOC115695832	XM_030622920	protein ENHANCED DOWNY MILDEW 2,	protein_coding	-0.530286582	1	1	-0.270252664	1	1
0.0009002207164168746-2	NC_044375.1	23912401	23912999	+	64.3149	598	Intergenic	Intergenic	26305	LOC115720897	LOC115720897	XM_030650101	ubiquitin recognition factor in ER-associated degradation protein 1	protein_coding	-1.558915548	0.101748945	0.536162274	-0.130947172	1	1
0.0009002207164168746	NC_044374.1	11005801	11006399	+	64.3149	598	Intergenic	Intergenic	-70100	LOC115717559	LOC115717559	XM_030646544	uncharacterized LOC115717559	protein_coding	0.410947537	1	NA	0.998328082	1	NA
6.704776006177474e-08	NC_044378.1	24809401	24811199	+	64.298	1798	Intergenic	Intergenic	121689	LOC115698279	LOC115698279	XM_030625490	uncharacterized LOC115698279	protein_coding	NA	NA	NA	NA	NA	NA
7.729948476178909e-06	NC_044371.1	65394601	65395999	+	64.2895	1398	Intergenic	Intergenic	-7339	LOC115705110	LOC115705110	XM_030632351	LOB domain-containing protein 12-like	protein_coding	NA	NA	NA	NA	NA	NA
0.0009960673747404713	NW_022060480.1	74801	75399	+	64.2636	598	Intergenic	Intergenic	40101	LOC115702194	LOC115702194	XM_030629643	#N/A	protein_coding	-0.224877575	1	1	-1.946781814	1.66E-05	0.000251365
8.521012266881525e-06	NC_044371.1	29241001	29242399	+	64.2636	1398	Intergenic	Intergenic	38529	LOC115706025	LOC115706025	XM_030633523	uncharacterized LOC115706025	protein_coding	2.393984341	0.003940023	0.03719045	3.115107961	1.45E-05	0.00022243
8.521012266881525e-06-2	NC_044374.1	63063601	63064799	+	64.2636	1198	Intergenic	Intergenic	5960	LOC115716835	LOC115716835	XR_004011609	uncharacterized LOC115716835	lncRNA	NA	NA	NA	NA	NA	NA
8.942606991387909e-08	NC_044370.1	74506601	74508199	+	64.246	1598	Intergenic	Intergenic	-11908	LOC115714431	LOC115714431	XM_030643149	cytochrome P450 81Q32,	protein_coding	1.715017736	0.62759098	1	5.145005009	0.017327673	0.133877066
9.393416082486656e-06	NC_044370.1	61062801	61063999	+	64.2372	1198	Intergenic	Intergenic	-44427	LOC115703384	LOC115703384	XR_004009152	U6 spliceosomal RNA	snRNA	NA	NA	NA	NA	NA	NA
1.1416762298937653e-05-2	NC_044372.1	8630001	8631399	+	64.1827	1398	Intergenic	Intergenic	-6516	LOC115709139	LOC115709139	XM_030637174	carbonic anhydrase 2	protein_coding	0.410947537	1	NA	0.998328082	1	NA
1.1416762298937653e-05	NC_044371.1	24201601	24202399	+	64.1827	798	Intergenic	Intergenic	-61640	LOC115703915	LOC115703915	XM_030631150	uncharacterized LOC115703915	protein_coding	NA	NA	NA	NA	NA	NA
1.258724470979488e-05	NC_044374.1	40949201	40950399	+	64.1547	1198	Intergenic	Intergenic	-65744	LOC115717759	LOC115717759	XM_030646735	uncharacterized LOC115717759	protein_coding	NA	NA	NA	NA	NA	NA
0.0012199848496243068	NC_044370.1	5745401	5745999	+	64.1547	598	intron	-intron (LOC115706011, intron 1 of 2)	784	LOC115706011	LOC115706011	XR_004009558	uncharacterized LOC115706011	lncRNA	NA	NA	NA	NA	NA	NA
0.0012199848496243068-2	NC_044377.1	76148001	76148599	+	64.1547	598	Intergenic	Intergenic	-52157	LOC115695886	LOC115695886	XM_030622985	uncharacterized LOC115695886	protein_coding	1.192365953	0.491816616	1	1.152704415	0.584433847	1
2.3765705805885582e-11	NC_044378.1	43435001	43439599	+	64.1434	4598	Intergenic	Intergenic	4788	LOC115696588	LOC115696588	XM_030623481	uncharacterized LOC115696588	protein_coding	NA	NA	NA	NA	NA	NA
2.1095348302522848e-09	NC_044372.1	94667801	94670599	+	64.1262	2798	Intergenic	Intergenic	17085	LOC115711655	LOC115711655	XM_030640027	probable folate-biopterin transporter 4	protein_coding	0.603585751	1	1	0.610070793	1	1
1.3878340676962716e-05	NC_044373.1	72483401	72484799	+	64.1262	1398	Intergenic	Intergenic	-15021	LOC115715025	LOC115715025	XM_030643810	protein CURVATURE THYLAKOID 1D, chloroplastic	protein_coding	-0.63215587	1	1	-0.81054852	1	1
3.159000945656189e-11	NW_022060417.1	526801	529799	+	64.1087	2998	Intergenic	Intergenic	-8531	LOC115702073	LOC115702073	XR_004008791	#N/A	lncRNA	NA	NA	NA	NA	NA	NA
1.9292255375952267e-07	NC_044370.1	59257001	59258999	+	64.097	1998	Intergenic	Intergenic	20280	LOC115703439	LOC115703439	XR_004009203	small nucleolar RNA snoR118	snoRNA	0.249824891	1	1	0.34514146	1	1
0.001350470010787053	NC_044370.1	66281401	66281999	+	64.097	598	Intergenic	Intergenic	-22888	LOC115713490	LOC115713490	XM_030641975	uncharacterized LOC115713490	protein_coding	1.076907622	0.90275192	1	-1.329214708	0.57006501	1
1.5302554449515817e-05	NC_044375.1	53413601	53414799	+	64.097	1198	Intergenic	Intergenic	-44902	LOC115718574	LOC115718574	XM_030647384	serine/threonine-protein kinase UCNL	protein_coding	1.682184013	0.257045828	1	-0.065115276	1	1
0.001350470010787053-3	NC_044377.1	6931001	6931599	+	64.097	598	Intergenic	Intergenic	7714	LOC115725675	LOC115725675	XM_030655259	pentatricopeptide repeat-containing protein At1g01970	protein_coding	-0.642928596	1	1	0.338729504	1	1
0.001350470010787053-2	NC_044375.1	54261001	54261799	+	64.097	798	Intergenic	Intergenic	-98062	LOC115720200	LOC115720200	XM_030649356	uncharacterized LOC115720200	protein_coding	NA	NA	NA	NA	NA	NA
1.6873696097679592e-05	NW_022060487.1	789201	790399	+	64.0673	1198	NA	NA	NA	NA			#N/A		NA	NA	NA	NA	NA	NA
2.3385796524251012e-07	NC_044371.1	50415001	50416799	+	64.0572	1798	Intergenic	Intergenic	25100	LOC115706568	LOC115706568	XR_004009602	uncharacterized LOC115706568	lncRNA	0.931259136	1	NA	0.005156152	1	NA
1.860701909400773e-05	NC_044375.1	74931001	74931999	+	64.0369	998	Intergenic	Intergenic	73181	LOC115718555	LOC115718555	XM_030647354	dof zinc finger protein DOF2.4	protein_coding	-1.037962163	0.930531564	1	0.208082395	1	1
1.860701909400773e-05-2	NC_044377.1	53563801	53564799	+	64.0369	998	Intergenic	Intergenic	8627	LOC115725466	LOC115725466	XM_030654996	pathogenesis-related homeodomain protein,	protein_coding	0.039962136	1	1	-0.364499993	1	1
0.0014951465334081136	NC_044378.1	12524601	12525199	+	64.0369	598	Intergenic	Intergenic	26919	LOC115696356	LOC115696356	XM_030623259	copper transporter 1-like	protein_coding	NA	NA	NA	NA	NA	NA
2.574843369773996e-07	NC_044377.1	14346401	14347999	+	64.0369	1598	Intergenic	Intergenic	-47581	LOC115724470	LOC115724470	XM_030653762	nifU-like protein 3, chloroplastic	protein_coding	-0.98677311	1	1	1.00135746	0.997013013	1
2.574843369773996e-07-2	NC_044377.1	52465801	52467399	+	64.0369	1598	Intergenic	Intergenic	131202	LOC115696088	LOC115696088	XR_004007686	small nucleolar RNA R71	snoRNA	NA	NA	NA	NA	NA	NA
2.051937254896323e-05	NC_044377.1	40941801	40942799	+	64.0059	998	Intergenic	Intergenic	-26492	LOC115725313	LOC115725313	XR_004013366	uncharacterized LOC115725313	lncRNA	NA	NA	NA	NA	NA	NA
0.0016555925320025262-2	NC_044377.1	69144601	69145199	+	63.9743	598	Intergenic	Intergenic	4811	LOC115695788	LOC115695788	XM_030622865	probable DNA helicase MCM9	protein_coding	3.889616888	0.191170519	0.870409968	3.515227277	0.255214338	1
2.2629369683098905e-05-2	NC_044376.1	57465601	57466599	+	63.9743	998	intron	-intron (LOC115721842, intron 2 of 2)	-7826	LOC115721802	LOC115721802	XM_030650880	probable RNA-dependent RNA polymerase 1	protein_coding	-1.865620273	0.235632253	1	-0.055758617	1	1
0.0016555925320025262	NC_044372.1	45258401	45258999	+	63.9743	598	Intergenic	Intergenic	48327	LOC115710724	LOC115710724	XM_030639078	uncharacterized LOC115710724	protein_coding	NA	NA	NA	NA	NA	NA
2.2629369683098905e-05-3	NW_022060528.1	92201	93199	+	63.9743	998	intron	-intron (LOC115702303, intron 1 of 3)	10142	LOC115702303	LOC115702303	XM_030629749	#N/A	protein_coding	NA	NA	NA	NA	NA	NA
2.2629369683098905e-05	NC_044374.1	61146601	61147599	+	63.9743	998	Intergenic	Intergenic	-107678	LOC115717880	LOC115717880	XM_030646850	uncharacterized LOC115717880	protein_coding	NA	NA	NA	NA	NA	NA
2.4957574291782002e-05	NC_044370.1	33422001	33423399	+	63.942	1398	Intergenic	Intergenic	30050	LOC115710175	LOC115710175	XM_030638520	E3 ubiquitin-protein ligase RNF25	protein_coding	-0.297944617	1	1	-0.331649008	1	1
4.5893135419624137e-07	NC_044373.1	55288001	55289399	+	63.909	1398	Intergenic	Intergenic	-49132	LOC115714572	LOC115714572	XR_004011079	uncharacterized LOC115714572	lncRNA	0.800741062	1	1	-1.281771022	0.713226963	1
0.0018335669724701986	NC_044370.1	59842201	59842799	+	63.909	598	Intergenic	Intergenic	21243	LOC115702510	LOC115702510	XR_004008903	uncharacterized LOC115702510	lncRNA	NA	NA	NA	NA	NA	NA
8.026276672721081e-09	NW_022060514.1	30201	32399	+	63.909	2198	NA	NA	NA	NA			#N/A		NA	NA	NA	NA	NA	NA
8.83096131722321e-09	NC_044379.1	61638001	61640599	+	63.8922	2598	Intergenic	Intergenic	-38572	LOC115699271	LOC115699271	XM_030626605	THO complex subunit 4D	protein_coding	-0.669019939	1	1	-0.0873762	1	1
5.053775886829294e-07	NC_044378.1	51661201	51662999	+	63.8866	1798	Intergenic	Intergenic	19233	LOC115696641	LOC115696641	XM_030623533	uncharacterized LOC115696641	protein_coding	NA	NA	NA	NA	NA	NA
3.0361874533115646e-05-2	NC_044377.1	78357801	78359399	+	63.8752	1598	intron	-intron (LOC115695586, intron 1 of 3)	739	LOC115695586	LOC115695586	XM_030622643	uncharacterized LOC115695586	protein_coding	NA	NA	NA	NA	NA	NA
3.0361874533115646e-05	NC_044372.1	73405401	73407199	+	63.8752	1798	intron	-intron (LOC115710915, intron 2 of 3)	23645	LOC115710915	LOC115710915	XM_030639266	uncharacterized LOC115710915	protein_coding	NA	NA	NA	NA	NA	NA
0.002031031270633144	NC_044374.1	45448801	45449399	+	63.8408	598	Intergenic	Intergenic	-45304	LOC115717167	LOC115717167	XM_030646119	uncharacterized LOC115717167,	protein_coding	NA	NA	NA	NA	NA	NA
6.128922437630382e-07	NC_044379.1	2183801	2185399	+	63.8408	1598	Intergenic	Intergenic	-605189	LOC115698919	LOC115698919	XM_030626122	extracellular ribonuclease LE	protein_coding	6.151631711	1.47E-17	1.49E-15	3.483828726	2.08E-15	9.58E-14
3.34908212219573e-05	NC_044376.1	25173601	25174999	+	63.8408	1398	Intergenic	Intergenic	-19667	LOC115724148	LOC115724148	XM_030653612	probable glutathione peroxidase 2	protein_coding	1.495537042	0.044910941	0.280481815	2.523221891	8.23E-10	2.25E-08
0.002031031270633144-2	NC_044374.1	72369401	72369999	+	63.8408	598	Intergenic	Intergenic	-358503	LOC115717969	LOC115717969	XM_030646937	uncharacterized LOC115717969	protein_coding	NA	NA	NA	NA	NA	NA
1.2943239686349451e-08	NC_044372.1	73183801	73186399	+	63.8232	2598	Intergenic	Intergenic	-48806	LOC115711788	LOC115711788	XR_004010663	small nucleolar RNA R71	snoRNA	NA	NA	NA	NA	NA	NA
4.49634612578951e-05	NC_044370.1	60438401	60439399	+	63.7327	998	Intergenic	Intergenic	93154	LOC115722809	LOC115722809	XM_030652141	uncharacterized LOC115722809	protein_coding	NA	NA	NA	NA	NA	NA
4.49634612578951e-05-3	NC_044377.1	17536201	17537199	+	63.7327	998	Intergenic	Intergenic	18162	LOC115724434	LOC115724434	XM_030653719	uncharacterized LOC115724434,	protein_coding	1.312511161	0.661769982	1	-0.319934342	1	1
4.49634612578951e-05-2	NC_044375.1	45687001	45688199	+	63.7327	1198	Intergenic	Intergenic	9341	LOC115720126	LOC115720126	XM_030649287	uncharacterized mitochondrial protein AtMg00860-like	protein_coding	NA	NA	NA	NA	NA	NA
4.49634612578951e-05-4	NC_044378.1	39429401	39431199	+	63.7327	1798	Intergenic	Intergenic	16096	LOC115696561	LOC115696561	XM_030623454	uncharacterized LOC115696561	protein_coding	NA	NA	NA	NA	NA	NA
2.9440251840675365e-13	NC_044377.1	44040801	44045199	+	63.7166	4398	Intergenic	Intergenic	-61032	LOC115695668	LOC115695668	XM_030622727	uncharacterized protein At1g66480	protein_coding	-0.071708717	1	1	-3.239340754	1.77E-07	3.64E-06
2.297636882334739e-08	NC_044374.1	43789001	43791199	+	63.7139	2198	Intergenic	Intergenic	-79991	LOC115716271	LOC115716271	XM_030645032	beta-adaptin-like protein B	protein_coding	-0.358124412	1	1	-0.485801849	1	1
4.960820687638531e-05-2	NC_044379.1	9999401	9999999	+	63.695	598	Intergenic	Intergenic	-46431	LOC115699817	LOC115699817	XM_030627360	uncharacterized LOC115699817	protein_coding	NA	NA	NA	NA	NA	NA
4.960820687638531e-05	NC_044374.1	27362601	27364199	+	63.695	1598	Intergenic	Intergenic	-24053	LOC115715840	LOC115715840	XR_004011454	uncharacterized LOC115715840,	lncRNA	1.363844576	0.908374831	NA	-0.798944245	1	NA
5.473596743622651e-05	NC_044371.1	75206001	75207599	+	63.6564	1598	Intergenic	Intergenic	5626	LOC115705070	LOC115705070	XM_030632309	3-oxo-5-alpha-steroid 4-dehydrogenase 2-like	protein_coding	3.977836922	1.87E-07	5.17E-06	2.663746094	6.60E-05	0.000903044
3.36954044413965e-08	NC_044374.1	72694401	72695999	+	63.6368	1598	Intergenic	Intergenic	-33003	LOC115717969	LOC115717969	XM_030646937	uncharacterized LOC115717969	protein_coding	NA	NA	NA	NA	NA	NA
1.4618201536492902e-06	NC_044370.1	74640401	74641799	+	63.6169	1398	Intergenic	Intergenic	35029	LOC115724679	LOC115724679	XM_030654022	uncharacterized protein YuxK-like	protein_coding	-0.341891784	1	1	-0.425384394	1	1
1.4618201536492902e-06-2	NC_044374.1	14611601	14613199	+	63.6169	1598	Intergenic	Intergenic	-28116	LOC115716759	LOC115716759	XM_030645656	uncharacterized LOC115716759	protein_coding	-0.439591222	1	1	-0.648828923	1	1
6.039738154019e-05	NC_044374.1	65919801	65920799	+	63.6169	998	Intergenic	Intergenic	-31834	LOC115718305	LOC115718305	XR_004011885	small nucleolar RNA R71	snoRNA	NA	NA	NA	NA	NA	NA
4.0809021394436974e-08	NC_044379.1	5443401	5445199	+	63.5968	1798	Intergenic	Intergenic	-158180	LOC115701194	LOC115701194	XM_030628916	39S ribosomal protein L28, mitochondrial	protein_coding	-0.292764956	1	1	-0.319866486	1	1
1.6102700426033526e-06	NW_022060454.1	340001	341399	+	63.5901	1398	Intergenic	Intergenic	-163458	LOC115702127	LOC115702127	XM_030629586	#N/A	protein_coding	-1.078418672	0.906335909	1	0.136444746	1	1
6.664844995547407e-05	NC_044370.1	21804601	21805599	+	63.5765	998	Intergenic	Intergenic	-7835	LOC115706511	LOC115706511	XM_030634182	ankyrin-1	protein_coding	-1.956613688	0.000374029	0.005010419	1.485510749	0.078238591	0.474554023
6.664844995547407e-05-2	NC_044375.1	48004601	48005599	+	63.5765	998	TTS	-TTS (LOC115718795)	661	LOC115718795	LOC115718795	XR_004012039	uncharacterized LOC115718795	lncRNA	NA	NA	NA	NA	NA	NA
1.7738463132027933e-06	NC_044374.1	68058401	68060399	+	63.5628	1998	intron	-intron (LOC115717923, intron 1 of 1)	66949	LOC115716666	LOC115716666	XM_030645517	probable leucine-rich repeat receptor-like protein kinase At5g49770	protein_coding	2.120203509	0.004106214	0.038466739	1.08284354	0.830819759	1
7.355111053187429e-05-3	NC_044379.1	25385801	25386799	+	63.5351	998	Intergenic	Intergenic	105692	LOC115699951	LOC115699951	XM_030627497	uncharacterized LOC115699951	protein_coding	NA	NA	NA	NA	NA	NA
7.355111053187429e-05	NC_044372.1	37154801	37155999	+	63.5351	1198	Intergenic	Intergenic	72879	LOC115710299	LOC115710299	XM_030638665	RHOMBOID-like protein 12, mitochondrial	protein_coding	-0.340039036	1	1	-0.12052189	1	1
7.355111053187429e-05-2	NC_044378.1	23419401	23420399	+	63.5351	998	Intergenic	Intergenic	-14662	LOC115697138	LOC115697138	XR_004007898	uncharacterized LOC115697138	lncRNA	NA	NA	NA	NA	NA	NA
5.987038778978973e-08	NC_044377.1	43674201	43675999	+	63.514	1798	Intergenic	Intergenic	-428932	LOC115695668	LOC115695668	XM_030622727	uncharacterized protein At1g66480	protein_coding	-0.071708717	1	1	-3.239340754	1.77E-07	3.64E-06
2.1527264253357433e-06	NC_044375.1	41053801	41055199	+	63.507	1398	Intergenic	Intergenic	-70470	LOC115720736	LOC115720736	XM_030649907	cysteine desulfurase 1, chloroplastic	protein_coding	-0.894881674	1	1	0.4737555	1	1
8.11738757372897e-05-3	NC_044378.1	48456601	48457599	+	63.4927	998	Intergenic	Intergenic	-25387	LOC115696617	LOC115696617	XM_030623511	uncharacterized LOC115696617	protein_coding	NA	NA	NA	NA	NA	NA
8.11738757372897e-05-2	NC_044375.1	87775001	87776199	+	63.4927	1198	Intergenic	Intergenic	7302	LOC115720464	LOC115720464	XM_030649611	zinc finger BED domain-containing protein DAYSLEEPER-like	protein_coding	NA	NA	NA	NA	NA	NA
8.11738757372897e-05	NC_044375.1	86842601	86843599	+	63.4927	998	Intergenic	Intergenic	-11569	LOC115719325	LOC115719325	XM_030648311	ubiquitin-conjugating enzyme E2-17 kDa	protein_coding	-0.25353893	1	1	-0.086913748	1	1
8.959253976851942e-05	NC_044374.1	62000001	62000999	+	63.4493	998	Intergenic	Intergenic	-120682	LOC115717886	LOC115717886	XM_030646856	uncharacterized mitochondrial protein AtMg00310-like	protein_coding	0	1	NA	-1.742002822	0.854499492	NA
8.959253976851942e-05-2	NC_044378.1	45261801	45262999	+	63.4493	1198	Intergenic	Intergenic	-187797	LOC115696594	LOC115696594	XM_030623487	protein UNUSUAL FLORAL ORGANS	protein_coding	0	1	NA	-2.696098856	0.669954273	NA
7.982351956235689e-08	NC_044371.1	55190201	55192599	+	63.4493	2398	Intergenic	Intergenic	268535	LOC115707541	LOC115707541	XM_030635546	tRNA:m(4)X modification enzyme TRM13,	protein_coding	-0.377874846	1	1	-0.385378342	1	1
7.982351956235689e-08-2	NC_044373.1	59103601	59106999	+	63.4493	3398	Intergenic	Intergenic	13287	LOC115715097	LOC115715097	XM_030643898	protein STRUBBELIG-RECEPTOR FAMILY 5,	protein_coding	0.073285966	1	1	0.570404348	1	1
8.959253976851942e-05-3	NW_022060518.1	273401	274399	+	63.4493	998	Intergenic	Intergenic	12937	LOC115702280	LOC115702280	XM_030629727	#N/A	protein_coding	1.749589395	0.493270775	1	1.601048121	0.562730867	1
3.127348037562774e-12	NC_044378.1	16225001	16228199	+	63.4239	3198	Intergenic	Intergenic	27758	LOC115697355	LOC115697355	XM_030624325	protein CHROMATIN REMODELING 4,	protein_coding	-0.095876606	1	1	0.049234236	1	1
1.0644326813628088e-07	NC_044373.1	30063801	30065599	+	63.382	1798	Intergenic	Intergenic	34088	LOC115712551	LOC115712551	XM_030640848	peptidyl-prolyl cis-trans isomerase PASTICCINO1	protein_coding	0.509765209	1	1	0.141773829	1	1
1.4883623427961154e-13	NC_044375.1	10001	13999	+	63.382	3998	Intergenic	Intergenic	-12678	LOC115720811	LOC115720811	XM_030649989	probable fatty acyl-CoA reductase 5,	protein_coding	9.528275189	1.30E-10	5.73E-09	1.828890828	0.332671444	1
3.4946519823518336e-06	NC_044376.1	29575201	29576599	+	63.3591	1398	Intergenic	Intergenic	-16793	TRNAT-UGU_4	TRNAT-UGU_4	TRNAT-UGU_4	#N/A	tRNA	NA	NA	NA	NA	NA	NA
0.00010916194232850661	NC_044377.1	53406201	53407199	+	63.3591	998	Intergenic	Intergenic	-35437	LOC115725387	LOC115725387	XM_030654897	protein CHLOROPLAST IMPORT APPARATUS 2,	protein_coding	-2.115559159	4.57E-08	1.38E-06	1.037678166	0.854967319	1
0.0037672888644139273-2	NC_044375.1	43653801	43654199	+	63.3591	398	Intergenic	Intergenic	-140995	LOC115721317	LOC115721317	XM_030650591	tropomyosin-2-like	protein_coding	0.234417585	1	1	-1.706036753	0.502563852	1
0.0037672888644139273	NC_044370.1	100856201	100856599	+	63.3591	398	Intergenic	Intergenic	-12886	LOC115700135	LOC115700135	XM_030627698	F-box protein AFR	protein_coding	-0.57169228	1	1	1.033811277	0.908409404	1
0.00010916194232850661-2	NC_044378.1	17422001	17423199	+	63.3591	1198	Intergenic	Intergenic	5014	LOC115696918	LOC115696918	XR_004007815	uncharacterized LOC115696918	lncRNA	NA	NA	NA	NA	NA	NA
3.850601829476983e-06	NC_044377.1	71940601	71942199	+	63.328	1598	Intergenic	Intergenic	37669	LOC115725224	LOC115725224	XM_030654668	auxin-responsive protein SAUR50	protein_coding	-0.320688342	1	1	-2.591700446	0.001943596	0.019975002
1.4196345405084026e-07	NC_044370.1	67430001	67431799	+	63.3122	1798	Intergenic	Intergenic	-51628	LOC115713581	LOC115713581	XM_030642072	protein SNOWY COTYLEDON 3	protein_coding	NA	NA	NA	NA	NA	NA
0.00013304334224362613	NC_044379.1	13477001	13477999	+	63.2642	998	Intergenic	Intergenic	17811	LOC115698960	LOC115698960	XM_030626174	exocyst complex component EXO70A1	protein_coding	-0.589382379	1	1	1.473264822	0.409422347	1
4.6754290195914286e-06	NC_044372.1	35144001	35145199	+	63.2642	1198	intron	-intron (LOC115710646, intron 1 of 1)	1762	LOC115710646	LOC115710646	XM_030639003	uncharacterized LOC115710646	protein_coding	NA	NA	NA	NA	NA	NA
7.151448250821885e-09	NC_044377.1	283001	284999	+	63.2446	1998	Intergenic	Intergenic	-32224	LOC115695619	LOC115695619	XM_030622676	heavy metal-associated isoprenylated plant protein 47-like	protein_coding	0.746422942	1	NA	3.745856045	0.208679766	1
1.1762155707008626e-11	NC_044373.1	32985201	32988999	+	63.2362	3798	Intergenic	Intergenic	38562	LOC115714859	LOC115714859	XR_004011135	uncharacterized LOC115714859	lncRNA	NA	NA	NA	NA	NA	NA
5.152169321710178e-06	NC_044370.1	11435001	11436199	+	63.2314	1198	Intergenic	Intergenic	-7324	LOC115720050	LOC115720050	XM_030649272	serine/threonine-protein phosphatase BSL1,	protein_coding	-0.138491124	1	1	0.114460168	1	1
0.0001468932771381947	NC_044377.1	29739601	29740799	+	63.2149	1198	Intergenic	Intergenic	12685	LOC115724533	LOC115724533	XM_030653831	65-kDa microtubule-associated protein 1	protein_coding	0.490257238	1	1	-0.558405259	1	1
5.677719598102262e-06	NC_044378.1	53293201	53294599	+	63.1981	1398	Intergenic	Intergenic	-52073	LOC115696649	LOC115696649	XM_030623540	uncharacterized LOC115696649	protein_coding	NA	NA	NA	NA	NA	NA
2.2949447979788563e-07	NC_044371.1	55679001	55680799	+	63.1897	1798	Intergenic	Intergenic	34901	LOC115704435	LOC115704435	XM_030631642	transmembrane protein 258-like	protein_coding	0.559780378	1	1	-0.220720684	1	1
1.278844159114677e-15	NC_044372.1	1822401	1826799	+	63.1846	4398	intron	-intron (LOC115709523, intron 4 of 4)	14412	LOC115709013	LOC115709013	XM_030637033	anthocyanin 5-aromatic acyltransferase	protein_coding	-0.118311355	1	1	2.289407264	0.003508716	0.033052528
1.7177145203466894e-11	NC_044378.1	64719001	64722399	+	63.1788	3398	Intergenic	Intergenic	155050	LOC115697921	LOC115697921	XR_004008003	uncharacterized LOC115697921	lncRNA	NA	NA	NA	NA	NA	NA
0.00016219730977243786-2	NC_044375.1	13289801	13291199	+	63.1642	1398	Intergenic	Intergenic	-10919	LOC115720789	LOC115720789	XM_030649967	GDSL esterase/lipase LTL1	protein_coding	8.966482768	2.11E-05	0.00038682	3.80100257	0.075282638	0.460034543
1.0476151887797545e-08	NC_044376.1	33406601	33407799	+	63.1642	1198	intron	-intron (LOC115723775, intron 6 of 6)	14837	LOC115723775	LOC115723775	XM_030653248	uncharacterized LOC115723775	protein_coding	NA	NA	NA	NA	NA	NA
0.00016219730977243786-3	NC_044376.1	33360801	33361599	+	63.1642	798	Intergenic	Intergenic	-9665	LOC115723774	LOC115723774	XM_030653247	uncharacterized mitochondrial protein AtMg00810-like	protein_coding	NA	NA	NA	NA	NA	NA
2.5264870966500197e-07	NC_044377.1	54879401	54882399	+	63.1642	2998	Intergenic	Intergenic	47494	LOC115724649	LOC115724649	XM_030653980	auxin efflux carrier component 2	protein_coding	1.916017028	0.81856924	NA	1.541620378	0.892111556	NA
0.00016219730977243786-4	NC_044377.1	60225601	60226399	+	63.1642	798	Intergenic	Intergenic	-54497	LOC115725132	LOC115725132	XM_030654565	protein disulfide-isomerase 5-4	protein_coding	-0.084628625	1	1	-0.347689341	1	1
6.25710100115286e-06	NC_044378.1	22176601	22178599	+	63.1642	1998	Intergenic	Intergenic	-51071	LOC115697423	LOC115697423	XM_030624419	PRA1 family protein E	protein_coding	0.417868412	1	1	0.508541597	1	1
0.00016219730977243786	NC_044371.1	82374401	82375399	+	63.1642	998	Intergenic	Intergenic	3098	LOC115704431	LOC115704431	XM_030631637	uncharacterized LOC115704431	protein_coding	NA	NA	NA	NA	NA	NA
1.1525703482277359e-08	NC_044374.1	6503601	6506399	+	63.1436	2798	Intergenic	Intergenic	-14289	LOC115716850	LOC115716850	XM_030645755	UPF0496 protein At3g49070-like	protein_coding	2.943587446	0.172704687	0.805997136	3.538719628	0.074953581	0.458451678
2.781446742786684e-07	NC_044376.1	35929201	35930999	+	63.1384	1798	Intergenic	Intergenic	26514	LOC115722879	LOC115722879	XM_030652230	probable serine/threonine-protein kinase WNK9	protein_coding	-0.575784068	1	1	0.840804642	1	1
6.8958541305478175e-06	NC_044375.1	45825201	45826999	+	63.1297	1798	Intergenic	Intergenic	1390	LOC115721546	LOC115721546	XR_004012561	small nucleolar RNA R71	snoRNA	NA	NA	NA	NA	NA	NA
0.0001791097247845799	NC_044374.1	37698801	37699799	+	63.1122	998	Intergenic	Intergenic	-31988	LOC115717728	LOC115717728	XM_030646708	probable carboxylesterase 120	protein_coding	3.110103512	0.086133495	0.471185025	6.351720235	0.000886227	0.009833613
0.0001791097247845799-2	NC_044375.1	34555001	34555799	+	63.1122	798	Intergenic	Intergenic	8599	LOC115721279	LOC115721279	XR_004012422	uncharacterized LOC115721279	lncRNA	2.293765801	0.744733572	NA	2.881130672	0.635916083	NA
3.062198574722484e-07-2	NC_044377.1	17395801	17397599	+	63.1122	1798	Intergenic	Intergenic	63025	LOC115724706	LOC115724706	XR_004013260	uncharacterized LOC115724706	lncRNA	NA	NA	NA	NA	NA	NA
3.062198574722484e-07	NC_044372.1	50940601	50942199	+	63.1122	1598	Intergenic	Intergenic	172272	LOC115710754	LOC115710754	XM_030639106	uncharacterized mitochondrial protein AtMg00310-like	protein_coding	NA	NA	NA	NA	NA	NA
0.0001791097247845799-3	NW_022060467.1	91601	92399	+	63.1122	798	Intergenic	Intergenic	-23753	LOC115702166	LOC115702166	XR_004008812	#N/A	lncRNA	5.208357097	0.008294614	0.069174563	3.433634282	0.076375083	0.46584057
1.3951329536310638e-08	NC_044374.1	58736601	58738999	+	63.1017	2398	Intergenic	Intergenic	25275	LOC115715829	LOC115715829	XR_004011449	uncharacterized LOC115715829,	lncRNA	0.500272922	1	1	-0.93764179	1	1
6.837839956778856e-14	NC_044370.1	40959601	40963599	+	63.0827	3998	Intergenic	Intergenic	-7625	LOC115702583	LOC115702583	XR_004008928	uncharacterized LOC115702583	lncRNA	6.669116088	0.002220071	0.022821619	7.256510179	0.000735285	0.00827512
0.00019780139590891408	NC_044374.1	14023401	14024199	+	63.0588	798	Intergenic	Intergenic	-8771	LOC115716829	LOC115716829	XM_030645738	cleavage and polyadenylation specificity factor subunit 2	protein_coding	-0.017536879	1	1	-0.164460425	1	1
0.00019780139590891408-2	NC_044379.1	3567801	3568599	+	63.0588	798	TTS	-TTS (LOC115701762)	3602	LOC115701762	LOC115701762	XR_004008747	28S ribosomal RNA	rRNA	1.374051984	0.564145906	1	1.187118883	0.756031517	1
8.376565480707426e-06	NC_044370.1	62246401	62247799	+	63.0588	1398	Intergenic	Intergenic	-18451	LOC115722991	LOC115722991	XM_030652386	2-acylphloroglucinol 4-prenyltransferase-like	protein_coding	8.569051365	6.22E-09	2.17E-07	5.734310354	5.53E-09	1.34E-07
4.086730000209816e-07	NC_044378.1	33928801	33930399	+	63.0315	1598	Intergenic	Intergenic	11887	LOC115698393	LOC115698393	XR_004008142	small nucleolar RNA R71	snoRNA	NA	NA	NA	NA	NA	NA
4.8690741126927223e-11	NC_044370.1	33536601	33539999	+	63.0118	3398	Intergenic	Intergenic	-135153	LOC115703089	LOC115703089	XR_004009007	uncharacterized LOC115703089	lncRNA	NA	NA	NA	NA	NA	NA
0.00021846160018916267	NC_044378.1	26542401	26543199	+	63.0039	798	Intergenic	Intergenic	-2881	LOC115698045	LOC115698045	XM_030625231	protein NRT1/ PTR FAMILY 3.1	protein_coding	-2.469477961	7.65E-05	0.001223731	7.127889715	1.27E-20	9.14E-19
4.4996162551017753e-07	NC_044371.1	55172401	55174399	+	63.0039	1998	Intergenic	Intergenic	250535	LOC115707541	LOC115707541	XM_030635546	tRNA:m(4)X modification enzyme TRM13,	protein_coding	-0.377874846	1	1	-0.385378342	1	1
0.00021846160018916267-2	NC_044378.1	70351401	70352199	+	63.0039	798	Intergenic	Intergenic	19823	LOC115696863	LOC115696863	XM_030623747	sulfiredoxin, chloroplastic/mitochondrial	protein_coding	-1.124789205	0.631974545	1	0.735928021	1	1
4.4996162551017753e-07-2	NC_044376.1	11045801	11047999	+	63.0039	2198	Intergenic	Intergenic	12652	LOC115723005	LOC115723005	XM_030652400	isocitrate dehydrogenase [NAD] catalytic subunit 5, mitochondrial,	protein_coding	0.122342398	1	1	-0.095904682	1	1
1.039954264562289e-09	NC_044374.1	24261801	24264399	+	63.0039	2598	Intergenic	Intergenic	3816	LOC115718251	LOC115718251	XR_004011832	small nucleolar RNA R71	snoRNA	NA	NA	NA	NA	NA	NA
1.1437149289747678e-09	NC_044370.1	27812001	27814399	+	62.9853	2398	Intergenic	Intergenic	17257	LOC115719342	LOC115719342	XM_030648336	uncharacterized LOC115719342	protein_coding	NA	NA	NA	NA	NA	NA
0.00024130003499153813	NC_044372.1	90835401	90836199	+	62.9475	798	Intergenic	Intergenic	7933	LOC115711133	LOC115711133	XM_030639469	agamous-like MADS-box protein AGL80	protein_coding	NA	NA	NA	NA	NA	NA
5.455107160345463e-07	NC_044377.1	58411001	58412599	+	62.9475	1598	Intergenic	Intergenic	18580	LOC115724685	LOC115724685	XM_030654024	vicianin hydrolase	protein_coding	6.077698009	7.34E-05	0.001179213	2.629489952	0.007425385	0.064216011
0.00024130003499153813-2	NW_022060487.1	523601	524399	+	62.9475	798	NA	NA	NA	NA			#N/A		NA	NA	NA	NA	NA	NA
2.996687529882743e-08	NC_044377.1	42621201	42623199	+	62.9244	1998	Intergenic	Intergenic	-107463	LOC115694858	LOC115694858	XR_004007497	uncharacterized LOC115694858	lncRNA	NA	NA	NA	NA	NA	NA
6.006643028257563e-07	NC_044377.1	30031401	30033399	+	62.9186	1998	Intergenic	Intergenic	-17061	LOC115725587	LOC115725587	XM_030655163	uncharacterized LOC115725587	protein_coding	-0.642216525	1	1	0.830168679	1	1
1.2365804241660811e-05	NC_044373.1	72774801	72775999	+	62.9089	1198	Intergenic	Intergenic	6798	LOC115713655	LOC115713655	XM_030642142	uncharacterized mitochondrial protein AtMg00820-like	protein_coding	NA	NA	NA	NA	NA	NA
1.2365804241660811e-05-2	NC_044374.1	61950001	61951199	+	62.9089	1198	Intergenic	Intergenic	-70782	LOC115717886	LOC115717886	XM_030646856	uncharacterized mitochondrial protein AtMg00310-like	protein_coding	0	1	NA	-1.742002822	0.854499492	NA
0.00026654906114340895-2	NC_044377.1	16781401	16782199	+	62.8894	798	Intergenic	Intergenic	11907	LOC115725695	LOC115725695	XM_030655285	uncharacterized LOC115725695	protein_coding	NA	NA	NA	NA	NA	NA
0.00026654906114340895-3	NC_044379.1	5594601	5595399	+	62.8894	798	Intergenic	Intergenic	298934	LOC115701102	LOC115701102	XM_030628797	homeobox-leucine zipper protein ATHB-54-like	protein_coding	1.988125155	0.091140449	0.4918565	2.807728882	0.002802251	0.027313252
0.00026654906114340895	NC_044370.1	21862601	21863399	+	62.8894	798	Intergenic	Intergenic	-12458	LOC115706519	LOC115706519	XR_004009598	uncharacterized LOC115706519	lncRNA	NA	NA	NA	NA	NA	NA
3.62834627554295e-08	NC_044375.1	35365201	35367199	+	62.8776	1998	Intergenic	Intergenic	-13860	LOC115720049	LOC115720049	XM_030649214	uncharacterized LOC115720049	protein_coding	NA	NA	NA	NA	NA	NA
1.3631856646468992e-05	NC_044373.1	36959201	36960799	+	62.8697	1598	Intergenic	Intergenic	3354	LOC115712622	LOC115712622	XR_004010900	uncharacterized LOC115712622	lncRNA	1.433756029	0.79382415	1	0.641761237	1	1
1.25632434423817e-10	NC_044378.1	66926201	66928999	+	62.8469	2798	Intergenic	Intergenic	-9612	LOC115696871	LOC115696871	XM_030623757	pyruvate dehydrogenase E1 component subunit beta-3, chloroplastic	protein_coding	-0.75176981	1	1	-0.17286403	1	1
1.5028156653830857e-05	NC_044376.1	35876401	35877599	+	62.8296	1198	Intergenic	Intergenic	2502	LOC115723803	LOC115723803	XM_030653273	uncharacterized LOC115723803	protein_coding	-2.079032467	0.786924321	NA	0.998307353	1	NA
1.5028156653830857e-05-2	NC_044378.1	56143801	56145399	+	62.8296	1598	Intergenic	Intergenic	8973	LOC115696664	LOC115696664	XM_030623554	uncharacterized LOC115696664	protein_coding	NA	NA	NA	NA	NA	NA
2.448472250212349e-09	NC_044370.1	90666801	90670199	+	62.8296	3398	Intergenic	Intergenic	-61665	LOC115697614	LOC115697614	XM_030624700	XIAP-associated factor 1,	protein_coding	0.134749286	1	1	0.17810636	1	1
0.0002944661983081605-3	NC_044372.1	22940001	22941199	+	62.8296	1198	Intergenic	Intergenic	-3199	LOC115710550	LOC115710550	XM_030638910	uncharacterized LOC115710550	protein_coding	0.410947537	1	NA	0.998328082	1	NA
0.0002944661983081605-2	NC_044371.1	83371601	83372399	+	62.8296	798	Intergenic	Intergenic	-59333	LOC115706663	LOC115706663	XM_030634378	spastin	protein_coding	0.101753667	1	1	-0.124813227	1	1
0.0002944661983081605	NC_044370.1	75601601	75602399	+	62.8296	798	Intergenic	Intergenic	36172	LOC115714587	LOC115714587	XM_030643333	probable protein phosphatase 2C 60	protein_coding	-0.132704095	1	1	-0.304021085	1	1
0.0002944661983081605-4	NC_044373.1	63402001	63402799	+	62.8296	798	Intergenic	Intergenic	99668	LOC115712143	LOC115712143	XR_004010795	uncharacterized LOC115712143	lncRNA	NA	NA	NA	NA	NA	NA
5.444667428403783e-13	NC_044377.1	24809401	24811599	+	62.8025	2198	Intergenic	Intergenic	58752	LOC115695060	LOC115695060	XM_030622157	uncharacterized LOC115695060	protein_coding	NA	NA	NA	NA	NA	NA
1.6568180311373252e-05-2	NC_044376.1	53757801	53759399	+	62.7888	1598	Intergenic	Intergenic	-118113	LOC115724262	LOC115724262	XR_004013061	small nucleolar RNA R71	snoRNA	NA	NA	NA	NA	NA	NA
1.6568180311373252e-05	NC_044373.1	44706001	44707599	+	62.7888	1598	Intergenic	Intergenic	-36211	LOC115715238	LOC115715238	XM_030644076	systemin receptor SR160	protein_coding	-0.201263752	1	1	-0.08752038	1	1
0.0003253369018405393	NC_044373.1	16074401	16075199	+	62.7681	798	Intergenic	Intergenic	-8357	LOC115712602	LOC115712602	XM_030640905	flavonoid 3',5'-methyltransferase	protein_coding	8.372048177	1.49E-41	7.36E-39	6.744386867	4.13E-46	1.40E-43
0.0003253369018405393-2	NC_044374.1	31474001	31474799	+	62.7681	798	Intergenic	Intergenic	92345	LOC115718148	LOC115718148	XR_004011767	uncharacterized LOC115718148	lncRNA	NA	NA	NA	NA	NA	NA
9.725820101855927e-07	NC_044374.1	20487601	20489399	+	62.7681	1798	Intergenic	Intergenic	13992	LOC115715993	LOC115715993	XM_030644682	protein PARTING DANCERS-like,	protein_coding	2.511266095	0.312397463	1	-1.154723029	0.874043786	1
0.0003253369018405393-3	NC_044377.1	73704201	73704999	+	62.7681	798	Intergenic	Intergenic	57539	LOC115694792	LOC115694792	XM_030621887	uncharacterized LOC115694792	protein_coding	NA	NA	NA	NA	NA	NA
9.576128311947115e-30	NC_044370.1	104003401	104012799	+	62.7545	9398	Intergenic	Intergenic	-4910	LOC115702086	LOC115702086	XM_030629532	zinc finger CCCH domain-containing protein 15,	protein_coding	0.026174451	1	1	0.33177898	1	1
1.8266807504253627e-05-2	NC_044373.1	44147601	44148799	+	62.7472	1198	Intergenic	Intergenic	-28309	LOC115714342	LOC115714342	XM_030643016	crossover junction endonuclease EME1B,	protein_coding	0.176722662	1	1	-0.725323807	1	1
1.8266807504253627e-05-3	NC_044374.1	70705401	70706599	+	62.7472	1198	Intergenic	Intergenic	-5020	LOC115716402	LOC115716402	XM_030645187	nudix hydrolase 14, chloroplastic	protein_coding	0.029929488	1	1	-0.071042225	1	1
1.8266807504253627e-05	NC_044370.1	73604801	73606199	+	62.7472	1398	Intergenic	Intergenic	-15096	LOC115703363	LOC115703363	XR_004009135	small nucleolar RNA R71	snoRNA	NA	NA	NA	NA	NA	NA
1.8266807504253627e-05-5	NC_044377.1	32873801	32875799	+	62.7472	1998	Intergenic	Intergenic	-251324	LOC115695107	LOC115695107	XM_030622197	uncharacterized LOC115695107	protein_coding	NA	NA	NA	NA	NA	NA
1.8266807504253627e-05-4	NC_044374.1	77025601	77026599	+	62.7472	998	Intergenic	Intergenic	523942	LOC115718006	LOC115718006	XM_030646974	uncharacterized LOC115718006	protein_coding	0.410947537	1	NA	0.998328082	1	NA
6.442657006916039e-08	NC_044378.1	43696401	43699199	+	62.7303	2798	Intergenic	Intergenic	-85461	LOC115698398	LOC115698398	XR_004008147	small nucleolar RNA R71	snoRNA	NA	NA	NA	NA	NA	NA
0.00035947765389582575	NC_044370.1	32551601	32552399	+	62.7048	798	Intergenic	Intergenic	38102	LOC115719828	LOC115719828	XM_030649016	ankyrin repeat-containing protein BDA1-like	protein_coding	NA	NA	NA	NA	NA	NA
2.0140469407645217e-05-2	NC_044375.1	41903201	41905399	+	62.7048	2198	Intergenic	Intergenic	-8198	LOC115719656	LOC115719656	XM_030648776	scarecrow-like protein 34	protein_coding	0.642273312	1	1	-0.508021765	1	1
0.00035947765389582575-2	NC_044377.1	25431401	25432199	+	62.7048	798	Intergenic	Intergenic	31719	LOC115695063	LOC115695063	XM_030622159	probable auxin efflux carrier component 1c	protein_coding	3.570760702	0.436818732	NA	4.15813309	0.339451176	1
2.0140469407645217e-05	NC_044372.1	53525601	53527599	+	62.7048	1998	TTS	-TTS (LOC115711369)	1048	LOC115711369	LOC115711369	XM_030639704	uncharacterized LOC115711369	protein_coding	NA	NA	NA	NA	NA	NA
1.299060600013838e-06	NC_044373.1	18227601	18229399	+	62.6724	1798	Intergenic	Intergenic	29299	LOC115714770	LOC115714770	XM_030643524	homeobox-leucine zipper protein HDG11	protein_coding	1.236103384	0.506117087	1	3.189987268	2.44E-09	6.24E-08
2.2207311583764076e-05	NC_044377.1	29071801	29073199	+	62.6615	1398	Intergenic	Intergenic	81504	LOC115725518	LOC115725518	XM_030655070	GDP-L-galactose phosphorylase 2	protein_coding	-1.654360582	0.036110103	0.235064174	-0.227099129	1	1
0.00039723940554378505	NC_044372.1	53079401	53080599	+	62.6395	1198	Intergenic	Intergenic	-33436	LOC115711878	LOC115711878	XR_004010746	small nucleolar RNA R71	snoRNA	NA	NA	NA	NA	NA	NA
0.00039723940554378505-4	NC_044378.1	34111201	34112599	+	62.6395	1398	Intergenic	Intergenic	22761	LOC115697126	LOC115697126	XM_030624041	cannabidiolic acid synthase-like 1	protein_coding	0.477275467	1	1	-0.951889574	1	1
0.00039723940554378505-2	NC_044372.1	78915801	78916599	+	62.6395	798	Intergenic	Intergenic	15690	LOC115708913	LOC115708913	XM_030636939	protein cornichon homolog 1,	protein_coding	0.400972924	1	1	0.135823463	1	1
0.00039723940554378505-3	NC_044374.1	51650601	51651399	+	62.6395	798	Intergenic	Intergenic	5935	LOC115717831	LOC115717831	XM_030646802	uncharacterized LOC115717831	protein_coding	NA	NA	NA	NA	NA	NA
6.346159883190402e-09	NC_044375.1	43244201	43247199	+	62.6173	2998	Intergenic	Intergenic	-549295	LOC115721317	LOC115721317	XM_030650591	tropomyosin-2-like	protein_coding	0.234417585	1	1	-1.706036753	0.502563852	1
2.7002792660688135e-05-2	NC_044379.1	49846201	49847399	+	62.5722	1198	Intergenic	Intergenic	6135	LOC115701086	LOC115701086	XR_004008498	uncharacterized LOC115701086	lncRNA	NA	NA	NA	NA	NA	NA
0.00043901141112545795-3	NC_044379.1	51915201	51915999	+	62.5722	798	Intergenic	Intergenic	-5137	LOC115701267	LOC115701267	XM_030629017	calcium permeable stress-gated cation channel 1	protein_coding	2.617321607	0.131013557	0.652285316	-0.686414097	1	1
0.00043901141112545795-2	NC_044377.1	41423401	41424399	+	62.5722	998	Intergenic	Intergenic	-31460	LOC115696056	LOC115696056	XR_004007654	small nucleolar RNA R71	snoRNA	NA	NA	NA	NA	NA	NA
0.00043901141112545795	NC_044376.1	21074201	21075199	+	62.5722	998	Intergenic	Intergenic	65154	LOC115723654	LOC115723654	XM_030653137	uncharacterized LOC115723654	protein_coding	NA	NA	NA	NA	NA	NA
2.7002792660688135e-05	NC_044375.1	15055601	15056799	+	62.5722	1198	promoter-TSS	-promoter-TSS (LOC115721553)	-1663	LOC115721553	LOC115721553	XR_004012568	small nucleolar RNA R71	snoRNA	NA	NA	NA	NA	NA	NA
0.0004852255011572063	NC_044370.1	65197001	65197799	+	62.5029	798	Intergenic	Intergenic	-16142	LOC115703303	LOC115703303	XR_004009078	small nucleolar RNA R71	snoRNA	NA	NA	NA	NA	NA	NA
0.0004852255011572063-2	NC_044374.1	57559801	57560599	+	62.5029	798	Intergenic	Intergenic	18306	LOC115715662	LOC115715662	XM_030644321	peroxidase P7	protein_coding	3.876751571	0.144051311	0.700722984	1.905063134	0.609087918	1
2.1055179733221405e-06	NC_044371.1	68109401	68111399	+	62.5029	1998	Intergenic	Intergenic	-24414	LOC115704279	LOC115704279	XM_030631493	uncharacterized LOC115704279	protein_coding	-1.694812535	0.394500563	1	-1.184279605	0.820653356	1
0.0004852255011572063-3	NC_044375.1	62068201	62068999	+	62.5029	798	Intergenic	Intergenic	-7355	LOC115720242	LOC115720242	XM_030649399	uncharacterized LOC115720242	protein_coding	NA	NA	NA	NA	NA	NA
1.12436287301724e-08	NC_044374.1	56996001	56998399	+	62.4793	2398	Intergenic	Intergenic	10582	LOC115716353	LOC115716353	XM_030645131	#N/A	protein_coding	-2.682177321	0.008411021	0.070005568	1.838348962	0.202641614	1
3.2840055515632494e-05	NC_044372.1	37886201	37887399	+	62.4793	1198	Intergenic	Intergenic	36449	LOC115709987	LOC115709987	XM_030638270	2,3-bisphosphoglycerate-independent phosphoglycerate mutase	protein_coding	-0.608709562	1	1	0.026185875	1	1
2.3192095608134194e-06	NC_044370.1	65202201	65203799	+	62.4674	1598	Intergenic	Intergenic	-21742	LOC115703303	LOC115703303	XR_004009078	small nucleolar RNA R71	snoRNA	NA	NA	NA	NA	NA	NA
1.6796139219422616e-07	NC_044378.1	51462201	51463999	+	62.4602	1798	Intergenic	Intergenic	6797	LOC115698344	LOC115698344	XR_004008097	small nucleolar RNA R71	snoRNA	NA	NA	NA	NA	NA	NA
1.013553403825938e-09	NC_044372.1	57141201	57143599	+	62.4313	2398	Intergenic	Intergenic	-29252	LOC115710178	LOC115710178	XM_030638519	translation initiation factor eIF-2B subunit delta,	protein_coding	-0.802689806	1	1	0.065098812	1	1
3.6218749918440596e-05	NC_044371.1	50419801	50420999	+	62.4313	1198	Intergenic	Intergenic	-21350	LOC115707890	LOC115707890	XM_030635983	WD repeat-containing protein VIP3	protein_coding	-0.308898199	1	1	-0.220844452	1	1
0.00053636084581245	NC_044373.1	65247201	65247999	+	62.4313	798	Intergenic	Intergenic	-137851	LOC115715342	LOC115715342	XR_004011218	small nucleolar RNA R71	snoRNA	NA	NA	NA	NA	NA	NA
0.00053636084581245-2	NC_044374.1	1286001	1286799	+	62.4313	798	Intergenic	Intergenic	8419	LOC115715915	LOC115715915	XM_030644590	terpene synthase 10-like,	protein_coding	-1.810511595	0.5388118	1	-2.335792445	0.29752612	1
0.00053636084581245-4	NW_022060473.1	49201	49999	+	62.4313	798	intron	-intron (LOC115702181, intron 1 of 1)	5436	LOC115702181	LOC115702181	XM_030629632	#N/A	protein_coding	-1.725638098	0.28173757	1	-5.727960682	7.21E-16	3.43E-14
0.00053636084581245-3	NW_022060437.1	11601	12399	+	62.4313	798	Intergenic	Intergenic	-15221	LOC115702099	LOC115702099	XM_030629546	#N/A	protein_coding	-1.713028194	0.001100904	0.012679858	-1.431771817	0.048051706	0.319181303
1.1145549569632397e-09	NC_044373.1	42816801	42819799	+	62.4104	2998	Intergenic	Intergenic	-12308	LOC115713437	LOC115713437	XM_030641920	stress response protein NST1-like	protein_coding	0.333047658	1	NA	0.920448172	1	NA
1.2256316408918968e-09	NC_044373.1	39518401	39521599	+	62.3893	3198	TTS	-TTS (LOC115715367)	141	LOC115715367	LOC115715367	XR_004011242	small nucleolar RNA R71	snoRNA	NA	NA	NA	NA	NA	NA
3.9947069323428795e-05	NC_044379.1	276201	277599	+	62.3823	1398	Intergenic	Intergenic	135903	LOC115698860	LOC115698860	XM_030626068	amino acid transporter AVT1I	protein_coding	-3.391531314	0.001859284	0.019698994	-1.423663466	0.584848218	1
0.0005929492674892657-3	NC_044375.1	76714601	76715599	+	62.3574	998	Intergenic	Intergenic	-11057	LOC115720363	LOC115720363	XM_030649515	uncharacterized LOC115720363	protein_coding	1.222142738	0.624834589	1	0.280412484	1	1
0.0005929492674892657-4	NC_044377.1	58336001	58336799	+	62.3574	798	Intergenic	Intergenic	-56820	LOC115724685	LOC115724685	XM_030654024	vicianin hydrolase	protein_coding	6.077698009	7.34E-05	0.001179213	2.629489952	0.007425385	0.064216011
0.0005929492674892657	NC_044375.1	44627801	44628599	+	62.3574	798	Intergenic	Intergenic	-81887	LOC115720120	LOC115720120	XM_030649281	uncharacterized LOC115720120	protein_coding	0.689331956	1	1	0.219661927	1	1
3.0999634067777533e-06-2	NC_044379.1	7390601	7392399	+	62.3574	1798	Intergenic	Intergenic	-17979	LOC115701781	LOC115701781	XR_004008761	small nucleolar RNA R71	snoRNA	NA	NA	NA	NA	NA	NA
0.0005929492674892657-2	NC_044375.1	63951001	63951999	+	62.3574	998	Intergenic	Intergenic	-36666	LOC115720252	LOC115720252	XM_030649408	uncharacterized LOC115720252	protein_coding	NA	NA	NA	NA	NA	NA
3.0999634067777533e-06	NC_044373.1	75966201	75968399	+	62.3574	2198	Intergenic	Intergenic	15712	LOC115712699	LOC115712699	XM_030641029	probable LRR receptor-like serine/threonine-protein kinase At5g10290,	protein_coding	-0.57196114	1	1	-0.409694336	1	1
1.4821355031139647e-09	NC_044374.1	77651401	77654199	+	62.3466	2798	TTS	-TTS (LOC115718320)	246	LOC115718320	LOC115718320	XR_004011899	small nucleolar RNA R71	snoRNA	NA	NA	NA	NA	NA	NA
4.4061444577467515e-05	NC_044371.1	75534001	75535599	+	62.3322	1598	Intergenic	Intergenic	18479	LOC115704371	LOC115704371	XM_030631581	putative RING-H2 finger protein ATL50	protein_coding	NA	NA	NA	NA	NA	NA
4.4061444577467515e-05-3	NW_022060487.1	807401	809199	+	62.3322	1798	NA	NA	NA	NA			#N/A		NA	NA	NA	NA	NA	NA
4.4061444577467515e-05-2	NC_044377.1	76548201	76549599	+	62.3322	1398	Intergenic	Intergenic	-8246	LOC115695892	LOC115695892	XM_030622993	agglutinin-1-like	protein_coding	2.494400559	0.706248257	NA	3.08176376	0.599551283	NA
2.1924588014499656e-08	NC_044378.1	25952601	25955199	+	62.3068	2598	Intergenic	Intergenic	-28199	LOC115698060	LOC115698060	XR_004008030	inactive tetrahydrocannabinolic acid synthase-like	transcribed_pseudogene	2.318231538	0.740009026	NA	2.905596205	0.63143503	NA
3.762103302802141e-06	NC_044370.1	31323201	31324399	+	62.2811	1198	Intergenic	Intergenic	-16025	LOC115703366	LOC115703366	XR_004009138	small nucleolar RNA R71	snoRNA	NA	NA	NA	NA	NA	NA
1.9643054789319332e-10	NC_044370.1	100280001	100283799	+	62.242	3798	Intergenic	Intergenic	-20776	LOC115699955	LOC115699955	XM_030627502	cytochrome P450 CYP82D47	protein_coding	0.883017091	NA	NA	-4.209936329	NA	NA
5.361363354601141e-05-3	NC_044377.1	9760401	9761999	+	62.2288	1598	Intergenic	Intergenic	11305	LOC115695742	LOC115695742	XM_030622816	epidermal growth factor receptor substrate 15,	protein_coding	2.098260929	0.042360808	0.268303729	1.355233866	0.484236336	1
5.361363354601141e-05-4	NC_044378.1	4602801	4604399	+	62.2288	1598	Intergenic	Intergenic	15724	LOC115696266	LOC115696266	XM_030623176	stemmadenine O-acetyltransferase	protein_coding	-1.512629836	0.90002605	NA	0	1	NA
5.361363354601141e-05-2	NC_044373.1	59875801	59877399	+	62.2288	1598	Intergenic	Intergenic	-42341	LOC115715202	LOC115715202	XM_030644044	auxin efflux carrier component 3,	protein_coding	-1.290616308	0.389334714	1	0.436894904	1	1
5.361363354601141e-05	NC_044371.1	69206401	69207399	+	62.2288	998	Intergenic	Intergenic	-189000	LOC115705689	LOC115705689	XM_030633090	transcription factor 25	protein_coding	-0.165541137	1	1	0.125488335	1	1
2.1595326371918695e-10	NC_044373.1	48314001	48316999	+	62.2222	2998	Intergenic	Intergenic	-53384	TRNAQ-UUG_3	TRNAQ-UUG_3	TRNAQ-UUG_3	#N/A	tRNA	NA	NA	NA	NA	NA	NA
0.000724912146704093	NC_044374.1	59573601	59574399	+	62.2022	798	Intergenic	Intergenic	42572	LOC115716857	LOC115716857	XR_004011616	uncharacterized LOC115716857	lncRNA	NA	NA	NA	NA	NA	NA
0.000724912146704093-3	NC_044377.1	62776201	62776999	+	62.2022	798	Intergenic	Intergenic	14616	LOC115724483	LOC115724483	XM_030653774	uncharacterized protein At1g10890,	protein_coding	0.463773004	1	1	0.037447676	1	1
0.000724912146704093-2	NC_044375.1	76259601	76260599	+	62.2022	998	Intergenic	Intergenic	-19705	LOC115720359	LOC115720359	XM_030649511	uncharacterized LOC115720359	protein_coding	NA	NA	NA	NA	NA	NA
1.8053089863045357e-12	NC_044373.1	29393001	29397399	+	62.2022	4398	Intergenic	Intergenic	8631	LOC115715381	LOC115715381	XR_004011256	small nucleolar RNA R71	snoRNA	NA	NA	NA	NA	NA	NA
3.984625458994802e-07	NC_044370.1	59829801	59831599	+	62.1861	1798	Intergenic	Intergenic	-19537	LOC115722709	LOC115722709	XM_030651988	uncharacterized LOC115722709	protein_coding	NA	NA	NA	NA	NA	NA
3.1706678980817867e-09	NC_044378.1	47712401	47714599	+	62.1676	2198	Intergenic	Intergenic	-142347	LOC115698399	LOC115698399	XR_004008148	small nucleolar RNA R71	snoRNA	NA	NA	NA	NA	NA	NA
5.030840677809106e-06	NC_044370.1	90087001	90088999	+	62.1618	1998	Intergenic	Intergenic	-9000	LOC115695058	LOC115695058	XM_030622156	protein FAR-RED IMPAIRED RESPONSE 1-like	protein_coding	NA	NA	NA	NA	NA	NA
5.030840677809106e-06-2	NC_044370.1	92061401	92062799	+	62.1618	1398	Intergenic	Intergenic	14661	LOC115697940	LOC115697940	XM_030625119	uncharacterized LOC115697940,	protein_coding	1.246312724	0.360280864	1	0.118465249	1	1
4.3864680417070014e-07	NC_044378.1	12118601	12120199	+	62.1536	1598	Intergenic	Intergenic	-15963	LOC115697513	LOC115697513	XM_030624548	protein NRT1/ PTR FAMILY 5.6	protein_coding	-1.213830774	0.592184636	1	-1.543427857	0.172954454	0.908728057
4.3864680417070014e-07-2	NC_044379.1	2192401	2194199	+	62.1536	1798	Intergenic	Intergenic	-596489	LOC115698919	LOC115698919	XM_030626122	extracellular ribonuclease LE	protein_coding	6.151631711	1.47E-17	1.49E-15	3.483828726	2.08E-15	9.58E-14
4.828931151168301e-07-2	NC_044378.1	17526801	17528799	+	62.1207	1998	exon	-exon (LOC115696390, exon 2 of 2)	709	LOC115696390	LOC115696390	XM_030623291	uncharacterized LOC115696390	protein_coding	NA	NA	NA	NA	NA	NA
4.828931151168301e-07	NC_044370.1	60464001	60465599	+	62.1207	1598	Intergenic	Intergenic	67254	LOC115722809	LOC115722809	XM_030652141	uncharacterized LOC115722809	protein_coding	NA	NA	NA	NA	NA	NA
6.525095494664444e-05-3	NC_044379.1	49100601	49101999	+	62.1207	1398	Intergenic	Intergenic	19371	LOC115700205	LOC115700205	XM_030627768	uncharacterized LOC115700205	protein_coding	NA	NA	NA	NA	NA	NA
5.542907739728104e-06	NC_044376.1	54030001	54031599	+	62.1207	1598	Intergenic	Intergenic	-153438	LOC115723914	LOC115723914	XM_030653374	uncharacterized LOC115723914	protein_coding	NA	NA	NA	NA	NA	NA
6.525095494664444e-05-2	NC_044374.1	59987601	59988599	+	62.1207	998	Intergenic	Intergenic	456672	LOC115716857	LOC115716857	XR_004011616	uncharacterized LOC115716857	lncRNA	NA	NA	NA	NA	NA	NA
6.525095494664444e-05	NC_044370.1	49742601	49743799	+	62.1207	1198	Intergenic	Intergenic	-83155	LOC115711897	LOC115711897	XM_030640111	outer envelope pore protein 21, chloroplastic	protein_coding	-0.881780829	1	1	-0.309245115	1	1
0.0008016703867105169-2	NC_044378.1	38473401	38474199	+	62.1207	798	intron	-intron (LOC115696550, intron 3 of 3)	5423	LOC115696550	LOC115696550	XM_030623446	uncharacterized LOC115696550	protein_coding	NA	NA	NA	NA	NA	NA
0.0008016703867105169	NC_044370.1	75346001	75346799	+	62.1207	798	Intergenic	Intergenic	20405	LOC115714510	LOC115714510	XM_030643249	serine/threonine-protein kinase tricorner,	protein_coding	-0.024430137	1	1	-0.199547111	1	1
4.217585684631144e-09	NC_044377.1	24684601	24686799	+	62.0969	2198	Intergenic	Intergenic	183552	LOC115695060	LOC115695060	XM_030622157	uncharacterized LOC115695060	protein_coding	NA	NA	NA	NA	NA	NA
4.706668299609105e-08	NC_044371.1	27280401	27282399	+	62.0929	1998	Intergenic	Intergenic	-25177	LOC115706803	LOC115706803	XR_004009654	uncharacterized LOC115706803	lncRNA	NA	NA	NA	NA	NA	NA
6.107291766152924e-06	NC_044372.1	4042401	4043799	+	62.0789	1398	Intergenic	Intergenic	-6775	LOC115709732	LOC115709732	XM_030637915	pre-mRNA-splicing factor ATP-dependent RNA helicase DEAH7,	protein_coding	-0.185702484	1	1	-0.002658134	1	1
7.199123774592472e-05	NC_044370.1	90652601	90654199	+	62.0648	1598	Intergenic	Intergenic	-47750	LOC115711331	LOC115711331	XR_004010463	uncharacterized LOC115711331	lncRNA	NA	NA	NA	NA	NA	NA
7.199123774592472e-05-2	NC_044372.1	49853801	49854999	+	62.0648	1198	Intergenic	Intergenic	-3347	LOC115709215	LOC115709215	XM_030637272	60S ribosomal protein L24-like	protein_coding	-0.331426815	1	1	-0.715550029	1	1
5.1785965002715194e-08	NW_022060454.1	1479001	1481799	+	62.0648	2798	Intergenic	Intergenic	-21792	LOC115702125	LOC115702125	XM_030629583	#N/A	protein_coding	2.642988593	0.003486277	0.033308503	3.285318001	4.97E-05	0.000699547
7.199123774592472e-05-3	NC_044376.1	33199401	33200799	+	62.0648	1398	Intergenic	Intergenic	-23009	LOC115722211	LOC115722211	XM_030651356	uncharacterized LOC115722211	protein_coding	0.165640745	1	1	-0.065877151	1	1
0.0008866649142787082-2	NC_044378.1	6875001	6875799	+	62.0363	798	TTS	-TTS (LOC115696285)	2423	LOC115696285	LOC115696285	XM_030623194	uncharacterized LOC115696285	protein_coding	NA	NA	NA	NA	NA	NA
6.729361278630136e-06-2	NC_044377.1	17918001	17919599	+	62.0363	1598	Intergenic	Intergenic	-3388	LOC115725310	LOC115725310	XM_030654780	methyltransferase N6AMT1	protein_coding	-0.308241144	1	1	-0.260239284	1	1
6.729361278630136e-06	NC_044373.1	31114601	31116399	+	62.0363	1798	Intergenic	Intergenic	26574	LOC115713327	LOC115713327	XM_030641807	uncharacterized mitochondrial protein AtMg00810-like	protein_coding	NA	NA	NA	NA	NA	NA
0.0008866649142787082	NC_044376.1	44693201	44693999	+	62.0363	798	Intergenic	Intergenic	18599	LOC115723335	LOC115723335	XM_030652772	protein FAR1-RELATED SEQUENCE 5,	protein_coding	0.11186612	1	1	-0.147530193	1	1
4.636804305724405e-12	NC_044372.1	90838401	90841199	+	62.0363	2798	Intergenic	Intergenic	-7141	LOC115709111	LOC115709111	XM_030637145	peroxidase 3-like	protein_coding	3.59510467	0.411594994	NA	4.182480662	0.313960351	1
6.443349954843395e-07	NC_044377.1	40945001	40946599	+	62.0191	1598	Intergenic	Intergenic	-29992	LOC115725313	LOC115725313	XR_004013366	uncharacterized LOC115725313	lncRNA	NA	NA	NA	NA	NA	NA
5.572174241812081e-10	NC_044377.1	44024201	44026999	+	62.0148	2798	Intergenic	Intergenic	-78432	LOC115695668	LOC115695668	XM_030622727	uncharacterized protein At1g66480	protein_coding	-0.071708717	1	1	-3.239340754	1.77E-07	3.64E-06
7.943241425293189e-05	NC_044374.1	26483801	26484799	+	62.0076	998	Intergenic	Intergenic	81424	LOC115716389	LOC115716389	XM_030645174	zinc finger protein ZAT1	protein_coding	2.415481006	1.67E-06	3.81E-05	2.191913367	3.44E-05	0.000496889
6.170759458468723e-09	NC_044372.1	68387601	68390599	+	61.9993	2998	Intergenic	Intergenic	-12881	LOC115711506	LOC115711506	XM_030639851	thylakoid membrane protein TERC, chloroplastic,	protein_coding	-1.317050529	0.085909927	0.470363579	0.69881123	1	1
7.415038521824327e-06-3	NC_044377.1	26943601	26944399	+	61.9931	798	Intergenic	Intergenic	-23906	LOC115695071	LOC115695071	XM_030622165	uncharacterized LOC115695071	protein_coding	NA	NA	NA	NA	NA	NA
7.415038521824327e-06	NC_044373.1	19613801	19615399	+	61.9931	1598	Intergenic	Intergenic	19219	LOC115715403	LOC115715403	XR_004011277	small nucleolar RNA R71	snoRNA	NA	NA	NA	NA	NA	NA
7.415038521824327e-06-2	NC_044375.1	39673001	39674799	+	61.9931	1798	Intergenic	Intergenic	-7115	LOC115721051	LOC115721051	XM_030650282	zinc finger protein ZAT12	protein_coding	2.711013771	0.016174072	0.120369409	2.649415749	0.019883497	0.150893309
7.415038521824327e-06-4	NC_044379.1	22340801	22342599	+	61.9931	1798	Intergenic	Intergenic	-113537	LOC115698904	LOC115698904	XM_030626103	#N/A	protein_coding	0.410947537	1	NA	0.036563417	1	NA
0.0009807948271670418-3	NW_022060487.1	571801	572399	+	61.949	598	NA	NA	NA	NA			#N/A		NA	NA	NA	NA	NA	NA
0.0009807948271670418-2	NC_044371.1	66904801	66905599	+	61.949	798	Intergenic	Intergenic	-16144	LOC115706225	LOC115706225	XM_030633803	cytochrome P450 78A3	protein_coding	2.02355266	0.007678875	0.064826973	4.522716539	5.62E-20	3.81E-18
0.0009807948271670418	NC_044370.1	20947601	20948199	+	61.949	598	Intergenic	Intergenic	-39297	LOC115705968	LOC115705968	XR_004009530	uncharacterized LOC115705968	lncRNA	0.45354106	1	1	0.912904593	1	1
7.590418573219502e-08	NC_044375.1	17652801	17654799	+	61.949	1998	Intergenic	Intergenic	-38643	LOC115719926	LOC115719926	XM_030649098	uncharacterized LOC115719926	protein_coding	NA	NA	NA	NA	NA	NA
7.595897208621344e-14	NC_044377.1	70494401	70498599	+	61.949	4198	promoter-TSS	-promoter-TSS (LOC115695439)	-444	LOC115695439	LOC115695439	XM_030622505	uncharacterized LOC115695439	protein_coding	0.410947537	1	NA	0.998328082	1	NA
8.764795737861853e-05-2	NC_044379.1	43115001	43116199	+	61.949	1198	Intergenic	Intergenic	-13768	LOC115700139	LOC115700139	XM_030627701	uncharacterized protein At4g26485	protein_coding	-1.512629836	0.90002605	NA	-0.925225269	1	NA
8.764795737861853e-05	NC_044378.1	49372801	49374199	+	61.949	1398	Intergenic	Intergenic	-9060	LOC115697836	LOC115697836	XM_030624978	berberine bridge enzyme-like 26	protein_coding	3.08540456	0.000118462	0.001811604	0.407931654	1	1
9.004024560861512e-06	NC_044372.1	52650201	52651999	+	61.9042	1798	Intergenic	Intergenic	-90507	LOC115710761	LOC115710761	XM_030639114	uncharacterized LOC115710761	protein_coding	NA	NA	NA	NA	NA	NA
8.953001958714798e-10	NC_044374.1	52088801	52090999	+	61.9042	2198	Intergenic	Intergenic	5878	LOC115717834	LOC115717834	XM_030646805	ATP synthase subunit 9, mitochondrial	protein_coding	0.410947537	1	NA	0.998328082	1	NA
9.671911871142523e-05-3	NC_044379.1	21506601	21507599	+	61.8891	998	Intergenic	Intergenic	-40152	LOC115701602	LOC115701602	XR_004008596	small nucleolar RNA R71	snoRNA	NA	NA	NA	NA	NA	NA
9.671911871142523e-05-2	NC_044375.1	59072401	59073399	+	61.8891	998	Intergenic	Intergenic	-78813	LOC115721040	LOC115721040	XR_004012363	uncharacterized LOC115721040	lncRNA	NA	NA	NA	NA	NA	NA
9.671911871142523e-05	NC_044370.1	92137201	92138199	+	61.8891	998	Intergenic	Intergenic	19589	LOC115697967	LOC115697967	XM_030625146	ethylene-responsive transcription factor SHINE 2	protein_coding	5.981452599	0.007688767	0.064881984	1.507794984	0.733210379	1
1.2010992193285173e-12	NC_044370.1	90969001	90972999	+	61.867	3998	Intergenic	Intergenic	-26400	LOC115697684	LOC115697684	XM_030624779	uncharacterized LOC115697684,	protein_coding	0.235487102	1	1	-0.358498	1	1
0.0010850596188647181-4	NW_022060460.1	5601	6399	+	61.8586	798	Intergenic	Intergenic	-25108	LOC115702135	LOC115702135	XR_004008805	#N/A	snoRNA	NA	NA	NA	NA	NA	NA
0.0010850596188647181-2	NC_044378.1	53274801	53275399	+	61.8586	598	Intergenic	Intergenic	-70873	LOC115696649	LOC115696649	XM_030623540	uncharacterized LOC115696649	protein_coding	NA	NA	NA	NA	NA	NA
0.0010850596188647181	NC_044378.1	22739801	22740599	+	61.8586	798	Intergenic	Intergenic	-3009	LOC115696432	LOC115696432	XM_030623334	uncharacterized LOC115696432	protein_coding	NA	NA	NA	NA	NA	NA
0.0010850596188647181-3	NC_044379.1	6535401	6535999	+	61.8586	598	Intergenic	Intergenic	67946	LOC115701573	LOC115701573	XR_004008577	uncharacterized LOC115701573,	lncRNA	-0.08431646	1	1	0.198953885	1	1
9.922494265405974e-06	NC_044377.1	47972401	47973599	+	61.8586	1198	Intergenic	Intergenic	-19336	LOC115696083	LOC115696083	XR_004007681	small nucleolar RNA R71	snoRNA	NA	NA	NA	NA	NA	NA
0.00010673576227218233-2	NC_044377.1	11423201	11424199	+	61.8278	998	Intergenic	Intergenic	80384	LOC115724749	LOC115724749	XM_030654086	uncharacterized LOC115724749,	protein_coding	1.196415169	0.612813481	1	-0.584900594	1	1
0.00010673576227218233-3	NC_044377.1	41107001	41107999	+	61.8278	998	Intergenic	Intergenic	6497	LOC115724718	LOC115724718	XR_004013262	uncharacterized LOC115724718	lncRNA	NA	NA	NA	NA	NA	NA
0.00010673576227218233	NC_044372.1	26551801	26553199	+	61.8278	1398	Intergenic	Intergenic	37091	LOC115711201	LOC115711201	XM_030639526	transcription factor PRE3	protein_coding	5.163487515	0.068340889	0.392295695	5.750876908	0.03753269	0.259374393
1.0935041068968377e-05	NW_022060487.1	534601	535999	+	61.8122	1398	NA	NA	NA	NA			#N/A		NA	NA	NA	NA	NA	NA
1.4346243898021744e-10	NC_044379.1	1683601	1686399	+	61.807	2798	Intergenic	Intergenic	-1104789	LOC115698919	LOC115698919	XM_030626122	extracellular ribonuclease LE	protein_coding	6.151631711	1.47E-17	1.49E-15	3.483828726	2.08E-15	9.58E-14
1.1478367295755426e-06	NC_044372.1	59845401	59846999	+	61.8028	1598	Intergenic	Intergenic	-64172	LOC115711352	LOC115711352	XM_030639689	protein SRC2	protein_coding	0.59773863	1	1	-0.182867395	1	1
1.1478367295755426e-06-3	NC_044376.1	4925601	4927999	+	61.8028	2398	Intergenic	Intergenic	-9472	LOC115722928	LOC115722928	XM_030652310	probable WRKY transcription factor 48	protein_coding	0.837107717	1	1	1.078260844	0.77428147	1
1.1478367295755426e-06-2	NC_044374.1	71961001	71963399	+	61.8028	2398	Intergenic	Intergenic	3884	LOC115717239	LOC115717239	XR_004011716	uncharacterized LOC115717239	lncRNA	3.402325597	0.073405855	0.41575744	1.914222637	0.363933478	1
1.593623991003779e-30	NC_044376.1	61548401	61558999	+	61.7839	10598	Intergenic	Intergenic	-5677	LOC115724051	LOC115724051	XM_030653504	uncharacterized LOC115724051	protein_coding	NA	NA	NA	NA	NA	NA
1.9237960281665904e-12	NC_044372.1	30824201	30826799	+	61.7822	2598	Intergenic	Intergenic	-13699	LOC115709700	LOC115709700	XM_030637870	uncharacterized PKHD-type hydroxylase At1g22950,	protein_coding	-0.071062113	1	1	-0.36889352	1	1
1.205134776462563e-05-2	NC_044377.1	69350001	69351199	+	61.7649	1198	Intergenic	Intergenic	-6590	LOC115695420	LOC115695420	XM_030622485	uncharacterized LOC115695420	protein_coding	NA	NA	NA	NA	NA	NA
1.205134776462563e-05	NC_044374.1	60171401	60173399	+	61.7649	1998	Intergenic	Intergenic	-283755	LOC115717877	LOC115717877	XM_030646848	uncharacterized LOC115717877	protein_coding	NA	NA	NA	NA	NA	NA
0.0012005707328860149	NC_044372.1	26345201	26345799	+	61.7649	598	Intergenic	Intergenic	-60357	LOC115710576	LOC115710576	XM_030638936	uncharacterized LOC115710576	protein_coding	NA	NA	NA	NA	NA	NA
0.0012005707328860149-2	NC_044374.1	15195401	15196199	+	61.7649	798	Intergenic	Intergenic	49082	LOC115717598	LOC115717598	XM_030646581	uncharacterized LOC115717598	protein_coding	NA	NA	NA	NA	NA	NA
1.581993555896749e-09	NC_044373.1	42868401	42871199	+	61.7649	2798	Intergenic	Intergenic	39192	LOC115713437	LOC115713437	XM_030641920	stress response protein NST1-like	protein_coding	0.333047658	1	NA	0.920448172	1	NA
0.0012005707328860149-3	NC_044376.1	24817001	24817799	+	61.7649	798	intron	-intron (LOC115723212, intron 1 of 1)	5589	LOC115723212	LOC115723212	XR_004012917	uncharacterized LOC115723212	lncRNA	0.38542057	1	NA	0.033082772	1	1
1.26388712371396e-06	NW_022060430.1	9201	10999	+	61.7649	1798	NA	NA	NA	NA			#N/A		NA	NA	NA	NA	NA	NA
0.00011779728903212619	NC_044378.1	2569601	2570999	+	61.7649	1398	Intergenic	Intergenic	8887	LOC115697131	LOC115697131	XM_030624046	exocyst complex component EXO84A	protein_coding	5.404003573	0.001733899	0.018527375	0.449847509	1	1
1.482857863564237e-07	NC_044372.1	61812801	61815199	+	61.7329	2398	Intergenic	Intergenic	10629	LOC115710834	LOC115710834	XM_030639187	uncharacterized protein K02A2.6-like	protein_coding	0.410947537	1	NA	0.998328082	1	NA
1.39170234187373e-06	NC_044374.1	36749001	36750799	+	61.7265	1798	Intergenic	Intergenic	12843	LOC115717723	LOC115717723	XM_030646703	uncharacterized LOC115717723	protein_coding	NA	NA	NA	NA	NA	NA
1.3282099442019764e-05-2	NC_044374.1	27309801	27311399	+	61.7168	1598	Intergenic	Intergenic	28747	LOC115715840	LOC115715840	XR_004011454	uncharacterized LOC115715840,	lncRNA	1.363844576	0.908374831	NA	-0.798944245	1	NA
1.3282099442019764e-05-3	NC_044376.1	11832401	11834599	+	61.7168	2198	Intergenic	Intergenic	21016	LOC115724234	LOC115724234	XR_004013036	small nucleolar RNA R71	snoRNA	NA	NA	NA	NA	NA	NA
1.3282099442019764e-05	NC_044373.1	44709201	44710999	+	61.7168	1798	Intergenic	Intergenic	-39511	LOC115715238	LOC115715238	XM_030644076	systemin receptor SR160	protein_coding	-0.201263752	1	1	-0.08752038	1	1
1.3282099442019764e-05-4	NW_022060417.1	45201	46799	+	61.7168	1598	Intergenic	Intergenic	-37236	LOC115702063	LOC115702063	XM_030629513	#N/A	protein_coding	NA	NA	NA	NA	NA	NA
0.00013001366227138108	NC_044372.1	19270001	19270999	+	61.7005	998	promoter-TSS	-promoter-TSS (LOC115711347)	-837	LOC115711347	LOC115711347	XM_030639683	uncharacterized LOC115711347	protein_coding	1.353235575	0.867937132	NA	-0.189985668	1	1
1.532478739735865e-06	NC_044371.1	54828601	54830199	+	61.6874	1598	Intergenic	Intergenic	-82073	LOC115704145	LOC115704145	XM_030631362	uncharacterized LOC115704145	protein_coding	NA	NA	NA	NA	NA	NA
5.6399850416062696e-15	NW_022060476.1	935601	940599	+	61.6677	4998	Intergenic	Intergenic	206300	LOC115702188	LOC115702188	XM_030629636	#N/A	protein_coding	NA	NA	NA	NA	NA	NA
0.00132856450192186	NC_044374.1	57237401	57237999	+	61.6677	598	Intergenic	Intergenic	123930	LOC115718233	LOC115718233	XR_004011817	small nucleolar RNA R71	snoRNA	NA	NA	NA	NA	NA	NA
1.6875347595228903e-06	NC_044377.1	31550801	31552799	+	61.6479	1998	Intergenic	Intergenic	-23476	LOC115725207	LOC115725207	XM_030654645	probable galacturonosyltransferase 12	protein_coding	3.943157279	0.000647383	0.00808094	2.292068268	0.123149966	0.691442345
1.6135327317609747e-05	NC_044378.1	4197601	4198999	+	61.6178	1398	Intergenic	Intergenic	-10361	LOC115697065	LOC115697065	XR_004007869	uncharacterized LOC115697065	lncRNA	NA	NA	NA	NA	NA	NA
3.36249826675675e-10	NC_044370.1	35080601	35083399	+	61.6122	2798	Intergenic	Intergenic	-44606	LOC115710391	LOC115710391	XM_030638759	receptor-like protein kinase 7	protein_coding	-0.612307614	1	1	-1.598453093	0.029182877	0.20887453
1.858323439654943e-06	NC_044377.1	9198801	9200999	+	61.6077	2198	Intergenic	Intergenic	6835	LOC115694949	LOC115694949	XM_030622052	uncharacterized LOC115694949	protein_coding	NA	NA	NA	NA	NA	NA
2.174878164451942e-07	NC_044371.1	54550401	54552199	+	61.6009	1798	Intergenic	Intergenic	-360173	LOC115704145	LOC115704145	XM_030631362	uncharacterized LOC115704145	protein_coding	NA	NA	NA	NA	NA	NA
2.8322799687610964e-08	NC_044378.1	48270601	48272799	+	61.5669	2198	Intergenic	Intergenic	136994	LOC115696946	LOC115696946	XR_004007835	uncharacterized LOC115696946, 1	lncRNA	-0.625387096	1	1	-0.189194205	1	1
1.778518136162265e-05	NC_044370.1	86405601	86407199	+	61.5669	1598	Intergenic	Intergenic	14631	LOC115725693	LOC115725693	XM_030655287	zinc finger BED domain-containing protein DAYSLEEPER-like	protein_coding	NA	NA	NA	NA	NA	NA
0.0001584105619674568	NC_044379.1	6038201	6039199	+	61.5669	998	Intergenic	Intergenic	9841	LOC115699239	LOC115699239	XM_030626534	uncharacterized LOC115699239	protein_coding	NA	NA	NA	NA	NA	NA
1.778518136162265e-05-2	NC_044372.1	33074601	33076599	+	61.5669	1998	Intergenic	Intergenic	13571	LOC115710297	LOC115710297	XM_030638663	ATP-dependent RNA helicase DEAH13,	protein_coding	-0.514085152	1	1	-0.768457378	1	1
0.0014704166471120098	NC_044371.1	64348001	64348599	+	61.5669	598	Intergenic	Intergenic	-28165	LOC115708392	LOC115708392	XR_004009893	small nucleolar RNA R71	snoRNA	NA	NA	NA	NA	NA	NA
0.0014704166471120098-2	NC_044373.1	14570001	14570599	+	61.5669	598	Intergenic	Intergenic	-56734	LOC115713375	LOC115713375	XM_030641857	DNA damage-repair/toleration protein DRT100	protein_coding	7.070317536	NA	NA	2.548389806	NA	NA
0.0014704166471120098-4	NC_044374.1	56985201	56985799	+	61.5669	598	Intergenic	Intergenic	22282	LOC115716353	LOC115716353	XM_030645131	#N/A	protein_coding	-2.682177321	0.008411021	0.070005568	1.838348962	0.202641614	1
0.0014704166471120098-3	NC_044373.1	32301001	32301799	+	61.5669	798	Intergenic	Intergenic	10969	LOC115715113	LOC115715113	XM_030643922	ethylene-responsive transcription factor ERF062	protein_coding	0.927384995	1	1	-1.316648643	0.635977158	1
3.7177541971520403e-09	NC_044375.1	43226801	43229599	+	61.5411	2798	Intergenic	Intergenic	-566795	LOC115721317	LOC115721317	XM_030650591	tropomyosin-2-like	protein_coding	0.234417585	1	1	-1.706036753	0.502563852	1
2.2536681221869964e-06	NC_044373.1	67776801	67778199	+	61.5255	1398	Intergenic	Intergenic	18739	LOC115715244	LOC115715244	XM_030644084	homeobox-leucine zipper protein ATHB-6	protein_coding	0.45114219	1	1	0.258207623	1	1
1.9604504665266066e-05-2	NC_044379.1	19815001	19816199	+	61.515	1198	Intergenic	Intergenic	-20557	LOC115699907	LOC115699907	XM_030627451	uncharacterized LOC115699907	protein_coding	NA	NA	NA	NA	NA	NA
1.9604504665266066e-05	NC_044374.1	59399401	59400599	+	61.515	1198	Intergenic	Intergenic	68883	LOC115718308	LOC115718308	XR_004011887	small nucleolar RNA R71	snoRNA	NA	NA	NA	NA	NA	NA
0.00017487470014586814	NC_044373.1	90838001	90838999	+	61.4975	998	Intergenic	Intergenic	-18767	LOC115713890	LOC115713890	XM_030642370	exocyst complex component EXO84B-like	protein_coding	1.183474883	0.963862251	NA	1.770848997	0.849029162	NA
2.899073084121066e-07	NC_044379.1	23860001	23862199	+	61.4975	2198	Intergenic	Intergenic	72237	LOC115701358	LOC115701358	XM_030629134	NAC domain-containing protein 2	protein_coding	0.268952856	1	1	0.240688526	1	1
3.1906671687959836e-07	NC_044378.1	48140801	48142599	+	61.4621	1798	Intergenic	Intergenic	6994	LOC115696946	LOC115696946	XR_004007835	uncharacterized LOC115696946, 1	lncRNA	-0.625387096	1	1	-0.189194205	1	1
0.0016276585365260633-4	NW_022060461.1	87601	88199	+	61.4621	598	Intergenic	Intergenic	44942	LOC115702137	LOC115702137	XM_030629593	#N/A	protein_coding	NA	NA	NA	NA	NA	NA
0.0016276585365260633-2	NC_044375.1	85199001	85199599	+	61.4621	598	intron	-intron (LOC115720853, intron 1 of 1)	-3791	LOC115721378	LOC115721378	XR_004012447	uncharacterized LOC115721378	lncRNA	NA	NA	NA	NA	NA	NA
0.0016276585365260633	NC_044370.1	102495401	102495999	+	61.4621	598	Intergenic	Intergenic	-22484	LOC115701007	LOC115701007	XR_004008484	uncharacterized LOC115701007	lncRNA	-0.235672563	1	1	-2.007977573	0.318286562	1
0.0016276585365260633-3	NC_044376.1	58130401	58130999	+	61.4621	598	promoter-TSS	-promoter-TSS (LOC115724189)	-1472	LOC115724189	LOC115724189	XM_030653663	probable glycosyltransferase At5g03795	protein_coding	10.00919749	9.92E-14	6.38E-12	8.142644117	9.34E-28	1.15E-25
4.147374294144346e-08	NC_044370.1	38795601	38798999	+	61.4468	3398	Intergenic	Intergenic	-53835	LOC115705780	LOC115705780	XR_004009495	uncharacterized LOC115705780	lncRNA	NA	NA	NA	NA	NA	NA
2.7333900496861523e-06	NC_044373.1	27122201	27123999	+	61.4407	1798	Intergenic	Intergenic	20779	LOC115714500	LOC115714500	XM_030643225	uncharacterized LOC115714500	protein_coding	-1.118023294	0.617886368	1	0.572228943	1	1
5.436169575254273e-09	NC_044378.1	23179801	23183799	+	61.4353	3998	Intergenic	Intergenic	28865	LOC115696950	LOC115696950	XR_004007841	uncharacterized LOC115696950	lncRNA	NA	NA	NA	NA	NA	NA
1.5417977228001568e-12	NC_044370.1	36038601	36042199	+	61.4263	3598	Intergenic	Intergenic	-88548	LOC115720095	LOC115720095	XM_030649261	uncharacterized LOC115720095	protein_coding	NA	NA	NA	NA	NA	NA
2.3823382947270678e-05	NC_044372.1	56287001	56288999	+	61.4082	1998	Intergenic	Intergenic	28457	LOC115710789	LOC115710789	XM_030639138	uncharacterized LOC115710789	protein_coding	NA	NA	NA	NA	NA	NA
2.3823382947270678e-05-3	NC_044375.1	51741001	51742599	+	61.4082	1598	Intergenic	Intergenic	-48721	LOC115721263	LOC115721263	XM_030650526	probable E3 ubiquitin-protein ligase ARI8	protein_coding	-0.221074768	1	1	-0.305071772	1	1
2.3823382947270678e-05-2	NC_044374.1	34294401	34295799	+	61.4082	1398	Intergenic	Intergenic	28405	LOC115717709	LOC115717709	XR_004011761	probable xyloglucan endotransglucosylase/hydrolase protein 30	transcribed_pseudogene	2.901177032	0.000302648	0.004167485	5.096356881	1.15E-12	4.22E-11
3.010398139332237e-06	NC_044375.1	23898801	23899799	+	61.3973	998	Intergenic	Intergenic	12905	LOC115720897	LOC115720897	XM_030650101	ubiquitin recognition factor in ER-associated degradation protein 1	protein_coding	-1.558915548	0.101748945	0.536162274	-0.130947172	1	1
0.000213160598068581	NC_044370.1	21853201	21853999	+	61.3533	798	Intergenic	Intergenic	-21858	LOC115706519	LOC115706519	XR_004009598	uncharacterized LOC115706519	lncRNA	NA	NA	NA	NA	NA	NA
0.000213160598068581-3	NW_022060453.1	37601	38399	+	61.3533	798	Intergenic	Intergenic	-11923	LOC115702118	LOC115702118	XM_030629576	#N/A	protein_coding	NA	NA	NA	NA	NA	NA
0.000213160598068581-2	NC_044370.1	97269401	97270199	+	61.3533	798	Intergenic	Intergenic	-13913	LOC115699010	LOC115699010	XM_030626223	serine hydroxymethyltransferase 7	protein_coding	-0.255287333	1	1	0.39169745	1	1
2.6263587783054253e-05	NC_044370.1	31716801	31718599	+	61.3533	1798	Intergenic	Intergenic	137467	LOC115703275	LOC115703275	XR_004009052	small nucleolar RNA R71	snoRNA	NA	NA	NA	NA	NA	NA
0.0018019954293124552	NC_044371.1	45165801	45166399	+	61.3533	598	Intergenic	Intergenic	16123	LOC115705534	LOC115705534	XM_030632887	E3 ubiquitin-protein ligase KEG	protein_coding	-0.092353103	1	1	-0.204495318	1	1
7.229195451398914e-09	NC_044371.1	42981801	42984399	+	61.3533	2598	Intergenic	Intergenic	18304	LOC115708374	LOC115708374	XR_004009874	small nucleolar RNA R71	snoRNA	NA	NA	NA	NA	NA	NA
7.229195451398914e-09-2	NC_044379.1	18797201	18799999	+	61.3533	2798	Intergenic	Intergenic	7457	LOC115699590	LOC115699590	XM_030627078	uncharacterized LOC115699590	protein_coding	0.166417741	1	1	0.248434862	1	1
3.651761406699739e-06-2	NC_044378.1	39080601	39081999	+	61.3086	1398	Intergenic	Intergenic	-12390	LOC115696556	LOC115696556	XM_030623451	uncharacterized LOC115696556	protein_coding	NA	NA	NA	NA	NA	NA
3.651761406699739e-06	NC_044374.1	48626401	48628199	+	61.3086	1798	Intergenic	Intergenic	2527	LOC115717808	LOC115717808	XM_030646780	uncharacterized LOC115717808	protein_coding	NA	NA	NA	NA	NA	NA
1.1517430387613736e-09	NC_044370.1	20987801	20990399	+	61.3035	2598	Intergenic	Intergenic	14260	LOC115705991	LOC115705991	XM_030633488	pentatricopeptide repeat-containing protein At4g33170	protein_coding	0.152005847	1	1	0.073781599	1	1
2.8954962752068793e-05	NC_044371.1	6563201	6564399	+	61.2973	1198	Intergenic	Intergenic	16687	LOC115704335	LOC115704335	XM_030631545	indole-3-pyruvate monooxygenase YUCCA2	protein_coding	-2.396303304	2.42E-06	5.37E-05	7.994496621	8.27E-09	1.99E-07
0.00023536701043300393-3	NC_044376.1	53006801	53007799	+	61.2783	998	Intergenic	Intergenic	-240436	LOC115724380	LOC115724380	XR_004013173	small nucleolar RNA R71	snoRNA	NA	NA	NA	NA	NA	NA
0.00023536701043300393-2	NC_044373.1	66481001	66482399	+	61.2783	1398	Intergenic	Intergenic	22711	LOC115714066	LOC115714066	XM_030642600	UBP1-associated protein 2A	protein_coding	-0.486813288	1	1	-0.195618893	1	1
5.153519422123224e-07	NC_044377.1	65897401	65899399	+	61.2783	1998	Intergenic	Intergenic	-10614	LOC115724616	LOC115724616	XM_030653940	uncharacterized LOC115724616	protein_coding	-0.592701958	1	1	-0.895059675	1	1
0.00023536701043300393	NC_044370.1	59689601	59690399	+	61.2783	798	Intergenic	Intergenic	9513	LOC115722700	LOC115722700	XM_030651982	uncharacterized LOC115722700	protein_coding	NA	NA	NA	NA	NA	NA
0.00023536701043300393-4	NC_044377.1	24816601	24817399	+	61.2783	798	Intergenic	Intergenic	52252	LOC115695060	LOC115695060	XM_030622157	uncharacterized LOC115695060	protein_coding	NA	NA	NA	NA	NA	NA
9.614354512079664e-09	NW_022060417.1	1377201	1380399	+	61.2688	3198	Intergenic	Intergenic	18831	LOC115702077	LOC115702077	XR_004008793	#N/A	snoRNA	NA	NA	NA	NA	NA	NA
4.02215545904924e-06	NC_044370.1	90459201	90460799	+	61.2631	1598	promoter-TSS	-promoter-TSS (LOC115697565)	-1066	LOC115697565	LOC115697565	XR_004007958	uncharacterized LOC115697565,	lncRNA	0.749613363	1	1	-0.228430723	1	1
7.351588725138148e-08	NC_044371.1	1107601	1109599	+	61.2565	1998	Intergenic	Intergenic	13686	LOC115706647	LOC115706647	XM_030634363	ATP-dependent DNA helicase SRS2-like protein At4g25120	protein_coding	0.351981515	1	1	-0.599599559	1	1
0.0019953269634785022-2	NC_044376.1	51722601	51723199	+	61.2401	598	Intergenic	Intergenic	-42684	TRNAS-AGA_7	TRNAS-AGA_7	TRNAS-AGA_7	#N/A	tRNA	NA	NA	NA	NA	NA	NA
0.0019953269634785022	NC_044373.1	22283201	22283799	+	61.2401	598	Intergenic	Intergenic	18190	LOC115713245	LOC115713245	XM_030641728	uncharacterized LOC115713245	protein_coding	NA	NA	NA	NA	NA	NA
3.192351069871453e-05-2	NC_044374.1	54964601	54965599	+	61.2401	998	Intergenic	Intergenic	52796	LOC115715906	LOC115715906	XR_004011477	uncharacterized LOC115715906	lncRNA	NA	NA	NA	NA	NA	NA
3.192351069871453e-05	NC_044373.1	6220401	6221999	+	61.2401	1598	Intergenic	Intergenic	5381	LOC115712254	LOC115712254	XM_030640509	protein JINGUBANG	protein_coding	-1.509874719	0.025813629	0.177600357	4.052543636	3.28E-19	2.06E-17
3.2535009536608535e-11	NC_044376.1	14365801	14369199	+	61.2084	3398	Intergenic	Intergenic	-12443	LOC115723067	LOC115723067	XM_030652475	ATP-dependent DNA helicase 2 subunit KU70-like,	protein_coding	-1.951473631	0.049325741	0.302259715	-0.897336582	1	1
0.00025990689504348764	NC_044372.1	22680401	22681799	+	61.2014	1398	promoter-TSS	-promoter-TSS (LOC115710328)	-746	LOC115710328	LOC115710328	XR_004010390	uncharacterized LOC115710328	lncRNA	-1.087537632	0.85636228	1	-0.658570849	1	1
3.51979451539662e-05	NC_044378.1	15862001	15863399	+	61.1818	1398	Intergenic	Intergenic	30893	LOC115696372	LOC115696372	XM_030623273	uncharacterized LOC115696372	protein_coding	NA	NA	NA	NA	NA	NA
1.8498078669291289e-09	NW_022060381.1	3801	6399	+	61.1752	2598	Intergenic	Intergenic	3129	LOC115702035	LOC115702035	XR_004008780	#N/A	rRNA	NA	NA	NA	NA	NA	NA
2.6900492616423523e-10	NC_044376.1	38366801	38369599	+	61.17	2798	Intergenic	Intergenic	1122	LOC115724362	LOC115724362	XR_004013155	small nucleolar RNA R71	snoRNA	NA	NA	NA	NA	NA	NA
1.5466059845427264e-08	NC_044377.1	24650201	24652799	+	61.1223	2598	Intergenic	Intergenic	217752	LOC115695060	LOC115695060	XM_030622157	uncharacterized LOC115695060	protein_coding	NA	NA	NA	NA	NA	NA
0.002209770181599125-2	NC_044376.1	45791001	45791599	+	61.1223	598	Intergenic	Intergenic	18067	LOC115723864	LOC115723864	XM_030653329	uncharacterized LOC115723864	protein_coding	NA	NA	NA	NA	NA	NA
0.0002870281006498575-3	NC_044375.1	70039801	70040599	+	61.1223	798	Intergenic	Intergenic	-36151	LOC115720599	LOC115720599	XM_030649747	protein DJ-1 homolog D	protein_coding	-0.609806618	1	1	-0.189028904	1	1
0.0002870281006498575-6	NC_044376.1	56313401	56314399	+	61.1223	998	Intergenic	Intergenic	-8250	LOC115722070	LOC115722070	XM_030651185	uncharacterized LOC115722070,	protein_coding	0.540307867	1	1	-0.796804174	1	1
0.002209770181599125	NC_044370.1	27756001	27756599	+	61.1223	598	intron	-intron (LOC115708781, intron 3 of 4)	-22110	LOC115708763	LOC115708763	XM_030636779	tryptophan aminotransferase-related protein 3	protein_coding	NA	NA	NA	NA	NA	NA
0.0002870281006498575-2	NC_044375.1	62218601	62219399	+	61.1223	798	Intergenic	Intergenic	-157755	LOC115720242	LOC115720242	XM_030649399	uncharacterized LOC115720242	protein_coding	NA	NA	NA	NA	NA	NA
0.0002870281006498575	NC_044372.1	52726201	52727199	+	61.1223	998	Intergenic	Intergenic	104079	LOC115710762	LOC115710762	XM_030639115	uncharacterized LOC115710762	protein_coding	NA	NA	NA	NA	NA	NA
0.0002870281006498575-5	NC_044376.1	50005401	50006399	+	61.1223	998	Intergenic	Intergenic	3865	LOC115722288	LOC115722288	XM_030651457	calmodulin-like protein 7	protein_coding	1.899079138	0.000150422	0.002238045	1.804551631	0.000610723	0.007006195
0.0002870281006498575-4	NC_044376.1	44225401	44226599	+	61.1223	1198	Intergenic	Intergenic	-31688	LOC115724301	LOC115724301	XR_004013099	small nucleolar RNA R71	snoRNA	NA	NA	NA	NA	NA	NA
5.375256417250743e-06	NC_044377.1	6973401	6974799	+	61.1223	1398	Intergenic	Intergenic	7027	LOC115725515	LOC115725515	XM_030655066	uncharacterized LOC115725515	protein_coding	-1.094497685	0.84303171	1	-2.813138332	0.000126948	0.001642468
3.5721476580417044e-10	NC_044374.1	68970201	68973799	+	61.0981	3598	Intergenic	Intergenic	-6846	LOC115718180	LOC115718180	XM_030647143	F-box protein At2g26160	protein_coding	-0.194551605	1	1	-1.555850214	0.120386368	0.678447133
1.700917564743644e-08-2	NC_044375.1	14107801	14111599	+	61.0921	3798	Intergenic	Intergenic	-37768	LOC115719665	LOC115719665	XM_030648787	leucine-rich repeat protein 1	protein_coding	0.176662566	1	1	0.153028127	1	1
1.700917564743644e-08	NC_044371.1	56710801	56714199	+	61.0921	3398	Intergenic	Intergenic	-65990	LOC115705109	LOC115705109	XM_030632350	#N/A	protein_coding	0	1	NA	-0.925217262	1	NA
1.1849528116414457e-07	NC_044371.1	70943601	70946599	+	61.0877	2998	Intergenic	Intergenic	-2079	LOC115708168	LOC115708168	XM_030636379	cyclic dof factor 1,	protein_coding	0.870435795	1	1	0.232966887	1	1
8.327582750505946e-07-2	NC_044375.1	58556401	58557999	+	61.0819	1598	Intergenic	Intergenic	-20097	LOC115720224	LOC115720224	XM_030649381	uncharacterized LOC115720224	protein_coding	NA	NA	NA	NA	NA	NA
8.327582750505946e-07	NC_044374.1	61952601	61954199	+	61.0819	1598	Intergenic	Intergenic	-73582	LOC115717886	LOC115717886	XM_030646856	uncharacterized mitochondrial protein AtMg00310-like	protein_coding	0	1	NA	-1.742002822	0.854499492	NA
5.921115615938134e-06	NW_022060487.1	117201	118799	+	61.0738	1598	NA	NA	NA	NA			#N/A		NA	NA	NA	NA	NA	NA
4.279462112257238e-05	NC_044372.1	55581001	55581999	+	61.0615	998	Intergenic	Intergenic	70146	LOC115710780	LOC115710780	XM_030639130	uncharacterized LOC115710780	protein_coding	NA	NA	NA	NA	NA	NA
1.8706425516302427e-08	NC_044374.1	77194001	77196599	+	61.0615	2598	Intergenic	Intergenic	354742	LOC115718006	LOC115718006	XM_030646974	uncharacterized LOC115718006	protein_coding	0.410947537	1	NA	0.998328082	1	NA
9.166976216149976e-07	NC_044374.1	26777401	26780199	+	61.041	2798	Intergenic	Intergenic	-23201	LOC115717677	LOC115717677	XM_030646658	uncharacterized LOC115717677	protein_coding	NA	NA	NA	NA	NA	NA
6.5225936432782265e-06-3	NC_044379.1	41058401	41059799	+	61.0245	1398	Intergenic	Intergenic	12522	LOC115700560	LOC115700560	XM_030628129	uncharacterized LOC115700560	protein_coding	0.009782088	1	1	0.220443004	1	1
6.5225936432782265e-06-2	NC_044375.1	47184001	47185399	+	61.0245	1398	Intergenic	Intergenic	-5762	LOC115720141	LOC115720141	XM_030649300	uncharacterized LOC115720141	protein_coding	NA	NA	NA	NA	NA	NA
6.5225936432782265e-06	NC_044370.1	36297201	36298599	+	61.0245	1398	intron	-intron (LOC115710480, intron 6 of 6)	-14195	LOC115710473	LOC115710473	XM_030638836	putative indole-3-acetic acid-amido synthetase GH3.9	protein_coding	-2.685481662	0.092556932	0.496989361	-4.989704562	4.41E-05	0.000627297
1.1133034136321893e-11	NC_044373.1	42829601	42833199	+	61.0204	3598	intron	-intron (LOC115713437, intron 2 of 2)	792	LOC115713437	LOC115713437	XM_030641920	stress response protein NST1-like	protein_coding	0.333047658	1	NA	0.920448172	1	NA
0.0024476854307486375	NC_044371.1	8806001	8806599	+	60.9996	598	Intergenic	Intergenic	-38952	LOC115706491	LOC115706491	XM_030634153	cucumisin	protein_coding	0.073014213	1	1	5.739516086	6.10E-18	3.46E-16
0.0024476854307486375-2	NC_044376.1	21762801	21763399	+	60.9996	598	Intergenic	Intergenic	-7615	LOC115723662	LOC115723662	XM_030653144	uncharacterized LOC115723662	protein_coding	NA	NA	NA	NA	NA	NA
4.719056226729109e-05	NC_044377.1	12886001	12887199	+	60.9996	1198	Intergenic	Intergenic	14108	LOC115724585	LOC115724585	XM_030653901	EIN3-binding F-box protein 1	protein_coding	-0.251882388	1	1	-0.609979247	1	1
4.719056226729109e-05-2	NC_044377.1	41630001	41630999	+	60.9996	998	intron	-intron (LOC115695192, intron 1 of 2)	36472	LOC115695192	LOC115695192	XM_030622281	uncharacterized LOC115695192	protein_coding	-0.805043555	1	1	-0.99954429	1	1
0.00035014220808238835-2	NC_044376.1	31491601	31492999	+	60.9575	1398	Intergenic	Intergenic	-19434	LOC115723325	LOC115723325	XR_004012947	uncharacterized LOC115723325	lncRNA	3.141801814	0.315379161	1	4.690988965	0.08359249	0.500840912
0.00035014220808238835	NC_044370.1	77338001	77338999	+	60.9575	998	Intergenic	Intergenic	96761	LOC115717510	LOC115717510	XM_030646499	ubiquitin carboxyl-terminal hydrolase 16,	protein_coding	-0.023091317	1	1	-0.033581914	1	1
1.736431480547932e-07-2	NC_044373.1	56976201	56978399	+	60.9454	2198	Intergenic	Intergenic	64004	LOC115713014	LOC115713014	XR_004010974	uncharacterized LOC115713014	lncRNA	-1.512629836	0.90002605	NA	0	1	NA
1.736431480547932e-07	NC_044370.1	58807801	58810399	+	60.9454	2598	Intergenic	Intergenic	31680	LOC115712996	LOC115712996	XM_030641465	#N/A	protein_coding	2.321734955	0.002546231	0.025666596	2.35274184	0.002010539	0.020534057
5.204052377438004e-05-2	NC_044378.1	47587201	47588999	+	60.9362	1798	Intergenic	Intergenic	-122477	LOC115696613	LOC115696613	XM_030623507	uncharacterized LOC115696613	protein_coding	NA	NA	NA	NA	NA	NA
5.204052377438004e-05	NC_044371.1	14805201	14805999	+	60.9362	798	Intergenic	Intergenic	34018	LOC115705126	LOC115705126	XM_030632367	60S acidic ribosomal protein P0	protein_coding	-0.599552262	1	1	-0.736318805	1	1
1.1131927451894015e-14	NC_044373.1	43034601	43039599	+	60.9202	4998	Intergenic	Intergenic	206492	LOC115713437	LOC115713437	XM_030641920	stress response protein NST1-like	protein_coding	0.333047658	1	NA	0.920448172	1	NA
1.2229187688476024e-06	NC_044375.1	52116601	52118199	+	60.9148	1598	Intergenic	Intergenic	68976	LOC115721573	LOC115721573	XR_004012588	small nucleolar RNA R71	snoRNA	NA	NA	NA	NA	NA	NA
1.2229187688476024e-06-2	NC_044376.1	26587801	26589399	+	60.9148	1598	exon	-exon (LOC115723717, exon 1 of 3)	257	LOC115723717	LOC115723717	XM_030653194	uncharacterized LOC115723717	protein_coding	0.410947537	1	NA	0.036563417	1	NA
1.910562535636254e-07	NC_044373.1	85633001	85635199	+	60.9087	2198	Intergenic	Intergenic	-2812	LOC115712501	LOC115712501	XR_004010879	uncharacterized LOC115712501,	lncRNA	-1.010534338	0.993796351	1	-0.218667089	1	1
8.720615589299351e-06	NC_044370.1	67096601	67099199	+	60.8716	2598	Intergenic	Intergenic	-8273	LOC115713556	LOC115713556	XM_030642046	protein NPGR1,	protein_coding	1.10651835	0.717859013	1	-0.834446534	1	1
1.3462895626022412e-06	NC_044374.1	60142601	60144399	+	60.8716	1798	Intergenic	Intergenic	-312655	LOC115717877	LOC115717877	XM_030646848	uncharacterized LOC115717877	protein_coding	NA	NA	NA	NA	NA	NA
0.002711705521600211-3	NC_044379.1	36777001	36777599	+	60.8716	598	Intergenic	Intergenic	135551	LOC115698693	LOC115698693	XM_030625834	uncharacterized LOC115698693	protein_coding	-0.224023462	1	1	0.180708744	1	1
5.739170313311946e-05-2	NC_044377.1	44236201	44238199	+	60.8716	1998	Intergenic	Intergenic	32180	LOC115724943	LOC115724943	XM_030654320	ubiquitin thioesterase OTU1,	protein_coding	-0.496454632	1	1	-0.204237474	1	1
5.739170313311946e-05	NC_044370.1	35533001	35534199	+	60.8716	1198	Intergenic	Intergenic	145377	LOC115710400	LOC115710400	XM_030638766	G-type lectin S-receptor-like serine/threonine-protein kinase LECRK1	protein_coding	0	1	NA	-1.694662035	0.863807158	NA
0.002711705521600211-2	NC_044377.1	34174801	34175399	+	60.8716	598	Intergenic	Intergenic	-7780	LOC115695110	LOC115695110	XM_030622200	uncharacterized LOC115695110	protein_coding	NA	NA	NA	NA	NA	NA
5.739170313311946e-05-3	NC_044377.1	69581801	69583399	+	60.8716	1598	Intergenic	Intergenic	-4492	LOC115695427	LOC115695427	XM_030622492	uncharacterized LOC115695427	protein_coding	NA	NA	NA	NA	NA	NA
0.00038677624071903766	NC_044373.1	66637401	66638399	+	60.8716	998	Intergenic	Intergenic	-12421	TRNAR-UCU_3	TRNAR-UCU_3	TRNAR-UCU_3	#N/A	tRNA	NA	NA	NA	NA	NA	NA
1.3462895626022412e-06-2	NC_044375.1	14262401	14264199	+	60.8716	1798	Intergenic	Intergenic	-50906	LOC115719877	LOC115719877	XM_030649056	NADH dehydrogenase [ubiquinone] 1 alpha subcomplex subunit 8-B-like	protein_coding	-0.000532555	1	1	-0.179533091	1	1
0.002711705521600211	NC_044372.1	40753001	40753599	+	60.8716	598	Intergenic	Intergenic	-8380	LOC115710685	LOC115710685	XM_030639036	uncharacterized LOC115710685	protein_coding	NA	NA	NA	NA	NA	NA
2.3130564534547933e-07	NC_044379.1	60323801	60326199	+	60.834	2398	Intergenic	Intergenic	-7077	LOC115699520	LOC115699520	XM_030626979	DNA repair protein UVH3,	protein_coding	0.170242305	1	1	0.507045379	1	1
1.4821359498033839e-06	NC_044377.1	13415801	13418999	+	60.8277	3198	Intergenic	Intergenic	30703	LOC115725744	LOC115725744	XM_030655341	ABC transporter A family member 1-like	protein_coding	NA	NA	NA	NA	NA	NA
1.4821359498033839e-06-2	NW_022060454.1	492001	493799	+	60.8277	1798	Intergenic	Intergenic	-11258	LOC115702127	LOC115702127	XM_030629586	#N/A	protein_coding	-1.078418672	0.906335909	1	0.136444746	1	1
9.607614485636658e-06	NC_044371.1	33292401	33293999	+	60.8189	1598	TTS	-TTS (LOC115708546)	419	LOC115708546	LOC115708546	XR_004010037	small nucleolar RNA R71	snoRNA	NA	NA	NA	NA	NA	NA
9.607614485636658e-06-2	NC_044378.1	52879001	52880199	+	60.8189	1198	Intergenic	Intergenic	26997	LOC115697318	LOC115697318	XM_030624265	ethylene-responsive transcription factor 4	protein_coding	2.28128686	2.10E-07	5.72E-06	0.779576669	1	1
0.0004272807207926435-6	NC_044379.1	13887801	13888599	+	60.7832	798	Intergenic	Intergenic	-35994	LOC115699161	LOC115699161	XM_030626423	BEL1-like homeodomain protein 1,	protein_coding	-0.35759807	1	1	-0.526626241	1	1
0.0004272807207926435-3	NC_044372.1	69684601	69685599	+	60.7832	998	Intergenic	Intergenic	459006	LOC115709988	LOC115709988	XM_030638275	protein REVEILLE 8,	protein_coding	-1.028155173	0.900116137	1	0.272255282	1	1
0.0004272807207926435	NC_044370.1	74509001	74509799	+	60.7832	798	Intergenic	Intergenic	-9908	LOC115714431	LOC115714431	XM_030643149	cytochrome P450 81Q32,	protein_coding	1.715017736	0.62759098	1	5.145005009	0.017327673	0.133877066
0.0004272807207926435-5	NC_044375.1	46360801	46361599	+	60.7832	798	Intergenic	Intergenic	-17377	LOC115720131	LOC115720131	XM_030649291	uncharacterized LOC115720131	protein_coding	NA	NA	NA	NA	NA	NA
0.0004272807207926435-2	NC_044370.1	104000801	104001599	+	60.7832	798	Intergenic	Intergenic	-11810	LOC115702086	LOC115702086	XM_030629532	zinc finger CCCH domain-containing protein 15,	protein_coding	0.026174451	1	1	0.33177898	1	1
0.0004272807207926435-4	NC_044372.1	73103201	73103999	+	60.7832	798	Intergenic	Intergenic	-15133	LOC115710912	LOC115710912	XM_030639264	uncharacterized LOC115710912	protein_coding	1.183474883	0.963862251	NA	1.770848997	0.849029162	NA
1.999601825569998e-17	NC_044374.1	38951401	38956399	+	60.7787	4998	intron	-intron (LOC115715830, intron 6 of 10)	2425	LOC115715830	LOC115715830	XM_030644497	uncharacterized LOC115715830	protein_coding	-1.081122848	0.844352883	1	0.038299871	1	1
1.0585159620560077e-05	NC_044378.1	61459601	61461399	+	60.7652	1798	Intergenic	Intergenic	12182	LOC115697986	LOC115697986	XM_030625163	putative germin-like protein 2-1	protein_coding	NA	NA	NA	NA	NA	NA
6.981175347668264e-05-2	NC_044379.1	45383001	45383999	+	60.7381	998	Intergenic	Intergenic	-35481	LOC115698951	LOC115698951	XM_030626160	protein no-on-transient A	protein_coding	-0.237901854	1	1	0.147487465	1	1
4.8449750517842294e-08	NC_044370.1	60168201	60170399	+	60.7381	2198	Intergenic	Intergenic	7441	LOC115722799	LOC115722799	XM_030652128	NADH-ubiquinone oxidoreductase chain 3	protein_coding	NA	NA	NA	NA	NA	NA
6.981175347668264e-05	NC_044377.1	50536801	50537799	+	60.7381	998	Intergenic	Intergenic	55228	LOC115696075	LOC115696075	XR_004007673	small nucleolar RNA R71	snoRNA	NA	NA	NA	NA	NA	NA
0.00047206960479728407	NC_044379.1	20650201	20650999	+	60.6923	798	Intergenic	Intergenic	35195	LOC115701663	LOC115701663	XR_004008653	small nucleolar RNA R71	snoRNA	NA	NA	NA	NA	NA	NA
0.00047206960479728407-2	NW_022060476.1	226601	227199	+	60.6923	598	Intergenic	Intergenic	-504900	LOC115702188	LOC115702188	XM_030629636	#N/A	protein_coding	NA	NA	NA	NA	NA	NA
1.9778347323887006e-06	NC_044378.1	35922001	35923599	+	60.6923	1598	Intergenic	Intergenic	25710	LOC115697789	LOC115697789	XM_030624912	protein LURP-one-related 8	protein_coding	-0.593365918	1	1	-2.171808473	0.479538524	1
7.700189278537975e-05	NC_044373.1	40263401	40264399	+	60.6691	998	Intergenic	Intergenic	-3894	LOC115712709	LOC115712709	XM_030641045	translocator protein homolog	protein_coding	1.002663859	0.99436213	1	1.199843631	0.587665151	1
3.7312569333468797e-07	NC_044374.1	22768001	22770399	+	60.6391	2398	Intergenic	Intergenic	-54613	LOC115716848	LOC115716848	XM_030645754	BAG family molecular chaperone regulator 1,	protein_coding	-1.238669214	0.293230093	1	1.046236547	0.840525273	1
6.447105966666121e-08	NC_044371.1	54910201	54912399	+	60.6341	2198	promoter-TSS	-promoter-TSS (LOC115704145)	-173	LOC115704145	LOC115704145	XM_030631362	uncharacterized LOC115704145	protein_coding	NA	NA	NA	NA	NA	NA
6.447105966666121e-08-2	NW_022060454.1	409801	412199	+	60.6341	2398	Intergenic	Intergenic	-93158	LOC115702127	LOC115702127	XM_030629586	#N/A	protein_coding	-1.078418672	0.906335909	1	0.136444746	1	1
1.1212801074911856e-08	NC_044370.1	83827201	83829399	+	60.6301	2198	Intergenic	Intergenic	25982	LOC115703450	LOC115703450	XR_004009213	small nucleolar RNA R71	snoRNA	NA	NA	NA	NA	NA	NA
1.4158772253075065e-05	NC_044373.1	51918201	51919599	+	60.5986	1398	Intergenic	Intergenic	-35843	LOC115712298	LOC115712298	XM_030640558	transcription factor bHLH130,	protein_coding	-0.488554175	1	1	-0.10637666	1	1
8.493700680082862e-05	NC_044373.1	21397601	21398799	+	60.5986	1198	Intergenic	Intergenic	-14597	LOC115713235	LOC115713235	XM_030641719	uncharacterized LOC115713235	protein_coding	NA	NA	NA	NA	NA	NA
8.493700680082862e-05-2	NW_022060417.1	285401	286599	+	60.5986	1198	Intergenic	Intergenic	202764	LOC115702063	LOC115702063	XM_030629513	#N/A	protein_coding	NA	NA	NA	NA	NA	NA
0.000521601818773028	NC_044371.1	9236801	9237599	+	60.5986	798	Intergenic	Intergenic	-14208	LOC115704844	LOC115704844	XM_030632055	putative acyl-activating enzyme 19	protein_coding	0.440727085	1	1	0.069470344	1	1
7.091390789009343e-08	NC_044372.1	33261001	33263599	+	60.5986	2598	promoter-TSS	-promoter-TSS (LOC115710632)	-305	LOC115710632	LOC115710632	XM_030638989	uncharacterized LOC115710632	protein_coding	NA	NA	NA	NA	NA	NA
2.3975637950494716e-06	NC_044370.1	91318201	91320799	+	60.5986	2598	Intergenic	Intergenic	9173	LOC115703278	LOC115703278	XR_004009055	small nucleolar RNA R71	snoRNA	NA	NA	NA	NA	NA	NA
0.000521601818773028-3	NC_044376.1	22037001	22037999	+	60.5986	998	Intergenic	Intergenic	-36532	LOC115724255	LOC115724255	XR_004013055	small nucleolar RNA R71	snoRNA	NA	NA	NA	NA	NA	NA
0.000521601818773028-2	NC_044375.1	80349401	80350399	+	60.5986	998	Intergenic	Intergenic	113555	LOC115718547	LOC115718547	XM_030647347	telomere repeat-binding protein 5,	protein_coding	0.040080582	1	1	0.22062724	1	1
2.1549934141162947e-09	NC_044372.1	1698801	1701399	+	60.5986	2598	Intergenic	Intergenic	-7205	LOC115708894	LOC115708894	XM_030636917	protein DETOXIFICATION 43,	protein_coding	-3.019534247	0.220249509	0.963334769	-9.931514219	3.39E-08	7.60E-07
1.7558300379411312e-23	NC_044372.1	55716401	55722999	+	60.569	6598	Intergenic	Intergenic	2007	TRNAM-CAU_5	TRNAM-CAU_5	TRNAM-CAU_5	#N/A	tRNA	NA	NA	NA	NA	NA	NA
1.3556760611620384e-08	NC_044376.1	52000201	52003799	+	60.5668	3598	Intergenic	Intergenic	10620	LOC115724351	LOC115724351	XR_004013147	small nucleolar RNA snoR109	snoRNA	NA	NA	NA	NA	NA	NA
1.5601389694434062e-05-2	NC_044378.1	38267001	38268399	+	60.5411	1398	Intergenic	Intergenic	-11071	LOC115697270	LOC115697270	XM_030624203	putative E3 ubiquitin-protein ligase XBAT31	protein_coding	0.626363082	1	1	-0.75579907	1	1
1.5601389694434062e-05	NC_044376.1	61077201	61078599	+	60.5411	1398	TTS	-TTS (LOC115724037)	1207	LOC115724037	LOC115724037	XM_030653491	uncharacterized LOC115724037	protein_coding	NA	NA	NA	NA	NA	NA
9.36948398152459e-05	NW_022060454.1	1241801	1242799	+	60.5265	998	Intergenic	Intergenic	-259892	LOC115702125	LOC115702125	XM_030629583	#N/A	protein_coding	2.642988593	0.003486277	0.033308503	3.285318001	4.97E-05	0.000699547
8.579819514146405e-08-2	NC_044377.1	32829801	32830999	+	60.5265	1198	Intergenic	Intergenic	-206924	LOC115695107	LOC115695107	XM_030622197	uncharacterized LOC115695107	protein_coding	NA	NA	NA	NA	NA	NA
8.579819514146405e-08	NC_044373.1	81226401	81228999	+	60.5265	2598	promoter-TSS	-promoter-TSS (LOC115715417)	-793	LOC115715417	LOC115715417	XR_004011288	small nucleolar RNA R71	snoRNA	NA	NA	NA	NA	NA	NA
2.8625879212087863e-09	NC_044372.1	54438401	54441599	+	60.5119	3198	Intergenic	Intergenic	-27934	LOC115711217	LOC115711217	XM_030639544	uncharacterized LOC115711217	protein_coding	1.38150273	0.874189228	1	-1.624213196	0.77052972	1
0.0005763862427667905-2	NC_044375.1	163801	164599	+	60.5021	798	Intergenic	Intergenic	14031	LOC115719068	LOC115719068	XM_030647970	uncharacterized LOC115719068	protein_coding	2.350392131	0.73381124	NA	2.93775653	0.625563812	NA
0.0005763862427667905	NC_044372.1	63638401	63639199	+	60.5021	798	Intergenic	Intergenic	-39501	LOC115711668	LOC115711668	XM_030640042	T-complex protein 1 subunit delta	protein_coding	-0.39984035	1	1	-0.625412261	1	1
2.906617466733067e-06	NC_044372.1	61560801	61562399	+	60.5021	1598	Intergenic	Intergenic	-2666	LOC115711782	LOC115711782	XR_004010657	small nucleolar RNA R71	snoRNA	NA	NA	NA	NA	NA	NA
1.719156862609863e-05-3	NC_044378.1	59485401	59486799	+	60.4825	1398	Intergenic	Intergenic	-15576	LOC115698213	LOC115698213	XR_004008073	uncharacterized LOC115698213,	lncRNA	0.506889175	1	1	0.01417182	1	1
1.719156862609863e-05-2	NC_044377.1	5509001	5510399	+	60.4825	1398	Intergenic	Intergenic	-9046	LOC115724599	LOC115724599	XM_030653915	WAT1-related protein At4g30420	protein_coding	2.063972425	0.15975081	0.760497726	1.028585437	0.968892961	1
1.719156862609863e-05	NC_044375.1	93494401	93495799	+	60.4825	1398	Intergenic	Intergenic	25581	LOC115721270	LOC115721270	XM_030650534	helicase protein MOM1,	protein_coding	0.167075044	1	1	0.1443083	1	1
5.471470662166622e-07	NC_044370.1	54624601	54626399	+	60.474	1798	Intergenic	Intergenic	-13195	LOC115721768	LOC115721768	XM_030650847	uncharacterized LOC115721768	protein_coding	NA	NA	NA	NA	NA	NA
3.200450512296518e-06	NC_044374.1	58710401	58713199	+	60.4528	2798	Intergenic	Intergenic	51275	LOC115715829	LOC115715829	XR_004011449	uncharacterized LOC115715829,	lncRNA	0.500272922	1	1	-0.93764179	1	1
0.00010336132066618832	NC_044372.1	73008801	73010399	+	60.4528	1598	Intergenic	Intergenic	24648	LOC115710911	LOC115710911	XM_030639262	uncharacterized LOC115710911	protein_coding	NA	NA	NA	NA	NA	NA
3.200450512296518e-06-2	NC_044379.1	45754601	45756999	+	60.4528	2398	Intergenic	Intergenic	119095	LOC115700161	LOC115700161	XM_030627721	uncharacterized LOC115700161	protein_coding	NA	NA	NA	NA	NA	NA
0.00010336132066618832-2	NC_044376.1	44492201	44493399	+	60.4528	1198	Intergenic	Intergenic	-48602	LOC115723852	LOC115723852	XM_030653317	uncharacterized LOC115723852	protein_coding	NA	NA	NA	NA	NA	NA
1.981884477608214e-08	NC_044370.1	65922601	65925199	+	60.4362	2598	Intergenic	Intergenic	20120	LOC115713417	LOC115713417	XM_030641900	uncharacterized LOC115713417	protein_coding	4.401365882	1.08E-16	9.39E-15	3.122637036	2.23E-09	5.72E-08
7.27438753904031e-18	NC_044377.1	24515601	24520799	+	60.4256	5198	Intergenic	Intergenic	351052	LOC115695060	LOC115695060	XM_030622157	uncharacterized LOC115695060	protein_coding	NA	NA	NA	NA	NA	NA
7.326644344559123e-10	NC_044372.1	25421201	25424199	+	60.4119	2998	Intergenic	Intergenic	19791	LOC115710568	LOC115710568	XM_030638928	uncharacterized LOC115710568	protein_coding	NA	NA	NA	NA	NA	NA
3.5240666340242676e-06-3	NC_044374.1	58516001	58517799	+	60.4027	1798	Intergenic	Intergenic	246175	LOC115715829	LOC115715829	XR_004011449	uncharacterized LOC115715829,	lncRNA	0.500272922	1	1	-0.93764179	1	1
3.5240666340242676e-06-2	NC_044373.1	76806601	76808599	+	60.4027	1998	Intergenic	Intergenic	41719	LOC115713693	LOC115713693	XM_030642175	uncharacterized LOC115713693	protein_coding	NA	NA	NA	NA	NA	NA
3.5240666340242676e-06-4	NC_044375.1	64011001	64013199	+	60.4027	2198	Intergenic	Intergenic	9349	LOC115720253	LOC115720253	XM_030649409	uncharacterized mitochondrial protein AtMg00310-like	protein_coding	NA	NA	NA	NA	NA	NA
3.5240666340242676e-06	NC_044373.1	8970001	8971399	+	60.4027	1398	Intergenic	Intergenic	13792	LOC115712135	LOC115712135	XM_030640378	calmodulin-7	protein_coding	0.828619184	1	1	-0.409051784	1	1
6.626252042101585e-07	NC_044379.1	5861001	5862999	+	60.3883	1998	Intergenic	Intergenic	31934	LOC115701102	LOC115701102	XM_030628797	homeobox-leucine zipper protein ATHB-54-like	protein_coding	1.988125155	0.091140449	0.4918565	2.807728882	0.002802251	0.027313252
0.00011403143368913355-3	NC_044379.1	16615801	16616999	+	60.3774	1198	Intergenic	Intergenic	-8566	LOC115699888	LOC115699888	XM_030627430	dnaJ homolog subfamily B member 14-like	protein_coding	-1.512629836	0.90002605	NA	-0.925225269	1	NA
0.00011403143368913355-2	NC_044377.1	40402201	40403999	+	60.3774	1798	Intergenic	Intergenic	-43684	LOC115695183	LOC115695183	XM_030622275	uncharacterized LOC115695183	protein_coding	NA	NA	NA	NA	NA	NA
0.00011403143368913355	NC_044373.1	65629601	65630599	+	60.3774	998	Intergenic	Intergenic	16697	LOC115713579	LOC115713579	XM_030642067	uncharacterized LOC115713579	protein_coding	NA	NA	NA	NA	NA	NA
2.0876827541414983e-05-2	NC_044374.1	54444201	54445599	+	60.3621	1398	Intergenic	Intergenic	36877	LOC115717852	LOC115717852	XM_030646822	uncharacterized LOC115717852	protein_coding	NA	NA	NA	NA	NA	NA
2.0876827541414983e-05	NC_044374.1	20851801	20853199	+	60.3621	1398	Intergenic	Intergenic	-3392	LOC115718335	LOC115718335	XR_004011914	small nucleolar RNA R71	snoRNA	NA	NA	NA	NA	NA	NA
3.8804938110987836e-06	NC_044373.1	70531601	70534599	+	60.3519	2998	TTS	-TTS (LOC115713635)	1568	LOC115713635	LOC115713635	XM_030642121	uncharacterized LOC115713635	protein_coding	NA	NA	NA	NA	NA	NA
7.292223843251937e-07	NC_044377.1	17228001	17229799	+	60.3445	1798	Intergenic	Intergenic	32863	LOC115695019	LOC115695019	XM_030622117	beta-1,2-xylosyltransferase XYXT1-like	protein_coding	NA	NA	NA	NA	NA	NA
5.051817881090468e-09	NC_044376.1	53393601	53396199	+	60.3313	2598	Intergenic	Intergenic	-481813	LOC115724262	LOC115724262	XR_004013061	small nucleolar RNA R71	snoRNA	NA	NA	NA	NA	NA	NA
3.642483419963956e-11	NW_022060329.1	159001	162599	+	60.3242	3598	Intergenic	Intergenic	-23708	LOC115701979	LOC115701979	XR_004008776	#N/A	lncRNA	NA	NA	NA	NA	NA	NA
1.533357369067089e-17	NC_044378.1	14215401	14221599	+	60.3144	6198	Intergenic	Intergenic	-78077	LOC115696363	LOC115696363	XM_030623264	uncharacterized LOC115696363	protein_coding	NA	NA	NA	NA	NA	NA
2.8977016225977538e-08	NC_044375.1	73614001	73617599	+	60.3002	3598	Intergenic	Intergenic	-6486	LOC115719439	LOC115719439	XM_030648491	probable protein phosphatase 2C 24	protein_coding	1.676783573	0.011260369	0.088931011	2.18092808	9.71E-06	0.000152599
0.00012581018360073264-4	NW_022060507.1	440401	441599	+	60.3002	1198	Intergenic	Intergenic	17058	LOC115702256	LOC115702256	XM_030629707	#N/A	protein_coding	0.333045492	1	NA	-0.483227919	1	NA
0.00012581018360073264	NC_044373.1	26166401	26167399	+	60.3002	998	Intergenic	Intergenic	-13268	LOC115715308	LOC115715308	XM_030644161	zinc-finger homeodomain protein 4	protein_coding	-0.84006067	1	1	2.56474183	0.000379053	0.004533865
2.9545508576895486e-13	NC_044372.1	80604401	80608399	+	60.3002	3998	exon	-exon (LOC115710994, exon 1 of 2)	866	LOC115710994	LOC115710994	XM_030639340	uncharacterized LOC115710994	protein_coding	0.410947537	1	NA	0.998328082	1	NA
0.0007040309547504799-2	NC_044378.1	26053001	26053799	+	60.3002	798	Intergenic	Intergenic	7881	LOC115697886	LOC115697886	XR_004007997	inactive tetrahydrocannabinolic acid synthase-like	transcribed_pseudogene	7.587114174	3.10E-06	6.76E-05	8.174514626	3.77E-07	7.38E-06
0.0007040309547504799	NC_044375.1	44965601	44966399	+	60.3002	798	Intergenic	Intergenic	-139626	LOC115721173	LOC115721173	XM_030650426	NADPH-dependent aldehyde reductase 1, chloroplastic-like	protein_coding	7.206904317	0.000258441	0.003625484	7.794300258	6.35E-05	0.000870983
0.00012581018360073264-2	NC_044375.1	11590801	11591599	+	60.3002	798	Intergenic	Intergenic	-14858	LOC115721285	LOC115721285	XM_030650553	probable LRR receptor-like serine/threonine-protein kinase At5g45780	protein_coding	0.075675123	1	1	0.207197625	1	1
0.00012581018360073264-3	NC_044379.1	46168601	46169399	+	60.3002	798	intron	-intron (LOC115700166, intron 3 of 3)	-11193	LOC115700165	LOC115700165	XM_030627727	putative leucine-rich repeat receptor-like protein kinase At2g19210	protein_coding	2.645251165	0.677741939	NA	3.23261311	0.572816935	NA
4.273068938055769e-06	NC_044370.1	94204401	94205999	+	60.3002	1598	Intergenic	Intergenic	53667	LOC115698132	LOC115698132	XM_030625311	probable trehalose-phosphate phosphatase D	protein_coding	-0.657784847	1	1	-1.581236468	0.292576855	1
2.3007094598742026e-05	NC_044372.1	25957001	25958399	+	60.3002	1398	Intergenic	Intergenic	-42601	LOC115709117	LOC115709117	XR_004010171	uncharacterized LOC115709117,	lncRNA	NA	NA	NA	NA	NA	NA
3.1864414077389813e-08	NC_044374.1	20151601	20153799	+	60.2654	2198	Intergenic	Intergenic	-20997	LOC115716964	LOC115716964	XR_004011638	uncharacterized LOC115716964,	lncRNA	6.658176752	2.14E-05	0.000392253	2.644459071	0.015959846	0.124731941
1.672005682774271e-07	NC_044377.1	44010001	44011999	+	60.261	1998	Intergenic	Intergenic	-93032	LOC115695668	LOC115695668	XM_030622727	uncharacterized protein At1g66480	protein_coding	-0.071708717	1	1	-3.239340754	1.77E-07	3.64E-06
8.832113536551179e-07	NC_044379.1	48335201	48336799	+	60.2553	1598	Intergenic	Intergenic	14282	LOC115699541	LOC115699541	XM_030627008	DEAD-box ATP-dependent RNA helicase 14	protein_coding	0.607953789	1	1	0.106051127	1	1
2.5355640042837686e-05	NC_044374.1	66685001	66686199	+	60.2372	1198	intron	-intron (LOC115717377, intron 3 of 3)	18397	LOC115717377	LOC115717377	XM_030646349	cadmium-induced protein AS8,	protein_coding	-1.256518228	0.175494167	0.814860959	0.485940934	1	1
0.00013881366461464264	NC_044372.1	20091001	20092399	+	60.2212	1398	Intergenic	Intergenic	11628	LOC115709936	LOC115709936	XM_030638201	probable methyltransferase PMT2	protein_coding	0.275221034	1	1	0.035453822	1	1
0.00013881366461464264-2	NC_044376.1	46179601	46180599	+	60.2212	998	Intergenic	Intergenic	-24754	LOC115724325	LOC115724325	XR_004013122	small nucleolar RNA R71	snoRNA	NA	NA	NA	NA	NA	NA
9.720249334051696e-07-2	NC_044377.1	56691401	56692599	+	60.2098	1198	Intergenic	Intergenic	-94773	LOC115695290	LOC115695290	XM_030622364	L10-interacting MYB domain-containing protein-like	protein_coding	NA	NA	NA	NA	NA	NA
9.720249334051696e-07	NC_044373.1	45992401	45993999	+	60.2098	1598	Intergenic	Intergenic	7315	LOC115712342	LOC115712342	XM_030640616	uncharacterized LOC115712342	protein_coding	-0.402860911	1	1	-2.334719336	0.032253958	0.227620457
0.0007782119823320553	NC_044376.1	8200001	8200799	+	60.1945	798	intron	-intron (LOC115724056, intron 1 of 4)	5563	LOC115724055	LOC115724055	XM_030653508	lecithin retinol acyltransferase,	protein_coding	2.10518137	0.12968017	0.647005595	3.544895637	0.002083534	0.021169484
0.0007782119823320553-2	NC_044379.1	1695201	1695999	+	60.1945	798	Intergenic	Intergenic	-1094189	LOC115698919	LOC115698919	XM_030626122	extracellular ribonuclease LE	protein_coding	6.151631711	1.47E-17	1.49E-15	3.483828726	2.08E-15	9.58E-14
3.0107929353056066e-10	NC_044374.1	21394001	21397199	+	60.1945	3198	Intergenic	Intergenic	-19640	LOC115716653	LOC115716653	XM_030645499	mitogen-activated protein kinase 4-like	protein_coding	-1.83479824	0.127194269	0.637896015	-0.039593117	1	1
3.853193132005539e-08	NC_044372.1	27621401	27623999	+	60.1945	2598	Intergenic	Intergenic	-4994	LOC115711865	LOC115711865	XR_004010732	small nucleolar RNA R71	snoRNA	NA	NA	NA	NA	NA	NA
8.111245640283146e-09	NC_044377.1	43635601	43638199	+	60.173	2598	Intergenic	Intergenic	-467132	LOC115695668	LOC115695668	XM_030622727	uncharacterized protein At1g66480	protein_coding	-0.071708717	1	1	-3.239340754	1.77E-07	3.64E-06
5.7063722922350084e-06-2	NC_044377.1	63966601	63969199	+	60.1404	2598	Intergenic	Intergenic	-20637	LOC115696073	LOC115696073	XR_004007671	small nucleolar RNA R71	snoRNA	NA	NA	NA	NA	NA	NA
5.7063722922350084e-06	NC_044377.1	19677801	19679799	+	60.1404	1998	Intergenic	Intergenic	70367	LOC115695031	LOC115695031	XM_030622129	uncharacterized LOC115695031	protein_coding	NA	NA	NA	NA	NA	NA
0.0001531702452461143-7	NC_044376.1	15574801	15575999	+	60.1404	1198	Intergenic	Intergenic	-5928	LOC115722732	LOC115722732	XM_030652020	mitochondrial import receptor subunit TOM40-1,	protein_coding	-0.2654184	1	1	-0.804449867	1	1
0.0001531702452461143-3	NC_044371.1	12144201	12145999	+	60.1404	1798	promoter-TSS	-promoter-TSS (LOC115703948)	43	LOC115703948	LOC115703948	XR_004009264	uncharacterized LOC115703948	lncRNA	NA	NA	NA	NA	NA	NA
0.0001531702452461143-6	NC_044374.1	23488601	23489599	+	60.1404	998	Intergenic	Intergenic	29329	LOC115717364	LOC115717364	XM_030646332	dehydration-responsive element-binding protein 1E-like	protein_coding	1.003854048	0.994824526	1	2.631081514	0.009905093	0.082465459
0.0001531702452461143-8	NC_044377.1	24625401	24626399	+	60.1404	998	Intergenic	Intergenic	243352	LOC115695060	LOC115695060	XM_030622157	uncharacterized LOC115695060	protein_coding	NA	NA	NA	NA	NA	NA
0.0001531702452461143-2	NC_044371.1	9234401	9235399	+	60.1404	998	Intergenic	Intergenic	-16508	LOC115704844	LOC115704844	XM_030632055	putative acyl-activating enzyme 19	protein_coding	0.440727085	1	1	0.069470344	1	1
0.0001531702452461143-5	NC_044372.1	51822001	51823199	+	60.1404	1198	Intergenic	Intergenic	-15780	LOC115708754	LOC115708754	XM_030636761	reticulon-like protein B9	protein_coding	4.367476083	0.000177226	0.002592707	1.019669081	0.972319954	1
0.0001531702452461143	NC_044370.1	68702001	68703399	+	60.1404	1398	Intergenic	Intergenic	-22109	LOC115713724	LOC115713724	XM_030642207	strigolactone esterase D14	protein_coding	0.719400204	1	1	0.171071818	1	1
0.0001531702452461143-4	NC_044371.1	47570801	47571799	+	60.1404	998	Intergenic	Intergenic	-39221	LOC115706904	LOC115706904	XM_030634674	L-ascorbate peroxidase 2, cytosolic-like	protein_coding	NA	NA	NA	NA	NA	NA
1.8841700976856795e-09	NC_044379.1	45786201	45788999	+	60.1255	2798	Intergenic	Intergenic	87295	LOC115700161	LOC115700161	XM_030627721	uncharacterized LOC115700161	protein_coding	NA	NA	NA	NA	NA	NA
1.177400417514021e-06	NC_044378.1	48717001	48718599	+	60.1169	1598	Intergenic	Intergenic	98479	LOC115696618	LOC115696618	XM_030623512	uncharacterized LOC115696618	protein_coding	NA	NA	NA	NA	NA	NA
3.079979425402593e-05	NC_044371.1	54654401	54655599	+	60.1075	1198	Intergenic	Intergenic	-256473	LOC115704145	LOC115704145	XM_030631362	uncharacterized LOC115704145	protein_coding	NA	NA	NA	NA	NA	NA
7.539569273642891e-13	NC_044378.1	16439001	16444199	+	60.0992	5198	Intergenic	Intergenic	30004	LOC115698025	LOC115698025	XM_030625205	urease accessory protein D	protein_coding	-0.445405739	1	1	0.031737057	1	1
6.284264688735654e-06-2	NC_044374.1	77052201	77053599	+	60.0854	1398	Intergenic	Intergenic	497142	LOC115718006	LOC115718006	XM_030646974	uncharacterized LOC115718006	protein_coding	0.410947537	1	NA	0.998328082	1	NA
6.284264688735654e-06	NC_044372.1	14866801	14868399	+	60.0854	1598	Intergenic	Intergenic	21707	LOC115708844	LOC115708844	XM_030636863	ribosomal RNA small subunit methyltransferase G	protein_coding	0.030670719	1	1	0.340038188	1	1
0.000860301281561998	NC_044370.1	44385001	44385799	+	60.0854	798	Intergenic	Intergenic	43251	LOC115711182	LOC115711182	XM_030639513	cyclin-D3-3	protein_coding	1.299093184	0.47689422	1	-0.147377047	1	1
0.000860301281561998-2	NC_044375.1	13962401	13963199	+	60.0854	798	Intergenic	Intergenic	-6756	LOC115719872	LOC115719872	XM_030649053	uncharacterized LOC115719872	protein_coding	0.557584339	1	1	-0.855983356	1	1
0.000860301281561998-3	NC_044376.1	4780401	4780999	+	60.0854	598	Intergenic	Intergenic	-12249	LOC115721955	LOC115721955	XM_030651066	desiccation-related protein PCC13-62	protein_coding	3.808737946	0.361556793	NA	4.39611473	0.269931436	1
1.077707482138072e-08	NC_044374.1	73586601	73588599	+	60.0743	1998	exon	-exon (LOC115717984, exon 2 of 2)	1413	LOC115717984	LOC115717984	XM_030646954	uncharacterized LOC115717984	protein_coding	NA	NA	NA	NA	NA	NA
1.2958608265439293e-06	NC_044378.1	29039601	29041199	+	60.0695	1598	Intergenic	Intergenic	-26244	LOC115697254	LOC115697254	XM_030624185	threonylcarbamoyladenosine tRNA methylthiotransferase	protein_coding	-0.581828039	1	1	-0.495668476	1	1
5.634979097597146e-08	NC_044373.1	49205001	49207599	+	60.0482	2598	Intergenic	Intergenic	-28468	LOC115713489	LOC115713489	XM_030641973	succinate dehydrogenase [ubiquinone] iron-sulfur subunit 3, mitochondrial	protein_coding	1.294222407	0.941931806	NA	1.881595599	0.827223042	NA
3.394757858365223e-05	NC_044371.1	39000001	39001199	+	60.0408	1198	Intergenic	Intergenic	-32075	LOC115704231	LOC115704231	XM_030631447	protein DETOXIFICATION 51	protein_coding	0.096176802	1	1	-0.254961137	1	1
6.9208519687462e-06	NC_044378.1	17485201	17486599	+	60.0295	1398	Intergenic	Intergenic	42609	LOC115696390	LOC115696390	XM_030623291	uncharacterized LOC115696390	protein_coding	NA	NA	NA	NA	NA	NA
2.749503322209088e-09-2	NC_044379.1	63030801	63034199	+	60.0038	3398	promoter-TSS	-promoter-TSS (LOC115701792)	-7	LOC115701792	LOC115701792	XR_004008772	small nucleolar RNA R71	snoRNA	NA	NA	NA	NA	NA	NA
2.749503322209088e-09	NC_044377.1	22726001	22728599	+	60.0038	2598	Intergenic	Intergenic	72419	LOC115696096	LOC115696096	XR_004007694	small nucleolar RNA R71	snoRNA	NA	NA	NA	NA	NA	NA
2.7090293809823364e-23	NC_044373.1	48329601	48337799	+	59.9834	8198	Intergenic	Intergenic	-35184	TRNAQ-UUG_3	TRNAQ-UUG_3	TRNAQ-UUG_3	#N/A	tRNA	NA	NA	NA	NA	NA	NA
0.0009511546385034003	NC_044372.1	35264201	35264999	+	59.9727	798	Intergenic	Intergenic	21548	LOC115711695	LOC115711695	XM_030640076	UDP-glycosyltransferase 73C3	protein_coding	5.387787295	2.70E-07	7.25E-06	6.959172456	7.55E-08	1.62E-06
0.00018652557296004233-2	NC_044378.1	48661401	48662999	+	59.9727	1598	Intergenic	Intergenic	154079	LOC115696618	LOC115696618	XM_030623512	uncharacterized LOC115696618	protein_coding	NA	NA	NA	NA	NA	NA
6.400445229945383e-10	NC_044377.1	42848801	42852199	+	59.9727	3398	Intergenic	Intergenic	38473	LOC115695200	LOC115695200	XM_030622285	uncharacterized LOC115695200	protein_coding	NA	NA	NA	NA	NA	NA
0.00018652557296004233	NC_044372.1	6039401	6040399	+	59.9727	998	Intergenic	Intergenic	8545	LOC115710359	LOC115710359	XM_030638729	uncharacterized LOC115710359	protein_coding	NA	NA	NA	NA	NA	NA
7.494339304234321e-08	NC_044377.1	29539601	29542799	+	59.9343	3198	Intergenic	Intergenic	64704	LOC115725629	LOC115725629	XM_030655210	uncharacterized LOC115725629	protein_coding	0.023638741	1	1	0.335577302	1	1
1.7278458931219634e-06	NC_044373.1	55975201	55977199	+	59.9233	1998	Intergenic	Intergenic	10844	LOC115712157	LOC115712157	XM_030640401	monooxygenase 2	protein_coding	0.998489565	1	1	-0.601998133	1	1
0.00020585497654322568-2	NC_044374.1	59182201	59183199	+	59.8858	998	Intergenic	Intergenic	-12887	LOC115717332	LOC115717332	XM_030646305	DEAD-box ATP-dependent RNA helicase 7	protein_coding	0.514955209	1	1	-0.883635972	1	1
0.00020585497654322568-3	NC_044379.1	12322201	12323199	+	59.8858	998	Intergenic	Intergenic	-5816	LOC115701554	LOC115701554	XM_030629371	secoisolariciresinol dehydrogenase-like	protein_coding	NA	NA	NA	NA	NA	NA
3.9458237422331517e-07	NC_044372.1	19028601	19030999	+	59.8858	2398	Intergenic	Intergenic	63207	LOC115710505	LOC115710505	XM_030638870	uncharacterized LOC115710505	protein_coding	NA	NA	NA	NA	NA	NA
0.00020585497654322568	NC_044372.1	22215201	22216799	+	59.8858	1598	Intergenic	Intergenic	9837	LOC115709376	LOC115709376	XM_030637464	tetraspanin-11-like	protein_coding	2.955199822	0.61554997	NA	2.580795288	0.684733146	NA
1.9028098301062e-08	NC_044372.1	56568601	56570799	+	59.8681	2198	Intergenic	Intergenic	33528	LOC115711790	LOC115711790	XR_004010665	small nucleolar RNA R71	snoRNA	NA	NA	NA	NA	NA	NA
0.001051722259899512	NC_044373.1	56979401	56980199	+	59.8563	798	Intergenic	Intergenic	61504	LOC115713014	LOC115713014	XR_004010974	uncharacterized LOC115713014	lncRNA	-1.512629836	0.90002605	NA	0	1	NA
9.24571903256801e-06-2	NW_022060446.1	48601	49999	+	59.8563	1398	Intergenic	Intergenic	-11330	LOC115702107	LOC115702107	XM_030629562	#N/A	protein_coding	0.418670574	1	1	1.054263026	0.836778604	1
9.24571903256801e-06	NC_044375.1	13384601	13385999	+	59.8563	1398	Intergenic	Intergenic	76649	LOC115719866	LOC115719866	XM_030649046	two-component response regulator ARR22-like	protein_coding	NA	NA	NA	NA	NA	NA
0.001051722259899512-3	NC_044377.1	43367801	43368399	+	59.8563	598	Intergenic	Intergenic	-307881	LOC115695201	LOC115695201	XM_030622286	uncharacterized LOC115695201	protein_coding	NA	NA	NA	NA	NA	NA
0.001051722259899512-2	NC_044375.1	3314001	3314799	+	59.8563	798	Intergenic	Intergenic	-6532	LOC115718784	LOC115718784	XR_004012037	uncharacterized LOC115718784	lncRNA	0	1	NA	-0.925217262	1	NA
4.41023147434382e-09	NC_044378.1	51505801	51508399	+	59.8456	2598	Intergenic	Intergenic	11790	LOC115698221	LOC115698221	XR_004008075	uncharacterized LOC115698221	lncRNA	0.911795263	1	NA	2.460944311	0.714651244	NA
4.796522648702651e-62	NC_044370.1	104966401	104987199	+	59.8333	20798	Intergenic	Intergenic	14759	LOC115697014	LOC115697014	XM_030623917	uncharacterized LOC115697014	protein_coding	-0.497403536	1	1	-0.165292202	1	1
4.5466621163938965e-05	NC_044370.1	42916801	42918799	+	59.8326	1998	Intergenic	Intergenic	-29591	LOC115720503	LOC115720503	XM_030649650	uncharacterized LOC115720503	protein_coding	NA	NA	NA	NA	NA	NA
4.5466621163938965e-05-2	NC_044375.1	40147801	40149399	+	59.8326	1598	Intergenic	Intergenic	-31156	LOC115719121	LOC115719121	XM_030648044	uncharacterized protein Mb0911c	protein_coding	0.871398591	1	1	4.051909432	0.037579481	0.259423905
9.967980969827642e-08	NC_044372.1	52972201	52974199	+	59.8167	1998	Intergenic	Intergenic	73364	LOC115711878	LOC115711878	XR_004010746	small nucleolar RNA R71	snoRNA	NA	NA	NA	NA	NA	NA
2.3914849890746257e-10	NC_044379.1	1677401	1680399	+	59.8105	2998	Intergenic	Intergenic	-1110889	LOC115698919	LOC115698919	XM_030626122	extracellular ribonuclease LE	protein_coding	6.151631711	1.47E-17	1.49E-15	3.483828726	2.08E-15	9.58E-14
3.6444363795763926e-16	NC_044377.1	15696001	15702199	+	59.7967	6198	Intergenic	Intergenic	-93371	LOC115695005	LOC115695005	XM_030622104	uncharacterized LOC115695005	protein_coding	NA	NA	NA	NA	NA	NA
0.0002272021971839821-4	NC_044376.1	16756401	16757399	+	59.7967	998	Intergenic	Intergenic	-14866	LOC115723616	LOC115723616	XM_030653101	uncharacterized LOC115723616	protein_coding	NA	NA	NA	NA	NA	NA
0.0002272021971839821	NC_044372.1	20313801	20314799	+	59.7967	998	Intergenic	Intergenic	30844	LOC115711591	LOC115711591	XM_030639956	two-component response regulator-like APRR1	protein_coding	1.408126358	0.28158469	1	0.099770987	1	1
0.0002272021971839821-2	NC_044373.1	52876201	52876999	+	59.7967	798	Intergenic	Intergenic	-106556	LOC115713504	LOC115713504	XM_030641986	uncharacterized LOC115713504	protein_coding	NA	NA	NA	NA	NA	NA
0.0002272021971839821-3	NC_044373.1	83209201	83210399	+	59.7967	1198	Intergenic	Intergenic	26591	LOC115712668	LOC115712668	XM_030640995	BTB/POZ domain-containing protein At3g50780	protein_coding	-1.193222494	0.319264582	1	-0.141624129	1	1
2.627477867403202e-10	NC_044375.1	10888401	10891599	+	59.7828	3198	TTS	-TTS (LOC115721386)	1522	LOC115721386	LOC115721386	XM_030650672	uncharacterized LOC115721386	protein_coding	NA	NA	NA	NA	NA	NA
5.3279071300678754e-09	NC_044375.1	24613401	24615799	+	59.7802	2398	Intergenic	Intergenic	-22185	LOC115721576	LOC115721576	XR_004012591	small nucleolar RNA R71	snoRNA	NA	NA	NA	NA	NA	NA
0.0011630594593908046-2	NC_044375.1	41786001	41786799	+	59.736	798	Intergenic	Intergenic	7462	LOC115720105	LOC115720105	XM_030649267	uncharacterized LOC115720105	protein_coding	NA	NA	NA	NA	NA	NA
0.0011630594593908046	NC_044370.1	3912401	3913199	+	59.736	798	Intergenic	Intergenic	-4891	LOC115702989	LOC115702989	XM_030630461	protein TIC 21, chloroplastic	protein_coding	-0.910972631	1	1	-0.048274987	1	1
1.4173530532959456e-30	NC_044375.1	96315601	96325399	+	59.7197	9798	Intergenic	Intergenic	15006	LOC115719675	LOC115719675	XM_030648805	pre-rRNA-processing protein TSR2 homolog,	protein_coding	-0.484977883	1	1	-0.279677658	1	1
2.5363350049722927e-06	NC_044378.1	48631401	48632999	+	59.7185	1598	Intergenic	Intergenic	184079	LOC115696618	LOC115696618	XM_030623512	uncharacterized LOC115696618	protein_coding	NA	NA	NA	NA	NA	NA
5.781037821658256e-07	NC_044375.1	32980001	32981999	+	59.7053	1998	Intergenic	Intergenic	5178	LOC115721508	LOC115721508	XR_004012527	small nucleolar RNA R71	snoRNA	NA	NA	NA	NA	NA	NA
5.781037821658256e-07-2	NC_044375.1	34980401	34982599	+	59.7053	2198	Intergenic	Intergenic	32583	LOC115720044	LOC115720044	XM_030649209	uncharacterized LOC115720044	protein_coding	NA	NA	NA	NA	NA	NA
0.00025077977332008377	NC_044378.1	5761201	5762799	+	59.7053	1598	intron	-intron (LOC115696440, intron 3 of 4)	5586	LOC115696440	LOC115696440	XM_030623341	tropinone reductase homolog At5g06060-like	protein_coding	0.997467905	1	1	4.958917308	1.75E-08	4.03E-07
5.525467853696617e-05	NC_044373.1	2570001	2571199	+	59.6868	1198	Intergenic	Intergenic	-15067	LOC115714189	LOC115714189	XM_030642767	protein TIFY 6B,	protein_coding	-0.356602949	1	1	1.448234038	0.203089176	1
1.6433432743315382e-09	NC_044373.1	42835001	42837799	+	59.6743	2798	Intergenic	Intergenic	5792	LOC115713437	LOC115713437	XM_030641920	stress response protein NST1-like	protein_coding	0.333047658	1	NA	0.920448172	1	NA
1.2354464212520204e-05	NC_044373.1	9575001	9576599	+	59.6743	1598	Intergenic	Intergenic	-20070	LOC115712131	LOC115712131	XM_030640370	uncharacterized LOC115712131,	protein_coding	0.126083252	1	1	-0.029093516	1	1
0.0012863385946344874-3	NC_044375.1	64778201	64778799	+	59.6116	598	Intergenic	Intergenic	27971	LOC115718903	LOC115718903	XM_030647713	uncharacterized LOC115718903	protein_coding	-1.512629836	0.90002605	NA	0	1	NA
6.997975591428619e-07	NC_044378.1	14130001	14131799	+	59.6116	1798	Intergenic	Intergenic	9523	LOC115696363	LOC115696363	XM_030623264	uncharacterized LOC115696363	protein_coding	NA	NA	NA	NA	NA	NA
0.0002768228799965546-3	NC_044375.1	17340801	17341799	+	59.6116	998	Intergenic	Intergenic	-12613	LOC115719922	LOC115719922	XM_030649095	bidirectional sugar transporter SWEET14-like	protein_coding	NA	NA	NA	NA	NA	NA
0.0012863385946344874	NC_044370.1	49748801	49749599	+	59.6116	798	Intergenic	Intergenic	-89155	LOC115711897	LOC115711897	XM_030640111	outer envelope pore protein 21, chloroplastic	protein_coding	-0.881780829	1	1	-0.309245115	1	1
0.0002768228799965546	NC_044371.1	9232601	9233599	+	59.6116	998	Intergenic	Intergenic	-18308	LOC115704844	LOC115704844	XM_030632055	putative acyl-activating enzyme 19	protein_coding	0.440727085	1	1	0.069470344	1	1
0.0002768228799965546-2	NC_044375.1	10154401	10155399	+	59.6116	998	Intergenic	Intergenic	-10251	LOC115719434	LOC115719434	XM_030648486	uncharacterized LOC115719434,	protein_coding	0.626973416	1	1	-0.901749307	1	1
0.0012863385946344874-2	NC_044372.1	34955801	34956399	+	59.6116	598	Intergenic	Intergenic	22670	LOC115708960	LOC115708960	XM_030636984	UDP-glycosyltransferase 73D1	protein_coding	-0.849937952	1	1	4.645817706	0.038527606	0.264574193
0.0012863385946344874-4	NC_044377.1	35945001	35945599	+	59.6116	598	Intergenic	Intergenic	15954	LOC115695129	LOC115695129	XM_030622220	uncharacterized LOC115695129	protein_coding	NA	NA	NA	NA	NA	NA
1.360844315965145e-05	NC_044376.1	16047001	16048399	+	59.6116	1398	Intergenic	Intergenic	9004	LOC115723612	LOC115723612	XM_030653097	uncharacterized LOC115723612	protein_coding	1.894926023	0.82273136	NA	2.482294214	0.710578192	NA
3.073296545211599e-06	NC_044375.1	74880201	74882199	+	59.6116	1998	Intergenic	Intergenic	22881	LOC115718555	LOC115718555	XM_030647354	dof zinc finger protein DOF2.4	protein_coding	-1.037962163	0.930531564	1	0.208082395	1	1
6.091641432919784e-05	NC_044373.1	39715801	39716999	+	59.6116	1198	Intergenic	Intergenic	-4667	LOC115715451	LOC115715451	XR_004011322	small nucleolar RNA R71	snoRNA	NA	NA	NA	NA	NA	NA
6.091641432919784e-05-2	NW_022060454.1	636401	637599	+	59.6116	1198	Intergenic	Intergenic	132842	LOC115702127	LOC115702127	XM_030629586	#N/A	protein_coding	-1.078418672	0.906335909	1	0.136444746	1	1
1.7638275252469061e-07	NC_044371.1	7550601	7551799	+	59.5692	1198	Intergenic	Intergenic	-17935	LOC115703734	LOC115703734	XM_030630967	GDSL esterase/lipase At2g40250-like	protein_coding	3.939305009	0.330999469	NA	4.526682423	0.243462713	1
7.699526929894008e-07	NC_044370.1	7282201	7284599	+	59.5638	2398	Intergenic	Intergenic	-3660	LOC115703235	LOC115703235	XM_030630751	pentatricopeptide repeat-containing protein At2g15820, chloroplastic	protein_coding	-1.475091051	0.001252589	0.014023604	0.553858302	1	1
1.499011565227885e-05	NC_044379.1	19485201	19486599	+	59.5478	1398	Intergenic	Intergenic	-57161	LOC115699903	LOC115699903	XM_030627447	uncharacterized LOC115699903	protein_coding	0	1	NA	-0.925217262	1	NA
6.716114757106378e-05	NC_044372.1	8785201	8786999	+	59.5349	1798	Intergenic	Intergenic	9122	LOC115710308	LOC115710308	XM_030638676	beta carbonic anhydrase 4	protein_coding	5.672585875	0.001774497	0.018929605	-2.482726198	0.109065792	0.625599345
4.4659288873499e-08	NC_044370.1	89153801	89156199	+	59.5349	2398	Intergenic	Intergenic	41553	LOC115702838	LOC115702838	XR_004008959	uncharacterized LOC115702838	lncRNA	0.931928976	1	NA	1.519334642	0.834185067	NA
8.471518655225631e-07	NC_044375.1	57439001	57440399	+	59.5154	1398	Intergenic	Intergenic	11058	LOC115721522	LOC115721522	XR_004012538	small nucleolar RNA R71	snoRNA	NA	NA	NA	NA	NA	NA
0.0003055917735425918-4	NC_044376.1	53745801	53746799	+	59.5154	998	Intergenic	Intergenic	-130413	LOC115724262	LOC115724262	XR_004013061	small nucleolar RNA R71	snoRNA	NA	NA	NA	NA	NA	NA
0.0003055917735425918-5	NC_044377.1	710601	711399	+	59.5154	798	Intergenic	Intergenic	-5713	LOC115694679	LOC115694679	XR_004007436	uncharacterized LOC115694679	lncRNA	0.410947537	1	NA	0.998328082	1	NA
0.0003055917735425918	NC_044373.1	37252201	37253199	+	59.5154	998	Intergenic	Intergenic	-37522	LOC115715514	LOC115715514	XR_004011382	small nucleolar RNA R71	snoRNA	NA	NA	NA	NA	NA	NA
0.0003055917735425918-2	NC_044375.1	17006601	17007799	+	59.5154	1198	Intergenic	Intergenic	47292	LOC115721273	LOC115721273	XM_030650539	uncharacterized LOC115721273	protein_coding	3.559407667	0.012821739	0.099064426	0.991099154	1	1
0.0003055917735425918-3	NC_044375.1	67323401	67324399	+	59.5154	998	Intergenic	Intergenic	15796	LOC115720287	LOC115720287	XM_030649442	protein piccolo-like	protein_coding	NA	NA	NA	NA	NA	NA
3.724214312745172e-06	NC_044378.1	49365201	49366799	+	59.5015	1598	Intergenic	Intergenic	-16560	LOC115697836	LOC115697836	XM_030624978	berberine bridge enzyme-like 26	protein_coding	3.08540456	0.000118462	0.001811604	0.407931654	1	1
0.001422862408446912-2	NC_044375.1	43557201	43557799	+	59.4828	598	Intergenic	Intergenic	-237495	LOC115721317	LOC115721317	XM_030650591	tropomyosin-2-like	protein_coding	0.234417585	1	1	-1.706036753	0.502563852	1
2.1335518020796092e-07	NC_044371.1	22565001	22566999	+	59.4828	1998	exon	-exon (LOC115703897, exon 2 of 4)	2173	LOC115703897	LOC115703897	XM_030631134	uncharacterized LOC115703897	protein_coding	-1.512629836	0.90002605	NA	0	1	NA
0.001422862408446912	NC_044374.1	79733601	79734399	+	59.4828	798	Intergenic	Intergenic	24471	LOC115715888	LOC115715888	XM_030644565	expansin-like B1	protein_coding	1.39996687	0.575987851	1	-2.01161888	0.152121308	0.820335663
1.2475969806750575e-08	NC_044373.1	60076601	60079599	+	59.4709	2998	Intergenic	Intergenic	-46204	LOC115715398	LOC115715398	XR_004011272	small nucleolar RNA R71	snoRNA	NA	NA	NA	NA	NA	NA
7.404926106732231e-05	NC_044379.1	49090201	49091599	+	59.4565	1398	Intergenic	Intergenic	29771	LOC115700205	LOC115700205	XM_030627768	uncharacterized LOC115700205	protein_coding	NA	NA	NA	NA	NA	NA
1.0255876209280948e-06	NW_022060454.1	513801	515599	+	59.4168	1798	Intergenic	Intergenic	10542	LOC115702127	LOC115702127	XM_030629586	#N/A	protein_coding	-1.078418672	0.906335909	1	0.136444746	1	1
1.819008840942833e-05-7	NC_044379.1	1953201	1954599	+	59.4168	1398	Intergenic	Intergenic	-835889	LOC115698919	LOC115698919	XM_030626122	extracellular ribonuclease LE	protein_coding	6.151631711	1.47E-17	1.49E-15	3.483828726	2.08E-15	9.58E-14
1.819008840942833e-05-3	NC_044372.1	64858601	64860599	+	59.4168	1998	Intergenic	Intergenic	-5518	LOC115710862	LOC115710862	XM_030639217	F-box protein SKIP23-like	protein_coding	0.410947537	1	NA	0.998328082	1	NA
1.819008840942833e-05-6	NC_044375.1	54735401	54736799	+	59.4168	1398	Intergenic	Intergenic	134641	LOC115718674	LOC115718674	XM_030647495	zinc finger protein WIP5	protein_coding	1.200110357	0.673590619	1	-1.804768571	0.054712051	0.353352412
0.0003373745049543917	NC_044372.1	55730001	55730999	+	59.4168	998	Intergenic	Intergenic	6229	TRNAK-UUU_5	TRNAK-UUU_5	TRNAK-UUU_5	#N/A	tRNA	0	1	NA	-0.925217262	1	NA
1.819008840942833e-05-2	NC_044370.1	57902401	57903799	+	59.4168	1398	Intergenic	Intergenic	-7199	LOC115703289	LOC115703289	XR_004009065	small nucleolar RNA R71	snoRNA	NA	NA	NA	NA	NA	NA
1.819008840942833e-05-5	NC_044375.1	27642401	27643999	+	59.4168	1598	Intergenic	Intergenic	-17734	LOC115719992	LOC115719992	XM_030649162	uncharacterized LOC115719992	protein_coding	NA	NA	NA	NA	NA	NA
1.819008840942833e-05	NC_044370.1	28337401	28339399	+	59.4168	1998	Intergenic	Intergenic	-9924	LOC115709159	LOC115709159	XM_030637200	UPF0664 stress-induced protein C29B12.11c	protein_coding	0.135685648	1	1	0.130306402	1	1
1.819008840942833e-05-4	NC_044374.1	39260601	39262199	+	59.4168	1598	Intergenic	Intergenic	54698	LOC115717747	LOC115717747	XM_030646726	zinc finger BED domain-containing protein DAYSLEEPER-like	protein_coding	NA	NA	NA	NA	NA	NA
4.513339189587128e-06	NC_044377.1	20848401	20849599	+	59.3881	1198	Intergenic	Intergenic	21027	LOC115695039	LOC115695039	XM_030622137	uncharacterized LOC115695039	protein_coding	NA	NA	NA	NA	NA	NA
8.164743534023536e-05	NC_044376.1	53913401	53914399	+	59.3766	998	Intergenic	Intergenic	-36538	LOC115723914	LOC115723914	XM_030653374	uncharacterized LOC115723914	protein_coding	NA	NA	NA	NA	NA	NA
1.4427382620336067e-14	NC_044376.1	61529601	61534599	+	59.3689	4998	Intergenic	Intergenic	19259	LOC115722659	LOC115722659	XM_030651921	protein TIC 40, chloroplastic,	protein_coding	-0.465107829	1	1	-0.010789331	1	1
2.0038650072616773e-05	NC_044371.1	10235201	10237199	+	59.3495	1998	Intergenic	Intergenic	7811	LOC115708406	LOC115708406	XR_004009908	small nucleolar RNA R71	snoRNA	NA	NA	NA	NA	NA	NA
0.001574078946962012	NC_044370.1	77702201	77702799	+	59.3495	598	Intergenic	Intergenic	-6073	LOC115724998	LOC115724998	XM_030654396	uncharacterized LOC115724998	protein_coding	NA	NA	NA	NA	NA	NA
2.838594805931661e-07	NC_044371.1	54502601	54504799	+	59.3495	2198	Intergenic	Intergenic	-407773	LOC115704145	LOC115704145	XM_030631362	uncharacterized LOC115704145	protein_coding	NA	NA	NA	NA	NA	NA
4.968694449446046e-06	NC_044370.1	99357601	99359199	+	59.3301	1598	exon	-exon (LOC115696312, exon 1 of 1)	517	LOC115696312	LOC115696312	XM_030623220	uncharacterized LOC115696312	protein_coding	NA	NA	NA	NA	NA	NA
0.00037248993219038764-4	NC_044379.1	56125801	56126799	+	59.3155	998	intron	-intron (LOC115701401, intron 2 of 2)	9535	LOC115701034	LOC115701034	XM_030628718	malonyl-CoA:anthocyanidin 5-O-glucoside-6''-O-malonyltransferase	protein_coding	-0.052197841	1	1	0.979826954	1	1
0.00037248993219038764	NC_044373.1	46255201	46256199	+	59.3155	998	Intergenic	Intergenic	23862	LOC115712828	LOC115712828	XM_030641217	inositol-3-phosphate synthase	protein_coding	-2.075878199	0.000665951	0.008259081	3.521743864	1.77E-15	8.19E-14
0.00037248993219038764-2	NC_044377.1	26391601	26392599	+	59.3155	998	Intergenic	Intergenic	76282	LOC115724541	LOC115724541	XM_030653845	trafficking protein particle complex II-specific subunit 120 homolog	protein_coding	0.525730556	1	1	-0.089131607	1	1
0.00037248993219038764-3	NC_044379.1	22579201	22579999	+	59.3155	798	intron	-intron (LOC115698491, intron 1 of 4)	3585	LOC115698491	LOC115698491	XM_030625563	proteasome subunit beta type-6,	protein_coding	0.056503336	1	1	-0.086389785	1	1
3.1220856391626856e-07	NC_044373.1	42855801	42858399	+	59.304	2598	Intergenic	Intergenic	26492	LOC115713437	LOC115713437	XM_030641920	stress response protein NST1-like	protein_coding	0.333047658	1	NA	0.920448172	1	NA
7.88938674246616e-08	NC_044372.1	43774801	43777799	+	59.2949	2998	Intergenic	Intergenic	47071	LOC115708986	LOC115708986	XM_030637005	heat shock protein 83-like,	protein_coding	NA	NA	NA	NA	NA	NA
9.002931100033222e-05-3	NC_044378.1	11405401	11406399	+	59.2949	998	Intergenic	Intergenic	12507	LOC115697295	LOC115697295	XM_030624242	uncharacterized LOC115697295	protein_coding	-1.300473907	0.137082712	0.67585047	-0.045281607	1	1
9.002931100033222e-05-2	NC_044375.1	58131601	58133199	+	59.2949	1598	Intergenic	Intergenic	-51908	LOC115719505	LOC115719505	XM_030648578	serine carboxypeptidase-like	protein_coding	1.115067835	0.539103269	1	0.200594146	1	1
9.002931100033222e-05	NC_044374.1	19238601	19239599	+	59.2949	998	Intergenic	Intergenic	223955	LOC115715760	LOC115715760	XM_030644431	metalloendoproteinase 4-MMP	protein_coding	3.601211935	0.034742491	0.227626073	0.244475174	1	1
9.002931100033222e-05-4	NC_044379.1	5415201	5416199	+	59.2949	998	Intergenic	Intergenic	-129580	LOC115701194	LOC115701194	XM_030628916	39S ribosomal protein L28, mitochondrial	protein_coding	-0.292764956	1	1	-0.319866486	1	1
5.0968977498104166e-09	NC_044370.1	70497001	70499599	+	59.2811	2598	Intergenic	Intergenic	5754	LOC115723794	LOC115723794	XM_030653266	uncharacterized LOC115723794	protein_coding	0.410947537	1	NA	0.998328082	1	NA
2.207571889811331e-05	NC_044376.1	139401	140799	+	59.2811	1398	Intergenic	Intergenic	5964	LOC115722088	LOC115722088	XM_030651209	epsin-3	protein_coding	8.157731771	8.22E-08	2.40E-06	4.48014955	5.91E-06	9.65E-05
1.301553344331139e-09-2	NC_044377.1	29153801	29157599	+	59.2758	3798	intron	-intron (LOC115695970, intron 3 of 4)	10874	LOC115695970	LOC115695970	XM_030623083	gibberellin 2-beta-dioxygenase 8,	protein_coding	-1.890630154	0.015079709	0.113499311	-3.261268656	2.63E-10	7.56E-09
1.301553344331139e-09	NC_044370.1	20807401	20810599	+	59.2758	3198	Intergenic	Intergenic	9279	LOC115717940	LOC115717940	XM_030646909	uncharacterized LOC115717940	protein_coding	NA	NA	NA	NA	NA	NA
5.470098982037693e-06-2	NC_044374.1	24104201	24106199	+	59.2712	1998	Intergenic	Intergenic	-25287	LOC115717663	LOC115717663	XM_030646646	uncharacterized LOC115717663	protein_coding	NA	NA	NA	NA	NA	NA
5.470098982037693e-06	NC_044373.1	26605401	26607599	+	59.2712	2198	Intergenic	Intergenic	-30404	LOC115713289	LOC115713289	XM_030641769	uncharacterized LOC115713289	protein_coding	NA	NA	NA	NA	NA	NA
1.3662602095613155e-06	NC_044373.1	63465401	63467599	+	59.2638	2198	Intergenic	Intergenic	35568	LOC115712143	LOC115712143	XR_004010795	uncharacterized LOC115712143	lncRNA	NA	NA	NA	NA	NA	NA
1.3662602095613155e-06-2	NC_044373.1	85515401	85517599	+	59.2638	2198	Intergenic	Intergenic	9413	LOC115715170	LOC115715170	XM_030643992	protein FMP32, mitochondrial	protein_coding	-0.431103794	1	1	0.156534934	1	1
1.430032597481574e-09	NC_044371.1	57356801	57359599	+	59.2437	2798	Intergenic	Intergenic	-5885	LOC115704158	LOC115704158	XM_030631374	uncharacterized LOC115704158	protein_coding	NA	NA	NA	NA	NA	NA
3.6603712235899607e-10	NC_044379.1	48434401	48436199	+	59.2414	1798	Intergenic	Intergenic	13848	LOC115700201	LOC115700201	XM_030627764	uncharacterized LOC115700201	protein_coding	NA	NA	NA	NA	NA	NA
9.92762214993447e-05-3	NC_044378.1	32074601	32075999	+	59.2114	1398	Intergenic	Intergenic	-10974	LOC115697233	LOC115697233	XR_004007919	uncharacterized LOC115697233	lncRNA	NA	NA	NA	NA	NA	NA
0.0017415982504531712	NC_044370.1	51511601	51512199	+	59.2114	598	Intergenic	Intergenic	28164	LOC115708007	LOC115708007	XR_004009809	uncharacterized LOC115708007	lncRNA	NA	NA	NA	NA	NA	NA
9.92762214993447e-05-2	NC_044373.1	5084801	5085999	+	59.2114	1198	Intergenic	Intergenic	-17618	LOC115712836	LOC115712836	XR_004010952	uncharacterized LOC115712836	lncRNA	NA	NA	NA	NA	NA	NA
3.776937534414588e-07	NC_044373.1	68994201	68995399	+	59.2114	1198	Intergenic	Intergenic	-5848	LOC115712111	LOC115712111	XM_030640346	uncharacterized metal-dependent hydrolase YabD	protein_coding	-0.17812921	1	1	0.139673936	1	1
2.432059436659218e-05-3	NC_044375.1	2865401	2866999	+	59.2114	1598	Intergenic	Intergenic	22579	LOC115718859	LOC115718859	XR_004012069	uncharacterized LOC115718859,	lncRNA	-0.725171753	1	1	-0.534053687	1	1
6.022221981810781e-06	NC_044370.1	73288801	73290399	+	59.2114	1598	Intergenic	Intergenic	4000	LOC115724554	LOC115724554	XM_030653862	sentrin-specific protease 1-like	protein_coding	NA	NA	NA	NA	NA	NA
2.432059436659218e-05-2	NC_044374.1	31552201	31553599	+	59.2114	1398	Intergenic	Intergenic	13845	LOC115718148	LOC115718148	XR_004011767	uncharacterized LOC115718148	lncRNA	NA	NA	NA	NA	NA	NA
9.92762214993447e-05	NC_044370.1	84351001	84352799	+	59.2114	1798	Intergenic	Intergenic	88665	LOC115725514	LOC115725514	XM_030655067	uncharacterized LOC115725514	protein_coding	NA	NA	NA	NA	NA	NA
0.0004112910650804386-2	NW_022060514.1	23801	24599	+	59.2114	798	NA	NA	NA	NA			#N/A		NA	NA	NA	NA	NA	NA
0.0004112910650804386	NC_044372.1	24379401	24380199	+	59.2114	798	exon	-exon (LOC115710560, exon 2 of 3)	273	LOC115710560	LOC115710560	XM_030638921	stress response protein nst1-like	protein_coding	NA	NA	NA	NA	NA	NA
2.432059436659218e-05	NC_044371.1	24846001	24847599	+	59.2114	1598	Intergenic	Intergenic	-25752	LOC115705205	LOC115705205	XM_030632469	nuclear transport factor 2,	protein_coding	-0.465086811	1	1	-1.04158155	0.826716818	1
9.537672216925528e-08	NC_044374.1	54478801	54481799	+	59.2114	2998	intron	-intron (LOC115717852, intron 1 of 2)	1477	LOC115717852	LOC115717852	XM_030646822	uncharacterized LOC115717852	protein_coding	NA	NA	NA	NA	NA	NA
2.432059436659218e-05-4	NC_044376.1	49869601	49870999	+	59.2114	1398	Intergenic	Intergenic	-16458	LOC115722713	LOC115722713	XM_030651996	eIF-2-alpha kinase GCN2,	protein_coding	-0.132372093	1	1	-0.279142359	1	1
1.0486876360654661e-07	NC_044379.1	4279801	4281999	+	59.169	2198	Intergenic	Intergenic	-42841	LOC115698615	LOC115698615	XM_030625733	zinc finger CCCH domain-containing protein 48-like	protein_coding	-1.512629836	0.90002605	NA	0	1	NA
4.154257779797648e-07	NC_044375.1	65573401	65575999	+	59.1642	2598	Intergenic	Intergenic	39391	LOC115718822	LOC115718822	XM_030647638	dicarboxylate transporter 1, chloroplastic	protein_coding	-1.350414028	0.002819778	0.027969345	0.625113746	1	1
2.679456097899086e-05	NC_044379.1	4268401	4270199	+	59.1405	1798	Intergenic	Intergenic	51161	LOC115701534	LOC115701534	XM_030629350	zinc finger CCCH domain-containing protein 48	protein_coding	0.555112318	1	1	0.260355056	1	1
0.00010947800383861814	NC_044374.1	55963401	55964399	+	59.1261	998	Intergenic	Intergenic	-27295	LOC115716233	LOC115716233	XM_030644985	probable mediator of RNA polymerase II transcription subunit 37e	protein_coding	-1.225766947	0.40300161	1	-0.782706728	1	1
2.552845255915391e-51	NC_044378.1	35885601	35904399	+	59.1221	18798	intron	-intron (LOC115696531, intron 28 of 28)	22643	LOC115696531	LOC115696531	XM_030623428	TATA-binding protein-associated factor BTAF1	protein_coding	-0.578413255	1	1	0.215136589	1	1
0.00045416878046533626	NC_044371.1	91578001	91578999	+	59.1045	998	intron	-intron (LOC115707345, intron 2 of 2)	3711	LOC115707345	LOC115707345	XM_030635274	disease resistance RPP13-like protein 4	protein_coding	1.059254057	0.927844312	1	-0.256206348	1	1
0.00045416878046533626-2	NC_044373.1	30135801	30136599	+	59.1045	798	Intergenic	Intergenic	21737	LOC115713320	LOC115713320	XM_030641799	uncharacterized LOC115713320	protein_coding	2.150706384	0.497674119	1	0.050221201	1	1
0.00045416878046533626-3	NW_022060417.1	2290001	2290999	+	59.1045	998	Intergenic	Intergenic	16541	LOC115702065	LOC115702065	XM_030629515	#N/A	protein_coding	-0.933735437	1	1	-0.113826937	1	1
3.212351068697449e-08	NC_044371.1	1114801	1116799	+	59.0946	1998	TTS	-TTS (LOC115706647)	6486	LOC115706647	LOC115706647	XM_030634363	ATP-dependent DNA helicase SRS2-like protein At4g25120	protein_coding	0.351981515	1	1	-0.599599559	1	1
7.29972286179691e-06	NC_044372.1	11570801	11572599	+	59.089	1798	Intergenic	Intergenic	14469	LOC115709937	LOC115709937	XM_030638202	28 kDa ribonucleoprotein, chloroplastic	protein_coding	-1.293060014	0.138351374	0.679317614	0.196716219	1	1
0.00192721103832339	NC_044371.1	8538001	8538799	+	59.0682	798	Intergenic	Intergenic	-57894	LOC115704726	LOC115704726	XM_030631933	mannose-1-phosphate guanylyltransferase 1,	protein_coding	-0.330553847	1	1	0.245293811	1	1
2.95210935259292e-05	NC_044373.1	12697401	12698799	+	59.0682	1398	Intergenic	Intergenic	-3421	LOC115715162	LOC115715162	XR_004011183	uncharacterized LOC115715162	lncRNA	NA	NA	NA	NA	NA	NA
2.95210935259292e-05-2	NC_044375.1	46487601	46489399	+	59.0682	1798	Intergenic	Intergenic	44803	LOC115720133	LOC115720133	XM_030649292	LOB domain-containing protein 15-like	protein_coding	-1.935589316	0.682740153	NA	-0.909931883	1	1
2.95210935259292e-05-3	NC_044377.1	24882001	24883799	+	59.0682	1798	Intergenic	Intergenic	-13648	LOC115695060	LOC115695060	XM_030622157	uncharacterized LOC115695060	protein_coding	NA	NA	NA	NA	NA	NA
2.95210935259292e-05-4	NC_044377.1	52457401	52459199	+	59.0682	1798	Intergenic	Intergenic	139502	LOC115696088	LOC115696088	XR_004007686	small nucleolar RNA R71	snoRNA	NA	NA	NA	NA	NA	NA
0.00012073389563396638	NC_044375.1	43917401	43918599	+	59.0389	1198	Intergenic	Intergenic	-93610	LOC115720115	LOC115720115	XM_030649277	uncharacterized LOC115720115	protein_coding	NA	NA	NA	NA	NA	NA
8.037012159931637e-06-2	NC_044375.1	63832201	63833199	+	59.0263	998	Intergenic	Intergenic	112438	LOC115720251	LOC115720251	XM_030649407	uncharacterized LOC115720251	protein_coding	NA	NA	NA	NA	NA	NA
8.037012159931637e-06	NC_044372.1	55527001	55528399	+	59.0263	1398	Intergenic	Intergenic	16346	LOC115710780	LOC115710780	XM_030639130	uncharacterized LOC115710780	protein_coding	NA	NA	NA	NA	NA	NA
3.2526083718920515e-05-3	NW_022060454.1	641401	642599	+	58.9946	1198	Intergenic	Intergenic	137842	LOC115702127	LOC115702127	XM_030629586	#N/A	protein_coding	-1.078418672	0.906335909	1	0.136444746	1	1
2.2042148616706976e-06-2	NC_044374.1	43430801	43432799	+	58.9946	1998	Intergenic	Intergenic	27428	LOC115716754	LOC115716754	XM_030645648	uncharacterized LOC115716754,	protein_coding	1.283059138	0.451434873	1	0.502380659	1	1
3.2526083718920515e-05-2	NW_022060417.1	1110001	1111399	+	58.9946	1398	Intergenic	Intergenic	223418	LOC115702074	LOC115702074	XR_004008792	#N/A	lncRNA	NA	NA	NA	NA	NA	NA
0.0005015559495700344-2	NC_044375.1	73727601	73728599	+	58.9946	998	Intergenic	Intergenic	46839	LOC115719632	LOC115719632	XM_030648744	tropinone reductase homolog At5g06060,	protein_coding	-1.047091786	0.943989059	1	-0.154584617	1	1
0.0005015559495700344	NC_044373.1	63555401	63556199	+	58.9946	798	Intergenic	Intergenic	-53732	LOC115712143	LOC115712143	XR_004010795	uncharacterized LOC115712143	lncRNA	NA	NA	NA	NA	NA	NA
2.2042148616706976e-06	NC_044373.1	67748201	67750599	+	58.9946	2398	Intergenic	Intergenic	-8531	LOC115714824	LOC115714824	XR_004011125	uncharacterized LOC115714824	lncRNA	NA	NA	NA	NA	NA	NA
3.2526083718920515e-05	NW_022060386.1	3401	4999	+	58.9946	1598	NA	NA	NA	NA			#N/A		NA	NA	NA	NA	NA	NA
8.848955071854447e-06	NC_044377.1	31856801	31857599	+	58.9627	798	Intergenic	Intergenic	21690	LOC115695103	LOC115695103	XM_030622195	uncharacterized LOC115695103	protein_coding	NA	NA	NA	NA	NA	NA
0.00013315352785783037-3	NW_022060454.1	287201	288199	+	58.9498	998	Intergenic	Intergenic	-216458	LOC115702127	LOC115702127	XM_030629586	#N/A	protein_coding	-1.078418672	0.906335909	1	0.136444746	1	1
0.00013315352785783037-2	NC_044378.1	35667201	35668399	+	58.9498	1198	Intergenic	Intergenic	-111786	LOC115696529	LOC115696529	XM_030623427	uncharacterized LOC115696529	protein_coding	NA	NA	NA	NA	NA	NA
0.00013315352785783037	NC_044377.1	66136601	66137599	+	58.9498	998	Intergenic	Intergenic	32740	LOC115695389	LOC115695389	XM_030622455	uncharacterized LOC115695389	protein_coding	NA	NA	NA	NA	NA	NA
2.4255847562811623e-06	NC_044378.1	26103201	26104799	+	58.9385	1598	Intergenic	Intergenic	58481	LOC115697886	LOC115697886	XR_004007997	inactive tetrahydrocannabinolic acid synthase-like	transcribed_pseudogene	7.587114174	3.10E-06	6.76E-05	8.174514626	3.77E-07	7.38E-06
6.68843076845787e-07	NC_044371.1	51858401	51860999	+	58.9197	2598	Intergenic	Intergenic	4603	LOC115705418	LOC115705418	XR_004009460	uncharacterized LOC115705418	lncRNA	NA	NA	NA	NA	NA	NA
3.5838090423191956e-05	NC_044370.1	16582001	16584199	+	58.9197	2198	Intergenic	Intergenic	-6756	LOC115704704	LOC115704704	XM_030631906	L-ascorbate peroxidase 3,	protein_coding	-0.352434772	1	1	0.141045547	1	1
0.002132909639331628	NC_044373.1	42684601	42685199	+	58.9197	598	Intergenic	Intergenic	-37432	LOC115713436	LOC115713436	XM_030641919	uncharacterized LOC115713436	protein_coding	NA	NA	NA	NA	NA	NA
0.002132909639331628-2	NC_044375.1	62814201	62814799	+	58.9197	598	Intergenic	Intergenic	20221	LOC115720244	LOC115720244	XM_030649401	uncharacterized LOC115720244	protein_coding	NA	NA	NA	NA	NA	NA
0.000553932024533561	NC_044378.1	33848001	33849199	+	58.8816	1198	Intergenic	Intergenic	-5511	LOC115698155	LOC115698155	XM_030625336	protein NAP1	protein_coding	-0.151949667	1	1	-0.071958655	1	1
2.6692254841045674e-06	NC_044370.1	61257601	61259599	+	58.8816	1998	Intergenic	Intergenic	-66332	LOC115703365	LOC115703365	XR_004009137	small nucleolar RNA R71	snoRNA	NA	NA	NA	NA	NA	NA
0.000553932024533561-2	NC_044379.1	10060801	10061599	+	58.8816	798	Intergenic	Intergenic	15069	LOC115699817	LOC115699817	XM_030627360	uncharacterized LOC115699817	protein_coding	NA	NA	NA	NA	NA	NA
1.4390164859731369e-08	NC_044374.1	21995801	21999799	+	58.8816	3998	Intergenic	Intergenic	15860	LOC115715633	LOC115715633	XM_030644291	uncharacterized LOC115715633	protein_coding	-0.605927949	1	1	-1.292343379	0.136124384	0.752034569
7.357040016049443e-07	NC_044374.1	62246401	62248199	+	58.8689	1798	Intergenic	Intergenic	16879	LOC115716129	LOC115716129	XM_030644859	TOM1-like protein 3,	protein_coding	0.048250821	1	1	-0.098275722	1	1
0.0001468580236023089	NC_044370.1	59838401	59839399	+	58.8587	998	Intergenic	Intergenic	24843	LOC115702510	LOC115702510	XR_004008903	uncharacterized LOC115702510	lncRNA	NA	NA	NA	NA	NA	NA
2.0377534221389062e-07	NC_044374.1	67457201	67459199	+	58.8587	1998	Intergenic	Intergenic	28243	LOC115716511	LOC115716511	XM_030645320	#N/A	protein_coding	-0.30008321	1	1	0.290657613	1	1
5.66710335668942e-08	NC_044370.1	28936201	28938599	+	58.8503	2398	Intergenic	Intergenic	-9447	LOC115709368	LOC115709368	XM_030637458	sm-like protein LSM3A	protein_coding	0.115126692	1	1	-0.055295113	1	1
1.0727894791133057e-05-2	NC_044377.1	290001	291399	+	58.8322	1398	Intergenic	Intergenic	-25524	LOC115695619	LOC115695619	XM_030622676	heavy metal-associated isoprenylated plant protein 47-like	protein_coding	0.746422942	1	NA	3.745856045	0.208679766	1
1.0727894791133057e-05	NC_044375.1	84401201	84403999	+	58.8322	2798	Intergenic	Intergenic	-17657	LOC115721071	LOC115721071	XM_030650316	uncharacterized LOC115721071	protein_coding	-2.188951316	4.82E-08	1.45E-06	0.735685643	1	1
3.4916421177270523e-10	NC_044371.1	65061401	65063799	+	58.8278	2398	Intergenic	Intergenic	-10477	LOC115705818	LOC115705818	XM_030633260	cytosolic endo-beta-N-acetylglucosaminidase 1	protein_coding	-0.833003002	1	1	-0.296742738	1	1
2.9373818720709127e-06	NC_044378.1	34041201	34042999	+	58.8239	1798	promoter-TSS	-promoter-TSS (LOC115698337)	-55	LOC115698337	LOC115698337	XR_004008094	5S ribosomal RNA	rRNA	0	1	NA	-0.925217262	1	NA
8.092567121305217e-07	NC_044370.1	15261801	15263599	+	58.8175	1798	Intergenic	Intergenic	-7143	LOC115717224	LOC115717224	XM_030646200	uncharacterized protein Mb2253c-like	protein_coding	NA	NA	NA	NA	NA	NA
4.862883017792982e-09	NC_044376.1	17325201	17327999	+	58.8015	2798	exon	-exon (LOC115723624, exon 2 of 3)	342	LOC115723624	LOC115723624	XM_030653109	uncharacterized LOC115723624	protein_coding	-0.550844098	1	NA	-2.396687701	0.528960312	1
8.613984560221293e-12	NC_044376.1	53230401	53233999	+	58.7915	3598	Intergenic	Intergenic	-465336	LOC115724380	LOC115724380	XR_004013173	small nucleolar RNA R71	snoRNA	NA	NA	NA	NA	NA	NA
0.00016198121434374187	NC_044371.1	54205201	54206199	+	58.7654	998	Intergenic	Intergenic	466748	LOC115704139	LOC115704139	XM_030631358	uncharacterized LOC115704139	protein_coding	NA	NA	NA	NA	NA	NA
5.343012304721534e-09	NW_022060386.1	18001	20599	+	58.7654	2598	NA	NA	NA	NA			#N/A		NA	NA	NA	NA	NA	NA
8.901718197770963e-07	NC_044378.1	35283401	35285599	+	58.7654	2198	Intergenic	Intergenic	-41206	LOC115697302	LOC115697302	XM_030624248	probable pre-mRNA-splicing factor ATP-dependent RNA helicase DEAH9,	protein_coding	0.335775776	1	1	-0.027000974	1	1
8.901718197770963e-07-2	NC_044379.1	1944801	1946599	+	58.7654	1798	Intergenic	Intergenic	-844089	LOC115698919	LOC115698919	XM_030626122	extracellular ribonuclease LE	protein_coding	6.151631711	1.47E-17	1.49E-15	3.483828726	2.08E-15	9.58E-14
0.00016198121434374187-2	NC_044373.1	12004601	12006199	+	58.7654	1598	Intergenic	Intergenic	45884	LOC115714256	LOC115714256	XM_030642886	glutaredoxin-C4,	protein_coding	0.757014487	1	1	-0.726336606	1	1
4.351241127981135e-05-2	NC_044377.1	54372001	54373199	+	58.7654	1198	Intergenic	Intergenic	16491	LOC115725265	LOC115725265	XM_030654721	glycosyltransferase BC10,	protein_coding	-0.507842453	1	1	-0.259040957	1	1
4.351241127981135e-05	NC_044375.1	14873401	14874799	+	58.7654	1398	Intergenic	Intergenic	1229	LOC115721540	LOC115721540	XR_004012555	small nucleolar RNA R71	snoRNA	NA	NA	NA	NA	NA	NA
0.002360911451971924	NC_044371.1	3955401	3955999	+	58.7654	598	Intergenic	Intergenic	-26404	LOC115705624	LOC115705624	XM_030633018	21 kDa protein	protein_coding	2.568283059	0.000545018	0.006933734	3.26009046	6.32E-07	1.19E-05
0.002360911451971924-4	NC_044379.1	52353401	52353999	+	58.7654	598	Intergenic	Intergenic	-10732	LOC115700836	LOC115700836	XM_030628500	probable membrane metalloprotease ARASP2, chloroplastic	protein_coding	-1.947437238	5.90E-08	1.75E-06	0.749769189	1	1
0.0006118281365379277-4	NC_044379.1	10206801	10207799	+	58.7654	998	Intergenic	Intergenic	-52938	LOC115701374	LOC115701374	XR_004008536	uncharacterized LOC115701374	lncRNA	-2.996566546	0.399732338	NA	-2.811315405	0.438075474	1
0.0006118281365379277	NC_044371.1	62228801	62229599	+	58.7654	798	Intergenic	Intergenic	26468	LOC115704194	LOC115704194	XM_030631410	uncharacterized LOC115704194	protein_coding	NA	NA	NA	NA	NA	NA
0.0006118281365379277-2	NC_044374.1	40597001	40597799	+	58.7654	798	Intergenic	Intergenic	-9739	LOC115718313	LOC115718313	XR_004011892	small nucleolar RNA R71	snoRNA	NA	NA	NA	NA	NA	NA
0.002360911451971924-2	NC_044372.1	68385401	68385999	+	58.7654	598	Intergenic	Intergenic	-16281	LOC115711506	LOC115711506	XM_030639851	thylakoid membrane protein TERC, chloroplastic,	protein_coding	-1.317050529	0.085909927	0.470363579	0.69881123	1	1
0.002360911451971924-3	NC_044377.1	14270601	14271199	+	58.7654	598	Intergenic	Intergenic	-24042	LOC115695794	LOC115695794	XM_030622879	uncharacterized LOC115695794	protein_coding	-1.717893481	0.001974025	0.020656875	0.650555007	1	1
0.0006118281365379277-3	NC_044377.1	8728801	8729799	+	58.7654	998	Intergenic	Intergenic	-17535	LOC115724861	LOC115724861	XM_030654225	36.4 kDa proline-rich protein,	protein_coding	0.805216037	1	1	0.993972946	1	1
7.527579816817496e-08	NC_044376.1	4352001	4354999	+	58.7223	2998	Intergenic	Intergenic	-4640	LOC115722695	LOC115722695	XM_030651970	uncharacterized mitochondrial protein AtMg00820-like	protein_coding	NA	NA	NA	NA	NA	NA
9.79187233237247e-07	NC_044377.1	24453601	24455599	+	58.7127	1998	Intergenic	Intergenic	414652	LOC115695060	LOC115695060	XM_030622157	uncharacterized LOC115695060	protein_coding	NA	NA	NA	NA	NA	NA
1.4307120299194813e-10	NC_044373.1	70104201	70107599	+	58.7061	3398	TTS	-TTS (LOC115713625)	1568	LOC115713625	LOC115713625	XM_030642112	uncharacterized LOC115713625	protein_coding	0	1	NA	-0.925217262	1	NA
3.55737762744651e-06	NW_022060340.1	194201	195799	+	58.7061	1598	Intergenic	Intergenic	-4310	LOC115701996	LOC115701996	XM_030629463	#N/A	protein_coding	0	1	NA	-2.099682037	0.784224685	NA
4.794781284891555e-05	NC_044370.1	70016201	70017399	+	58.6861	1198	Intergenic	Intergenic	55402	LOC115713762	LOC115713762	XM_030642245	probable serine/threonine-protein kinase PBL21	protein_coding	0.59537565	1	1	0.525693922	1	1
4.794781284891555e-05-2	NC_044374.1	40439801	40441199	+	58.6861	1398	Intergenic	Intergenic	16568	LOC115716569	LOC115716569	XM_030645388	endoribonuclease YBEY, chloroplastic,	protein_coding	-0.820259288	1	1	-0.0223058	1	1
4.794781284891555e-05-4	NC_044379.1	62346601	62347999	+	58.6861	1398	Intergenic	Intergenic	-9820	LOC115699016	LOC115699016	XM_030626226	aquaporin NIP2-2	protein_coding	0	1	NA	-2.285074506	0.748196031	NA
4.794781284891555e-05-3	NC_044377.1	22979401	22980599	+	58.6861	1198	Intergenic	Intergenic	-44061	LOC115695057	LOC115695057	XM_030622155	uncharacterized LOC115695057	protein_coding	-1.512629836	0.90002605	NA	0	1	NA
0.0001786709864544372-4	NC_044378.1	48361001	48361799	+	58.67	798	Intergenic	Intergenic	-64197	LOC115696615	LOC115696615	XM_030623510	uncharacterized LOC115696615	protein_coding	NA	NA	NA	NA	NA	NA
0.0001786709864544372-2	NC_044376.1	21089001	21090799	+	58.67	1798	Intergenic	Intergenic	49954	LOC115723654	LOC115723654	XM_030653137	uncharacterized LOC115723654	protein_coding	NA	NA	NA	NA	NA	NA
0.0001786709864544372	NC_044375.1	67082001	67083399	+	58.67	1398	Intergenic	Intergenic	53180	LOC115720286	LOC115720286	XM_030649441	uncharacterized LOC115720286	protein_coding	NA	NA	NA	NA	NA	NA
0.0001786709864544372-3	NC_044378.1	38117801	38118999	+	58.67	1198	Intergenic	Intergenic	23315	LOC115698027	LOC115698027	XR_004008021	uncharacterized LOC115698027	lncRNA	3.326751962	0.485942891	NA	3.914125128	0.382835663	1
4.8654401357861005e-11	NC_044377.1	66448401	66452399	+	58.653	3998	Intergenic	Intergenic	18922	LOC115724868	LOC115724868	XR_004013297	uncharacterized LOC115724868	lncRNA	NA	NA	NA	NA	NA	NA
3.914934539456373e-06-2	NC_044375.1	6825401	6827399	+	58.6459	1998	Intergenic	Intergenic	3822	LOC115718832	LOC115718832	XM_030647648	germin-like protein 9-3	protein_coding	NA	NA	NA	NA	NA	NA
3.914934539456373e-06	NC_044370.1	21799601	21801399	+	58.6459	1798	Intergenic	Intergenic	-12435	LOC115706511	LOC115706511	XM_030634182	ankyrin-1	protein_coding	-1.956613688	0.000374029	0.005010419	1.485510749	0.078238591	0.474554023
0.0006758327641753741-6	NC_044377.1	8881601	8882399	+	58.6459	798	Intergenic	Intergenic	-12677	LOC115724829	LOC115724829	XM_030654178	probable galactinol--sucrose galactosyltransferase 6,	protein_coding	0.755232474	1	1	0.440415029	1	1
0.0006758327641753741-3	NC_044371.1	68113401	68114199	+	58.6459	798	Intergenic	Intergenic	-21014	LOC115704279	LOC115704279	XM_030631493	uncharacterized LOC115704279	protein_coding	-1.694812535	0.394500563	1	-1.184279605	0.820653356	1
3.914934539456373e-06-3	NC_044376.1	46166801	46169599	+	58.6459	2798	Intergenic	Intergenic	-36654	LOC115724325	LOC115724325	XR_004013122	small nucleolar RNA R71	snoRNA	NA	NA	NA	NA	NA	NA
0.0006758327641753741-4	NC_044374.1	82058201	82058999	+	58.6459	798	Intergenic	Intergenic	14241	LOC115716468	LOC115716468	XM_030645274	aluminum-activated malate transporter 14	protein_coding	-2.227596594	1.47E-14	1.04E-12	3.790498853	4.62E-17	2.43E-15
0.0006758327641753741-5	NC_044376.1	39405001	39405799	+	58.6459	798	Intergenic	Intergenic	31608	LOC115723825	LOC115723825	XM_030653293	stemmadenine O-acetyltransferase-like	protein_coding	6.056956225	0.0001965	0.00283582	2.658939921	0.029330148	0.209662917
0.0006758327641753741	NC_044370.1	56102001	56102999	+	58.6459	998	Intergenic	Intergenic	6889	LOC115702312	LOC115702312	XM_030629760	uncharacterized LOC115702312	protein_coding	0.410947537	1	NA	0.036563417	1	NA
0.0006758327641753741-2	NC_044371.1	22071801	22072599	+	58.6459	798	Intergenic	Intergenic	109235	LOC115708437	LOC115708437	XR_004009937	small nucleolar RNA R71	snoRNA	NA	NA	NA	NA	NA	NA
2.1822477283478875e-09	NC_044374.1	53571201	53573999	+	58.6285	2798	Intergenic	Intergenic	17498	LOC115716619	LOC115716619	XM_030645454	autophagy-related protein 3	protein_coding	0.02478859	1	1	0.176285408	1	1
5.2837114911921974e-05	NC_044370.1	67239601	67240799	+	58.6052	1198	Intergenic	Intergenic	-150573	LOC115713556	LOC115713556	XM_030642046	protein NPGR1,	protein_coding	1.10651835	0.717859013	1	-0.834446534	1	1
0.0026136852587479572-2	NW_022060465.1	511601	512199	+	58.6052	598	Intergenic	Intergenic	16601	LOC115702161	LOC115702161	XR_004008809	#N/A	snoRNA	NA	NA	NA	NA	NA	NA
0.0026136852587479572	NC_044375.1	94684201	94684799	+	58.6052	598	Intergenic	Intergenic	-18877	LOC115720540	LOC115720540	XM_030649684	spermidine coumaroyl-CoA acyltransferase	protein_coding	3.943965248	0.029062709	0.196508074	3.107906381	0.11720693	0.663958498
4.308495341157248e-06	NC_044373.1	70378401	70379399	+	58.5848	998	Intergenic	Intergenic	-23530	LOC115712210	LOC115712210	XM_030640460	LRR receptor-like serine/threonine-protein kinase HSL2	protein_coding	-0.760888279	1	1	-0.177308782	1	1
0.00019709077211431598	NC_044371.1	77549001	77550399	+	58.5724	1398	Intergenic	Intergenic	-15507	LOC115705851	LOC115705851	XM_030633297	pectinesterase 2	protein_coding	3.748503072	7.91E-15	5.89E-13	4.993716074	3.64E-28	4.81E-26
1.577153472958293e-05-2	NC_044378.1	27672201	27673599	+	58.5583	1398	Intergenic	Intergenic	-50514	LOC115696873	LOC115696873	XM_030623759	late embryogenesis abundant protein, group 3	protein_coding	2.334170517	0.054538104	0.328030655	8.031145543	4.98E-18	2.84E-16
1.577153472958293e-05	NC_044377.1	56286201	56287599	+	58.5583	1398	Intergenic	Intergenic	23105	LOC115695286	LOC115695286	XM_030622361	uncharacterized LOC115695286	protein_coding	NA	NA	NA	NA	NA	NA
1.3033707197880668e-06	NC_044375.1	43813001	43814799	+	58.5504	1798	Intergenic	Intergenic	18905	LOC115721317	LOC115721317	XM_030650591	tropomyosin-2-like	protein_coding	0.234417585	1	1	-1.706036753	0.502563852	1
1.0991926592430242e-07	NC_044374.1	63642601	63645599	+	58.5454	2998	Intergenic	Intergenic	15976	LOC115715966	LOC115715966	XM_030644644	PTI1-like tyrosine-protein kinase At3g15890	protein_coding	NA	NA	NA	NA	NA	NA
5.8226980525632233e-05	NC_044372.1	31727001	31728199	+	58.5228	1198	Intergenic	Intergenic	-52360	LOC115709972	LOC115709972	XM_030638254	fasciclin-like arabinogalactan protein 11	protein_coding	3.811620485	1.02E-05	0.0002022	-1.468137096	0.438127069	1
5.8226980525632233e-05-2	NC_044377.1	22961401	22962799	+	58.5228	1398	Intergenic	Intergenic	-26161	LOC115695057	LOC115695057	XM_030622155	uncharacterized LOC115695057	protein_coding	-1.512629836	0.90002605	NA	0	1	NA
0.0007465980376549356	NC_044376.1	12038601	12039399	+	58.5228	798	Intergenic	Intergenic	14540	LOC115721749	LOC115721749	XM_030650822	pyruvate kinase, cytosolic isozyme,	protein_coding	-0.592511737	1	1	-0.08994045	1	1
0.0007465980376549356-2	NC_044376.1	17777401	17778199	+	58.5228	798	Intergenic	Intergenic	27681	LOC115723468	LOC115723468	XM_030652961	LEAF RUST 10 DISEASE-RESISTANCE LOCUS RECEPTOR-LIKE PROTEIN KINASE-like 1.3,	protein_coding	0.40477309	1	1	0.718040429	1	1
0.0007465980376549356-4	NW_022060522.1	14201	14999	+	58.5228	798	Intergenic	Intergenic	-4490	LOC115702294	LOC115702294	XM_030629742	#N/A	protein_coding	NA	NA	NA	NA	NA	NA
0.0007465980376549356-3	NC_044378.1	47732801	47733999	+	58.5228	1198	Intergenic	Intergenic	-122447	LOC115698399	LOC115698399	XR_004008148	small nucleolar RNA R71	snoRNA	NA	NA	NA	NA	NA	NA
1.0328731200665905e-08	NC_044373.1	52011201	52014799	+	58.5035	3598	Intergenic	Intergenic	17843	LOC115715520	LOC115715520	XR_004011387	small nucleolar RNA R71	snoRNA	NA	NA	NA	NA	NA	NA
1.208323150144899e-07	NC_044370.1	33683201	33685799	+	58.5	2598	Intergenic	Intergenic	7567	LOC115719913	LOC115719913	XM_030649088	uncharacterized LOC115719913	protein_coding	0	1	NA	-4.133817641	0.425659848	1
1.7367542211358265e-05-2	NC_044373.1	82242201	82243599	+	58.4869	1398	Intergenic	Intergenic	9935	LOC115712489	LOC115712489	XM_030640768	L-ascorbate oxidase homolog	protein_coding	2.070404694	NA	NA	-0.82350699	NA	NA
1.7367542211358265e-05	NC_044371.1	74862401	74863599	+	58.4869	1198	Intergenic	Intergenic	-9425	LOC115705700	LOC115705700	XM_030633104	calcium-dependent mitochondrial ATP-magnesium/phosphate carrier protein 2,	protein_coding	0.099556466	1	1	-0.202680421	1	1
0.00021742120034134825	NC_044371.1	11422001	11423399	+	58.4725	1398	Intergenic	Intergenic	-6046	LOC115703760	LOC115703760	XM_030630994	uncharacterized LOC115703760	protein_coding	NA	NA	NA	NA	NA	NA
2.6422509922438795e-11	NC_044377.1	43823201	43827199	+	58.4669	3998	Intergenic	Intergenic	-278832	LOC115695668	LOC115695668	XM_030622727	uncharacterized protein At1g66480	protein_coding	-0.071708717	1	1	-3.239340754	1.77E-07	3.64E-06
1.1348626094459602e-08	NC_044375.1	66890001	66893399	+	58.4647	3398	Intergenic	Intergenic	-4866	LOC115721526	LOC115721526	XR_004012542	small nucleolar RNA R71	snoRNA	NA	NA	NA	NA	NA	NA
1.3282940778935977e-07	NW_022060329.1	173401	175999	+	58.4541	2598	Intergenic	Intergenic	-9808	LOC115701979	LOC115701979	XR_004008776	#N/A	lncRNA	NA	NA	NA	NA	NA	NA
1.5772184057058428e-06	NC_044374.1	69975401	69977399	+	58.4387	1998	Intergenic	Intergenic	32692	LOC115717306	LOC115717306	XM_030646276	tubulin beta-2 chain	protein_coding	-0.408976482	1	1	-0.569490329	1	1
6.416889565247538e-05	NC_044378.1	55963401	55964599	+	58.4387	1198	Intergenic	Intergenic	-28520	LOC115696663	LOC115696663	XM_030623553	uncharacterized LOC115696663	protein_coding	NA	NA	NA	NA	NA	NA
6.416889565247538e-05-2	NW_022060451.1	87401	88799	+	58.4387	1398	NA	NA	NA	NA			#N/A		NA	NA	NA	NA	NA	NA
1.9125501761412686e-05	NC_044373.1	19876801	19878199	+	58.4143	1398	Intergenic	Intergenic	-31611	LOC115715363	LOC115715363	XR_004011239	small nucleolar RNA R71	snoRNA	NA	NA	NA	NA	NA	NA
0.0008248467522753916-3	NC_044378.1	38309201	38309999	+	58.396	798	Intergenic	Intergenic	5717	LOC115698038	LOC115698038	XM_030625221	uncharacterized LOC115698038,	protein_coding	0.389085788	1	1	0.158284562	1	1
0.0008248467522753916	NC_044374.1	16368201	16369199	+	58.396	998	Intergenic	Intergenic	-40514	LOC115718324	LOC115718324	XR_004011903	small nucleolar RNA R71	snoRNA	NA	NA	NA	NA	NA	NA
0.0008248467522753916-2	NC_044377.1	17070001	17070799	+	58.396	798	Intergenic	Intergenic	-32277	LOC115695016	LOC115695016	XM_030622115	uncharacterized LOC115695016	protein_coding	NA	NA	NA	NA	NA	NA
1.1288462811649761e-10	NC_044377.1	61801001	61804599	+	58.3884	3598	intron	-intron (LOC115695333, intron 3 of 3)	1478	LOC115695333	LOC115695333	XM_030622406	uncharacterized LOC115695333	protein_coding	NA	NA	NA	NA	NA	NA
1.3700525407231223e-08	NC_044379.1	45401001	45403999	+	58.3861	2998	Intergenic	Intergenic	-54481	LOC115698951	LOC115698951	XM_030626160	protein no-on-transient A	protein_coding	-0.237901854	1	1	0.147487465	1	1
1.7350443670340234e-06	NC_044377.1	25479001	25480799	+	58.3817	1798	Intergenic	Intergenic	17883	LOC115724924	LOC115724924	XR_004013312	uncharacterized LOC115724924	lncRNA	NA	NA	NA	NA	NA	NA
0.00023986192560302753-2	NC_044377.1	21726601	21727599	+	58.3702	998	Intergenic	Intergenic	-15863	LOC115695725	LOC115695725	XM_030622796	uncharacterized LOC115695725	protein_coding	-0.32853201	1	1	-0.639993466	1	1
0.00023986192560302753	NC_044375.1	70014401	70015799	+	58.3702	1398	Intergenic	Intergenic	-11051	LOC115720599	LOC115720599	XM_030649747	protein DJ-1 homolog D	protein_coding	-0.609806618	1	1	-0.189028904	1	1
4.0080515929372655e-10	NC_044372.1	11868401	11872399	+	58.3637	3998	Intergenic	Intergenic	7515	LOC115710432	LOC115710432	XM_030638795	uncharacterized LOC115710432	protein_coding	NA	NA	NA	NA	NA	NA
2.1061898229536584e-05-2	NC_044376.1	17553601	17555199	+	58.3405	1598	Intergenic	Intergenic	19740	LOC115721871	LOC115721871	XM_030650961	putative glutamine amidotransferase GAT1_2.1	protein_coding	1.193982426	0.721626304	1	5.190212228	3.62E-09	9.01E-08
2.1061898229536584e-05	NC_044370.1	58322401	58323999	+	58.3405	1598	Intergenic	Intergenic	-6207	LOC115722422	LOC115722422	XM_030651626	uncharacterized LOC115722422	protein_coding	NA	NA	NA	NA	NA	NA
4.627079235783746e-11	NC_044374.1	16345601	16349399	+	58.2947	3798	Intergenic	Intergenic	-19314	LOC115718324	LOC115718324	XR_004011903	small nucleolar RNA R71	snoRNA	NA	NA	NA	NA	NA	NA
7.794199516129147e-05	NC_044370.1	41900401	41902399	+	58.2654	1998	Intergenic	Intergenic	7245	LOC115702469	LOC115702469	XR_004008887	uncharacterized LOC115702469	lncRNA	0.410947537	1	NA	0.998328082	1	NA
0.0002646336534123688-3	NC_044372.1	69092801	69094399	+	58.2654	1598	Intergenic	Intergenic	-9109	LOC115711613	LOC115711613	XM_030639986	pentatricopeptide repeat-containing protein At5g02830, chloroplastic,	protein_coding	-1.863283175	1.25E-06	2.93E-05	0.965981639	1	1
7.794199516129147e-05-2	NC_044374.1	30908401	30909599	+	58.2654	1198	intron	-intron (LOC115717702, intron 2 of 6)	21012	LOC115717702	LOC115717702	XM_030646682	uncharacterized LOC115717702	protein_coding	0.410947537	1	NA	0.998328082	1	NA
0.0032048617658589043	NC_044370.1	47786401	47786999	+	58.2654	598	Intergenic	Intergenic	5740	LOC115711376	LOC115711376	XM_030639713	receptor-like protein 44	protein_coding	-0.599884041	1	1	-0.129089197	1	1
2.3194900353319208e-05	NC_044370.1	85693401	85695199	+	58.2654	1798	Intergenic	Intergenic	-51569	LOC115725385	LOC115725385	XM_030654898	transport inhibitor response 1-like protein,	protein_coding	0.187859263	1	1	-0.129756657	1	1
0.0002646336534123688-2	NC_044372.1	19903001	19903999	+	58.2654	998	Intergenic	Intergenic	4727	LOC115710515	LOC115710515	XM_030638879	uncharacterized LOC115710515	protein_coding	NA	NA	NA	NA	NA	NA
0.0002646336534123688	NC_044370.1	86363801	86364999	+	58.2654	1198	Intergenic	Intergenic	-25416	LOC115725684	LOC115725684	XM_030655275	uncharacterized LOC115725684	protein_coding	NA	NA	NA	NA	NA	NA
7.794199516129147e-05-3	NW_022060485.1	76001	77199	+	58.2654	1198	exon	-exon (LOC115702201, exon 1 of 2)	117	LOC115702201	LOC115702201	XM_030629650	#N/A	protein_coding	NA	NA	NA	NA	NA	NA
0.0002646336534123688-4	NC_044374.1	69932601	69933799	+	58.2654	1198	Intergenic	Intergenic	-4044	LOC115717023	LOC115717023	XM_030645954	uncharacterized LOC115717023	protein_coding	NA	NA	NA	NA	NA	NA
0.0009113801733966765	NC_044373.1	29330401	29331399	+	58.2654	998	Intergenic	Intergenic	-5041	LOC115713033	LOC115713033	XM_030641505	mitochondrial import inner membrane translocase subunit PAM16 like 2-like	protein_coding	-0.826181107	1	1	-0.399954024	1	1
1.939801946428253e-07	NC_044378.1	48041401	48043599	+	58.2654	2198	Intergenic	Intergenic	-54932	LOC115696614	LOC115696614	XM_030623509	uncharacterized LOC115696614	protein_coding	NA	NA	NA	NA	NA	NA
2.3194900353319208e-05-2	NC_044372.1	43996001	43997599	+	58.2654	1598	Intergenic	Intergenic	-5110	LOC115711224	LOC115711224	XM_030639552	uncharacterized LOC115711224,	protein_coding	0.429262275	1	NA	0.023527426	1	NA
1.3370551347660972e-23	NC_044378.1	48205801	48216399	+	58.253	10598	Intergenic	Intergenic	76394	LOC115696946	LOC115696946	XR_004007835	uncharacterized LOC115696946, 1	lncRNA	-0.625387096	1	1	-0.189194205	1	1
1.88922257543894e-09	NC_044370.1	70486601	70489999	+	58.2299	3398	Intergenic	Intergenic	-4246	LOC115723794	LOC115723794	XM_030653266	uncharacterized LOC115723794	protein_coding	0.410947537	1	NA	0.998328082	1	NA
7.003671881817806e-07	NC_044371.1	24527001	24529599	+	58.212	2598	Intergenic	Intergenic	-2524	LOC115704879	LOC115704879	XM_030632091	rop guanine nucleotide exchange factor 12	protein_coding	7.788002625	9.43E-12	4.80E-10	6.334278927	5.77E-15	2.54E-13
7.6572764467067e-06	NC_044371.1	11894001	11895999	+	58.1986	1998	Intergenic	Intergenic	-24190	LOC115706853	LOC115706853	XM_030634610	serine/threonine-protein kinase TOR-like	protein_coding	0.064869472	1	1	-0.544028343	1	1
7.6572764467067e-06-2	NC_044375.1	28118601	28120199	+	58.1986	1598	exon	-exon (LOC115719998, exon 3 of 3)	681	LOC115719998	LOC115719998	XM_030649167	uncharacterized LOC115719998	protein_coding	0	1	NA	-0.925217262	1	NA
1.9444358682817382e-13	NC_044378.1	14123201	14129199	+	58.1956	5998	Intergenic	Intergenic	14223	LOC115696363	LOC115696363	XM_030623264	uncharacterized LOC115696363	protein_coding	NA	NA	NA	NA	NA	NA
2.5544533454925556e-05	NW_022060476.1	918001	919799	+	58.1889	1798	Intergenic	Intergenic	187100	LOC115702188	LOC115702188	XM_030629636	#N/A	protein_coding	NA	NA	NA	NA	NA	NA
6.7395543655496634e-09	NC_044377.1	22277201	22280199	+	58.1889	2998	Intergenic	Intergenic	-30576	LOC115725654	LOC115725654	XM_030655239	DNA replication licensing factor MCM5	protein_coding	2.223664959	0.125657697	0.631990795	-1.818599027	0.290484499	1
8.590504904164408e-05	NC_044376.1	55172601	55173599	+	58.1761	998	Intergenic	Intergenic	-4950	LOC115723925	LOC115723925	XM_030653386	uncharacterized LOC115723925	protein_coding	NA	NA	NA	NA	NA	NA
8.590504904164408e-05-2	NC_044378.1	6725001	6725999	+	58.1761	998	Intergenic	Intergenic	-6871	LOC115697098	LOC115697098	XM_030624004	L-type lectin-domain containing receptor kinase IV.2	protein_coding	-1.817882262	0.507332773	1	-4.313099602	0.005843611	0.052143811
7.70177536932099e-07	NC_044378.1	19169801	19171599	+	58.158	1798	Intergenic	Intergenic	55254	LOC115696416	LOC115696416	XM_030623318	uncharacterized mitochondrial protein AtMg00240-like	protein_coding	NA	NA	NA	NA	NA	NA
8.427977907864107e-06-3	NC_044374.1	48365601	48366599	+	58.1307	998	Intergenic	Intergenic	9872	LOC115717804	LOC115717804	XM_030646777	uncharacterized LOC115717804	protein_coding	NA	NA	NA	NA	NA	NA
7.719487742212858e-10	NC_044377.1	18363601	18365799	+	58.1307	2198	Intergenic	Intergenic	-50258	LOC115724970	LOC115724970	XM_030654357	putative DUF21 domain-containing protein At3g13070, chloroplastic,	protein_coding	-0.539079078	1	1	0.116713641	1	1
0.001007086725053991-3	NC_044377.1	74176201	74177199	+	58.1307	998	Intergenic	Intergenic	5790	LOC115696114	LOC115696114	XR_004007709	U6 spliceosomal RNA	snRNA	NA	NA	NA	NA	NA	NA
0.001007086725053991-2	NC_044377.1	67352201	67352999	+	58.1307	798	Intergenic	Intergenic	-45336	LOC115694843	LOC115694843	XR_004007493	uncharacterized LOC115694843	lncRNA	5.779346791	0.000139793	0.002096135	0.653579396	1	1
8.427977907864107e-06-2	NC_044371.1	16473401	16475599	+	58.1307	2198	exon	-exon (LOC115703840, exon 2 of 3)	1183	LOC115703840	LOC115703840	XM_030631071	uncharacterized LOC115703840	protein_coding	1.35452739	0.888438723	NA	-0.90607383	1	NA
8.427977907864107e-06	NC_044370.1	67840801	67842599	+	58.1307	1798	Intergenic	Intergenic	8356	LOC115713645	LOC115713645	XR_004011003	uncharacterized LOC115713645,	lncRNA	NA	NA	NA	NA	NA	NA
8.427977907864107e-06-4	NC_044377.1	58290001	58291599	+	58.1307	1598	Intergenic	Intergenic	-102420	LOC115724685	LOC115724685	XM_030654024	vicianin hydrolase	protein_coding	6.077698009	7.34E-05	0.001179213	2.629489952	0.007425385	0.064216011
0.001007086725053991	NC_044374.1	72756401	72757199	+	58.1307	798	Intergenic	Intergenic	-15771	LOC115716132	LOC115716132	XM_030644865	2,3-dimethylmalate lyase,	protein_coding	0.076389897	1	1	-0.080929313	1	1
2.5031076039848753e-09	NC_044379.1	169001	172599	+	58.1216	3598	Intergenic	Intergenic	140044	LOC115700627	LOC115700627	XM_030628235	protein sym-1	protein_coding	-0.181563454	1	1	-0.164646111	1	1
2.57705803237318e-07	NC_044379.1	13385401	13387599	+	58.1183	2198	Intergenic	Intergenic	9210	LOC115699613	LOC115699613	XM_030627104	NDR1/HIN1-like protein 1	protein_coding	1.052900291	0.755170827	1	-0.208939631	1	1
2.8132869930732733e-05	NC_044374.1	46074001	46075399	+	58.1111	1398	Intergenic	Intergenic	-19054	LOC115715831	LOC115715831	XM_030644498	glutamine synthetase nodule isozyme	protein_coding	0.043871536	1	1	-0.661503186	1	1
3.0669187285173404e-17	NC_044378.1	48372201	48379199	+	58.1086	6998	Intergenic	Intergenic	-49897	LOC115696615	LOC115696615	XM_030623510	uncharacterized LOC115696615	protein_coding	NA	NA	NA	NA	NA	NA
0.0035497434686673894-3	NC_044374.1	8070401	8070999	+	58.0849	598	Intergenic	Intergenic	10855	LOC115717000	LOC115717000	XM_030645923	glutaminyl-peptide cyclotransferase,	protein_coding	0.144451893	1	1	0.004658526	1	1
9.468518034393944e-05	NW_022060340.1	199001	199999	+	58.0849	998	exon	-exon (LOC115701996, exon 1 of 3)	190	LOC115701996	LOC115701996	XM_030629463	#N/A	protein_coding	0	1	NA	-2.099682037	0.784224685	NA
0.0035497434686673894-2	NC_044373.1	91901601	91902199	+	58.0849	598	Intergenic	Intergenic	43523	LOC115713915	LOC115713915	XM_030642394	THO complex subunit 1-like	protein_coding	-0.227102173	1	1	0.121071833	1	1
0.0035497434686673894-5	NC_044378.1	66757201	66757799	+	58.0849	598	Intergenic	Intergenic	5688	LOC115698116	LOC115698116	XM_030625290	1-acylglycerol-3-phosphate O-acyltransferase	protein_coding	-0.633987188	1	1	-0.132771542	1	1
0.0035497434686673894	NC_044371.1	45204801	45205399	+	58.0849	598	Intergenic	Intergenic	-4665	LOC115704758	LOC115704758	XM_030631964	uncharacterized LOC115704758	protein_coding	-0.27613802	NA	NA	1.062064473	NA	NA
8.648963912902569e-08	NC_044370.1	61167801	61170199	+	58.0849	2398	Intergenic	Intergenic	-150027	LOC115703384	LOC115703384	XR_004009152	U6 spliceosomal RNA	snRNA	NA	NA	NA	NA	NA	NA
0.0035497434686673894-4	NC_044375.1	64775401	64775999	+	58.0849	598	Intergenic	Intergenic	-28046	LOC115718474	LOC115718474	XM_030647260	uncharacterized LOC115718474,	protein_coding	0.02199611	1	1	2.408291965	4.54E-05	0.000644355
2.7492269458434024e-09	NC_044375.1	25116401	25119799	+	58.0849	3398	Intergenic	Intergenic	-31205	LOC115719970	LOC115719970	XM_030649139	uncharacterized LOC115719970	protein_coding	NA	NA	NA	NA	NA	NA
3.025097274030976e-11	NC_044377.1	250401	254199	+	58.0655	3798	Intergenic	Intergenic	2568	LOC115725728	LOC115725728	XR_004013446	uncharacterized LOC115725728	lncRNA	-0.127567208	1	1	0.862975059	1	1
9.27640216378423e-06	NC_044371.1	36257801	36259399	+	58.0618	1598	Intergenic	Intergenic	6080	LOC115706872	LOC115706872	XM_030634630	disease resistance protein RLM3	protein_coding	1.073032741	0.778076201	1	1.740681413	0.00434101	0.039970664
9.27640216378423e-06-2	NC_044375.1	43896801	43898599	+	58.0618	1798	Intergenic	Intergenic	102705	LOC115721317	LOC115721317	XM_030650591	tropomyosin-2-like	protein_coding	0.234417585	1	1	-1.706036753	0.502563852	1
0.00032217190135793914	NC_044372.1	34702401	34703199	+	58.0479	798	Intergenic	Intergenic	28410	LOC115708691	LOC115708691	XR_004010062	uncharacterized LOC115708691,	lncRNA	-1.125349225	0.678883674	1	-1.186069133	0.530234162	1
0.00032217190135793914-2	NC_044373.1	19401	20399	+	58.0479	998	Intergenic	Intergenic	13482	LOC115712527	LOC115712527	XM_030640816	probable WRKY transcription factor 40	protein_coding	-1.470646303	NA	NA	4.765821344	NA	NA
0.00032217190135793914-3	NC_044377.1	21587801	21588799	+	58.0479	998	intron	-intron (LOC115695042, intron 1 of 2)	9537	LOC115695042	LOC115695042	XM_030622140	homeobox protein 9	protein_coding	-1.296808301	0.179840231	0.831225959	0.005168815	1	1
3.098423937664597e-05	NC_044375.1	48561601	48562999	+	58.032	1398	Intergenic	Intergenic	13159	LOC115718969	LOC115718969	XM_030647802	F-box protein At1g78280	protein_coding	0.255469805	1	1	-0.148746329	1	1
3.0755325555097432e-06	NC_044378.1	4201801	4203599	+	58.0231	1798	Intergenic	Intergenic	-11207	LOC115696260	LOC115696260	XM_030623170	putative small ubiquitin-related modifier 8	protein_coding	NA	NA	NA	NA	NA	NA
3.1144254196780735e-07	NC_044378.1	25481001	25483999	+	58.0174	2998	Intergenic	Intergenic	-50726	LOC115696452	LOC115696452	XM_030623353	uncharacterized LOC115696452	protein_coding	NA	NA	NA	NA	NA	NA
1.0210404227266918e-05	NC_044370.1	76734001	76735999	+	57.9919	1998	promoter-TSS	-promoter-TSS (LOC115703331)	-962	LOC115703331	LOC115703331	XR_004009105	small nucleolar RNA R71	snoRNA	NA	NA	NA	NA	NA	NA
0.00010436665230199601	NC_044374.1	23394001	23395799	+	57.9919	1798	Intergenic	Intergenic	19518	LOC115717659	LOC115717659	XM_030646641	L10-interacting MYB domain-containing protein-like	protein_coding	NA	NA	NA	NA	NA	NA
1.0446593235723716e-07	NC_044370.1	70012001	70014399	+	57.9919	2398	Intergenic	Intergenic	51802	LOC115713762	LOC115713762	XM_030642245	probable serine/threonine-protein kinase PBL21	protein_coding	0.59537565	1	1	0.525693922	1	1
0.0011129516655277276	NC_044370.1	88666001	88666799	+	57.9919	798	Intergenic	Intergenic	-52665	LOC115697154	LOC115697154	XM_030624063	WAT1-related protein At4g08300	protein_coding	-0.714564139	1	1	-3.316083638	5.74E-05	0.000798689
0.00010436665230199601-4	NC_044379.1	32921001	32922599	+	57.9919	1598	Intergenic	Intergenic	-7376	LOC115700025	LOC115700025	XM_030627575	uncharacterized LOC115700025	protein_coding	0.410947537	1	NA	0.036563417	1	NA
0.00010436665230199601-3	NC_044375.1	67539001	67539799	+	57.9919	798	Intergenic	Intergenic	32407	LOC115719535	LOC115719535	XM_030648617	protein METHYLENE BLUE SENSITIVITY 1	protein_coding	0.119796076	1	1	-0.164121862	1	1
1.122615284144905e-09	NC_044373.1	4587401	4591199	+	57.9919	3798	promoter-TSS	-promoter-TSS (LOC115715499)	-472	LOC115715499	LOC115715499	XR_004011368	small nucleolar RNA R71	snoRNA	NA	NA	NA	NA	NA	NA
1.0210404227266918e-05-2	NC_044372.1	67617601	67619399	+	57.9919	1798	Intergenic	Intergenic	51118	LOC115710880	LOC115710880	XM_030639233	uncharacterized LOC115710880	protein_coding	NA	NA	NA	NA	NA	NA
1.0446593235723716e-07-2	NC_044375.1	96337001	96339599	+	57.9919	2598	Intergenic	Intergenic	32806	LOC115719675	LOC115719675	XM_030648805	pre-rRNA-processing protein TSR2 homolog,	protein_coding	-0.484977883	1	1	-0.279677658	1	1
0.00010436665230199601-2	NC_044375.1	51444601	51446199	+	57.9919	1598	Intergenic	Intergenic	114662	LOC115719674	LOC115719674	XM_030648804	DNA ligase 1	protein_coding	-0.568079845	1	1	-0.189180318	1	1
3.4237933808974304e-07	NW_022060454.1	1430201	1432599	+	57.9662	2398	Intergenic	Intergenic	-70792	LOC115702125	LOC115702125	XM_030629583	#N/A	protein_coding	2.642988593	0.003486277	0.033308503	3.285318001	4.97E-05	0.000699547
1.1481044035845333e-07	NC_044373.1	37191801	37193799	+	57.9446	1998	Intergenic	Intergenic	-4334	LOC115713372	LOC115713372	XM_030641853	uncharacterized LOC115713372	protein_coding	NA	NA	NA	NA	NA	NA
1.1263710145435222e-06-2	NC_044376.1	12432001	12433999	+	57.9351	1998	Intergenic	Intergenic	-14698	LOC115723288	LOC115723288	XM_030652728	sphingoid long-chain bases kinase 1,	protein_coding	0.08505685	1	1	0.037065568	1	1
0.00035550652435444274-3	NC_044379.1	7960401	7961599	+	57.9351	1198	Intergenic	Intergenic	14417	LOC115701099	LOC115701099	XR_004008503	uncharacterized LOC115701099	lncRNA	-0.160491415	1	NA	2.904665111	0.515368459	1
0.00035550652435444274-2	NC_044371.1	14435001	14435999	+	57.9351	998	Intergenic	Intergenic	10470	LOC115708077	LOC115708077	XM_030636254	probable zinc metalloprotease EGY2, chloroplastic	protein_coding	-1.30664755	0.434711195	1	1.909039289	0.037780428	0.260627892
0.00035550652435444274	NC_044370.1	91851001	91851999	+	57.9351	998	promoter-TSS	-promoter-TSS (LOC115702955)	-1574	LOC115702955	LOC115702955	XM_030630432	uncharacterized LOC115702955	protein_coding	3.599887975	0.002323472	0.023782799	2.179440833	0.067897688	0.422901847
1.1263710145435222e-06	NC_044374.1	20232201	20234199	+	57.9351	1998	Intergenic	Intergenic	-5759	LOC115717631	LOC115717631	XM_030646615	uncharacterized LOC115717631	protein_coding	NA	NA	NA	NA	NA	NA
3.8603818497393166e-08	NC_044373.1	12090801	12094799	+	57.9263	3998	Intergenic	Intergenic	133284	LOC115714256	LOC115714256	XM_030642886	glutaredoxin-C4,	protein_coding	0.757014487	1	1	-0.726336606	1	1
1.1238634859393849e-05	NC_044370.1	54453201	54455199	+	57.9208	1998	Intergenic	Intergenic	-6859	LOC115712195	LOC115712195	XM_030640449	ethylene-responsive transcription factor RAP2-1	protein_coding	0.944761586	1	1	-0.252839291	1	1
0.00011504246977385296-2	NC_044377.1	51742401	51743599	+	57.8969	1198	Intergenic	Intergenic	-9056	LOC115695696	LOC115695696	XR_004007530	uncharacterized LOC115695696,	lncRNA	0	1	NA	-0.925217262	1	NA
0.00011504246977385296	NC_044372.1	20262001	20262999	+	57.8969	998	Intergenic	Intergenic	-7716	LOC115710522	LOC115710522	XM_030638885	uncharacterized LOC115710522	protein_coding	NA	NA	NA	NA	NA	NA
3.7224427075163442e-06	NC_044378.1	19165001	19166799	+	57.8969	1798	Intergenic	Intergenic	50454	LOC115696416	LOC115696416	XM_030623318	uncharacterized mitochondrial protein AtMg00240-like	protein_coding	NA	NA	NA	NA	NA	NA
1.2386875053041905e-06	NC_044375.1	44967801	44970399	+	57.8776	2598	Intergenic	Intergenic	-136526	LOC115721173	LOC115721173	XM_030650426	NADPH-dependent aldehyde reductase 1, chloroplastic-like	protein_coding	7.206904317	0.000258441	0.003625484	7.794300258	6.35E-05	0.000870983
2.22116539408837e-13	NC_044370.1	20747601	20752399	+	57.8728	4798	Intergenic	Intergenic	-7016	LOC115717929	LOC115717929	XM_030646898	uncharacterized LOC115717929	protein_coding	2.318046374	0.52383738	NA	2.905451475	0.356773428	1
1.2370621392674743e-05-2	NC_044375.1	42335201	42336799	+	57.8486	1598	Intergenic	Intergenic	-41518	LOC115721059	LOC115721059	XR_004012368	uncharacterized LOC115721059	lncRNA	0.410949701	1	1	-4.155914448	0.151423318	0.817344434
0.0012300678657763727-3	NC_044378.1	40873801	40874599	+	57.8486	798	Intergenic	Intergenic	32948	LOC115696567	LOC115696567	XM_030623461	probable aspartyl protease At4g16563	protein_coding	NA	NA	NA	NA	NA	NA
0.0012300678657763727-2	NC_044377.1	22993201	22993799	+	57.8486	598	Intergenic	Intergenic	-57561	LOC115695057	LOC115695057	XM_030622155	uncharacterized LOC115695057	protein_coding	-1.512629836	0.90002605	NA	0	1	NA
0.0012300678657763727	NC_044377.1	2483801	2484599	+	57.8486	798	Intergenic	Intergenic	6658	LOC115724743	LOC115724743	XM_030654081	receptor-like protein 7	protein_coding	-0.78539528	1	1	0.293537396	1	1
1.2370621392674743e-05	NC_044371.1	9938801	9939599	+	57.8486	798	Intergenic	Intergenic	8713	LOC115708139	LOC115708139	XM_030636338	protein NRT1/ PTR FAMILY 5.6	protein_coding	1.396221289	0.32816747	1	-0.432979593	1	1
3.921751545514936e-16	NC_044374.1	77548401	77552999	+	57.8194	4598	promoter-TSS	-promoter-TSS (LOC115718006)	-658	LOC115718006	LOC115718006	XM_030646974	uncharacterized LOC115718006	protein_coding	0.410947537	1	NA	0.998328082	1	NA
0.00039231416617702917-3	NC_044377.1	70813201	70814199	+	57.8194	998	promoter-TSS	-promoter-TSS (LOC115696070)	-867	LOC115696070	LOC115696070	XR_004007668	small nucleolar RNA R71	snoRNA	NA	NA	NA	NA	NA	NA
0.00039231416617702917-2	NC_044376.1	12254801	12255599	+	57.8194	798	Intergenic	Intergenic	-5383	LOC115722870	LOC115722870	XM_030652216	AP-5 complex subunit mu	protein_coding	0.044937634	1	1	-0.25854221	1	1
0.00039231416617702917	NC_044370.1	59507601	59508799	+	57.8194	1198	Intergenic	Intergenic	-48394	LOC115703347	LOC115703347	XR_004009119	small nucleolar RNA R71	snoRNA	NA	NA	NA	NA	NA	NA
4.548909395155469e-07-2	NC_044375.1	33698401	33700599	+	57.8087	2198	Intergenic	Intergenic	-14421	LOC115720665	LOC115720665	XM_030649828	germin-like protein subfamily 1 member 17	protein_coding	NA	NA	NA	NA	NA	NA
4.548909395155469e-07	NC_044373.1	15637801	15641199	+	57.8087	3398	Intergenic	Intergenic	43978	LOC115713199	LOC115713199	XM_030641682	uncharacterized LOC115713199	protein_coding	NA	NA	NA	NA	NA	NA
0.00012681529251920372-6	NW_022060487.1	767401	768599	+	57.7998	1198	NA	NA	NA	NA			#N/A		NA	NA	NA	NA	NA	NA
0.00012681529251920372-3	NC_044378.1	25964001	25964999	+	57.7998	998	Intergenic	Intergenic	-17599	LOC115698060	LOC115698060	XR_004008030	inactive tetrahydrocannabinolic acid synthase-like	transcribed_pseudogene	2.318231538	0.740009026	NA	2.905596205	0.63143503	NA
0.00012681529251920372-2	NC_044375.1	49070401	49071799	+	57.7998	1398	Intergenic	Intergenic	-3892	LOC115720279	LOC115720279	XR_004012265	uncharacterized LOC115720279,	lncRNA	NA	NA	NA	NA	NA	NA
0.00012681529251920372-4	NC_044378.1	27027001	27028799	+	57.7998	1798	Intergenic	Intergenic	-30022	LOC115697710	LOC115697710	XM_030624808	squamosa promoter-binding-like protein 3	protein_coding	-0.004305419	1	1	-0.857528705	1	1
0.00012681529251920372-5	NC_044379.1	46806801	46808399	+	57.7998	1598	Intergenic	Intergenic	15106	LOC115698829	LOC115698829	XM_030626024	probable ribonuclease P/MRP protein subunit POP5	protein_coding	0.188799033	1	1	-0.019664864	1	1
1.524076956933063e-07	NC_044379.1	41553001	41555999	+	57.7998	2998	Intergenic	Intergenic	-11883	LOC115700445	LOC115700445	XM_030627983	major latex allergen Hev b 5	protein_coding	2.237806733	0.060847946	0.357678438	-3.994688627	5.44E-06	8.95E-05
0.00012681529251920372	NC_044370.1	60965601	60967399	+	57.7998	1798	Intergenic	Intergenic	3082	LOC115722865	LOC115722865	XM_030652209	uncharacterized LOC115722865	protein_coding	NA	NA	NA	NA	NA	NA
4.139873710268054e-05	NC_044370.1	67716001	67717399	+	57.7858	1398	Intergenic	Intergenic	16806	LOC115723629	LOC115723629	XM_030653116	uncharacterized mitochondrial protein AtMg00310-like	protein_coding	NA	NA	NA	NA	NA	NA
1.361685678668233e-05-2	NC_044376.1	54276201	54277999	+	57.7752	1798	Intergenic	Intergenic	-46333	LOC115722911	LOC115722911	XM_030652281	probable fructokinase-6, chloroplastic,	protein_coding	-0.582015798	1	1	-0.213041698	1	1
1.361685678668233e-05	NC_044372.1	19675001	19676799	+	57.7752	1798	Intergenic	Intergenic	23170	LOC115710512	LOC115710512	XM_030638876	uncharacterized mitochondrial protein AtMg00860-like	protein_coding	NA	NA	NA	NA	NA	NA
4.5056246509864494e-06	NC_044373.1	75887601	75889999	+	57.767	2398	Intergenic	Intergenic	-15964	LOC115715166	LOC115715166	XM_030643987	uncharacterized protein At2g29880-like	protein_coding	NA	NA	NA	NA	NA	NA
1.4980680774921594e-06	NC_044370.1	24691801	24693999	+	57.7604	2198	Intergenic	Intergenic	-35383	LOC115719049	LOC115719049	XM_030647938	uncharacterized LOC115719049	protein_coding	NA	NA	NA	NA	NA	NA
5.00085361739096e-07	NC_044377.1	54380401	54382199	+	57.755	1798	Intergenic	Intergenic	7791	LOC115725265	LOC115725265	XM_030654721	glycosyltransferase BC10,	protein_coding	-0.507842453	1	1	-0.259040957	1	1
1.6750090464123857e-07	NC_044370.1	16663601	16666599	+	57.7505	2998	Intergenic	Intergenic	-42447	LOC115704772	LOC115704772	XM_030631980	E3 ubiquitin-protein ligase UPL3	protein_coding	0.046697579	1	1	-0.09732974	1	1
0.00013979844469529717	NC_044371.1	94731601	94732399	+	57.7007	798	Intergenic	Intergenic	-4706	LOC115707618	LOC115707618	XM_030635631	anoctamin-like protein At1g73020	protein_coding	0.458459841	1	1	-0.588745773	1	1
0.0013596478208533862	NC_044371.1	51863801	51864799	+	57.7007	998	promoter-TSS	-promoter-TSS (LOC115705418)	3	LOC115705418	LOC115705418	XR_004009460	uncharacterized LOC115705418	lncRNA	NA	NA	NA	NA	NA	NA
0.0013596478208533862-2	NC_044379.1	50709201	50709999	+	57.7007	798	Intergenic	Intergenic	-4412	LOC115698819	LOC115698819	XM_030626005	mitotic checkpoint serine/threonine-protein kinase BUB1	protein_coding	2.901165002	0.00460212	0.042409661	1.523243783	0.356744154	1
0.0004329597184959194-3	NC_044374.1	33543401	33544399	+	57.7007	998	Intergenic	Intergenic	-9491	LOC115716862	LOC115716862	XM_030645766	TVP38/TMEM64 family membrane protein slr0305	protein_coding	-1.308017396	0.201363788	0.904185026	0.70843417	1	1
0.0043571838679938605	NC_044375.1	35564801	35565399	+	57.7007	598	Intergenic	Intergenic	-44331	LOC115721457	LOC115721457	XR_004012479	small nucleolar RNA R71	snoRNA	NA	NA	NA	NA	NA	NA
0.0004329597184959194-4	NC_044379.1	21806001	21806999	+	57.7007	998	Intergenic	Intergenic	16266	LOC115699185	LOC115699185	XM_030626465	uncharacterized LOC115699185,	protein_coding	-0.401058787	1	1	-0.265106385	1	1
0.00013979844469529717-2	NC_044377.1	71695601	71696799	+	57.7007	1198	promoter-TSS	-promoter-TSS (LOC115696162)	-1950	LOC115696162	LOC115696162	XR_004007754	small nucleolar RNA R71	snoRNA	NA	NA	NA	NA	NA	NA
1.498889775731274e-05	NC_044378.1	55528801	55530599	+	57.7007	1798	Intergenic	Intergenic	-38854	LOC115697759	LOC115697759	XM_030624882	rop guanine nucleotide exchange factor 14,	protein_coding	-0.474652728	1	1	2.329050113	2.36E-21	1.82E-19
0.0004329597184959194-2	NC_044373.1	54047801	54049199	+	57.7007	1398	Intergenic	Intergenic	-6065	LOC115712727	LOC115712727	XM_030641071	hydroxyproline O-galactosyltransferase GALT4,	protein_coding	0.469800373	1	1	-0.339202021	1	1
4.559931112749603e-05-2	NC_044376.1	10812601	10813599	+	57.7007	998	Intergenic	Intergenic	-2037	LOC115724315	LOC115724315	XR_004013112	small nucleolar RNA R71	snoRNA	NA	NA	NA	NA	NA	NA
1.6474834610745626e-06	NC_044372.1	62015001	62015999	+	57.7007	998	Intergenic	Intergenic	-50581	LOC115711226	LOC115711226	XR_004010435	uncharacterized LOC115711226,	lncRNA	NA	NA	NA	NA	NA	NA
4.559931112749603e-05	NC_044370.1	76298801	76300199	+	57.7007	1398	Intergenic	Intergenic	-43462	LOC115714749	LOC115714749	XM_030643510	putative receptor protein kinase ZmPK1	protein_coding	-1.596681294	0.417140448	1	-1.165149896	0.821867147	1
0.0004329597184959194	NC_044370.1	52561001	52562199	+	57.7007	1198	Intergenic	Intergenic	9478	LOC115712046	LOC115712046	XM_030640258	probable inactive poly [ADP-ribose] polymerase SRO3,	protein_coding	2.128254646	3.86E-05	0.000669773	1.4891299	0.070735258	0.436593484
1.498889775731274e-05-2	NW_022060460.1	65801	67399	+	57.7007	1598	Intergenic	Intergenic	15739	LOC115702134	LOC115702134	XM_030629592	#N/A	protein_coding	2.593915384	0.206346792	0.919259417	-0.11468676	1	1
6.182125963457762e-08	NC_044378.1	3969601	3973199	+	57.7007	3598	Intergenic	Intergenic	-6886	LOC115697035	LOC115697035	XM_030623931	uncharacterized LOC115697035	protein_coding	0.348634965	1	1	0.095560722	1	1
2.0232064964136856e-07	NC_044374.1	4912401	4914199	+	57.6503	1798	Intergenic	Intergenic	-7231	LOC115718266	LOC115718266	XR_004011849	small nucleolar RNA R71	snoRNA	NA	NA	NA	NA	NA	NA
5.0227428009022564e-05	NC_044370.1	59844801	59845999	+	57.614	1198	Intergenic	Intergenic	18343	LOC115702510	LOC115702510	XR_004008903	uncharacterized LOC115702510	lncRNA	NA	NA	NA	NA	NA	NA
0.0004778468070301145	NC_044370.1	102471201	102472199	+	57.5789	998	Intergenic	Intergenic	-46484	LOC115701007	LOC115701007	XR_004008484	uncharacterized LOC115701007	lncRNA	-0.235672563	1	1	-2.007977573	0.318286562	1
9.303688797179998e-09	NC_044377.1	24840401	24843199	+	57.5789	2798	Intergenic	Intergenic	27452	LOC115695060	LOC115695060	XM_030622157	uncharacterized LOC115695060	protein_coding	NA	NA	NA	NA	NA	NA
6.000427452770826e-06	NC_044370.1	72258001	72259799	+	57.5652	1798	Intergenic	Intergenic	2046	LOC115724309	LOC115724309	XM_030653703	uncharacterized LOC115724309	protein_coding	0.410947537	1	NA	0.998328082	1	NA
6.000427452770826e-06-2	NC_044375.1	51275601	51277599	+	57.5652	1998	Intergenic	Intergenic	59775	LOC115720173	LOC115720173	XM_030649331	uncharacterized LOC115720173	protein_coding	NA	NA	NA	NA	NA	NA
1.1682268272215005e-09	NC_044377.1	43310801	43313999	+	57.5571	3198	Intergenic	Intergenic	-252181	LOC115695201	LOC115695201	XM_030622286	uncharacterized LOC115695201	protein_coding	NA	NA	NA	NA	NA	NA
0.0015030370404849676	NC_044373.1	43532201	43532799	+	57.548	598	Intergenic	Intergenic	286507	LOC115713438	LOC115713438	XM_030641921	uncharacterized LOC115713438	protein_coding	0	1	NA	-0.925217262	1	NA
2.443804859559175e-07	NC_044372.1	45321801	45324599	+	57.548	2798	Intergenic	Intergenic	-16173	LOC115710724	LOC115710724	XM_030639078	uncharacterized LOC115710724	protein_coding	NA	NA	NA	NA	NA	NA
5.532675784530547e-05	NC_044371.1	16114201	16115799	+	57.5257	1598	Intergenic	Intergenic	-15842	LOC115703608	LOC115703608	XM_030630845	uncharacterized LOC115703608	protein_coding	1.795331218	0.471272745	1	-1.459749424	0.542215582	1
5.532675784530547e-05-2	NC_044377.1	43166201	43167599	+	57.5257	1398	Intergenic	Intergenic	-106681	LOC115695201	LOC115695201	XM_030622286	uncharacterized LOC115695201	protein_coding	NA	NA	NA	NA	NA	NA
5.532675784530547e-05-3	NW_022060417.1	541601	542599	+	57.5257	998	Intergenic	Intergenic	5269	LOC115702073	LOC115702073	XR_004008791	#N/A	lncRNA	NA	NA	NA	NA	NA	NA
8.136729049969534e-13	NC_044378.1	10540801	10545399	+	57.522	4598	Intergenic	Intergenic	-26482	LOC115697853	LOC115697853	XM_030625008	uncharacterized LOC115697853	protein_coding	0.256414065	1	1	3.431220024	1.23E-10	3.69E-09
2.1913317649255916e-06	NC_044377.1	70490601	70492599	+	57.5168	1998	Intergenic	Intergenic	4456	LOC115695439	LOC115695439	XM_030622505	uncharacterized LOC115695439	protein_coding	0.410947537	1	NA	0.998328082	1	NA
3.790625677751177e-09	NC_044372.1	33283001	33285999	+	57.509	2998	Intergenic	Intergenic	21895	LOC115710632	LOC115710632	XM_030638989	uncharacterized LOC115710632	protein_coding	NA	NA	NA	NA	NA	NA
1.1595742426601805e-18	NC_044370.1	51380401	51387599	+	57.5016	7198	Intergenic	Intergenic	-99736	LOC115708007	LOC115708007	XR_004009809	uncharacterized LOC115708007	lncRNA	NA	NA	NA	NA	NA	NA
6.60188296682782e-06	NC_044379.1	19536001	19537599	+	57.4959	1598	Intergenic	Intergenic	-6261	LOC115699903	LOC115699903	XM_030627447	uncharacterized LOC115699903	protein_coding	0	1	NA	-0.925217262	1	NA
0.00016990916948040762-2	NC_044379.1	26080401	26081399	+	57.4959	998	Intergenic	Intergenic	-22716	LOC115698849	LOC115698849	XM_030626050	probable L-type lectin-domain containing receptor kinase S.5	protein_coding	-1.884683159	NA	NA	-2.638750921	NA	NA
0.00016990916948040762	NC_044371.1	4257001	4258199	+	57.4959	1198	Intergenic	Intergenic	-15896	LOC115703690	LOC115703690	XM_030630926	uncharacterized LOC115703690	protein_coding	NA	NA	NA	NA	NA	NA
8.030731275665815e-07	NC_044374.1	65340201	65342999	+	57.4769	2798	Intergenic	Intergenic	-25136	LOC115715636	LOC115715636	XM_030644294	uncharacterized LOC115715636	protein_coding	-0.487231977	1	1	-0.243668156	1	1
1.9993726658848406e-05-2	NC_044371.1	45362801	45363999	+	57.4697	1198	Intergenic	Intergenic	7447	LOC115708422	LOC115708422	XR_004009923	small nucleolar RNA R71	snoRNA	NA	NA	NA	NA	NA	NA
1.9993726658848406e-05-6	NC_044379.1	194001	195399	+	57.4697	1398	Intergenic	Intergenic	163944	LOC115700627	LOC115700627	XM_030628235	protein sym-1	protein_coding	-0.181563454	1	1	-0.164646111	1	1
1.9993726658848406e-05-3	NC_044372.1	5533001	5534599	+	57.4697	1598	Intergenic	Intergenic	-11671	LOC115709915	LOC115709915	XM_030638170	60S ribosomal protein L27a-3	protein_coding	-0.165971978	1	1	-0.85097256	1	1
1.9993726658848406e-05	NC_044371.1	9932001	9933399	+	57.4697	1398	Intergenic	Intergenic	-5876	LOC115708140	LOC115708140	XM_030636341	fructose-bisphosphate aldolase-lysine N-methyltransferase, chloroplastic,	protein_coding	-0.142315367	1	1	-0.622329142	1	1
1.9993726658848406e-05-5	NC_044375.1	64772001	64773399	+	57.4697	1398	Intergenic	Intergenic	-25046	LOC115718474	LOC115718474	XM_030647260	uncharacterized LOC115718474,	protein_coding	0.02199611	1	1	2.408291965	4.54E-05	0.000644355
1.9993726658848406e-05-4	NC_044374.1	60113201	60114799	+	57.4697	1598	Intergenic	Intergenic	-342155	LOC115717877	LOC115717877	XM_030646848	uncharacterized LOC115717877	protein_coding	NA	NA	NA	NA	NA	NA
6.094544927846925e-05	NC_044371.1	47536601	47537799	+	57.4358	1198	Intergenic	Intergenic	-73321	LOC115706904	LOC115706904	XM_030634674	L-ascorbate peroxidase 2, cytosolic-like	protein_coding	NA	NA	NA	NA	NA	NA
6.094544927846925e-05-2	NC_044371.1	65248601	65250199	+	57.4358	1598	Intergenic	Intergenic	33839	LOC115704243	LOC115704243	XM_030631457	uncharacterized LOC115704243	protein_coding	NA	NA	NA	NA	NA	NA
6.094544927846925e-05-4	NC_044372.1	12996401	12998399	+	57.4358	1998	Intergenic	Intergenic	3912	LOC115709656	LOC115709656	XR_004010266	uncharacterized LOC115709656	lncRNA	NA	NA	NA	NA	NA	NA
6.094544927846925e-05-3	NC_044372.1	3307201	3308799	+	57.4358	1598	Intergenic	Intergenic	-9335	LOC115709164	LOC115709164	XM_030637205	probable LRR receptor-like serine/threonine-protein kinase At1g56140	protein_coding	0.958988958	1	1	0.785777033	1	1
8.828817615157092e-07	NC_044376.1	45499001	45501799	+	57.4192	2798	Intergenic	Intergenic	-4793	LOC115722987	LOC115722987	XM_030652381	heavy metal-associated isoprenylated plant protein 21	protein_coding	0	1	NA	-3.118839506	0.592716704	NA
0.00018732735754537063-5	NC_044379.1	35329601	35331199	+	57.3901	1598	Intergenic	Intergenic	11242	LOC115700049	LOC115700049	XM_030627602	uncharacterized LOC115700049	protein_coding	NA	NA	NA	NA	NA	NA
4.0176814221443804e-08	NC_044375.1	55729001	55730999	+	57.3901	1998	Intergenic	Intergenic	-11548	LOC115720899	LOC115720899	XM_030650103	hydroxyproline O-arabinosyltransferase 3	protein_coding	0.107409102	1	1	0.229214647	1	1
0.00018732735754537063-4	NC_044379.1	206001	207199	+	57.3901	1198	Intergenic	Intergenic	175844	LOC115700627	LOC115700627	XM_030628235	protein sym-1	protein_coding	-0.181563454	1	1	-0.164646111	1	1
0.00018732735754537063	NC_044372.1	32756801	32758199	+	57.3901	1398	Intergenic	Intergenic	-22576	LOC115710627	LOC115710627	XM_030638985	uncharacterized LOC115710627	protein_coding	NA	NA	NA	NA	NA	NA
2.6504217977589926e-06-2	NC_044372.1	28410801	28413199	+	57.3901	2398	Intergenic	Intergenic	-14523	LOC115711252	LOC115711252	XM_030639591	uncharacterized LOC115711252	protein_coding	2.490604897	0.000474722	0.006157617	3.085009082	1.02E-06	1.87E-05
2.6504217977589926e-06-3	NC_044379.1	56707201	56709399	+	57.3901	2198	Intergenic	Intergenic	-9530	LOC115700667	LOC115700667	XM_030628286	UPF0481 protein At3g47200	protein_coding	2.925637273	0.000491919	0.006354947	-1.682800261	0.209641359	1
3.244230980900113e-07	NC_044370.1	79500401	79502799	+	57.3901	2398	Intergenic	Intergenic	24346	LOC115703344	LOC115703344	XR_004009116	small nucleolar RNA R71	snoRNA	NA	NA	NA	NA	NA	NA
0.00018732735754537063-2	NC_044377.1	25873001	25874399	+	57.3901	1398	Intergenic	Intergenic	31832	LOC115724619	LOC115724619	XM_030653946	transcription factor MYB120,	protein_coding	3.287995721	0.005232419	0.047221969	3.043853422	0.012252318	0.099190242
2.6504217977589926e-06	NC_044370.1	57650201	57651999	+	57.3901	1798	Intergenic	Intergenic	28049	LOC115712824	LOC115712824	XM_030641212	uncharacterized LOC115712824	protein_coding	-0.587062787	1	1	-0.011658264	1	1
0.00018732735754537063-3	NC_044377.1	26837001	26837999	+	57.3901	998	Intergenic	Intergenic	33161	LOC115696119	LOC115696119	XR_004007714	small nucleolar RNA R71	snoRNA	NA	NA	NA	NA	NA	NA
0.0016617289831396403	NC_044370.1	23913201	23913999	+	57.3901	798	promoter-TSS	-promoter-TSS (LOC115703343)	-830	LOC115703343	LOC115703343	XR_004009115	small nucleolar RNA R71	snoRNA	NA	NA	NA	NA	NA	NA
2.200985627809518e-05	NC_044376.1	43229801	43231599	+	57.3901	1798	Intergenic	Intergenic	-45407	LOC115722561	LOC115722561	XM_030651802	uncharacterized LOC115722561	protein_coding	0.036571188	1	1	0.210854242	1	1
1.4190087264374209e-12	NW_022060454.1	494601	498999	+	57.3633	4398	Intergenic	Intergenic	-7358	LOC115702127	LOC115702127	XM_030629586	#N/A	protein_coding	-1.078418672	0.906335909	1	0.136444746	1	1
9.706255577378575e-07	NC_044379.1	6185601	6187399	+	57.3609	1798	intron	-intron (LOC115699774, intron 5 of 7)	1058	LOC115699774	LOC115699774	XM_030627320	uncharacterized LOC115699774	protein_coding	0	1	NA	-0.925217262	1	NA
7.991975024981249e-06	NC_044373.1	55298801	55300399	+	57.3543	1598	Intergenic	Intergenic	-38232	LOC115714572	LOC115714572	XR_004011079	uncharacterized LOC115714572	lncRNA	0.800741062	1	1	-1.281771022	0.713226963	1
7.991975024981249e-06-2	NC_044378.1	18642801	18644999	+	57.3543	2198	Intergenic	Intergenic	-2232	LOC115698415	LOC115698415	XR_004008163	small nucleolar RNA R71	snoRNA	NA	NA	NA	NA	NA	NA
6.713659090410766e-05	NC_044371.1	14207801	14208999	+	57.344	1198	Intergenic	Intergenic	-40074	LOC115705025	LOC115705025	XM_030632259	UDP-glycosyltransferase 76F1	protein_coding	6.141377577	0.001881026	0.019867558	4.753381993	0.013426985	0.107284779
6.713659090410766e-05-2	NC_044373.1	17710001	17711799	+	57.344	1798	Intergenic	Intergenic	-389989	LOC115713207	LOC115713207	XM_030641691	uncharacterized LOC115713207	protein_coding	NA	NA	NA	NA	NA	NA
3.5655645612246293e-07	NC_044377.1	65893001	65895199	+	57.3363	2198	Intergenic	Intergenic	-6314	LOC115724616	LOC115724616	XM_030653940	uncharacterized LOC115724616	protein_coding	-0.592701958	1	1	-0.895059675	1	1
4.0526279812868634e-23	NC_044376.1	61521001	61528799	+	57.3363	7798	Intergenic	Intergenic	12059	LOC115722659	LOC115722659	XM_030651921	protein TIC 40, chloroplastic,	protein_coding	-0.465107829	1	1	-0.010789331	1	1
4.1069054335850525e-30	NC_044370.1	801	12599	+	57.3296	11798	Intergenic	Intergenic	-6878	LOC115702590	LOC115702590	XM_030630002	kinesin-like protein KIN-14E,	protein_coding	-0.118513174	1	1	-0.066685462	1	1
0.0005821792079951477-2	NC_044371.1	80096001	80096999	+	57.3255	998	intron	-intron (LOC115705967, intron 1 of 2)	27247	LOC115705967	LOC115705967	XM_030633467	uncharacterized LOC115705967,	protein_coding	0.907986941	1	1	-0.479567306	1	1
0.0005821792079951477	NC_044370.1	14933401	14934199	+	57.3255	798	TTS	-TTS (LOC115703330)	260	LOC115703330	LOC115703330	XR_004009104	small nucleolar RNA R71	snoRNA	NA	NA	NA	NA	NA	NA
0.0005821792079951477-5	NC_044377.1	32813801	32814799	+	57.3255	998	Intergenic	Intergenic	-190824	LOC115695107	LOC115695107	XM_030622197	uncharacterized LOC115695107	protein_coding	NA	NA	NA	NA	NA	NA
0.0005821792079951477-4	NC_044376.1	57868001	57868799	+	57.3255	798	Intergenic	Intergenic	24287	LOC115724365	LOC115724365	XR_004013158	small nucleolar RNA R71	snoRNA	NA	NA	NA	NA	NA	NA
0.0005821792079951477-3	NC_044373.1	86208601	86209399	+	57.3255	798	Intergenic	Intergenic	-7870	LOC115712597	LOC115712597	XM_030640898	uncharacterized LOC115712597	protein_coding	0.862643316	1	NA	1.450042333	0.883218522	NA
8.473492652129678e-18	NW_022060454.1	617401	624199	+	57.3183	6798	Intergenic	Intergenic	116642	LOC115702127	LOC115702127	XM_030629586	#N/A	protein_coding	-1.078418672	0.906335909	1	0.136444746	1	1
2.4229726271074898e-05	NC_044370.1	47002401	47003999	+	57.3092	1598	Intergenic	Intergenic	-91888	LOC115720976	LOC115720976	XM_030650204	uncharacterized LOC115720976	protein_coding	NA	NA	NA	NA	NA	NA
3.918731725041116e-07	NC_044376.1	47068601	47070599	+	57.2819	1998	promoter-TSS	-promoter-TSS (LOC115723233)	-725	LOC115723233	LOC115723233	XR_004012924	uncharacterized LOC115723233	lncRNA	NA	NA	NA	NA	NA	NA
0.00020653997848467422	NC_044370.1	79589001	79590199	+	57.2819	1198	Intergenic	Intergenic	13836	LOC115720088	LOC115720088	XM_030649255	uncharacterized LOC115720088,	protein_coding	0.321462579	1	1	-0.657469839	1	1
0.00020653997848467422-2	NC_044373.1	59345801	59346999	+	57.2819	1198	Intergenic	Intergenic	37842	LOC115712300	LOC115712300	XR_004010828	uncharacterized LOC115712300,	lncRNA	-0.961816739	1	1	1.65540677	0.164619907	0.871699913
1.4429711393804743e-07	NC_044374.1	57240201	57242599	+	57.2651	2398	Intergenic	Intergenic	127630	LOC115718233	LOC115718233	XR_004011817	small nucleolar RNA R71	snoRNA	NA	NA	NA	NA	NA	NA
5.495912327555903e-12	NC_044371.1	54787801	54791999	+	57.2629	4198	Intergenic	Intergenic	-121573	LOC115704145	LOC115704145	XM_030631362	uncharacterized LOC115704145	protein_coding	NA	NA	NA	NA	NA	NA
2.4667272294145473e-09	NC_044373.1	78541001	78544199	+	57.2561	3198	Intergenic	Intergenic	-19080	LOC115714331	LOC115714331	XM_030642994	beclin-1-like protein A,	protein_coding	-0.538414931	1	1	-1.484520949	0.130858694	0.728063669
2.4667272294145473e-09-2	NC_044378.1	48536201	48539799	+	57.2561	3598	Intergenic	Intergenic	-106287	LOC115696617	LOC115696617	XM_030623511	uncharacterized LOC115696617	protein_coding	NA	NA	NA	NA	NA	NA
7.395872046845891e-05	NC_044375.1	6537401	6538599	+	57.2506	1198	Intergenic	Intergenic	10716	LOC115718597	LOC115718597	XM_030647408	uncharacterized LOC115718597	protein_coding	-0.135652657	1	1	-0.033352012	1	1
1.3863513436815806e-14	NC_044375.1	78823601	78829799	+	57.2441	6198	Intergenic	Intergenic	-62141	LOC115720379	LOC115720379	XM_030649531	uncharacterized LOC115720379	protein_coding	NA	NA	NA	NA	NA	NA
2.6673974415510486e-05	NC_044371.1	14233601	14234999	+	57.2269	1398	Intergenic	Intergenic	35469	LOC115704954	LOC115704954	XR_004009362	uncharacterized LOC115704954	lncRNA	-0.065340748	1	1	-0.261751886	1	1
2.6673974415510486e-05-2	NC_044375.1	91271601	91272799	+	57.2269	1198	Intergenic	Intergenic	-2510	LOC115719126	LOC115719126	XM_030648050	ABC transporter G family member 11	protein_coding	1.419882389	0.100175345	0.530195667	2.02625817	5.88E-05	0.000815436
3.745290533500631e-10	NC_044370.1	21855001	21858599	+	57.2006	3598	Intergenic	Intergenic	-18658	LOC115706519	LOC115706519	XR_004009598	uncharacterized LOC115706519	lncRNA	NA	NA	NA	NA	NA	NA
0.0006426652483804488	NC_044371.1	23686601	23687799	+	57.1936	1198	Intergenic	Intergenic	-5423	LOC115705561	LOC115705561	XM_030632926	protein MAEA homolog,	protein_coding	0.145126834	1	1	0.135914797	1	1
0.0006426652483804488-2	NC_044372.1	84155201	84156399	+	57.1936	1198	Intergenic	Intergenic	-4806	LOC115711744	LOC115711744	XR_004010622	small nucleolar RNA R71	snoRNA	NA	NA	NA	NA	NA	NA
8.01362687793432e-09-2	NC_044375.1	44154601	44156199	+	57.1852	1598	Intergenic	Intergenic	3784	LOC115721447	LOC115721447	XR_004012470	small nucleolar RNA R71	snoRNA	NA	NA	NA	NA	NA	NA
8.01362687793432e-09	NC_044375.1	44157001	44158599	+	57.1852	1598	Intergenic	Intergenic	6184	LOC115721447	LOC115721447	XR_004012470	small nucleolar RNA R71	snoRNA	NA	NA	NA	NA	NA	NA
2.973401001751566e-09	NC_044370.1	46150601	46153999	+	57.1779	3398	Intergenic	Intergenic	15181	LOC115711365	LOC115711365	XM_030639703	importin-4	protein_coding	-0.175896135	1	1	-0.818259215	1	1
0.00022773297054515815-4	NC_044377.1	41547801	41548999	+	57.1713	1198	Intergenic	Intergenic	64585	LOC115694827	LOC115694827	XR_004007481	uncharacterized LOC115694827	lncRNA	-1.031168748	0.983224038	1	-3.203301484	0.096408397	0.565043547
0.00022773297054515815-5	NC_044377.1	41756201	41757199	+	57.1713	998	Intergenic	Intergenic	25563	LOC115696154	LOC115696154	XR_004007745	small nucleolar RNA R71	snoRNA	NA	NA	NA	NA	NA	NA
0.00022773297054515815	NC_044371.1	72221801	72222999	+	57.1713	1198	Intergenic	Intergenic	-20861	LOC115704339	LOC115704339	XM_030631550	uncharacterized LOC115704339	protein_coding	NA	NA	NA	NA	NA	NA
0.00022773297054515815-6	NC_044377.1	66538001	66539599	+	57.1713	1598	Intergenic	Intergenic	-2051	LOC115724770	LOC115724770	XM_030654115	vacuolar iron transporter homolog 4	protein_coding	-0.01135679	1	1	-1.632161234	0.443757878	1
0.00022773297054515815-3	NC_044373.1	18573601	18574999	+	57.1713	1398	Intergenic	Intergenic	29850	LOC115713208	LOC115713208	XM_030641692	uncharacterized LOC115713208	protein_coding	NA	NA	NA	NA	NA	NA
0.00022773297054515815-2	NC_044372.1	69014201	69015199	+	57.1713	998	Intergenic	Intergenic	33288	LOC115710886	LOC115710886	XM_030639238	uncharacterized LOC115710886	protein_coding	NA	NA	NA	NA	NA	NA
2.9365334411789087e-05-3	NC_044374.1	25987801	25989199	+	57.1432	1398	Intergenic	Intergenic	-195845	LOC115716499	LOC115716499	XM_030645310	probable E3 ubiquitin-protein ligase RHB1A,	protein_coding	-0.422411979	1	1	-0.030241995	1	1
2.9365334411789087e-05-2	NC_044371.1	57524401	57525999	+	57.1432	1598	Intergenic	Intergenic	-16859	LOC115705685	LOC115705685	XM_030633083	protein MID1-COMPLEMENTING ACTIVITY 1,	protein_coding	1.174711222	0.763697395	1	-1.103640782	0.820621476	1
2.9365334411789087e-05-4	NC_044377.1	50217001	50218999	+	57.1432	1998	Intergenic	Intergenic	20389	LOC115725252	LOC115725252	XM_030654701	stromal 70 kDa heat shock-related protein, chloroplastic	protein_coding	-1.426445177	0.015825156	0.118247517	0.234130517	1	1
2.9365334411789087e-05-5	NC_044378.1	38111801	38113399	+	57.1432	1598	Intergenic	Intergenic	29115	LOC115698027	LOC115698027	XR_004008021	uncharacterized LOC115698027	lncRNA	3.326751962	0.485942891	NA	3.914125128	0.382835663	1
2.9365334411789087e-05	NC_044370.1	33228201	33230599	+	57.1432	2398	exon	-exon (LOC115719885, exon 3 of 13)	628	LOC115719885	LOC115719885	XM_030649065	uncharacterized LOC115719885	protein_coding	0.410947537	1	NA	0.998328082	1	NA
1.064563507163777e-05	NC_044379.1	24757001	24758999	+	57.1338	1998	Intergenic	Intergenic	122268	LOC115701250	LOC115701250	XM_030628998	uncharacterized LOC115701250	protein_coding	-0.840028967	1	1	0.816752061	1	1
1.1359885645030317e-18	NC_044376.1	61540401	61547599	+	57.128	7198	Intergenic	Intergenic	-15377	LOC115724051	LOC115724051	XM_030653504	uncharacterized LOC115724051	protein_coding	NA	NA	NA	NA	NA	NA
1.4179646576031663e-06	NC_044378.1	34336401	34338399	+	57.1201	1998	Intergenic	Intergenic	-32357	LOC115696515	LOC115696515	XM_030623415	uncharacterized LOC115696515	protein_coding	NA	NA	NA	NA	NA	NA
8.976077020365088e-05	NC_044372.1	11610201	11611399	+	57.0581	1198	Intergenic	Intergenic	-22271	LOC115709155	LOC115709155	XM_030637192	WRKY transcription factor 72A	protein_coding	1.530283883	0.783482932	1	2.007123654	0.59786612	1
3.232884934241215e-05	NC_044374.1	17234401	17236199	+	57.0581	1798	Intergenic	Intergenic	-30421	LOC115718314	LOC115718314	XR_004011893	small nucleolar RNA R71	snoRNA	NA	NA	NA	NA	NA	NA
8.976077020365088e-05-2	NC_044374.1	47522801	47523799	+	57.0581	998	intron	-intron (LOC115717803, intron 3 of 11)	14358	LOC115717803	LOC115717803	XM_030646776	nodulation receptor kinase-like	protein_coding	NA	NA	NA	NA	NA	NA
1.06102314418303e-08	NC_044377.1	53355401	53358399	+	57.0581	2998	Intergenic	Intergenic	-9087	LOC115695264	LOC115695264	XM_030622342	uncharacterized LOC115695264	protein_coding	NA	NA	NA	NA	NA	NA
0.0007094850934002549-2	NC_044373.1	82389601	82390399	+	57.0581	798	Intergenic	Intergenic	5107	LOC115714730	LOC115714730	XR_004011111	uncharacterized LOC115714730	lncRNA	NA	NA	NA	NA	NA	NA
0.0007094850934002549	NC_044371.1	15640801	15641999	+	57.0581	1198	Intergenic	Intergenic	-36108	LOC115706180	LOC115706180	XM_030633735	#N/A	protein_coding	-0.595501274	1	1	-0.042584447	1	1
1.1713525887000748e-05-2	NC_044373.1	40303201	40305599	+	57.0581	2398	Intergenic	Intergenic	21836	LOC115713416	LOC115713416	XM_030641898	F-box/kelch-repeat protein At1g51550-like	protein_coding	-0.31138354	1	1	-0.500768164	1	1
8.976077020365088e-05-3	NW_022060359.1	241601	243599	+	57.0581	1998	NA	NA	NA	NA			#N/A		NA	NA	NA	NA	NA	NA
4.264679983215621e-06	NC_044378.1	55955401	55956799	+	57.0581	1398	Intergenic	Intergenic	-20620	LOC115696663	LOC115696663	XM_030623553	uncharacterized LOC115696663	protein_coding	NA	NA	NA	NA	NA	NA
0.0007094850934002549-3	NW_022060454.1	703601	704399	+	57.0581	798	Intergenic	Intergenic	199842	LOC115702127	LOC115702127	XM_030629586	#N/A	protein_coding	-1.078418672	0.906335909	1	0.136444746	1	1
1.5589169965537936e-06	NC_044370.1	98323201	98324199	+	57.0581	998	Intergenic	Intergenic	-31576	LOC115703461	LOC115703461	XR_004009223	small nucleolar RNA R71	snoRNA	NA	NA	NA	NA	NA	NA
1.1713525887000748e-05	NC_044370.1	94355001	94356599	+	57.0581	1598	Intergenic	Intergenic	13945	LOC115698158	LOC115698158	XM_030625339	inactive TPR repeat-containing thioredoxin TTL3	protein_coding	-0.747772297	NA	NA	0.82037164	NA	NA
0.000251111671692782	NC_044373.1	6296001	6296999	+	57.0581	998	Intergenic	Intergenic	10187	LOC115715519	LOC115715519	XR_004011386	small nucleolar RNA R71	snoRNA	NA	NA	NA	NA	NA	NA
2.103124658691551e-07	NC_044375.1	73849201	73852199	+	57.0581	2998	Intergenic	Intergenic	7055	LOC115720343	LOC115720343	XM_030649495	uncharacterized LOC115720343	protein_coding	NA	NA	NA	NA	NA	NA
0.002031836526259536	NC_044378.1	33313401	33313999	+	57.0581	598	Intergenic	Intergenic	-18723	LOC115698139	LOC115698139	XM_030625315	cytochrome c oxidase assembly protein COX11, mitochondrial,	protein_coding	-0.228925673	1	1	-0.132154082	1	1
1.1650743563294865e-08-2	NC_044374.1	56993001	56993999	+	57.015	998	Intergenic	Intergenic	14282	LOC115716353	LOC115716353	XM_030645131	#N/A	protein_coding	-2.682177321	0.008411021	0.070005568	1.838348962	0.202641614	1
1.1650743563294865e-08	NC_044374.1	56990801	56992199	+	57.015	1398	Intergenic	Intergenic	16282	LOC115716353	LOC115716353	XM_030645131	#N/A	protein_coding	-2.682177321	0.008411021	0.070005568	1.838348962	0.202641614	1
8.518891553895172e-08	NC_044372.1	36423001	36426999	+	57.0088	3998	Intergenic	Intergenic	-5941	LOC115709359	LOC115709359	XM_030637444	aquaporin TIP1-1	protein_coding	0.286255246	1	1	0.188894445	1	1
1.713887096311359e-06	NC_044373.1	43512801	43514799	+	56.9952	1998	Intergenic	Intergenic	267807	LOC115713438	LOC115713438	XM_030641921	uncharacterized LOC115713438	protein_coding	0	1	NA	-0.925217262	1	NA
1.2888692969071529e-05	NC_044371.1	80033201	80034999	+	56.9812	1798	Intergenic	Intergenic	-29236	LOC115705931	LOC115705931	XM_030633412	uncharacterized LOC115705931,	protein_coding	-0.634339253	1	1	0.012874889	1	1
3.55921069375621e-05	NC_044377.1	43336801	43338399	+	56.9715	1598	Intergenic	Intergenic	-277381	LOC115695201	LOC115695201	XM_030622286	uncharacterized LOC115695201	protein_coding	NA	NA	NA	NA	NA	NA
9.889036671569229e-05	NC_044375.1	49402601	49404399	+	56.959	1798	Intergenic	Intergenic	47961	LOC115720660	LOC115720660	XM_030649823	peroxisomal adenine nucleotide carrier 1	protein_coding	1.888233506	0.000214747	0.003071486	0.089449583	1	1
9.889036671569229e-05-2	NC_044375.1	82506001	82507199	+	56.959	1198	Intergenic	Intergenic	-16277	LOC115719669	LOC115719669	XM_030648791	uncharacterized LOC115719669	protein_coding	-0.027374352	1	1	-0.410109608	1	1
9.889036671569229e-05-3	NC_044375.1	94762801	94763999	+	56.959	1198	Intergenic	Intergenic	-5973	LOC115720543	LOC115720543	XM_030649687	spermidine coumaroyl-CoA acyltransferase-like	protein_coding	4.079259162	0.007787655	0.065503161	3.090989449	0.063014792	0.397051816
2.5390279931984923e-07	NC_044378.1	63103401	63105799	+	56.9513	2398	Intergenic	Intergenic	15639	LOC115697202	LOC115697202	XM_030624115	homeobox-leucine zipper protein ATHB-14,	protein_coding	0.017890697	1	1	-2.711547978	1.26E-05	0.000195494
6.90656383395932e-07	NC_044375.1	56785601	56788799	+	56.9422	3198	Intergenic	Intergenic	49476	LOC115720210	LOC115720210	XM_030649366	zinc finger BED domain-containing protein RICESLEEPER 2	protein_coding	0.787565129	1	1	-0.424479101	1	1
5.207241426817959e-09	NC_044370.1	52227601	52231399	+	56.9354	3798	Intergenic	Intergenic	40504	LOC115702518	LOC115702518	XM_030629949	ethylene-responsive transcription factor ERF022-like	protein_coding	0.410947537	1	NA	0.998328082	1	NA
1.8842695847042332e-06	NC_044377.1	9056001	9059199	+	56.9316	3198	Intergenic	Intergenic	-6099	LOC115724543	LOC115724543	XR_004013221	uncharacterized LOC115724543	lncRNA	0.874084428	1	1	2.356000184	0.002317167	0.023173021
0.0007833084023245923-3	NC_044379.1	25525001	25525799	+	56.9188	798	Intergenic	Intergenic	-27536	LOC115700810	LOC115700810	XM_030628463	putative lipid-transfer protein DIR1	protein_coding	NA	NA	NA	NA	NA	NA
3.796322950860837e-08	NC_044371.1	27701401	27703999	+	56.9188	2598	Intergenic	Intergenic	21606	LOC115703960	LOC115703960	XM_030631185	uncharacterized LOC115703960	protein_coding	NA	NA	NA	NA	NA	NA
0.0007833084023245923	NC_044370.1	94517201	94518399	+	56.9188	1198	Intergenic	Intergenic	7715	LOC115698192	LOC115698192	XM_030625399	uncharacterized WD repeat-containing protein C2A9.03,	protein_coding	1.156225535	0.458224964	1	-0.342839105	1	1
0.0007833084023245923-2	NC_044379.1	13783601	13784599	+	56.9188	998	Intergenic	Intergenic	-13843	LOC115699865	LOC115699865	XM_030627407	uncharacterized LOC115699865	protein_coding	NA	NA	NA	NA	NA	NA
2.336249218237527e-12	NC_044378.1	48363201	48368199	+	56.9188	4998	Intergenic	Intergenic	-59897	LOC115696615	LOC115696615	XM_030623510	uncharacterized LOC115696615	protein_coding	NA	NA	NA	NA	NA	NA
1.338893874341102e-37	NC_044377.1	24603401	24617999	+	56.904	14598	Intergenic	Intergenic	258552	LOC115695060	LOC115695060	XM_030622157	uncharacterized LOC115695060	protein_coding	NA	NA	NA	NA	NA	NA
2.1221365021884804e-09	NC_044377.1	7198801	7202199	+	56.903	3398	Intergenic	Intergenic	-10585	LOC115725597	LOC115725597	XR_004013428	uncharacterized LOC115725597	lncRNA	3.829624827	0.379208599	NA	4.416997873	0.288279206	1
1.418192912335424e-05	NC_044375.1	33014601	33016799	+	56.903	2198	Intergenic	Intergenic	-8955	LOC115720035	LOC115720035	XM_030649200	uncharacterized LOC115720035	protein_coding	NA	NA	NA	NA	NA	NA
3.91854988815649e-05-2	NC_044376.1	32588601	32590399	+	56.8833	1798	Intergenic	Intergenic	6403	LOC115723769	LOC115723769	XM_030653241	uncharacterized LOC115723769	protein_coding	NA	NA	NA	NA	NA	NA
0.0022471386664969545-2	NC_044375.1	51807401	51808199	+	56.8833	798	Intergenic	Intergenic	-10912	LOC115720181	LOC115720181	XM_030649339	uncharacterized mitochondrial protein AtMg00810-like	protein_coding	NA	NA	NA	NA	NA	NA
3.91854988815649e-05-3	NC_044377.1	17531801	17534399	+	56.8833	2598	Intergenic	Intergenic	14562	LOC115724434	LOC115724434	XM_030653719	uncharacterized LOC115724434,	protein_coding	1.312511161	0.661769982	1	-0.319934342	1	1
0.0022471386664969545	NC_044374.1	63052401	63052999	+	56.8833	598	Intergenic	Intergenic	-5540	LOC115716835	LOC115716835	XR_004011609	uncharacterized LOC115716835	lncRNA	NA	NA	NA	NA	NA	NA
3.91854988815649e-05	NC_044371.1	58740001	58741799	+	56.8833	1798	Intergenic	Intergenic	-5112	LOC115708323	LOC115708323	XM_030636564	pyruvate dehydrogenase E1 component subunit alpha-3, chloroplastic	protein_coding	-0.401747257	1	1	0.277752402	1	1
7.590727194439377e-07	NC_044373.1	22515601	22517199	+	56.8833	1598	Intergenic	Intergenic	-19269	LOC115715498	LOC115715498	XR_004011367	small nucleolar RNA R71	snoRNA	NA	NA	NA	NA	NA	NA
0.00010895174407120441	NC_044371.1	23691601	23692599	+	56.8578	998	Intergenic	Intergenic	-10323	LOC115705561	LOC115705561	XM_030632926	protein MAEA homolog,	protein_coding	0.145126834	1	1	0.135914797	1	1
0.00010895174407120441-3	NC_044374.1	57353001	57354199	+	56.8578	1198	Intergenic	Intergenic	-132678	LOC115718311	LOC115718311	XR_004011890	small nucleolar RNA R71	snoRNA	NA	NA	NA	NA	NA	NA
0.00010895174407120441-2	NC_044372.1	32167601	32168399	+	56.8578	798	Intergenic	Intergenic	-43484	LOC115709282	LOC115709282	XM_030637350	phenylalanine ammonia-lyase	protein_coding	1.4568747	0.059712269	0.352425223	0.975177955	1	1
5.39061003414655e-11	NC_044374.1	32541601	32545999	+	56.8346	4398	promoter-TSS	-promoter-TSS (LOC115718328)	-208	LOC115718328	LOC115718328	XR_004011907	small nucleolar RNA R71	snoRNA	NA	NA	NA	NA	NA	NA
8.342672829063608e-07	NW_022060457.1	70401	73599	+	56.8237	3198	NA	NA	NA	NA			#N/A		NA	NA	NA	NA	NA	NA
0.00030535701288002595	NC_044377.1	10609201	10610199	+	56.8237	998	exon	-exon (LOC115694966, exon 2 of 4)	346	LOC115694966	LOC115694966	XM_030622068	uncharacterized LOC115694966	protein_coding	0.675080632	1	1	2.178266112	0.221020537	1
1.560511468917551e-05-2	NC_044379.1	1925401	1926999	+	56.8237	1598	Intergenic	Intergenic	-863589	LOC115698919	LOC115698919	XM_030626122	extracellular ribonuclease LE	protein_coding	6.151631711	1.47E-17	1.49E-15	3.483828726	2.08E-15	9.58E-14
1.560511468917551e-05	NC_044371.1	51823801	51825399	+	56.8237	1598	Intergenic	Intergenic	39703	LOC115705418	LOC115705418	XR_004009460	uncharacterized LOC115705418	lncRNA	NA	NA	NA	NA	NA	NA
6.8906310178769986e-09	NC_044377.1	51906001	51909199	+	56.8096	3198	Intergenic	Intergenic	25868	LOC115695257	LOC115695257	XM_030622336	uncharacterized LOC115695257	protein_coding	NA	NA	NA	NA	NA	NA
4.314250662483249e-05-2	NC_044378.1	20035001	20036399	+	56.7936	1398	Intergenic	Intergenic	-11810	LOC115697822	LOC115697822	XM_030624959	signaling peptide TAXIMIN 1	protein_coding	3.410917437	6.39E-06	0.000131561	1.847706743	0.089454215	0.531261196
4.314250662483249e-05	NC_044373.1	88690001	88691399	+	56.7936	1398	Intergenic	Intergenic	-11660	LOC115712951	LOC115712951	XM_030641385	RPM1-interacting protein 4,	protein_coding	0.513994994	1	1	0.093559965	1	1
3.709981986584976e-12	NC_044377.1	44028201	44032799	+	56.7755	4598	Intergenic	Intergenic	-73532	LOC115695668	LOC115695668	XM_030622727	uncharacterized protein At1g66480	protein_coding	-0.071708717	1	1	-3.239340754	1.77E-07	3.64E-06
0.0008648764854707624-2	NC_044379.1	203001	203799	+	56.7755	798	Intergenic	Intergenic	172644	LOC115700627	LOC115700627	XM_030628235	protein sym-1	protein_coding	-0.181563454	1	1	-0.164646111	1	1
0.0008648764854707624	NC_044370.1	61260401	61261199	+	56.7755	798	Intergenic	Intergenic	-64132	LOC115703365	LOC115703365	XR_004009137	small nucleolar RNA R71	snoRNA	NA	NA	NA	NA	NA	NA
0.00012004037567303539	NC_044370.1	70630601	70631799	+	56.7547	1198	Intergenic	Intergenic	6944	LOC115713874	LOC115713874	XM_030642357	agamous-like MADS-box protein AGL62	protein_coding	3.019951659	0.121524345	0.616212737	0.277885492	1	1
0.00012004037567303539-2	NC_044372.1	17964001	17965399	+	56.7547	1398	Intergenic	Intergenic	62255	LOC115710497	LOC115710497	XM_030638862	uncharacterized LOC115710497	protein_coding	-0.137960564	1	1	-0.062262162	1	1
1.717132729768742e-05	NC_044374.1	77507201	77508799	+	56.7431	1598	Intergenic	Intergenic	42042	LOC115718006	LOC115718006	XM_030646974	uncharacterized LOC115718006	protein_coding	0.410947537	1	NA	0.998328082	1	NA
1.4967667034355693e-07	NC_044375.1	43984801	43987399	+	56.7023	2598	Intergenic	Intergenic	-25510	LOC115720115	LOC115720115	XM_030649277	uncharacterized LOC115720115	protein_coding	NA	NA	NA	NA	NA	NA
1.4967667034355693e-07-2	NW_022060487.1	113001	115399	+	56.7023	2398	NA	NA	NA	NA			#N/A		NA	NA	NA	NA	NA	NA
0.0024855605850001533	NC_044370.1	77006801	77007599	+	56.7023	798	Intergenic	Intergenic	14156	LOC115724946	LOC115724946	XM_030654330	uncharacterized mitochondrial protein AtMg00860-like	protein_coding	NA	NA	NA	NA	NA	NA
0.0024855605850001533-2	NC_044377.1	45791601	45792199	+	56.7023	598	Intergenic	Intergenic	45935	LOC115694771	LOC115694771	XM_030621857	plasma membrane ATPase 4	protein_coding	-0.479375713	1	1	-1.310704756	0.35077982	1
6.863338139956615e-06	NC_044375.1	12710201	12712199	+	56.7023	1998	Intergenic	Intergenic	19503	LOC115719861	LOC115719861	XM_030649041	uncharacterized LOC115719861	protein_coding	NA	NA	NA	NA	NA	NA
0.0024855605850001533-3	NC_044378.1	44136001	44136799	+	56.7023	798	intron	-intron (LOC115696835, intron 6 of 6)	16404	LOC115696835	LOC115696835	XM_030623717	uncharacterized LOC115696835,	protein_coding	-0.10528666	1	1	-0.373220862	1	1
0.0003367508012936634	NC_044372.1	1472201	1473199	+	56.7023	998	Intergenic	Intergenic	-15735	LOC115709739	LOC115709739	XM_030637924	uncharacterized LOC115709739	protein_coding	-0.623888124	1	1	0.186956658	1	1
0.0003367508012936634-2	NC_044372.1	52781601	52782799	+	56.7023	1198	Intergenic	Intergenic	48579	LOC115710762	LOC115710762	XM_030639115	uncharacterized LOC115710762	protein_coding	NA	NA	NA	NA	NA	NA
0.0003367508012936634-4	NC_044376.1	8691401	8692399	+	56.7023	998	Intergenic	Intergenic	6873	LOC115722791	LOC115722791	XM_030652117	E3 ubiquitin-protein ligase MIEL1	protein_coding	0.554696338	1	1	0.401200411	1	1
0.0003367508012936634-3	NC_044372.1	71253601	71254799	+	56.7023	1198	Intergenic	Intergenic	-25423	LOC115708968	LOC115708968	XR_004010127	uncharacterized LOC115708968	lncRNA	NA	NA	NA	NA	NA	NA
1.3789137897764702e-09	NC_044379.1	49436201	49439999	+	56.6829	3798	intron	-intron (LOC115701527, intron 2 of 3)	1798	LOC115701527	LOC115701527	XR_004008568	uncharacterized LOC115701527	lncRNA	NA	NA	NA	NA	NA	NA
1.8894962723972617e-05-2	NC_044375.1	82034801	82036599	+	56.6612	1798	Intergenic	Intergenic	12055	LOC115720400	LOC115720400	XM_030649549	uncharacterized LOC115720400	protein_coding	NA	NA	NA	NA	NA	NA
1.8894962723972617e-05	NC_044375.1	73352601	73354399	+	56.6612	1798	Intergenic	Intergenic	-3376	LOC115721397	LOC115721397	XM_030650682	subtilisin-like protease SBT4.6	protein_coding	1.987987413	0.80439245	NA	2.575354829	0.69290706	NA
0.00013226156144738194	NC_044374.1	446201	447399	+	56.6494	1198	Intergenic	Intergenic	3969	LOC115717328	LOC115717328	XM_030646300	GRF1-interacting factor 1	protein_coding	-0.682749523	1	1	-2.231477353	0.024228777	0.177889041
0.00013226156144738194-2	NC_044376.1	12496001	12497599	+	56.6494	1598	Intergenic	Intergenic	-7959	LOC115722145	LOC115722145	XM_030651276	nuclear pore complex protein NUP160	protein_coding	0.148076848	1	1	-0.075318787	1	1
2.1171100104887507e-16	NW_022060476.1	577801	585399	+	56.6405	7598	Intergenic	Intergenic	-150200	LOC115702188	LOC115702188	XM_030629636	#N/A	protein_coding	NA	NA	NA	NA	NA	NA
0.0009550100859285098-4	NC_044379.1	13989601	13990799	+	56.6281	1198	Intergenic	Intergenic	-10341	LOC115699867	LOC115699867	XM_030627410	uncharacterized LOC115699867	protein_coding	NA	NA	NA	NA	NA	NA
0.0009550100859285098-2	NC_044370.1	82574601	82575799	+	56.6281	1198	Intergenic	Intergenic	8197	LOC115725446	LOC115725446	XM_030654976	uncharacterized LOC115725446	protein_coding	NA	NA	NA	NA	NA	NA
0.0009550100859285098	NC_044370.1	40319801	40320999	+	56.6281	1198	Intergenic	Intergenic	36550	LOC115720315	LOC115720315	XM_030649469	DNA polymerase epsilon catalytic subunit A-like	protein_coding	-2.453860287	0.718540797	NA	0	1	NA
0.0009550100859285098-3	NC_044372.1	53462801	53463799	+	56.6281	998	Intergenic	Intergenic	-13375	LOC115711745	LOC115711745	XR_004010623	small nucleolar RNA R71	snoRNA	NA	NA	NA	NA	NA	NA
4.467522710939965e-07	NC_044379.1	5575601	5577799	+	56.6166	2198	Intergenic	Intergenic	-290580	LOC115701194	LOC115701194	XM_030628916	39S ribosomal protein L28, mitochondrial	protein_coding	-0.292764956	1	1	-0.319866486	1	1
6.172340872386944e-16	NC_044370.1	44389001	44395199	+	56.6067	6198	Intergenic	Intergenic	36551	LOC115711182	LOC115711182	XM_030639513	cyclin-D3-3	protein_coding	1.299093184	0.47689422	1	-0.147377047	1	1
2.6500451967016897e-12	NC_044374.1	69116401	69120999	+	56.5877	4598	Intergenic	Intergenic	-39559	LOC115717927	LOC115717927	XM_030646895	uncharacterized LOC115717927	protein_coding	NA	NA	NA	NA	NA	NA
1.729110075632309e-11	NW_022060454.1	874201	878199	+	56.578	3998	Intergenic	Intergenic	372042	LOC115702127	LOC115702127	XM_030629586	#N/A	protein_coding	-1.078418672	0.906335909	1	0.136444746	1	1
7.315806494781037e-08	NC_044378.1	48765401	48767999	+	56.578	2598	Intergenic	Intergenic	49579	LOC115696618	LOC115696618	XM_030623512	uncharacterized LOC115696618	protein_coding	NA	NA	NA	NA	NA	NA
0.0003713898567415948	NC_044376.1	51415001	51415999	+	56.578	998	Intergenic	Intergenic	79979	LOC115722540	LOC115722540	XM_030651776	protease Do-like 7,	protein_coding	0.03047551	1	1	-0.243068909	1	1
8.302646775055894e-06-2	NC_044377.1	39514801	39516599	+	56.5528	1798	Intergenic	Intergenic	72887	LOC115695169	LOC115695169	XM_030622260	uncharacterized LOC115695169	protein_coding	NA	NA	NA	NA	NA	NA
8.302646775055894e-06	NC_044372.1	37135401	37136999	+	56.5528	1598	Intergenic	Intergenic	-87709	LOC115709598	LOC115709598	XM_030637732	serine/threonine protein phosphatase 2A 57 kDa regulatory subunit B' beta isoform	protein_coding	0.475793216	1	1	0.915614782	1	1
0.00014573144442722329	NC_044370.1	64914601	64915799	+	56.5419	1198	Intergenic	Intergenic	-12659	LOC115702545	LOC115702545	XR_004008915	uncharacterized LOC115702545	lncRNA	NA	NA	NA	NA	NA	NA
0.00014573144442722329-5	NC_044379.1	21498401	21499599	+	56.5419	1198	Intergenic	Intergenic	-42716	LOC115701579	LOC115701579	XM_030629398	casparian strip membrane protein 1	protein_coding	-0.550844758	1	1	-6.009365432	0.000716184	0.008083825
0.00014573144442722329-4	NC_044378.1	52567201	52568399	+	56.5419	1198	Intergenic	Intergenic	21315	LOC115697458	LOC115697458	XM_030624470	protein DEHYDRATION-INDUCED 19	protein_coding	-0.654568186	1	1	-0.084015841	1	1
0.00014573144442722329-2	NC_044372.1	5623801	5624999	+	56.5419	1198	Intergenic	Intergenic	11108	LOC115709614	LOC115709614	XM_030637753	uncharacterized LOC115709614	protein_coding	0.250219864	1	1	-0.309812784	1	1
0.00014573144442722329-3	NC_044372.1	64029001	64030399	+	56.5419	1398	Intergenic	Intergenic	-20650	LOC115709684	LOC115709684	XM_030637851	presenilin-like protein At2g29900	protein_coding	0.202034678	1	1	0.016349626	1	1
8.034443505472705e-08	NC_044379.1	10573401	10576199	+	56.5274	2798	Intergenic	Intergenic	-24055	LOC115701598	LOC115701598	XR_004008592	small nucleolar RNA R71	snoRNA	NA	NA	NA	NA	NA	NA
0.002749627853311693	NC_044373.1	9493401	9494199	+	56.5147	798	Intergenic	Intergenic	12798	LOC115713161	LOC115713161	XM_030641649	protein ALP1-like	protein_coding	NA	NA	NA	NA	NA	NA
5.75832302443857e-05	NC_044370.1	24343801	24345799	+	56.5147	1998	Intergenic	Intergenic	-22731	LOC115703258	LOC115703258	XR_004009036	small nucleolar RNA R71	snoRNA	NA	NA	NA	NA	NA	NA
0.002749627853311693-4	NW_022060476.1	967801	968399	+	56.5147	598	Intergenic	Intergenic	236300	LOC115702188	LOC115702188	XM_030629636	#N/A	protein_coding	NA	NA	NA	NA	NA	NA
5.75832302443857e-05-3	NC_044374.1	72136601	72138399	+	56.5147	1798	Intergenic	Intergenic	-148166	LOC115717117	LOC115717117	XM_030646063	SPX domain-containing membrane protein At4g22990,	protein_coding	-1.740435318	0.009002601	0.074050923	-0.257529488	1	1
5.75832302443857e-05-2	NC_044374.1	35191001	35192399	+	56.5147	1398	Intergenic	Intergenic	116241	LOC115717713	LOC115717713	XM_030646693	uncharacterized LOC115717713	protein_coding	NA	NA	NA	NA	NA	NA
0.002749627853311693-2	NC_044377.1	24638401	24638999	+	56.5147	598	Intergenic	Intergenic	230552	LOC115695060	LOC115695060	XM_030622157	uncharacterized LOC115695060	protein_coding	NA	NA	NA	NA	NA	NA
0.002749627853311693-3	NC_044379.1	32381401	32382199	+	56.5147	798	Intergenic	Intergenic	11842	LOC115701184	LOC115701184	XR_004008520	uncharacterized LOC115701184	lncRNA	0.410947537	1	NA	0.998328082	1	NA
1.3378897906323073e-06	NC_044377.1	44270001	44272399	+	56.5147	2398	Intergenic	Intergenic	66180	LOC115724943	LOC115724943	XM_030654320	ubiquitin thioesterase OTU1,	protein_coding	-0.496454632	1	1	-0.204237474	1	1
8.16177011823301e-10	NC_044373.1	68828401	68832199	+	56.5147	3798	Intergenic	Intergenic	-11326	LOC115712262	LOC115712262	XM_030640519	uncharacterized LOC115712262	protein_coding	-1.526799538	0.157331899	0.751775065	1.652668767	0.083082184	0.498391596
2.287948771799217e-05	NC_044379.1	42409401	42410999	+	56.4934	1598	exon	-exon (LOC115700126, exon 1 of 3)	331	LOC115700126	LOC115700126	XM_030627688	uncharacterized LOC115700126	protein_coding	NA	NA	NA	NA	NA	NA
2.1792834604036215e-07	NC_044372.1	62252601	62255199	+	56.4873	2598	Intergenic	Intergenic	-221116	LOC115709423	LOC115709423	XM_030637524	dnaJ homolog subfamily C member 16,	protein_coding	0.371549908	1	1	-0.095907037	1	1
0.0010546180225072485	NC_044378.1	49197201	49198199	+	56.4763	998	Intergenic	Intergenic	9369	LOC115697700	LOC115697700	XM_030624795	berberine bridge enzyme-like 15	protein_coding	0.752704021	1	1	-0.409867128	1	1
0.0004096118277456021-2	NC_044377.1	31247801	31248999	+	56.4506	1198	Intergenic	Intergenic	20300	LOC115724890	LOC115724890	XM_030654256	formin-like protein 5	protein_coding	-0.049163668	1	1	-0.046593451	1	1
0.0004096118277456021	NC_044374.1	82171001	82171999	+	56.4506	998	Intergenic	Intergenic	12295	LOC115718066	LOC115718066	XM_030647029	uncharacterized LOC115718066	protein_coding	NA	NA	NA	NA	NA	NA
0.0004096118277456021-3	NC_044379.1	26338801	26340199	+	56.4506	1398	Intergenic	Intergenic	11298	LOC115699963	LOC115699963	XM_030627509	uncharacterized LOC115699963	protein_coding	2.684200477	0.669944938	NA	2.309797514	0.740283256	NA
1.4704298617007401e-06	NC_044377.1	295201	297399	+	56.4506	2198	Intergenic	Intergenic	-19924	LOC115695619	LOC115695619	XM_030622676	heavy metal-associated isoprenylated plant protein 47-like	protein_coding	0.746422942	1	NA	3.745856045	0.208679766	1
2.6165602585662547e-20	NC_044370.1	59458401	59466599	+	56.4369	8198	Intergenic	Intergenic	-2694	LOC115703347	LOC115703347	XR_004009119	small nucleolar RNA R71	snoRNA	NA	NA	NA	NA	NA	NA
0.0001605781331195123	NC_044372.1	38235001	38236199	+	56.4322	1198	Intergenic	Intergenic	-31970	LOC115709827	LOC115709827	XM_030638061	FAD synthase,	protein_coding	-0.754294613	1	1	0.119496262	1	1
1.1851838333562606e-20	NC_044375.1	84954001	84962599	+	56.4183	8598	Intergenic	Intergenic	-15495	LOC115720438	LOC115720438	XM_030649587	uncharacterized LOC115720438	protein_coding	NA	NA	NA	NA	NA	NA
2.5177025807427077e-05	NC_044372.1	60423401	60425599	+	56.4075	2198	Intergenic	Intergenic	1134	LOC115711714	LOC115711714	XR_004010594	small nucleolar RNA R71	snoRNA	NA	NA	NA	NA	NA	NA
2.5177025807427077e-05-2	NC_044374.1	40648601	40650799	+	56.4075	2198	Intergenic	Intergenic	41419	LOC115717757	LOC115717757	XM_030646733	uncharacterized LOC115717757	protein_coding	NA	NA	NA	NA	NA	NA
2.644738393404302e-09	NC_044374.1	77541401	77544999	+	56.4029	3598	Intergenic	Intergenic	6842	LOC115718006	LOC115718006	XM_030646974	uncharacterized LOC115718006	protein_coding	0.410947537	1	NA	0.998328082	1	NA
1.0044075514168234e-05	NC_044374.1	57666001	57668599	+	56.3988	2598	Intergenic	Intergenic	125406	LOC115715662	LOC115715662	XM_030644321	peroxidase P7	protein_coding	3.876751571	0.144051311	0.700722984	1.905063134	0.609087918	1
1.0044075514168234e-05-2	NC_044377.1	13170201	13172199	+	56.3988	1998	Intergenic	Intergenic	-63218	LOC115724658	LOC115724658	XM_030653997	uncharacterized LOC115724658	protein_coding	1.723236274	0.218258922	0.957023555	-0.509942138	1	1
1.6161010611273148e-06	NC_044377.1	48309201	48310999	+	56.3858	1798	Intergenic	Intergenic	-46828	LOC115695227	LOC115695227	XM_030622306	uncharacterized LOC115695227	protein_coding	0.410947537	1	NA	0.998328082	1	NA
2.0747647020039854e-12	NC_044373.1	52030601	52035999	+	56.3785	5398	intron	-intron (LOC115713501, intron 1 of 3)	2388	LOC115713501	LOC115713501	XM_030641984	uncharacterized LOC115713501	protein_coding	NA	NA	NA	NA	NA	NA
2.629578677239271e-07	NC_044373.1	91145001	91147399	+	56.3765	2398	Intergenic	Intergenic	4372	LOC115715104	LOC115715104	XM_030643909	11S globulin	protein_coding	12.19203516	7.52E-07	1.84E-05	8.788705063	9.26E-05	0.001228946
1.183478137914393e-09	NC_044379.1	4792001	4795999	+	56.3596	3998	Intergenic	Intergenic	2134	LOC115699144	LOC115699144	XM_030626391	uncharacterized LOC115699144	protein_coding	NA	NA	NA	NA	NA	NA
6.981243988483287e-05	NC_044371.1	56669201	56671599	+	56.3201	2398	Intergenic	Intergenic	-23890	LOC115705109	LOC115705109	XM_030632350	#N/A	protein_coding	0	1	NA	-0.925217262	1	NA
6.981243988483287e-05-2	NC_044372.1	51139201	51140999	+	56.3201	1798	Intergenic	Intergenic	-26428	LOC115710754	LOC115710754	XM_030639106	uncharacterized mitochondrial protein AtMg00310-like	protein_coding	NA	NA	NA	NA	NA	NA
0.003042148180198938	NC_044372.1	64816601	64817199	+	56.3201	598	Intergenic	Intergenic	-27433	LOC115710861	LOC115710861	XM_030639216	uncharacterized LOC115710861	protein_coding	NA	NA	NA	NA	NA	NA
0.00017694294073639056	NC_044372.1	55163601	55164999	+	56.3201	1398	Intergenic	Intergenic	-50698	LOC115709749	LOC115709749	XM_030637942	putative disease resistance protein At1g50180	protein_coding	4.69913208	9.47E-07	2.28E-05	5.11256522	1.83E-08	4.20E-07
1.1687259516954315e-07	NC_044372.1	31081601	31084199	+	56.3201	2598	Intergenic	Intergenic	24941	LOC115710617	LOC115710617	XM_030638973	uncharacterized LOC115710617	protein_coding	NA	NA	NA	NA	NA	NA
2.770562275011804e-05	NC_044379.1	23271401	23272999	+	56.3201	1598	Intergenic	Intergenic	104704	LOC115699940	LOC115699940	XM_030627487	uncharacterized LOC115699940	protein_coding	NA	NA	NA	NA	NA	NA
6.08340275081076e-12	NC_044377.1	8884201	8889199	+	56.3201	4998	Intergenic	Intergenic	-7977	LOC115724829	LOC115724829	XM_030654178	probable galactinol--sucrose galactosyltransferase 6,	protein_coding	0.755232474	1	1	0.440415029	1	1
0.00045178976480482295	NC_044378.1	38083001	38084599	+	56.3201	1598	Intergenic	Intergenic	57915	LOC115698027	LOC115698027	XR_004008021	uncharacterized LOC115698027	lncRNA	3.326751962	0.485942891	NA	3.914125128	0.382835663	1
0.0011647067915242107-4	NC_044374.1	68938401	68939399	+	56.3201	998	Intergenic	Intergenic	-6344	LOC115716898	LOC115716898	XM_030645814	putative pre-16S rRNA nuclease,	protein_coding	-0.024079649	1	1	-0.248798816	1	1
0.0011647067915242107	NC_044370.1	38228401	38229199	+	56.3201	798	Intergenic	Intergenic	-18641	LOC115710594	LOC115710594	XM_030638955	#N/A	protein_coding	-0.641208037	1	1	0.482413937	1	1
0.0011647067915242107-2	NC_044372.1	63218001	63218799	+	56.3201	798	Intergenic	Intergenic	-16761	LOC115710846	LOC115710846	XM_030639200	serine/arginine repetitive matrix protein 2-like	protein_coding	0.301624513	1	NA	1.850778641	0.833286398	NA
0.0011647067915242107-3	NC_044373.1	26721201	26721999	+	56.3201	798	Intergenic	Intergenic	41530	LOC115713292	LOC115713292	XM_030641771	uncharacterized LOC115713292	protein_coding	NA	NA	NA	NA	NA	NA
5.815416886514928e-10	NC_044372.1	52478001	52481599	+	56.2822	3598	Intergenic	Intergenic	26298	LOC115711402	LOC115711402	XM_030639736	glycosyltransferase BC10-like	protein_coding	NA	NA	NA	NA	NA	NA
4.862223691448186e-06	NC_044370.1	42846801	42848399	+	56.2476	1598	Intergenic	Intergenic	24309	LOC115711022	LOC115711022	XR_004010421	uncharacterized LOC115711022	lncRNA	NA	NA	NA	NA	NA	NA
9.357942029982959e-14	NC_044377.1	10871801	10877199	+	56.2429	5398	Intergenic	Intergenic	-21800	LOC115724534	LOC115724534	XM_030653836	uncharacterized protein DDB_G0289357,	protein_coding	3.330607191	0.073491645	0.416120734	2.358434311	0.221074271	1
1.2151098117902935e-05	NW_022060417.1	329401	331199	+	56.2403	1798	Intergenic	Intergenic	-206531	LOC115702073	LOC115702073	XR_004008791	#N/A	lncRNA	NA	NA	NA	NA	NA	NA
3.0488551420754852e-05	NC_044373.1	12557401	12558799	+	56.2313	1398	Intergenic	Intergenic	2688	LOC115712687	LOC115712687	XR_004010912	uncharacterized LOC115712687	lncRNA	0.989317056	1	1	-0.628568119	1	1
1.2110224803310422e-15	NC_044377.1	24469801	24475999	+	56.2313	6198	Intergenic	Intergenic	396352	LOC115695060	LOC115695060	XM_030622157	uncharacterized LOC115695060	protein_coding	NA	NA	NA	NA	NA	NA
0.00019498175353972532	NC_044375.1	10638801	10640399	+	56.2057	1598	Intergenic	Intergenic	64720	LOC115719847	LOC115719847	XM_030649033	uncharacterized LOC115719847	protein_coding	NA	NA	NA	NA	NA	NA
0.00019498175353972532-2	NC_044379.1	23274601	23275599	+	56.2057	998	Intergenic	Intergenic	107604	LOC115699940	LOC115699940	XM_030627487	uncharacterized LOC115699940	protein_coding	NA	NA	NA	NA	NA	NA
0.0004983358667262384-4	NC_044377.1	61295201	61296599	+	56.1864	1398	Intergenic	Intergenic	-8919	LOC115725634	LOC115725634	XM_030655214	protein OS-9 homolog	protein_coding	-0.152022495	1	1	-0.146876722	1	1
0.0004983358667262384	NC_044372.1	11309201	11310199	+	56.1864	998	Intergenic	Intergenic	24233	LOC115710419	LOC115710419	XM_030638783	uncharacterized LOC115710419	protein_coding	NA	NA	NA	NA	NA	NA
0.0004983358667262384-5	NC_044378.1	31255401	31256399	+	56.1864	998	Intergenic	Intergenic	-31481	LOC115697279	LOC115697279	XM_030624218	UDP-arabinose 4-epimerase 1,	protein_coding	0.026389832	1	1	0.180020007	1	1
0.0004983358667262384-2	NC_044372.1	32768401	32769799	+	56.1864	1398	Intergenic	Intergenic	-34176	LOC115710627	LOC115710627	XM_030638985	uncharacterized LOC115710627	protein_coding	NA	NA	NA	NA	NA	NA
0.0004983358667262384-3	NC_044374.1	53196001	53196999	+	56.1864	998	Intergenic	Intergenic	-80405	LOC115715990	LOC115715990	XM_030644677	eukaryotic translation initiation factor 2D,	protein_coding	-0.481413754	1	1	-0.159332061	1	1
5.345789913596384e-06	NC_044379.1	26328201	26329799	+	56.174	1598	exon	-exon (LOC115699963, exon 3 of 6)	798	LOC115699963	LOC115699963	XM_030627509	uncharacterized LOC115699963	protein_coding	2.684200477	0.669944938	NA	2.309797514	0.740283256	NA
1.882837159653073e-09	NC_044374.1	54945201	54948199	+	56.1592	2998	Intergenic	Intergenic	34396	LOC115715906	LOC115715906	XR_004011477	uncharacterized LOC115715906	lncRNA	NA	NA	NA	NA	NA	NA
0.0012863912364575179	NC_044370.1	29186001	29186799	+	56.1592	798	Intergenic	Intergenic	18637	LOC115709427	LOC115709427	XM_030637533	trihelix transcription factor GT-2	protein_coding	0.288136392	1	1	1.771308981	1.83E-05	0.000274909
1.5479631866689818e-07	NC_044370.1	57981401	57984199	+	56.1592	2798	Intergenic	Intergenic	-9676	LOC115722306	LOC115722306	XM_030651488	uncharacterized LOC115722306	protein_coding	NA	NA	NA	NA	NA	NA
1.3365118974387759e-05	NC_044374.1	74971201	74973799	+	56.1592	2598	Intergenic	Intergenic	10070	LOC115718191	LOC115718191	XR_004011776	small nucleolar RNA R71	snoRNA	NA	NA	NA	NA	NA	NA
0.0012863912364575179-2	NC_044373.1	66195401	66196199	+	56.1592	798	Intergenic	Intergenic	12199	LOC115713585	LOC115713585	XM_030642073	uncharacterized LOC115713585	protein_coding	NA	NA	NA	NA	NA	NA
0.0012863912364575179-3	NC_044374.1	44891201	44891999	+	56.1592	798	Intergenic	Intergenic	-43305	LOC115716934	LOC115716934	XM_030645860	homeobox protein BEL1 homolog,	protein_coding	-1.817372102	0.001214471	0.013700572	1.350457323	0.167135616	0.882641437
3.8283746507138526e-07-2	NC_044378.1	63445801	63447799	+	56.1475	1998	Intergenic	Intergenic	-22010	LOC115697230	LOC115697230	XR_004007918	uncharacterized LOC115697230	lncRNA	NA	NA	NA	NA	NA	NA
3.8283746507138526e-07	NC_044370.1	29240001	29242399	+	56.1475	2398	Intergenic	Intergenic	-36163	LOC115709427	LOC115709427	XM_030637533	trihelix transcription factor GT-2	protein_coding	0.288136392	1	1	1.771308981	1.83E-05	0.000274909
3.3551432450856074e-05	NC_044374.1	66382801	66384799	+	56.141	1998	Intergenic	Intergenic	17633	LOC115717916	LOC115717916	XM_030646883	uncharacterized LOC115717916	protein_coding	NA	NA	NA	NA	NA	NA
8.464567763028134e-05	NW_022060454.1	532801	534199	+	56.1182	1398	Intergenic	Intergenic	29342	LOC115702127	LOC115702127	XM_030629586	#N/A	protein_coding	-1.078418672	0.906335909	1	0.136444746	1	1
4.757509582603187e-12	NC_044375.1	38448801	38453599	+	56.1106	4798	Intergenic	Intergenic	-92389	LOC115721222	LOC115721222	XM_030650479	uncharacterized LOC115721222	protein_coding	-0.30087518	1	1	-0.209222848	1	1
5.070958924712187e-09	NC_044376.1	59343401	59345999	+	56.1074	2598	Intergenic	Intergenic	-4300	LOC115723213	LOC115723213	XM_030652649	syntaxin-related protein KNOLLE	protein_coding	3.011839762	0.040045712	0.2560874	0.199381466	1	1
1.6999621148154237e-07	NC_044377.1	56776601	56778399	+	56.1045	1798	Intergenic	Intergenic	-180273	LOC115695290	LOC115695290	XM_030622364	L10-interacting MYB domain-containing protein-like	protein_coding	NA	NA	NA	NA	NA	NA
0.0002148665418416372	NC_044371.1	25836601	25837799	+	56.0887	1198	Intergenic	Intergenic	-14778	LOC115707308	LOC115707308	XM_030635222	SNW/SKI-interacting protein A	protein_coding	-0.042033759	1	1	0.220422376	1	1
0.0002148665418416372-2	NC_044372.1	34879401	34880199	+	56.0887	798	Intergenic	Intergenic	-10309	LOC115711240	LOC115711240	XM_030639572	40S ribosomal protein S13	protein_coding	-0.131981732	1	1	-0.712885911	1	1
0.0005497056278386329	NC_044375.1	17440401	17441799	+	56.0492	1398	Intergenic	Intergenic	-34295	LOC115719684	LOC115719684	XM_030648820	tRNA threonylcarbamoyladenosine dehydratase,	protein_coding	0.058276312	1	1	0.432755063	1	1
0.0005497056278386329-2	NC_044377.1	73609601	73610599	+	56.0492	998	Intergenic	Intergenic	58393	LOC115724663	LOC115724663	XM_030654003	myosin-15,	protein_coding	0.410947537	1	NA	0.036563417	1	NA
2.5917400978438106e-06	NC_044373.1	43467801	43469599	+	56.0492	1798	Intergenic	Intergenic	222707	LOC115713438	LOC115713438	XM_030641921	uncharacterized LOC115713438	protein_coding	0	1	NA	-0.925217262	1	NA
3.6922471426806815e-05-4	NC_044377.1	1036001	1037399	+	56.0492	1398	Intergenic	Intergenic	37624	LOC115725183	LOC115725183	XM_030654616	putative disease resistance protein At3g14460	protein_coding	NA	NA	NA	NA	NA	NA
3.6922471426806815e-05	NC_044370.1	44780601	44782399	+	56.0492	1798	promoter-TSS	-promoter-TSS (LOC115720859)	-1379	LOC115720859	LOC115720859	XM_030650046	uncharacterized LOC115720859	protein_coding	0	1	NA	-0.925217262	1	NA
3.6922471426806815e-05-2	NC_044370.1	98513001	98514399	+	56.0492	1398	intron	-intron (LOC115699331, intron 13 of 19)	8669	LOC115699331	LOC115699331	XM_030626683	probable LRR receptor-like serine/threonine-protein kinase At5g37450	protein_coding	-0.126983977	1	1	-0.568855994	1	1
3.6922471426806815e-05-3	NC_044373.1	77861401	77863399	+	56.0492	1998	Intergenic	Intergenic	15508	LOC115713939	LOC115713939	XM_030642424	U-box domain-containing protein 30	protein_coding	-0.186136154	1	1	0.123658489	1	1
2.4875182769110118e-09	NC_044377.1	24658001	24662199	+	56.0353	4198	Intergenic	Intergenic	209152	LOC115695060	LOC115695060	XM_030622157	uncharacterized LOC115695060	protein_coding	NA	NA	NA	NA	NA	NA
2.4875182769110118e-09-2	NC_044377.1	37226601	37230199	+	56.0353	3598	Intergenic	Intergenic	-9475	LOC115696057	LOC115696057	XR_004007655	small nucleolar RNA R71	snoRNA	NA	NA	NA	NA	NA	NA
6.462039444519686e-06-2	NC_044371.1	98634401	98635999	+	56.0239	1598	intron	-intron (LOC115707848, intron 6 of 10)	1467	LOC115707848	LOC115707848	XM_030635930	sulfite exporter TauE/SafE family protein 3,	protein_coding	0.027245224	1	1	0.753813389	1	1
6.462039444519686e-06	NC_044371.1	4265401	4267199	+	56.0239	1798	Intergenic	Intergenic	20137	LOC115706723	LOC115706723	XM_030634444	40S ribosomal protein S20-2	protein_coding	-0.422122194	1	1	-0.847608452	1	1
6.462039444519686e-06-3	NC_044379.1	11405201	11406799	+	56.0239	1598	Intergenic	Intergenic	13944	LOC115698878	LOC115698878	XM_030626082	replication protein A 14 kDa subunit B	protein_coding	0.118163523	1	1	-2.226961248	0.000102658	0.001350438
9.320820953299534e-05	NC_044373.1	77575801	77576999	+	56.0144	1198	Intergenic	Intergenic	-4815	LOC115714752	LOC115714752	XM_030643509	NADH dehydrogenase [ubiquinone] iron-sulfur protein 4, mitochondrial	protein_coding	-0.227646318	1	1	0.04095372	1	1
0.0014209064072770315-3	NC_044372.1	15376201	15377599	+	55.9934	1398	Intergenic	Intergenic	-56734	LOC115710472	LOC115710472	XM_030638833	uncharacterized LOC115710472	protein_coding	1.167181664	0.936955752	NA	1.107319735	0.957624322	1
0.0014209064072770315-4	NC_044373.1	55005201	55006199	+	55.9934	998	Intergenic	Intergenic	-38465	LOC115713507	LOC115713507	XM_030641990	uncharacterized LOC115713507	protein_coding	NA	NA	NA	NA	NA	NA
0.0014209064072770315-2	NC_044371.1	89853401	89854199	+	55.9934	798	Intergenic	Intergenic	9680	LOC115707086	LOC115707086	XM_030634926	leucine-rich repeat extensin-like protein 3	protein_coding	0.41853231	1	1	0.246713	1	1
0.0014209064072770315-5	NC_044374.1	35188401	35189199	+	55.9934	798	Intergenic	Intergenic	119141	LOC115717713	LOC115717713	XM_030646693	uncharacterized LOC115717713	protein_coding	NA	NA	NA	NA	NA	NA
0.0014209064072770315	NC_044371.1	87824201	87824999	+	55.9934	798	Intergenic	Intergenic	4831	LOC115706677	LOC115706677	XM_030634390	cationic amino acid transporter 8, vacuolar	protein_coding	0.454999777	1	1	-0.873061894	1	1
2.8484991852024958e-06	NC_044375.1	85121401	85123799	+	55.9793	2398	Intergenic	Intergenic	-32018	LOC115718638	LOC115718638	XM_030647454	villin-1,	protein_coding	0.882231533	1	1	-0.15145679	1	1
6.701997363008529e-09	NC_044373.1	45801	48799	+	55.9756	2998	Intergenic	Intergenic	10480	LOC115714018	LOC115714018	XM_030642527	7-dehydrocholesterol reductase-like	protein_coding	-0.069184796	1	1	-0.493769659	1	1
6.701997363008529e-09-2	NC_044376.1	56214001	56216799	+	55.9756	2798	Intergenic	Intergenic	-16027	LOC115721928	LOC115721928	XM_030651033	probable potassium transporter 17	protein_coding	-1.130241789	0.730430604	1	-1.483717686	0.196027461	1
0.00023678702863469617-3	NC_044377.1	24462001	24463199	+	55.9693	1198	Intergenic	Intergenic	406652	LOC115695060	LOC115695060	XM_030622157	uncharacterized LOC115695060	protein_coding	NA	NA	NA	NA	NA	NA
0.00023678702863469617-2	NC_044374.1	10801601	10802799	+	55.9693	1198	Intergenic	Intergenic	-35971	LOC115717557	LOC115717557	XM_030646543	probable serine/threonine-protein kinase At1g01540	protein_coding	0.410947537	1	NA	0.998328082	1	NA
0.00023678702863469617-4	NC_044377.1	51686001	51686999	+	55.9693	998	Intergenic	Intergenic	47444	LOC115695696	LOC115695696	XR_004007530	uncharacterized LOC115695696,	lncRNA	0	1	NA	-0.925217262	1	NA
0.00023678702863469617	NC_044373.1	12799001	12800199	+	55.9693	1198	Intergenic	Intergenic	-13804	LOC115714982	LOC115714982	XM_030643757	glycine-rich RNA-binding protein	protein_coding	0.17960642	1	1	-0.397808604	1	1
7.10477442069475e-06	NC_044377.1	24641801	24643599	+	55.9472	1798	Intergenic	Intergenic	226552	LOC115695060	LOC115695060	XM_030622157	uncharacterized LOC115695060	protein_coding	NA	NA	NA	NA	NA	NA
1.7998682906732724e-15	NW_022060391.1	1	5199	+	55.9201	5198	NA	NA	NA	NA			#N/A		NA	NA	NA	NA	NA	NA
1.778535826174478e-05-2	NC_044377.1	27336601	27338199	+	55.9085	1598	Intergenic	Intergenic	22239	LOC115695072	LOC115695072	XM_030622166	uncharacterized LOC115695072	protein_coding	NA	NA	NA	NA	NA	NA
1.778535826174478e-05	NC_044371.1	81386001	81387999	+	55.9085	1998	Intergenic	Intergenic	46423	LOC115705982	LOC115705982	XM_030633470	stemmadenine O-acetyltransferase	protein_coding	4.18431025	1.30E-14	9.30E-13	4.714735933	1.61E-19	1.06E-17
1.8085527217134347e-08	NC_044374.1	85418601	85421399	+	55.9085	2798	Intergenic	Intergenic	-157296	LOC115716182	LOC115716182	XM_030644921	uncharacterized LOC115716182	protein_coding	2.012420156	0.009106107	0.074678623	-0.135857219	1	1
1.778535826174478e-05-3	NW_022060417.1	1285201	1286999	+	55.9085	1798	Intergenic	Intergenic	111531	LOC115702077	LOC115702077	XR_004008793	#N/A	snoRNA	NA	NA	NA	NA	NA	NA
0.0037253882045876962-2	NC_044375.1	56931601	56932199	+	55.9085	598	Intergenic	Intergenic	40848	LOC115720211	LOC115720211	XM_030649367	#N/A	protein_coding	1.183473783	0.963862446	NA	-1.406735347	0.917537053	NA
0.0037253882045876962	NC_044372.1	45440201	45440799	+	55.9085	598	Intergenic	Intergenic	-133473	LOC115710724	LOC115710724	XM_030639078	uncharacterized LOC115710724	protein_coding	NA	NA	NA	NA	NA	NA
3.1306942696860935e-06-2	NW_022060417.1	1023401	1025399	+	55.9085	1998	Intergenic	Intergenic	137118	LOC115702074	LOC115702074	XR_004008792	#N/A	lncRNA	NA	NA	NA	NA	NA	NA
0.0006064024295656371	NC_044372.1	60295201	60296199	+	55.9085	998	Intergenic	Intergenic	41760	LOC115710307	LOC115710307	XM_030638675	protein PLANT CADMIUM RESISTANCE 6	protein_coding	2.868491478	0.495268813	NA	2.494100798	0.585537457	NA
0.0006064024295656371-2	NC_044379.1	9358801	9359799	+	55.9085	998	Intergenic	Intergenic	-151082	LOC115699810	LOC115699810	XM_030627353	uncharacterized LOC115699810	protein_coding	NA	NA	NA	NA	NA	NA
0.0001026390404708144	NC_044370.1	77870201	77871999	+	55.9085	1798	Intergenic	Intergenic	-25114	LOC115717750	LOC115717750	XM_030646730	aspartyl protease AED3	protein_coding	4.905502218	NA	NA	-1.276169374	NA	NA
5.573368012993918e-07	NC_044371.1	86394601	86396799	+	55.9085	2198	Intergenic	Intergenic	-5968	LOC115707895	LOC115707895	XM_030635991	bifunctional L-3-cyanoalanine synthase/cysteine synthase 1, mitochondrial	protein_coding	-2.067464405	0.015032577	0.113188889	0.385451471	1	1
3.1306942696860935e-06	NC_044375.1	44573401	44575399	+	55.9085	1998	Intergenic	Intergenic	-135687	LOC115720120	LOC115720120	XM_030649281	uncharacterized LOC115720120	protein_coding	0.689331956	1	1	0.219661927	1	1
2.472475883167135e-07	NC_044373.1	39659801	39662199	+	55.8799	2398	intron	-intron (LOC115713411, intron 1 of 2)	351	LOC115713411	LOC115713411	XM_030641895	uncharacterized LOC115713411	protein_coding	0.951477275	1	NA	1.068535523	0.971405404	1
1.3829262737796437e-06	NC_044377.1	57734401	57737399	+	55.8755	2998	Intergenic	Intergenic	-2632	LOC115695300	LOC115695300	XM_030622375	uncharacterized LOC115695300	protein_coding	NA	NA	NA	NA	NA	NA
7.811458831584894e-06	NC_044372.1	52337601	52339799	+	55.8695	2198	Intergenic	Intergenic	-5805	LOC115708925	LOC115708925	XM_030636953	uncharacterized LOC115708925	protein_coding	0.944939363	1	1	0.747734963	1	1
3.605709388654771e-09	NC_044377.1	42886201	42889399	+	55.8656	3198	TTS	-TTS (LOC115695200)	1173	LOC115695200	LOC115695200	XM_030622285	uncharacterized LOC115695200	protein_coding	NA	NA	NA	NA	NA	NA
4.471636393161126e-05-3	NC_044375.1	37780801	37782799	+	55.8608	1998	intron	-intron (LOC115720858, intron 11 of 11)	-23028	LOC115720860	LOC115720860	XM_030650045	uncharacterized LOC115720860,	protein_coding	0.599629925	1	1	0.931351891	1	1
4.471636393161126e-05-2	NC_044372.1	2618401	2620199	+	55.8608	1798	Intergenic	Intergenic	8986	LOC115709199	LOC115709199	XM_030637257	putative FBD-associated F-box protein At5g53635	protein_coding	-3.745459454	0.384781561	1	0.99831927	1	1
4.471636393161126e-05	NC_044370.1	67409001	67411199	+	55.8608	2198	Intergenic	Intergenic	-72428	LOC115713581	LOC115713581	XM_030642072	protein SNOWY COTYLEDON 3	protein_coding	NA	NA	NA	NA	NA	NA
1.5261842879089335e-13	NC_044378.1	17534201	17539599	+	55.8548	5398	TTS	-TTS (LOC115696391)	1269	LOC115696391	LOC115696391	XM_030623292	uncharacterized LOC115696391	protein_coding	-3.636736779	0.114962017	0.589782455	-1.423834404	0.808243677	1
0.0002609525324086652-2	NC_044376.1	51962401	51964199	+	55.8471	1798	Intergenic	Intergenic	-28080	LOC115724351	LOC115724351	XR_004013147	small nucleolar RNA snoR109	snoRNA	NA	NA	NA	NA	NA	NA
0.0002609525324086652	NC_044374.1	54520401	54521799	+	55.8471	1398	Intergenic	Intergenic	-39323	LOC115717852	LOC115717852	XM_030646822	uncharacterized LOC115717852	protein_coding	NA	NA	NA	NA	NA	NA
0.0002609525324086652-3	NC_044379.1	1734201	1735599	+	55.8471	1398	Intergenic	Intergenic	-1054889	LOC115698919	LOC115698919	XM_030626122	extracellular ribonuclease LE	protein_coding	6.151631711	1.47E-17	1.49E-15	3.483828726	2.08E-15	9.58E-14
3.4408446995823747e-06	NC_044378.1	48446401	48448399	+	55.8368	1998	Intergenic	Intergenic	-15687	LOC115696617	LOC115696617	XM_030623511	uncharacterized LOC115696617	protein_coding	NA	NA	NA	NA	NA	NA
0.0015696207456148302-3	NC_044379.1	23145801	23146599	+	55.8224	798	Intergenic	Intergenic	-21296	LOC115699940	LOC115699940	XM_030627487	uncharacterized LOC115699940	protein_coding	NA	NA	NA	NA	NA	NA
1.9562834255260885e-05	NC_044372.1	14828001	14830399	+	55.8224	2398	TTS	-TTS (LOC115710468)	1326	LOC115710468	LOC115710468	XM_030638828	uncharacterized LOC115710468	protein_coding	NA	NA	NA	NA	NA	NA
0.0015696207456148302-2	NC_044373.1	77909801	77910599	+	55.8224	798	Intergenic	Intergenic	-8586	LOC115712459	LOC115712459	XM_030640731	uncharacterized LOC115712459,	protein_coding	2.268856349	0.383779375	1	-0.387314813	1	1
0.0015696207456148302	NC_044370.1	46075601	46076399	+	55.8224	798	Intergenic	Intergenic	31768	LOC115702462	LOC115702462	XM_030629911	putative lipid-transfer protein DIR1	protein_coding	NA	NA	NA	NA	NA	NA
0.0015696207456148302-4	NC_044379.1	33103401	33104199	+	55.8224	798	Intergenic	Intergenic	14920	LOC115700474	LOC115700474	XM_030628015	probable UDP-arabinopyranose mutase 2	protein_coding	-0.205286528	1	1	-1.170734232	0.696413709	1
3.313991569176816e-23	NC_044373.1	37011201	37020999	+	55.8135	9798	Intergenic	Intergenic	34697	LOC115712923	LOC115712923	XM_030641341	glutamate decarboxylase 5	protein_coding	3.060856015	0.004126644	0.038620486	2.450287971	0.04307132	0.290794333
0.00011302645873753546	NC_044374.1	31294201	31295999	+	55.8006	1798	Intergenic	Intergenic	140500	LOC115717703	LOC115717703	XM_030646683	hepatitis A virus cellular receptor 1-like	protein_coding	NA	NA	NA	NA	NA	NA
4.3409216799583944e-09	NC_044376.1	29840401	29843599	+	55.7788	3198	Intergenic	Intergenic	-18657	LOC115723748	LOC115723748	XM_030653225	uncharacterized LOC115723748	protein_coding	NA	NA	NA	NA	NA	NA
3.545722696857904e-10	NC_044377.1	44628601	44632399	+	55.7769	3798	promoter-TSS	-promoter-TSS (LOC115696160)	-809	LOC115696160	LOC115696160	XR_004007751	small nucleolar RNA R71	snoRNA	NA	NA	NA	NA	NA	NA
4.921103897081868e-05-3	NC_044379.1	21340001	21341399	+	55.7642	1398	Intergenic	Intergenic	43067	LOC115698728	LOC115698728	XM_030625874	uncharacterized endoplasmic reticulum membrane protein C16E8.02	protein_coding	-0.584392887	1	1	-1.032788667	0.874158406	1
0.000668982624624274	NC_044372.1	61959601	61960599	+	55.7642	998	Intergenic	Intergenic	4819	LOC115711226	LOC115711226	XR_004010435	uncharacterized LOC115711226,	lncRNA	NA	NA	NA	NA	NA	NA
4.921103897081868e-05	NC_044371.1	33124401	33125999	+	55.7642	1598	TTS	-TTS (LOC115703990)	328	LOC115706912	LOC115706912	XR_004009661	uncharacterized LOC115706912	lncRNA	NA	NA	NA	NA	NA	NA
2.9817049717246023e-07	NC_044370.1	38230201	38232999	+	55.7642	2798	Intergenic	Intergenic	-15841	LOC115710594	LOC115710594	XM_030638955	#N/A	protein_coding	-0.641208037	1	1	0.482413937	1	1
4.921103897081868e-05-2	NC_044372.1	85006801	85008599	+	55.7642	1798	Intergenic	Intergenic	22364	LOC115711040	LOC115711040	XM_030639377	ethylene-responsive transcription factor 5-like	protein_coding	3.343596982	2.73E-07	7.33E-06	1.462374007	0.236513903	1
0.000668982624624274-4	NC_044379.1	30837001	30837999	+	55.7642	998	intron	-intron (LOC115701330, intron 8 of 15)	9739	LOC115701330	LOC115701330	XM_030629093	nucleolar protein 10,	protein_coding	-0.226945248	1	1	-0.432904101	1	1
0.000668982624624274-2	NC_044377.1	44220001	44220999	+	55.7642	998	Intergenic	Intergenic	15480	LOC115724943	LOC115724943	XM_030654320	ubiquitin thioesterase OTU1,	protein_coding	-0.496454632	1	1	-0.204237474	1	1
0.000668982624624274-3	NC_044378.1	7364401	7365399	+	55.7642	998	Intergenic	Intergenic	-7496	TRNAQ-CUG_7	TRNAQ-CUG_7	TRNAQ-CUG_7	#N/A	tRNA	NA	NA	NA	NA	NA	NA
1.3243711824181469e-07	NC_044376.1	49329401	49332399	+	55.7459	2998	Intergenic	Intergenic	87943	LOC115724324	LOC115724324	XR_004013121	small nucleolar RNA R71	snoRNA	NA	NA	NA	NA	NA	NA
1.6694545633494823e-06	NC_044372.1	64187601	64189399	+	55.7416	1798	Intergenic	Intergenic	-20029	LOC115709278	LOC115709278	XM_030637341	DNAJ protein JJJ1 homolog,	protein_coding	-0.490815092	1	1	0.079803712	1	1
1.6694545633494823e-06-2	NC_044375.1	35759201	35762199	+	55.7416	2998	Intergenic	Intergenic	-45919	LOC115719335	LOC115719335	XR_004012146	uncharacterized LOC115719335	lncRNA	NA	NA	NA	NA	NA	NA
2.151809606662492e-05	NC_044370.1	76087801	76089799	+	55.7349	1998	Intergenic	Intergenic	21939	LOC115714667	LOC115714667	XM_030643421	putative oxidoreductase GLYR1	protein_coding	-0.583219389	1	1	-0.561021146	1	1
0.00028759400246287475	NC_044371.1	54687201	54688199	+	55.7222	998	Intergenic	Intergenic	-223773	LOC115704145	LOC115704145	XM_030631362	uncharacterized LOC115704145	protein_coding	NA	NA	NA	NA	NA	NA
0.00028759400246287475-2	NC_044375.1	15111601	15112599	+	55.7222	998	Intergenic	Intergenic	-13472	LOC115721444	LOC115721444	XR_004012467	small nucleolar RNA R71	snoRNA	NA	NA	NA	NA	NA	NA
3.27436662510292e-07-2	NC_044372.1	22314601	22317199	+	55.7054	2598	Intergenic	Intergenic	16639	LOC115711384	LOC115711384	XM_030639717	plant cysteine oxidase 3,	protein_coding	-0.493385032	1	1	-0.344418845	1	1
3.27436662510292e-07	NC_044371.1	5916601	5919399	+	55.7054	2798	Intergenic	Intergenic	-42457	LOC115707451	LOC115707451	XM_030635416	uncharacterized LOC115707451	protein_coding	-0.289022453	1	1	0.981449601	1	1
0.00012446775579798343-4	NC_044375.1	64361801	64363199	+	55.6906	1398	Intergenic	Intergenic	-13960	LOC115720918	LOC115720918	XM_030650126	photosystem II 5 kDa protein, chloroplastic	protein_coding	-0.800327965	1	1	1.116470942	0.700192399	1
0.00012446775579798343-5	NC_044376.1	22709601	22710799	+	55.6906	1198	Intergenic	Intergenic	21875	LOC115723338	LOC115723338	XM_030652781	E3 ubiquitin-protein ligase RMA1H1	protein_coding	0.067728221	1	1	-0.794166733	1	1
4.1563607962246495e-06	NC_044379.1	10547601	10549999	+	55.6906	2398	Intergenic	Intergenic	-50055	LOC115701598	LOC115701598	XR_004008592	small nucleolar RNA R71	snoRNA	NA	NA	NA	NA	NA	NA
0.00012446775579798343	NC_044371.1	22229401	22230399	+	55.6906	998	Intergenic	Intergenic	-23212	LOC115703890	LOC115703890	XM_030631127	protein FAR1-RELATED SEQUENCE 5-like	protein_coding	NA	NA	NA	NA	NA	NA
0.004123446104536469	NC_044374.1	53075801	53076399	+	55.6906	598	Intergenic	Intergenic	-32998	LOC115715815	LOC115715815	XM_030644486	zinc finger protein ZAT4	protein_coding	3.474185759	0.201588625	0.904560722	2.550842059	0.374351506	1
0.004123446104536469-2	NC_044375.1	72441801	72442399	+	55.6906	598	Intergenic	Intergenic	-8877	LOC115718551	LOC115718551	XM_030647352	ankyrin repeat-containing protein ITN1-like,	protein_coding	NA	NA	NA	NA	NA	NA
0.00012446775579798343-3	NC_044375.1	63728201	63729799	+	55.6906	1598	Intergenic	Intergenic	8738	LOC115720251	LOC115720251	XM_030649407	uncharacterized LOC115720251	protein_coding	NA	NA	NA	NA	NA	NA
0.00012446775579798343-2	NC_044372.1	83643001	83644199	+	55.6906	1198	Intergenic	Intergenic	3053	LOC115708955	LOC115708955	XR_004010113	uncharacterized LOC115708955	lncRNA	NA	NA	NA	NA	NA	NA
5.4158180476049726e-05	NC_044379.1	9446601	9448399	+	55.6658	1798	Intergenic	Intergenic	-62882	LOC115699810	LOC115699810	XM_030627353	uncharacterized LOC115699810	protein_coding	NA	NA	NA	NA	NA	NA
8.113203125063493e-07	NC_044370.1	49847201	49848999	+	55.6588	1798	exon	-exon (LOC115721323, exon 1 of 1)	725	LOC115721323	LOC115721323	XM_030650597	uncharacterized LOC115721323	protein_coding	0.42574027	1	1	-2.27200243	0.647354272	1
2.3668939081702382e-05	NC_044374.1	41508201	41509799	+	55.646	1598	Intergenic	Intergenic	-58358	LOC115716678	LOC115716678	XM_030645530	#N/A	protein_coding	1.18742956	0.257346226	1	0.235594073	1	1
2.3668939081702382e-05-2	NC_044377.1	13954401	13955999	+	55.646	1598	Intergenic	Intergenic	38873	LOC115694994	LOC115694994	XM_030622093	transcription factor MYB44-like	protein_coding	-0.294556318	1	1	-0.561915578	1	1
0.0017340507480452605-3	NC_044370.1	50600001	50600799	+	55.646	798	Intergenic	Intergenic	7526	LOC115702478	LOC115702478	XM_030629921	uncharacterized LOC115702478	protein_coding	5.834025369	0.00782842	0.065771732	6.421422231	0.002858626	0.02773884
2.3668939081702382e-05-3	NC_044379.1	15282201	15284199	+	55.646	1998	Intergenic	Intergenic	-30472	LOC115700615	LOC115700615	XM_030628222	peptidyl-prolyl cis-trans isomerase CYP23,	protein_coding	0.66703276	1	1	-0.259137089	1	1
0.0017340507480452605-6	NC_044377.1	59084401	59085199	+	55.646	798	intron	-intron (LOC115695307, intron 1 of 2)	45846	LOC115695308	LOC115695308	XM_030622383	uncharacterized LOC115695308	protein_coding	NA	NA	NA	NA	NA	NA
0.0017340507480452605-4	NC_044372.1	57308601	57309399	+	55.646	798	Intergenic	Intergenic	42428	LOC115711795	LOC115711795	XR_004010669	small nucleolar RNA R71	snoRNA	NA	NA	NA	NA	NA	NA
0.0017340507480452605-2	NC_044370.1	33963201	33963999	+	55.646	798	Intergenic	Intergenic	-43065	LOC115710185	LOC115710185	XM_030638531	elongation factor 1-delta 1	protein_coding	-0.210789203	1	1	-0.324216572	1	1
3.5957327816477323e-07	NC_044371.1	51724001	51726399	+	55.646	2398	Intergenic	Intergenic	139103	LOC115705418	LOC115705418	XR_004009460	uncharacterized LOC115705418	lncRNA	NA	NA	NA	NA	NA	NA
0.0017340507480452605-5	NC_044374.1	20947601	20948399	+	55.646	798	Intergenic	Intergenic	8363	LOC115716525	LOC115716525	XM_030645335	probable plastid-lipid-associated protein 3, chloroplastic	protein_coding	-1.221755586	0.2462448	1	0.755437665	1	1
0.0017340507480452605	NC_044370.1	5841401	5842199	+	55.646	798	Intergenic	Intergenic	-10973	LOC115703143	LOC115703143	XM_030630642	#N/A	protein_coding	-0.036812084	1	1	-0.100461478	1	1
7.098778103821647e-08	NC_044370.1	38349601	38352199	+	55.6249	2598	Intergenic	Intergenic	103459	LOC115710594	LOC115710594	XM_030638955	#N/A	protein_coding	-0.641208037	1	1	0.482413937	1	1
0.0007380611674445842	NC_044371.1	14530201	14531199	+	55.616	998	Intergenic	Intergenic	-16298	LOC115704784	LOC115704784	XM_030631993	uncharacterized LOC115704784,	protein_coding	0.048518388	1	NA	1.563430347	0.821436628	NA
4.56811343183736e-06	NC_044370.1	46145601	46147599	+	55.616	1998	Intergenic	Intergenic	9481	LOC115711365	LOC115711365	XM_030639703	importin-4	protein_coding	-0.175896135	1	1	-0.818259215	1	1
0.0003169662669619376-3	NC_044379.1	45772401	45773399	+	55.5945	998	Intergenic	Intergenic	101995	LOC115700161	LOC115700161	XM_030627721	uncharacterized LOC115700161	protein_coding	NA	NA	NA	NA	NA	NA
0.0003169662669619376	NC_044373.1	20582401	20583599	+	55.5945	1198	Intergenic	Intergenic	15839	LOC115713042	LOC115713042	XM_030641517	uncharacterized LOC115713042	protein_coding	1.392754899	0.193466354	0.877951774	1.782227286	0.009512247	0.079619536
0.0003169662669619376-2	NC_044379.1	10305601	10306999	+	55.5945	1398	Intergenic	Intergenic	10674	LOC115701341	LOC115701341	XM_030629110	uncharacterized LOC115701341	protein_coding	-1.259328222	0.150265905	0.725037239	0.568723639	1	1
0.00013707014720025875	NC_044378.1	14107401	14108599	+	55.5784	1198	Intergenic	Intergenic	32423	LOC115696363	LOC115696363	XM_030623264	uncharacterized LOC115696363	protein_coding	NA	NA	NA	NA	NA	NA
5.960340706263916e-05-4	NC_044379.1	54252801	54254599	+	55.5658	1798	TTS	-TTS (LOC115701610)	955	LOC115701610	LOC115701610	XR_004008603	small nucleolar RNA R71	snoRNA	NA	NA	NA	NA	NA	NA
5.960340706263916e-05	NC_044371.1	73004201	73005599	+	55.5658	1398	Intergenic	Intergenic	-24510	LOC115705647	LOC115705647	XM_030633048	uncharacterized LOC115705647	protein_coding	3.606082054	1.45E-06	3.36E-05	-1.595719793	0.18265766	0.949549084
5.960340706263916e-05-2	NC_044372.1	71616801	71618399	+	55.5658	1598	Intergenic	Intergenic	-14616	LOC115709735	LOC115709735	XM_030637919	protein MLP2,	protein_coding	-0.650446016	1	1	-0.326412473	1	1
5.960340706263916e-05-3	NC_044378.1	48453601	48454999	+	55.5658	1398	Intergenic	Intergenic	-22587	LOC115696617	LOC115696617	XM_030623511	uncharacterized LOC115696617	protein_coding	NA	NA	NA	NA	NA	NA
2.0674929451291403e-12	NC_044374.1	20264201	20269399	+	55.5557	5198	intron	-intron (LOC115717633, intron 1 of 1)	5308	LOC115717633	LOC115717633	XM_030646617	uncharacterized LOC115717633	protein_coding	NA	NA	NA	NA	NA	NA
1.1414853282573237e-05	NC_044370.1	59694801	59696399	+	55.5474	1598	Intergenic	Intergenic	15113	LOC115722700	LOC115722700	XM_030651982	uncharacterized LOC115722700	protein_coding	NA	NA	NA	NA	NA	NA
5.020652256566081e-06	NC_044372.1	61659401	61662199	+	55.5405	2798	Intergenic	Intergenic	-24421	LOC115709814	LOC115709814	XM_030638044	formin-like protein 20,	protein_coding	0.205600083	1	1	0.150370862	1	1
4.336104668361615e-07	NC_044375.1	40884601	40887799	+	55.5253	3198	Intergenic	Intergenic	-6718	LOC115718887	LOC115718887	XR_004012079	uncharacterized LOC115718887	lncRNA	NA	NA	NA	NA	NA	NA
1.0195915582748252e-12	NC_044377.1	24760601	24764999	+	55.5233	4398	Intergenic	Intergenic	106452	LOC115695060	LOC115695060	XM_030622157	uncharacterized LOC115695060	protein_coding	NA	NA	NA	NA	NA	NA
8.553415532501219e-08	NC_044372.1	81630801	81633599	+	55.5181	2798	promoter-TSS	-promoter-TSS (LOC115711736)	-894	LOC115711736	LOC115711736	XR_004010615	small nucleolar RNA R71	snoRNA	NA	NA	NA	NA	NA	NA
0.00034935051612837296	NC_044371.1	55203801	55204999	+	55.4639	1198	Intergenic	Intergenic	281535	LOC115707541	LOC115707541	XM_030635546	tRNA:m(4)X modification enzyme TRM13,	protein_coding	-0.377874846	1	1	-0.385378342	1	1
0.0008143178503340608	NC_044374.1	68387001	68387799	+	55.4639	798	Intergenic	Intergenic	-3706	LOC115715855	LOC115715855	XM_030644521	LIM domain-containing protein WLIM2a,	protein_coding	3.059953834	0.014303962	0.108510287	3.294448949	0.006260364	0.055409437
1.075169809465107e-06	NC_044377.1	51964201	51966799	+	55.4639	2598	Intergenic	Intergenic	61214	LOC115695623	LOC115695623	XR_004007510	uncharacterized LOC115695623	lncRNA	NA	NA	NA	NA	NA	NA
1.255039310794146e-05	NC_044372.1	19141001	19142599	+	55.4639	1598	intron	-intron (LOC115711448, intron 1 of 2)	702	LOC115711448	LOC115711448	XR_004010492	uncharacterized LOC115711448	lncRNA	NA	NA	NA	NA	NA	NA
5.518016113433756e-06	NW_022060454.1	868001	869999	+	55.4639	1998	Intergenic	Intergenic	364842	LOC115702127	LOC115702127	XM_030629586	#N/A	protein_coding	-1.078418672	0.906335909	1	0.136444746	1	1
2.8637640045963743e-05	NC_044370.1	20790201	20792399	+	55.4639	2198	Intergenic	Intergenic	-18599	LOC115705927	LOC115705927	XM_030633407	peptidyl-tRNA hydrolase 2, mitochondrial	protein_coding	-0.658645354	1	1	-0.132628625	1	1
1.255039310794146e-05-2	NC_044374.1	41503401	41505199	+	55.4639	1798	Intergenic	Intergenic	-63058	LOC115716678	LOC115716678	XM_030645530	#N/A	protein_coding	1.18742956	0.257346226	1	0.235594073	1	1
2.8637640045963743e-05-3	NC_044379.1	36655801	36657599	+	55.4639	1798	intron	-intron (LOC115698693, intron 6 of 6)	14951	LOC115698693	LOC115698693	XM_030625834	uncharacterized LOC115698693	protein_coding	-0.224023462	1	1	0.180708744	1	1
0.0019158772778390847-3	NC_044376.1	41466001	41467199	+	55.4639	1198	Intergenic	Intergenic	-14718	LOC115722123	LOC115722123	XM_030651247	stem-specific protein TSJT1	protein_coding	0.309897029	1	1	-0.176283064	1	1
2.8637640045963743e-05-2	NC_044370.1	21860601	21861799	+	55.4639	1198	Intergenic	Intergenic	-14258	LOC115706519	LOC115706519	XR_004009598	uncharacterized LOC115706519	lncRNA	NA	NA	NA	NA	NA	NA
0.0019158772778390847	NC_044370.1	28475401	28475999	+	55.4639	598	Intergenic	Intergenic	-31795	LOC115709185	LOC115709185	XM_030637236	protein FLOWERING LOCUS T	protein_coding	-2.706240211	0.000413651	0.005457522	6.573177788	3.16E-27	3.67E-25
0.00034935051612837296-2	NC_044375.1	27295801	27296999	+	55.4639	1198	promoter-TSS	-promoter-TSS (LOC115721557)	-1720	LOC115721557	LOC115721557	XR_004012572	small nucleolar RNA R71	snoRNA	NA	NA	NA	NA	NA	NA
0.0019158772778390847-2	NC_044373.1	72524601	72525399	+	55.4639	798	Intergenic	Intergenic	6981	LOC115712714	LOC115712714	XM_030641051	mitochondrial uncoupling protein 5	protein_coding	-0.543301411	1	1	-1.771907305	0.02693543	0.19520732
6.55969436286929e-05	NC_044372.1	51384001	51385399	+	55.4639	1398	Intergenic	Intergenic	93328	LOC115709149	LOC115709149	XM_030637183	UPF0481 protein At3g47200	protein_coding	2.293764971	0.74473371	NA	1.919365176	0.81702512	NA
0.004564719848794841-2	NC_044375.1	66489201	66489799	+	55.4639	598	Intergenic	Intergenic	-8460	LOC115720273	LOC115720273	XM_030649429	putative disease resistance protein RGA4	protein_coding	0.410947537	1	NA	0.998328082	1	NA
0.000150951787979866	NC_044372.1	73852601	73853599	+	55.4639	998	Intergenic	Intergenic	-47984	LOC115708799	LOC115708799	XR_004010078	uncharacterized LOC115708799	lncRNA	3.202666113	0.055255268	0.330585749	4.483868833	0.00563731	0.050486438
0.004564719848794841-3	NC_044379.1	38583201	38583799	+	55.4639	598	Intergenic	Intergenic	-21459	LOC115699355	LOC115699355	XM_030626712	protein PHYLLO, chloroplastic,	protein_coding	-0.211677906	1	1	-0.030561853	1	1
0.000150951787979866-2	NC_044375.1	7365601	7366399	+	55.4639	798	Intergenic	Intergenic	-3714	LOC115719755	LOC115719755	XM_030648937	serine/threonine-protein kinase TOUSLED,	protein_coding	0.358306466	1	1	-0.205951029	1	1
0.004564719848794841	NC_044372.1	32424601	32425199	+	55.4639	598	Intergenic	Intergenic	-29335	LOC115709312	LOC115709312	XM_030637387	isocitrate dehydrogenase [NAD] catalytic subunit 5, mitochondrial,	protein_coding	-0.649657674	1	1	-0.129961164	1	1
7.330953136784383e-11	NC_044375.1	72497801	72501999	+	55.4282	4198	Intergenic	Intergenic	48923	LOC115718551	LOC115718551	XM_030647352	ankyrin repeat-containing protein ITN1-like,	protein_coding	NA	NA	NA	NA	NA	NA
9.115848659024424e-09	NC_044377.1	43991001	43994599	+	55.4175	3598	Intergenic	Intergenic	-111232	LOC115695668	LOC115695668	XM_030622727	uncharacterized protein At1g66480	protein_coding	-0.071708717	1	1	-3.239340754	1.77E-07	3.64E-06
4.58592143602981e-08	NC_044375.1	510401	513599	+	55.4123	3198	Intergenic	Intergenic	-10030	LOC115719090	LOC115719090	XM_030648001	uncharacterized LOC115719090	protein_coding	NA	NA	NA	NA	NA	NA
5.22878950082133e-07	NW_022060487.1	685001	687399	+	55.4019	2398	NA	NA	NA	NA			#N/A		NA	NA	NA	NA	NA	NA
1.1809573516231147e-06	NC_044377.1	56756201	56758599	+	55.3975	2398	Intergenic	Intergenic	-160173	LOC115695290	LOC115695290	XM_030622364	L10-interacting MYB domain-containing protein-like	protein_coding	NA	NA	NA	NA	NA	NA
8.931611772291097e-10	NC_044373.1	42117401	42120799	+	55.3829	3398	Intergenic	Intergenic	-5708	LOC115713431	LOC115713431	XM_030641911	uncharacterized mitochondrial protein AtMg00810-like	protein_coding	NA	NA	NA	NA	NA	NA
1.0001294781842758e-08	NC_044372.1	56643201	56645199	+	55.3707	1998	Intergenic	Intergenic	10761	LOC115711509	LOC115711509	XM_030639855	kinesin-like protein KIN-8A	protein_coding	3.322296676	0.017400827	0.128159427	1.265588964	0.733044984	1
3.150073208246915e-05	NC_044370.1	14570601	14572799	+	55.3707	2198	Intergenic	Intergenic	-11042	LOC115703721	LOC115703721	XM_030630956	fatty-acid-binding protein 1	protein_coding	-0.01977765	1	1	0.023056684	1	1
3.150073208246915e-05-2	NC_044370.1	24214601	24215999	+	55.3707	1398	exon	-exon (LOC115718967, exon 4 of 6)	1386	LOC115718967	LOC115718967	XM_030647800	uncharacterized LOC115718967	protein_coding	-1.512629836	0.90002605	NA	-0.925225269	1	NA
7.219408710288864e-05	NC_044373.1	5700201	5701999	+	55.3602	1798	Intergenic	Intergenic	-5503	LOC115713978	LOC115713978	XM_030642475	lysM domain receptor-like kinase 3	protein_coding	-0.940878101	1	1	0.176823895	1	1
7.219408710288864e-05-2	NC_044377.1	7010001	7011799	+	55.3602	1798	Intergenic	Intergenic	-4545	LOC115696161	LOC115696161	XR_004007752	small nucleolar RNA R71	snoRNA	NA	NA	NA	NA	NA	NA
0.00016624289227972822-2	NC_044379.1	9011001	9012199	+	55.3472	1198	Intergenic	Intergenic	-97780	LOC115699809	LOC115699809	XM_030627352	uncharacterized LOC115699809	protein_coding	NA	NA	NA	NA	NA	NA
0.00016624289227972822	NC_044374.1	66327401	66328599	+	55.3472	1198	Intergenic	Intergenic	21611	LOC115717915	LOC115717915	XM_030646882	uncharacterized LOC115717915	protein_coding	NA	NA	NA	NA	NA	NA
1.2971465237904494e-06	NC_044370.1	29605001	29606999	+	55.3303	1998	Intergenic	Intergenic	-27517	LOC115719596	LOC115719596	XM_030648696	uncharacterized LOC115719596	protein_coding	NA	NA	NA	NA	NA	NA
0.00038505704534026785	NC_044374.1	60416601	60417999	+	55.3303	1398	Intergenic	Intergenic	-38855	LOC115717877	LOC115717877	XM_030646848	uncharacterized LOC115717877	protein_coding	NA	NA	NA	NA	NA	NA
0.00038505704534026785-2	NC_044375.1	55783801	55785399	+	55.3303	1598	promoter-TSS	-promoter-TSS (LOC115720206)	651	LOC115720207	LOC115720207	XM_030649363	uncharacterized LOC115720207	protein_coding	NA	NA	NA	NA	NA	NA
0.00038505704534026785-3	NC_044376.1	12699201	12700199	+	55.3303	998	Intergenic	Intergenic	19751	LOC115722058	LOC115722058	XM_030651174	uncharacterized LOC115722058	protein_coding	7.648837871	4.83E-07	1.24E-05	8.236239718	4.31E-08	9.46E-07
1.2971465237904494e-06-2	NC_044378.1	21682801	21685199	+	55.3303	2398	Intergenic	Intergenic	38367	LOC115696423	LOC115696423	XM_030623325	uncharacterized LOC115696423	protein_coding	NA	NA	NA	NA	NA	NA
2.9367660557449813e-06	NC_044376.1	21258201	21259799	+	55.3199	1598	Intergenic	Intergenic	-27259	LOC115721873	LOC115721873	XM_030650965	purple acid phosphatase 2,	protein_coding	-0.278169782	1	1	1.190120614	0.733951112	1
0.0008985042115081093	NC_044370.1	90136001	90137199	+	55.3077	1198	Intergenic	Intergenic	-57600	LOC115695058	LOC115695058	XM_030622156	protein FAR-RED IMPAIRED RESPONSE 1-like	protein_coding	NA	NA	NA	NA	NA	NA
0.0008985042115081093-2	NC_044371.1	67863001	67863799	+	55.3077	798	Intergenic	Intergenic	4565	LOC115704276	LOC115704276	XM_030631491	uncharacterized LOC115704276	protein_coding	NA	NA	NA	NA	NA	NA
1.5171687397179805e-05	NC_044379.1	42091801	42093599	+	55.2933	1798	Intergenic	Intergenic	-7223	LOC115700119	LOC115700119	XM_030627680	receptor like protein 22	protein_coding	6.583276979	8.20E-09	2.80E-07	6.178524509	1.64E-11	5.32E-10
0.002116963715893467-2	NC_044378.1	55931601	55932399	+	55.276	798	Intergenic	Intergenic	3480	LOC115696663	LOC115696663	XM_030623553	uncharacterized LOC115696663	protein_coding	NA	NA	NA	NA	NA	NA
0.002116963715893467-3	NW_022060400.1	11201	11999	+	55.276	798	Intergenic	Intergenic	5062	LOC115702051	LOC115702051	XR_004008784	#N/A	snoRNA	NA	NA	NA	NA	NA	NA
0.002116963715893467	NC_044372.1	72262201	72263199	+	55.276	998	Intergenic	Intergenic	9446	LOC115710902	LOC115710902	XM_030639253	uncharacterized LOC115710902	protein_coding	NA	NA	NA	NA	NA	NA
1.424759137112641e-06	NC_044374.1	77187601	77189799	+	55.2623	2198	Intergenic	Intergenic	361342	LOC115718006	LOC115718006	XM_030646974	uncharacterized LOC115718006	protein_coding	0.410947537	1	NA	0.998328082	1	NA
1.424759137112641e-06-2	NC_044379.1	1597801	1599999	+	55.2623	2198	Intergenic	Intergenic	-1186097	LOC115698860	LOC115698860	XM_030626068	amino acid transporter AVT1I	protein_coding	-3.391531314	0.001859284	0.019698994	-1.423663466	0.584848218	1
2.3392555546787014e-11	NC_044375.1	2779001	2783399	+	55.2623	4398	promoter-TSS	-promoter-TSS (LOC115721295)	1112	LOC115719772	LOC115719772	XM_030648960	uncharacterized LOC115719772	protein_coding	NA	NA	NA	NA	NA	NA
7.945571933352363e-05	NC_044378.1	7325401	7326799	+	55.2547	1398	intron	-intron (LOC115698101, intron 1 of 3)	1510	LOC115698101	LOC115698101	XM_030625276	uncharacterized LOC115698101,	protein_coding	0.51503006	1	1	-0.197136266	1	1
6.061551170446925e-08	NC_044374.1	65978801	65981799	+	55.2547	2998	Intergenic	Intergenic	28166	LOC115718305	LOC115718305	XR_004011885	small nucleolar RNA R71	snoRNA	NA	NA	NA	NA	NA	NA
1.3629120671954273e-07	NC_044377.1	24457001	24459399	+	55.2421	2398	Intergenic	Intergenic	411052	LOC115695060	LOC115695060	XM_030622157	uncharacterized LOC115695060	protein_coding	NA	NA	NA	NA	NA	NA
0.005054000260708644	NC_044372.1	70915201	70915799	+	55.228	598	Intergenic	Intergenic	-3497	LOC115708858	LOC115708858	XM_030636875	uncharacterized LOC115708858	protein_coding	2.265827353	6.66E-07	1.66E-05	2.832541318	5.86E-13	2.22E-11
0.00018308696791307402	NC_044375.1	33070401	33071599	+	55.228	1198	Intergenic	Intergenic	-64255	LOC115720035	LOC115720035	XM_030649200	uncharacterized LOC115720035	protein_coding	NA	NA	NA	NA	NA	NA
0.00018308696791307402-3	NW_022060417.1	933401	934799	+	55.228	1398	Intergenic	Intergenic	46818	LOC115702074	LOC115702074	XR_004008792	#N/A	lncRNA	NA	NA	NA	NA	NA	NA
0.00018308696791307402-2	NC_044377.1	42996001	42997199	+	55.228	1198	Intergenic	Intergenic	63619	LOC115695201	LOC115695201	XM_030622286	uncharacterized LOC115695201	protein_coding	NA	NA	NA	NA	NA	NA
7.325682979132543e-06	NC_044370.1	77183801	77185599	+	55.228	1798	Intergenic	Intergenic	34536	LOC115724971	LOC115724971	XM_030654362	uncharacterized LOC115724971	protein_coding	NA	NA	NA	NA	NA	NA
0.005054000260708644-2	NC_044378.1	69841201	69841799	+	55.228	598	Intergenic	Intergenic	-9072	LOC115698195	LOC115698195	XM_030625382	putative disease resistance protein RGA3	protein_coding	-1.128147585	0.725969213	1	0.522527303	1	1
1.6681047927963466e-05-2	NC_044379.1	61517001	61518799	+	55.2061	1798	promoter-TSS	-promoter-TSS (LOC115699283)	-1262	LOC115699283	LOC115699283	XR_004008330	uncharacterized LOC115699283	lncRNA	NA	NA	NA	NA	NA	NA
1.6681047927963466e-05	NC_044372.1	55547001	55548599	+	55.2061	1598	Intergenic	Intergenic	36446	LOC115710780	LOC115710780	XM_030639130	uncharacterized LOC115710780	protein_coding	NA	NA	NA	NA	NA	NA
0.0004244282855305548-2	NC_044372.1	59610601	59611999	+	55.1935	1398	Intergenic	Intergenic	82859	LOC115710816	LOC115710816	XM_030639167	protein FAR1-RELATED SEQUENCE 5-like	protein_coding	NA	NA	NA	NA	NA	NA
0.0004244282855305548	NC_044370.1	67967201	67968399	+	55.1935	1198	Intergenic	Intergenic	7718	LOC115723643	LOC115723643	XM_030653130	uncharacterized LOC115723643	protein_coding	NA	NA	NA	NA	NA	NA
0.0004244282855305548-4	NC_044378.1	47745001	47746599	+	55.1935	1598	Intergenic	Intergenic	-110047	LOC115698399	LOC115698399	XR_004008148	small nucleolar RNA R71	snoRNA	NA	NA	NA	NA	NA	NA
0.0004244282855305548-3	NC_044375.1	51846201	51847399	+	55.1935	1198	Intergenic	Intergenic	-12866	LOC115719657	LOC115719657	XM_030648777	gamma-tubulin complex component 2	protein_coding	0.457161691	1	1	-0.285538549	1	1
1.4489407638641027e-08	NW_022060485.1	15401	18199	+	55.1797	2798	Intergenic	Intergenic	-59683	LOC115702201	LOC115702201	XM_030629650	#N/A	protein_coding	NA	NA	NA	NA	NA	NA
3.81149820250475e-05	NC_044375.1	13864401	13865799	+	55.1797	1398	Intergenic	Intergenic	31742	LOC115719871	LOC115719871	XM_030649051	zinc finger MYM-type protein 1-like	protein_coding	NA	NA	NA	NA	NA	NA
1.3781648335297516e-12	NC_044375.1	86978801	86984199	+	55.1675	5398	intron	-intron (LOC115718955, intron 3 of 3)	-7068	LOC115718956	LOC115718956	XR_004012101	uncharacterized LOC115718956	lncRNA	-2.216459821	0.272645305	1	-1.5004242	0.653816336	1
3.1149236349747394e-10	NC_044371.1	43539601	43543199	+	55.1602	3598	Intergenic	Intergenic	16962	LOC115708324	LOC115708324	XM_030636565	ATP synthase subunit alpha, chloroplastic	protein_coding	-0.715525804	1	1	0.815220211	1	1
7.3002081662835e-08	NC_044373.1	51035801	51038799	+	55.1472	2998	Intergenic	Intergenic	734922	LOC115712922	LOC115712922	XM_030641340	FCS-Like Zinc finger 5	protein_coding	-1.294019044	0.374949082	1	0.528287501	1	1
8.744887189210846e-05	NC_044377.1	43987601	43989399	+	55.1472	1798	Intergenic	Intergenic	-115532	LOC115695668	LOC115695668	XM_030622727	uncharacterized protein At1g66480	protein_coding	-0.071708717	1	1	-3.239340754	1.77E-07	3.64E-06
3.377784132571966e-11	NC_044375.1	56822001	56826399	+	55.1239	4398	Intergenic	Intergenic	86476	LOC115720210	LOC115720210	XM_030649366	zinc finger BED domain-containing protein RICESLEEPER 2	protein_coding	0.787565129	1	1	-0.424479101	1	1
1.8340597055522942e-05	NC_044374.1	63132801	63134399	+	55.1175	1598	Intergenic	Intergenic	5392	LOC115717893	LOC115717893	XM_030646862	uncharacterized LOC115717893	protein_coding	NA	NA	NA	NA	NA	NA
3.6991362466838515e-07	NC_044377.1	61271601	61273799	+	55.1064	2198	Intergenic	Intergenic	14281	LOC115725634	LOC115725634	XM_030655214	protein OS-9 homolog	protein_coding	-0.152022495	1	1	-0.146876722	1	1
0.00020164217770258637	NC_044372.1	11932801	11934199	+	55.1064	1398	Intergenic	Intergenic	10378	LOC115711256	LOC115711256	XM_030639594	uncharacterized LOC115711256	protein_coding	-0.73686314	1	1	0.804902656	1	1
0.00020164217770258637-2	NC_044375.1	54189601	54190799	+	55.1064	1198	Intergenic	Intergenic	-169262	LOC115720200	LOC115720200	XM_030649356	uncharacterized LOC115720200	protein_coding	NA	NA	NA	NA	NA	NA
7.626129961723103e-10	NC_044370.1	44434201	44438999	+	55.1064	4798	Intergenic	Intergenic	-7949	LOC115711182	LOC115711182	XM_030639513	cyclin-D3-3	protein_coding	1.299093184	0.47689422	1	-0.147377047	1	1
0.002339376164413929	NC_044374.1	61948401	61949199	+	55.0818	798	Intergenic	Intergenic	-68982	LOC115717886	LOC115717886	XM_030646856	uncharacterized mitochondrial protein AtMg00310-like	protein_coding	0	1	NA	-1.742002822	0.854499492	NA
4.1926372784317675e-05	NC_044375.1	87090801	87092399	+	55.0818	1598	Intergenic	Intergenic	-13540	LOC115719329	LOC115719329	XM_030648317	delta(12)-fatty-acid desaturase FAD2	protein_coding	9.606980007	2.22E-67	3.56E-64	6.335471361	6.15E-42	1.63E-39
8.848875520899634e-06-3	NC_044378.1	48106001	48107999	+	55.0653	1998	Intergenic	Intergenic	-27706	LOC115696946	LOC115696946	XR_004007835	uncharacterized LOC115696946, 1	lncRNA	-0.625387096	1	1	-0.189194205	1	1
8.848875520899634e-06-2	NC_044372.1	23333801	23335799	+	55.0653	1998	Intergenic	Intergenic	46341	LOC115708907	LOC115708907	XR_004010104	uncharacterized LOC115708907	lncRNA	NA	NA	NA	NA	NA	NA
8.848875520899634e-06	NC_044370.1	77775201	77776799	+	55.0653	1598	Intergenic	Intergenic	-10058	LOC115717605	LOC115717605	XM_030646589	universal stress protein PHOS34,	protein_coding	0.057552165	1	1	-0.246680234	1	1
2.2344627425819842e-17	NC_044378.1	34286201	34292199	+	55.0565	5998	Intergenic	Intergenic	-65562	LOC115698290	LOC115698290	XM_030625504	organelle RRM domain-containing protein 6, chloroplastic	protein_coding	-0.98410267	1	1	-0.011629265	1	1
0.00046784215119372426	NC_044373.1	16076801	16077999	+	55.0535	1198	Intergenic	Intergenic	-10957	LOC115712602	LOC115712602	XM_030640905	flavonoid 3',5'-methyltransferase	protein_coding	8.372048177	1.49E-41	7.36E-39	6.744386867	4.13E-46	1.40E-43
2.0165279140201487e-05-2	NC_044375.1	54831001	54833199	+	55.0277	2198	Intergenic	Intergenic	38641	LOC115718674	LOC115718674	XM_030647495	zinc finger protein WIP5	protein_coding	1.200110357	0.673590619	1	-1.804768571	0.054712051	0.353352412
2.0165279140201487e-05-3	NC_044377.1	13574401	13575999	+	55.0277	1598	Intergenic	Intergenic	-30308	LOC115696126	LOC115696126	XR_004007721	small nucleolar RNA R71	snoRNA	NA	NA	NA	NA	NA	NA
2.0165279140201487e-05-4	NC_044379.1	29227801	29228799	+	55.0277	998	Intergenic	Intergenic	-38464	LOC115701145	LOC115701145	XR_004008516	uncharacterized LOC115701145	lncRNA	NA	NA	NA	NA	NA	NA
2.0165279140201487e-05	NC_044372.1	65139401	65141799	+	55.0277	2398	Intergenic	Intergenic	4209	LOC115710864	LOC115710864	XM_030639219	uncharacterized LOC115710864	protein_coding	NA	NA	NA	NA	NA	NA
4.501707724162576e-10	NC_044374.1	83213401	83217399	+	55.0023	3998	Intergenic	Intergenic	-5736	LOC115716874	LOC115716874	XM_030645785	28 kDa ribonucleoprotein, chloroplastic	protein_coding	-1.196387823	0.333673561	1	0.724908607	1	1
9.725384908373831e-06	NC_044375.1	21189001	21191399	+	54.9822	2398	Intergenic	Intergenic	-4646	LOC115719945	LOC115719945	XM_030649116	uncharacterized LOC115719945	protein_coding	NA	NA	NA	NA	NA	NA
0.0010940775982414385	NW_022060329.1	164401	165199	+	54.9822	798	Intergenic	Intergenic	-19708	LOC115701979	LOC115701979	XR_004008776	#N/A	lncRNA	NA	NA	NA	NA	NA	NA
0.00022208284065000956-2	NC_044370.1	94396801	94397999	+	54.9822	1198	Intergenic	Intergenic	-23704	LOC115698167	LOC115698167	XM_030625350	uncharacterized LOC115698167	protein_coding	1.210979073	0.557849782	1	0.391183308	1	1
4.6119171488320624e-05	NC_044372.1	15363601	15365399	+	54.9822	1798	Intergenic	Intergenic	-44334	LOC115710472	LOC115710472	XM_030638833	uncharacterized LOC115710472	protein_coding	1.167181664	0.936955752	NA	1.107319735	0.957624322	1
4.6119171488320624e-05-2	NC_044375.1	34566201	34568399	+	54.9822	2198	TTS	-TTS (LOC115720041)	1642	LOC115720041	LOC115720041	XM_030649205	uncharacterized LOC115720041	protein_coding	0.410947537	1	NA	0.998328082	1	NA
0.00022208284065000956	NC_044370.1	57184601	57185799	+	54.9822	1198	Intergenic	Intergenic	-38153	LOC115703463	LOC115703463	XR_004009225	small nucleolar RNA R71	snoRNA	NA	NA	NA	NA	NA	NA
4.458234779972229e-07	NC_044379.1	60482601	60485999	+	54.9822	3398	Intergenic	Intergenic	-17832	LOC115701689	LOC115701689	XR_004008678	small nucleolar RNA U54	snoRNA	0	1	NA	-0.925217262	1	NA
4.93569070971709e-10	NW_022060476.1	470601	475199	+	54.9621	4598	Intergenic	Intergenic	-258900	LOC115702188	LOC115702188	XM_030629636	#N/A	protein_coding	NA	NA	NA	NA	NA	NA
4.7107436108898956e-08	NC_044377.1	9519801	9522999	+	54.9558	3198	Intergenic	Intergenic	-42071	LOC115695741	LOC115695741	XM_030622814	transcription factor MYB82,	protein_coding	0.030616292	1	1	-0.913017783	1	1
2.302470672537914e-08	NC_044376.1	41049201	41052999	+	54.9318	3798	Intergenic	Intergenic	7980	LOC115722227	LOC115722227	XM_030651380	uncharacterized LOC115722227,	protein_coding	-1.387810402	0.073284225	0.415265207	0.132302483	1	1
0.00010593240769993297	NC_044377.1	8023401	8024599	+	54.9262	1198	Intergenic	Intergenic	26849	LOC115724840	LOC115724840	XM_030654197	NADP-dependent glyceraldehyde-3-phosphate dehydrogenase	protein_coding	-1.593673033	0.009273117	0.075633707	0.390995959	1	1
0.0005157157395260225-2	NC_044375.1	41616001	41617199	+	54.9101	1198	Intergenic	Intergenic	17682	LOC115719519	LOC115719519	XM_030648596	hydroxymethylglutaryl-CoA lyase, mitochondrial	protein_coding	-0.586667647	1	1	0.67016225	1	1
0.0005157157395260225	NC_044371.1	24255801	24256799	+	54.9101	998	Intergenic	Intergenic	-7340	LOC115703915	LOC115703915	XM_030631150	uncharacterized LOC115703915	protein_coding	NA	NA	NA	NA	NA	NA
5.168586756939549e-08-2	NC_044372.1	5864401	5867199	+	54.9025	2798	Intergenic	Intergenic	2429	LOC115710353	LOC115710353	XM_030638722	uncharacterized LOC115710353	protein_coding	NA	NA	NA	NA	NA	NA
5.168586756939549e-08	NC_044370.1	64426001	64429399	+	54.9025	3398	Intergenic	Intergenic	-5878	LOC115723221	LOC115723221	XM_030652657	uncharacterized LOC115723221	protein_coding	NA	NA	NA	NA	NA	NA
5.168586756939549e-08-3	NC_044379.1	61194801	61197999	+	54.9025	3198	promoter-TSS	-promoter-TSS (LOC115700673)	-1446	LOC115700673	LOC115700673	XM_030628292	probable leucine-rich repeat receptor-like protein kinase At1g35710	protein_coding	1.2634132	0.94803931	NA	1.850786648	0.833284852	NA
1.0688691856772061e-05	NC_044376.1	58115801	58117599	+	54.898	1798	intron	-intron (LOC115723963, intron 2 of 2)	5198	LOC115723963	LOC115723963	XM_030653422	uncharacterized LOC115723963	protein_coding	NA	NA	NA	NA	NA	NA
5.0731568277626344e-05-5	NC_044376.1	33453401	33455399	+	54.881	1998	Intergenic	Intergenic	3358	LOC115724130	LOC115724130	XM_030653598	#N/A	protein_coding	2.608663165	0.154169551	0.740530056	3.265373047	0.046827012	0.312392158
5.0731568277626344e-05-4	NC_044375.1	34896201	34897599	+	54.881	1398	Intergenic	Intergenic	23310	LOC115721529	LOC115721529	XR_004012545	U4 spliceosomal RNA	snRNA	-0.614077994	1	1	0.004713629	1	1
5.0731568277626344e-05	NC_044370.1	89262201	89263799	+	54.881	1598	Intergenic	Intergenic	-33094	LOC115697219	LOC115697219	XM_030624146	phosphatidylinositol 4-phosphate 5-kinase 1	protein_coding	-0.074862468	1	1	1.009149914	0.955815444	1
5.0731568277626344e-05-2	NC_044371.1	16050401	16051799	+	54.881	1398	Intergenic	Intergenic	-11129	LOC115703823	LOC115703823	XM_030631053	uncharacterized LOC115703823	protein_coding	NA	NA	NA	NA	NA	NA
5.0731568277626344e-05-3	NC_044371.1	93302201	93303999	+	54.881	1798	promoter-TSS	-promoter-TSS (LOC115708419)	-1769	LOC115708419	LOC115708419	XR_004009920	small nucleolar RNA R71	snoRNA	NA	NA	NA	NA	NA	NA
1.1053128592000234e-06	NC_044373.1	47949601	47951999	+	54.881	2398	Intergenic	Intergenic	-14066	LOC115713483	LOC115713483	XM_030641966	#N/A	protein_coding	NA	NA	NA	NA	NA	NA
0.002585405942667409	NC_044375.1	54257601	54258399	+	54.881	798	Intergenic	Intergenic	-101462	LOC115720200	LOC115720200	XM_030649356	uncharacterized LOC115720200	protein_coding	NA	NA	NA	NA	NA	NA
2.536892804036859e-18	NC_044377.1	24490801	24498999	+	54.873	8198	Intergenic	Intergenic	374352	LOC115695060	LOC115695060	XM_030622157	uncharacterized LOC115695060	protein_coding	NA	NA	NA	NA	NA	NA
5.1654007120413705e-06-2	NC_044376.1	43732201	43732999	+	54.8653	798	Intergenic	Intergenic	42006	LOC115724377	LOC115724377	XR_004013170	small nucleolar RNA R71	snoRNA	NA	NA	NA	NA	NA	NA
2.913674701210937e-10	NC_044377.1	42917401	42921399	+	54.8653	3998	Intergenic	Intergenic	-30427	LOC115695200	LOC115695200	XM_030622285	uncharacterized LOC115695200	protein_coding	NA	NA	NA	NA	NA	NA
5.1654007120413705e-06	NC_044370.1	60785201	60787199	+	54.8653	1998	Intergenic	Intergenic	-30475	LOC115703460	LOC115703460	XR_004009222	small nucleolar RNA R71	snoRNA	NA	NA	NA	NA	NA	NA
0.00024460108733677675	NC_044370.1	78184601	78185599	+	54.8555	998	Intergenic	Intergenic	-63752	LOC115718249	LOC115718249	XR_004011836	uncharacterized LOC115718249,	lncRNA	2.350391303	0.733811376	NA	1.975991037	0.805851496	NA
0.00024460108733677675-4	NC_044374.1	38037201	38038399	+	54.8555	1198	Intergenic	Intergenic	-17587	LOC115716648	LOC115716648	XM_030645495	poly [ADP-ribose] polymerase tankyrase-1	protein_coding	0.130560217	1	1	0.005177191	1	1
0.00024460108733677675-3	NC_044374.1	11002601	11004199	+	54.8555	1598	Intergenic	Intergenic	-72800	LOC115717559	LOC115717559	XM_030646544	uncharacterized LOC115717559	protein_coding	0.410947537	1	NA	0.998328082	1	NA
0.00024460108733677675-2	NC_044370.1	100553601	100554799	+	54.8555	1198	Intergenic	Intergenic	-54958	LOC115700038	LOC115700038	XM_030627603	uncharacterized LOC115700038,	protein_coding	0.314978689	1	1	0.286100802	1	1
2.437740013113007e-05	NC_044377.1	51986601	51988399	+	54.8438	1798	Intergenic	Intergenic	39214	LOC115695623	LOC115695623	XR_004007510	uncharacterized LOC115695623	lncRNA	NA	NA	NA	NA	NA	NA
3.46258092508165e-11	NC_044375.1	66151001	66154799	+	54.8244	3798	intron	-intron (LOC115720264, intron 1 of 2)	1079	LOC115720264	LOC115720264	XM_030649419	uncharacterized LOC115720264	protein_coding	-0.294601175	1	1	-0.642392371	1	1
6.072973393103414e-17	NC_044378.1	35473801	35480599	+	54.8199	6798	Intergenic	Intergenic	15573	LOC115697469	LOC115697469	XM_030624488	apoptosis inhibitor 5-like protein API5	protein_coding	-0.603251022	1	1	-0.146990579	1	1
0.0012073995355956868-3	NC_044377.1	34870401	34871599	+	54.8126	1198	promoter-TSS	-promoter-TSS (LOC115724812)	-1151	LOC115724812	LOC115724812	XR_004013285	uncharacterized LOC115724812	lncRNA	-0.243040191	1	1	-0.42125986	1	1
0.0012073995355956868-2	NC_044374.1	45859601	45860399	+	54.8126	798	Intergenic	Intergenic	-64374	LOC115717791	LOC115717791	XM_030646765	uncharacterized LOC115717791	protein_coding	NA	NA	NA	NA	NA	NA
[truncated: 11,180 more rows]

## Sheet: Trichome_annotate_H3K27me3
p-value	Chr	Start	End	Strand	Peak Score	Focus Ratio/Region Size	Annotation	Detailed Annotation	Distance to TSS	Nearest PromoterID	Entrez ID	Nearest Unigene	Nearest Gene Description	Gene Type	trichome/leaf_DESeq2_log2FoldChange	trichome/leaf_DESeq2_pvalue	trichome_leaf_DESeq2_padj	trichome/stem_DESeq2_log2FoldChange	trichome/stem_DESeq2_pvalue	trichome/stem_DESeq2_padj
[truncated: 10,284 more rows]

[truncated: 4 more sheets: Trichome_annotate_H3K56ac, Trichome_annotate_H3K4me3, Cs10_genes, Boxplot]
