# Supplementary material for: Characterization of the Cannabis sativa glandular trichome epigenome
Source: bioRxiv preprint, doi:10.1101/2024.07.04.602151, version 1 (2024-07-08)
Supplement: Additional File 3 [file 602151_file04.xlsx]

## Sheet: Read_Me
This document contains the annotated chromatin peaks for H3K4me3, H3K56ac, H3K27me3, and H2A.Z for leaf tissue. These histone modification ChIP-seq peaks were annotated using HOMER annotatePeaks.pl script and provide structural genomic context to the peaks used in this study.

## Sheet: Leaf_annotate_H2AZ
p-value	Chr	Start	End	Strand	Peak Score	Focus Ratio/Region Size	Annotation	Detailed Annotation	Distance to TSS	Nearest PromoterID	Entrez ID	Nearest Unigene	Nearest Gene Description	Gene Type	Leaf vs. Stem log2FC	Leaf vs. Stem p-value	Leaf vs. Stem p-adj(FDR)	Leaf vs. Trichome log2FC	Leaf vs. Trichome p-value	Leaf vs. Trichome p-adj(FDR)
3.868086823484083e-40	NC_044377.1	42065201	42066599	+	188.14	1398	Intergenic	Intergenic	-69459	LOC115695196	LOC115695196	XM_030622282	uncharacterized LOC115695196	protein_coding	NA	NA	NA	NA	NA	NA
3.6709102090162466e-10	NC_044376.1	29834801	29836199	+	101.589	1398	Intergenic	Intergenic	-12157	LOC115723748	LOC115723748	XM_030653225	uncharacterized LOC115723748	protein_coding	NA	NA	NA	NA	NA	NA
3.577784940991332e-07	NC_044371.1	14166401	14168199	+	73.9544	1798	exon	-exon (LOC115705025, exon 2 of 2)	1026	LOC115705025	LOC115705025	XM_030632259	UDP-glycosyltransferase 76F1	protein_coding	-1.387995583	0.839197345	1	-6.141377577	0.001881026	0.019867558
9.955737916997226e-07	NC_044375.1	84369001	84370999	+	70.2923	1998	Intergenic	Intergenic	-6875	LOC115719446	LOC115719446	XM_030648498	50S ribosomal protein L4, chloroplastic,	protein_coding	2.177416714	1.30977E-09	2.87088E-08	1.166802508	0.388575447	1
3.1769324583800506e-07	NC_044372.1	65515601	65517399	+	70.2373	1798	Intergenic	Intergenic	-34250	LOC115711721	LOC115711721	XR_004010601	small nucleolar RNA R71	snoRNA	NA	NA	NA	NA	NA	NA
5.5303916299185586e-06	NC_044377.1	8684601	8685799	+	70.2211	1198	TTS	-TTS (LOC115694945)	-3478	LOC115696063	LOC115696063	XR_004007661	small nucleolar RNA R71	snoRNA	NA	NA	NA	NA	NA	NA
9.777209030152115e-06	NW_022060382.1	22801	24399	+	70.0664	1598	NA	NA	NA	NA			#N/A		NA	NA	NA	NA	NA	NA
3.0919089166539714e-06	NC_044379.1	15072601	15073799	+	70.0249	1198	Intergenic	Intergenic	-7564	LOC115699877	LOC115699877	XM_030627419	uncharacterized LOC115699877	protein_coding	NA	NA	NA	NA	NA	NA
1.6343832888883046e-07	NC_044374.1	65941201	65943199	+	68.6003	1998	Intergenic	Intergenic	-9934	LOC115718305	LOC115718305	XR_004011885	small nucleolar RNA R71	snoRNA	NA	NA	NA	NA	NA	NA
4.729302904469889e-06	NC_044379.1	16925201	16926799	+	67.0502	1598	Intergenic	Intergenic	-8696	LOC115698492	LOC115698492	XM_030625564	putative disease resistance protein RGA1	protein_coding	-1.80927644	0.004162155	0.028957331	-0.926128293	1	1
1.4982227763383923e-05	NC_044373.1	36493801	36494599	+	66.7335	798	Intergenic	Intergenic	-2685	LOC115713369	LOC115713369	XM_030641850	uncharacterized LOC115713369	protein_coding	NA	NA	NA	NA	NA	NA
1.3126171666517052e-06	NC_044379.1	22967801	22969199	+	65.6147	1398	Intergenic	Intergenic	-3928	LOC115699939	LOC115699939	XM_030627486	uncharacterized LOC115699939	protein_coding	NA	NA	NA	NA	NA	NA
4.124183962377102e-06	NC_044377.1	6399401	6400999	+	65.209	1598	intron	-intron (LOC115724903, intron 2 of 4)	4195	LOC115724903	LOC115724903	XM_030654274	autophagy-related protein 11	protein_coding	-0.022044736	1	1	-0.820047023	1	1
1.259461701196983e-06	NC_044374.1	70749601	70751599	+	65.1704	1998	exon	-exon (LOC115717951, exon 1 of 1)	560	LOC115717951	LOC115717951	XM_030646919	subtilisin-like protease SBT1.2	protein_coding	-0.374376113	1	NA	0	1	NA
1.9872317247380433e-07	NW_022060417.1	1915401	1917399	+	64.4862	1998	Intergenic	Intergenic	-8725	LOC115702061	LOC115702061	XR_004008790	#N/A	lncRNA	-0.374376113	1	NA	0	1	NA
1.733518263884719e-08	NC_044377.1	54256401	54259799	+	63.951	3398	Intergenic	Intergenic	-10620	LOC115695274	LOC115695274	XM_030622351	uncharacterized LOC115695274	protein_coding	NA	NA	NA	NA	NA	NA
3.6168815714408627e-06	NC_044376.1	15238601	15240399	+	63.8248	1798	Intergenic	Intergenic	9070	LOC115722641	LOC115722641	XM_030651901	probable aldo-keto reductase 2	protein_coding	-1.413670328	0.043033474	0.217922148	-0.384761275	1	1
3.947133366869302e-05	NC_044370.1	86835201	86836399	+	63.5274	1198	Intergenic	Intergenic	-33323	LOC115695432	LOC115695432	XM_030622504	uncharacterized LOC115695432,	protein_coding	-1.093493292	0.776493556	1	-1.933384451	0.004505105	0.041595401
0.00013199779156548923	NC_044378.1	27484601	27485599	+	63.3027	998	Intergenic	Intergenic	56785	LOC115697257	LOC115697257	XR_004007924	uncharacterized LOC115697257	lncRNA	NA	NA	NA	NA	NA	NA
1.7556611830491606e-06	NC_044376.1	23217001	23218199	+	62.7968	1198	Intergenic	Intergenic	-5918	LOC115722866	LOC115722866	XM_030652205	triacylglycerol lipase 2,	protein_coding	-0.113139866	1	1	0.173528839	1	1
6.793640793188424e-05	NC_044371.1	66904801	66905799	+	62.7034	998	Intergenic	Intergenic	-16044	LOC115706225	LOC115706225	XM_030633803	cytochrome P450 78A3	protein_coding	2.49916388	9.95841E-05	0.001005412	-2.02355266	0.007678875	0.064826973
5.756755891920504e-06	NC_044372.1	16718001	16719599	+	62.5648	1598	Intergenic	Intergenic	-87629	LOC115711200	LOC115711200	XR_004010429	uncharacterized LOC115711200	lncRNA	NA	NA	NA	NA	NA	NA
5.3435109108381956e-06	NC_044372.1	17288401	17290799	+	61.9621	2398	Intergenic	Intergenic	76162	LOC115710486	LOC115710486	XM_030638848	uncharacterized LOC115710486	protein_coding	NA	NA	NA	NA	NA	NA
8.48226737643963e-07	NC_044374.1	5027001	5028399	+	61.9518	1398	exon	-exon (LOC115715631, exon 3 of 4)	-3116	LOC115715632	LOC115715632	XR_004011404	uncharacterized LOC115715632	lncRNA	NA	NA	NA	NA	NA	NA
1.8056568772731646e-05	NC_044370.1	13495001	13496399	+	61.8235	1398	Intergenic	Intergenic	3967	LOC115703416	LOC115703416	XR_004009182	U7 small nuclear RNA	snRNA	NA	NA	NA	NA	NA	NA
1.3263820732731122e-07	NC_044377.1	44932201	44933799	+	61.8035	1598	Intergenic	Intergenic	21732	LOC115696013	LOC115696013	XR_004007615	small nucleolar RNA R71	snoRNA	NA	NA	NA	NA	NA	NA
0.00011683153184774277	NC_044370.1	21082401	21083399	+	61.8035	998	Intergenic	Intergenic	7391	LOC115706035	LOC115706035	XM_030633539	serine/threonine-protein kinase RIPK	protein_coding	-0.988523615	1	1	-1.907984734	0.542607994	1
6.149026813932157e-05	NC_044374.1	69044801	69045999	+	61.6415	1198	Intergenic	Intergenic	8283	LOC115716406	LOC115716406	XM_030645192	AT-hook motif nuclear-localized protein 5	protein_coding	-0.398340259	1	1	0.461925214	1	1
9.087336932859056e-06	NC_044370.1	32551601	32552399	+	61.2937	798	Intergenic	Intergenic	38102	LOC115719828	LOC115719828	XM_030649016	ankyrin repeat-containing protein BDA1-like	protein_coding	NA	NA	NA	NA	NA	NA
3.161323962239339e-05	NC_044375.1	55867801	55868599	+	61.2787	798	Intergenic	Intergenic	28150	LOC115719187	LOC115719187	XM_030648132	non-specific phospholipase C2	protein_coding	-5.064932992	2.78167E-37	5.74969E-35	-2.391794588	1.38068E-05	0.000266206
3.8762192636264553e-07	NC_044372.1	36166401	36168799	+	60.9573	2398	Intergenic	Intergenic	-23102	LOC115709904	LOC115709904	XM_030638158	phosphatidylinositol 4-phosphate 5-kinase 9,	protein_coding	0.370679718	1	1	-0.246208837	1	1
1.5853786275424027e-05	NC_044376.1	54828601	54830199	+	60.7766	1598	Intergenic	Intergenic	-10111	LOC115723922	LOC115723922	XM_030653383	TPR and ankyrin repeat-containing protein 1-like	protein_coding	NA	NA	NA	NA	NA	NA
8.39648572020977e-06	NC_044374.1	60573201	60574799	+	60.7237	1598	Intergenic	Intergenic	117845	LOC115717877	LOC115717877	XM_030646848	uncharacterized LOC115717877	protein_coding	NA	NA	NA	NA	NA	NA
4.2211228699673e-06	NC_044373.1	68128401	68129999	+	60.3388	1598	Intergenic	Intergenic	6861	LOC115712536	LOC115712536	XR_004010885	uncharacterized LOC115712536	lncRNA	NA	NA	NA	NA	NA	NA
2.123669093267237e-06	NC_044372.1	32937601	32939599	+	60.0113	1998	Intergenic	Intergenic	-9310	LOC115709108	LOC115709108	XM_030637141	uncharacterized LOC115709108	protein_coding	0.05199271	1	1	-0.103048517	1	1
5.103965641965368e-05	NC_044376.1	22804001	22804999	+	60.0113	998	Intergenic	Intergenic	-3502	LOC115723181	LOC115723181	XM_030652614	NAC domain-containing protein 101-like	protein_coding	NA	NA	NA	NA	NA	NA
1.3459029331959588e-05	NC_044375.1	35979801	35981199	+	59.6501	1398	Intergenic	Intergenic	-12927	LOC115720054	LOC115720054	XM_030649217	probable serine/threonine-protein kinase PBL25	protein_coding	1.035383325	0.974554765	1	-2.272166155	0.181900078	0.837725249
4.828060801190003e-05	NC_044370.1	14930201	14931399	+	59.5913	1198	Intergenic	Intergenic	-2740	LOC115703330	LOC115703330	XR_004009104	small nucleolar RNA R71	snoRNA	NA	NA	NA	NA	NA	NA
1.0112338460813521e-06	NC_044370.1	101594001	101594999	+	59.4553	998	TTS	-TTS (LOC115703403)	664	LOC115703403	LOC115703403	XR_004009169	small nucleolar RNA R71	snoRNA	NA	NA	NA	NA	NA	NA
2.4758020763378768e-05	NC_044376.1	51173801	51175199	+	59.4346	1398	Intergenic	Intergenic	77004	LOC115724075	LOC115724075	XM_030653532	uncharacterized LOC115724075	protein_coding	-0.057460672	1	1	-2.232191843	0.073743832	0.417275033
6.551297432193897e-06	NC_044373.1	49035401	49037599	+	59.1892	2198	Intergenic	Intergenic	-62696	LOC115713488	LOC115713488	XM_030641971	uncharacterized LOC115713488	protein_coding	NA	NA	NA	NA	NA	NA
0.00032551695920835535	NC_044372.1	93285001	93285799	+	59.1892	798	Intergenic	Intergenic	-6006	LOC115710812	LOC115710812	XM_030639163	U-box domain-containing protein 21	protein_coding	5.162800363	0.141073198	0.584828569	1.403915809	0.877780334	1
6.551297432193897e-06-2	NC_044374.1	8107601	8109599	+	59.1892	1998	Intergenic	Intergenic	-3894	LOC115716864	LOC115716864	XM_030645768	protein REVEILLE 6	protein_coding	-0.216874297	1	1	0.255239422	1	1
2.3392384808843247e-05	NC_044372.1	35264201	35264999	+	59.0689	798	Intergenic	Intergenic	21548	LOC115711695	LOC115711695	XM_030640076	UDP-glycosyltransferase 73C3	protein_coding	1.571385161	0.664992835	1	-5.387787295	2.69524E-07	7.24623E-06
0.00016533652645747048	NC_044377.1	22809401	22810799	+	59.0332	1398	Intergenic	Intergenic	-80140	LOC115725021	LOC115725021	XM_030654421	protein translation factor SUI1 homolog	protein_coding	-0.414930031	1	1	0.760235712	1	1
0.0003163083644908115	NC_044377.1	28830001	28830999	+	58.9306	998	Intergenic	Intergenic	59200	LOC115695078	LOC115695078	XM_030622172	uncharacterized LOC115695078	protein_coding	NA	NA	NA	NA	NA	NA
1.5082635039083965e-09	NC_044377.1	49878201	49881399	+	58.8852	3198	Intergenic	Intergenic	6510	LOC115725759	LOC115725759	XM_030655367	probable inactive purple acid phosphatase 28,	protein_coding	-0.263453963	1	1	0.075978409	1	1
3.1910787601164347e-06	NC_044374.1	79460801	79462999	+	58.804	2198	Intergenic	Intergenic	-3237	TRNAM-CAU_9	TRNAM-CAU_9	TRNAM-CAU_9	#N/A	tRNA	NA	NA	NA	NA	NA	NA
4.185541774221778e-05	NC_044374.1	34679801	34681199	+	58.6174	1398	Intergenic	Intergenic	14577	LOC115717712	LOC115717712	XM_030646692	uncharacterized LOC115717712	protein_coding	NA	NA	NA	NA	NA	NA
5.840598331652436e-06	NC_044379.1	7801601	7803799	+	58.5805	2198	Intergenic	Intergenic	61370	LOC115699001	LOC115699001	XR_004008276	uncharacterized LOC115699001,	lncRNA	0	1	NA	-1.916017691	0.81856913	NA
2.145337011544222e-05	NC_044374.1	64923201	64924599	+	58.5466	1398	intron	-intron (LOC115717909, intron 2 of 2)	549	LOC115717909	LOC115717909	XM_030646876	uncharacterized LOC115717909	protein_coding	-0.374376113	1	NA	0	1	NA
4.0652175568467496e-05	NC_044377.1	35304801	35306199	+	58.4345	1398	Intergenic	Intergenic	18073	LOC115695123	LOC115695123	XM_030622214	protein FAR1-RELATED SEQUENCE 5-like	protein_coding	NA	NA	NA	NA	NA	NA
2.3634950192743596e-09	NC_044375.1	8013001	8016599	+	58.3545	3598	TTS	-TTS (LOC115719834)	3431	LOC115719834	LOC115719834	XM_030649022	uncharacterized LOC115719834	protein_coding	-0.374389475	1	NA	-1.894529746	0.779989022	NA
7.722402735628133e-05	NW_022060348.1	319201	320999	+	58.3039	1798	Intergenic	Intergenic	3228	LOC115702009	LOC115702009	XM_030629472	#N/A	protein_coding	NA	NA	NA	NA	NA	NA
3.832716516174932e-05	NC_044370.1	65608601	65610399	+	58.0799	1798	Intergenic	Intergenic	-8247	LOC115713359	LOC115713359	XM_030641842	replication factor C subunit 3-like	protein_coding	-0.989735776	1	1	-1.699501723	0.515589473	1
7.369180970570736e-07	NW_022060469.1	43401	45199	+	58.0799	1798	NA	NA	NA	NA			#N/A		NA	NA	NA	NA	NA	NA
9.470103702583943e-10	NC_044371.1	99151001	99153799	+	57.668	2798	intron	-intron (LOC115705242, intron 6 of 22)	6603	LOC115705242	LOC115705242	XM_030632522	pleiotropic drug resistance protein 1	protein_coding	-0.287074282	1	1	-3.120570756	4.97633E-17	4.66634E-15
4.750536072023007e-06	NC_044378.1	49197201	49199399	+	57.6067	2198	Intergenic	Intergenic	8769	LOC115697700	LOC115697700	XM_030624795	berberine bridge enzyme-like 15	protein_coding	-1.16257115	0.61937252	1	-0.752704021	1	1
9.22809133346106e-06	NC_044372.1	56425801	56426999	+	57.5973	1198	Intergenic	Intergenic	-5753	LOC115710793	LOC115710793	XM_030639140	uncharacterized LOC115710793	protein_coding	NA	NA	NA	NA	NA	NA
1.7961741152842003e-05	NC_044375.1	78745401	78746199	+	57.5865	798	Intergenic	Intergenic	-5811	LOC115719565	LOC115719565	XM_030648661	protein UPSTREAM OF FLC,	protein_coding	2.123806716	4.26832E-05	0.000464345	-0.430810147	1	1
3.399822226364965e-05	NC_044377.1	37648001	37649399	+	57.4117	1398	Intergenic	Intergenic	-7766	LOC115725431	LOC115725431	XM_030654943	peptidyl-prolyl cis-trans isomerase CYP37, chloroplastic,	protein_coding	1.487647908	0.003115839	0.022315861	1.270006784	0.101203695	0.53446116
4.473000676452853e-06	NC_044375.1	57844401	57845999	+	57.3478	1598	Intergenic	Intergenic	21827	LOC115720218	LOC115720218	XM_030649375	uncharacterized mitochondrial protein AtMg00240-like	protein_coding	0	1	NA	-0.410947537	1	NA
1.6908452652676583e-05	NC_044373.1	19930001	19931799	+	57.2891	1798	Intergenic	Intergenic	-19597	LOC115714958	LOC115714958	XM_030643723	uncharacterized LOC115714958,	protein_coding	-0.674427943	1	1	0.291851268	1	1
4.0796954832953886e-08	NC_044378.1	18943601	18945399	+	57.2098	1798	intron	-intron (LOC115697798, intron 2 of 4)	9128	LOC115697800	LOC115697800	XM_030624932	tropinone reductase	protein_coding	-0.012273473	1	1	-2.1717281	0.245734011	1
3.0083492574869785e-05	NC_044378.1	42885401	42886999	+	56.7932	1598	Intergenic	Intergenic	35508	LOC115698406	LOC115698406	XR_004008154	small nucleolar RNA R71	snoRNA	NA	NA	NA	NA	NA	NA
0.00047745370313691807	NW_022060417.1	1489401	1490399	+	56.7932	998	Intergenic	Intergenic	8698	LOC115702068	LOC115702068	XM_030629516	#N/A	protein_coding	NA	NA	NA	NA	NA	NA
6.541147604236238e-08	NC_044378.1	22369201	22371199	+	56.6666	1998	Intergenic	Intergenic	-41422	LOC115697429	LOC115697429	XM_030624428	zinc finger protein CONSTANS-LIKE 14,	protein_coding	-0.005061845	1	1	0.034408576	1	1
5.701414984412208e-05	NW_022060498.1	59401	61199	+	56.5532	1798	Intergenic	Intergenic	37932	LOC115702219	LOC115702219	XR_004008821	#N/A	lncRNA	NA	NA	NA	NA	NA	NA
3.6101732549406067e-06	NC_044377.1	67228801	67230799	+	56.5009	1998	Intergenic	Intergenic	24386	LOC115725014	LOC115725014	XR_004013328	uncharacterized LOC115725014	lncRNA	NA	NA	NA	NA	NA	NA
1.4059852723801023e-05	NC_044379.1	23952201	23953799	+	56.4569	1598	Intergenic	Intergenic	32206	LOC115700872	LOC115700872	XM_030628535	phosphate transporter PHO1 homolog 3	protein_coding	-1.35818212	0.77712894	1	-1.464537804	0.713527754	1
5.526169742465485e-05	NC_044373.1	14841401	14842999	+	56.3972	1598	Intergenic	Intergenic	18276	LOC115715225	LOC115715225	XR_004011193	uncharacterized LOC115715225	lncRNA	-0.63503533	1	1	-0.156705064	1	1
2.740626563759113e-05	NC_044379.1	25385801	25387199	+	56.3587	1398	Intergenic	Intergenic	105892	LOC115699951	LOC115699951	XM_030627497	uncharacterized LOC115699951	protein_coding	NA	NA	NA	NA	NA	NA
0.0004208285822667134	NC_044372.1	75984201	75984999	+	55.9471	798	Intergenic	Intergenic	3717	LOC115710945	LOC115710945	XM_030639293	uncharacterized LOC115710945	protein_coding	0	1	NA	-0.410947537	1	NA
0.00010168507871211536	NC_044373.1	21433401	21434799	+	55.9471	1398	Intergenic	Intergenic	21303	LOC115713235	LOC115713235	XM_030641719	uncharacterized LOC115713235	protein_coding	NA	NA	NA	NA	NA	NA
5.9906369334506435e-06	NC_044370.1	36831201	36833399	+	55.8334	2198	Intergenic	Intergenic	46838	LOC115711223	LOC115711223	XR_004010437	uncharacterized LOC115711223	lncRNA	NA	NA	NA	NA	NA	NA
9.849887643386155e-05	NC_044374.1	52230801	52231999	+	55.7884	1198	Intergenic	Intergenic	-30892	LOC115716702	LOC115716702	XM_030645567	probable DEAD-box ATP-dependent RNA helicase 48	protein_coding	-0.006900938	1	1	0.632022657	1	1
5.803975100692842e-06	NC_044374.1	31366601	31368599	+	55.7215	1998	Intergenic	Intergenic	199145	LOC115718148	LOC115718148	XR_004011767	uncharacterized LOC115718148	lncRNA	NA	NA	NA	NA	NA	NA
1.1277218074598783e-05	NC_044379.1	23724801	23726199	+	55.5859	1398	Intergenic	Intergenic	-63212	LOC115698895	LOC115698895	XM_030626097	protein FAR1-RELATED SEQUENCE 5-like	protein_coding	0	1	1	-5.34767208	0.050019573	0.305537418
6.827033585797001e-07	NC_044377.1	21750001	21753199	+	55.579	3198	Intergenic	Intergenic	-26367	LOC115695045	LOC115695045	XM_030622142	uncharacterized LOC115695045	protein_coding	NA	NA	NA	NA	NA	NA
5.446418274920755e-06	NC_044378.1	49952201	49954599	+	55.5025	2398	Intergenic	Intergenic	41949	LOC115697922	LOC115697922	XM_030625095	wall-associated receptor kinase-like 1	protein_coding	NA	NA	NA	NA	NA	NA
3.2165416574963956e-07	NC_044370.1	7173801	7176399	+	55.4309	2598	Intergenic	Intergenic	-9909	LOC115703224	LOC115703224	XR_004009029	uncharacterized LOC115703224,	lncRNA	-0.088039551	1	1	-0.049029605	1	1
4.4250431434376084e-05	NC_044373.1	72774801	72775999	+	55.3857	1198	Intergenic	Intergenic	6798	LOC115713655	LOC115713655	XM_030642142	uncharacterized mitochondrial protein AtMg00820-like	protein_coding	NA	NA	NA	NA	NA	NA
0.0007575943911760214	NC_044374.1	74138001	74138999	+	55.0832	998	exon	-exon (LOC115717989, exon 1 of 1)	207	LOC115717989	LOC115717989	XM_030646959	uncharacterized mitochondrial protein AtMg00860-like	protein_coding	NA	NA	NA	NA	NA	NA
5.637920610738777e-07	NC_044373.1	55372401	55375199	+	55.0593	2798	Intergenic	Intergenic	9954	LOC115715047	LOC115715047	XR_004011163	uncharacterized LOC115715047	lncRNA	NA	NA	NA	NA	NA	NA
4.015988128557541e-05	NC_044375.1	30161001	30161999	+	54.9912	998	Intergenic	Intergenic	5215	LOC115720013	LOC115720013	XM_030649181	F-box/LRR-repeat protein At3g26922-like	protein_coding	NA	NA	NA	NA	NA	NA
2.655272383908254e-07	NC_044370.1	61917401	61920599	+	54.9487	3198	Intergenic	Intergenic	8102	LOC115722929	LOC115722929	XM_030652314	uncharacterized LOC115722929	protein_coding	NA	NA	NA	NA	NA	NA
9.298966896098078e-06	NC_044378.1	68162801	68165399	+	54.9129	2598	exon	-exon (LOC115696783, exon 1 of 2)	435	LOC115696783	LOC115696783	XM_030623666	36.4 kDa proline-rich protein-like	protein_coding	NA	NA	NA	NA	NA	NA
4.4913277651739995e-06-2	NC_044377.1	42348201	42350599	+	54.8823	2398	Intergenic	Intergenic	8901	LOC115695198	LOC115695198	XM_030622283	uncharacterized LOC115695198	protein_coding	NA	NA	NA	NA	NA	NA
0.0007330491584368225	NC_044371.1	24303201	24303999	+	54.8823	798	Intergenic	Intergenic	-22633	LOC115703916	LOC115703916	XM_030631151	uncharacterized LOC115703916	protein_coding	NA	NA	NA	NA	NA	NA
4.4913277651739995e-06	NC_044375.1	41616001	41617199	+	54.8823	1198	Intergenic	Intergenic	17682	LOC115719519	LOC115719519	XM_030648596	hydroxymethylglutaryl-CoA lyase, mitochondrial	protein_coding	1.256829897	0.08928034	0.402399994	0.586667647	1	1
9.002028627789663e-06	NC_044378.1	68437801	68439799	+	54.8066	1998	Intergenic	Intergenic	4199	LOC115696792	LOC115696792	XM_030623675	NAC domain-containing protein 41-like	protein_coding	NA	NA	NA	NA	NA	NA
0.0001645609845894481	NC_044377.1	2493401	2494199	+	54.7949	798	promoter-TSS	-promoter-TSS (LOC115695994)	89	LOC115695994	LOC115695994	XR_004007598	small nucleolar RNA R71	snoRNA	NA	NA	NA	NA	NA	NA
0.0007091787568998888	NC_044374.1	34929801	34930799	+	54.6871	998	Intergenic	Intergenic	-219764	LOC115717435	LOC115717435	XM_030646422	uncharacterized LOC115717435	protein_coding	0.162737964	1	1	0.183229092	1	1
9.879108614252148e-07	NC_044375.1	70048801	70051599	+	54.663	2798	Intergenic	Intergenic	-46151	LOC115720599	LOC115720599	XM_030649747	protein DJ-1 homolog D	protein_coding	0.420777714	1	1	0.609806618	1	1
0.00033511791048554515	NC_044370.1	59765001	59765999	+	54.663	998	Intergenic	Intergenic	45663	LOC115722709	LOC115722709	XM_030651988	uncharacterized LOC115722709	protein_coding	NA	NA	NA	NA	NA	NA
0.0001592352109930011	NC_044372.1	27111801	27112999	+	54.6444	1198	Intergenic	Intergenic	82151	LOC115711472	LOC115711472	XM_030639813	transcription factor PIF7,	protein_coding	-0.176169755	1	1	2.886295042	9.40015E-05	0.001470293
7.600426710592051e-05	NC_044370.1	91259001	91260599	+	54.6295	1598	TTS	-TTS (LOC115703296)	827	LOC115703296	LOC115703296	XR_004009072	small nucleolar RNA R71	snoRNA	NA	NA	NA	NA	NA	NA
0.0003241963908349328	NC_044372.1	90027201	90028199	+	54.4971	998	intron	-intron (LOC115711113, intron 11 of 12)	6375	LOC115711113	LOC115711113	XM_030639450	uncharacterized LOC115711113	protein_coding	0.088315742	1	1	0.553961698	1	1
1.6937110305331987e-05-2	NW_022060485.1	75801	77199	+	54.4971	1398	promoter-TSS	-promoter-TSS (LOC115702201)	17	LOC115702201	LOC115702201	XM_030629650	#N/A	protein_coding	NA	NA	NA	NA	NA	NA
3.5237493385930854e-05	NC_044374.1	19852401	19853599	+	54.4971	1198	promoter-TSS	-promoter-TSS (LOC115715846)	-751	LOC115715846	LOC115715846	XR_004011463	uncharacterized LOC115715846	lncRNA	NA	NA	NA	NA	NA	NA
1.6937110305331987e-05	NC_044376.1	7787401	7789199	+	54.4971	1798	promoter-TSS	-promoter-TSS (LOC115723521)	-1245	LOC115723521	LOC115723521	XM_030653015	uncharacterized LOC115723521	protein_coding	-0.374390846	1	NA	-2.905182161	0.486747911	NA
8.672494991454804e-07	NC_044378.1	12166601	12168799	+	54.3351	2198	Intergenic	Intergenic	-40447	LOC115696351	LOC115696351	XM_030623255	uncharacterized LOC115696351	protein_coding	NA	NA	NA	NA	NA	NA
7.6445447706276e-06	NC_044372.1	83650601	83652399	+	54.2983	1798	promoter-TSS	-promoter-TSS (LOC115708692)	-1251	LOC115708692	LOC115708692	XM_030636676	uncharacterized LOC115708692	protein_coding	-0.209057741	1	1	0.620902249	1	1
0.0001441689916754339	NC_044371.1	25325801	25327399	+	54.2117	1598	Intergenic	Intergenic	90572	LOC115705830	LOC115705830	XM_030633276	WD-40 repeat-containing protein MSI4	protein_coding	-0.145374622	1	1	0.109544482	1	1
0.0006415250966891387	NC_044376.1	26805201	26806199	+	54.1323	998	Intergenic	Intergenic	-9568	LOC115723257	LOC115723257	XR_004012932	uncharacterized LOC115723257	lncRNA	NA	NA	NA	NA	NA	NA
6.9242548891571205e-06	NC_044376.1	18059601	18061399	+	54.0105	1798	Intergenic	Intergenic	-61087	LOC115723630	LOC115723630	XM_030653115	uncharacterized LOC115723630	protein_coding	0	1	NA	-0.410947537	1	NA
6.440565871439995e-05	NC_044379.1	9398401	9399999	+	53.9918	1598	Intergenic	Intergenic	-111182	LOC115699810	LOC115699810	XM_030627353	uncharacterized LOC115699810	protein_coding	NA	NA	NA	NA	NA	NA
2.9862836435719538e-05	NC_044374.1	17258001	17260399	+	53.9257	2398	Intergenic	Intergenic	-54321	LOC115718314	LOC115718314	XR_004011893	small nucleolar RNA R71	snoRNA	NA	NA	NA	NA	NA	NA
3.1321322149027273e-06	NC_044375.1	45639601	45642399	+	53.8712	2798	Intergenic	Intergenic	23701	LOC115719648	LOC115719648	XM_030648766	NAD(H) kinase 1	protein_coding	1.35239665	0.042011503	0.213421546	0.005353646	1	1
2.888339814243907e-05	NC_044375.1	67445001	67447399	+	53.8171	2398	Intergenic	Intergenic	15591	LOC115720792	LOC115720792	XM_030649970	phospholipase A(1) LCAT3,	protein_coding	-0.58497621	1	1	-1.951638466	0.007651413	0.064693677
0.0005996162825420393	NC_044375.1	15104201	15105399	+	53.7864	1198	Intergenic	Intergenic	-6172	LOC115721444	LOC115721444	XR_004012467	small nucleolar RNA R71	snoRNA	NA	NA	NA	NA	NA	NA
0.0012763657890201157	NC_044372.1	72456401	72457199	+	53.6751	798	Intergenic	Intergenic	41589	LOC115710026	LOC115710026	XM_030638327	trihelix transcription factor PTL	protein_coding	-3.631165055	3.32147E-14	1.2255E-12	-2.273273178	0.000308275	0.004232842
5.8249826989401605e-05	NC_044375.1	14463201	14464399	+	53.6365	1198	promoter-TSS	-promoter-TSS (LOC115721519)	19	LOC115721519	LOC115721519	XR_004012535	small nucleolar RNA R71	snoRNA	NA	NA	NA	NA	NA	NA
0.0005795856847802941	NW_022060417.1	1127201	1128399	+	53.6201	1198	Intergenic	Intergenic	240518	LOC115702074	LOC115702074	XR_004008792	#N/A	lncRNA	NA	NA	NA	NA	NA	NA
0.00026505762299827007	NC_044376.1	15365201	15365999	+	53.5792	798	promoter-TSS	-promoter-TSS (LOC115723605)	-1961	LOC115723605	LOC115723605	XM_030653089	uncharacterized LOC115723605	protein_coding	NA	NA	NA	NA	NA	NA
5.632203847386599e-05	NC_044373.1	65456001	65457599	+	53.5223	1598	Intergenic	Intergenic	-14077	LOC115713578	LOC115713578	XM_030642066	uncharacterized LOC115713578	protein_coding	NA	NA	NA	NA	NA	NA
0.0005601547386699842	NC_044379.1	49574601	49575399	+	53.458	798	Intergenic	Intergenic	-6322	LOC115700210	LOC115700210	XM_030627774	uncharacterized LOC115700210	protein_coding	NA	NA	NA	NA	NA	NA
0.0002562077085458008	NC_044373.1	47435401	47436599	+	53.438	1198	Intergenic	Intergenic	22029	LOC115715432	LOC115715432	XR_004011303	small nucleolar RNA R71	snoRNA	NA	NA	NA	NA	NA	NA
6.226055197269888e-09	NC_044375.1	84533001	84534999	+	53.3497	1998	Intergenic	Intergenic	-2522	LOC115720430	LOC115720430	XM_030649580	uncharacterized LOC115720430	protein_coding	NA	NA	NA	NA	NA	NA
0.00024762825478666676	NC_044375.1	74770801	74771999	+	53.2998	1198	Intergenic	Intergenic	-45592	LOC115720350	LOC115720350	XM_030649503	uncharacterized LOC115720350	protein_coding	NA	NA	NA	NA	NA	NA
0.00011391533458729523	NC_044370.1	88858401	88859799	+	53.2998	1398	Intergenic	Intergenic	-2337	LOC115703329	LOC115703329	XR_004009103	small nucleolar RNA R71	snoRNA	NA	NA	NA	NA	NA	NA
5.2643217106950043e-05	NC_044373.1	49093401	49094999	+	53.2998	1598	Intergenic	Intergenic	-4996	LOC115713488	LOC115713488	XM_030641971	uncharacterized LOC115713488	protein_coding	NA	NA	NA	NA	NA	NA
1.1364140334118881e-05	NC_044374.1	12653001	12653999	+	53.2998	998	Intergenic	Intergenic	-25025	LOC115717085	LOC115717085	XM_030646023	DNA-directed RNA polymerase III subunit RPC3-like,	protein_coding	0.528326336	1	1	0.52485856	1	1
2.4420014222022092e-05	NC_044376.1	16569401	16571199	+	53.2998	1798	Intergenic	Intergenic	-24909	LOC115723613	LOC115723613	XM_030653098	F-box protein At3g62230-like	protein_coding	0	1	NA	-2.293765801	0.744733572	NA
0.00011010606004710666	NC_044372.1	2512801	2513999	+	53.1796	1198	Intergenic	Intergenic	9375	LOC115708788	LOC115708788	XM_030636797	auxin-responsive protein SAUR71	protein_coding	-2.7849318	1.78656E-11	4.87135E-10	-1.130406797	0.629192555	1
0.0002393127866857057	NC_044372.1	57654401	57655599	+	53.1647	1198	Intergenic	Intergenic	3639	LOC115710800	LOC115710800	XM_030639149	uncharacterized LOC115710800	protein_coding	NA	NA	NA	NA	NA	NA
2.2822992292040995e-05	NC_044379.1	4415601	4417399	+	53.1042	1798	Intergenic	Intergenic	4746	LOC115699025	LOC115699025	XM_030626235	zinc finger CCCH domain-containing protein 48	protein_coding	-0.719978525	1	1	-0.608519568	1	1
0.0001064153973692535-2	NC_044371.1	62223401	62224799	+	53.0616	1398	Intergenic	Intergenic	31568	LOC115704194	LOC115704194	XM_030631410	uncharacterized LOC115704194	protein_coding	NA	NA	NA	NA	NA	NA
0.0001064153973692535	NC_044370.1	68850001	68851399	+	53.0616	1398	Intergenic	Intergenic	-76910	LOC115723731	LOC115723731	XM_030653211	uncharacterized LOC115723731	protein_coding	NA	NA	NA	NA	NA	NA
0.0001064153973692535-3	NC_044372.1	32411001	32412799	+	53.0616	1798	Intergenic	Intergenic	32059	LOC115710622	LOC115710622	XM_030638980	uncharacterized LOC115710622	protein_coding	NA	NA	NA	NA	NA	NA
4.6342102408036745e-06	NC_044373.1	28554801	28556999	+	52.9723	2198	Intergenic	Intergenic	118891	LOC115714558	LOC115714558	XM_030643293	pentatricopeptide repeat-containing protein At1g28690, mitochondrial	protein_coding	-0.626313549	1	1	-0.251417908	1	1
0.00048817374387003686	NC_044377.1	35477001	35477999	+	52.8483	998	Intergenic	Intergenic	-16930	LOC115725213	LOC115725213	XM_030654651	aluminum-activated malate transporter 9	protein_coding	0.268266911	1	1	0.4000832	1	1
9.937750539424399e-05	NC_044373.1	2597401	2598999	+	52.8322	1598	Intergenic	Intergenic	4513	LOC115714191	LOC115714191	XM_030642770	uncharacterized LOC115714191	protein_coding	-0.087528512	1	1	0.139647117	1	1
0.0002158858179091146	NC_044373.1	82387401	82388599	+	52.7762	1198	Intergenic	Intergenic	7107	LOC115714730	LOC115714730	XR_004011111	uncharacterized LOC115714730	lncRNA	NA	NA	NA	NA	NA	NA
8.946253883473165e-08	NC_044376.1	46506001	46509599	+	52.7762	3598	Intergenic	Intergenic	-3458	LOC115723211	LOC115723211	XM_030652648	soluble starch synthase 3, chloroplastic/amyloplastic	protein_coding	1.291780618	0.135335411	0.565063555	1.275675967	0.158285708	0.755206298
9.602417639907813e-05	NW_022060498.1	493401	494799	+	52.7207	1398	Intergenic	Intergenic	-11789	LOC115702220	LOC115702220	XR_004008823	#N/A	snoRNA	NA	NA	NA	NA	NA	NA
4.291168096734268e-05	NC_044375.1	30178001	30179199	+	52.6767	1198	exon	-exon (LOC115720014, exon 1 of 3)	487	LOC115720014	LOC115720014	XM_030649182	uncharacterized LOC115720014	protein_coding	NA	NA	NA	NA	NA	NA
9.277726583471864e-05-2	NW_022060459.1	74601	75999	+	52.6112	1398	NA	NA	NA	NA			#N/A		NA	NA	NA	NA	NA	NA
9.277726583471864e-05	NC_044376.1	17652801	17654799	+	52.6112	1998	Intergenic	Intergenic	12850	LOC115722009	LOC115722009	XM_030651125	vacuolar protein sorting-associated protein 45 homolog,	protein_coding	NA	NA	NA	NA	NA	NA
0.00045544731521767883	NC_044377.1	34179001	34179999	+	52.5649	998	Intergenic	Intergenic	-3380	LOC115695110	LOC115695110	XM_030622200	uncharacterized LOC115695110	protein_coding	NA	NA	NA	NA	NA	NA
0.0010013501866137319	NC_044373.1	66637401	66638199	+	52.4507	798	Intergenic	Intergenic	-12321	TRNAR-UCU_3	TRNAR-UCU_3	TRNAR-UCU_3	#N/A	tRNA	NA	NA	NA	NA	NA	NA
3.4057101725592266e-07	NC_044377.1	4415401	4418599	+	52.4113	3198	exon	-exon (LOC115725470, exon 3 of 3)	2626	LOC115725470	LOC115725470	XM_030655003	protein SUPPRESSOR OF MAX2 1	protein_coding	0.870163462	1	1	-0.078994699	1	1
7.556772007973581e-06	NC_044373.1	49432001	49433799	+	52.2945	1798	Intergenic	Intergenic	-63575	LOC115715108	LOC115715108	XM_030643918	NDR1/HIN1-like protein 13	protein_coding	-0.833835692	1	1	-2.553824731	0.097470535	0.518162639
3.296960101320453e-06	NC_044376.1	47208801	47211799	+	52.2238	2998	Intergenic	Intergenic	11774	LOC115723876	LOC115723876	XM_030653341	uncharacterized LOC115723876	protein_coding	NA	NA	NA	NA	NA	NA
0.00041014361529956425	NC_044376.1	6164201	6165199	+	52.1639	998	Intergenic	Intergenic	58803	LOC115723511	LOC115723511	XM_030653007	#N/A	protein_coding	1.066256768	0.785887335	1	0.98915432	1	1
0.0009332918019450464	NC_044370.1	65544601	65545599	+	52.1424	998	Intergenic	Intergenic	-55272	LOC115723436	LOC115723436	XM_030652927	uncharacterized LOC115723436	protein_coding	NA	NA	NA	NA	NA	NA
0.0009332918019450464-2	NC_044370.1	82884801	82885599	+	52.1424	798	Intergenic	Intergenic	-172806	LOC115723607	LOC115723607	XM_030653092	GDSL esterase/lipase EXL3	protein_coding	-3.020426114	0.009942806	0.06191466	-3.614658677	0.000844123	0.010066114
0.0009332918019450464-3	NC_044371.1	11742601	11743599	+	52.1424	998	Intergenic	Intergenic	-6803	LOC115703766	LOC115703766	XM_030630999	uncharacterized LOC115703766	protein_coding	NA	NA	NA	NA	NA	NA
0.0003960000847220105	NC_044374.1	31121001	31122199	+	52.0362	1198	Intergenic	Intergenic	-33000	LOC115717703	LOC115717703	XM_030646683	hepatitis A virus cellular receptor 1-like	protein_coding	NA	NA	NA	NA	NA	NA
2.4560935635185064e-08	NC_044372.1	56649401	56652399	+	52.0096	2998	TTS	-TTS (LOC115711509)	4061	LOC115711509	LOC115711509	XM_030639855	kinesin-like protein KIN-8A	protein_coding	-2.056707712	0.288710773	1	-3.322296676	0.017400827	0.128159427
0.0020683209084737387	NC_044373.1	73031201	73031999	+	51.936	798	promoter-TSS	-promoter-TSS (LOC115713665)	-1489	LOC115713665	LOC115713665	XM_030642150	putative U-box domain-containing protein 50	protein_coding	NA	NA	NA	NA	NA	NA
7.27884677390115e-05	NC_044371.1	95525001	95526599	+	51.8976	1598	Intergenic	Intergenic	4539	LOC115704608	LOC115704608	XM_030631809	uncharacterized LOC115704608	protein_coding	NA	NA	NA	NA	NA	NA
0.0008695184271602625-2	NC_044378.1	31265201	31266199	+	51.8499	998	Intergenic	Intergenic	-21681	LOC115697279	LOC115697279	XM_030624218	UDP-arabinose 4-epimerase 1,	protein_coding	0.153630174	1	1	-0.026389832	1	1
0.0008695184271602625	NC_044372.1	52726201	52727199	+	51.8499	998	Intergenic	Intergenic	104079	LOC115710762	LOC115710762	XM_030639115	uncharacterized LOC115710762	protein_coding	NA	NA	NA	NA	NA	NA
1.364130289875921e-05	NC_044374.1	45800201	45802599	+	51.8112	2398	Intergenic	Intergenic	-5774	LOC115717791	LOC115717791	XM_030646765	uncharacterized LOC115717791	protein_coding	NA	NA	NA	NA	NA	NA
0.00036907306894571435	NC_044377.1	53098801	53099999	+	51.7892	1198	Intergenic	Intergenic	-10660	LOC115694852	LOC115694852	XR_004007496	uncharacterized LOC115694852	lncRNA	NA	NA	NA	NA	NA	NA
3.0372876444700117e-05	NC_044371.1	22206801	22209399	+	51.7651	2598	Intergenic	Intergenic	-26665	LOC115708437	LOC115708437	XR_004009937	small nucleolar RNA R71	snoRNA	NA	NA	NA	NA	NA	NA
0.00015781495827342425	NW_022060454.1	842401	844199	+	51.744	1798	Intergenic	Intergenic	339142	LOC115702127	LOC115702127	XM_030629586	#N/A	protein_coding	1.214863418	0.74862229	1	1.078418672	0.906335909	1
0.0008391708831588064	NC_044370.1	37472001	37472799	+	51.7092	798	Intergenic	Intergenic	138382	LOC115720202	LOC115720202	XM_030649358	uncharacterized LOC115720202	protein_coding	1.46983689	0.855480266	NA	-0.833370229	1	NA
6.328258105461601e-05	NC_044372.1	2802801	2804399	+	51.5271	1598	Intergenic	Intergenic	-3028	LOC115709191	LOC115709191	XM_030637245	FBD-associated F-box protein At3g52670-like	protein_coding	-1.224150556	0.42697587	1	-0.592055671	1	1
6.328258105461601e-05-2	NC_044372.1	81460201	81461999	+	51.5271	1798	TTS	-TTS (LOC115709094)	-2993	LOC115711007	LOC115711007	XM_030639352	uncharacterized LOC115711007	protein_coding	NA	NA	NA	NA	NA	NA
2.179138742745462e-06	NC_044372.1	45207001	45208599	+	51.4383	1598	Intergenic	Intergenic	-44257	LOC115709619	LOC115709619	XM_030637758	cytochrome P450 78A5	protein_coding	1.337509265	0.472147049	1	0.683181169	1	1
0.00014199401634839356	NC_044379.1	12346001	12348599	+	51.4383	2598	intron	-intron (LOC115701551, intron 1 of 2)	7782	LOC115701551	LOC115701551	XM_030629367	1-aminocyclopropane-1-carboxylate oxidase-like	protein_coding	0	1	NA	-2.856059119	0.620453498	NA
0.0003318966179063823	NC_044370.1	79589201	79590199	+	51.4383	998	Intergenic	Intergenic	13936	LOC115720088	LOC115720088	XM_030649255	uncharacterized LOC115720088,	protein_coding	-0.978932417	1	1	-0.321462579	1	1
0.0007539620270865287	NC_044377.1	21528601	21529599	+	51.3078	998	Intergenic	Intergenic	-48396	LOC115724936	LOC115724936	XR_004013315	uncharacterized LOC115724936	lncRNA	-0.544423477	1	1	-0.561252745	1	1
2.4625007073730123e-05	NC_044379.1	53560801	53562799	+	51.2821	1998	Intergenic	Intergenic	-9414	LOC115698864	LOC115698864	XM_030626070	G-type lectin S-receptor-like serine/threonine-protein kinase At4g03230	protein_coding	-2.916836442	2.3353E-05	0.000266734	-1.342032536	0.456399803	1
5.694648324698998e-05-2	NC_044379.1	11436001	11437799	+	51.265	1798	Intergenic	Intergenic	-14923	LOC115701232	LOC115701232	XM_030628975	transcription initiation factor TFIID subunit 9	protein_coding	0.241291447	1	1	0.293121804	1	1
5.694648324698998e-05	NC_044372.1	57392201	57394399	+	51.265	2198	Intergenic	Intergenic	-41872	LOC115711795	LOC115711795	XR_004010669	small nucleolar RNA R71	snoRNA	NA	NA	NA	NA	NA	NA
0.0003091147331255591	NC_044370.1	68580001	68581199	+	51.2165	1198	Intergenic	Intergenic	30313	LOC115706750	LOC115706750	XR_004009636	uncharacterized LOC115706750	lncRNA	NA	NA	NA	NA	NA	NA
0.0003091147331255591-2	NC_044377.1	58574401	58575599	+	51.2165	1198	Intergenic	Intergenic	-24412	LOC115695710	LOC115695710	XM_030622782	uroporphyrinogen-III C-methyltransferase	protein_coding	0.126089929	1	1	0.848198634	1	1
0.00012769461860580032-2	NC_044379.1	19485201	19486399	+	51.1491	1198	Intergenic	Intergenic	-57261	LOC115699903	LOC115699903	XM_030627447	uncharacterized LOC115699903	protein_coding	-0.374376113	1	NA	0	1	NA
0.00012769461860580032	NC_044378.1	29243801	29244999	+	51.1491	1198	Intergenic	Intergenic	40202	LOC115696910	LOC115696910	XM_030623810	uncharacterized LOC115696910	protein_coding	NA	NA	NA	NA	NA	NA
5.306645393489922e-05	NC_044375.1	94762801	94763999	+	51.0972	1198	Intergenic	Intergenic	-5973	LOC115720543	LOC115720543	XM_030649687	spermidine coumaroyl-CoA acyltransferase-like	protein_coding	-0.988269713	1	1	-4.079259162	0.007787655	0.065503161
9.622883371818564e-06	NC_044373.1	55298201	55300199	+	51.0897	1998	Intergenic	Intergenic	-38632	LOC115714572	LOC115714572	XR_004011079	uncharacterized LOC115714572	lncRNA	-2.082512083	0.193519856	0.749945517	-0.800741062	1	1
0.00012324281217529148-2	NW_022060476.1	949601	951199	+	51.0561	1598	Intergenic	Intergenic	218600	LOC115702188	LOC115702188	XM_030629636	#N/A	protein_coding	NA	NA	NA	NA	NA	NA
0.00012324281217529148	NC_044375.1	10638801	10640399	+	51.0561	1598	Intergenic	Intergenic	64720	LOC115719847	LOC115719847	XM_030649033	uncharacterized LOC115719847	protein_coding	NA	NA	NA	NA	NA	NA
0.0002878269569792593	NC_044379.1	42055801	42057399	+	51.0037	1598	Intergenic	Intergenic	9879	LOC115700584	LOC115700584	XM_030628176	uncharacterized LOC115700584,	protein_coding	-0.002029309	1	1	0.535626548	1	1
1.6489593029977307e-06	NC_044375.1	44624601	44626799	+	50.9718	2198	Intergenic	Intergenic	-84387	LOC115720120	LOC115720120	XM_030649281	uncharacterized LOC115720120	protein_coding	-0.469670029	1	1	-0.689331956	1	1
0.00011894034393683687	NC_044377.1	16593401	16594799	+	50.9648	1398	Intergenic	Intergenic	10478	LOC115725582	LOC115725582	XM_030655155	ribosome biogenesis regulatory protein homolog	protein_coding	-0.368161027	1	1	0.473394165	1	1
4.944209109221459e-05	NC_044370.1	56689801	56691799	+	50.9347	1998	promoter-TSS	-promoter-TSS (LOC115722119)	10	LOC115722119	LOC115722119	XM_030651246	uncharacterized LOC115722119	protein_coding	NA	NA	NA	NA	NA	NA
8.660109360223294e-06	NC_044373.1	79479401	79480999	+	50.8913	1598	intron	-intron (LOC115712047, intron 3 of 4)	5666	LOC115712048	LOC115712048	XM_030640256	thaumatin-like protein 1	protein_coding	4.865551154	0.015729866	0.091963267	-0.989800348	1	1
3.5180202750287775e-06	NC_044375.1	24574001	24575599	+	50.8162	1598	Intergenic	Intergenic	17615	LOC115721576	LOC115721576	XR_004012591	small nucleolar RNA R71	snoRNA	NA	NA	NA	NA	NA	NA
1.4845518782659705e-06	NC_044376.1	50631801	50635199	+	50.8072	3398	promoter-TSS	-promoter-TSS (LOC115722824)	-893	LOC115722824	LOC115722824	XM_030652158	F-box protein SKIP16	protein_coding	-0.999824113	1	1	-0.286471813	1	1
1.9242517182928363e-05	NC_044370.1	32389601	32391599	+	50.7695	1998	exon	-exon (LOC115710018, exon 1 of 1)	1884	LOC115710018	LOC115710018	XM_030638316	trihelix transcription factor ASIL2	protein_coding	0.623457692	1	1	0.319500481	1	1
0.0015492754882381755	NC_044377.1	74371801	74372599	+	50.7003	798	Intergenic	Intergenic	-9877	LOC115725780	LOC115725780	XM_030655389	DNA replication licensing factor MCM4	protein_coding	-3.450616987	0.000496916	0.004401942	-1.136675364	0.846895635	1
0.00010688334052876159	NC_044379.1	22572001	22574199	+	50.7003	2198	intron	-intron (LOC115698491, intron 1 of 4)	9005	LOC115701618	LOC115701618	XR_004008611	small nucleolar RNA R71	snoRNA	NA	NA	NA	NA	NA	NA
4.4450606264810276e-05	NC_044370.1	68771001	68772799	+	50.7003	1798	Intergenic	Intergenic	35524	LOC115703351	LOC115703351	XR_004009123	small nucleolar RNA R71	snoRNA	NA	NA	NA	NA	NA	NA
0.00025850454669041744	NC_044371.1	84573401	84574599	+	50.7003	1198	Intergenic	Intergenic	-4410	LOC115708541	LOC115708541	XR_004010032	small nucleolar RNA R71	snoRNA	NA	NA	NA	NA	NA	NA
0.0006298209821934695-2	NC_044378.1	41563001	41563999	+	50.7003	998	Intergenic	Intergenic	-37435	LOC115696575	LOC115696575	XM_030623469	uncharacterized LOC115696575	protein_coding	NA	NA	NA	NA	NA	NA
7.791338642024035e-06	NC_044377.1	61115601	61118199	+	50.7003	2598	Intergenic	Intergenic	-47615	LOC115695319	LOC115695319	XM_030622394	uncharacterized LOC115695319	protein_coding	NA	NA	NA	NA	NA	NA
2.4825256859941807e-07	NC_044375.1	25898801	25901599	+	50.7003	2798	Intergenic	Intergenic	14166	LOC115720623	LOC115720623	XM_030649786	3beta-hydroxysteroid-dehydrogenase/decarboxylase	protein_coding	-0.882064807	1	1	0.175106892	1	1
0.0006298209821934695	NC_044375.1	28127801	28128799	+	50.7003	998	Intergenic	Intergenic	9581	LOC115719998	LOC115719998	XM_030649167	uncharacterized LOC115719998	protein_coding	-0.374376113	1	NA	0	1	NA
4.4450606264810276e-05-2	NC_044376.1	43229801	43231599	+	50.7003	1798	Intergenic	Intergenic	-45407	LOC115722561	LOC115722561	XM_030651802	uncharacterized LOC115722561	protein_coding	0.174283054	1	1	-0.036571188	1	1
3.056115975054294e-06	NC_044374.1	30902801	30905799	+	50.5871	2998	intron	-intron (LOC115717702, intron 2 of 6)	25712	LOC115717702	LOC115717702	XM_030646682	uncharacterized LOC115717702	protein_coding	0	1	NA	-0.410947537	1	NA
0.0014937463254204115	NC_044377.1	39317601	39318399	+	50.5648	798	Intergenic	Intergenic	46284	LOC115724635	LOC115724635	XM_030653967	uncharacterized LOC115724635	protein_coding	0.456086409	1	1	0.149371451	1	1
4.139815108331928e-05	NC_044378.1	5757601	5759599	+	50.55	1998	intron	-intron (LOC115696440, intron 3 of 4)	8986	LOC115696440	LOC115696440	XM_030623341	tropinone reductase homolog At5g06060-like	protein_coding	3.961449403	3.53008E-05	0.000389545	-0.997467905	1	1
1.202415803498165e-06	NC_044377.1	74416401	74417999	+	50.4933	1598	Intergenic	Intergenic	-9362	LOC115724523	LOC115724523	XM_030653820	cysteine protease RD19A	protein_coding	0.402000673	1	1	-0.973565015	1	1
0.0005858322832947416	NW_022060522.1	14001	15399	+	50.4765	1398	Intergenic	Intergenic	-4590	LOC115702294	LOC115702294	XM_030629742	#N/A	protein_coding	NA	NA	NA	NA	NA	NA
1.160806603017436e-06-2	NC_044377.1	15814001	15815999	+	50.4429	1998	Intergenic	Intergenic	20803	LOC115695006	LOC115695006	XM_030622105	uncharacterized LOC115695006	protein_coding	NA	NA	NA	NA	NA	NA
1.160806603017436e-06	NC_044374.1	15121401	15123999	+	50.4429	2598	TTS	-TTS (LOC115717315)	1150	LOC115717315	LOC115717315	XR_004011732	uncharacterized LOC115717315	lncRNA	NA	NA	NA	NA	NA	NA
0.0014401056149433247	NC_044375.1	32278201	32279199	+	50.4329	998	Intergenic	Intergenic	7732	LOC115718786	LOC115718786	XM_030647612	AT-hook motif nuclear-localized protein 19	protein_coding	-0.191686572	1	NA	0.550842823	1	NA
0.0014401056149433247-2	NW_022060359.1	70601	71599	+	50.4329	998	NA	NA	NA	NA			#N/A		NA	NA	NA	NA	NA	NA
0.00023206397285313555-2	NC_044377.1	56831201	56832799	+	50.4144	1598	Intergenic	Intergenic	172616	LOC115696010	LOC115696010	XR_004007612	small nucleolar RNA R71	snoRNA	NA	NA	NA	NA	NA	NA
0.00023206397285313555	NC_044373.1	40263401	40264399	+	50.4144	998	Intergenic	Intergenic	-3894	LOC115712709	LOC115712709	XM_030641045	translocator protein homolog	protein_coding	0.197179772	1	1	-1.002663859	0.99436213	1
8.25474520942298e-08	NC_044373.1	67921001	67925399	+	50.4086	4398	Intergenic	Intergenic	3829	LOC115713608	LOC115713608	XM_030642099	uncharacterized LOC115713608	protein_coding	NA	NA	NA	NA	NA	NA
1.555423580606135e-05	NC_044374.1	53372601	53374999	+	50.3683	2398	Intergenic	Intergenic	59893	LOC115717845	LOC115717845	XM_030646816	uncharacterized LOC115717845	protein_coding	NA	NA	NA	NA	NA	NA
3.719791626568312e-05	NC_044377.1	40945001	40946599	+	50.3328	1598	Intergenic	Intergenic	-29992	LOC115725313	LOC115725313	XR_004013366	uncharacterized LOC115725313	lncRNA	NA	NA	NA	NA	NA	NA
8.936635780294177e-05	NC_044370.1	59844801	59846599	+	50.2887	1798	Intergenic	Intergenic	18043	LOC115702510	LOC115702510	XR_004008903	uncharacterized LOC115702510	lncRNA	NA	NA	NA	NA	NA	NA
8.936635780294177e-05-2	NC_044376.1	39991801	39992999	+	50.2887	1198	Intergenic	Intergenic	-73930	LOC115723092	LOC115723092	XM_030652509	probable peroxidase 61	protein_coding	0	1	1	-7.210690342	5.63565E-06	0.000116992
1.4485555601304574e-05	NC_044372.1	81446201	81448599	+	50.2416	2398	Intergenic	Intergenic	10707	LOC115711007	LOC115711007	XM_030639352	uncharacterized LOC115711007	protein_coding	NA	NA	NA	NA	NA	NA
8.840156504411366e-10	NC_044377.1	7907401	7910599	+	50.2327	3198	Intergenic	Intergenic	-10935	LOC115725443	LOC115725443	XM_030654961	AP2/ERF and B3 domain-containing transcription factor At1g50680,	protein_coding	-0.600040837	1	1	-1.11052481	0.637533945	1
8.621367670510602e-05-2	NC_044375.1	64413801	64415599	+	50.2104	1798	Intergenic	Intergenic	-30738	LOC115718790	LOC115718790	XM_030647615	sulfite reductase [ferredoxin], chloroplastic	protein_coding	0.875031067	1	1	1.465521297	0.002456922	0.024870676
8.621367670510602e-05	NC_044374.1	85551801	85553399	+	50.2104	1598	Intergenic	Intergenic	-24696	LOC115716182	LOC115716182	XM_030644921	uncharacterized LOC115716182	protein_coding	-2.148277376	0.003082854	0.022120827	-2.012420156	0.009106107	0.074678623
2.386426137843207e-06	NC_044370.1	90742801	90745999	+	50.2104	3198	Intergenic	Intergenic	-2572	LOC115703318	LOC115703318	XR_004009093	small nucleolar RNA R71	snoRNA	NA	NA	NA	NA	NA	NA
3.46314194269952e-05	NC_044378.1	38476001	38476999	+	50.1932	998	intron	-intron (LOC115696550, intron 3 of 3)	2723	LOC115696550	LOC115696550	XM_030623446	uncharacterized LOC115696550	protein_coding	NA	NA	NA	NA	NA	NA
0.001338268648403342-2	NC_044377.1	47133401	47134399	+	50.1795	998	Intergenic	Intergenic	-33937	LOC115695223	LOC115695223	XM_030622304	uncharacterized LOC115695223	protein_coding	NA	NA	NA	NA	NA	NA
0.001338268648403342	NC_044373.1	35109801	35110799	+	50.1795	998	Intergenic	Intergenic	114406	LOC115711932	LOC115711932	XM_030640128	cell wall / vacuolar inhibitor of fructosidase 2	protein_coding	-2.79423286	0.000306182	0.002825604	-1.923261377	0.069456342	0.397345041
1.3978460688573416e-05	NC_044377.1	66886201	66888599	+	50.1795	2398	Intergenic	Intergenic	5259	LOC115724638	LOC115724638	XM_030653970	receptor-like protein EIX2	protein_coding	-1.95433151	0.082946904	0.378738321	-1.447576669	0.418617147	1
0.000208242824532808	NC_044373.1	59073601	59074999	+	50.1444	1398	Intergenic	Intergenic	-17713	LOC115715097	LOC115715097	XM_030643898	protein STRUBBELIG-RECEPTOR FAMILY 5,	protein_coding	0.497118383	1	1	-0.073285966	1	1
8.31692022176767e-05	NC_044372.1	20730001	20731799	+	50.1335	1798	Intergenic	Intergenic	-50848	LOC115711566	LOC115711566	XM_030639921	protein Asterix,	protein_coding	-0.149959453	1	1	0.462041095	1	1
3.341375161678144e-05	NC_044373.1	69824601	69826399	+	50.125	1798	Intergenic	Intergenic	-34449	LOC115714659	LOC115714659	XM_030643409	auxin-responsive protein IAA8	protein_coding	0.448088178	1	1	0.23043117	1	1
3.341375161678144e-05-2	NC_044374.1	22791601	22793799	+	50.125	2198	Intergenic	Intergenic	-31113	LOC115716848	LOC115716848	XM_030645754	BAG family molecular chaperone regulator 1,	protein_coding	2.284905761	2.02765E-08	3.74065E-07	1.238669214	0.293230093	1
1.3488735316363803e-05	NC_044370.1	30679001	30680999	+	50.1182	1998	Intergenic	Intergenic	5326	LOC115709724	LOC115709724	XM_030637906	protein MITOFERRINLIKE 1, chloroplastic	protein_coding	-0.010317849	1	1	0.062769371	1	1
0.0005065306691175793	NC_044374.1	389601	390599	+	50.0577	998	Intergenic	Intergenic	-7998	LOC115716501	LOC115716501	XM_030645312	calmodulin-interacting protein 111	protein_coding	0.02537704	1	1	0.141820998	1	1
5.2758166285468895e-06	NC_044379.1	7186801	7189399	+	50.0577	2598	Intergenic	Intergenic	143650	LOC115699785	LOC115699785	XM_030627331	uncharacterized LOC115699785	protein_coding	NA	NA	NA	NA	NA	NA
0.00019369657601316299-2	NC_044378.1	64675801	64677599	+	49.9726	1798	Intergenic	Intergenic	111050	LOC115697921	LOC115697921	XR_004008003	uncharacterized LOC115697921	lncRNA	NA	NA	NA	NA	NA	NA
0.00019369657601316299	NC_044378.1	28034401	28035799	+	49.9726	1398	Intergenic	Intergenic	4948	LOC115696995	LOC115696995	XM_030623891	uncharacterized LOC115696995	protein_coding	-1.121763237	0.534065529	1	-0.157163106	1	1
0.0004883834729872439	NC_044372.1	51250001	51251199	+	49.9586	1198	Intergenic	Intergenic	-40772	LOC115709149	LOC115709149	XM_030637183	UPF0481 protein At3g47200	protein_coding	-0.374399795	1	NA	-2.293764971	0.74473371	NA
4.913103971751349e-06-2	NC_044371.1	55190201	55192599	+	49.9497	2398	Intergenic	Intergenic	268535	LOC115707541	LOC115707541	XM_030635546	tRNA:m(4)X modification enzyme TRM13,	protein_coding	-0.007503496	1	1	0.377874846	1	1
4.913103971751349e-06	NC_044370.1	88532801	88535199	+	49.9497	2398	Intergenic	Intergenic	-31210	LOC115703272	LOC115703272	XR_004009049	small nucleolar RNA R71	snoRNA	NA	NA	NA	NA	NA	NA
0.0012433313282735154	NC_044378.1	55614801	55615799	+	49.939	998	Intergenic	Intergenic	-18137	LOC115697155	LOC115697155	XR_004007906	uncharacterized LOC115697155	lncRNA	3.030794251	0.400887827	NA	1.16939807	0.942533848	NA
7.465033462271497e-05	NC_044375.1	52082201	52084199	+	49.9098	1998	Intergenic	Intergenic	34776	LOC115721573	LOC115721573	XR_004012588	small nucleolar RNA R71	snoRNA	NA	NA	NA	NA	NA	NA
1.9287062434955885e-06	NC_044377.1	40841001	40843799	+	49.9098	2798	Intergenic	Intergenic	73408	LOC115725313	LOC115725313	XR_004013366	uncharacterized LOC115725313	lncRNA	NA	NA	NA	NA	NA	NA
7.200450109741875e-05	NC_044376.1	44442801	44444399	+	49.8376	1598	exon	-exon (LOC115723852, exon 1 of 1)	598	LOC115723852	LOC115723852	XM_030653317	uncharacterized LOC115723852	protein_coding	NA	NA	NA	NA	NA	NA
0.00018013897586267093	NC_044378.1	6169801	6170799	+	49.807	998	Intergenic	Intergenic	7177	LOC115697716	LOC115697716	XM_030624813	aspartic proteinase PCS1	protein_coding	3.483479627	9.58194E-21	6.32968E-19	-0.241029499	1	1
6.945027278314288e-05	NC_044373.1	50185201	50186999	+	49.7665	1798	Intergenic	Intergenic	-5297	LOC115713498	LOC115713498	XM_030641981	uncharacterized LOC115713498	protein_coding	NA	NA	NA	NA	NA	NA
0.00017371092472671397	NC_044374.1	73048201	73049799	+	49.7264	1598	Intergenic	Intergenic	-3989	LOC115717973	LOC115717973	XM_030646943	uncharacterized LOC115717973	protein_coding	1.549149972	0.892943525	NA	-0.800795602	1	NA
6.698461713843056e-05	NC_044378.1	45497401	45498799	+	49.6966	1398	Intergenic	Intergenic	-4363	TRNAK-UUU_11	TRNAK-UUU_11	TRNAK-UUU_11	#N/A	tRNA	NA	NA	NA	NA	NA	NA
6.460459275306882e-05	NC_044375.1	64772001	64773399	+	49.6277	1398	Intergenic	Intergenic	-25046	LOC115718474	LOC115718474	XM_030647260	uncharacterized LOC115718474,	protein_coding	2.386295855	6.50895E-05	0.000682605	-0.02199611	1	1
2.5067346365372584e-05	NC_044375.1	46227201	46229199	+	49.6125	1998	Intergenic	Intergenic	-23318	LOC115718976	LOC115718976	XM_030647811	protein SMG7,	protein_coding	0.426949244	1	1	0.652003569	1	1
2.4228282152197303e-07	NC_044373.1	55932601	55936199	+	49.6082	3598	Intergenic	Intergenic	-5166	LOC115713517	LOC115713517	XM_030641999	uncharacterized LOC115713517	protein_coding	0	1	NA	-0.410947537	1	NA
9.773912056531956e-06	NC_044375.1	88834401	88835599	+	49.6004	1198	Intergenic	Intergenic	-24964	LOC115720466	LOC115720466	XM_030649613	uncharacterized LOC115720466	protein_coding	NA	NA	NA	NA	NA	NA
3.8262747578028686e-06	NC_044372.1	64418801	64421599	+	49.5906	2798	Intergenic	Intergenic	-19133	LOC115710144	LOC115710144	XR_004010355	uncharacterized LOC115710144	lncRNA	-0.575722062	1	1	-1.425309831	0.721691113	1
2.4179864269162158e-05	NC_044376.1	14867801	14869999	+	49.5524	2198	intron	-intron (LOC115722027, intron 8 of 14)	15636	LOC115722027	LOC115722027	XM_030651143	fanconi-associated nuclease 1 homolog	protein_coding	0.521435803	1	1	0.678191155	1	1
0.0010725000037480291	NC_044374.1	45051001	45051999	+	49.493	998	Intergenic	Intergenic	-10119	LOC115717783	LOC115717783	XM_030646758	uncharacterized LOC115717783	protein_coding	NA	NA	NA	NA	NA	NA
0.0010725000037480291-2	NC_044378.1	58030201	58031599	+	49.493	1398	Intergenic	Intergenic	-20205	LOC115697945	LOC115697945	XM_030625122	probable small nuclear ribonucleoprotein F	protein_coding	-0.346736016	1	1	-0.175863994	1	1
0.0004066867237231266	NC_044374.1	34823601	34824799	+	49.493	1198	Intergenic	Intergenic	-113664	LOC115717435	LOC115717435	XM_030646422	uncharacterized LOC115717435	protein_coding	0.162737964	1	1	0.183229092	1	1
5.795021626808122e-05	NC_044379.1	8274801	8277199	+	49.4272	2398	exon	-exon (LOC115700926, exon 2 of 4)	963	LOC115700926	LOC115700926	XM_030628604	pectate lyase-like	protein_coding	-0.127482311	1	1	-3.493317303	0.032264735	0.213944465
2.1698377618598545e-05	NW_022060476.1	177801	178999	+	49.3767	1198	Intergenic	Intergenic	-553400	LOC115702188	LOC115702188	XM_030629636	#N/A	protein_coding	NA	NA	NA	NA	NA	NA
3.1985182492976452e-06	NC_044373.1	36499801	36500999	+	49.3507	1198	Intergenic	Intergenic	-8885	LOC115713369	LOC115713369	XM_030641850	uncharacterized LOC115713369	protein_coding	NA	NA	NA	NA	NA	NA
1.8224996513301714e-07	NC_044376.1	38865201	38866599	+	49.3076	1398	Intergenic	Intergenic	-18932	LOC115724302	LOC115724302	XR_004013100	small nucleolar RNA R71	snoRNA	NA	NA	NA	NA	NA	NA
0.0009958211387736727	NC_044371.1	24255801	24256799	+	49.2859	998	Intergenic	Intergenic	-7340	LOC115703915	LOC115703915	XM_030631150	uncharacterized LOC115703915	protein_coding	NA	NA	NA	NA	NA	NA
7.876757081424694e-06	NC_044370.1	70068001	70069999	+	49.2859	1998	Intergenic	Intergenic	-11929	LOC115713766	LOC115713766	XM_030642252	probable serine/threonine-protein kinase PBL11	protein_coding	-1.423704274	0.419364465	1	-2.110179883	0.033709064	0.221990181
1.1701477841397688e-06-2	NW_022060454.1	243201	244599	+	49.2775	1398	Intergenic	Intergenic	-260258	LOC115702127	LOC115702127	XM_030629586	#N/A	protein_coding	1.214863418	0.74862229	1	1.078418672	0.906335909	1
1.1701477841397688e-06	NC_044377.1	6783801	6786399	+	49.2775	2598	Intergenic	Intergenic	-7167	LOC115696062	LOC115696062	XR_004007660	small nucleolar RNA R71	snoRNA	NA	NA	NA	NA	NA	NA
0.0003642192102453932	NC_044377.1	73994801	73996199	+	49.2357	1398	Intergenic	Intergenic	17800	LOC115725094	LOC115725094	XM_030654518	cucumber peeling cupredoxin	protein_coding	1.599802273	0.00459125	0.031531834	-0.483597398	1	1
0.00013457727248041484	NC_044374.1	26838801	26840799	+	49.2001	1998	Intergenic	Intergenic	37799	LOC115717677	LOC115717677	XM_030646658	uncharacterized LOC115717677	protein_coding	NA	NA	NA	NA	NA	NA
6.258352870899542e-08	NC_044376.1	8116201	8117599	+	49.186	1398	Intergenic	Intergenic	8798	LOC115722299	LOC115722299	XM_030651472	uncharacterized LOC115722299,	protein_coding	-0.52430744	1	1	-0.13422004	1	1
0.0009595031254151232-2	NC_044374.1	4128601	4129799	+	49.186	1198	Intergenic	Intergenic	-5155	LOC115717346	LOC115717346	XM_030646316	probable thimet oligopeptidase	protein_coding	0.481936007	1	1	-0.507133793	1	1
7.3288579355650775e-06	NC_044370.1	2332601	2335399	+	49.186	2798	exon	-exon (LOC115702847, exon 4 of 4)	1347	LOC115702847	LOC115702847	XM_030630286	cysteine protease XCP1-like	protein_coding	-0.403967687	1	1	-1.991282203	0.30537262	1
0.0009595031254151232	NC_044373.1	9571001	9572199	+	49.186	1198	Intergenic	Intergenic	-15870	LOC115712131	LOC115712131	XM_030640370	uncharacterized LOC115712131,	protein_coding	-0.155176768	1	1	-0.126083252	1	1
6.039229897752929e-08	NC_044377.1	14385401	14388999	+	49.1532	3598	Intergenic	Intergenic	-87581	LOC115724470	LOC115724470	XM_030653762	nifU-like protein 3, chloroplastic	protein_coding	1.98813057	0.006329145	0.041758525	0.98677311	1	1
4.832257788973997e-05	NC_044377.1	44739001	44740399	+	49.1126	1398	Intergenic	Intergenic	28003	LOC115724713	LOC115724713	XM_030654051	AP3-complex subunit beta-A,	protein_coding	-0.173443515	1	1	-0.145144661	1	1
0.0008906904207056459-2	NC_044378.1	43420801	43421799	+	48.993	998	Intergenic	Intergenic	-11212	LOC115696588	LOC115696588	XM_030623481	uncharacterized LOC115696588	protein_coding	NA	NA	NA	NA	NA	NA
0.0008906904207056459	NC_044373.1	56395601	56396599	+	48.993	998	Intergenic	Intergenic	43982	LOC115714227	LOC115714227	XM_030642828	protein TONSOKU	protein_coding	-2.729044857	9.68608E-07	1.38127E-05	-1.981387712	0.005823952	0.051544122
0.00011624012945233612	NC_044373.1	19876801	19878199	+	48.9262	1398	Intergenic	Intergenic	-31611	LOC115715363	LOC115715363	XR_004011239	small nucleolar RNA R71	snoRNA	NA	NA	NA	NA	NA	NA
0.0008581114098597692-2	NC_044377.1	66566601	66567799	+	48.8997	1198	Intergenic	Intergenic	3251	LOC115695391	LOC115695391	XM_030622457	uncharacterized LOC115695391	protein_coding	1.013566812	0.989007358	1	2.142309288	0.296761391	1
0.0008581114098597692	NC_044377.1	48620401	48621599	+	48.8997	1198	Intergenic	Intergenic	-8732	LOC115695958	LOC115695958	XM_030623065	autophagy protein 5	protein_coding	-1.831249562	0.218641142	0.825470647	-0.155916905	1	1
4.176818389960078e-05	NC_044370.1	67706001	67707999	+	48.8768	1998	Intergenic	Intergenic	7106	LOC115723629	LOC115723629	XM_030653116	uncharacterized mitochondrial protein AtMg00310-like	protein_coding	NA	NA	NA	NA	NA	NA
0.0023749396093963684	NC_044378.1	49170001	49170799	+	48.8768	798	Intergenic	Intergenic	9632	LOC115698402	LOC115698402	XR_004008151	small nucleolar RNA R71	snoRNA	NA	NA	NA	NA	NA	NA
0.00011205348020997093	NC_044377.1	42097001	42098799	+	48.8604	1798	Intergenic	Intergenic	87836	LOC115725388	LOC115725388	XM_030654899	heterodimeric geranylgeranyl pyrophosphate synthase small subunit, chloroplastic	protein_coding	-3.007922982	0.001682105	0.01303835	-9.918164606	2.5458E-46	1.63127E-43
0.0003028714925259984-2	NC_044379.1	19446001	19447799	+	48.8388	1798	Intergenic	Intergenic	-39947	LOC115701208	LOC115701208	XM_030628936	agamous-like MADS-box protein AGL30,	protein_coding	2.091129062	3.78659E-06	4.93824E-05	1.543227667	0.01975188	0.142259423
0.0003028714925259984	NC_044377.1	61877001	61877999	+	48.8388	998	Intergenic	Intergenic	16944	LOC115695800	LOC115695800	XM_030622884	uncharacterized LOC115695800	protein_coding	NA	NA	NA	NA	NA	NA
5.4887828483180595e-06	NC_044377.1	31934001	31935399	+	48.8086	1398	Intergenic	Intergenic	-13380	LOC115725513	LOC115725513	XM_030655064	calcium/calmodulin-regulated receptor-like kinase 1,	protein_coding	-0.504628601	1	1	-0.590695122	1	1
1.456393900794389e-05	NC_044374.1	53528801	53530999	+	48.7886	2198	Intergenic	Intergenic	14091	LOC115716921	LOC115716921	XR_004011631	uncharacterized LOC115716921	lncRNA	-0.496049847	1	1	-0.622262041	1	1
7.076240081804416e-07	NW_022060470.1	37801	38999	+	48.7268	1198	Intergenic	Intergenic	-12928	LOC115702169	LOC115702169	XM_030629622	#N/A	protein_coding	NA	NA	NA	NA	NA	NA
9.572960797601594e-08	NC_044377.1	834201	836599	+	48.7006	2398	Intergenic	Intergenic	-7905	LOC115724450	LOC115724450	XM_030653736	uncharacterized LOC115724450	protein_coding	-2.137438699	0.698793006	NA	-2.224264702	0.676637833	NA
9.572960797601594e-08-2	NC_044377.1	38346201	38350399	+	48.7006	4198	Intergenic	Intergenic	-44522	LOC115724953	LOC115724953	XM_030654336	nudix hydrolase 19, chloroplastic	protein_coding	1.149853815	0.280767032	1	0.34325739	1	1
1.3542252051144997e-05-2	NC_044378.1	55874801	55877399	+	48.6902	2598	promoter-TSS	-promoter-TSS (LOC115696662)	-7	LOC115696662	LOC115696662	XM_030623551	uncharacterized LOC115696662	protein_coding	NA	NA	NA	NA	NA	NA
0.00028127549405392586	NC_044375.1	73262001	73264199	+	48.6902	2198	intron	-intron (LOC115718890, intron 1 of 2)	2852	LOC115718890	LOC115718890	XM_030647698	uncharacterized LOC115718890,	protein_coding	0.919966255	1	NA	0.560635279	1	NA
1.3542252051144997e-05	NC_044372.1	52491401	52494199	+	48.6902	2798	Intergenic	Intergenic	13298	LOC115711402	LOC115711402	XM_030639736	glycosyltransferase BC10-like	protein_coding	NA	NA	NA	NA	NA	NA
0.00010036310475403338	NC_044377.1	30502201	30504399	+	48.6694	2198	Intergenic	Intergenic	143904	LOC115694802	LOC115694802	XR_004007471	uncharacterized LOC115694802,	lncRNA	NA	NA	NA	NA	NA	NA
0.002202029604099241	NW_022060454.1	879001	879799	+	48.6539	798	Intergenic	Intergenic	375242	LOC115702127	LOC115702127	XM_030629586	#N/A	protein_coding	1.214863418	0.74862229	1	1.078418672	0.906335909	1
0.00027105180017775887	NC_044372.1	60965801	60966999	+	48.618	1198	Intergenic	Intergenic	41952	LOC115710826	LOC115710826	XM_030639177	uncharacterized LOC115710826	protein_coding	NA	NA	NA	NA	NA	NA
9.32453278399876e-05	NC_044374.1	15826001	15827799	+	48.547	1798	Intergenic	Intergenic	32773	LOC115716671	LOC115716671	XM_030645522	calcium-dependent protein kinase 26-like	protein_coding	-0.680285972	1	1	-0.493807241	1	1
0.0002611934872256243	NC_044377.1	5812001	5813199	+	48.547	1198	Intergenic	Intergenic	46680	LOC115725320	LOC115725320	XM_030654800	serine-rich adhesin for platelets,	protein_coding	0.717747256	1	1	0.605232027	1	1
1.2141014969960185e-05	NC_044373.1	41352001	41353399	+	48.547	1398	Intergenic	Intergenic	33038	LOC115712294	LOC115712294	XM_030640556	pentatricopeptide repeat-containing protein At1g71060, mitochondrial	protein_coding	0.045971808	1	1	0.390329311	1	1
0.000739047558389806	NC_044377.1	67219001	67220599	+	48.547	1598	Intergenic	Intergenic	23153	LOC115695401	LOC115695401	XM_030622465	uncharacterized LOC115695401	protein_coding	NA	NA	NA	NA	NA	NA
0.00025168795368291346	NC_044376.1	25103401	25104799	+	48.4773	1398	Intergenic	Intergenic	41479	LOC115721856	LOC115721856	XM_030650945	G-type lectin S-receptor-like serine/threonine-protein kinase At4g27290	protein_coding	0.559131987	1	1	1.923213896	0.344605194	1
1.499963858337567e-06	NC_044370.1	76520401	76522799	+	48.4711	2398	Intergenic	Intergenic	62587	LOC115703387	LOC115703387	XR_004009155	small nucleolar RNA R71	snoRNA	NA	NA	NA	NA	NA	NA
0.0007119066285061223	NC_044373.1	58367201	58367999	+	48.4635	798	promoter-TSS	-promoter-TSS (LOC115712480)	-1644	LOC115712480	LOC115712480	XR_004010876	uncharacterized LOC115712480	lncRNA	-0.056925852	1	1	-0.093727875	1	1
0.0007119066285061223-2	NC_044379.1	19280401	19281999	+	48.4635	1598	Intergenic	Intergenic	67802	LOC115699472	LOC115699472	XM_030626900	expansin-A10	protein_coding	-1.125615049	0.807450766	1	-0.249361519	1	1
1.128748035306086e-05	NC_044374.1	50592601	50594999	+	48.4544	2398	Intergenic	Intergenic	-34835	LOC115717823	LOC115717823	XM_030646795	uncharacterized LOC115717823	protein_coding	NA	NA	NA	NA	NA	NA
3.9599702828380686e-06	NC_044373.1	81380601	81381599	+	48.4225	998	Intergenic	Intergenic	-6922	LOC115712347	LOC115712347	XR_004010845	uncharacterized LOC115712347	lncRNA	NA	NA	NA	NA	NA	NA
0.00024252299841783312	NC_044376.1	11265401	11266599	+	48.4089	1198	Intergenic	Intergenic	-9031	LOC115724249	LOC115724249	XR_004013049	small nucleolar RNA R71	snoRNA	NA	NA	NA	NA	NA	NA
1.0883241467751128e-05	NC_044370.1	16654801	16657199	+	48.4089	2398	Intergenic	Intergenic	-33347	LOC115704772	LOC115704772	XM_030631980	E3 ubiquitin-protein ligase UPL3	protein_coding	-0.144027319	1	1	-0.046697579	1	1
5.114185757358802e-07	NC_044372.1	66048401	66052799	+	48.4089	4398	Intergenic	Intergenic	2063	LOC115711770	LOC115711770	XR_004010646	small nucleolar RNA R71	snoRNA	NA	NA	NA	NA	NA	NA
0.00024252299841783312-2	NC_044377.1	29739601	29741199	+	48.4089	1598	Intergenic	Intergenic	12485	LOC115724533	LOC115724533	XM_030653831	65-kDa microtubule-associated protein 1	protein_coding	-1.048662497	0.700601904	1	-0.490257238	1	1
0.0006857443625489493-2	NC_044375.1	14113601	14114999	+	48.3818	1398	Intergenic	Intergenic	-42368	LOC115719665	LOC115719665	XM_030648787	leucine-rich repeat protein 1	protein_coding	-0.023634439	1	1	-0.176662566	1	1
0.0006857443625489493	NC_044372.1	51822001	51823199	+	48.3818	1198	Intergenic	Intergenic	-15780	LOC115708754	LOC115708754	XM_030636761	reticulon-like protein B9	protein_coding	-3.347807002	0.009682169	0.060566333	-4.367476083	0.000177226	0.002592707
0.0019654349699844073	NC_044372.1	42166201	42166999	+	48.3416	798	exon	-exon (LOC115710696, exon 1 of 1)	257	LOC115710696	LOC115710696	XM_030639047	uncharacterized LOC115710696	protein_coding	NA	NA	NA	NA	NA	NA
0.0019654349699844073-2	NC_044376.1	60986401	60987399	+	48.3416	998	Intergenic	Intergenic	32159	LOC115721829	LOC115721829	XM_030650909	receptor-like protein EIX2	protein_coding	1.99576168	3.98548E-05	0.000436292	2.277884507	1.5667E-07	4.36473E-06
3.6822882392138907e-06	NC_044372.1	32294801	32295999	+	48.3416	1198	Intergenic	Intergenic	-38736	LOC115709383	LOC115709383	XM_030637471	phenylalanine ammonia-lyase	protein_coding	-0.360331177	1	1	-0.775788082	1	1
2.7929806017526868e-05	NC_044373.1	43881601	43883399	+	48.292	1798	Intergenic	Intergenic	-294009	LOC115714342	LOC115714342	XM_030643016	crossover junction endonuclease EME1B,	protein_coding	-0.902046469	1	1	-0.176722662	1	1
7.755577617618952e-05	NC_044371.1	22212601	22214199	+	48.2569	1598	Intergenic	Intergenic	-31965	LOC115708437	LOC115708437	XR_004009937	small nucleolar RNA R71	snoRNA	NA	NA	NA	NA	NA	NA
0.0018922372649715705	NC_044377.1	63334201	63335199	+	48.243	998	Intergenic	Intergenic	4696	LOC115695355	LOC115695355	XM_030622425	uncharacterized LOC115695355	protein_coding	NA	NA	NA	NA	NA	NA
0.0006362216807953191	NC_044378.1	70791001	70792399	+	48.2235	1398	Intergenic	Intergenic	-21620	LOC115697284	LOC115697284	XM_030624224	UDP-glycosyltransferase 88A1	protein_coding	-0.228364295	1	1	-0.059935312	1	1
0.00021695538642353004	NC_044379.1	18492201	18493799	+	48.2106	1598	Intergenic	Intergenic	24991	LOC115699902	LOC115699902	XM_030627445	uncharacterized LOC115699902	protein_coding	NA	NA	NA	NA	NA	NA
0.0002090383903995403	NC_044373.1	85287601	85288999	+	48.1468	1398	intron	-intron (LOC115712826, intron 14 of 16)	-5553	LOC115712450	LOC115712450	XM_030640723	uncharacterized LOC115712450	protein_coding	0.082691441	1	1	0.145033506	1	1
0.0002090383903995403-2	NC_044375.1	71763201	71765199	+	48.1468	1998	Intergenic	Intergenic	11309	LOC115720328	LOC115720328	XM_030649481	pectinesterase inhibitor 6-like	protein_coding	0	1	NA	-0.410947537	1	NA
8.741750678087465e-06	NC_044372.1	86125801	86128799	+	48.1468	2998	Intergenic	Intergenic	-22329	LOC115711067	LOC115711067	XM_030639403	uncharacterized LOC115711067	protein_coding	NA	NA	NA	NA	NA	NA
0.0006127967784648415	NC_044373.1	65312601	65314399	+	48.1468	1798	Intergenic	Intergenic	-71951	LOC115715342	LOC115715342	XR_004011218	small nucleolar RNA R71	snoRNA	NA	NA	NA	NA	NA	NA
0.0006127967784648415-2	NC_044377.1	70813201	70814399	+	48.1468	1198	promoter-TSS	-promoter-TSS (LOC115696070)	-967	LOC115696070	LOC115696070	XR_004007668	small nucleolar RNA R71	snoRNA	NA	NA	NA	NA	NA	NA
0.001753767854424157-3	NC_044376.1	14426201	14427199	+	48.0531	998	Intergenic	Intergenic	14931	LOC115721691	LOC115721691	XM_030650755	chitinase-like protein 1,	protein_coding	-0.494340508	1	1	-0.801562289	1	1
0.001753767854424157	NC_044372.1	4879201	4879999	+	48.0531	798	Intergenic	Intergenic	-12567	LOC115710344	LOC115710344	XM_030638715	uncharacterized LOC115710344	protein_coding	NA	NA	NA	NA	NA	NA
0.001753767854424157-2	NC_044374.1	35846801	35847599	+	48.0531	798	Intergenic	Intergenic	-5182	LOC115717715	LOC115717715	XM_030646695	uncharacterized LOC115717715	protein_coding	NA	NA	NA	NA	NA	NA
0.001753767854424157-4	NC_044379.1	61712401	61713399	+	48.0531	998	Intergenic	Intergenic	-7689	LOC115699285	LOC115699285	XR_004008332	uncharacterized LOC115699285	lncRNA	NA	NA	NA	NA	NA	NA
3.3123732859350253e-07	NC_044379.1	21493001	21495199	+	48.0224	2198	Intergenic	Intergenic	-37816	LOC115701579	LOC115701579	XM_030629398	casparian strip membrane protein 1	protein_coding	-5.458520674	0.002601584	0.019015303	0.550844758	1	1
2.5581861393790935e-06	NC_044371.1	1958601	1961599	+	47.9617	2998	Intergenic	Intergenic	5057	LOC115707535	LOC115707535	XM_030635539	uncharacterized LOC115707535	protein_coding	NA	NA	NA	NA	NA	NA
0.00018695907446513132	NC_044371.1	68109401	68111199	+	47.9617	1798	Intergenic	Intergenic	-24514	LOC115704279	LOC115704279	XM_030631493	uncharacterized LOC115704279	protein_coding	0.510532929	1	1	1.694812535	0.394500563	1
4.4513911824759945e-09	NC_044378.1	51834201	51839999	+	47.9393	5798	Intergenic	Intergenic	29570	LOC115697021	LOC115697021	XR_004007858	uncharacterized LOC115697021	lncRNA	NA	NA	NA	NA	NA	NA
2.4665340625263595e-06	NC_044378.1	45296001	45299399	+	47.9258	3398	Intergenic	Intergenic	-152497	LOC115696594	LOC115696594	XM_030623487	protein UNUSUAL FLORAL ORGANS	protein_coding	-2.145257706	0.773507098	NA	0	1	NA
2.0065939833094492e-05	NC_044376.1	37957001	37959199	+	47.8726	2198	Intergenic	Intergenic	33111	LOC115722083	LOC115722083	XM_030651203	isocitrate dehydrogenase [NADP],	protein_coding	-0.583909583	1	1	-0.258267488	1	1
0.0016252638877602187	NC_044371.1	45633001	45634199	+	47.8726	1198	Intergenic	Intergenic	4343	LOC115704085	LOC115704085	XM_030631304	uncharacterized LOC115704085	protein_coding	NA	NA	NA	NA	NA	NA
0.0001735365974798363	NC_044372.1	41927401	41928999	+	47.8434	1598	Intergenic	Intergenic	16214	LOC115710693	LOC115710693	XM_030639043	uncharacterized LOC115710693	protein_coding	NA	NA	NA	NA	NA	NA
5.7706321391003565e-05	NC_044375.1	40623201	40624599	+	47.8351	1398	Intergenic	Intergenic	-42047	LOC115720090	LOC115720090	XM_030649252	uncharacterized LOC115720090	protein_coding	NA	NA	NA	NA	NA	NA
0.0015645329775950576	NC_044376.1	33244601	33245799	+	47.7857	1198	Intergenic	Intergenic	64702	LOC115724120	LOC115724120	XM_030653588	GPI mannosyltransferase 2,	protein_coding	-0.715415578	1	1	-0.44537072	1	1
0.0015645329775950576-2	NC_044376.1	49576601	49577799	+	47.7857	1198	Intergenic	Intergenic	-120812	LOC115723320	LOC115723320	XM_030652755	serine/threonine-protein kinase-like protein ACR4	protein_coding	0.796712313	1	1	-1.325448567	0.139571947	0.684087592
2.131392830807092e-06	NC_044377.1	22154801	22157199	+	47.7857	2398	Intergenic	Intergenic	-14798	LOC115724806	LOC115724806	XM_030654159	uncharacterized LOC115724806	protein_coding	1.549169232	0.892939793	NA	1.512629836	0.90002605	NA
0.0005078360354100099	NC_044378.1	11682601	11683399	+	47.7857	798	Intergenic	Intergenic	23825	LOC115698154	LOC115698154	XM_030625335	copper transporter 1-like	protein_coding	-3.078685475	0.420924783	NA	-0.410949364	1	NA
1.9811928360977997e-06	NC_044372.1	46031801	46033999	+	47.7177	2198	Intergenic	Intergenic	-11508	LOC115711194	LOC115711194	XM_030639521	probable beta-1,4-xylosyltransferase IRX10	protein_coding	-1.444690297	0.627350018	1	-3.505202005	0.005899229	0.052114377
0.0004890814150846296	NC_044372.1	65320801	65321999	+	47.7177	1198	Intergenic	Intergenic	7922	LOC115711348	LOC115711348	XM_030639684	probable receptor-like protein kinase At5g61350	protein_coding	-0.591414799	1	1	-0.972837255	1	1
0.0015060395001598816-2	NC_044371.1	63001201	63001999	+	47.7009	798	Intergenic	Intergenic	21261	LOC115704206	LOC115704206	XM_030631423	putative disease resistance RPP13-like protein 1	protein_coding	-2.749223927	0.372157751	1	-5.066236407	0.030759136	0.20587844
0.0015060395001598816	NC_044371.1	38043001	38044599	+	47.7009	1598	promoter-TSS	-promoter-TSS (LOC115704019)	-333	LOC115704019	LOC115704019	XM_030631242	protein FAR1-RELATED SEQUENCE 9-like	protein_coding	NA	NA	NA	NA	NA	NA
0.00015517056854926823-2	NC_044378.1	31574601	31576199	+	47.673	1598	Intergenic	Intergenic	-3100	LOC115696870	LOC115696870	XM_030623755	probable ribose-5-phosphate isomerase 4, chloroplastic	protein_coding	2.541036156	0.000671737	0.005736475	1.560247207	0.210624284	0.932480564
0.00015517056854926823	NC_044376.1	12281601	12283199	+	47.673	1598	Intergenic	Intergenic	32538	LOC115723076	LOC115723076	XM_030652485	F-box/LRR-repeat protein 4	protein_coding	0.090881109	1	1	-0.0055842	1	1
5.63261547294241e-06	NC_044372.1	44788001	44790999	+	47.673	2998	Intergenic	Intergenic	21415	LOC115711467	LOC115711467	XR_004010498	uncharacterized LOC115711467	lncRNA	NA	NA	NA	NA	NA	NA
0.0004710117566450059	NC_044379.1	39195201	39196599	+	47.6509	1398	Intergenic	Intergenic	5482	LOC115701183	LOC115701183	XM_030628905	uncharacterized LOC115701183	protein_coding	NA	NA	NA	NA	NA	NA
6.046231524794106e-07	NC_044378.1	22857601	22861599	+	47.6329	3998	Intergenic	Intergenic	9534	LOC115698411	LOC115698411	XR_004008159	small nucleolar RNA R71	snoRNA	NA	NA	NA	NA	NA	NA
1.6087155656935912e-05	NC_044375.1	53308401	53310199	+	47.618	1798	Intergenic	Intergenic	4196	LOC115720188	LOC115720188	XM_030649345	uncharacterized LOC115720188	protein_coding	NA	NA	NA	NA	NA	NA
0.00014948701038306836	NC_044374.1	37229201	37229999	+	47.618	798	promoter-TSS	-promoter-TSS (LOC115718304)	-1123	LOC115718304	LOC115718304	XR_004011884	small nucleolar RNA R71	snoRNA	NA	NA	NA	NA	NA	NA
0.001449704193870751	NC_044371.1	61358201	61359199	+	47.618	998	Intergenic	Intergenic	-9901	LOC115708260	LOC115708260	XM_030636483	40S ribosomal protein S27-2-like	protein_coding	-0.986471771	1	1	-0.034325328	1	1
4.7949863318002886e-05	NC_044371.1	50534001	50535999	+	47.5947	1998	Intergenic	Intergenic	-12998	LOC115704126	LOC115704126	XM_030631346	uncharacterized LOC115704126	protein_coding	NA	NA	NA	NA	NA	NA
0.00014400976451414902	NC_044376.1	41925801	41927199	+	47.5639	1398	Intergenic	Intergenic	5766	LOC115722492	LOC115722492	XM_030651711	2-hydroxyisoflavanone dehydratase	protein_coding	0.868320883	1	1	-3.151142885	5.37428E-08	1.60668E-06
0.0013954503027261004	NC_044375.1	63438001	63439399	+	47.5372	1398	Intergenic	Intergenic	-34688	LOC115720250	LOC115720250	XM_030649406	uncharacterized LOC115720250	protein_coding	NA	NA	NA	NA	NA	NA
1.4943383183252908e-05	NC_044377.1	17395801	17397599	+	47.5372	1798	Intergenic	Intergenic	63025	LOC115724706	LOC115724706	XR_004013260	uncharacterized LOC115724706	lncRNA	NA	NA	NA	NA	NA	NA
0.00043683062929123975	NC_044377.1	66733601	66735399	+	47.5212	1798	exon	-exon (LOC115695396, exon 1 of 1)	1049	LOC115695396	LOC115695396	XM_030622462	uncharacterized LOC115695396	protein_coding	NA	NA	NA	NA	NA	NA
0.0012928919718271153	NC_044379.1	4397801	4398799	+	47.381	998	Intergenic	Intergenic	-13454	LOC115699025	LOC115699025	XM_030626235	zinc finger CCCH domain-containing protein 48	protein_coding	-0.719978525	1	1	-0.608519568	1	1
4.3535358248536953e-07	NC_044372.1	75884001	75886599	+	47.3741	2598	Intergenic	Intergenic	4469	LOC115711773	LOC115711773	XR_004010649	small nucleolar RNA R71	snoRNA	NA	NA	NA	NA	NA	NA
0.0003901127256214383	NC_044372.1	54289201	54290799	+	47.3356	1598	Intergenic	Intergenic	17831	LOC115708952	LOC115708952	XR_004010111	uncharacterized LOC115708952	lncRNA	NA	NA	NA	NA	NA	NA
3.8379943640364646e-05	NC_044370.1	94354801	94356599	+	47.327	1798	Intergenic	Intergenic	14045	LOC115698158	LOC115698158	XM_030625339	inactive TPR repeat-containing thioredoxin TTL3	protein_coding	1.568143938	NA	NA	0.747772297	NA	NA
3.760037450871407e-06	NC_044374.1	27330601	27333999	+	47.2891	3398	Intergenic	Intergenic	7047	LOC115715840	LOC115715840	XR_004011454	uncharacterized LOC115715840,	lncRNA	-2.162788821	0.706840152	NA	-1.363844576	0.908374831	NA
3.698073494348491e-05	NC_044375.1	38747401	38749599	+	47.2844	2198	Intergenic	Intergenic	10556	LOC115719623	LOC115719623	XM_030648731	glucan endo-1,3-beta-glucosidase 12	protein_coding	-6.501288213	NA	NA	-3.555683035	NA	NA
0.00011508430557729719-2	NC_044379.1	14199601	14201399	+	47.2563	1798	Intergenic	Intergenic	-15691	LOC115699872	LOC115699872	XM_030627414	uncharacterized LOC115699872	protein_coding	NA	NA	NA	NA	NA	NA
0.00011508430557729719	NC_044373.1	81287401	81288799	+	47.2563	1398	Intergenic	Intergenic	-12007	LOC115712028	LOC115712028	XM_030640231	uncharacterized LOC115712028	protein_coding	-3.916445698	0.001720959	0.013301965	-0.748656559	1	1
3.563221451893102e-05	NC_044375.1	38439401	38441599	+	47.2423	2198	Intergenic	Intergenic	-103089	LOC115721222	LOC115721222	XM_030650479	uncharacterized LOC115721222	protein_coding	0.091652333	1	1	0.30087518	1	1
0.0011977986429025202	NC_044373.1	7598401	7599599	+	47.2319	1198	Intergenic	Intergenic	-2329	LOC115712725	LOC115712725	XM_030641067	uncharacterized LOC115712725,	protein_coding	2.673843158	3.52814E-12	1.04825E-10	1.736254131	0.001925025	0.02022118
3.680947400361554e-08	NC_044370.1	58820001	58822999	+	47.2263	2998	Intergenic	Intergenic	27704	LOC115712888	LOC115712888	XR_004010956	uncharacterized LOC115712888	lncRNA	NA	NA	NA	NA	NA	NA
0.0003617552120804844	NC_044371.1	73001001	73002399	+	47.2173	1398	Intergenic	Intergenic	-21310	LOC115705647	LOC115705647	XM_030633048	uncharacterized LOC115705647	protein_coding	-5.201801847	5.49105E-15	2.25544E-13	-3.606082054	1.45428E-06	3.36004E-05
3.49631433044217e-07	NC_044372.1	93134801	93138799	+	47.2121	3998	Intergenic	Intergenic	-38278	LOC115708706	LOC115708706	XM_030636699	uncharacterized LOC115708706	protein_coding	0.063520472	1	1	0.202980571	1	1
0.00011085894535041847	NC_044370.1	101595801	101597799	+	47.2077	1998	promoter-TSS	-promoter-TSS (LOC115703403)	-1636	LOC115703403	LOC115703403	XR_004009169	small nucleolar RNA R71	snoRNA	NA	NA	NA	NA	NA	NA
3.640790722335898e-09	NC_044370.1	76871201	76874199	+	47.198	2998	Intergenic	Intergenic	-27837	LOC115724922	LOC115724922	XM_030654299	uncharacterized LOC115724922	protein_coding	NA	NA	NA	NA	NA	NA
0.001152884613181481	NC_044372.1	57748601	57749599	+	47.1598	998	Intergenic	Intergenic	46573	LOC115711493	LOC115711493	XM_030639834	squamosa promoter-binding-like protein 6,	protein_coding	-1.524613716	0.083564449	0.380924685	-3.467496276	3.63929E-17	3.4979E-15
0.001152884613181481-2	NC_044373.1	85727201	85728399	+	47.1598	1198	Intergenic	Intergenic	9056	LOC115712070	LOC115712070	XM_030640291	NAC domain-containing protein 37,	protein_coding	-0.938059655	1	1	-1.276327062	0.642769013	1
0.00010678770556351062	NC_044373.1	60868001	60869599	+	47.1598	1598	Intergenic	Intergenic	-76083	LOC115714319	LOC115714319	XM_030642973	lupeol synthase	protein_coding	-0.102620746	1	1	0.676433813	1	1
3.1280493495511213e-06	NC_044372.1	43146801	43150199	+	47.1283	3398	Intergenic	Intergenic	182997	LOC115710705	LOC115710705	XM_030639056	uncharacterized LOC115710705	protein_coding	NA	NA	NA	NA	NA	NA
0.00010286503972948236	NC_044371.1	75344001	75345199	+	47.1126	1198	Intergenic	Intergenic	17524	LOC115705752	LOC115705752	XM_030633178	sucrose-phosphatase 1,	protein_coding	-0.0970549	1	1	0.210547688	1	1
0.0003354443871251819	NC_044375.1	48462201	48463599	+	47.1033	1398	TTS	-TTS (LOC115720970)	487	LOC115720970	LOC115720970	XM_030650193	peptidyl-prolyl cis-trans isomerase FKBP16-3, chloroplastic-like	protein_coding	0	1	NA	-0.410947537	1	NA
0.0011096411788723826	NC_044374.1	19351201	19352399	+	47.0893	1198	Intergenic	Intergenic	111255	LOC115715760	LOC115715760	XM_030644431	metalloendoproteinase 4-MMP	protein_coding	-3.356736761	0.056516985	0.275114206	-3.601211935	0.034742491	0.227626073
9.592681666875455e-06	NC_044378.1	50671401	50673799	+	47.0893	2398	Intergenic	Intergenic	-2792	LOC115698407	LOC115698407	XR_004008155	small nucleolar RNA R71	snoRNA	NA	NA	NA	NA	NA	NA
9.24432900926838e-06	NC_044377.1	31223601	31225799	+	47.0546	2198	Intergenic	Intergenic	-3400	LOC115724890	LOC115724890	XM_030654256	formin-like protein 5	protein_coding	0.002570217	1	1	0.049163668	1	1
2.652296740053555e-08	NC_044376.1	43332801	43336399	+	47.0308	3598	Intergenic	Intergenic	58493	LOC115722561	LOC115722561	XM_030651802	uncharacterized LOC115722561	protein_coding	0.174283054	1	1	-0.036571188	1	1
9.54442084626826e-05	NC_044378.1	48717001	48718599	+	47.0203	1598	Intergenic	Intergenic	98479	LOC115696618	LOC115696618	XM_030623512	uncharacterized LOC115696618	protein_coding	NA	NA	NA	NA	NA	NA
8.908564556195473e-06	NC_044370.1	70492201	70494199	+	47.0203	1998	exon	-exon (LOC115723794, exon 2 of 3)	654	LOC115723794	LOC115723794	XM_030653266	uncharacterized LOC115723794	protein_coding	0	1	NA	-0.410947537	1	NA
0.0010680076406352891-2	NC_044377.1	41756201	41757199	+	47.0203	998	Intergenic	Intergenic	25563	LOC115696154	LOC115696154	XR_004007745	small nucleolar RNA R71	snoRNA	NA	NA	NA	NA	NA	NA
0.0010680076406352891	NC_044372.1	46740001	46741199	+	47.0203	1198	Intergenic	Intergenic	-7638	LOC115711689	LOC115711689	XM_030640071	purple acid phosphatase 22	protein_coding	-0.53031148	1	1	-2.800036866	0.001611624	0.017453659
0.0003110349393105885	NC_044374.1	31041801	31043399	+	46.9932	1598	Intergenic	Intergenic	-112000	LOC115717703	LOC115717703	XM_030646683	hepatitis A virus cellular receptor 1-like	protein_coding	NA	NA	NA	NA	NA	NA
0.0009893377388699646	NC_044377.1	74248401	74249999	+	46.8868	1598	Intergenic	Intergenic	5772	LOC115724892	LOC115724892	XM_030654258	B-box zinc finger protein 20	protein_coding	4.011616694	0.235271014	NA	3.013277419	0.427524644	NA
0.0002883914970777589	NC_044378.1	26709601	26711799	+	46.8868	2198	Intergenic	Intergenic	9996	LOC115698044	LOC115698044	XM_030625230	receptor-like protein 4	protein_coding	-0.064359855	1	1	0.083774656	1	1
8.216216945918952e-05	NC_044371.1	54432001	54433799	+	46.8436	1798	Intergenic	Intergenic	-478573	LOC115704145	LOC115704145	XM_030631362	uncharacterized LOC115704145	protein_coding	NA	NA	NA	NA	NA	NA
0.0002776922890447851-2	NC_044375.1	51393401	51394599	+	46.835	1198	Intergenic	Intergenic	166062	LOC115719674	LOC115719674	XM_030648804	DNA ligase 1	protein_coding	0.378899527	1	1	0.568079845	1	1
0.0002776922890447851	NC_044375.1	26632801	26634599	+	46.835	1798	Intergenic	Intergenic	5773	LOC115719172	LOC115719172	XM_030648109	pentatricopeptide repeat-containing protein At1g08610	protein_coding	-0.212557456	1	1	0.0770445	1	1
2.085470555116909e-06	NC_044378.1	33726201	33729599	+	46.8009	3398	Intergenic	Intergenic	78576	LOC115697097	LOC115697097	XR_004007879	uncharacterized LOC115697097,	lncRNA	-6.418633062	6.2762E-05	0.000660358	-4.23771748	0.018456991	0.134623285
6.8747304911373966e-06	NC_044370.1	29860601	29863599	+	46.7903	2998	Intergenic	Intergenic	-26948	LOC115709473	LOC115709473	XM_030637611	callose synthase 10,	protein_coding	1.355462635	0.596843811	1	0.690373517	1	1
0.0002673880080852817	NC_044371.1	47536601	47537799	+	46.784	1198	Intergenic	Intergenic	-73321	LOC115706904	LOC115706904	XM_030634674	L-ascorbate peroxidase 2, cytosolic-like	protein_coding	NA	NA	NA	NA	NA	NA
0.000916429646806698-2	NC_044375.1	85253201	85254399	+	46.7589	1198	Intergenic	Intergenic	6313	LOC115721110	LOC115721110	XR_004012380	uncharacterized LOC115721110	lncRNA	NA	NA	NA	NA	NA	NA
0.000916429646806698	NC_044373.1	26721201	26722199	+	46.7589	998	Intergenic	Intergenic	41430	LOC115713292	LOC115713292	XM_030641771	uncharacterized LOC115713292	protein_coding	NA	NA	NA	NA	NA	NA
0.0008820054848701484	NC_044370.1	35533001	35534199	+	46.6969	1198	Intergenic	Intergenic	145377	LOC115710400	LOC115710400	XM_030638766	G-type lectin S-receptor-like serine/threonine-protein kinase LECRK1	protein_coding	-1.143820885	0.971670632	NA	0	1	NA
1.5619424149292368e-07	NC_044377.1	73243001	73247999	+	46.6802	4998	promoter-TSS	-promoter-TSS (LOC115695473)	-297	LOC115695473	LOC115695473	XM_030622536	uncharacterized LOC115695473	protein_coding	NA	NA	NA	NA	NA	NA
2.0391754840135857e-05	NC_044378.1	49446201	49448199	+	46.6707	1998	Intergenic	Intergenic	-2668	LOC115696627	LOC115696627	XM_030623521	uncharacterized mitochondrial protein AtMg00240-like	protein_coding	NA	NA	NA	NA	NA	NA
0.0008488684592842163-2	NC_044372.1	34591201	34592999	+	46.6361	1798	Intergenic	Intergenic	12439	LOC115709432	LOC115709432	XM_030637542	AP-3 complex subunit delta	protein_coding	-0.11307277	1	1	-0.01906555	1	1
0.0008488684592842163	NC_044370.1	64497801	64498799	+	46.6361	998	Intergenic	Intergenic	-26216	LOC115703383	LOC115703383	XR_004009151	small nucleolar RNA R71	snoRNA	NA	NA	NA	NA	NA	NA
6.811739171473187e-05	NW_022060487.1	763001	764799	+	46.6361	1798	NA	NA	NA	NA			#N/A		NA	NA	NA	NA	NA	NA
1.348747588273994e-07	NC_044377.1	13273401	13276199	+	46.5927	2798	Intergenic	Intergenic	34786	LOC115724548	LOC115724548	XM_030653851	phospholipase D alpha 1	protein_coding	4.09878729	0.153367684	0.625809167	-0.706563549	1	1
0.00022983975606093095	NC_044370.1	10952201	10953999	+	46.5884	1798	Intergenic	Intergenic	-2538	LOC115716751	LOC115716751	XM_030645683	protein LONGIFOLIA 1	protein_coding	1.631839073	0.112032952	0.485375127	-1.475299672	0.215423513	0.948919844
5.303748110054996e-06	NC_044371.1	65234801	65236799	+	46.5766	1998	Intergenic	Intergenic	47439	LOC115704243	LOC115704243	XM_030631457	uncharacterized LOC115704243	protein_coding	NA	NA	NA	NA	NA	NA
0.0008169711572852228	NC_044372.1	16715201	16716999	+	46.5766	1798	Intergenic	Intergenic	-90329	LOC115711200	LOC115711200	XR_004010429	uncharacterized LOC115711200	lncRNA	NA	NA	NA	NA	NA	NA
0.0008169711572852228-2	NC_044375.1	49036801	49037799	+	46.5766	998	Intergenic	Intergenic	29908	LOC115720279	LOC115720279	XR_004012265	uncharacterized LOC115720279,	lncRNA	NA	NA	NA	NA	NA	NA
1.8234913115522642e-05	NC_044374.1	42174401	42176399	+	46.5682	1998	Intergenic	Intergenic	-14357	LOC115715994	LOC115715994	XR_004011503	uncharacterized LOC115715994	lncRNA	0	1	NA	-0.410947537	1	NA
6.319382146481523e-05	NC_044370.1	76734201	76736199	+	46.5571	1998	promoter-TSS	-promoter-TSS (LOC115703331)	-762	LOC115703331	LOC115703331	XR_004009105	small nucleolar RNA R71	snoRNA	NA	NA	NA	NA	NA	NA
0.00022130409988082583-2	NC_044376.1	33554201	33555599	+	46.5415	1398	Intergenic	Intergenic	-8032	LOC115724385	LOC115724385	XR_004013178	small nucleolar RNA R71	snoRNA	NA	NA	NA	NA	NA	NA
0.00022130409988082583	NC_044375.1	63475801	63477999	+	46.5415	2198	Intergenic	Intergenic	3512	LOC115720250	LOC115720250	XM_030649406	uncharacterized LOC115720250	protein_coding	NA	NA	NA	NA	NA	NA
0.0007862678430305779-2	NC_044374.1	82171001	82171999	+	46.5183	998	Intergenic	Intergenic	12295	LOC115718066	LOC115718066	XM_030647029	uncharacterized LOC115718066	protein_coding	NA	NA	NA	NA	NA	NA
0.0007862678430305779	NC_044374.1	67576801	67577999	+	46.5183	1198	Intergenic	Intergenic	-17083	LOC115718234	LOC115718234	XR_004011818	small nucleolar RNA R71	snoRNA	NA	NA	NA	NA	NA	NA
0.0007862678430305779-3	NW_022060368.1	72601	74199	+	46.5183	1598	Intergenic	Intergenic	-48217	LOC115702020	LOC115702020	XR_004008778	#N/A	lncRNA	NA	NA	NA	NA	NA	NA
1.6924878861587353e-05	NC_044377.1	57024801	57026599	+	46.5019	1798	promoter-TSS	-promoter-TSS (LOC115695292)	-32	LOC115695292	LOC115695292	XM_030622367	uncharacterized LOC115695292	protein_coding	NA	NA	NA	NA	NA	NA
0.0002130843067430208	NC_044372.1	46563801	46564599	+	46.4953	798	Intergenic	Intergenic	-26487	LOC115709607	LOC115709607	XM_030637743	transcriptional activator DEMETER	protein_coding	-1.207762553	0.322260422	1	-1.758919683	0.000292126	0.004045781
5.862492072186337e-05	NC_044374.1	5280801	5282599	+	46.4801	1798	TTS	-TTS (LOC115718317)	459	LOC115718317	LOC115718317	XR_004011896	small nucleolar RNA R71	snoRNA	NA	NA	NA	NA	NA	NA
1.339088659711416e-06	NC_044374.1	44775001	44777799	+	46.4801	2798	Intergenic	Intergenic	6532	LOC115718190	LOC115718190	XR_004011775	small nucleolar RNA R71	snoRNA	NA	NA	NA	NA	NA	NA
5.646547289921734e-05	NC_044373.1	46003401	46005799	+	46.4423	2398	Intergenic	Intergenic	-4085	LOC115712342	LOC115712342	XM_030640616	uncharacterized LOC115712342	protein_coding	-1.931858425	0.137734743	0.573213889	0.402860911	1	1
3.2782051640527445e-07	NC_044373.1	65493801	65497799	+	46.383	3998	Intergenic	Intergenic	-36180	LOC115715344	LOC115715344	XR_004011220	small nucleolar RNA R71	snoRNA	NA	NA	NA	NA	NA	NA
0.00019020636052718352-2	NC_044378.1	46321601	46323599	+	46.3611	1998	Intergenic	Intergenic	-21136	LOC115696606	LOC115696606	XM_030623499	uncharacterized LOC115696606	protein_coding	NA	NA	NA	NA	NA	NA
0.00019020636052718352	NC_044377.1	19112801	19114999	+	46.3611	2198	Intergenic	Intergenic	3126	LOC115695028	LOC115695028	XM_030622125	arginine/serine-rich coiled-coil protein 2-like	protein_coding	NA	NA	NA	NA	NA	NA
0.0007008885206537024-3	NC_044378.1	49309601	49310999	+	46.3502	1398	Intergenic	Intergenic	-12818	LOC115696625	LOC115696625	XM_030623519	uncharacterized LOC115696625	protein_coding	NA	NA	NA	NA	NA	NA
0.0007008885206537024-2	NC_044371.1	91844401	91845799	+	46.3502	1398	Intergenic	Intergenic	2194	LOC115707380	LOC115707380	XM_030635331	uncharacterized LOC115707380	protein_coding	-0.059319838	1	1	-0.142505426	1	1
0.0007008885206537024	NC_044370.1	16307201	16308999	+	46.3502	1798	exon	-exon (LOC115704583, exon 2 of 3)	930	LOC115704583	LOC115704583	XM_030631789	thaumatin-like protein 1	protein_coding	-3.822559786	NA	NA	-1.259932921	NA	NA
5.045144874174243e-05	NC_044373.1	47349201	47351399	+	46.3321	2198	Intergenic	Intergenic	-73475	LOC115712540	LOC115712540	XM_030640832	mulatexin	protein_coding	-4.195879781	1.55913E-10	3.80727E-09	-10.84991648	3.15406E-87	6.06305E-83
1.3531470028580405e-05	NC_044379.1	36573401	36575799	+	46.3116	2398	Intergenic	Intergenic	-5449	LOC115701780	LOC115701780	XR_004008760	small nucleolar RNA R71	snoRNA	NA	NA	NA	NA	NA	NA
0.0006745355114550748	NC_044379.1	45062401	45063599	+	46.2963	1198	Intergenic	Intergenic	2465	LOC115701591	LOC115701591	XR_004008586	small nucleolar RNA R71	snoRNA	NA	NA	NA	NA	NA	NA
1.1503021204529008e-11	NC_044372.1	75364401	75371999	+	46.2963	7598	Intergenic	Intergenic	-37629	LOC115709546	LOC115709546	XM_030637670	phenylalanine N-monooxygenase-like,	protein_coding	1.549194214	0.776222887	1	-5.101991611	0.00789253	0.066223528
4.8592249058720735e-05	NC_044372.1	71400201	71401799	+	46.2963	1598	Intergenic	Intergenic	-22248	LOC115711392	LOC115711392	XR_004010474	uncharacterized LOC115711392,	lncRNA	NA	NA	NA	NA	NA	NA
0.00017633220719765727	NC_044374.1	17442601	17444399	+	46.275	1798	Intergenic	Intergenic	-20895	LOC115717099	LOC115717099	XM_030646043	RGS1-HXK1-interacting protein 1	protein_coding	-0.316268155	1	1	-0.016236147	1	1
0.00017633220719765727-2	NC_044379.1	44191401	44192999	+	46.275	1598	Intergenic	Intergenic	11678	LOC115700893	LOC115700893	XM_030628560	uncharacterized LOC115700893	protein_coding	1.220532581	0.602439289	1	0.752610722	1	1
0.0006491711537397068	NC_044374.1	73881801	73883599	+	46.2434	1798	Intergenic	Intergenic	-7857	LOC115716302	LOC115716302	XM_030645063	14 kDa proline-rich protein DC2.15	protein_coding	4.616350565	0.206186377	0.787506602	4.579809897	0.210811596	0.933094938
0.00016977845267243945-2	NC_044373.1	67776801	67778199	+	46.233	1398	Intergenic	Intergenic	18739	LOC115715244	LOC115715244	XM_030644084	homeobox-leucine zipper protein ATHB-6	protein_coding	-0.192934567	1	1	-0.45114219	1	1
0.00016977845267243945	NC_044373.1	10111201	10113399	+	46.233	2198	Intergenic	Intergenic	-28875	LOC115715409	LOC115715409	XR_004011282	small nucleolar RNA R71	snoRNA	NA	NA	NA	NA	NA	NA
3.0396567835991487e-06	NC_044373.1	56450201	56451999	+	46.166	1798	Intergenic	Intergenic	-9067	LOC115715421	LOC115715421	XR_004011292	small nucleolar RNA R71	snoRNA	NA	NA	NA	NA	NA	NA
0.00015739111771189207	NC_044370.1	75840801	75842799	+	46.1507	1998	Intergenic	Intergenic	75876	LOC115714593	LOC115714593	XM_030643341	kinesin-like protein KIN-4C	protein_coding	-3.840502467	0.086653574	0.393048999	-5.111630159	0.011495177	0.090340062
0.0006012627412742807	NC_044377.1	54372001	54373199	+	46.1406	1198	Intergenic	Intergenic	16491	LOC115725265	LOC115725265	XM_030654721	glycosyltransferase BC10,	protein_coding	0.248801496	1	1	0.507842453	1	1
4.027270291341631e-05	NC_044372.1	76895001	76897399	+	46.1239	2398	Intergenic	Intergenic	65197	LOC115708818	LOC115708818	XM_030636835	protein cornichon homolog 1-like	protein_coding	0.079909997	1	1	0.585983017	1	1
0.0023477782352526147	NC_044371.1	15298801	15299799	+	46.1239	998	Intergenic	Intergenic	-12812	LOC115704008	LOC115704008	XM_030631231	high mobility group B protein 7	protein_coding	-1.8127753	0.034856314	0.181985038	-2.060130851	0.005823935	0.051544122
0.0023477782352526147-2	NC_044379.1	6030601	6031199	+	46.1239	598	Intergenic	Intergenic	17641	LOC115699239	LOC115699239	XM_030626534	uncharacterized LOC115699239	protein_coding	NA	NA	NA	NA	NA	NA
0.00015153995238463287-2	NC_044379.1	3663201	3665199	+	46.1106	1998	Intergenic	Intergenic	-37113	LOC115699501	LOC115699501	XM_030626950	protein TPR3,	protein_coding	-0.366502746	1	1	-0.587360955	1	1
0.00015153995238463287	NC_044375.1	89991601	89992799	+	46.1106	1198	Intergenic	Intergenic	-8062	LOC115719294	LOC115719294	XM_030648275	sister chromatid cohesion protein SCC4	protein_coding	-0.012441331	1	1	0.074454344	1	1
0.0005786491418747122-3	NC_044374.1	77025401	77026599	+	46.0907	1198	Intergenic	Intergenic	524042	LOC115718006	LOC115718006	XM_030646974	uncharacterized LOC115718006	protein_coding	0	1	NA	-0.410947537	1	NA
0.0005786491418747122-4	NC_044377.1	5036201	5037199	+	46.0907	998	intron	-intron (LOC115694895, intron 3 of 4)	3833	LOC115694895	LOC115694895	XM_030621999	uncharacterized LOC115694895	protein_coding	NA	NA	NA	NA	NA	NA
0.0005786491418747122	NC_044370.1	50622001	50623599	+	46.0907	1598	Intergenic	Intergenic	29926	LOC115702478	LOC115702478	XM_030629921	uncharacterized LOC115702478	protein_coding	0	1	1	-5.834025369	0.00782842	0.065771732
2.7191398374599214e-06	NC_044379.1	5247001	5250199	+	46.0907	3198	TTS	-TTS (LOC115699170)	1490	LOC115701778	LOC115701778	XR_004008758	small nucleolar RNA R71	snoRNA	NA	NA	NA	NA	NA	NA
0.0005786491418747122-2	NC_044370.1	74267601	74269399	+	46.0907	1798	Intergenic	Intergenic	-187952	LOC115724671	LOC115724671	XM_030654011	uncharacterized LOC115724671	protein_coding	NA	NA	NA	NA	NA	NA
0.00014048103286104686-2	NC_044375.1	69685001	69687199	+	46.0319	2198	Intergenic	Intergenic	40820	LOC115718707	LOC115718707	XR_004012009	uncharacterized LOC115718707	lncRNA	NA	NA	NA	NA	NA	NA
0.00014048103286104686	NC_044374.1	20054201	20056599	+	46.0319	2398	Intergenic	Intergenic	-52835	LOC115716838	LOC115716838	XR_004011611	uncharacterized LOC115716838	lncRNA	NA	NA	NA	NA	NA	NA
0.00014048103286104686-3	NC_044377.1	27306601	27308799	+	46.0319	2198	Intergenic	Intergenic	21191	LOC115696021	LOC115696021	XR_004007622	small nucleolar RNA R71	snoRNA	NA	NA	NA	NA	NA	NA
0.0005359386757849793	NC_044371.1	55135801	55137399	+	45.9935	1598	Intergenic	Intergenic	213735	LOC115707541	LOC115707541	XM_030635546	tRNA:m(4)X modification enzyme TRM13,	protein_coding	-0.007503496	1	1	0.377874846	1	1
0.0021715233087692912-2	NC_044378.1	31977601	31978599	+	45.9935	998	Intergenic	Intergenic	9108	LOC115698345	LOC115698345	XR_004008098	small nucleolar RNA R71	snoRNA	NA	NA	NA	NA	NA	NA
0.0021715233087692912	NC_044375.1	28170601	28171799	+	45.9935	1198	Intergenic	Intergenic	52114	LOC115718736	LOC115718736	XR_004012016	uncharacterized LOC115718736,	lncRNA	NA	NA	NA	NA	NA	NA
2.258145380173578e-06	NC_044378.1	31365201	31366799	+	45.9698	1598	promoter-TSS	-promoter-TSS (LOC115698092)	-1709	LOC115698092	LOC115698092	XR_004008038	uncharacterized LOC115698092	lncRNA	NA	NA	NA	NA	NA	NA
0.0005157795906580415-2	NC_044375.1	63969801	63970999	+	45.9462	1198	Intergenic	Intergenic	-17766	LOC115720252	LOC115720252	XM_030649408	uncharacterized LOC115720252	protein_coding	NA	NA	NA	NA	NA	NA
0.0005157795906580415	NC_044374.1	25761201	25762999	+	45.9462	1798	Intergenic	Intergenic	18159	LOC115717675	LOC115717675	XM_030646657	#N/A	protein_coding	NA	NA	NA	NA	NA	NA
0.002088422470581532	NC_044374.1	4885801	4886799	+	45.9307	998	Intergenic	Intergenic	-6947	LOC115716684	LOC115716684	XM_030645536	RNA polymerase sigma factor sigE, chloroplastic/mitochondrial	protein_coding	2.758536412	1.01534E-17	5.4519E-16	1.594064799	0.003656478	0.034744678
0.0001253852893036384	NC_044373.1	55292201	55293599	+	45.9183	1398	Intergenic	Intergenic	-44932	LOC115714572	LOC115714572	XR_004011079	uncharacterized LOC115714572	lncRNA	-2.082512083	0.193519856	0.749945517	-0.800741062	1	1
9.565625977771673e-09	NC_044370.1	57147801	57150399	+	45.9152	2598	Intergenic	Intergenic	-2053	LOC115703463	LOC115703463	XR_004009225	small nucleolar RNA R71	snoRNA	NA	NA	NA	NA	NA	NA
2.9816551978174004e-05	NC_044379.1	24419001	24421399	+	45.8693	2398	Intergenic	Intergenic	55265	LOC115700639	LOC115700639	XM_030628251	transmembrane emp24 domain-containing protein p24delta9	protein_coding	-0.670384183	1	1	-0.724959227	1	1
0.0004777066170077438	NC_044378.1	48405201	48406599	+	45.8542	1398	Intergenic	Intergenic	-19697	LOC115696615	LOC115696615	XM_030623510	uncharacterized LOC115696615	protein_coding	NA	NA	NA	NA	NA	NA
0.00011623284597018368	NC_044378.1	6103801	6105799	+	45.8452	1998	Intergenic	Intergenic	-47072	LOC115697106	LOC115697106	XR_004007882	uncharacterized LOC115697106	lncRNA	-5.035953595	0.037721428	0.194349777	-3.640327648	0.181353367	0.836409736
1.7408267989552115e-06	NC_044377.1	43731401	43734399	+	45.8094	2998	Intergenic	Intergenic	-371132	LOC115695668	LOC115695668	XM_030622727	uncharacterized protein At1g66480	protein_coding	-3.167632037	5.83816E-07	8.59824E-06	0.071708717	1	1
0.0019316466466868065	NC_044371.1	24412601	24413399	+	45.8094	798	Intergenic	Intergenic	85194	LOC115708301	LOC115708301	XM_030636528	peroxisomal fatty acid beta-oxidation multifunctional protein AIM1-like	protein_coding	1.549193634	0.772308352	1	-5.873693987	0.001120902	0.012818021
0.00045973710416498604	NC_044374.1	20829001	20830199	+	45.8094	1198	Intergenic	Intergenic	19508	LOC115718335	LOC115718335	XR_004011914	small nucleolar RNA R71	snoRNA	NA	NA	NA	NA	NA	NA
2.7657305351339265e-05	NC_044370.1	86108001	86109199	+	45.8094	1198	Intergenic	Intergenic	15754	LOC115725658	LOC115725658	XM_030655245	uncharacterized LOC115725658	protein_coding	NA	NA	NA	NA	NA	NA
0.0004424435235978487	NC_044374.1	72550801	72552199	+	45.7653	1398	Intergenic	Intergenic	-176703	LOC115717969	LOC115717969	XM_030646937	uncharacterized LOC115717969	protein_coding	NA	NA	NA	NA	NA	NA
0.0018577343836132334-3	NC_044375.1	89987801	89988999	+	45.7508	1198	Intergenic	Intergenic	-10949	LOC115720479	LOC115720479	XM_030649628	cytochrome P450 714C2	protein_coding	1.432123135	0.560880286	1	-1.178867788	0.799076679	1
2.5654257886236483e-05	NC_044374.1	72693801	72695999	+	45.7508	2198	Intergenic	Intergenic	-33303	LOC115717969	LOC115717969	XM_030646937	uncharacterized LOC115717969	protein_coding	NA	NA	NA	NA	NA	NA
0.0018577343836132334	NC_044372.1	44357601	44358999	+	45.7508	1398	Intergenic	Intergenic	-12360	LOC115709119	LOC115709119	XM_030637155	microtubule-associated protein RP/EB family member 1B,	protein_coding	-0.087913772	1	1	-0.050223876	1	1
0.0018577343836132334-2	NC_044375.1	45037601	45038599	+	45.7508	998	Intergenic	Intergenic	-67526	LOC115721173	LOC115721173	XM_030650426	NADPH-dependent aldehyde reductase 1, chloroplastic-like	protein_coding	0	1	1	-7.206904317	0.000258441	0.003625484
0.00010374050184011214	NC_044372.1	49628201	49630199	+	45.7393	1998	TTS	-TTS (LOC115711864)	140	LOC115711864	LOC115711864	XR_004010730	small nucleolar RNA R71	snoRNA	NA	NA	NA	NA	NA	NA
6.177560986447268e-06	NC_044377.1	75360001	75363399	+	45.7344	3398	Intergenic	Intergenic	-4862	LOC115695497	LOC115695497	XM_030622560	uncharacterized LOC115695497	protein_coding	NA	NA	NA	NA	NA	NA
2.4707755744686652e-05	NC_044370.1	58189401	58191799	+	45.7221	2398	Intergenic	Intergenic	15779	LOC115724981	LOC115724981	XM_030654692	uncharacterized LOC115724981	protein_coding	NA	NA	NA	NA	NA	NA
3.8104081679697106e-10-2	NC_044371.1	14203001	14206799	+	45.7221	3798	Intergenic	Intergenic	-36574	LOC115705025	LOC115705025	XM_030632259	UDP-glycosyltransferase 76F1	protein_coding	-1.387995583	0.839197345	1	-6.141377577	0.001881026	0.019867558
3.8104081679697106e-10	NC_044371.1	14207801	14210399	+	45.7221	2598	Intergenic	Intergenic	-40774	LOC115705025	LOC115705025	XM_030632259	UDP-glycosyltransferase 76F1	protein_coding	-1.387995583	0.839197345	1	-6.141377577	0.001881026	0.019867558
0.00042580055814860795	NC_044375.1	85108201	85109999	+	45.7221	1798	Intergenic	Intergenic	21596	LOC115720923	LOC115720923	XM_030650132	40S ribosomal protein S30	protein_coding	-0.072660131	1	1	0.655747424	1	1
9.0143527968433e-08	NC_044379.1	39066201	39069399	+	45.705	3198	TTS	-TTS (LOC115700088)	303	LOC115700089	LOC115700089	XM_030627648	uncharacterized LOC115700089	protein_coding	NA	NA	NA	NA	NA	NA
9.988203711405249e-05	NC_044374.1	83554201	83555999	+	45.705	1798	exon	-exon (LOC115718100, exon 2 of 3)	821	LOC115718100	LOC115718100	XM_030647061	uncharacterized LOC115718100	protein_coding	NA	NA	NA	NA	NA	NA
2.3796142849664383e-05	NC_044370.1	40514601	40516799	+	45.6936	2198	Intergenic	Intergenic	-3459	LOC115720341	LOC115720341	XM_030649494	uncharacterized LOC115720341	protein_coding	NA	NA	NA	NA	NA	NA
0.0017866549577481533-2	NC_044375.1	16922401	16923599	+	45.6936	1198	Intergenic	Intergenic	-36908	LOC115721273	LOC115721273	XM_030650539	uncharacterized LOC115721273	protein_coding	-2.568308513	0.130193205	0.547398069	-3.559407667	0.012821739	0.099064426
0.0017866549577481533	NC_044371.1	54663601	54664599	+	45.6936	998	Intergenic	Intergenic	-247373	LOC115704145	LOC115704145	XM_030631362	uncharacterized LOC115704145	protein_coding	NA	NA	NA	NA	NA	NA
0.0004097838257224614	NC_044376.1	1171601	1173199	+	45.6795	1598	Intergenic	Intergenic	-9129	LOC115722366	LOC115722366	XM_030651561	beta-galactosidase 9	protein_coding	-0.910498261	1	1	-1.112140501	0.655374382	1
0.0017183003985421135	NC_044373.1	2716401	2717399	+	45.6377	998	Intergenic	Intergenic	-3271	LOC115715384	LOC115715384	XR_004011258	small nucleolar RNA R71	snoRNA	NA	NA	NA	NA	NA	NA
0.0017183003985421135-2	NC_044374.1	68580001	68581399	+	45.6377	1398	Intergenic	Intergenic	-56645	LOC115716443	LOC115716443	XM_030645238	golgin subfamily A member 4	protein_coding	-1.549585372	0.011391283	0.069582028	-2.359042979	2.72656E-10	1.1494E-08
1.2002157984965054e-06	NC_044374.1	56990801	56993999	+	45.5966	3198	Intergenic	Intergenic	15382	LOC115716353	LOC115716353	XM_030645131	#N/A	protein_coding	4.520526283	7.13991E-08	1.22327E-06	2.682177321	0.008411021	0.070005568
0.001652566747485559	NC_044374.1	60171401	60172599	+	45.5831	1198	Intergenic	Intergenic	-284155	LOC115717877	LOC115717877	XM_030646848	uncharacterized LOC115717877	protein_coding	NA	NA	NA	NA	NA	NA
0.001652566747485559-2	NC_044375.1	4016001	4017599	+	45.5831	1598	intron	-intron (LOC115720605, intron 6 of 9)	8749	LOC115720605	LOC115720605	XM_030649759	MADS-box protein JOINTLESS,	protein_coding	0.797180792	1	1	4.464109029	0.082253123	0.453702091
8.583044618222937e-05	NC_044374.1	42708201	42710199	+	45.5723	1998	Intergenic	Intergenic	7841	LOC115717225	LOC115717225	XM_030646197	#N/A	protein_coding	-0.022299284	1	1	0.018421073	1	1
4.755749230086565e-06	NC_044374.1	47612601	47615599	+	45.5677	2998	Intergenic	Intergenic	105158	LOC115717803	LOC115717803	XM_030646776	nodulation receptor kinase-like	protein_coding	NA	NA	NA	NA	NA	NA
0.0003652605405642324-2	NC_044377.1	69350001	69351199	+	45.5562	1198	Intergenic	Intergenic	-6590	LOC115695420	LOC115695420	XM_030622485	uncharacterized LOC115695420	protein_coding	NA	NA	NA	NA	NA	NA
0.0003652605405642324	NC_044377.1	19908401	19910199	+	45.5562	1798	Intergenic	Intergenic	-14810	LOC115725512	LOC115725512	XM_030655062	uncharacterized LOC115725512	protein_coding	1.760205476	0.000226699	0.002150951	1.005010405	0.98040305	1
7.660482486869009e-05	NC_044376.1	44517601	44519799	+	45.4773	2198	Intergenic	Intergenic	-74502	LOC115723852	LOC115723852	XM_030653317	uncharacterized LOC115723852	protein_coding	NA	NA	NA	NA	NA	NA
0.0003383016379984057	NC_044377.1	25186401	25187999	+	45.4773	1598	Intergenic	Intergenic	75774	LOC115695061	LOC115695061	XM_030622158	uncharacterized LOC115695061	protein_coding	NA	NA	NA	NA	NA	NA
7.660482486869009e-05-2	NC_044377.1	43336801	43338399	+	45.4773	1598	Intergenic	Intergenic	-277381	LOC115695201	LOC115695201	XM_030622286	uncharacterized LOC115695201	protein_coding	NA	NA	NA	NA	NA	NA
0.0003383016379984057-2	NW_022060469.1	6001	7599	+	45.4773	1598	NA	NA	NA	NA			#N/A		NA	NA	NA	NA	NA	NA
1.7614767613241936e-05	NC_044377.1	63828401	63829599	+	45.4773	1198	exon	-exon (LOC115695364, exon 1 of 1)	817	LOC115695364	LOC115695364	XM_030622434	uncharacterized LOC115695364	protein_coding	NA	NA	NA	NA	NA	NA
7.660482486869009e-05-3	NC_044377.1	43767001	43769599	+	45.4773	2598	Intergenic	Intergenic	-335732	LOC115695668	LOC115695668	XM_030622727	uncharacterized protein At1g66480	protein_coding	-3.167632037	5.83816E-07	8.59824E-06	0.071708717	1	1
0.0015285655778062726	NC_044377.1	15896001	15896999	+	45.4773	998	Intergenic	Intergenic	-13454	LOC115695008	LOC115695008	XM_030622106	uncharacterized LOC115695008	protein_coding	NA	NA	NA	NA	NA	NA
9.250657238813297e-07	NC_044378.1	65514401	65516199	+	45.458	1798	Intergenic	Intergenic	28050	LOC115697844	LOC115697844	XM_030624987	protein PLASTID TRANSCRIPTIONALLY ACTIVE 12, chloroplastic,	protein_coding	1.265212738	0.221271264	0.833202256	1.081816188	0.705676045	1
0.000325578584850266	NC_044376.1	53096401	53097999	+	45.4389	1598	Intergenic	Intergenic	-330336	LOC115724380	LOC115724380	XR_004013173	small nucleolar RNA R71	snoRNA	NA	NA	NA	NA	NA	NA
3.8003932376548132e-06	NC_044377.1	32905801	32908799	+	45.4334	2998	Intergenic	Intergenic	-283824	LOC115695107	LOC115695107	XM_030622197	uncharacterized LOC115695107	protein_coding	NA	NA	NA	NA	NA	NA
0.0014701089867777519	NC_044377.1	52813001	52813999	+	45.4262	998	Intergenic	Intergenic	37610	LOC115695262	LOC115695262	XM_030622340	uncharacterized LOC115695262	protein_coding	NA	NA	NA	NA	NA	NA
0.0003133346093349299	NC_044375.1	41585401	41587599	+	45.401	2198	Intergenic	Intergenic	-13552	LOC115721365	LOC115721365	XM_030650650	10 kDa chaperonin, mitochondrial	protein_coding	-1.019686155	0.943755897	1	-0.031311204	1	1
1.0263417168306885e-08	NC_044376.1	39831001	39834799	+	45.3942	3798	Intergenic	Intergenic	-4164	LOC115723327	LOC115723327	XM_030652760	protein CYPRO4	protein_coding	-2.678186693	0.058276112	0.282318977	-3.093164509	0.017839901	0.130841825
0.001413894902130574	NC_044372.1	52650201	52651199	+	45.3761	998	Intergenic	Intergenic	-90107	LOC115710761	LOC115710761	XM_030639114	uncharacterized LOC115710761	protein_coding	NA	NA	NA	NA	NA	NA
1.7478592526275246e-07	NC_044373.1	66600001	66602999	+	45.3597	2998	promoter-TSS	-promoter-TSS (LOC115715358)	-1241	LOC115715358	LOC115715358	XR_004011234	small nucleolar RNA R71	snoRNA	NA	NA	NA	NA	NA	NA
1.4595691584121622e-05	NC_044373.1	71933401	71934999	+	45.3515	1598	Intergenic	Intergenic	20992	LOC115712644	LOC115712644	XM_030640951	L-type lectin-domain containing receptor kinase IX.1-like	protein_coding	-1.370280787	0.576366048	1	1.039595436	0.952824919	1
0.0013598374391921744	NC_044378.1	58060001	58061199	+	45.3271	1198	Intergenic	Intergenic	-38705	LOC115696680	LOC115696680	XM_030623570	uncharacterized LOC115696680	protein_coding	NA	NA	NA	NA	NA	NA
0.0013598374391921744-2	NW_022060348.1	139201	140399	+	45.3271	1198	Intergenic	Intergenic	-71826	LOC115702007	LOC115702007	XM_030629470	#N/A	protein_coding	NA	NA	NA	NA	NA	NA
0.0002902125136958055	NC_044374.1	44974601	44976799	+	45.3271	2198	Intergenic	Intergenic	-32006	LOC115717782	LOC115717782	XM_030646757	uncharacterized LOC115717782	protein_coding	NA	NA	NA	NA	NA	NA
6.33796744000882e-05	NC_044373.1	3153401	3155399	+	45.3271	1998	promoter-TSS	-promoter-TSS (LOC115715503)	-1037	LOC115715503	LOC115715503	XR_004011371	small nucleolar RNA R71	snoRNA	NA	NA	NA	NA	NA	NA
1.5069623490131737e-07	NC_044378.1	2270601	2275799	+	45.295	5198	Intergenic	Intergenic	13759	LOC115698291	LOC115698291	XM_030625505	transcription repressor OFP1	protein_coding	-0.775684234	1	1	1.585579146	0.195926309	0.886603447
0.0002793003605011828	NC_044370.1	59676001	59677599	+	45.2911	1598	Intergenic	Intergenic	-3687	LOC115722700	LOC115722700	XM_030651982	uncharacterized LOC115722700	protein_coding	NA	NA	NA	NA	NA	NA
1.303863644689791e-05	NC_044379.1	30976801	30980199	+	45.2792	3398	Intergenic	Intergenic	-12495	LOC115701032	LOC115701032	XM_030628715	kanadaptin,	protein_coding	-0.308695223	1	1	-0.427691984	1	1
0.0002687991705698739-2	NC_044377.1	56576801	56578599	+	45.2556	1798	Intergenic	Intergenic	16419	LOC115724891	LOC115724891	XM_030654257	sodium transporter HKT1	protein_coding	2.244782088	0.00393528	0.027538366	2.440176533	0.001006879	0.011744679
0.0002687991705698739	NC_044376.1	6424601	6426399	+	45.2556	1798	Intergenic	Intergenic	10424	LOC115724241	LOC115724241	XR_004013042	small nucleolar RNA R71	snoRNA	NA	NA	NA	NA	NA	NA
0.0002687991705698739-3	NC_044377.1	66460401	66462799	+	45.2556	2398	Intergenic	Intergenic	-12904	LOC115725677	LOC115725677	XM_030655262	uncharacterized LOC115725677	protein_coding	6.123964398	0.000119446	0.001185396	-1.726531262	0.252461924	1
0.001257864931253335	NC_044374.1	70362001	70363599	+	45.2322	1598	Intergenic	Intergenic	-24779	LOC115717106	LOC115717106	XM_030646049	protein LURP-one-related 11	protein_coding	-2.559665086	6.04024E-05	0.000638326	-3.293285906	3.5713E-09	1.2953E-07
0.00025869347599174726	NC_044372.1	57316801	57318999	+	45.2206	2198	Intergenic	Intergenic	33528	LOC115711795	LOC115711795	XR_004010669	small nucleolar RNA R71	snoRNA	NA	NA	NA	NA	NA	NA
5.494549124289566e-07	NC_044374.1	73067801	73070999	+	45.2033	3198	Intergenic	Intergenic	-2957	LOC115718315	LOC115718315	XR_004011894	small nucleolar RNA R71	snoRNA	NA	NA	NA	NA	NA	NA
5.2438684629018274e-05	NC_044374.1	62246401	62248199	+	45.1862	1798	Intergenic	Intergenic	16879	LOC115716129	LOC115716129	XM_030644859	TOM1-like protein 3,	protein_coding	-0.146526542	1	1	-0.048250821	1	1
5.2438684629018274e-05-2	NC_044375.1	34980401	34982599	+	45.1862	2198	Intergenic	Intergenic	32583	LOC115720044	LOC115720044	XM_030649209	uncharacterized LOC115720044	protein_coding	NA	NA	NA	NA	NA	NA
0.0012097938631495885-3	NC_044374.1	63063601	63064599	+	45.1862	998	Intergenic	Intergenic	5860	LOC115716835	LOC115716835	XR_004011609	uncharacterized LOC115716835	lncRNA	NA	NA	NA	NA	NA	NA
0.0012097938631495885-4	NC_044376.1	27795201	27796399	+	45.1862	1198	Intergenic	Intergenic	10431	LOC115724291	LOC115724291	XR_004013089	small nucleolar RNA R71	snoRNA	NA	NA	NA	NA	NA	NA
0.00024896838777331164	NC_044374.1	72215601	72216999	+	45.1862	1398	Intergenic	Intergenic	-226966	LOC115717117	LOC115717117	XM_030646063	SPX domain-containing membrane protein At4g22990,	protein_coding	1.48290583	0.0882296	0.398973794	1.740435318	0.009002601	0.074050923
0.0012097938631495885	NC_044371.1	60512201	60513599	+	45.1862	1398	Intergenic	Intergenic	-13573	LOC115705715	LOC115705715	XM_030633128	peroxisomal nicotinamide adenine dinucleotide carrier-like,	protein_coding	-1.965798178	7.67054E-06	9.48846E-05	-1.74867016	0.000541627	0.006904313
0.00024896838777331164-2	NC_044377.1	54450001	54451999	+	45.1862	1998	Intergenic	Intergenic	10328	LOC115695276	LOC115695276	XM_030622353	uncharacterized LOC115695276	protein_coding	NA	NA	NA	NA	NA	NA
0.0012097938631495885-2	NC_044373.1	46255201	46256399	+	45.1862	1198	Intergenic	Intergenic	23762	LOC115712828	LOC115712828	XM_030641217	inositol-3-phosphate synthase	protein_coding	5.597622062	1.06858E-47	3.54161E-45	2.075878199	0.000665951	0.008259081
1.0803847641599026e-05	NC_044376.1	33929201	33931999	+	45.1635	2798	Intergenic	Intergenic	-18502	LOC115722699	LOC115722699	XM_030651978	serine/threonine-protein kinase STY13,	protein_coding	-0.058306541	1	1	1.490188882	0.002347526	0.023977947
5.0488620643671346e-05	NC_044378.1	60144201	60146399	+	45.159	2198	Intergenic	Intergenic	-18984	LOC115698220	LOC115698220	XM_030625420	BOI-related E3 ubiquitin-protein ligase 1	protein_coding	0.284313361	1	1	-0.630967117	1	1
0.00023960957453729583	NC_044379.1	26859001	26860799	+	45.1523	1798	Intergenic	Intergenic	-53649	LOC115698870	LOC115698870	XM_030626076	bZIP transcription factor TGA10	protein_coding	-6.265508388	0.000129089	0.001273859	-6.544025082	5.49283E-05	0.000912607
0.0011635671484898982-2	NC_044377.1	60225401	60226599	+	45.1411	1198	Intergenic	Intergenic	-54497	LOC115725132	LOC115725132	XM_030654565	protein disulfide-isomerase 5-4	protein_coding	-0.263060716	1	1	0.084628625	1	1
0.0011635671484898982	NC_044371.1	54343401	54344399	+	45.1411	998	Intergenic	Intergenic	-567573	LOC115704145	LOC115704145	XM_030631362	uncharacterized LOC115704145	protein_coding	NA	NA	NA	NA	NA	NA
4.861113407711661e-05	NC_044376.1	47572001	47573999	+	45.1322	1998	Intergenic	Intergenic	16560	LOC115724223	LOC115724223	XR_004013025	small nucleolar RNA R71	snoRNA	NA	NA	NA	NA	NA	NA
0.00023060324197146187	NC_044375.1	90823401	90825799	+	45.1189	2398	intron	-intron (LOC115721407, intron 1 of 1)	2368	LOC115721407	LOC115721407	XM_030650693	uncharacterized LOC115721407	protein_coding	-0.15094457	1	1	1.033759544	0.957782039	1
0.0011191139826040644	NC_044370.1	57135401	57136799	+	45.0969	1398	Intergenic	Intergenic	10947	LOC115703463	LOC115703463	XR_004009225	small nucleolar RNA R71	snoRNA	NA	NA	NA	NA	NA	NA
2.01294846340649e-06	NC_044370.1	104666801	104670999	+	45.0907	4198	Intergenic	Intergenic	-12740	LOC115702345	LOC115702345	XM_030629808	probable alkaline/neutral invertase D	protein_coding	-1.025315137	0.919055793	1	-1.8219505	0.000953152	0.01122011
0.0002219361130033886	NC_044375.1	9138801	9140399	+	45.086	1598	Intergenic	Intergenic	-7096	LOC115718992	LOC115718992	XM_030647825	phytolongin Phyl2.2	protein_coding	-1.016722186	0.89923349	1	-0.623819656	1	1
9.295175731686093e-06-2	NC_044372.1	59186601	59189199	+	45.0752	2598	Intergenic	Intergenic	-13244	LOC115711446	LOC115711446	XM_030639791	uncharacterized LOC115711446	protein_coding	0	1	NA	-0.410947537	1	NA
9.295175731686093e-06	NC_044370.1	31463001	31465799	+	45.0752	2798	Intergenic	Intergenic	-4519	LOC115702408	LOC115702408	XR_004008867	uncharacterized LOC115702408	lncRNA	0	1	NA	-1.399014792	0.921130529	NA
1.939083148067347e-06	NC_044379.1	19543401	19546799	+	45.0721	3398	intron	-intron (LOC115699903, intron 3 of 3)	2039	LOC115699903	LOC115699903	XM_030627447	uncharacterized LOC115699903	protein_coding	-0.374376113	1	NA	0	1	NA
0.0010763662556953647-3	NC_044379.1	31556601	31557999	+	45.0536	1398	Intergenic	Intergenic	36060	LOC115700004	LOC115700004	XM_030627551	uncharacterized LOC115700004	protein_coding	NA	NA	NA	NA	NA	NA
0.0010763662556953647	NC_044375.1	6537401	6538599	+	45.0536	1198	Intergenic	Intergenic	10716	LOC115718597	LOC115718597	XM_030647408	uncharacterized LOC115718597	protein_coding	0.102300645	1	1	0.135652657	1	1
0.0010763662556953647-2	NC_044378.1	37421201	37422199	+	45.0536	998	Intergenic	Intergenic	-44177	LOC115697360	LOC115697360	XM_030624335	AP-4 complex subunit epsilon	protein_coding	-0.352461302	1	1	0.013087189	1	1
0.00020556882971894036	NC_044379.1	1760401	1762599	+	45.0217	2198	Intergenic	Intergenic	-1028289	LOC115698919	LOC115698919	XM_030626122	extracellular ribonuclease LE	protein_coding	-2.667802986	0.007814691	0.050323215	-6.151631711	1.46512E-17	1.49016E-15
0.0010352584536692379	NC_044376.1	34655001	34656199	+	45.0112	1198	Intergenic	Intergenic	23123	LOC115723276	LOC115723276	XM_030652719	DNA-directed RNA polymerase III subunit rpc9	protein_coding	0.332072395	1	1	0.587760385	1	1
1.529143906830625e-08	NC_044370.1	95139601	95142399	+	45.0028	2798	TTS	-TTS (LOC115703267)	161	LOC115703267	LOC115703267	XR_004009045	small nucleolar RNA R71	snoRNA	NA	NA	NA	NA	NA	NA
0.00019041114311259776	NC_044379.1	15160601	15162399	+	44.9593	1798	Intergenic	Intergenic	61225	LOC115701622	LOC115701622	XR_004008615	small nucleolar RNA R71	snoRNA	NA	NA	NA	NA	NA	NA
3.728625653275027e-05-2	NC_044378.1	971201	972599	+	44.9532	1398	Intergenic	Intergenic	-7116	LOC115697698	LOC115697698	XM_030624793	caffeic acid 3-O-methyltransferase 1	protein_coding	NA	NA	NA	NA	NA	NA
3.728625653275027e-05	NC_044375.1	22710001	22712599	+	44.9532	2598	exon	-exon (LOC115719953, exon 4 of 6)	2148	LOC115719953	LOC115719953	XM_030649124	uncharacterized LOC115719953	protein_coding	NA	NA	NA	NA	NA	NA
7.144222566096202e-06	NC_044370.1	26793001	26795599	+	44.9288	2598	intron	-intron (LOC115708359, intron 3 of 3)	-48859	LOC115703325	LOC115703325	XR_004009100	small nucleolar RNA R71	snoRNA	NA	NA	NA	NA	NA	NA
0.0001832576784214219	NC_044377.1	38915401	38916999	+	44.9288	1598	Intergenic	Intergenic	-7026	LOC115724816	LOC115724816	XM_030654166	calcium-dependent protein kinase 2	protein_coding	-0.349899054	1	1	-0.018051104	1	1
2.347124082451826e-09	NC_044372.1	43563401	43568799	+	44.9069	5398	Intergenic	Intergenic	3988	LOC115708870	LOC115708870	XM_030636883	uncharacterized LOC115708870,	protein_coding	-0.658583681	1	1	-0.12410803	1	1
3.4565637015411305e-05	NC_044374.1	43789001	43791199	+	44.9047	2198	Intergenic	Intergenic	-79991	LOC115716271	LOC115716271	XM_030645032	beta-adaptin-like protein B	protein_coding	-0.127677437	1	1	0.358124412	1	1
0.00017637359254733912	NC_044374.1	66420801	66422799	+	44.8987	1998	Intergenic	Intergenic	16130	LOC115718217	LOC115718217	XR_004011801	small nucleolar RNA R71	snoRNA	NA	NA	NA	NA	NA	NA
0.00017637359254733912-2	NC_044377.1	33056401	33058199	+	44.8987	1798	Intergenic	Intergenic	236099	LOC115696170	LOC115696170	XR_004007761	small nucleolar RNA R71	snoRNA	NA	NA	NA	NA	NA	NA
0.0009211563997500275	NC_044373.1	25325601	25326799	+	44.8888	1198	Intergenic	Intergenic	-19828	LOC115713277	LOC115713277	XM_030641758	uncharacterized LOC115713277	protein_coding	NA	NA	NA	NA	NA	NA
0.0008860017803043503-2	NC_044376.1	24330801	24332799	+	44.8495	1998	Intergenic	Intergenic	-9564	LOC115723194	LOC115723194	XM_030652629	tetratricopeptide repeat domain-containing protein PYG7, chloroplastic	protein_coding	1.438758145	0.03940626	0.202217443	1.079396576	0.704342889	1
0.0008860017803043503	NC_044371.1	55591001	55592599	+	44.8495	1598	exon	-exon (LOC115704146, exon 1 of 2)	740	LOC115704146	LOC115704146	XM_030631363	uncharacterized LOC115704146	protein_coding	NA	NA	NA	NA	NA	NA
0.0008860017803043503-3	NC_044378.1	52879001	52880199	+	44.8495	1198	Intergenic	Intergenic	26997	LOC115697318	LOC115697318	XM_030624265	ethylene-responsive transcription factor 4	protein_coding	-1.50171019	0.042977562	0.217696355	-2.28128686	2.09571E-07	5.72242E-06
2.9706109183747807e-05	NW_022060485.1	2001	4199	+	44.811	2198	Intergenic	Intergenic	-73383	LOC115702201	LOC115702201	XM_030629650	#N/A	protein_coding	NA	NA	NA	NA	NA	NA
0.00015723795240345632	NC_044373.1	40280401	40282599	+	44.811	2198	Intergenic	Intergenic	-8942	LOC115712708	LOC115712708	XM_030641044	uncharacterized LOC115712708	protein_coding	1.07787383	0.689760759	1	0.932615647	1	1
1.0661614546488639e-06	NC_044370.1	49824001	49827399	+	44.7947	3398	Intergenic	Intergenic	-21675	LOC115721323	LOC115721323	XM_030650597	uncharacterized LOC115721323	protein_coding	-2.6977427	0.551665726	1	-0.42574027	1	1
0.00015133358054027934-4	NC_044378.1	45573401	45575399	+	44.7825	1998	Intergenic	Intergenic	-2216	LOC115697291	LOC115697291	XM_030624234	ethylene response sensor 1,	protein_coding	-1.000164167	0.999467688	1	0.331194101	1	1
0.00015133358054027934	NC_044371.1	93877201	93878999	+	44.7825	1798	Intergenic	Intergenic	-4421	LOC115708361	LOC115708361	XR_004009861	small nucleolar RNA R71	snoRNA	NA	NA	NA	NA	NA	NA
0.00015133358054027934-3	NC_044375.1	40950801	40951799	+	44.7825	998	Intergenic	Intergenic	3087	LOC115720094	LOC115720094	XM_030649257	uncharacterized LOC115720094	protein_coding	NA	NA	NA	NA	NA	NA
0.00015133358054027934-2	NC_044373.1	52684001	52686599	+	44.7825	2598	Intergenic	Intergenic	-48765	LOC115712818	LOC115712818	XM_030641196	glucose-1-phosphate adenylyltransferase large subunit 1	protein_coding	-0.75305968	1	1	-0.030784499	1	1
0.0008196848281076717	NC_044375.1	256201	257799	+	44.7731	1598	exon	-exon (LOC115718605, exon 3 of 4)	522	LOC115718605	LOC115718605	XR_004011983	uncharacterized LOC115718605,	lncRNA	1.031206654	0.894362571	1	-0.084970771	1	1
2.7539212213802983e-05	NC_044379.1	5897401	5899399	+	44.7657	1998	Intergenic	Intergenic	-4466	LOC115701102	LOC115701102	XM_030628797	homeobox-leucine zipper protein ATHB-54-like	protein_coding	0.819603728	1	1	-1.988125155	0.091140449	0.4918565
5.093535215509721e-06	NC_044370.1	72378401	72382199	+	44.7545	3798	Intergenic	Intergenic	54324	LOC115714343	LOC115714343	XM_030643021	protein FREE1	protein_coding	0.518535404	1	1	-0.038453434	1	1
2.6515860715649645e-05	NC_044370.1	68537001	68539599	+	44.7434	2598	Intergenic	Intergenic	72613	LOC115706750	LOC115706750	XR_004009636	uncharacterized LOC115706750	lncRNA	NA	NA	NA	NA	NA	NA
0.0007884207955518721-2	NC_044373.1	75860601	75861799	+	44.736	1198	Intergenic	Intergenic	-43564	LOC115715166	LOC115715166	XM_030643987	uncharacterized protein At2g29880-like	protein_coding	NA	NA	NA	NA	NA	NA
0.0007884207955518721	NC_044370.1	21804601	21806399	+	44.736	1798	Intergenic	Intergenic	-7435	LOC115706511	LOC115706511	XM_030634182	ankyrin-1	protein_coding	3.442124437	4.86909E-19	2.81923E-17	1.956613688	0.000374029	0.005010419
8.397851458825521e-12	NC_044375.1	44091401	44098799	+	44.7073	7398	Intergenic	Intergenic	26579	LOC115720935	LOC115720935	XM_030650147	LOB domain-containing protein 12	protein_coding	3.487852881	0.388397124	NA	1.055144667	0.984093075	NA
0.00013492095834087163	NC_044374.1	57675001	57676599	+	44.6996	1598	Intergenic	Intergenic	-125747	LOC115716036	LOC115716036	XM_030644723	kinesin-like protein KIN-14J	protein_coding	-0.404571866	1	1	-1.060800693	0.82290807	1
0.0007583551655082225	NC_044376.1	27888601	27890199	+	44.6996	1598	Intergenic	Intergenic	30340	LOC115721786	LOC115721786	XR_004012694	uncharacterized LOC115721786	lncRNA	0.850870584	1	NA	2.950571785	0.625570303	NA
0.0007294418382170932	NC_044371.1	50037601	50039199	+	44.6638	1598	promoter-TSS	-promoter-TSS (LOC115704114)	1050	LOC115704115	LOC115704115	XM_030631335	uncharacterized LOC115704115	protein_coding	NA	NA	NA	NA	NA	NA
1.3862404463931068e-07	NC_044372.1	44452001	44456799	+	44.6462	4798	Intergenic	Intergenic	27674	LOC115711411	LOC115711411	XM_030639745	HVA22-like protein a	protein_coding	-0.37017925	1	1	-0.599369726	1	1
0.0007016364857771852	NC_044370.1	67239401	67240799	+	44.6287	1398	Intergenic	Intergenic	-150473	LOC115713556	LOC115713556	XM_030642046	protein NPGR1,	protein_coding	-1.940964884	0.001145461	0.009263437	-1.10651835	0.717859013	1
0.00012029275860323552	NC_044370.1	21799601	21801399	+	44.62	1798	Intergenic	Intergenic	-12435	LOC115706511	LOC115706511	XM_030634182	ankyrin-1	protein_coding	3.442124437	4.86909E-19	2.81923E-17	1.956613688	0.000374029	0.005010419
0.0006748964848937876-2	NW_022060528.1	92001	93199	+	44.5942	1198	intron	-intron (LOC115702303, intron 1 of 3)	10242	LOC115702303	LOC115702303	XM_030629749	#N/A	protein_coding	NA	NA	NA	NA	NA	NA
0.0006748964848937876	NC_044370.1	25536201	25537999	+	44.5942	1798	promoter-TSS	-promoter-TSS (LOC115708013)	564	LOC115719208	LOC115719208	XM_030648163	uncharacterized LOC115719208	protein_coding	NA	NA	NA	NA	NA	NA
3.2446256040824806e-06	NC_044374.1	33179201	33182999	+	44.5435	3798	Intergenic	Intergenic	-15107	LOC115716332	LOC115716332	XM_030645099	probable methyltransferase PMT24	protein_coding	0.004104673	1	1	0.642426646	1	1
0.0006244501811540236-2	NC_044373.1	23190201	23191199	+	44.527	998	Intergenic	Intergenic	-23199	LOC115713075	LOC115713075	XM_030641558	DExH-box ATP-dependent RNA helicase DExH10	protein_coding	0.136708105	1	1	0.410777837	1	1
0.0006244501811540236	NC_044373.1	2570001	2571199	+	44.527	1198	Intergenic	Intergenic	-15067	LOC115714189	LOC115714189	XM_030642767	protein TIFY 6B,	protein_coding	1.804836987	0.022301327	0.124008795	0.356602949	1	1
0.00010323143045977705	NC_044373.1	53165001	53166599	+	44.5187	1598	Intergenic	Intergenic	182644	LOC115713504	LOC115713504	XM_030641986	uncharacterized LOC115713504	protein_coding	NA	NA	NA	NA	NA	NA
9.935958212969106e-05	NC_044378.1	33888201	33890199	+	44.4942	1998	Intergenic	Intergenic	-28513	LOC115698393	LOC115698393	XR_004008142	small nucleolar RNA R71	snoRNA	NA	NA	NA	NA	NA	NA
9.563337283223694e-05	NC_044373.1	45186801	45189199	+	44.4701	2398	Intergenic	Intergenic	-11539	LOC115713449	LOC115713449	XM_030641934	nucleolar protein dao-5-like	protein_coding	NA	NA	NA	NA	NA	NA
0.0005777936285050967-3	NC_044374.1	14766801	14768999	+	44.4621	2198	Intergenic	Intergenic	-23723	LOC115718181	LOC115718181	XM_030647146	serine/arginine-rich splicing factor RS40,	protein_coding	-0.179227254	1	1	-0.05761452	1	1
0.0005777936285050967-2	NC_044370.1	61580801	61582199	+	44.4621	1398	Intergenic	Intergenic	21651	LOC115722901	LOC115722901	XM_030652267	nucleolar and coiled-body phosphoprotein 1-like	protein_coding	NA	NA	NA	NA	NA	NA
0.0005777936285050967	NC_044370.1	28360601	28361999	+	44.4621	1398	Intergenic	Intergenic	-3829	LOC115703319	LOC115703319	XR_004009094	small nucleolar RNA R71	snoRNA	NA	NA	NA	NA	NA	NA
7.931969657311735e-08	NC_044376.1	58738601	58742799	+	44.4581	4198	Intergenic	Intergenic	-10266	LOC115723987	LOC115723987	XM_030653444	polygalacturonase	protein_coding	NA	NA	NA	NA	NA	NA
2.5898093215381196e-06	NC_044374.1	65978801	65981799	+	44.4462	2998	Intergenic	Intergenic	28166	LOC115718305	LOC115718305	XR_004011885	small nucleolar RNA R71	snoRNA	NA	NA	NA	NA	NA	NA
0.000555796290835428	NC_044378.1	61313601	61314599	+	44.4304	998	Intergenic	Intergenic	-47457	LOC115696702	LOC115696702	XM_030623592	putative disease resistance protein At1g50180	protein_coding	NA	NA	NA	NA	NA	NA
0.0005346408936825513-3	NC_044373.1	35809601	35810999	+	44.3993	1398	Intergenic	Intergenic	-15987	LOC115712711	LOC115712711	XM_030641049	protein FREE1,	protein_coding	-0.167539871	1	1	-0.325677234	1	1
2.313810556050949e-06	NC_044374.1	49282401	49286999	+	44.3993	4598	Intergenic	Intergenic	-22971	LOC115716917	LOC115716917	XM_030645838	serine/threonine-protein kinase pakG	protein_coding	2.706847249	0.017367351	0.100015754	-0.650537611	1	1
0.0005346408936825513	NC_044371.1	85742401	85744199	+	44.3993	1798	Intergenic	Intergenic	-8591	LOC115706371	LOC115706371	XM_030633992	growth-regulating factor 9	protein_coding	2.141307751	4.77357E-07	7.15217E-06	1.753099824	0.00083724	0.009990228
0.0005346408936825513-2	NC_044372.1	20587201	20588999	+	44.3993	1798	Intergenic	Intergenic	-8452	LOC115711802	LOC115711802	XR_004010675	small nucleolar RNA R71	snoRNA	NA	NA	NA	NA	NA	NA
8.207816183180295e-05	NC_044372.1	47927801	47930399	+	44.3764	2598	Intergenic	Intergenic	-45948	LOC115710738	LOC115710738	XM_030639092	uncharacterized LOC115710738	protein_coding	NA	NA	NA	NA	NA	NA
0.0005142950585467495	NC_044372.1	67778801	67779999	+	44.3688	1198	Intergenic	Intergenic	95929	LOC115711592	LOC115711592	XM_030639957	uncharacterized LOC115711592,	protein_coding	3.035134338	4.71912E-11	1.22258E-09	1.281073435	0.35683695	1
0.0005142950585467495-2	NC_044376.1	48961201	48962399	+	44.3688	1198	Intergenic	Intergenic	-16344	LOC115722279	LOC115722279	XM_030651444	uncharacterized LOC115722279,	protein_coding	-0.745848649	1	1	-0.365295561	1	1
0.0005142950585467495-3	NC_044379.1	60531801	60533199	+	44.3688	1398	Intergenic	Intergenic	-3693	LOC115701650	LOC115701650	XR_004008641	small nucleolar RNA R71	snoRNA	NA	NA	NA	NA	NA	NA
7.900180778788373e-05	NC_044376.1	1174001	1176599	+	44.3537	2598	Intergenic	Intergenic	-11136	LOC115722598	LOC115722598	XM_030651841	uncharacterized LOC115722598	protein_coding	-0.977983866	1	1	-1.217189877	0.546175368	1
0.0004947276551439807	NC_044375.1	62106201	62107599	+	44.3387	1398	Intergenic	Intergenic	-45655	LOC115720242	LOC115720242	XM_030649399	uncharacterized LOC115720242	protein_coding	NA	NA	NA	NA	NA	NA
0.0004947276551439807-2	NC_044378.1	39775001	39776399	+	44.3387	1398	Intergenic	Intergenic	3874	LOC115696563	LOC115696563	XM_030623457	uncharacterized LOC115696563	protein_coding	NA	NA	NA	NA	NA	NA
5.267483728870979e-08	NC_044375.1	73514601	73517999	+	44.3313	3398	Intergenic	Intergenic	-8870	LOC115718952	LOC115718952	XM_030647780	serine/threonine-protein phosphatase PP1 isozyme 2,	protein_coding	-0.015738344	1	1	0.507713249	1	1
7.31916854456765e-05	NC_044379.1	11759401	11761799	+	44.3092	2398	Intergenic	Intergenic	5480	LOC115700904	LOC115700904	XM_030628571	sorting nexin 1,	protein_coding	-0.123968435	1	1	0.064554829	1	1
1.1533306430748087e-05	NC_044370.1	29381801	29384399	+	44.3092	2598	Intergenic	Intergenic	-49368	LOC115709434	LOC115709434	XM_030637545	WAT1-related protein At1g43650,	protein_coding	-5.788542096	1.71576E-09	3.70169E-08	-0.718217325	1	1
1.7133660043690234e-06	NC_044375.1	14308001	14311599	+	44.2801	3598	Intergenic	Intergenic	-4406	LOC115719877	LOC115719877	XM_030649056	NADH dehydrogenase [ubiquinone] 1 alpha subcomplex subunit 8-B-like	protein_coding	-0.179000536	1	1	0.000532555	1	1
6.781009993950843e-05	NC_044376.1	5851601	5854599	+	44.2657	2998	Intergenic	Intergenic	4635	LOC115721765	LOC115721765	XM_030650842	putative bifunctional UDP-N-acetylglucosamine transferase and deubiquitinase ALG13	protein_coding	0.460374592	1	1	0.912902165	1	1
1.0296564864108444e-05	NC_044372.1	72414001	72416599	+	44.2571	2598	Intergenic	Intergenic	-14473	LOC115710903	LOC115710903	XM_030639254	uncharacterized LOC115710903	protein_coding	2.481914322	0.713392848	NA	2.445382691	0.720161746	NA
9.546785604460533e-06-2	NC_044377.1	31231801	31233999	+	44.2233	2198	intron	-intron (LOC115724890, intron 5 of 6)	4800	LOC115724890	LOC115724890	XM_030654256	formin-like protein 5	protein_coding	0.002570217	1	1	0.049163668	1	1
9.546785604460533e-06	NC_044373.1	10221801	10224599	+	44.2233	2798	Intergenic	Intergenic	-36058	LOC115715387	LOC115715387	XR_004011261	small nucleolar RNA R71	snoRNA	NA	NA	NA	NA	NA	NA
0.0004236608068775862	NC_044371.1	50174401	50175799	+	44.2233	1398	Intergenic	Intergenic	-12695	LOC115705491	LOC115705491	XM_030632829	uncharacterized LOC115705491,	protein_coding	0.281642229	1	1	-0.000238761	1	1
0.00037717777175774714	NC_044370.1	40161001	40162599	+	44.1415	1598	Intergenic	Intergenic	23149	LOC115710739	LOC115710739	XM_030639095	putative invertase inhibitor	protein_coding	-0.816863134	1	1	-2.848248327	0.076060748	0.426895112
0.0003628519063828867	NC_044374.1	64720001	64721599	+	44.1151	1598	Intergenic	Intergenic	-68172	LOC115717906	LOC115717906	XM_030646874	uncharacterized LOC115717906	protein_coding	NA	NA	NA	NA	NA	NA
4.996948788884282e-05	NC_044373.1	37561601	37564399	+	44.102	2798	promoter-TSS	-promoter-TSS (LOC115713376)	-1792	LOC115713376	LOC115713376	XM_030641858	uncharacterized LOC115713376	protein_coding	NA	NA	NA	NA	NA	NA
0.00034907312842098905	NC_044378.1	48103401	48104999	+	44.0891	1598	Intergenic	Intergenic	-30506	LOC115696946	LOC115696946	XR_004007835	uncharacterized LOC115696946, 1	lncRNA	0.436192891	1	1	0.625387096	1	1
4.809946689147204e-05	NC_044376.1	56821601	56824799	+	44.0826	3198	Intergenic	Intergenic	4028	LOC115722905	LOC115722905	XM_030652271	probable transmembrane ascorbate ferrireductase 3	protein_coding	-6.04321858	0.000123999	0.001226778	-6.619142463	1.77504E-05	0.000333544
0.000335820431087964	NC_044374.1	32782601	32784599	+	44.0634	1998	Intergenic	Intergenic	-2321	LOC115717322	LOC115717322	XM_030646294	protein COFACTOR ASSEMBLY OF COMPLEX C SUBUNIT B CCB2, chloroplastic-like,	protein_coding	1.140501064	0.499982263	1	0.823452047	1	1
0.000335820431087964-3	NC_044377.1	26395601	26397599	+	44.0634	1998	Intergenic	Intergenic	71782	LOC115724541	LOC115724541	XM_030653845	trafficking protein particle complex II-specific subunit 120 homolog	protein_coding	-0.614862163	1	1	-0.525730556	1	1
4.62996432273287e-05	NC_044374.1	52372601	52374599	+	44.0634	1998	Intergenic	Intergenic	-6484	LOC115717330	LOC115717330	XM_030646302	mitogen-activated protein kinase kinase kinase YODA,	protein_coding	0.047690917	1	1	0.192575664	1	1
4.62996432273287e-05-2	NC_044375.1	62467401	62470199	+	44.0634	2798	Intergenic	Intergenic	6785	LOC115720243	LOC115720243	XM_030649400	uncharacterized LOC115720243	protein_coding	NA	NA	NA	NA	NA	NA
0.000335820431087964-2	NC_044374.1	76949601	76950999	+	44.0634	1398	Intergenic	Intergenic	599742	LOC115718006	LOC115718006	XM_030646974	uncharacterized LOC115718006	protein_coding	0	1	NA	-0.410947537	1	NA
9.051790982680135e-07	NC_044375.1	54168601	54172199	+	44.0508	3598	Intergenic	Intergenic	-189062	LOC115720200	LOC115720200	XM_030649356	uncharacterized LOC115720200	protein_coding	NA	NA	NA	NA	NA	NA
6.300107601995698e-06	NC_044371.1	42981801	42984399	+	44.0483	2598	Intergenic	Intergenic	18304	LOC115708374	LOC115708374	XR_004009874	small nucleolar RNA R71	snoRNA	NA	NA	NA	NA	NA	NA
0.00032307361787377276-3	NC_044378.1	43010001	43010999	+	44.0382	998	Intergenic	Intergenic	-10961	LOC115697102	LOC115697102	XM_030624008	uncharacterized LOC115697102	protein_coding	-5.256101461	0.033359437	0.175209962	-3.087640028	0.310548959	1
8.718468495422805e-07	NC_044377.1	18670601	18673799	+	44.0382	3198	Intergenic	Intergenic	29013	LOC115725481	LOC115725481	XM_030655018	truncated FRIGIDA-like protein 1	protein_coding	0.244597529	1	1	0.143473746	1	1
0.00032307361787377276	NC_044373.1	61753801	61755399	+	44.0382	1598	Intergenic	Intergenic	5621	LOC115715004	LOC115715004	XR_004011159	uncharacterized LOC115715004	lncRNA	NA	NA	NA	NA	NA	NA
0.00032307361787377276-2	NC_044374.1	5453201	5454599	+	44.0382	1398	Intergenic	Intergenic	8806	LOC115717022	LOC115717022	XM_030645949	uncharacterized LOC115717022,	protein_coding	0.1515772	1	1	-0.440610879	1	1
6.066597772763893e-06	NC_044379.1	7610201	7613199	+	44.0332	2998	Intergenic	Intergenic	-31744	LOC115699789	LOC115699789	XM_030627334	protein FAR1-RELATED SEQUENCE 9-like	protein_coding	NA	NA	NA	NA	NA	NA
4.290011552955288e-05-2	NC_044374.1	61124801	61126999	+	44.0258	2198	Intergenic	Intergenic	-86478	LOC115717880	LOC115717880	XM_030646850	uncharacterized LOC115717880	protein_coding	NA	NA	NA	NA	NA	NA
4.290011552955288e-05	NC_044374.1	26483801	26484799	+	44.0258	998	Intergenic	Intergenic	81424	LOC115716389	LOC115716389	XM_030645174	zinc finger protein ZAT1	protein_coding	-0.223567639	1	1	-2.415481006	1.66678E-06	3.81435E-05
5.841759033806885e-06	NC_044378.1	47712401	47714599	+	44.0183	2198	Intergenic	Intergenic	-142347	LOC115698399	LOC115698399	XR_004008148	small nucleolar RNA R71	snoRNA	NA	NA	NA	NA	NA	NA
0.0003108132712440199	NC_044378.1	12739401	12741599	+	44.0134	2198	Intergenic	Intergenic	16415	LOC115698006	LOC115698006	XM_030625185	protein RALF-like 4	protein_coding	0.257416023	1	1	-2.756158817	0.087674022	0.477573739
0.0023454482238073238-2	NC_044378.1	29571601	29572799	+	43.9889	1198	Intergenic	Intergenic	23768	LOC115697904	LOC115697904	XM_030625073	uncharacterized LOC115697904	protein_coding	-1.408533312	0.742762893	1	-2.419456169	0.249044934	1
0.0023454482238073238	NC_044371.1	54586201	54587199	+	43.9889	998	Intergenic	Intergenic	-324773	LOC115704145	LOC115704145	XM_030631362	uncharacterized LOC115704145	protein_coding	NA	NA	NA	NA	NA	NA
0.0002990207225421627	NC_044378.1	34191801	34193799	+	43.9889	1998	Intergenic	Intergenic	17085	LOC115697909	LOC115697909	XM_030625076	kiwellin-like	protein_coding	1.549145827	0.892944328	NA	-1.298708739	0.940099855	NA
3.826439247625309e-05	NC_044370.1	7698201	7700999	+	43.9708	2798	Intergenic	Intergenic	8391	LOC115703926	LOC115703926	XM_030631356	crocetin glucosyltransferase 3	protein_coding	0.674523701	1	1	-0.329534665	1	1
0.00028767802304758465-2	NC_044378.1	57261401	57262999	+	43.9648	1598	Intergenic	Intergenic	29313	LOC115697476	LOC115697476	XM_030624498	alcohol dehydrogenase-like 6	protein_coding	0.059217584	1	1	0.468811461	1	1
0.00028767802304758465	NC_044377.1	76867401	76869399	+	43.9648	1998	Intergenic	Intergenic	-16094	LOC115724504	LOC115724504	XM_030653798	uncharacterized LOC115724504,	protein_coding	-0.499811306	1	1	-1.018326575	0.970213817	1
0.0022542199912548243-2	NC_044377.1	25636801	25637799	+	43.9529	998	Intergenic	Intergenic	40631	LOC115696115	LOC115696115	XR_004007710	small nucleolar RNA R71	snoRNA	NA	NA	NA	NA	NA	NA
0.0022542199912548243	NC_044374.1	3568601	3569599	+	43.9529	998	TTS	-TTS (LOC115718327)	690	LOC115718327	LOC115718327	XR_004011906	small nucleolar RNA R71	snoRNA	NA	NA	NA	NA	NA	NA
4.836753131664962e-06	NC_044377.1	2359001	2360799	+	43.9458	1798	TTS	-TTS (LOC115725716)	1164	LOC115725716	LOC115725716	XM_030655313	uncharacterized LOC115725716	protein_coding	0	1	NA	-0.410947537	1	NA
0.00027676791614631113	NC_044379.1	21340001	21341399	+	43.9411	1398	Intergenic	Intergenic	43067	LOC115698728	LOC115698728	XM_030625874	uncharacterized endoplasmic reticulum membrane protein C16E8.02	protein_coding	-0.448395781	1	1	0.584392887	1	1
3.545649575976039e-05	NC_044373.1	40260201	40261999	+	43.9352	1798	Intergenic	Intergenic	-6694	LOC115712709	LOC115712709	XM_030641045	translocator protein homolog	protein_coding	0.197179772	1	1	-1.002663859	0.99436213	1
0.0002662738105726123	NC_044376.1	32088401	32090999	+	43.9176	2598	Intergenic	Intergenic	24848	LOC115723347	LOC115723347	XM_030652790	protein SIEVE ELEMENT OCCLUSION B	protein_coding	0.822145303	1	1	-9.14270719	3.27684E-36	1.23511E-33
5.991542595306639e-07	NC_044374.1	46367001	46370799	+	43.9176	3798	Intergenic	Intergenic	28734	LOC115716797	LOC115716797	XM_030645701	ferredoxin-thioredoxin reductase catalytic chain, chloroplastic	protein_coding	1.846805981	1.89479E-05	0.000219155	1.348745949	0.077658701	0.433585014
3.413102461355787e-05-2	NC_044378.1	35283401	35285799	+	43.9176	2398	Intergenic	Intergenic	-41306	LOC115697302	LOC115697302	XM_030624248	probable pre-mRNA-splicing factor ATP-dependent RNA helicase DEAH9,	protein_coding	-0.36277675	1	1	-0.335775776	1	1
3.413102461355787e-05	NC_044374.1	4459801	4462599	+	43.9176	2798	Intergenic	Intergenic	-8844	LOC115717489	LOC115717489	XM_030646475	uncharacterized LOC115717489	protein_coding	NA	NA	NA	NA	NA	NA
4.485041826040152e-06	NC_044376.1	56161601	56164399	+	43.9176	2798	Intergenic	Intergenic	-4135	LOC115724273	LOC115724273	XR_004013072	small nucleolar RNA R71	snoRNA	NA	NA	NA	NA	NA	NA
0.0021665786679650875	NC_044374.1	65919801	65920799	+	43.9176	998	Intergenic	Intergenic	-31834	LOC115718305	LOC115718305	XR_004011885	small nucleolar RNA R71	snoRNA	NA	NA	NA	NA	NA	NA
3.285525574389065e-05	NC_044375.1	60952801	60955199	+	43.9003	2398	Intergenic	Intergenic	-3552	LOC115718473	LOC115718473	XM_030647258	serine carboxypeptidase-like 20	protein_coding	1.078771178	0.859822698	1	1.751139409	0.098081076	0.520852662
3.285525574389065e-05-2	NW_022060476.1	256601	258799	+	43.9003	2198	Intergenic	Intergenic	-474100	LOC115702188	LOC115702188	XM_030629636	#N/A	protein_coding	NA	NA	NA	NA	NA	NA
0.002082381604227331	NC_044370.1	86799601	86800599	+	43.8832	998	Intergenic	Intergenic	-69023	LOC115695432	LOC115695432	XM_030622504	uncharacterized LOC115695432,	protein_coding	-1.093493292	0.776493556	1	-1.933384451	0.004505105	0.041595401
0.002082381604227331-2	NC_044379.1	15630401	15631599	+	43.8832	1198	Intergenic	Intergenic	56081	LOC115699352	LOC115699352	XM_030626707	homeobox-leucine zipper protein ATHB-13	protein_coding	-2.952088709	4.05751E-06	5.25945E-05	-0.63554862	1	1
0.00023713103600384394	NC_044370.1	44021401	44023599	+	43.8495	2198	Intergenic	Intergenic	9620	LOC115720748	LOC115720748	XM_030649926	uncharacterized mitochondrial protein AtMg00860-like	protein_coding	NA	NA	NA	NA	NA	NA
2.821285401169073e-05	NC_044370.1	20740001	20741999	+	43.8329	1998	exon	-exon (LOC115717929, exon 3 of 4)	1984	LOC115717929	LOC115717929	XM_030646898	uncharacterized LOC115717929	protein_coding	0.587405102	1	NA	-2.318046374	0.52383738	NA
0.00022814745013936908	NC_044374.1	4219601	4221599	+	43.8274	1998	Intergenic	Intergenic	-11760	LOC115715964	LOC115715964	XR_004011495	uncharacterized LOC115715964	lncRNA	NA	NA	NA	NA	NA	NA
2.715892441693966e-05	NC_044374.1	60234001	60237399	+	43.8164	3398	Intergenic	Intergenic	-220455	LOC115717877	LOC115717877	XM_030646848	uncharacterized LOC115717877	protein_coding	NA	NA	NA	NA	NA	NA
0.00021950602295545474	NC_044377.1	12584401	12585999	+	43.8056	1598	Intergenic	Intergenic	-11352	LOC115696068	LOC115696068	XR_004007666	small nucleolar RNA R71	snoRNA	NA	NA	NA	NA	NA	NA
2.614448587695597e-05	NC_044378.1	37304401	37307399	+	43.8002	2998	Intergenic	Intergenic	-21265	LOC115696541	LOC115696541	XM_030623437	pentatricopeptide repeat-containing protein At3g22670, mitochondrial-like	protein_coding	NA	NA	NA	NA	NA	NA
0.0018491140236736058	NC_044373.1	53822401	53822999	+	43.7841	598	Intergenic	Intergenic	55230	LOC115714286	LOC115714286	XM_030642932	dnaJ homolog subfamily B member 4	protein_coding	-1.544944803	0.026016299	0.141813076	-1.679071491	0.005478867	0.04896339
2.5168053975844875e-05	NC_044378.1	29658401	29660599	+	43.7841	2198	Intergenic	Intergenic	-22622	LOC115696884	LOC115696884	XM_030623772	cannabidiolic acid synthase-like 1	protein_coding	-2.237542301	0.385145075	1	-9.596601091	2.50511E-12	1.38379E-10
2.961571617762228e-06	NC_044374.1	15499401	15500799	+	43.7714	1398	Intergenic	Intergenic	-58687	LOC115715967	LOC115715967	XM_030644645	protein HOTHEAD-like	protein_coding	0	1	1	-5.920325086	0.010332604	0.082898013
2.4228200266287487e-05	NC_044377.1	23569401	23572399	+	43.7682	2998	Intergenic	Intergenic	24364	LOC115695937	LOC115695937	XM_030623036	villin-4,	protein_coding	-0.606606388	1	1	-0.338155468	1	1
0.00020319772529857238	NC_044375.1	71469801	71471999	+	43.763	2198	intron	-intron (LOC115721200, intron 5 of 12)	6574	LOC115721200	LOC115721200	XM_030650460	respiratory burst oxidase homolog protein B,	protein_coding	NA	NA	NA	NA	NA	NA
0.0017773786649234549	NC_044375.1	44956401	44958199	+	43.7525	1798	Intergenic	Intergenic	-148326	LOC115721173	LOC115721173	XM_030650426	NADPH-dependent aldehyde reductase 1, chloroplastic-like	protein_coding	0	1	1	-7.206904317	0.000258441	0.003625484
0.0017773786649234549-2	NC_044376.1	9171201	9172199	+	43.7525	998	Intergenic	Intergenic	-8592	LOC115722334	LOC115722334	XM_030651527	CASP-like protein 1D1	protein_coding	-3.65216495	3.51309E-05	0.000388116	-5.048690541	2.65402E-10	1.12375E-08
2.746415719189464e-06	NC_044377.1	55286601	55289599	+	43.7462	2998	promoter-TSS	-promoter-TSS (LOC115696038)	-1766	LOC115696038	LOC115696038	XR_004007639	small nucleolar RNA R71	snoRNA	NA	NA	NA	NA	NA	NA
0.00019550613766272006	NC_044370.1	68079401	68081999	+	43.7421	2598	Intergenic	Intergenic	-19579	LOC115713674	LOC115713674	XM_030642161	uncharacterized LOC115713674	protein_coding	NA	NA	NA	NA	NA	NA
0.00018810723608084608	NC_044374.1	20487601	20489399	+	43.7215	1798	Intergenic	Intergenic	13992	LOC115715993	LOC115715993	XM_030644682	protein PARTING DANCERS-like,	protein_coding	-3.665989123	0.066341344	0.314030942	-2.511266095	0.312397463	1
0.0017084557682843693-2	NC_044372.1	52139401	52140799	+	43.7215	1398	Intergenic	Intergenic	-4755	LOC115710760	LOC115710760	XM_030639112	uncharacterized LOC115710760	protein_coding	NA	NA	NA	NA	NA	NA
0.0017084557682843693	NC_044371.1	6060601	6061799	+	43.7215	1198	Intergenic	Intergenic	-29700	LOC115703717	LOC115703717	XM_030630951	uncharacterized mitochondrial protein AtMg00810-like	protein_coding	NA	NA	NA	NA	NA	NA
2.161461947054836e-05	NC_044371.1	57340201	57342799	+	43.7215	2598	Intergenic	Intergenic	10815	LOC115704158	LOC115704158	XM_030631374	uncharacterized LOC115704158	protein_coding	NA	NA	NA	NA	NA	NA
0.0017084557682843693-3	NC_044374.1	23652801	23653999	+	43.7215	1198	Intergenic	Intergenic	71533	LOC115718319	LOC115718319	XR_004011898	small nucleolar RNA R71	snoRNA	NA	NA	NA	NA	NA	NA
0.00018098981959082053	NC_044373.1	37252201	37253199	+	43.7012	998	Intergenic	Intergenic	-37522	LOC115715514	LOC115715514	XR_004011382	small nucleolar RNA R71	snoRNA	NA	NA	NA	NA	NA	NA
0.0016422337748725237-3	NC_044379.1	21596001	21597199	+	43.6911	1198	Intergenic	Intergenic	12487	LOC115700995	LOC115700995	XR_004008478	uncharacterized LOC115700995	lncRNA	0	1	NA	-0.410947537	1	NA
0.0016422337748725237-2	NC_044376.1	58733801	58734999	+	43.6911	1198	Intergenic	Intergenic	10033	LOC115723986	LOC115723986	XM_030653443	polygalacturonase-like	protein_coding	NA	NA	NA	NA	NA	NA
2.003126677837342e-05	NC_044379.1	11739801	11742399	+	43.6911	2598	Intergenic	Intergenic	24980	LOC115700904	LOC115700904	XM_030628571	sorting nexin 1,	protein_coding	-0.123968435	1	1	0.064554829	1	1
0.0016422337748725237	NC_044376.1	17014401	17015599	+	43.6911	1198	Intergenic	Intergenic	-5875	LOC115723620	LOC115723620	XM_030653105	uncharacterized LOC115723620	protein_coding	NA	NA	NA	NA	NA	NA
3.186840228192375e-08	NC_044371.1	80748001	80752599	+	43.6869	4598	Intergenic	Intergenic	3365	LOC115704405	LOC115704405	XM_030631614	uncharacterized LOC115704405	protein_coding	NA	NA	NA	NA	NA	NA
0.00017414311834954683-2	NC_044377.1	19822201	19823799	+	43.6812	1598	Intergenic	Intergenic	-44955	LOC115724911	LOC115724911	XM_030654283	citrate synthase, mitochondrial	protein_coding	-0.420171975	1	1	-0.008620856	1	1
0.00017414311834954683	NC_044370.1	77775201	77776799	+	43.6812	1598	Intergenic	Intergenic	-10058	LOC115717605	LOC115717605	XM_030646589	universal stress protein PHOS34,	protein_coding	-0.304232399	1	1	-0.057552165	1	1
1.7204955615467555e-05	NC_044376.1	38054001	38056599	+	43.6322	2598	Intergenic	Intergenic	3223	LOC115724372	LOC115724372	XR_004013165	small nucleolar RNA R71	snoRNA	NA	NA	NA	NA	NA	NA
0.000155125728802168	NC_044376.1	56333201	56335999	+	43.6227	2798	Intergenic	Intergenic	-10077	LOC115722917	LOC115722917	XM_030652290	60S ribosomal protein L9,	protein_coding	-0.570500035	1	1	0.096311434	1	1
0.0014587236815655038-2	NC_044377.1	27208401	27209599	+	43.6037	1198	Intergenic	Intergenic	-77509	LOC115696021	LOC115696021	XR_004007622	small nucleolar RNA R71	snoRNA	NA	NA	NA	NA	NA	NA
0.0014587236815655038	NC_044372.1	27728001	27729399	+	43.6037	1398	Intergenic	Intergenic	-3574	LOC115711853	LOC115711853	XR_004010721	small nucleolar RNA R71	snoRNA	NA	NA	NA	NA	NA	NA
0.0014587236815655038-3	NC_044377.1	30927601	30928999	+	43.6037	1398	Intergenic	Intergenic	30204	LOC115695723	LOC115695723	XR_004007539	uncharacterized LOC115695723,	lncRNA	0.091423747	1	1	-0.010335271	1	1
0.0014587236815655038-4	NC_044379.1	22782401	22783799	+	43.6037	1398	Intergenic	Intergenic	-14394	LOC115699933	LOC115699933	XM_030627481	uncharacterized LOC115699933	protein_coding	NA	NA	NA	NA	NA	NA
0.00014362152707629315-3	NC_044377.1	38486401	38488999	+	43.5849	2598	Intergenic	Intergenic	-29014	LOC115695165	LOC115695165	XM_030622256	uncharacterized LOC115695165	protein_coding	NA	NA	NA	NA	NA	NA
0.00014362152707629315	NC_044375.1	55119801	55121799	+	43.5849	1998	Intergenic	Intergenic	-33320	LOC115720922	LOC115720922	XM_030650131	E3 ubiquitin-protein ligase BIG BROTHER,	protein_coding	-0.755367482	1	1	-0.954018079	1	1
0.00014362152707629315-2	NC_044375.1	80808601	80810399	+	43.5849	1798	Intergenic	Intergenic	-5220	LOC115718486	LOC115718486	XR_004011937	uncharacterized LOC115718486	lncRNA	NA	NA	NA	NA	NA	NA
0.0014022765554444374-4	NC_044376.1	36521001	36522799	+	43.5757	1798	Intergenic	Intergenic	-8473	LOC115722229	LOC115722229	XM_030651385	helicase-like transcription factor CHR28,	protein_coding	-0.067648203	1	1	-0.086077022	1	1
0.0014022765554444374-3	NC_044376.1	14661401	14662599	+	43.5757	1198	promoter-TSS	-promoter-TSS (LOC115724305)	-1845	LOC115724305	LOC115724305	XR_004013103	small nucleolar RNA R71	snoRNA	NA	NA	NA	NA	NA	NA
0.0014022765554444374-5	NC_044377.1	48664201	48665399	+	43.5757	1198	promoter-TSS	-promoter-TSS (LOC115695229)	-1840	LOC115695229	LOC115695229	XM_030622308	uncharacterized LOC115695229	protein_coding	NA	NA	NA	NA	NA	NA
0.0014022765554444374	NC_044372.1	51488601	51489799	+	43.5757	1198	Intergenic	Intergenic	142216	LOC115710755	LOC115710755	XM_030639108	uncharacterized LOC115710755	protein_coding	NA	NA	NA	NA	NA	NA
0.0014022765554444374-2	NC_044375.1	38341601	38342799	+	43.5757	1198	Intergenic	Intergenic	43688	LOC115718644	LOC115718644	XM_030647466	uncharacterized LOC115718644	protein_coding	NA	NA	NA	NA	NA	NA
1.4778479745783603e-05	NC_044374.1	59401601	59404599	+	43.5757	2998	Intergenic	Intergenic	65783	LOC115718308	LOC115718308	XR_004011887	small nucleolar RNA R71	snoRNA	NA	NA	NA	NA	NA	NA
0.00013819507163628965	NC_044372.1	89839201	89841199	+	43.5665	1998	Intergenic	Intergenic	-7713	LOC115710073	LOC115710073	XM_030638394	uncharacterized LOC115710073,	protein_coding	0.192707935	1	1	0.127430686	1	1
1.422750100165175e-05	NC_044378.1	43140201	43142799	+	43.5619	2598	Intergenic	Intergenic	-39798	LOC115696846	LOC115696846	XM_030623731	peroxidase 19	protein_coding	3.7208042	3.19417E-17	1.62869E-15	0.737765572	1	1
0.0013480361632344493-3	NC_044377.1	21587601	21588799	+	43.5482	1198	intron	-intron (LOC115695042, intron 1 of 2)	9437	LOC115695042	LOC115695042	XM_030622140	homeobox protein 9	protein_coding	1.301977116	0.172257126	0.685853095	1.296808301	0.179840231	0.831225959
0.0013480361632344493-2	NC_044374.1	68481401	68482399	+	43.5482	998	Intergenic	Intergenic	11692	LOC115716131	LOC115716131	XM_030644862	nuclear transcription factor Y subunit C-3-like	protein_coding	0	1	NA	-2.293765801	0.744733572	NA
0.0001329746915607617	NC_044379.1	27205801	27208599	+	43.5482	2798	exon	-exon (LOC115699972, exon 4 of 4)	1599	LOC115699972	LOC115699972	XM_030627516	uncharacterized LOC115699972	protein_coding	NA	NA	NA	NA	NA	NA
0.0013480361632344493	NC_044371.1	22229201	22230399	+	43.5482	1198	Intergenic	Intergenic	-23312	LOC115703890	LOC115703890	XM_030631127	protein FAR1-RELATED SEQUENCE 5-like	protein_coding	NA	NA	NA	NA	NA	NA
0.00012795251692746643	NC_044375.1	44179801	44181399	+	43.5302	1598	Intergenic	Intergenic	-7296	LOC115720117	LOC115720117	XM_030649278	uncharacterized LOC115720117	protein_coding	NA	NA	NA	NA	NA	NA
1.3422191805426448e-06	NC_044373.1	6140601	6144599	+	43.5266	3998	Intergenic	Intergenic	-22087	LOC115712993	LOC115712993	XM_030641454	protein SIEVE ELEMENT OCCLUSION B	protein_coding	-4.081530859	6.06946E-07	8.90636E-06	-4.904898156	2.32699E-10	9.94036E-09
0.0001231209801462348	NC_044379.1	21673001	21674999	+	43.5124	1998	Intergenic	Intergenic	-64913	LOC115700995	LOC115700995	XR_004008478	uncharacterized LOC115700995	lncRNA	0	1	NA	-0.410947537	1	NA
0.00011847280427829835-2	NC_044375.1	66841201	66843799	+	43.4948	2598	Intergenic	Intergenic	-13026	LOC115721198	LOC115721198	XM_030650457	probable glycosyltransferase At5g20260	protein_coding	-1.647456388	0.158253394	0.641651471	0.372404776	1	1
0.00011847280427829835	NC_044372.1	90893201	90895599	+	43.4948	2398	Intergenic	Intergenic	15976	LOC115708998	LOC115708998	XM_030637018	beta-adaptin-like protein A	protein_coding	-0.205454407	1	1	-0.087409827	1	1
1.090621198127306e-05	NC_044379.1	24578801	24581199	+	43.4689	2398	Intergenic	Intergenic	48324	LOC115698927	LOC115698927	XR_004008257	uncharacterized LOC115698927	lncRNA	NA	NA	NA	NA	NA	NA
1.0499967237782414e-05	NC_044374.1	66269201	66272199	+	43.4561	2998	Intergenic	Intergenic	-22843	LOC115716951	LOC115716951	XM_030645879	ubiquitin-conjugating enzyme E2 22,	protein_coding	0.017787671	1	1	0.136379062	1	1
0.0011514479736094141	NC_044370.1	57902401	57903599	+	43.4435	1198	Intergenic	Intergenic	-7299	LOC115703289	LOC115703289	XR_004009065	small nucleolar RNA R71	snoRNA	NA	NA	NA	NA	NA	NA
1.0108898100377848e-05	NC_044370.1	88426001	88429199	+	43.4435	3198	Intergenic	Intergenic	9334	LOC115694885	LOC115694885	XM_030621991	uncharacterized LOC115694885	protein_coding	NA	NA	NA	NA	NA	NA
0.00010555979979252268	NC_044371.1	4265401	4267199	+	43.4435	1798	Intergenic	Intergenic	20137	LOC115706723	LOC115706723	XM_030634444	40S ribosomal protein S20-2	protein_coding	-0.425486257	1	1	0.422122194	1	1
9.564960701074137e-07	NC_044373.1	79884801	79886999	+	43.4334	2198	intron	-intron (LOC115713738, intron 1 of 6)	7213	LOC115713738	LOC115713738	XM_030642219	uncharacterized LOC115713738	protein_coding	NA	NA	NA	NA	NA	NA
9.211705685346664e-07	NC_044372.1	48831001	48834999	+	43.4235	3998	Intergenic	Intergenic	-21427	LOC115711230	LOC115711230	XM_030639558	embryonic protein DC-8	protein_coding	-0.374391986	1	1	-7.763530981	1.59179E-05	0.00030326
9.774661270255022e-05	NC_044370.1	76028001	76030799	+	43.4103	2798	Intergenic	Intergenic	-19550	LOC115714638	LOC115714638	XM_030643385	O-fucosyltransferase 31	protein_coding	-0.320753745	1	1	-0.17951977	1	1
0.001064284571365228	NC_044370.1	24122801	24124199	+	43.394	1398	Intergenic	Intergenic	12491	LOC115707769	LOC115707769	XM_030635829	KH domain-containing protein HEN4	protein_coding	0.179780353	1	1	0.208686941	1	1
0.001064284571365228-3	NC_044379.1	21816001	21817399	+	43.394	1398	Intergenic	Intergenic	26466	LOC115699185	LOC115699185	XM_030626465	uncharacterized LOC115699185,	protein_coding	0.135952402	1	1	0.401058787	1	1
0.001064284571365228-2	NC_044372.1	11506201	11507799	+	43.394	1598	Intergenic	Intergenic	-6517	LOC115710424	LOC115710424	XM_030638788	uncharacterized LOC115710424	protein_coding	-0.374376113	1	NA	0	1	NA
9.051446138433365e-05	NC_044379.1	5512601	5514599	+	43.3779	1998	Intergenic	Intergenic	-227480	LOC115701194	LOC115701194	XM_030628916	39S ribosomal protein L28, mitochondrial	protein_coding	-0.02710153	1	1	0.292764956	1	1
0.0010232336665237118-3	NC_044375.1	54189401	54190799	+	43.3699	1398	Intergenic	Intergenic	-169362	LOC115720200	LOC115720200	XM_030649356	uncharacterized LOC115720200	protein_coding	NA	NA	NA	NA	NA	NA
0.0010232336665237118-4	NC_044376.1	35057601	35059599	+	43.3699	1998	Intergenic	Intergenic	23693	LOC115723625	LOC115723625	XM_030653110	early light-induced protein 1, chloroplastic-like,	protein_coding	3.030473751	5.29358E-05	0.000564071	2.050465242	0.035551054	0.232132441
0.0010232336665237118-5	NC_044378.1	3101601	3103399	+	43.3699	1798	Intergenic	Intergenic	4259	TRNAQ-UUG_5	TRNAQ-UUG_5	TRNAQ-UUG_5	#N/A	tRNA	NA	NA	NA	NA	NA	NA
0.0010232336665237118	NC_044372.1	57188401	57190199	+	43.3699	1798	Intergenic	Intergenic	-38952	LOC115709028	LOC115709028	XM_030637061	transcription factor TCP5,	protein_coding	7.877656761	6.5105E-11	1.65763E-09	0.569633908	1	1
0.0010232336665237118-2	NC_044373.1	59875801	59877599	+	43.3699	1798	Intergenic	Intergenic	-42441	LOC115715202	LOC115715202	XM_030644044	auxin efflux carrier component 3,	protein_coding	1.727511212	0.031281457	0.165669109	1.290616308	0.389334714	1
8.381990962481639e-05	NC_044370.1	6436601	6437999	+	43.3463	1398	Intergenic	Intergenic	-4103	LOC115703172	LOC115703172	XM_030630690	uncharacterized LOC115703172,	protein_coding	-0.725711937	1	1	1.62435382	0.087197528	0.475517187
0.0009837815927067615	NC_044379.1	59493801	59495199	+	43.3463	1398	Intergenic	Intergenic	11587	LOC115700837	LOC115700837	XM_030628501	alkane hydroxylase MAH1	protein_coding	4.605468466	0.017554911	0.100944677	-2.867969939	0.052554301	0.317909457
7.185046472811946e-06	NC_044373.1	27711201	27715199	+	43.3346	3998	Intergenic	Intergenic	-28625	LOC115711953	LOC115711953	XM_030640151	cytochrome P450 71A1	protein_coding	0.643227477	1	1	-0.950357998	1	1
5.454968758412898e-08	NC_044377.1	9836601	9839999	+	43.3154	3398	Intergenic	Intergenic	-8435	LOC115694953	LOC115694953	XM_030622056	ascorbate transporter, chloroplastic	protein_coding	2.665060606	6.77731E-27	7.23779E-25	1.80421786	1.10975E-07	3.1698E-06
7.762278685993535e-05-2	NC_044376.1	43522201	43523999	+	43.3154	1798	Intergenic	Intergenic	-72430	LOC115722079	LOC115722079	XM_030651200	uncharacterized LOC115722079,	protein_coding	0.372140828	1	1	0.319122112	1	1
7.762278685993535e-05	NC_044372.1	78580201	78581999	+	43.3154	1798	Intergenic	Intergenic	19021	LOC115710238	LOC115710238	XM_030638587	serine/threonine-protein kinase Nek6,	protein_coding	-0.214151338	1	1	0.41191947	1	1
0.0009094245476461126	NC_044370.1	24378001	24379399	+	43.3003	1398	Intergenic	Intergenic	11169	LOC115703258	LOC115703258	XR_004009036	small nucleolar RNA R71	snoRNA	NA	NA	NA	NA	NA	NA
0.0009094245476461126-2	NC_044377.1	29907201	29908799	+	43.3003	1598	Intergenic	Intergenic	-2536	LOC115695081	LOC115695081	XM_030622176	uncharacterized mitochondrial protein AtMg00310-like	protein_coding	NA	NA	NA	NA	NA	NA
6.917928124620663e-05-2	NC_044373.1	21948001	21949799	+	43.2705	1798	Intergenic	Intergenic	-9768	LOC115714680	LOC115714680	XM_030643432	phosphoinositide phosphatase SAC1	protein_coding	-0.075666715	1	1	-0.038927398	1	1
6.917928124620663e-05	NC_044370.1	40077801	40079799	+	43.2705	1998	Intergenic	Intergenic	9961	LOC115710734	LOC115710734	XM_030639089	protein TRIGALACTOSYLDIACYLGLYCEROL 4, chloroplastic	protein_coding	1.237297877	0.369505727	1	0.652418183	1	1
6.657501129497673e-05	NC_044371.1	54502601	54504799	+	43.2559	2198	Intergenic	Intergenic	-407773	LOC115704145	LOC115704145	XM_030631362	uncharacterized LOC115704145	protein_coding	NA	NA	NA	NA	NA	NA
0.0008407391676750683	NC_044374.1	7920601	7921799	+	43.2559	1198	Intergenic	Intergenic	6296	LOC115715622	LOC115715622	XM_030644278	probable membrane-associated kinase regulator 5	protein_coding	0.311778552	1	1	1.39763223	0.146067375	0.70851707
0.0008407391676750683-2	NC_044377.1	2231601	2232799	+	43.2559	1198	exon	-exon (LOC115725527, exon 3 of 3)	882	LOC115725527	LOC115725527	XM_030655081	UDP-glycosyltransferase 90A1-like	protein_coding	1.109841343	0.73919361	1	1.907731461	0.006073717	0.053410364
0.0008407391676750683-3	NC_044377.1	9585201	9586399	+	43.2559	1198	Intergenic	Intergenic	8789	LOC115724588	LOC115724588	XM_030653906	auxin-responsive protein IAA20	protein_coding	5.301024976	2.97224E-11	7.91348E-10	1.007165076	0.99094517	1
0.0008407391676750683-4	NC_044378.1	31948401	31949999	+	43.2559	1598	Intergenic	Intergenic	-5736	LOC115697340	LOC115697340	XM_030624300	gamma-soluble NSF attachment protein	protein_coding	-0.500371642	1	1	0.39613862	1	1
6.406923761193044e-05	NC_044370.1	95311201	95313799	+	43.2414	2598	Intergenic	Intergenic	-31896	LOC115695597	LOC115695597	XM_030622654	uncharacterized LOC115695597	protein_coding	NA	NA	NA	NA	NA	NA
0.0008083853528338825	NC_044376.1	53239201	53240999	+	43.2342	1798	Intergenic	Intergenic	-473236	LOC115724380	LOC115724380	XR_004013173	small nucleolar RNA R71	snoRNA	NA	NA	NA	NA	NA	NA
0.0008083853528338825-2	NC_044377.1	4298801	4300199	+	43.2342	1398	Intergenic	Intergenic	14424	LOC115724465	LOC115724465	XM_030653756	protein GLUTAMINE DUMPER 3	protein_coding	-2.46984054	0.016627259	0.096476244	0.417347871	1	1
5.933834302293708e-05	NC_044378.1	51554801	51556199	+	43.213	1398	Intergenic	Intergenic	60190	LOC115698221	LOC115698221	XR_004008075	uncharacterized LOC115698221	lncRNA	1.549149048	0.892943704	NA	-0.911795263	1	NA
3.7363043099665376e-07	NC_044378.1	54055401	54058199	+	43.2046	2798	Intergenic	Intergenic	44896	LOC115697152	LOC115697152	XR_004007904	uncharacterized LOC115697152	lncRNA	NA	NA	NA	NA	NA	NA
5.710615660427334e-05	NC_044374.1	48626401	48627599	+	43.199	1198	Intergenic	Intergenic	2227	LOC115717808	LOC115717808	XM_030646780	uncharacterized LOC115717808	protein_coding	NA	NA	NA	NA	NA	NA
0.0007473984332627299	NC_044370.1	50749801	50751399	+	43.1921	1598	Intergenic	Intergenic	-12532	LOC115703302	LOC115703302	XR_004009077	small nucleolar RNA R71	snoRNA	NA	NA	NA	NA	NA	NA
0.0007473984332627299-2	NC_044375.1	56548601	56549999	+	43.1921	1398	Intergenic	Intergenic	-188424	LOC115720210	LOC115720210	XM_030649366	zinc finger BED domain-containing protein RICESLEEPER 2	protein_coding	-1.21204423	0.891210279	1	-0.787565129	1	1
0.0007473984332627299-3	NC_044377.1	29728801	29730399	+	43.1921	1598	Intergenic	Intergenic	23285	LOC115724533	LOC115724533	XM_030653831	65-kDa microtubule-associated protein 1	protein_coding	-1.048662497	0.700601904	1	-0.490257238	1	1
0.0007473984332627299-4	NC_044378.1	36066401	36067399	+	43.1921	998	Intergenic	Intergenic	-2560	LOC115696534	LOC115696534	XM_030623431	uncharacterized LOC115696534	protein_coding	NA	NA	NA	NA	NA	NA
0.0007473984332627299-5	NC_044379.1	12998601	13000199	+	43.1921	1598	Intergenic	Intergenic	-4414	LOC115699460	LOC115699460	XM_030626884	2-Cys peroxiredoxin BAS1, chloroplastic	protein_coding	1.233174604	0.252637753	0.922403709	0.774083968	1	1
5.289164286695273e-05	NC_044373.1	43467801	43469599	+	43.1715	1798	Intergenic	Intergenic	222707	LOC115713438	LOC115713438	XM_030641921	uncharacterized LOC115713438	protein_coding	-0.374376113	1	NA	0	1	NA
0.0007186685971336518-2	NC_044374.1	70807401	70809199	+	43.1715	1798	Intergenic	Intergenic	28140	LOC115717952	LOC115717952	XM_030646920	uncharacterized LOC115717952	protein_coding	NA	NA	NA	NA	NA	NA
0.0007186685971336518	NC_044371.1	58700401	58702399	+	43.1715	1998	promoter-TSS	-promoter-TSS (LOC115708404)	-1169	LOC115708404	LOC115708404	XR_004009906	small nucleolar RNA R71	snoRNA	NA	NA	NA	NA	NA	NA
3.919113249204984e-06	NC_044370.1	20807601	20810599	+	43.1614	2998	Intergenic	Intergenic	9179	LOC115717940	LOC115717940	XM_030646909	uncharacterized LOC115717940	protein_coding	NA	NA	NA	NA	NA	NA
5.0903029545666597e-05	NC_044376.1	13474001	13476599	+	43.158	2598	Intergenic	Intergenic	-49922	LOC115723246	LOC115723246	XR_004012929	uncharacterized LOC115723246	lncRNA	-0.090271313	1	1	0.263625039	1	1
0.0006910532132379181	NC_044372.1	60967801	60969199	+	43.1513	1398	Intergenic	Intergenic	44052	LOC115710826	LOC115710826	XM_030639177	uncharacterized LOC115710826	protein_coding	NA	NA	NA	NA	NA	NA
3.498477071607052e-06	NC_044377.1	44024201	44026999	+	43.1314	2798	Intergenic	Intergenic	-78432	LOC115695668	LOC115695668	XM_030622727	uncharacterized protein At1g66480	protein_coding	-3.167632037	5.83816E-07	8.59824E-06	0.071708717	1	1
0.0006645085866505737	NC_044371.1	24846001	24847599	+	43.1314	1598	Intergenic	Intergenic	-25752	LOC115705205	LOC115705205	XM_030632469	nuclear transport factor 2,	protein_coding	-0.576494739	1	1	0.465086811	1	1
4.537652082855822e-05	NC_044373.1	54854201	54855599	+	43.1184	1398	Intergenic	Intergenic	-12235	LOC115715204	LOC115715204	XM_030644048	uncharacterized LOC115715204	protein_coding	-0.229077965	1	1	0.036380051	1	1
4.537652082855822e-05-2	NC_044378.1	16802401	16804999	+	43.1184	2598	Intergenic	Intergenic	56447	LOC115698346	LOC115698346	XR_004008099	small nucleolar RNA R71	snoRNA	NA	NA	NA	NA	NA	NA
0.0006389927567507215	NC_044373.1	14725801	14727199	+	43.1119	1398	intron	-intron (LOC115713186, intron 1 of 2)	402	LOC115713186	LOC115713186	XM_030641670	uncharacterized LOC115713186	protein_coding	NA	NA	NA	NA	NA	NA
0.0006389927567507215-2	NC_044375.1	49057401	49058599	+	43.1119	1198	Intergenic	Intergenic	9208	LOC115720279	LOC115720279	XR_004012265	uncharacterized LOC115720279,	lncRNA	NA	NA	NA	NA	NA	NA
0.0006144654274657418	NC_044372.1	61947801	61949199	+	43.0927	1398	Intergenic	Intergenic	-5195	LOC115711785	LOC115711785	XR_004010660	small nucleolar RNA R71	snoRNA	NA	NA	NA	NA	NA	NA
3.0071656438564903e-06	NC_044375.1	82335201	82338799	+	43.0927	3598	promoter-TSS	-promoter-TSS (LOC115719740)	-1153	LOC115719740	LOC115719740	XM_030648915	cation/H(+) antiporter 15	protein_coding	0.882929995	1	1	0.956779869	1	1
4.2031117454872405e-05	NC_044377.1	42621201	42623199	+	43.0927	1998	Intergenic	Intergenic	-107463	LOC115694858	LOC115694858	XR_004007497	uncharacterized LOC115694858	lncRNA	NA	NA	NA	NA	NA	NA
0.0005908879003560259	NC_044376.1	53335001	53336999	+	43.0737	1998	Intergenic	Intergenic	-540713	LOC115724262	LOC115724262	XR_004013061	small nucleolar RNA R71	snoRNA	NA	NA	NA	NA	NA	NA
0.0005908879003560259-2	NC_044376.1	54030001	54031599	+	43.0737	1598	Intergenic	Intergenic	-153438	LOC115723914	LOC115723914	XM_030653374	uncharacterized LOC115723914	protein_coding	NA	NA	NA	NA	NA	NA
1.9007623548579898e-07	NC_044375.1	58904001	58906399	+	43.0625	2398	Intergenic	Intergenic	4340	LOC115721500	LOC115721500	XR_004012519	small nucleolar RNA R71	snoRNA	NA	NA	NA	NA	NA	NA
3.7471602484240646e-05-3	NC_044377.1	28622601	28624799	+	43.0551	2198	Intergenic	Intergenic	-107443	LOC115695076	LOC115695076	XM_030622170	uncharacterized LOC115695076	protein_coding	NA	NA	NA	NA	NA	NA
3.7471602484240646e-05	NC_044374.1	78764201	78766399	+	43.0551	2198	Intergenic	Intergenic	11792	LOC115716078	LOC115716078	XR_004011524	uncharacterized LOC115716078	lncRNA	NA	NA	NA	NA	NA	NA
3.7471602484240646e-05-2	NC_044375.1	33698401	33700599	+	43.0551	2198	Intergenic	Intergenic	-14421	LOC115720665	LOC115720665	XM_030649828	germin-like protein subfamily 1 member 17	protein_coding	NA	NA	NA	NA	NA	NA
2.4890990612621473e-06	NC_044373.1	73253601	73256399	+	43.0459	2798	Intergenic	Intergenic	-4676	LOC115712481	LOC115712481	XM_030640761	uncharacterized LOC115712481,	protein_coding	-0.223128187	1	1	-0.169206816	1	1
3.606493059527536e-05-2	NC_044376.1	53021801	53023599	+	43.0429	1798	Intergenic	Intergenic	-255836	LOC115724380	LOC115724380	XR_004013173	small nucleolar RNA R71	snoRNA	NA	NA	NA	NA	NA	NA
3.606493059527536e-05	NC_044371.1	86412601	86415599	+	43.0429	2998	Intergenic	Intergenic	-5322	LOC115706476	LOC115706476	XM_030634136	uncharacterized LOC115706476	protein_coding	-0.637902657	1	1	-1.103627668	0.733325485	1
0.0005464350645340235-2	NC_044378.1	50913801	50915799	+	43.0368	1998	Intergenic	Intergenic	-9959	LOC115697076	LOC115697076	XM_030623986	dof zinc finger protein DOF1.5	protein_coding	-0.932264424	1	1	-2.734802914	0.031653435	0.210836447
0.0005464350645340235	NC_044373.1	29871801	29873399	+	43.0368	1598	intron	-intron (LOC115713314, intron 1 of 2)	19510	LOC115713314	LOC115713314	XM_030641793	uncharacterized LOC115713314	protein_coding	NA	NA	NA	NA	NA	NA
3.47112912929892e-05	NC_044374.1	65925001	65927799	+	43.0308	2798	Intergenic	Intergenic	-25734	LOC115718305	LOC115718305	XR_004011885	small nucleolar RNA R71	snoRNA	NA	NA	NA	NA	NA	NA
0.0005254897823415755-2	NC_044376.1	32288001	32289399	+	43.0188	1398	Intergenic	Intergenic	23582	LOC115722874	LOC115722874	XM_030652221	magnesium transporter MRS2-2,	protein_coding	0.231086703	1	1	0.35994267	1	1
0.0005254897823415755	NC_044373.1	72580001	72581999	+	43.0188	1998	Intergenic	Intergenic	3532	TRNAS-GCU_2	TRNAS-GCU_2	TRNAS-GCU_2	#N/A	tRNA	NA	NA	NA	NA	NA	NA
3.215515060765779e-05	NC_044376.1	21780801	21782399	+	43.0069	1598	Intergenic	Intergenic	-26115	LOC115723662	LOC115723662	XM_030653144	uncharacterized LOC115723662	protein_coding	NA	NA	NA	NA	NA	NA
3.215515060765779e-05-2	NC_044377.1	29539601	29542799	+	43.0069	3198	Intergenic	Intergenic	64704	LOC115725629	LOC115725629	XM_030655210	uncharacterized LOC115725629	protein_coding	0.311938561	1	1	-0.023638741	1	1
3.0948857694365335e-05-2	NC_044371.1	51724201	51726399	+	42.9952	2198	Intergenic	Intergenic	139003	LOC115705418	LOC115705418	XR_004009460	uncharacterized LOC115705418	lncRNA	NA	NA	NA	NA	NA	NA
3.0948857694365335e-05	NC_044370.1	65720001	65722599	+	42.9952	2598	Intergenic	Intergenic	-10514	LOC115713365	LOC115713365	XM_030641846	pentatricopeptide repeat-containing protein At1g08070, chloroplastic	protein_coding	0.004856763	1	1	0.360857944	1	1
3.0948857694365335e-05-3	NC_044376.1	24083001	24085799	+	42.9952	2798	Intergenic	Intergenic	-7364	LOC115723261	LOC115723261	XM_030652702	phytosulfokine receptor 1	protein_coding	-1.265641644	0.447964442	1	-0.925514698	1	1
0.00046738713227853886	NC_044377.1	78099801	78101599	+	42.9663	1798	Intergenic	Intergenic	9976	LOC115694745	LOC115694745	XM_030621838	60S acidic ribosomal protein P2-2	protein_coding	-0.528152904	1	1	0.128513482	1	1
0.00044949602144995213-2	NC_044374.1	30616601	30617999	+	42.9494	1398	Intergenic	Intergenic	34897	LOC115717698	LOC115717698	XM_030646678	uncharacterized LOC115717698	protein_coding	NA	NA	NA	NA	NA	NA
0.00044949602144995213	NC_044371.1	90617201	90618999	+	42.9494	1798	TTS	-TTS (LOC115708360)	740	LOC115708360	LOC115708360	XR_004009860	small nucleolar RNA R71	snoRNA	NA	NA	NA	NA	NA	NA
1.5817155431096848e-06	NC_044372.1	52847401	52849399	+	42.941	1998	Intergenic	Intergenic	-7258	LOC115711674	LOC115711674	XM_030640047	transcription factor TCP2,	protein_coding	-1.767667879	0.261779883	0.948754657	-2.804119644	0.007971783	0.066771936
2.5565614201510652e-05	NC_044372.1	20006801	20009999	+	42.9382	3198	intron	-intron (LOC115711447, intron 1 of 1)	-5677	TRNAL-CAG_1	TRNAL-CAG_1	TRNAL-CAG_1	#N/A	tRNA	NA	NA	NA	NA	NA	NA
0.0004322954596257527	NC_044370.1	86405601	86407399	+	42.9327	1798	Intergenic	Intergenic	14731	LOC115725693	LOC115725693	XM_030655287	zinc finger BED domain-containing protein DAYSLEEPER-like	protein_coding	NA	NA	NA	NA	NA	NA
0.0004322954596257527-2	NC_044377.1	56323401	56325199	+	42.9327	1798	Intergenic	Intergenic	-51191	LOC115725671	LOC115725671	XM_030655255	uncharacterized LOC115725671	protein_coding	2.552045776	4.39592E-07	6.61728E-06	-0.522107876	1	1
2.4607454241871402e-05	NC_044378.1	4132401	4135199	+	42.9272	2798	Intergenic	Intergenic	-10135	LOC115698374	LOC115698374	XR_004008125	small nucleolar RNA R71	snoRNA	NA	NA	NA	NA	NA	NA
2.3685350508954947e-05	NC_044370.1	9021401	9024999	+	42.9163	3598	Intergenic	Intergenic	-2325	LOC115704956	LOC115704956	XM_030632203	GTP-binding protein SAR1A	protein_coding	-0.528115026	1	1	-0.14744633	1	1
0.0003998593791109073	NC_044370.1	39887801	39889599	+	42.9001	1798	Intergenic	Intergenic	-28148	LOC115710687	LOC115710687	XM_030639040	pentatricopeptide repeat-containing protein At1g62720	protein_coding	-1.67977996	0.065726579	0.312042983	-0.666070719	1	1
0.0003998593791109073-2	NC_044377.1	43166201	43167599	+	42.9001	1398	Intergenic	Intergenic	-106681	LOC115695201	LOC115695201	XM_030622286	uncharacterized LOC115695201	protein_coding	NA	NA	NA	NA	NA	NA
7.728332899014068e-08	NC_044377.1	2777001	2780799	+	42.8969	3798	exon	-exon (LOC115725250, exon 1 of 1)	529	LOC115725250	LOC115725250	XM_030654700	uncharacterized LOC115725250	protein_coding	NA	NA	NA	NA	NA	NA
2.194391119818717e-05	NC_044377.1	8419601	8420999	+	42.8947	1398	Intergenic	Intergenic	5983	LOC115724863	LOC115724863	XM_030654228	epoxide hydrolase A	protein_coding	0.637912817	1	1	-3.296406541	0.119867659	0.610065135
0.00038457316932018876-2	NC_044373.1	82769801	82770999	+	42.8841	1198	Intergenic	Intergenic	-2903	LOC115715201	LOC115715201	XM_030644036	histone-lysine N-methyltransferase, H3 lysine-9 specific SUVH6,	protein_coding	-0.41164168	1	1	-0.450521213	1	1
0.00038457316932018876	NC_044373.1	43961001	43962599	+	42.8841	1598	Intergenic	Intergenic	-214709	LOC115714342	LOC115714342	XM_030643016	crossover junction endonuclease EME1B,	protein_coding	-0.902046469	1	1	-0.176722662	1	1
1.0844321138850553e-06	NC_044378.1	45446201	45450799	+	42.8606	4598	promoter-TSS	-promoter-TSS (LOC115696594)	-1697	LOC115696594	LOC115696594	XM_030623487	protein UNUSUAL FLORAL ORGANS	protein_coding	-2.145257706	0.773507098	NA	0	1	NA
0.0003557450821979724-2	NC_044373.1	79486001	79487799	+	42.8529	1798	intron	-intron (LOC115712047, intron 3 of 4)	6628	LOC115712047	LOC115712047	XM_030640255	GDSL esterase/lipase EXL3	protein_coding	1.549195782	0.755393562	1	-6.587122498	2.20553E-05	0.000401485
0.0003557450821979724	NC_044370.1	14570601	14572799	+	42.8529	2198	Intergenic	Intergenic	-11042	LOC115703721	LOC115703721	XM_030630956	fatty-acid-binding protein 1	protein_coding	0.042834335	1	1	0.01977765	1	1
0.0003557450821979724-3	NC_044379.1	11756001	11758199	+	42.8529	2198	Intergenic	Intergenic	8980	LOC115700904	LOC115700904	XM_030628571	sorting nexin 1,	protein_coding	-0.123968435	1	1	0.064554829	1	1
0.00034215826917481445	NC_044370.1	26585201	26587399	+	42.8377	2198	intron	-intron (LOC115708359, intron 3 of 3)	-14289	LOC115708415	LOC115708415	XM_030636612	protein LIKE COV 2	protein_coding	-0.738632966	1	1	-1.086214692	0.523010116	1
0.00032909445298453426-2	NC_044379.1	14196401	14198399	+	42.8226	1998	Intergenic	Intergenic	-12591	LOC115699872	LOC115699872	XM_030627414	uncharacterized LOC115699872	protein_coding	NA	NA	NA	NA	NA	NA
0.00032909445298453426	NC_044371.1	46378601	46380599	+	42.8226	1998	Intergenic	Intergenic	27866	LOC115708368	LOC115708368	XR_004009868	small nucleolar RNA R71	snoRNA	NA	NA	NA	NA	NA	NA
0.00031653331372781697	NC_044378.1	55914801	55916999	+	42.8078	2198	Intergenic	Intergenic	-9894	LOC115698184	LOC115698184	XM_030625371	copper-transporting ATPase RAN1,	protein_coding	-1.558724294	0.002387018	0.017648326	-0.56817912	1	1
0.00031653331372781697-2	NW_022060321.1	26001	27599	+	42.8078	1598	NA	NA	NA	NA			#N/A		NA	NA	NA	NA	NA	NA
0.00030445532971065274	NC_044371.1	31666401	31667599	+	42.7932	1198	Intergenic	Intergenic	26236	LOC115704712	LOC115704712	XM_030631911	transcription factor MYB1R1-like	protein_coding	1.040474396	0.943798445	1	3.47131984	6.2295E-05	0.001020446
0.00030445532971065274-2	NC_044373.1	9049801	9051599	+	42.7932	1798	Intergenic	Intergenic	93792	LOC115712135	LOC115712135	XM_030640378	calmodulin-7	protein_coding	-1.237670968	0.453688337	1	-0.828619184	1	1
7.723150636267372e-07	NC_044379.1	23858201	23862199	+	42.7932	3998	Intergenic	Intergenic	71337	LOC115701358	LOC115701358	XM_030629134	NAC domain-containing protein 2	protein_coding	-0.02826433	1	1	-0.268952856	1	1
0.00029284174568723083	NC_044373.1	27179401	27181199	+	42.7788	1798	Intergenic	Intergenic	5278	LOC115713295	LOC115713295	XM_030641774	uncharacterized LOC115713295	protein_coding	NA	NA	NA	NA	NA	NA
1.2865929905111155e-05	NC_044375.1	57679201	57681999	+	42.7552	2798	Intergenic	Intergenic	-4476	LOC115720213	LOC115720213	XM_030649369	uncharacterized LOC115720213	protein_coding	NA	NA	NA	NA	NA	NA
8.289377024110318e-11	NC_044379.1	24096401	24099199	+	42.7525	2798	Intergenic	Intergenic	26230	LOC115699948	LOC115699948	XM_030627495	uncharacterized LOC115699948	protein_coding	0	1	NA	-1.294222407	0.941931806	NA
8.289377024110318e-11-2	NC_044379.1	24100001	24102399	+	42.7525	2398	Intergenic	Intergenic	29630	LOC115699948	LOC115699948	XM_030627495	uncharacterized LOC115699948	protein_coding	0	1	NA	-1.294222407	0.941931806	NA
3.0306553131872774e-08	NC_044376.1	53323201	53327999	+	42.7478	4798	Intergenic	Intergenic	-551113	LOC115724262	LOC115724262	XR_004013061	small nucleolar RNA R71	snoRNA	NA	NA	NA	NA	NA	NA
0.00026061070641052175	NC_044374.1	56499001	56500399	+	42.7367	1398	Intergenic	Intergenic	-59238	LOC115716452	LOC115716452	XM_030645253	xyloglucan galactosyltransferase XLT2-like	protein_coding	0.387685935	1	1	-0.464711161	1	1
1.1922193249486148e-05	NC_044373.1	55897201	55900799	+	42.7367	3598	Intergenic	Intergenic	12017	LOC115713516	LOC115713516	XM_030641997	egg cell-secreted protein 1.4-like	protein_coding	NA	NA	NA	NA	NA	NA
1.1922193249486148e-05-2	NC_044379.1	13654001	13655399	+	42.7367	1398	Intergenic	Intergenic	-25998	LOC115700456	LOC115700456	XM_030627994	uncharacterized LOC115700456	protein_coding	-0.845924763	1	1	-0.958496759	1	1
1.3573026517993747e-09	NC_044372.1	25304201	25308599	+	42.7322	4398	Intergenic	Intergenic	94056	LOC115709797	LOC115709797	XM_030638013	RNA-binding protein CP29B, chloroplastic	protein_coding	1.873341944	4.83793E-05	0.000521005	2.054080107	9.43643E-07	2.27885E-05
1.1476705635605075e-05	NC_044375.1	89090601	89093599	+	42.7276	2998	Intergenic	Intergenic	-2005	LOC115718818	LOC115718818	XM_030647635	shaggy-related protein kinase alpha	protein_coding	0.789874408	1	1	0.570099203	1	1
0.0002506814576834332	NC_044371.1	47165001	47166999	+	42.7231	1998	Intergenic	Intergenic	8707	LOC115707594	LOC115707594	XM_030635608	heat stress transcription factor A-7a	protein_coding	-4.816764922	0.001234627	0.009909376	-2.372538358	0.263879106	1
0.0002506814576834332-2	NC_044375.1	14366601	14369199	+	42.7231	2598	Intergenic	Intergenic	45627	LOC115719360	LOC115719360	XM_030648366	pentatricopeptide repeat-containing protein At3g18970,	protein_coding	-0.397752207	1	1	-0.241451532	1	1
5.10251247981273e-07	NC_044374.1	29526401	29530199	+	42.7163	3798	Intergenic	Intergenic	11735	LOC115715928	LOC115715928	XM_030644611	transcription factor bHLH36	protein_coding	-0.374376113	1	NA	0	1	NA
1.0237990511089594e-05	NC_044370.1	27812001	27814399	+	42.7008	2398	Intergenic	Intergenic	17257	LOC115719342	LOC115719342	XM_030648336	uncharacterized LOC115719342	protein_coding	NA	NA	NA	NA	NA	NA
0.00023195149244095912	NC_044377.1	20710801	20712399	+	42.6964	1598	Intergenic	Intergenic	-24075	LOC115695038	LOC115695038	XM_030622136	myosin tail region-interacting protein MTI1-like	protein_coding	NA	NA	NA	NA	NA	NA
0.00021463073186848224	NC_044375.1	35587601	35588799	+	42.6704	1198	Intergenic	Intergenic	-21231	LOC115721457	LOC115721457	XR_004012479	small nucleolar RNA R71	snoRNA	NA	NA	NA	NA	NA	NA
0.00020646506882961803	NC_044378.1	31852801	31855399	+	42.6576	2598	Intergenic	Intergenic	19450	LOC115696978	LOC115696978	XM_030623873	beta-amyrin 28-monooxygenase-like	protein_coding	2.987054124	0.000119126	0.001182833	0.325903346	1	1
0.00019861227376487454	NC_044378.1	59825201	59827399	+	42.6451	2198	Intergenic	Intergenic	-5417	LOC115697947	LOC115697947	XR_004008009	uncharacterized LOC115697947	lncRNA	-1.176767279	0.864968878	1	-1.817995444	0.421973915	1
0.00019106025804261167	NC_044370.1	50870601	50872599	+	42.6327	1998	Intergenic	Intergenic	-13907	LOC115721423	LOC115721423	XM_030650720	uncharacterized LOC115721423	protein_coding	NA	NA	NA	NA	NA	NA
0.00019106025804261167-2	NC_044375.1	14262401	14264199	+	42.6327	1798	Intergenic	Intergenic	-50906	LOC115719877	LOC115719877	XM_030649056	NADH dehydrogenase [ubiquinone] 1 alpha subcomplex subunit 8-B-like	protein_coding	-0.179000536	1	1	0.000532555	1	1
3.0124122478650853e-07	NC_044376.1	29547001	29550599	+	42.6265	3598	Intergenic	Intergenic	-12435	LOC115723150	LOC115723150	XM_030652585	probable prefoldin subunit 5	protein_coding	0.064301503	1	1	0.433939059	1	1
1.2352683461747699e-08	NC_044373.1	20682601	20688599	+	42.6229	5998	Intergenic	Intergenic	12853	LOC115712291	LOC115712291	XM_030640553	uncharacterized LOC115712291	protein_coding	5.299057342	5.91362E-14	2.10514E-12	1.48923161	0.244948879	1
0.00018379740479195	NC_044376.1	16046801	16048399	+	42.6204	1598	Intergenic	Intergenic	8904	LOC115723612	LOC115723612	XM_030653097	uncharacterized LOC115723612	protein_coding	0	1	NA	-1.894926023	0.82273136	NA
6.998790440347321e-06	NC_044372.1	53347001	53350799	+	42.6164	3798	Intergenic	Intergenic	40905	LOC115711851	LOC115711851	XR_004010719	small nucleolar RNA R71	snoRNA	NA	NA	NA	NA	NA	NA
0.00017681255027466404	NC_044375.1	65754401	65755999	+	42.6083	1598	Intergenic	Intergenic	35600	LOC115718535	LOC115718535	XM_030647336	transcription factor MYB46	protein_coding	-2.59450947	0.067876965	0.320038974	-4.109593336	0.000262215	0.003673873
0.00017009496600271288	NC_044377.1	4408001	4410599	+	42.5964	2598	Intergenic	Intergenic	10326	LOC115725470	LOC115725470	XM_030655003	protein SUPPRESSOR OF MAX2 1	protein_coding	0.870163462	1	1	-0.078994699	1	1
0.0001636343415710739	NC_044371.1	22565001	22566999	+	42.5846	1998	exon	-exon (LOC115703897, exon 2 of 4)	2173	LOC115703897	LOC115703897	XM_030631134	uncharacterized LOC115703897	protein_coding	1.549169232	0.892939793	NA	1.512629836	0.90002605	NA
6.011859730807142e-06	NC_044373.1	24859801	24863999	+	42.5846	4198	Intergenic	Intergenic	-27010	LOC115715175	LOC115715175	XM_030644006	aspartic proteinase nepenthesin-1	protein_coding	-1.364768517	0.68080879	1	-2.612085866	0.065456253	0.378539579
0.00015144472279683116-2	NC_044373.1	75887601	75889999	+	42.5615	2398	Intergenic	Intergenic	-15964	LOC115715166	LOC115715166	XM_030643987	uncharacterized protein At2g29880-like	protein_coding	NA	NA	NA	NA	NA	NA
0.00015144472279683116	NC_044370.1	46145601	46147599	+	42.5615	1998	Intergenic	Intergenic	9481	LOC115711365	LOC115711365	XM_030639703	importin-4	protein_coding	-0.64236308	1	1	0.175896135	1	1
5.364397216159804e-06	NC_044374.1	24261601	24264399	+	42.5615	2798	Intergenic	Intergenic	3716	LOC115718251	LOC115718251	XR_004011832	small nucleolar RNA R71	snoRNA	NA	NA	NA	NA	NA	NA
0.00014569705299668362	NC_044374.1	15618601	15620799	+	42.5502	2198	Intergenic	Intergenic	-25672	LOC115717313	LOC115717313	XR_004011731	uncharacterized LOC115717313	lncRNA	NA	NA	NA	NA	NA	NA
4.9720972660885025e-06	NC_044377.1	27172601	27176599	+	42.5464	3998	Intergenic	Intergenic	-111909	LOC115696021	LOC115696021	XR_004007622	small nucleolar RNA R71	snoRNA	NA	NA	NA	NA	NA	NA
1.7794804934573295e-07	NC_044377.1	44041001	44045199	+	42.5445	4198	Intergenic	Intergenic	-60932	LOC115695668	LOC115695668	XM_030622727	uncharacterized protein At1g66480	protein_coding	-3.167632037	5.83816E-07	8.59824E-06	0.071708717	1	1
4.786875277064003e-06	NC_044373.1	82762401	82765799	+	42.539	3398	Intergenic	Intergenic	-9203	LOC115715201	LOC115715201	XM_030644036	histone-lysine N-methyltransferase, H3 lysine-9 specific SUVH6,	protein_coding	-0.41164168	1	1	-0.450521213	1	1
3.6702642826750104e-06	NW_022060381.1	3801	6799	+	42.4885	2998	Intergenic	Intergenic	3329	LOC115702035	LOC115702035	XR_004008780	#N/A	rRNA	NA	NA	NA	NA	NA	NA
0.00011553752327617628	NC_044377.1	14185001	14187999	+	42.485	2998	Intergenic	Intergenic	10738	LOC115725521	LOC115725521	XM_030655073	probable mannitol dehydrogenase	protein_coding	1.730804441	0.144331703	0.595521617	2.464500601	0.003471754	0.033186237
3.4021781425799286e-06	NC_044374.1	55965601	55968399	+	42.4746	2798	Intergenic	Intergenic	-30395	LOC115716233	LOC115716233	XM_030644985	probable mediator of RNA polymerase II transcription subunit 37e	protein_coding	0.443060218	1	1	1.225766947	0.40300161	1
9.756586835310806e-08	NC_044373.1	84516201	84520199	+	42.4592	3998	intron	-intron (LOC115714484, intron 1 of 2)	1341	LOC115714484	LOC115714484	XR_004011061	uncharacterized LOC115714484,	lncRNA	NA	NA	NA	NA	NA	NA
0.00010290040412091892	NC_044374.1	58036201	58037599	+	42.4541	1398	Intergenic	Intergenic	-4320	LOC115717869	LOC115717869	XM_030646840	pirin-like protein At1g50590	protein_coding	0	1	NA	-1.183474883	0.963862251	NA
8.717535554023568e-08	NC_044376.1	24056001	24060799	+	42.4441	4798	Intergenic	Intergenic	-18095	LOC115723693	LOC115723693	XM_030653175	uncharacterized LOC115723693	protein_coding	NA	NA	NA	NA	NA	NA
9.525780443185174e-05	NC_044372.1	22920601	22922799	+	42.4341	2198	Intergenic	Intergenic	-16674	LOC115708893	LOC115708893	XR_004010102	uncharacterized LOC115708893	lncRNA	0.126112588	1	1	0.092428448	1	1
8.818615020122778e-05	NC_044377.1	44010401	44011999	+	42.4146	1598	Intergenic	Intergenic	-92832	LOC115695668	LOC115695668	XM_030622727	uncharacterized protein At1g66480	protein_coding	-3.167632037	5.83816E-07	8.59824E-06	0.071708717	1	1
8.818615020122778e-05-2	NC_044379.1	1845401	1847599	+	42.4146	2198	Intergenic	Intergenic	-943289	LOC115698919	LOC115698919	XM_030626122	extracellular ribonuclease LE	protein_coding	-2.667802986	0.007814691	0.050323215	-6.151631711	1.46512E-17	1.49016E-15
8.485087661665652e-05-2	NC_044376.1	44559601	44561599	+	42.405	1998	Intergenic	Intergenic	-116402	LOC115723852	LOC115723852	XM_030653317	uncharacterized LOC115723852	protein_coding	NA	NA	NA	NA	NA	NA
8.485087661665652e-05	NC_044370.1	96533201	96535599	+	42.405	2398	promoter-TSS	-promoter-TSS (LOC115695822)	-309	LOC115695822	LOC115695822	XM_030622908	uncharacterized LOC115695822	protein_coding	NA	NA	NA	NA	NA	NA
7.855614359860001e-05	NC_044375.1	57211401	57213799	+	42.3862	2398	Intergenic	Intergenic	7528	LOC115720212	LOC115720212	XM_030649368	uncharacterized LOC115720212	protein_coding	-1.273177011	0.92651714	NA	1.512635152	0.868742703	NA
7.558714886885638e-05	NC_044377.1	22798801	22801399	+	42.3769	2598	Intergenic	Intergenic	-90140	LOC115725021	LOC115725021	XM_030654421	protein translation factor SUI1 homolog	protein_coding	-0.414930031	1	1	0.760235712	1	1
1.7868014066627112e-06	NC_044374.1	17404801	17409199	+	42.3648	4398	Intergenic	Intergenic	-57395	LOC115717099	LOC115717099	XM_030646043	RGS1-HXK1-interacting protein 1	protein_coding	-0.316268155	1	1	-0.016236147	1	1
3.28822069641848e-08	NC_044375.1	45238001	45243799	+	42.3235	5798	Intergenic	Intergenic	-9030	LOC115718712	LOC115718712	XM_030647534	coleoptile phototropism protein 1	protein_coding	2.71015822	0.324862481	1	4.023212765	0.113243074	0.583455272
5.346008924658989e-05	NC_044373.1	45281201	45283399	+	42.2981	2198	Intergenic	Intergenic	11258	LOC115714146	LOC115714146	XM_030642712	small GTPase LIP1	protein_coding	-0.075841581	1	1	0.425921278	1	1
5.346008924658989e-05-2	NC_044375.1	64798801	64802199	+	42.2981	3398	intron	-intron (LOC115718903, intron 1 of 1)	5971	LOC115718903	LOC115718903	XM_030647713	uncharacterized LOC115718903	protein_coding	1.549169232	0.892939793	NA	1.512629836	0.90002605	NA
5.346008924658989e-05-3	NC_044375.1	71574401	71577399	+	42.2981	2998	Intergenic	Intergenic	-3238	LOC115720324	LOC115720324	XM_030649477	F-box protein At3g08750-like	protein_coding	NA	NA	NA	NA	NA	NA
1.134937816337305e-06	NC_044378.1	67189201	67192999	+	42.2953	3798	intron	-intron (LOC115696766, intron 1 of 1)	5847	LOC115696766	LOC115696766	XM_030623650	polyadenylate-binding protein 8-like	protein_coding	-0.37438412	1	NA	-0.410947537	1	NA
5.144403726376829e-05	NW_022060454.1	1430401	1432599	+	42.2898	2198	Intergenic	Intergenic	-70692	LOC115702125	LOC115702125	XM_030629583	#N/A	protein_coding	0.642329408	1	1	-2.642988593	0.003486277	0.033308503
4.950442330063017e-05	NC_044378.1	24809401	24811199	+	42.2816	1798	Intergenic	Intergenic	121689	LOC115698279	LOC115698279	XM_030625490	uncharacterized LOC115698279	protein_coding	NA	NA	NA	NA	NA	NA
4.7638330830256975e-05	NC_044370.1	26813001	26815599	+	42.2734	2598	intron	-intron (LOC115708359, intron 3 of 3)	-28859	LOC115703325	LOC115703325	XR_004009100	small nucleolar RNA R71	snoRNA	NA	NA	NA	NA	NA	NA
0.0022067114916041286	NC_044372.1	22617401	22618599	+	42.2114	1198	Intergenic	Intergenic	-31504	LOC115711321	LOC115711321	XR_004010457	uncharacterized LOC115711321	lncRNA	NA	NA	NA	NA	NA	NA
0.0022067114916041286-2	NC_044372.1	73852601	73853599	+	42.2114	998	Intergenic	Intergenic	-47984	LOC115708799	LOC115708799	XR_004010078	uncharacterized LOC115708799	lncRNA	1.28120272	0.841692064	1	-3.202666113	0.055255268	0.330585749
0.0022067114916041286-3	NC_044377.1	56218001	56218999	+	42.2114	998	Intergenic	Intergenic	-28670	LOC115695285	LOC115695285	XM_030622360	uncharacterized LOC115695285	protein_coding	NA	NA	NA	NA	NA	NA
0.0021202558770318735-3	NC_044373.1	36777001	36778399	+	42.1967	1398	Intergenic	Intergenic	-3654	LOC115715316	LOC115715316	XM_030644171	fibrillin-5, chloroplastic,	protein_coding	2.462005743	7.88128E-12	2.21494E-10	1.25432031	0.227971391	0.990145566
0.0021202558770318735-4	NC_044379.1	24140401	24141799	+	42.1967	1398	Intergenic	Intergenic	27741	LOC115700873	LOC115700873	XM_030628536	phosphate transporter PHO1 homolog 3	protein_coding	-6.012709475	2.52366E-23	2.02135E-21	-6.708023062	8.43511E-30	2.19119E-27
0.0021202558770318735-2	NC_044372.1	71088401	71089599	+	42.1967	1198	Intergenic	Intergenic	-18789	LOC115708820	LOC115708820	XM_030636836	cytochrome P450 94C1	protein_coding	-2.893215621	0.1710765	0.682566117	4.011863347	0.095784101	0.51103463
0.0021202558770318735	NC_044370.1	50607801	50608999	+	42.1967	1198	Intergenic	Intergenic	15526	LOC115702478	LOC115702478	XM_030629921	uncharacterized LOC115702478	protein_coding	0	1	1	-5.834025369	0.00782842	0.065771732
3.123361897198972e-05	NC_044378.1	33935801	33938399	+	42.1895	2598	Intergenic	Intergenic	10488	LOC115698432	LOC115698432	XR_004008179	small nucleolar RNA R71	snoRNA	NA	NA	NA	NA	NA	NA
0.00203723912026597	NC_044374.1	4575401	4576399	+	42.1823	998	Intergenic	Intergenic	-6104	LOC115716196	LOC115716196	XM_030644935	probable protein phosphatase 2C 76,	protein_coding	-0.284434123	1	1	0.00129912	1	1
0.00203723912026597-2	NC_044379.1	45616801	45617999	+	42.1823	1198	Intergenic	Intergenic	257495	LOC115700161	LOC115700161	XM_030627721	uncharacterized LOC115700161	protein_coding	NA	NA	NA	NA	NA	NA
0.001957521776460908	NC_044371.1	6872601	6873999	+	42.1681	1398	Intergenic	Intergenic	-2668	LOC115704897	LOC115704897	XM_030632110	pentatricopeptide repeat-containing protein At5g25630-like,	protein_coding	2.816713203	2.23882E-10	5.33295E-09	1.873128982	0.002205768	0.02274264
0.001807456274698067-2	NC_044376.1	34812001	34813599	+	42.1407	1598	Intergenic	Intergenic	-19151	LOC115723791	LOC115723791	XM_030653262	uncharacterized LOC115723791	protein_coding	NA	NA	NA	NA	NA	NA
0.001807456274698067	NC_044374.1	55916801	55918199	+	42.1407	1398	Intergenic	Intergenic	19105	LOC115716233	LOC115716233	XM_030644985	probable mediator of RNA polymerase II transcription subunit 37e	protein_coding	0.443060218	1	1	1.225766947	0.40300161	1
2.2989949415165612e-05	NC_044374.1	23128601	23131799	+	42.134	3198	Intergenic	Intergenic	45443	LOC115717655	LOC115717655	XM_030646637	uncharacterized LOC115717655	protein_coding	NA	NA	NA	NA	NA	NA
0.0017368572192896445-2	NC_044373.1	45057201	45058399	+	42.1273	1198	Intergenic	Intergenic	8522	LOC115715246	LOC115715246	XM_030644086	iron-sulfur assembly protein IscA, chloroplastic	protein_coding	2.053591871	2.34389E-13	7.91856E-12	1.348152553	0.014791973	0.111595797
0.0017368572192896445	NC_044372.1	83834801	83836199	+	42.1273	1398	Intergenic	Intergenic	-66212	LOC115711031	LOC115711031	XM_030639371	uncharacterized LOC115711031	protein_coding	-0.374376113	1	NA	0	1	NA
0.0017368572192896445-3	NC_044374.1	79223001	79223999	+	42.1273	998	Intergenic	Intergenic	12962	LOC115717204	LOC115717204	XM_030646166	uncharacterized LOC115717204,	protein_coding	4.489623564	0.285917748	1	3.491305956	0.446163096	1
2.1296004520810346e-05-2	NW_022060514.1	44801	46999	+	42.1208	2198	NA	NA	NA	NA			#N/A		NA	NA	NA	NA	NA	NA
2.1296004520810346e-05	NC_044378.1	57763001	57766199	+	42.1208	3198	Intergenic	Intergenic	-48320	LOC115697261	LOC115697261	XM_030624193	nucleolar MIF4G domain-containing protein 1,	protein_coding	0.751494971	1	1	0.965610043	1	1
2.0496643252445174e-05	NC_044377.1	13377001	13380199	+	42.1143	3198	Intergenic	Intergenic	33426	LOC115694720	LOC115694720	XR_004007450	uncharacterized LOC115694720	lncRNA	NA	NA	NA	NA	NA	NA
0.0016690553178227265	NC_044375.1	40386201	40387999	+	42.1143	1798	Intergenic	Intergenic	8611	LOC115718449	LOC115718449	XM_030647232	heat stress transcription factor B-4d	protein_coding	-6.655778964	0.000512205	0.00451864	-2.933776522	0.261186514	1
0.0016039377243347046-3	NW_022060487.1	534801	535999	+	42.1014	1198	NA	NA	NA	NA			#N/A		NA	NA	NA	NA	NA	NA
0.0016039377243347046	NC_044370.1	43352401	43353799	+	42.1014	1398	Intergenic	Intergenic	38689	LOC115701454	LOC115701454	XR_004008556	uncharacterized LOC115701454,	lncRNA	NA	NA	NA	NA	NA	NA
0.0016039377243347046-2	NC_044374.1	45109801	45111199	+	42.1014	1398	Intergenic	Intergenic	-23158	LOC115717333	LOC115717333	XR_004011733	uncharacterized LOC115717333	lncRNA	NA	NA	NA	NA	NA	NA
0.0015413962514255776-3	NC_044377.1	21319201	21320999	+	42.0888	1798	Intergenic	Intergenic	-27930	LOC115725506	LOC115725506	XM_030655054	alpha-humulene synthase	protein_coding	-1.237136109	0.748078152	1	-9.835206646	9.08154E-40	4.05987E-37
1.7589400968618758e-05	NC_044375.1	24593801	24596599	+	42.0888	2798	Intergenic	Intergenic	-2785	LOC115721576	LOC115721576	XR_004012591	small nucleolar RNA R71	snoRNA	NA	NA	NA	NA	NA	NA
0.0015413962514255776-2	NC_044374.1	61950001	61951199	+	42.0888	1198	Intergenic	Intergenic	-70782	LOC115717886	LOC115717886	XM_030646856	uncharacterized mitochondrial protein AtMg00310-like	protein_coding	-1.191161672	0.962318612	NA	0	1	NA
0.0015413962514255776	NC_044370.1	23479201	23480399	+	42.0888	1198	Intergenic	Intergenic	-19210	LOC115718766	LOC115718766	XM_030647601	glutamate receptor 2.8-like	protein_coding	NA	NA	NA	NA	NA	NA
0.001481327172258839	NC_044372.1	9007201	9008599	+	42.0764	1398	Intergenic	Intergenic	-89283	LOC115709949	LOC115709949	XM_030638219	CASP-like protein 4A3	protein_coding	-0.613225913	1	1	-0.670415842	1	1
0.001481327172258839-2	NC_044378.1	21359401	21360999	+	42.0764	1598	Intergenic	Intergenic	32471	LOC115698379	LOC115698379	XR_004008130	small nucleolar RNA R71	snoRNA	NA	NA	NA	NA	NA	NA
1.5684043635728753e-05-2	NC_044378.1	49341601	49344599	+	42.0703	2998	exon	-exon (LOC115696626, exon 4 of 5)	1293	LOC115696626	LOC115696626	XM_030623520	uncharacterized LOC115696626	protein_coding	NA	NA	NA	NA	NA	NA
1.5684043635728753e-05	NC_044375.1	30629401	30632399	+	42.0703	2998	promoter-TSS	-promoter-TSS (LOC115720026)	-498	LOC115720026	LOC115720026	XM_030649192	uncharacterized LOC115720026	protein_coding	NA	NA	NA	NA	NA	NA
0.001423631031286591	NC_044377.1	55742601	55744399	+	42.0643	1798	Intergenic	Intergenic	-29120	LOC115694860	LOC115694860	XM_030621961	protein OSB4, chloroplastic,	protein_coding	-0.027866869	1	1	0.465193515	1	1
0.001368212463297886	NC_044371.1	50031401	50032999	+	42.0524	1598	Intergenic	Intergenic	4165	LOC115704825	LOC115704825	XM_030632031	IAA-amino acid hydrolase ILR1-like 4	protein_coding	-3.014347261	0.000427504	0.003832981	-0.233957483	1	1
1.5976996544910747e-07	NC_044371.1	10207401	10211399	+	42.0524	3998	Intergenic	Intergenic	14764	LOC115704004	LOC115704004	XM_030631227	putative UPF0481 protein At3g02645	protein_coding	-1.328754267	0.935044317	NA	0	1	NA
0.001368212463297886-2	NC_044374.1	60284001	60285599	+	42.0524	1598	Intergenic	Intergenic	-171355	LOC115717877	LOC115717877	XM_030646848	uncharacterized LOC115717877	protein_coding	NA	NA	NA	NA	NA	NA
0.0013149800204082193	NC_044372.1	11386001	11387399	+	42.0407	1398	Intergenic	Intergenic	-13200	LOC115709301	LOC115709301	XM_030637374	ABC transporter A family member 2	protein_coding	-0.082839117	1	1	-0.263021683	1	1
0.0013149800204082193-2	NC_044373.1	30705601	30706999	+	42.0407	1398	Intergenic	Intergenic	42537	LOC115712854	LOC115712854	XM_030641254	uncharacterized LOC115712854	protein_coding	0.856743416	1	1	0.780744789	1	1
0.0013149800204082193-3	NC_044379.1	42270201	42271199	+	42.0407	998	Intergenic	Intergenic	3092	LOC115698813	LOC115698813	XM_030626001	uncharacterized LOC115698813	protein_coding	1.368933742	0.632752007	1	-0.052655063	1	1
0.0012638460066270256	NC_044375.1	80217201	80218999	+	42.0292	1798	Intergenic	Intergenic	-18245	LOC115718547	LOC115718547	XM_030647347	telomere repeat-binding protein 5,	protein_coding	0.180546658	1	1	-0.040080582	1	1
1.200531573169326e-05	NC_044375.1	22843001	22844999	+	42.0292	1998	Intergenic	Intergenic	-5207	TRNAG-GCC_7	TRNAG-GCC_7	TRNAG-GCC_7	#N/A	tRNA	NA	NA	NA	NA	NA	NA
0.0012638460066270256-2	NC_044377.1	42895601	42896999	+	42.0292	1398	Intergenic	Intergenic	-7327	LOC115695200	LOC115695200	XM_030622285	uncharacterized LOC115695200	protein_coding	NA	NA	NA	NA	NA	NA
1.1555830056704864e-05	NC_044379.1	4767801	4771199	+	42.0235	3398	Intergenic	Intergenic	-10973	LOC115699364	LOC115699364	XM_030626724	4-coumarate--CoA ligase 1	protein_coding	0.316629754	1	1	-0.873538761	1	1
0.001214726319656809	NC_044371.1	81386001	81387599	+	42.0179	1598	Intergenic	Intergenic	46223	LOC115705982	LOC115705982	XM_030633470	stemmadenine O-acetyltransferase	protein_coding	0.530425683	1	1	-4.18431025	1.3013E-14	9.29921E-13
0.001214726319656809-3	NC_044373.1	55836001	55837799	+	42.0179	1798	Intergenic	Intergenic	11128	LOC115712921	LOC115712921	XM_030641339	cellulose synthase A catalytic subunit 6 [UDP-forming]	protein_coding	0.515932145	1	1	0.133379852	1	1
0.001214726319656809-5	NC_044378.1	41595201	41596799	+	42.0179	1598	Intergenic	Intergenic	27701	LOC115696577	LOC115696577	XM_030623470	uncharacterized LOC115696577	protein_coding	0	1	NA	-0.410947537	1	NA
0.001214726319656809-4	NC_044377.1	47972401	47973599	+	42.0179	1198	Intergenic	Intergenic	-19336	LOC115696083	LOC115696083	XR_004007681	small nucleolar RNA R71	snoRNA	NA	NA	NA	NA	NA	NA
0.001214726319656809-2	NC_044373.1	47537401	47538799	+	42.0179	1398	Intergenic	Intergenic	-17355	LOC115714867	LOC115714867	XM_030643630	mulatexin-like	protein_coding	-3.089691166	0.0289923	0.155573407	-9.361968343	2.14142E-19	2.58897E-17
0.0011675402995946099-2	NC_044378.1	22592801	22594199	+	42.0068	1398	Intergenic	Intergenic	2925	LOC115696430	LOC115696430	XM_030623332	uncharacterized LOC115696430	protein_coding	NA	NA	NA	NA	NA	NA
0.0011675402995946099	NC_044372.1	70542401	70543999	+	42.0068	1598	Intergenic	Intergenic	-5807	LOC115708762	LOC115708762	XM_030636775	putative phytosulfokines 6	protein_coding	-2.538725115	1.30812E-05	0.00015638	1.207604008	0.564340365	1
0.0011222105842219228-2	NC_044377.1	40938801	40940399	+	41.9959	1598	Intergenic	Intergenic	-23792	LOC115725313	LOC115725313	XR_004013366	uncharacterized LOC115725313	lncRNA	NA	NA	NA	NA	NA	NA
0.0011222105842219228	NC_044372.1	17329801	17331799	+	41.9959	1998	Intergenic	Intergenic	43831	LOC115708734	LOC115708734	XM_030636736	transcription factor MYB122	protein_coding	-0.51092925	1	1	-2.087672957	0.114286824	0.587573044
0.0010786629705842679	NC_044375.1	73428201	73429799	+	41.9851	1598	Intergenic	Intergenic	14837	LOC115718403	LOC115718403	XM_030647174	metal tolerance protein B	protein_coding	-0.564136393	1	1	0.439125007	1	1
8.517605759879052e-06	NC_044377.1	8339001	8341999	+	41.9798	2998	intron	-intron (LOC115724832, intron 3 of 6)	5345	LOC115724832	LOC115724832	XM_030654187	receptor-like serine/threonine-protein kinase SD1-8,	protein_coding	-1.669742822	5.74162E-05	0.000608776	-1.524287947	0.001655084	0.01780396
0.0009580153586506884-4	NC_044377.1	41166401	41167999	+	41.954	1598	Intergenic	Intergenic	66197	LOC115724718	LOC115724718	XR_004013262	uncharacterized LOC115724718	lncRNA	NA	NA	NA	NA	NA	NA
0.0009580153586506884-3	NC_044374.1	34848001	34849399	+	41.954	1398	Intergenic	Intergenic	-138164	LOC115717435	LOC115717435	XM_030646422	uncharacterized LOC115717435	protein_coding	0.162737964	1	1	0.183229092	1	1
0.0009580153586506884	NC_044370.1	47002401	47003999	+	41.954	1598	Intergenic	Intergenic	-91888	LOC115720976	LOC115720976	XM_030650204	uncharacterized LOC115720976	protein_coding	NA	NA	NA	NA	NA	NA
0.0009580153586506884-2	NC_044371.1	53508001	53509999	+	41.954	1998	Intergenic	Intergenic	-67020	LOC115704902	LOC115704902	XM_030632114	1-acyl-sn-glycerol-3-phosphate acyltransferase 3,	protein_coding	-1.984150838	0.145230392	0.598131049	-2.331698908	0.047288362	0.292009052
6.52423068208942e-06	NC_044374.1	85418601	85421399	+	41.944	2798	Intergenic	Intergenic	-157296	LOC115716182	LOC115716182	XM_030644921	uncharacterized LOC115716182	protein_coding	-2.148277376	0.003082854	0.022120827	-2.012420156	0.009106107	0.074678623
6.046015130974102e-06	NC_044378.1	33914001	33916999	+	41.9342	2998	Intergenic	Intergenic	-2213	LOC115698393	LOC115698393	XR_004008142	small nucleolar RNA R71	snoRNA	NA	NA	NA	NA	NA	NA
0.0008852642615989616	NC_044378.1	68434601	68436799	+	41.9342	2198	TTS	-TTS (LOC115696792)	1099	LOC115696792	LOC115696792	XM_030623675	NAC domain-containing protein 41-like	protein_coding	NA	NA	NA	NA	NA	NA
0.0008852642615989616-2	NW_022060469.1	10201	11599	+	41.9342	1398	NA	NA	NA	NA			#N/A		NA	NA	NA	NA	NA	NA
5.820265843441281e-06	NC_044378.1	70444801	70448399	+	41.9293	3598	Intergenic	Intergenic	55517	LOC115696814	LOC115696814	XM_030623697	uncharacterized LOC115696814	protein_coding	0.875620617	1	1	-2.303806534	0.003607723	0.034315323
0.0008510119319608074	NC_044373.1	25342601	25343599	+	41.9245	998	Intergenic	Intergenic	-36728	LOC115713277	LOC115713277	XM_030641758	uncharacterized LOC115713277	protein_coding	NA	NA	NA	NA	NA	NA
0.0008181003107851911	NC_044372.1	18185601	18186799	+	41.9149	1198	Intergenic	Intergenic	10765	LOC115711813	LOC115711813	XR_004010683	small nucleolar RNA R71	snoRNA	NA	NA	NA	NA	NA	NA
0.0008181003107851911-2	NC_044378.1	22176601	22178599	+	41.9149	1998	Intergenic	Intergenic	-51071	LOC115697423	LOC115697423	XM_030624419	PRA1 family protein E	protein_coding	0.090673185	1	1	-0.417868412	1	1
4.632700591482483e-06	NC_044378.1	52887401	52890999	+	41.9009	3598	Intergenic	Intergenic	36597	LOC115697318	LOC115697318	XM_030624265	ethylene-responsive transcription factor 4	protein_coding	-1.50171019	0.042977562	0.217696355	-2.28128686	2.09571E-07	5.72242E-06
4.459891599850301e-06	NC_044377.1	57710601	57713999	+	41.8963	3398	Intergenic	Intergenic	7896	LOC115694723	LOC115694723	XM_030621812	30S ribosomal protein S16-2, chloroplastic/mitochondrial	protein_coding	0.567159069	1	1	0.426426294	1	1
4.293551409786151e-06	NC_044370.1	61258201	61261599	+	41.8918	3398	Intergenic	Intergenic	-65032	LOC115703365	LOC115703365	XR_004009137	small nucleolar RNA R71	snoRNA	NA	NA	NA	NA	NA	NA
0.0007268879251810318-2	NC_044377.1	46923001	46924599	+	41.8872	1598	Intergenic	Intergenic	-19751	LOC115696030	LOC115696030	XR_004007631	small nucleolar RNA R71	snoRNA	NA	NA	NA	NA	NA	NA
0.0007268879251810318	NC_044376.1	54033001	54034799	+	41.8872	1798	Intergenic	Intergenic	-156538	LOC115723914	LOC115723914	XM_030653374	uncharacterized LOC115723914	protein_coding	NA	NA	NA	NA	NA	NA
0.000698827780686486-2	NC_044378.1	59668201	59669599	+	41.8783	1398	Intergenic	Intergenic	58729	LOC115697359	LOC115697359	XM_030624333	serine/threonine-protein kinase 38-like,	protein_coding	0.15788432	1	1	0.273602831	1	1
0.000698827780686486	NC_044373.1	16402601	16404399	+	41.8783	1798	Intergenic	Intergenic	17671	LOC115714744	LOC115714744	XM_030643501	kinase-interacting family protein,	protein_coding	0.052464123	1	1	-0.171074362	1	1
0.0006459496004812346	NC_044375.1	67335601	67337399	+	41.8608	1798	Intergenic	Intergenic	3196	LOC115720287	LOC115720287	XM_030649442	protein piccolo-like	protein_coding	NA	NA	NA	NA	NA	NA
0.0006459496004812346-2	NC_044378.1	53848001	53849399	+	41.8608	1398	Intergenic	Intergenic	-57650	LOC115698394	LOC115698394	XR_004008143	small nucleolar RNA R71	snoRNA	NA	NA	NA	NA	NA	NA
0.0006210466467914545	NC_044371.1	82376801	82378399	+	41.8523	1598	intron	-intron (LOC115704431, intron 1 of 1)	398	LOC115704431	LOC115704431	XM_030631637	uncharacterized LOC115704431	protein_coding	NA	NA	NA	NA	NA	NA
0.0006210466467914545-2	NC_044379.1	8376401	8377799	+	41.8523	1398	Intergenic	Intergenic	18264	LOC115701327	LOC115701327	XR_004008533	uncharacterized LOC115701327	lncRNA	-0.227969475	1	1	-5.1909574	5.52885E-07	1.40028E-05
0.0005971140074118745	NC_044370.1	74888401	74890399	+	41.8439	1998	Intergenic	Intergenic	34206	LOC115702567	LOC115702567	XR_004008925	uncharacterized LOC115702567	lncRNA	-0.288278592	1	1	0.247883048	1	1
2.722067068752428e-06-2	NC_044378.1	70486401	70488199	+	41.8397	1798	Intergenic	Intergenic	14817	LOC115696814	LOC115696814	XM_030623697	uncharacterized LOC115696814	protein_coding	0.875620617	1	1	-2.303806534	0.003607723	0.034315323
2.722067068752428e-06	NC_044374.1	55845001	55848399	+	41.8397	3398	Intergenic	Intergenic	89905	LOC115716233	LOC115716233	XM_030644985	probable mediator of RNA polymerase II transcription subunit 37e	protein_coding	0.443060218	1	1	1.225766947	0.40300161	1
0.0005520079672787645-2	NC_044374.1	65011801	65013999	+	41.8274	2198	Intergenic	Intergenic	-17602	LOC115716137	LOC115716137	XM_030644872	signal peptide peptidase-like 2	protein_coding	-0.077531686	1	1	0.126842967	1	1
0.0005520079672787645	NC_044373.1	36069001	36070199	+	41.8274	1198	Intergenic	Intergenic	-31992	LOC115712914	LOC115712914	XR_004010961	uncharacterized LOC115712914	lncRNA	NA	NA	NA	NA	NA	NA
0.0005103430753929838	NC_044373.1	25246001	25247999	+	41.8115	1998	Intergenic	Intergenic	9737	LOC115713276	LOC115713276	XM_030641757	uncharacterized LOC115713276	protein_coding	NA	NA	NA	NA	NA	NA
2.0096677927845554e-06	NC_044372.1	83552401	83553799	+	41.8076	1398	Intergenic	Intergenic	3113	LOC115711023	LOC115711023	XM_030639365	serine/arginine repetitive matrix protein 1-like	protein_coding	NA	NA	NA	NA	NA	NA
2.0096677927845554e-06-2	NC_044372.1	83554601	83556799	+	41.8076	2198	Intergenic	Intergenic	5713	LOC115711023	LOC115711023	XM_030639365	serine/arginine repetitive matrix protein 1-like	protein_coding	NA	NA	NA	NA	NA	NA
0.0004907171782769171	NC_044374.1	32828201	32829999	+	41.8037	1798	intron	-intron (LOC115716656, intron 4 of 6)	5068	LOC115716656	LOC115716656	XM_030645506	F-box protein At4g00755-like,	protein_coding	-0.350474312	1	1	-2.258659732	0.18026518	0.832989797
0.000471853579553521-4	NC_044376.1	16600601	16602199	+	41.796	1598	Intergenic	Intergenic	41210	LOC115722725	LOC115722725	XR_004012841	uncharacterized LOC115722725	lncRNA	1.549169232	0.892939793	NA	1.512629836	0.90002605	NA
0.000471853579553521-2	NC_044372.1	73958401	73959999	+	41.796	1598	Intergenic	Intergenic	-16720	LOC115709419	LOC115709419	XM_030637519	non-specific lipid-transfer protein 2	protein_coding	-4.231435139	1.87417E-07	2.99726E-06	-1.408289042	0.511281974	1
0.000471853579553521	NC_044371.1	23704801	23706799	+	41.796	1998	Intergenic	Intergenic	12352	LOC115704826	LOC115704826	XM_030632032	uncharacterized LOC115704826	protein_coding	-3.075275827	0.005036511	0.034126486	-1.287628456	0.705713201	1
0.000471853579553521-3	NC_044374.1	55679401	55681399	+	41.796	1998	Intergenic	Intergenic	49138	LOC115717861	LOC115717861	XM_030646831	uncharacterized LOC115717861	protein_coding	NA	NA	NA	NA	NA	NA
0.00045372230202922486	NC_044370.1	34451001	34452999	+	41.7884	1998	Intergenic	Intergenic	-6652	LOC115710330	LOC115710330	XM_030638709	eukaryotic translation initiation factor 4G,	protein_coding	-3.344828689	9.91647E-15	4.00132E-13	-0.699825417	1	1
1.6009521284551476e-06	NC_044370.1	24421401	24425199	+	41.7847	3798	Intergenic	Intergenic	7753	LOC115707823	LOC115707823	XM_030635903	pentatricopeptide repeat-containing protein At5g39350	protein_coding	-1.078094508	0.849906303	1	-0.558215567	1	1
0.0004362945657464722-2	NC_044379.1	20037401	20039199	+	41.781	1798	Intergenic	Intergenic	-47785	LOC115700850	LOC115700850	XR_004008457	uncharacterized LOC115700850	lncRNA	NA	NA	NA	NA	NA	NA
0.0004362945657464722	NC_044377.1	43666201	43668199	+	41.781	1998	Intergenic	Intergenic	-436832	LOC115695668	LOC115695668	XM_030622727	uncharacterized protein At1g66480	protein_coding	-3.167632037	5.83816E-07	8.59824E-06	0.071708717	1	1
0.0004195427392272071-2	NC_044376.1	26587801	26589399	+	41.7736	1598	exon	-exon (LOC115723717, exon 1 of 3)	257	LOC115723717	LOC115723717	XM_030653194	uncharacterized LOC115723717	protein_coding	-0.37438412	1	NA	-0.410947537	1	NA
0.0004195427392272071	NC_044374.1	82002201	82003999	+	41.7736	1798	Intergenic	Intergenic	2622	LOC115716464	LOC115716464	XR_004011582	uncharacterized LOC115716464	lncRNA	1.490478895	0.195530034	0.755294684	2.036358885	0.007039018	0.060433695
0.00038796175358216903	NC_044370.1	74640401	74641799	+	41.7592	1398	Intergenic	Intergenic	35029	LOC115724679	LOC115724679	XM_030654022	uncharacterized protein YuxK-like	protein_coding	-0.08349261	1	1	0.341891784	1	1
1.1386492333504948e-06	NC_044370.1	14852801	14857199	+	41.7521	4398	Intergenic	Intergenic	3699	LOC115704049	LOC115704049	XM_030631271	LOB domain-containing protein 40-like	protein_coding	-4.745517708	0.009372525	0.058927295	-4.699694029	0.010368969	0.083122065
0.0003730826630564788	NC_044375.1	2673401	2675599	+	41.7521	2198	Intergenic	Intergenic	46198	LOC115719236	LOC115719236	XM_030648193	uncharacterized LOC115719236	protein_coding	3.032288314	0.168694132	0.674460753	-7.870397164	1.28168E-14	9.19318E-13
1.0963675509827692e-06	NC_044375.1	14979601	14982199	+	41.7486	2598	Intergenic	Intergenic	-5744	LOC115719890	LOC115719890	XM_030649069	uncharacterized LOC115719890	protein_coding	NA	NA	NA	NA	NA	NA
1.0963675509827692e-06-2	NC_044377.1	4893801	4896399	+	41.7486	2598	Intergenic	Intergenic	2477	LOC115724646	LOC115724646	XR_004013241	uncharacterized LOC115724646	lncRNA	3.885212788	0.01888564	0.107217558	-0.66467299	1	1
0.00034502981859354354	NC_044372.1	20579801	20582399	+	41.7383	2598	Intergenic	Intergenic	-15452	LOC115711802	LOC115711802	XR_004010675	small nucleolar RNA R71	snoRNA	NA	NA	NA	NA	NA	NA
0.00033181185601734663-3	NW_022060508.1	33601	35999	+	41.7315	2398	Intergenic	Intergenic	8460	LOC115702263	LOC115702263	XM_030629711	#N/A	protein_coding	NA	NA	NA	NA	NA	NA
0.00033181185601734663	NC_044377.1	38378001	38380199	+	41.7315	2198	Intergenic	Intergenic	-13722	LOC115724953	LOC115724953	XM_030654336	nudix hydrolase 19, chloroplastic	protein_coding	1.149853815	0.280767032	1	0.34325739	1	1
0.00033181185601734663-2	NC_044378.1	24554401	24556799	+	41.7315	2398	Intergenic	Intergenic	18267	LOC115697733	LOC115697733	XM_030624847	transcription elongation factor 1 homolog	protein_coding	-0.006281968	1	1	0.184612823	1	1
0.00031910485080116266-2	NC_044377.1	35822201	35824399	+	41.7249	2198	Intergenic	Intergenic	-41606	LOC115725709	LOC115725709	XM_030655305	double-strand break repair protein MRE11,	protein_coding	0.209719952	1	1	0.461351342	1	1
0.00031910485080116266	NC_044377.1	17228201	17229799	+	41.7249	1598	Intergenic	Intergenic	32763	LOC115695019	LOC115695019	XM_030622117	beta-1,2-xylosyltransferase XYXT1-like	protein_coding	NA	NA	NA	NA	NA	NA
0.00031910485080116266-3	NC_044378.1	67765401	67767399	+	41.7249	1998	Intergenic	Intergenic	-3075	LOC115698077	LOC115698077	XR_004008032	uncharacterized LOC115698077	lncRNA	NA	NA	NA	NA	NA	NA
0.00030688883081654166-2	NC_044375.1	69383201	69385199	+	41.7183	1998	Intergenic	Intergenic	17429	LOC115720306	LOC115720306	XM_030649459	uncharacterized LOC115720306	protein_coding	-0.902321204	1	NA	0.550843851	1	NA
0.00030688883081654166	NC_044375.1	5819001	5821599	+	41.7183	2598	Intergenic	Intergenic	-6218	LOC115719806	LOC115719806	XM_030648996	uncharacterized LOC115719806	protein_coding	NA	NA	NA	NA	NA	NA
0.00030688883081654166-3	NC_044377.1	29780601	29782199	+	41.7183	1598	Intergenic	Intergenic	-28515	LOC115724533	LOC115724533	XM_030653831	65-kDa microtubule-associated protein 1	protein_coding	-1.048662497	0.700601904	1	-0.490257238	1	1
0.0002951446154456711	NC_044370.1	73282601	73284599	+	41.7118	1998	promoter-TSS	-promoter-TSS (LOC115724545)	-451	LOC115724545	LOC115724545	XM_030653850	uncharacterized LOC115724545	protein_coding	NA	NA	NA	NA	NA	NA
6.964515503761535e-07	NC_044377.1	59167601	59171799	+	41.7086	4198	Intergenic	Intergenic	-21609	LOC115695310	LOC115695310	XM_030622384	uncharacterized LOC115695310	protein_coding	NA	NA	NA	NA	NA	NA
0.00028385378366647897	NC_044378.1	26634201	26635799	+	41.7054	1598	Intergenic	Intergenic	28124	LOC115698047	LOC115698047	XM_030625234	ethylene-responsive transcription factor 12	protein_coding	-5.215762884	0.003673945	0.025898146	-5.393565693	0.00244609	0.024787134
0.0002625622024342451	NC_044375.1	47835001	47836199	+	41.6928	1198	Intergenic	Intergenic	9114	LOC115720148	LOC115720148	XM_030649306	uncharacterized LOC115720148	protein_coding	NA	NA	NA	NA	NA	NA
0.0002625622024342451-2	NC_044378.1	11669801	11671599	+	41.6928	1798	Intergenic	Intergenic	11525	LOC115698154	LOC115698154	XM_030625335	copper transporter 1-like	protein_coding	-3.078685475	0.420924783	NA	-0.410949364	1	NA
5.34627480428653e-07	NC_044378.1	11154201	11159599	+	41.6866	5398	Intergenic	Intergenic	7475	LOC115698069	LOC115698069	XM_030625251	probable glutathione S-transferase	protein_coding	0.19877089	1	1	-1.522691687	0.515781001	1
0.0002525281397614777	NC_044377.1	18791801	18794399	+	41.6866	2598	Intergenic	Intergenic	16803	LOC115724926	LOC115724926	XM_030654301	probable WRKY transcription factor 20,	protein_coding	-0.027180609	1	1	0.046064979	1	1
0.0002525281397614777-2	NC_044378.1	12727601	12729799	+	41.6866	2198	Intergenic	Intergenic	4615	LOC115698006	LOC115698006	XM_030625185	protein RALF-like 4	protein_coding	0.257416023	1	1	-2.756158817	0.087674022	0.477573739
0.00023360506289616333	NC_044379.1	18927801	18929999	+	41.6745	2198	Intergenic	Intergenic	137757	LOC115699590	LOC115699590	XM_030627078	uncharacterized LOC115699590	protein_coding	0.082017121	1	1	-0.166417741	1	1
0.00023360506289616333-2	NW_022060476.1	727801	730399	+	41.6745	2598	Intergenic	Intergenic	-2700	LOC115702188	LOC115702188	XM_030629636	#N/A	protein_coding	NA	NA	NA	NA	NA	NA
0.0002246865272874137	NC_044374.1	11176601	11178199	+	41.6686	1598	intron	-intron (LOC115717173, intron 1 of 1)	793	LOC115717173	LOC115717173	XM_030646125	uncharacterized LOC115717173	protein_coding	0.579096446	1	1	-2.46103524	0.216827275	0.953791922
0.00021611127858261857-2	NC_044372.1	39097601	39099599	+	41.6628	1998	Intergenic	Intergenic	83504	LOC115708652	LOC115708652	XM_030636632	uncharacterized LOC115708652	protein_coding	-2.335330951	0.014011883	0.083441891	-2.580647495	0.003556982	0.033916598
0.00021611127858261857	NC_044370.1	67430001	67431799	+	41.6628	1798	Intergenic	Intergenic	-51628	LOC115713581	LOC115713581	XM_030642072	protein SNOWY COTYLEDON 3	protein_coding	NA	NA	NA	NA	NA	NA
0.00019231439478689912	NC_044372.1	50940601	50942599	+	41.6456	1998	Intergenic	Intergenic	172072	LOC115710754	LOC115710754	XM_030639106	uncharacterized mitochondrial protein AtMg00310-like	protein_coding	NA	NA	NA	NA	NA	NA
0.00019231439478689912-2	NC_044376.1	12432001	12433799	+	41.6456	1798	Intergenic	Intergenic	-14598	LOC115723288	LOC115723288	XM_030652728	sphingoid long-chain bases kinase 1,	protein_coding	-0.047991283	1	1	-0.08505685	1	1
0.00018498397817217493	NC_044378.1	48366201	48368199	+	41.6401	1998	Intergenic	Intergenic	-58397	LOC115696615	LOC115696615	XM_030623510	uncharacterized LOC115696615	protein_coding	NA	NA	NA	NA	NA	NA
0.00017115703011605162	NC_044372.1	51460401	51463199	+	41.6291	2798	Intergenic	Intergenic	169616	LOC115710755	LOC115710755	XM_030639108	uncharacterized LOC115710755	protein_coding	NA	NA	NA	NA	NA	NA
0.00015837124551162473	NC_044374.1	72237201	72239399	+	41.6185	2198	Intergenic	Intergenic	-248966	LOC115717117	LOC115717117	XM_030646063	SPX domain-containing membrane protein At4g22990,	protein_coding	1.48290583	0.0882296	0.398973794	1.740435318	0.009002601	0.074050923
0.0001523438270009514	NC_044370.1	77837001	77839199	+	41.6132	2198	Intergenic	Intergenic	52042	LOC115717605	LOC115717605	XM_030646589	universal stress protein PHOS34,	protein_coding	-0.304232399	1	1	-0.057552165	1	1
0.0001465475221593052	NC_044379.1	31394401	31396999	+	41.6081	2598	Intergenic	Intergenic	-6747	LOC115698561	LOC115698561	XM_030625653	F-box protein At2g32560,	protein_coding	-0.012798671	1	1	-0.369482455	1	1
0.00014097338853744497	NC_044372.1	21041801	21044399	+	41.603	2598	Intergenic	Intergenic	-140667	LOC115709313	LOC115709313	XM_030637390	flavonoid 3'-monooxygenase	protein_coding	0.568572357	1	1	0.699828561	1	1
1.5997630214011255e-07	NC_044375.1	40776201	40778799	+	41.5979	2598	Intergenic	Intergenic	-56756	LOC115720992	LOC115720992	XR_004012357	uncharacterized LOC115720992	lncRNA	NA	NA	NA	NA	NA	NA
0.00013045760066903638	NC_044370.1	89408001	89410799	+	41.5929	2798	Intergenic	Intergenic	-2867	LOC115697268	LOC115697268	XM_030624205	cellulose synthase A catalytic subunit 1 [UDP-forming]	protein_coding	-0.935907591	1	1	-0.816591673	1	1
0.00013045760066903638-2	NC_044375.1	68318401	68320599	+	41.5929	2198	Intergenic	Intergenic	-14518	LOC115721570	LOC115721570	XR_004012585	small nucleolar RNA R71	snoRNA	NA	NA	NA	NA	NA	NA
0.00012073167544711303	NC_044374.1	50747201	50749599	+	41.5831	2398	Intergenic	Intergenic	-9316	LOC115716208	LOC115716208	XM_030644950	phosphoribulokinase, chloroplastic	protein_coding	3.481369836	1.9744E-34	3.58056E-32	1.653224553	0.00113167	0.012918111
1.2292226713754442e-07	NC_044373.1	32726401	32731799	+	41.5807	5398	Intergenic	Intergenic	17370	LOC115713337	LOC115713337	XM_030641817	uncharacterized LOC115713337	protein_coding	NA	NA	NA	NA	NA	NA
0.00011614603276915777	NC_044377.1	59283801	59285599	+	41.5783	1798	Intergenic	Intergenic	7614	LOC115724571	LOC115724571	XM_030653882	uncharacterized LOC115724571	protein_coding	-1.397904859	0.383394779	1	-0.367489051	1	1
1.0184481137195962e-07	NC_044375.1	38239001	38243799	+	41.5688	4798	Intergenic	Intergenic	-19599	LOC115720061	LOC115720061	XM_030649224	uncharacterized LOC115720061	protein_coding	NA	NA	NA	NA	NA	NA
9.808544053754311e-08	NW_022060476.1	374401	378199	+	41.5665	3798	Intergenic	Intergenic	-355500	LOC115702188	LOC115702188	XM_030629636	#N/A	protein_coding	NA	NA	NA	NA	NA	NA
0.00010341468868467222	NC_044374.1	37110201	37113199	+	41.5642	2998	Intergenic	Intergenic	28359	LOC115718326	LOC115718326	XR_004011905	small nucleolar RNA R71	snoRNA	NA	NA	NA	NA	NA	NA
9.949108413070875e-05	NC_044375.1	64018801	64020999	+	41.5595	2198	Intergenic	Intergenic	17149	LOC115720253	LOC115720253	XM_030649409	uncharacterized mitochondrial protein AtMg00310-like	protein_coding	NA	NA	NA	NA	NA	NA
8.762121822399965e-08	NC_044377.1	70494401	70498599	+	41.5595	4198	promoter-TSS	-promoter-TSS (LOC115695439)	-444	LOC115695439	LOC115695439	XM_030622505	uncharacterized LOC115695439	protein_coding	0	1	NA	-0.410947537	1	NA
9.571735419393947e-05	NC_044370.1	48557401	48559799	+	41.555	2398	Intergenic	Intergenic	-16273	LOC115721091	LOC115721091	XM_030650338	uncharacterized LOC115721091	protein_coding	NA	NA	NA	NA	NA	NA
9.571735419393947e-05-2	NC_044373.1	6422401	6424199	+	41.555	1798	Intergenic	Intergenic	-2498	LOC115713123	LOC115713123	XM_030641609	anther-specific protein BCP1	protein_coding	-0.42556008	1	1	-2.99272315	0.065876689	0.380741908
9.208772697296543e-05	NC_044375.1	1579401	1581799	+	41.5505	2398	Intergenic	Intergenic	3491	LOC115718611	LOC115718611	XM_030647427	uncharacterized LOC115718611	protein_coding	0	1	NA	-0.410947537	1	NA
6.486516635889184e-08	NC_044377.1	44028001	44032799	+	41.5416	4798	Intergenic	Intergenic	-73632	LOC115695668	LOC115695668	XM_030622727	uncharacterized protein At1g66480	protein_coding	-3.167632037	5.83816E-07	8.59824E-06	0.071708717	1	1
8.200905752561762e-05-2	NC_044378.1	67927601	67929999	+	41.5373	2398	Intergenic	Intergenic	10912	LOC115697186	LOC115697186	XM_030624096	transcription factor bHLH144	protein_coding	-0.841728328	1	1	0.421301972	1	1
8.200905752561762e-05	NC_044373.1	60281001	60282999	+	41.5373	1998	Intergenic	Intergenic	21674	LOC115715050	LOC115715050	XR_004011166	uncharacterized LOC115715050	lncRNA	NA	NA	NA	NA	NA	NA
6.761594098116104e-05	NC_044371.1	1400801	1403399	+	41.5162	2598	Intergenic	Intergenic	-9905	LOC115708225	LOC115708225	XM_030636444	signal recognition particle 14 kDa protein	protein_coding	-0.368941324	1	1	0.248744104	1	1
6.761594098116104e-05-2	NC_044379.1	52019601	52021999	+	41.5162	2398	Intergenic	Intergenic	-3227	LOC115700247	LOC115700247	XM_030627814	uncharacterized LOC115700247	protein_coding	NA	NA	NA	NA	NA	NA
6.259701441218306e-05	NC_044375.1	43985001	43987399	+	41.5081	2398	Intergenic	Intergenic	-25410	LOC115720115	LOC115720115	XM_030649277	uncharacterized LOC115720115	protein_coding	NA	NA	NA	NA	NA	NA
6.0229891342551785e-05	NC_044376.1	6272801	6275199	+	41.5041	2398	Intergenic	Intergenic	-46136	LOC115723514	LOC115723514	XM_030653008	uncharacterized LOC115723514	protein_coding	NA	NA	NA	NA	NA	NA
2.839674025084901e-08	NC_044372.1	42240201	42246799	+	41.4962	6598	Intergenic	Intergenic	-8888	LOC115711243	LOC115711243	XM_030639575	peroxidase 21	protein_coding	-5.806442756	9.3265E-22	6.72742E-20	-3.437607909	1.24089E-06	2.91253E-05
5.162813187594727e-05	NC_044370.1	72413201	72415799	+	41.4885	2598	Intergenic	Intergenic	-21088	LOC115714354	LOC115714354	XM_030643031	GDSL esterase/lipase EXL3	protein_coding	0.264727405	1	1	-0.400371679	1	1
2.354038857908728e-08	NC_044378.1	46395201	46401799	+	41.4866	6598	Intergenic	Intergenic	-9428	LOC115696607	LOC115696607	XM_030623500	glucose-1-phosphate adenylyltransferase large subunit 1, chloroplastic-like	protein_coding	5.007344676	7.73075E-08	1.31512E-06	1.432765796	0.303193499	1
4.9678096118739644e-05	NC_044377.1	61271601	61273799	+	41.4847	2198	Intergenic	Intergenic	14281	LOC115725634	LOC115725634	XM_030655214	protein OS-9 homolog	protein_coding	0.005145773	1	1	0.152022495	1	1
4.259100310292059e-05	NC_044376.1	14261601	14264199	+	41.4699	2598	Intergenic	Intergenic	7329	LOC115723593	LOC115723593	XM_030653080	uncharacterized LOC115723593	protein_coding	NA	NA	NA	NA	NA	NA
1.6798229026952932e-08	NC_044375.1	31775801	31779199	+	41.4699	3398	Intergenic	Intergenic	20372	LOC115720028	LOC115720028	XM_030649194	uncharacterized LOC115720028	protein_coding	NA	NA	NA	NA	NA	NA
4.098412205975229e-05	NC_044373.1	8775601	8778599	+	41.4663	2998	Intergenic	Intergenic	-36544	LOC115715526	LOC115715526	XR_004011393	small nucleolar RNA R71	snoRNA	NA	NA	NA	NA	NA	NA
1.2447107055679292e-08	NC_044377.1	5511601	5514999	+	41.4557	3398	Intergenic	Intergenic	-5446	LOC115724599	LOC115724599	XM_030653915	WAT1-related protein At4g30420	protein_coding	-1.035386988	0.962983843	1	-2.063972425	0.15975081	0.760497726
3.6520046445354753e-05	NC_044377.1	10563401	10565799	+	41.4557	2398	Intergenic	Intergenic	16066	LOC115725268	LOC115725268	XM_030654724	probable sucrose-phosphate synthase 1	protein_coding	-0.280096092	1	1	0.084150531	1	1
3.514341070060297e-05	NC_044375.1	40283601	40286799	+	41.4522	3198	Intergenic	Intergenic	-11200	LOC115720085	LOC115720085	XM_030649247	uncharacterized LOC115720085	protein_coding	NA	NA	NA	NA	NA	NA
3.0139097998976756e-05-2	NC_044373.1	65240201	65243199	+	41.4387	2998	Intergenic	Intergenic	-143751	LOC115715342	LOC115715342	XR_004011218	small nucleolar RNA R71	snoRNA	NA	NA	NA	NA	NA	NA
3.0139097998976756e-05	NC_044370.1	31040601	31042999	+	41.4387	2398	Intergenic	Intergenic	9159	LOC115709832	LOC115709832	XM_030638070	uncharacterized mitochondrial protein AtMg00810-like	protein_coding	NA	NA	NA	NA	NA	NA
2.3942230377980024e-05	NC_044370.1	48357801	48361799	+	41.4193	3998	Intergenic	Intergenic	-13365	LOC115721033	LOC115721033	XM_030650267	putative disease resistance protein RGA3	protein_coding	-2.370841854	0.413833947	1	-3.067029432	0.21023752	0.930982686
2.0539420317154414e-05	NC_044374.1	15856001	15857799	+	41.407	1798	Intergenic	Intergenic	-5239	LOC115717004	LOC115717004	XM_030645928	uncharacterized LOC115717004	protein_coding	3.084021004	6.87888E-16	3.06094E-14	1.564275674	0.025479549	0.175679117
1.8310071294220408e-05	NC_044372.1	57141201	57143599	+	41.3981	2398	Intergenic	Intergenic	-29252	LOC115710178	LOC115710178	XM_030638519	translation initiation factor eIF-2B subunit delta,	protein_coding	0.867788618	1	1	0.802689806	1	1
1.76223448275714e-05	NC_044376.1	13622601	13624999	+	41.3952	2398	Intergenic	Intergenic	36659	LOC115724394	LOC115724394	XR_004013187	small nucleolar RNA R71	snoRNA	NA	NA	NA	NA	NA	NA
1.348236606769705e-05	NC_044372.1	5864401	5867199	+	41.3754	2798	Intergenic	Intergenic	2429	LOC115710353	LOC115710353	XM_030638722	uncharacterized LOC115710353	protein_coding	NA	NA	NA	NA	NA	NA
1.2490086426511414e-05	NC_044374.1	52088801	52091199	+	41.37	2398	Intergenic	Intergenic	5778	LOC115717834	LOC115717834	XM_030646805	ATP synthase subunit 9, mitochondrial	protein_coding	0	1	NA	-0.410947537	1	NA
1.2021800897459594e-05-2	NC_044371.1	39115601	39118399	+	41.3673	2798	Intergenic	Intergenic	-56408	LOC115707502	LOC115707502	XR_004009749	uncharacterized LOC115707502	lncRNA	NA	NA	NA	NA	NA	NA
1.2021800897459594e-05	NC_044370.1	53016801	53019599	+	41.3673	2798	Intergenic	Intergenic	-154122	LOC115712065	LOC115712065	XM_030640287	#N/A	protein_coding	-0.110053687	1	1	0.515502062	1	1
9.931922948698069e-06	NC_044377.1	70865201	70869199	+	41.3542	3998	Intergenic	Intergenic	-5302	LOC115725460	LOC115725460	XR_004013403	uncharacterized LOC115725460	lncRNA	NA	NA	NA	NA	NA	NA
7.899554726265945e-06	NC_044377.1	27711001	27714799	+	41.3392	3798	Intergenic	Intergenic	57819	LOC115695672	LOC115695672	XM_030622734	stigma-specific STIG1-like protein 1	protein_coding	0	1	NA	-0.410947537	1	NA
7.319489953079195e-06	NW_022060417.1	1225001	1228199	+	41.3344	3198	Intergenic	Intergenic	171031	LOC115702077	LOC115702077	XR_004008793	#N/A	snoRNA	NA	NA	NA	NA	NA	NA
6.049542766828595e-06	NC_044377.1	31543401	31545799	+	41.3227	2398	Intergenic	Intergenic	-16276	LOC115725207	LOC115725207	XM_030654645	probable galacturonosyltransferase 12	protein_coding	-1.651089012	0.453254304	1	-3.943157279	0.000647383	0.00808094
5.605796757131916e-06	NC_044378.1	7317001	7320599	+	41.3181	3598	TTS	-TTS (LOC115698101)	8810	LOC115698101	LOC115698101	XM_030625276	uncharacterized LOC115698101,	protein_coding	-0.712166326	1	1	-0.51503006	1	1
5.396330679909486e-06	NC_044375.1	34491201	34494599	+	41.3159	3398	Intergenic	Intergenic	-34071	LOC115720039	LOC115720039	XM_030649204	uncharacterized LOC115720039	protein_coding	NA	NA	NA	NA	NA	NA
5.000673488691386e-06	NC_044375.1	17269201	17273599	+	41.3114	4398	TTS	-TTS (LOC115718774)	-2990	LOC115719920	LOC115719920	XM_030649093	uncharacterized LOC115719920	protein_coding	NA	NA	NA	NA	NA	NA
1.5755086123602613e-10	NC_044376.1	60134601	60141199	+	41.2974	6598	exon	-exon (LOC115724147, exon 1 of 2)	712	LOC115724147	LOC115724147	XR_004013009	uncharacterized LOC115724147	lncRNA	-1.133568466	0.958355672	NA	-3.619116948	0.269048882	NA
2.7215389988694936e-06	NC_044378.1	51505801	51509199	+	41.2781	3398	Intergenic	Intergenic	12190	LOC115698221	LOC115698221	XR_004008075	uncharacterized LOC115698221	lncRNA	1.549149048	0.892943704	NA	-0.911795263	1	NA
1.8619805906969944e-06	NC_044377.1	43991001	43994599	+	41.2593	3598	Intergenic	Intergenic	-111232	LOC115695668	LOC115695668	XM_030622727	uncharacterized protein At1g66480	protein_coding	-3.167632037	5.83816E-07	8.59824E-06	0.071708717	1	1
6.209871999863105e-07	NW_022060487.1	364801	368599	+	41.2114	3798	NA	NA	NA	NA			#N/A		NA	NA	NA	NA	NA	NA
2.3469070482011724e-08	NC_044372.1	38925201	38930599	+	41.1097	5398	Intergenic	Intergenic	31685	LOC115710679	LOC115710679	XM_030639031	glycosyltransferase BC10-like	protein_coding	NA	NA	NA	NA	NA	NA
0.0004033680787890951-2	NC_044371.1	19002601	19004399	+	40.7468	1798	promoter-TSS	-promoter-TSS (LOC115708453)	-1301	LOC115708453	LOC115708453	XR_004009952	small nucleolar RNA R71	snoRNA	NA	NA	NA	NA	NA	NA
0.0008190595372539288-2	NC_044374.1	72566401	72567999	+	40.7468	1598	Intergenic	Intergenic	-161003	LOC115717969	LOC115717969	XM_030646937	uncharacterized LOC115717969	protein_coding	NA	NA	NA	NA	NA	NA
0.0011243649976867172-2	NC_044374.1	5455801	5457399	+	40.7468	1598	Intergenic	Intergenic	11506	LOC115717022	LOC115717022	XM_030645949	uncharacterized LOC115717022,	protein_coding	0.1515772	1	1	-0.440610879	1	1
1.0492315952186176e-07	NC_044373.1	66358401	66362999	+	40.7468	4598	Intergenic	Intergenic	7363	LOC115713588	LOC115713588	XM_030642076	uncharacterized LOC115713588	protein_coding	NA	NA	NA	NA	NA	NA
2.90276863317398e-07	NC_044374.1	15051601	15055399	+	40.7468	3798	Intergenic	Intergenic	41351	LOC115715816	LOC115715816	XM_030644487	serine carboxypeptidase-like 45	protein_coding	-1.366627001	0.90774315	NA	-2.38538962	0.653463734	NA
0.0006723708348195882	NC_044376.1	38248801	38250599	+	40.7468	1798	Intergenic	Intergenic	-16916	LOC115724245	LOC115724245	XR_004013046	small nucleolar RNA R71	snoRNA	NA	NA	NA	NA	NA	NA
0.0016085992745764938-2	NC_044374.1	8990801	8991999	+	40.7468	1198	Intergenic	Intergenic	-4488	LOC115717540	LOC115717540	XM_030646526	uncharacterized LOC115717540	protein_coding	NA	NA	NA	NA	NA	NA
0.0022154238542797253	NC_044370.1	29619201	29620399	+	40.7468	1198	Intergenic	Intergenic	-13717	LOC115719596	LOC115719596	XM_030648696	uncharacterized LOC115719596	protein_coding	NA	NA	NA	NA	NA	NA
0.0007873305474493323-3	NC_044378.1	9498201	9499399	+	40.7468	1198	Intergenic	Intergenic	27404	LOC115697856	LOC115697856	XM_030625011	BAHD acyltransferase DCR	protein_coding	-2.685542466	7.63531E-06	9.45097E-05	1.132175764	0.730698019	1
0.00020762578413982026	NC_044374.1	82890601	82892999	+	40.7468	2398	Intergenic	Intergenic	-5258	LOC115718086	LOC115718086	XM_030647049	glycine-rich cell wall structural protein 1-like	protein_coding	NA	NA	NA	NA	NA	NA
1.5290684998810199e-07	NC_044377.1	24835401	24839399	+	40.7468	3998	Intergenic	Intergenic	31852	LOC115695060	LOC115695060	XM_030622157	uncharacterized LOC115695060	protein_coding	NA	NA	NA	NA	NA	NA
4.7424931208603557e-07	NC_044377.1	42480001	42483799	+	40.7468	3798	Intergenic	Intergenic	-5874	LOC115695199	LOC115695199	XM_030622284	uncharacterized LOC115695199	protein_coding	NA	NA	NA	NA	NA	NA
0.001318053131540343	NC_044371.1	10226601	10228199	+	40.7468	1598	promoter-TSS	-promoter-TSS (LOC115708406)	-989	LOC115708406	LOC115708406	XR_004009908	small nucleolar RNA R71	snoRNA	NA	NA	NA	NA	NA	NA
0.0009982535669872698-2	NC_044373.1	12644401	12645799	+	40.7468	1398	Intergenic	Intergenic	44756	LOC115712325	LOC115712325	XR_004010840	uncharacterized LOC115712325	lncRNA	2.490376499	0.711778827	NA	0.719543346	1	NA
0.0018873752638361744-3	NC_044378.1	53114801	53116199	+	40.7468	1398	Intergenic	Intergenic	-47317	LOC115697749	LOC115697749	XR_004007985	uncharacterized LOC115697749	lncRNA	NA	NA	NA	NA	NA	NA
0.0004907947385944558	NC_044374.1	13041601	13044399	+	40.7468	2798	Intergenic	Intergenic	-4270	LOC115717381	LOC115717381	XM_030646352	O-glucosyltransferase rumi homolog	protein_coding	-0.906817711	1	1	-1.576462465	0.258135989	1
0.0023061484234464325	NC_044374.1	35504401	35505399	+	40.7468	998	Intergenic	Intergenic	-5089	LOC115717269	LOC115717269	XR_004011724	uncharacterized LOC115717269	lncRNA	NA	NA	NA	NA	NA	NA
0.001545693459349405-2	NC_044374.1	57111201	57112799	+	40.7468	1598	promoter-TSS	-promoter-TSS (LOC115718233)	-1770	LOC115718233	LOC115718233	XR_004011817	small nucleolar RNA R71	snoRNA	NA	NA	NA	NA	NA	NA
0.0016085992745764938	NC_044370.1	27146801	27148599	+	40.7468	1798	intron	-intron (LOC115708359, intron 3 of 3)	30911	LOC115708202	LOC115708202	XM_030636416	protein S-acyltransferase 8	protein_coding	-0.464401744	1	1	0.003703833	1	1
3.2507702696851167e-07	NC_044373.1	48244601	48246999	+	40.7468	2398	Intergenic	Intergenic	11543	LOC115715420	LOC115715420	XR_004011291	small nucleolar RNA R71	snoRNA	NA	NA	NA	NA	NA	NA
0.0004033680787890951	NC_044371.1	12960401	12962399	+	40.7468	1998	Intergenic	Intergenic	-15300	LOC115703786	LOC115703786	XM_030631017	GDSL esterase/lipase At2g40250-like	protein_coding	-0.374376113	1	NA	0	1	NA
0.0008190595372539288	NC_044374.1	36253001	36254799	+	40.7468	1798	Intergenic	Intergenic	17588	LOC115716623	LOC115716623	XM_030645458	protein LURP-one-related 8	protein_coding	1.157015193	0.408804474	1	0.228742182	1	1
0.0009594836710318845-3	NC_044374.1	83062801	83064599	+	40.7468	1798	Intergenic	Intergenic	4540	LOC115718091	LOC115718091	XM_030647054	uncharacterized LOC115718091	protein_coding	NA	NA	NA	NA	NA	NA
0.00017091715241282745	NC_044376.1	25696001	25698799	+	40.7468	2798	Intergenic	Intergenic	2330	LOC115723708	LOC115723708	XM_030653187	uncharacterized LOC115723708	protein_coding	NA	NA	NA	NA	NA	NA
9.552097048502097e-05	NC_044378.1	50100801	50103599	+	40.7468	2798	Intergenic	Intergenic	-129482	LOC115698405	LOC115698405	XR_004008153	small nucleolar RNA R71	snoRNA	NA	NA	NA	NA	NA	NA
0.00030670160091099164-2	NC_044377.1	22437001	22439399	+	40.7468	2398	Intergenic	Intergenic	-4701	LOC115725754	LOC115725754	XM_030655357	uncharacterized LOC115725754,	protein_coding	-0.066127599	1	1	0.271480373	1	1
0.0011243649976867172	NC_044370.1	36297201	36298599	+	40.7468	1398	intron	-intron (LOC115710480, intron 6 of 6)	-14195	LOC115710473	LOC115710473	XM_030638836	putative indole-3-acetic acid-amido synthetase GH3.9	protein_coding	-2.304222901	0.133954897	0.560394989	2.685481662	0.092556932	0.496989361
0.0009982535669872698	NC_044371.1	32469801	32471599	+	40.7468	1798	Intergenic	Intergenic	6044	LOC115705041	LOC115705041	XR_004009378	uncharacterized LOC115705041	lncRNA	-0.977779639	1	1	-1.346228371	0.494672606	1
0.0003586470617743065	NC_044370.1	34444201	34446799	+	40.7468	2598	Intergenic	Intergenic	-13152	LOC115710330	LOC115710330	XM_030638709	eukaryotic translation initiation factor 4G,	protein_coding	-3.344828689	9.91647E-15	4.00132E-13	-0.699825417	1	1
0.0023061484234464325-2	NC_044374.1	83985601	83986799	+	40.7468	1198	Intergenic	Intergenic	-18609	LOC115718104	LOC115718104	XM_030647065	protein LURP-one-related 17	protein_coding	-2.863454616	0.325573651	NA	-2.640369138	0.39117889	NA
2.7825371970306674e-05	NW_022060487.1	113001	115599	+	40.7468	2598	NA	NA	NA	NA			#N/A		NA	NA	NA	NA	NA	NA
0.0004907947385944558-2	NC_044375.1	38567401	38569599	+	40.7468	2198	intron	-intron (LOC115720065, intron 1 of 12)	12349	LOC115720065	LOC115720065	XM_030649228	rho GTPase-activating protein 7	protein_coding	0.057524309	1	1	-0.100451943	1	1
0.0022154238542797253-2	NC_044375.1	35886801	35888399	+	40.7468	1598	Intergenic	Intergenic	38592	LOC115720780	LOC115720780	XM_030649960	DNA excision repair protein ERCC-1	protein_coding	0.391669893	1	1	0.018387579	1	1
1.6902036395089164e-05	NC_044371.1	43675401	43677399	+	40.7468	1998	Intergenic	Intergenic	91421	LOC115704065	LOC115704065	XM_030631287	uncharacterized LOC115704065	protein_coding	NA	NA	NA	NA	NA	NA
0.001371559673416074	NC_044377.1	26045801	26047199	+	40.7468	1398	Intergenic	Intergenic	6065	LOC115695067	LOC115695067	XM_030622162	uncharacterized LOC115695067	protein_coding	NA	NA	NA	NA	NA	NA
0.001371559673416074-3	NW_022060368.1	109001	111199	+	40.7468	2198	Intergenic	Intergenic	-11517	LOC115702020	LOC115702020	XR_004008778	#N/A	lncRNA	NA	NA	NA	NA	NA	NA
0.0007873305474493323	NC_044371.1	284801	286399	+	40.7468	1598	promoter-TSS	-promoter-TSS (LOC115708430)	-1586	LOC115708430	LOC115708430	XR_004009931	small nucleolar RNA R71	snoRNA	NA	NA	NA	NA	NA	NA
0.00011593136214831909	NC_044373.1	42310201	42313799	+	40.7468	3598	Intergenic	Intergenic	60382	LOC115712108	LOC115712108	XR_004010790	uncharacterized LOC115712108	lncRNA	NA	NA	NA	NA	NA	NA
0.00017091715241282745-2	NC_044377.1	656001	657399	+	40.7468	1398	Intergenic	Intergenic	5180	LOC115725788	LOC115725788	XM_030621756	rust resistance kinase Lr10	protein_coding	1.204525346	0.37087839	1	1.715003835	0.001914297	0.020148269
0.00030670160091099164	NC_044373.1	30063801	30065599	+	40.7468	1798	Intergenic	Intergenic	34088	LOC115712551	LOC115712551	XM_030640848	peptidyl-prolyl cis-trans isomerase PASTICCINO1	protein_coding	-0.36799138	1	1	-0.509765209	1	1
0.0023061484234464325-3	NC_044375.1	2928201	2929599	+	40.7468	1398	Intergenic	Intergenic	-17239	LOC115721404	LOC115721404	XR_004012453	uncharacterized LOC115721404	lncRNA	-0.37438412	1	NA	-0.410947537	1	NA
0.0003448811868833939-2	NC_044372.1	68994001	68995599	+	40.7468	1598	Intergenic	Intergenic	13388	LOC115710886	LOC115710886	XM_030639238	uncharacterized LOC115710886	protein_coding	NA	NA	NA	NA	NA	NA
0.00021587263202878796	NC_044370.1	95023401	95024599	+	40.7468	1198	Intergenic	Intergenic	26659	LOC115703029	LOC115703029	XM_030630512	uncharacterized LOC115703029	protein_coding	-1.33994218	0.597118852	1	-1.717499992	0.263158676	1
0.001318053131540343-2	NC_044375.1	73351801	73353799	+	40.7468	1998	Intergenic	Intergenic	-2676	LOC115721397	LOC115721397	XM_030650682	subtilisin-like protease SBT4.6	protein_coding	0	1	NA	-1.987987413	0.80439245	NA
0.0018873752638361744	NC_044370.1	15450801	15452399	+	40.7468	1598	Intergenic	Intergenic	-4989	LOC115704122	LOC115704122	XM_030631344	probable pectin methylesterase CGR3	protein_coding	-1.009314576	0.962540305	1	-0.119091276	1	1
3.535624144359799e-06	NC_044376.1	41212201	41215999	+	40.7468	3798	Intergenic	Intergenic	-2749	LOC115724280	LOC115724280	XR_004013078	small nucleolar RNA R71	snoRNA	-0.374376113	1	NA	0	1	NA
0.0004907947385944558-3	NC_044378.1	28196001	28197999	+	40.7468	1998	TTS	-TTS (LOC115696827)	1627	LOC115696827	LOC115696827	XR_004007785	uncharacterized LOC115696827	lncRNA	-0.37438412	1	NA	-0.410947537	1	NA
0.0009594836710318845-2	NC_044373.1	12186001	12187599	+	40.7468	1598	Intergenic	Intergenic	-51684	LOC115714717	LOC115714717	XM_030643475	transcription factor bHLH63,	protein_coding	0.11385001	1	1	0.863452998	1	1
1.8960533852439368e-05	NC_044373.1	10105201	10107399	+	40.7468	2198	Intergenic	Intergenic	24635	LOC115713164	LOC115713164	XM_030641652	uncharacterized LOC115713164	protein_coding	NA	NA	NA	NA	NA	NA
1.6902036395089164e-05-2	NC_044375.1	79841001	79845599	+	40.7468	4598	Intergenic	Intergenic	-9128	LOC115718682	LOC115718682	XR_004012004	uncharacterized LOC115718682	lncRNA	NA	NA	NA	NA	NA	NA
0.0023061484234464325-4	NC_044375.1	51807401	51808599	+	40.7468	1198	Intergenic	Intergenic	-10712	LOC115720181	LOC115720181	XM_030649339	uncharacterized mitochondrial protein AtMg00810-like	protein_coding	NA	NA	NA	NA	NA	NA
5.149244456043969e-05	NC_044377.1	43635801	43638199	+	40.7468	2398	Intergenic	Intergenic	-467032	LOC115695668	LOC115695668	XM_030622727	uncharacterized protein At1g66480	protein_coding	-3.167632037	5.83816E-07	8.59824E-06	0.071708717	1	1
0.00015813440535539794	NC_044370.1	4646801	4649999	+	40.7468	3198	Intergenic	Intergenic	-19388	LOC115703065	LOC115703065	XR_004009001	uncharacterized LOC115703065	lncRNA	NA	NA	NA	NA	NA	NA
0.0009982535669872698-3	NC_044374.1	77052201	77053599	+	40.7468	1398	Intergenic	Intergenic	497142	LOC115718006	LOC115718006	XM_030646974	uncharacterized LOC115718006	protein_coding	0	1	NA	-0.410947537	1	NA
0.0016085992745764938-4	NC_044378.1	52957601	52958799	+	40.7468	1198	Intergenic	Intergenic	105597	LOC115697318	LOC115697318	XM_030624265	ethylene-responsive transcription factor 4	protein_coding	-1.50171019	0.042977562	0.217696355	-2.28128686	2.09571E-07	5.72242E-06
0.0018873752638361744-2	NC_044370.1	40371201	40372999	+	40.7468	1798	Intergenic	Intergenic	5454	LOC115720325	LOC115720325	XM_030649478	uncharacterized LOC115720325	protein_coding	NA	NA	NA	NA	NA	NA
4.793922125359417e-06	NC_044376.1	56213801	56216799	+	40.7468	2998	Intergenic	Intergenic	-16127	LOC115721928	LOC115721928	XM_030651033	probable potassium transporter 17	protein_coding	-0.353475897	1	1	1.130241789	0.730430604	1
0.0003448811868833939	NC_044372.1	9360401	9361399	+	40.7468	998	Intergenic	Intergenic	-8086	LOC115708855	LOC115708855	XR_004010084	uncharacterized LOC115708855	lncRNA	NA	NA	NA	NA	NA	NA
0.001371559673416074-2	NC_044378.1	25394801	25395799	+	40.7468	998	Intergenic	Intergenic	33335	LOC115696451	LOC115696451	XM_030623352	uncharacterized mitochondrial protein AtMg00810-like	protein_coding	NA	NA	NA	NA	NA	NA
0.0007873305474493323-2	NC_044375.1	87168401	87169999	+	40.7468	1598	Intergenic	Intergenic	-29824	LOC115719463	LOC115719463	XM_030648524	trans-cinnamate 4-monooxygenase	protein_coding	-0.468455173	1	1	-0.837675081	1	1
0.0004194950606377708	NC_044378.1	30201401	30203799	+	40.7468	2398	Intergenic	Intergenic	-6638	LOC115696477	LOC115696477	XM_030623377	uncharacterized LOC115696477	protein_coding	NA	NA	NA	NA	NA	NA
0.0011699000688099083	NC_044370.1	22427601	22429599	+	40.7468	1998	Intergenic	Intergenic	-6716	LOC115707019	LOC115707019	XM_030634819	probable leucine-rich repeat receptor-like protein kinase At1g68400	protein_coding	4.30096023	0.000109556	0.001098586	0.644720678	1	1
3.815114751172879e-06	NC_044377.1	41533201	41535799	+	40.7468	2598	Intergenic	Intergenic	50685	LOC115694827	LOC115694827	XR_004007481	uncharacterized LOC115694827	lncRNA	-2.172132736	0.346774962	1	1.031168748	0.983224038	1
0.0023061484234464325-5	NC_044378.1	34748801	34749999	+	40.7468	1198	Intergenic	Intergenic	27237	LOC115696521	LOC115696521	XM_030623419	uncharacterized LOC115696521	protein_coding	NA	NA	NA	NA	NA	NA
0.0016085992745764938-3	NC_044375.1	46042401	46043199	+	40.7468	798	Intergenic	Intergenic	27938	LOC115720127	LOC115720127	XM_030649288	uncharacterized LOC115720127	protein_coding	NA	NA	NA	NA	NA	NA
0.001545693459349405	NC_044371.1	48365601	48367399	+	40.7468	1798	Intergenic	Intergenic	15957	LOC115706866	LOC115706866	XM_030634625	probable lactoylglutathione lyase, chloroplastic	protein_coding	1.342570993	0.087799039	0.397400738	0.98497268	1	1
0.00020762578413982026-2	NC_044379.1	5443401	5445199	+	40.7468	1798	Intergenic	Intergenic	-158180	LOC115701194	LOC115701194	XM_030628916	39S ribosomal protein L28, mitochondrial	protein_coding	-0.02710153	1	1	0.292764956	1	1
0.00010728658792134971	NC_044375.1	24759201	24761799	+	40.7468	2598	Intergenic	Intergenic	-17004	LOC115719965	LOC115719965	XM_030649136	uncharacterized LOC115719965	protein_coding	NA	NA	NA	NA	NA	NA
4.417851297195062e-08	NC_044370.1	62221401	62226399	+	40.7468	4998	intron	-intron (LOC115722981, intron 3 of 3)	3570	LOC115722981	LOC115722981	XM_030652376	uncharacterized LOC115722981	protein_coding	NA	NA	NA	NA	NA	NA
0.00014074332470146158	NC_044374.1	62363401	62365799	+	40.7468	2398	Intergenic	Intergenic	14838	LOC115717226	LOC115717226	XM_030646198	trihelix transcription factor GT-3a	protein_coding	-1.564933653	0.051175102	0.253019285	-1.307358548	0.290318494	1
0.0009594836710318845	NC_044371.1	73004201	73005799	+	40.7468	1598	Intergenic	Intergenic	-24610	LOC115705647	LOC115705647	XM_030633048	uncharacterized LOC115705647	protein_coding	-5.201801847	5.49105E-15	2.25544E-13	-3.606082054	1.45428E-06	3.36004E-05
0.0005104597777394823	NC_044377.1	52465801	52467399	+	40.7468	1598	Intergenic	Intergenic	131202	LOC115696088	LOC115696088	XR_004007686	small nucleolar RNA R71	snoRNA	NA	NA	NA	NA	NA	NA
0.0005743702377904195	NC_044377.1	31551001	31552799	+	40.7468	1798	Intergenic	Intergenic	-23576	LOC115725207	LOC115725207	XM_030654645	probable galacturonosyltransferase 12	protein_coding	-1.651089012	0.453254304	1	-3.943157279	0.000647383	0.00808094
0.0004033680787890951-3	NC_044374.1	20271801	20273799	+	40.7468	1998	intron	-intron (LOC115717633, intron 1 of 1)	11308	LOC115717633	LOC115717633	XM_030646617	uncharacterized LOC115717633	protein_coding	NA	NA	NA	NA	NA	NA
0.00024265091916681858	NC_044372.1	2430801	2432599	+	40.7468	1798	Intergenic	Intergenic	-5463	LOC115709270	LOC115709270	XM_030637330	probable myosin light chain kinase DDB_G0279831	protein_coding	1.18996806	0.401862637	1	0.563721042	1	1
0.0021283297036301086	NC_044370.1	57724001	57725599	+	40.7468	1598	Intergenic	Intergenic	56708	LOC115703464	LOC115703464	XR_004009226	small nucleolar RNA R71	snoRNA	NA	NA	NA	NA	NA	NA
0.0012666639964242906	NC_044371.1	11894001	11895199	+	40.7468	1198	Intergenic	Intergenic	-23790	LOC115706853	LOC115706853	XM_030634610	serine/threonine-protein kinase TOR-like	protein_coding	-0.608897815	1	1	-0.064869472	1	1
0.00045373142153457794	NC_044373.1	55288001	55289399	+	40.7468	1398	Intergenic	Intergenic	-49132	LOC115714572	LOC115714572	XR_004011079	uncharacterized LOC115714572	lncRNA	-2.082512083	0.193519856	0.749945517	-0.800741062	1	1
0.0007275555433231837	NC_044372.1	55877201	55879399	+	40.7468	2198	Intergenic	Intergenic	2091	LOC115711787	LOC115711787	XR_004010662	small nucleolar RNA R71	snoRNA	NA	NA	NA	NA	NA	NA
0.0009222390939632793-3	NC_044377.1	38139201	38141199	+	40.7468	1998	Intergenic	Intergenic	-2874	LOC115696017	LOC115696017	XR_004007619	small nucleolar RNA R71	snoRNA	NA	NA	NA	NA	NA	NA
0.0001521089805912635-2	NC_044378.1	53829401	53831599	+	40.7468	2198	Intergenic	Intergenic	-75850	LOC115698394	LOC115698394	XR_004008143	small nucleolar RNA R71	snoRNA	NA	NA	NA	NA	NA	NA
0.00047189535674457237	NC_044373.1	6583601	6585199	+	40.7468	1598	Intergenic	Intergenic	6394	LOC115714062	LOC115714062	XM_030642595	3-oxoacyl-[acyl-carrier-protein] reductase 4	protein_coding	-1.827048622	0.34987682	1	-8.694059101	1.79084E-19	2.20675E-17
0.0014852849505544367-2	NC_044374.1	57376201	57377799	+	40.7468	1598	Intergenic	Intergenic	-109278	LOC115718311	LOC115718311	XR_004011890	small nucleolar RNA R71	snoRNA	NA	NA	NA	NA	NA	NA
2.0671722873210415e-07	NC_044375.1	38449401	38453599	+	40.7468	4198	Intergenic	Intergenic	-92089	LOC115721222	LOC115721222	XM_030650479	uncharacterized LOC115721222	protein_coding	0.091652333	1	1	0.30087518	1	1
0.0014272726538560316	NC_044373.1	51925001	51926599	+	40.7468	1598	Intergenic	Intergenic	-42743	LOC115712298	LOC115712298	XM_030640558	transcription factor bHLH130,	protein_coding	0.382177515	1	1	0.488554175	1	1
0.0002727852118036166-3	NC_044377.1	42836801	42838599	+	40.7468	1798	Intergenic	Intergenic	51273	LOC115695200	LOC115695200	XM_030622285	uncharacterized LOC115695200	protein_coding	NA	NA	NA	NA	NA	NA
7.28708693260093e-05	NC_044374.1	21255001	21257999	+	40.7468	2998	Intergenic	Intergenic	-5635	LOC115717642	LOC115717642	XM_030646625	uncharacterized LOC115717642	protein_coding	NA	NA	NA	NA	NA	NA
0.0010386123942623924-3	NC_044374.1	59254001	59256199	+	40.7468	2198	Intergenic	Intergenic	-5476	LOC115715854	LOC115715854	XR_004011466	uncharacterized LOC115715854	lncRNA	NA	NA	NA	NA	NA	NA
0.00013538550321980287	NC_044373.1	51096001	51098599	+	40.7468	2598	Intergenic	Intergenic	-778045	LOC115715396	LOC115715396	XR_004011270	small nucleolar RNA R71	snoRNA	NA	NA	NA	NA	NA	NA
0.0016741078779280267-2	NC_044375.1	6603001	6604599	+	40.7468	1598	Intergenic	Intergenic	-2776	LOC115719819	LOC115719819	XM_030649008	uncharacterized LOC115719819	protein_coding	NA	NA	NA	NA	NA	NA
0.00047189535674457237-3	NC_044379.1	15049801	15051799	+	40.7468	1998	Intergenic	Intergenic	-29964	LOC115699877	LOC115699877	XM_030627419	uncharacterized LOC115699877	protein_coding	NA	NA	NA	NA	NA	NA
0.00023337151788909932	NC_044372.1	68735601	68737799	+	40.7468	2198	Intergenic	Intergenic	-9546	LOC115710169	LOC115710169	XR_004010362	uncharacterized LOC115710169	lncRNA	-1.418428765	0.348874812	1	0.025229424	1	1
0.0003878673380083741	NC_044372.1	49869801	49871799	+	40.7468	1998	Intergenic	Intergenic	-11508	LOC115709444	LOC115709444	XM_030637555	serine/threonine-protein kinase SRPK,	protein_coding	0.981724287	1	1	0.775461552	1	1
0.0009222390939632793-4	NC_044379.1	35114001	35115599	+	40.7468	1598	Intergenic	Intergenic	33046	LOC115699309	LOC115699309	XM_030626650	receptor-like protein 4	protein_coding	0.134571944	1	1	0.322416692	1	1
6.179071917913724e-07	NC_044371.1	37432801	37436999	+	40.7468	4198	Intergenic	Intergenic	-3475	LOC115706479	LOC115706479	XM_030634139	methylthioribose-1-phosphate isomerase	protein_coding	0.073724236	1	1	0.476454287	1	1
0.0001521089805912635	NC_044373.1	28400001	28402799	+	40.7468	2798	Intergenic	Intergenic	35391	LOC115714559	LOC115714559	XM_030643294	ras-related protein RABA4c	protein_coding	-1.078264855	0.741394842	1	-0.826719066	1	1
1.010593103368026e-06	NC_044370.1	40129201	40130999	+	40.7468	1798	Intergenic	Intergenic	-8551	LOC115710739	LOC115710739	XM_030639095	putative invertase inhibitor	protein_coding	-0.816863134	1	1	-2.848248327	0.076060748	0.426895112
0.0007275555433231837-2	NC_044372.1	68078201	68079999	+	40.7468	1798	Intergenic	Intergenic	68984	LOC115710882	LOC115710882	XM_030639235	uncharacterized LOC115710882	protein_coding	NA	NA	NA	NA	NA	NA
5.582948301998927e-06	NC_044378.1	66427001	66429799	+	40.7468	2798	exon	-exon (LOC115696750, exon 3 of 5)	921	LOC115696750	LOC115696750	XM_030623636	uncharacterized LOC115696750	protein_coding	NA	NA	NA	NA	NA	NA
0.0014852849505544367	NC_044374.1	39260601	39262199	+	40.7468	1598	Intergenic	Intergenic	54698	LOC115717747	LOC115717747	XM_030646726	zinc finger BED domain-containing protein DAYSLEEPER-like	protein_coding	NA	NA	NA	NA	NA	NA
0.0002836478815120012	NC_044372.1	30894201	30895599	+	40.7468	1398	Intergenic	Intergenic	61474	LOC115708733	LOC115708733	XM_030636735	protein Hikeshi	protein_coding	-0.512415042	1	1	0.343833656	1	1
0.0021283297036301086-2	NC_044372.1	34879201	34880399	+	40.7468	1198	Intergenic	Intergenic	-10309	LOC115711240	LOC115711240	XM_030639572	40S ribosomal protein S13	protein_coding	-0.580904179	1	1	0.131981732	1	1
0.00031892896394936164-2	NC_044379.1	8051001	8053399	+	40.7468	2398	Intergenic	Intergenic	-22464	LOC115700922	LOC115700922	XM_030628597	probable serine/threonine-protein kinase PIX7	protein_coding	0.248665937	1	1	0.355277415	1	1
0.00014631494409337003	NC_044374.1	25111601	25112799	+	40.7468	1198	Intergenic	Intergenic	-41384	LOC115715930	LOC115715930	XM_030644612	CEN-like protein 1	protein_coding	9.152171554	3.304E-122	1.0586E-118	2.86224619	4.62461E-11	2.16826E-09
8.182815306002877e-05	NC_044376.1	29542801	29544999	+	40.7468	2198	Intergenic	Intergenic	-7535	LOC115723150	LOC115723150	XM_030652585	probable prefoldin subunit 5	protein_coding	0.064301503	1	1	0.433939059	1	1
0.0012666639964242906-2	NC_044375.1	72348001	72349999	+	40.7468	1998	Intergenic	Intergenic	-101977	LOC115718551	LOC115718551	XM_030647352	ankyrin repeat-containing protein ITN1-like,	protein_coding	NA	NA	NA	NA	NA	NA
2.417685411476284e-06	NC_044375.1	58836401	58840399	+	40.7468	3998	Intergenic	Intergenic	6485	LOC115721184	LOC115721184	XR_004012399	uncharacterized LOC115721184	lncRNA	-0.376448179	1	1	0.523994116	1	1
0.00012051362339455446	NC_044377.1	36044601	36047399	+	40.7468	2798	Intergenic	Intergenic	18448	LOC115724572	LOC115724572	XM_030653883	cytochrome P450 71D9,	protein_coding	2.187328289	0.017571973	0.101012569	2.728137871	0.000664043	0.008245947
0.00019207287487842597	NC_044371.1	43803601	43805799	+	40.7468	2198	Intergenic	Intergenic	8092	LOC115708509	LOC115708509	XR_004010004	small nucleolar RNA snR46	snoRNA	NA	NA	NA	NA	NA	NA
5.114830180827323e-07	NC_044377.1	4789401	4792599	+	40.7468	3198	TTS	-TTS (LOC115694889)	1728	LOC115694889	LOC115694889	XM_030621993	uncharacterized LOC115694889	protein_coding	NA	NA	NA	NA	NA	NA
9.929090844618094e-05	NC_044378.1	52772401	52775399	+	40.7468	2998	Intergenic	Intergenic	-3671	LOC115696648	LOC115696648	XM_030623539	uncharacterized LOC115696648	protein_coding	NA	NA	NA	NA	NA	NA
0.001217306917613028-2	NC_044377.1	71940601	71942199	+	40.7468	1598	Intergenic	Intergenic	37669	LOC115725224	LOC115725224	XM_030654668	auxin-responsive protein SAUR50	protein_coding	-2.271012104	0.014904541	0.087822667	0.320688342	1	1
0.0016741078779280267	NC_044373.1	9582401	9584199	+	40.7468	1798	Intergenic	Intergenic	-27570	LOC115712131	LOC115712131	XM_030640370	uncharacterized LOC115712131,	protein_coding	-0.155176768	1	1	-0.126083252	1	1
4.9545909076466794e-05	NC_044372.1	54338601	54341599	+	40.7468	2998	Intergenic	Intergenic	-10397	LOC115709004	LOC115709004	XM_030637024	probable calcium-binding protein CML15	protein_coding	-1.256071342	0.862820203	1	-4.76690713	0.006653664	0.057536385
1.5877804219011815e-07	NC_044378.1	34286201	34290399	+	40.7468	4198	Intergenic	Intergenic	-64662	LOC115698290	LOC115698290	XM_030625504	organelle RRM domain-containing protein 6, chloroplastic	protein_coding	0.972473404	1	1	0.98410267	1	1
0.002044717418485641	NC_044373.1	49622201	49623999	+	40.7468	1798	intron	-intron (LOC115713492, intron 1 of 2)	13784	LOC115713492	LOC115713492	XM_030641976	uncharacterized LOC115713492	protein_coding	NA	NA	NA	NA	NA	NA
0.0003878673380083741-2	NC_044376.1	53488201	53489399	+	40.7468	1198	Intergenic	Intergenic	-387913	LOC115724262	LOC115724262	XR_004013061	small nucleolar RNA R71	snoRNA	NA	NA	NA	NA	NA	NA
0.00019969665452825646-2	NC_044373.1	62943001	62944399	+	40.7468	1398	Intergenic	Intergenic	-101452	LOC115712036	LOC115712036	XM_030640243	probable LRR receptor-like serine/threonine-protein kinase At2g16250,	protein_coding	-1.306948597	0.047519973	0.23689742	-1.204207477	0.188574442	0.86090885
0.00019207287487842597-3	NC_044376.1	43108801	43110999	+	40.7468	2198	Intergenic	Intergenic	2971	LOC115723848	LOC115723848	XM_030653314	uncharacterized LOC115723848	protein_coding	NA	NA	NA	NA	NA	NA
3.0046998066407302e-05	NC_044371.1	46039801	46041799	+	40.7468	1998	Intergenic	Intergenic	8002	LOC115708145	LOC115708145	XM_030636356	uncharacterized LOC115708145,	protein_coding	-0.333507392	1	1	-1.7770592	0.003458931	0.033096585
0.00033164879563715434	NC_044377.1	53932801	53934799	+	40.7468	1998	Intergenic	Intergenic	-5406	LOC115695268	LOC115695268	XM_030622346	uncharacterized LOC115695268	protein_coding	NA	NA	NA	NA	NA	NA
0.0002727852118036166	NC_044373.1	6912601	6914399	+	40.7468	1798	Intergenic	Intergenic	-4276	LOC115714993	LOC115714993	XM_030643772	serine/threonine protein phosphatase 2A 59 kDa regulatory subunit B' eta isoform	protein_coding	-0.684089099	1	1	-0.19840392	1	1
4.086857921745773e-05	NC_044372.1	61663601	61666199	+	40.7468	2598	Intergenic	Intergenic	-20321	LOC115709814	LOC115709814	XM_030638044	formin-like protein 20,	protein_coding	-0.055229222	1	1	-0.205600083	1	1
0.0021283297036301086-4	NC_044374.1	61146401	61147599	+	40.7468	1198	Intergenic	Intergenic	-107578	LOC115717880	LOC115717880	XM_030646850	uncharacterized LOC115717880	protein_coding	NA	NA	NA	NA	NA	NA
0.0003729682128650683	NC_044377.1	52598001	52600599	+	40.7468	2598	promoter-TSS	-promoter-TSS (LOC115696088)	-1498	LOC115696088	LOC115696088	XR_004007686	small nucleolar RNA R71	snoRNA	NA	NA	NA	NA	NA	NA
8.840796937797619e-05	NC_044371.1	29845201	29847799	+	40.7468	2598	Intergenic	Intergenic	30910	LOC115705204	LOC115705204	XR_004009415	uncharacterized LOC115705204	lncRNA	NA	NA	NA	NA	NA	NA
5.351596001296865e-05	NC_044377.1	30085401	30088799	+	40.7468	3398	Intergenic	Intergenic	-71761	LOC115725587	LOC115725587	XM_030655163	uncharacterized LOC115725587	protein_coding	1.472385203	0.049817344	0.247005106	0.642216525	1	1
0.0010386123942623924	NC_044372.1	7664201	7664999	+	40.7468	798	Intergenic	Intergenic	-5895	LOC115711815	LOC115711815	XR_004010685	small nucleolar RNA R71	snoRNA	NA	NA	NA	NA	NA	NA
0.0005522140462875932	NC_044379.1	2183801	2185399	+	40.7468	1598	Intergenic	Intergenic	-605189	LOC115698919	LOC115698919	XM_030626122	extracellular ribonuclease LE	protein_coding	-2.667802986	0.007814691	0.050323215	-6.151631711	1.46512E-17	1.49016E-15
0.00031892896394936164	NC_044372.1	63637001	63639199	+	40.7468	2198	Intergenic	Intergenic	-40201	LOC115711668	LOC115711668	XM_030640042	T-complex protein 1 subunit delta	protein_coding	-0.225571911	1	1	0.39984035	1	1
0.0007275555433231837-4	NC_044379.1	34569401	34571999	+	40.7468	2598	Intergenic	Intergenic	17582	LOC115700041	LOC115700041	XM_030627593	uncharacterized LOC115700041	protein_coding	-1.133689091	0.957449977	NA	-1.368483961	0.882351814	NA
0.0003878673380083741-3	NC_044378.1	43969401	43970999	+	40.7468	1598	Intergenic	Intergenic	47116	LOC115696589	LOC115696589	XM_030623482	uncharacterized LOC115696589	protein_coding	NA	NA	NA	NA	NA	NA
0.00019207287487842597-2	NC_044376.1	8549601	8551199	+	40.7468	1598	Intergenic	Intergenic	-3246	LOC115724284	LOC115724284	XR_004013082	small nucleolar RNA R71	snoRNA	NA	NA	NA	NA	NA	NA
1.970127371223617e-05	NC_044371.1	24984401	24987799	+	40.7468	3398	Intergenic	Intergenic	-40818	LOC115705894	LOC115705894	XM_030633349	ninja-family protein AFP3	protein_coding	0.655348849	1	1	2.22031924	7.87519E-05	0.001256306
0.0021283297036301086-3	NC_044372.1	70914001	70915799	+	40.7468	1798	Intergenic	Intergenic	-4097	LOC115708858	LOC115708858	XM_030636875	uncharacterized LOC115708858	protein_coding	0.566713965	1	1	-2.265827353	6.66467E-07	1.65952E-05
0.0012666639964242906-3	NC_044378.1	38163601	38164799	+	40.7468	1198	Intergenic	Intergenic	-22485	LOC115698027	LOC115698027	XR_004008021	uncharacterized LOC115698027	lncRNA	0	1	NA	-3.326751962	0.485942891	NA
0.0008520843498616807	NC_044370.1	95171601	95172999	+	40.7468	1398	intron	-intron (LOC115698548, intron 5 of 12)	1718	LOC115698548	LOC115698548	XM_030625634	synaptotagmin-2	protein_coding	-0.494337298	1	1	-0.804783376	1	1
0.0007275555433231837-3	NC_044376.1	32304201	32306399	+	40.7468	2198	Intergenic	Intergenic	6982	LOC115722874	LOC115722874	XM_030652221	magnesium transporter MRS2-2,	protein_coding	0.231086703	1	1	0.35994267	1	1
0.0018133785087020157	NC_044375.1	34540401	34541599	+	40.7468	1198	promoter-TSS	-promoter-TSS (LOC115719562)	-1533	LOC115719562	LOC115719562	XM_030648656	uncharacterized LOC115719562	protein_coding	-1.866023671	0.104300668	0.457651619	-2.033501462	0.051668401	0.31341801
0.00019969665452825646	NC_044372.1	15394801	15396199	+	40.7468	1398	Intergenic	Intergenic	-75334	LOC115710472	LOC115710472	XM_030638833	uncharacterized LOC115710472	protein_coding	-0.059861929	1	NA	-1.167181664	0.936955752	NA
0.0009222390939632793	NC_044373.1	61715401	61717799	+	40.7468	2398	Intergenic	Intergenic	9642	LOC115713557	LOC115713557	XM_030642041	uncharacterized protein K02A2.6-like	protein_coding	NA	NA	NA	NA	NA	NA
0.0017423293362462124	NC_044370.1	73775401	73776999	+	40.7468	1598	Intergenic	Intergenic	155604	LOC115703363	LOC115703363	XR_004009135	small nucleolar RNA R71	snoRNA	NA	NA	NA	NA	NA	NA
0.0016741078779280267-3	NC_044376.1	55489401	55491199	+	40.7468	1798	Intergenic	Intergenic	-14035	LOC115722808	LOC115722808	XM_030652135	plant UBX domain-containing protein 7,	protein_coding	-0.161435589	1	1	0.039430096	1	1
0.002044717418485641-2	NC_044378.1	8050401	8052199	+	40.7468	1798	Intergenic	Intergenic	-19299	LOC115697100	LOC115697100	XM_030624006	calcium-dependent protein kinase 13	protein_coding	-0.133648799	1	1	0.070077565	1	1
0.0005522140462875932-2	NW_022060514.1	10001	11599	+	40.7468	1598	NA	NA	NA	NA			#N/A		NA	NA	NA	NA	NA	NA
0.001217306917613028	NC_044370.1	56104401	56105999	+	40.7468	1598	Intergenic	Intergenic	9589	LOC115702312	LOC115702312	XM_030629760	uncharacterized LOC115702312	protein_coding	-0.37438412	1	NA	-0.410947537	1	NA
0.000646386951709882	NC_044374.1	74683001	74685199	+	40.7468	2198	Intergenic	Intergenic	-13152	LOC115716969	LOC115716969	XM_030645897	uncharacterized LOC115716969,	protein_coding	NA	NA	NA	NA	NA	NA
3.203888010534311e-09	NC_044372.1	32146401	32149799	+	40.7468	3398	Intergenic	Intergenic	-63384	LOC115709282	LOC115709282	XM_030637350	phenylalanine ammonia-lyase	protein_coding	-0.481696746	1	1	-1.4568747	0.059712269	0.352425223
4.086857921745773e-05-2	NC_044378.1	48536801	48539799	+	40.7468	2998	Intergenic	Intergenic	-106587	LOC115696617	LOC115696617	XM_030623511	uncharacterized LOC115696617	protein_coding	NA	NA	NA	NA	NA	NA
0.0002727852118036166-2	NC_044374.1	24282601	24284599	+	40.7468	1998	Intergenic	Intergenic	8945	LOC115716877	LOC115716877	XM_030645789	probable protein phosphatase 2C 74	protein_coding	0.522806305	1	1	-3.265876228	0.01624152	0.120660217
9.189517692917079e-05	NC_044372.1	47936801	47939599	+	40.7468	2798	Intergenic	Intergenic	-55048	LOC115710738	LOC115710738	XM_030639092	uncharacterized LOC115710738	protein_coding	NA	NA	NA	NA	NA	NA
0.00047189535674457237-2	NC_044375.1	58556401	58557999	+	40.7468	1598	Intergenic	Intergenic	-20097	LOC115720224	LOC115720224	XM_030649381	uncharacterized LOC115720224	protein_coding	NA	NA	NA	NA	NA	NA
0.0010386123942623924-2	NC_044374.1	40287601	40289199	+	40.7468	1598	Intergenic	Intergenic	25554	LOC115716800	LOC115716800	XM_030645704	GMP synthase [glutamine-hydrolyzing]	protein_coding	0.361732794	1	1	0.717274458	1	1
0.0018133785087020157-2	NC_044378.1	25882201	25883399	+	40.7468	1198	Intergenic	Intergenic	-34156	LOC115696909	LOC115696909	XM_030623809	inactive tetrahydrocannabinolic acid synthase-like	protein_coding	NA	NA	NA	NA	NA	NA
3.932581228059396e-05	NC_044374.1	83201601	83204999	+	40.7468	3398	Intergenic	Intergenic	-11826	LOC115718155	LOC115718155	XM_030647115	uncharacterized LOC115718155	protein_coding	-8.552949932	9.92707E-08	1.66808E-06	-2.010048505	0.494443607	1
0.0009222390939632793-2	NC_044374.1	34651201	34652999	+	40.7468	1798	Intergenic	Intergenic	-5720	LOC115717318	LOC115717318	XM_030646286	uncharacterized LOC115717318	protein_coding	-0.573430037	1	1	-0.610166108	1	1
0.0017423293362462124-2	NC_044375.1	2884801	2886199	+	40.7468	1398	Intergenic	Intergenic	-25067	LOC115721243	LOC115721243	XR_004012412	uncharacterized LOC115721243	lncRNA	NA	NA	NA	NA	NA	NA
0.0014852849505544367-3	NC_044375.1	13010401	13011999	+	40.7468	1598	Intergenic	Intergenic	-138327	LOC115719864	LOC115719864	XM_030649044	serine/arginine-rich splicing factor 11-like	protein_coding	NA	NA	NA	NA	NA	NA
0.0006214188113681862	NC_044370.1	61082001	61084399	+	40.7468	2398	Intergenic	Intergenic	-64227	LOC115703384	LOC115703384	XR_004009152	U6 spliceosomal RNA	snRNA	NA	NA	NA	NA	NA	NA
0.0008864588258765651	NC_044377.1	72494601	72496399	+	40.7468	1798	Intergenic	Intergenic	22373	LOC115695967	LOC115695967	XR_004007591	uncharacterized LOC115695967	lncRNA	0	1	1	-5.952813637	0.004191343	0.039149746
2.3865111457472747e-05	NC_044377.1	66347601	66350999	+	40.7468	3398	Intergenic	Intergenic	62593	LOC115695670	LOC115695670	XM_030622730	receptor protein-tyrosine kinase CEPR1	protein_coding	0.57411018	1	1	1.586716997	0.06121731	0.359541811
0.0004362739346990182	NC_044370.1	58145201	58147599	+	40.7468	2398	Intergenic	Intergenic	28902	LOC115712842	LOC115712842	XM_030641234	growth-regulating factor 1	protein_coding	3.190581489	0.022872739	0.126819341	-1.850957483	0.192440073	0.875194214
4.442423041504919e-06	NC_044371.1	24215201	24217799	+	40.7468	2598	Intergenic	Intergenic	-47140	LOC115703915	LOC115703915	XM_030631150	uncharacterized LOC115703915	protein_coding	NA	NA	NA	NA	NA	NA
3.2447089910920976e-05	NC_044372.1	52972201	52974399	+	40.7468	2198	Intergenic	Intergenic	73264	LOC115711878	LOC115711878	XR_004010746	small nucleolar RNA R71	snoRNA	NA	NA	NA	NA	NA	NA
0.001080626482365922	NC_044370.1	14480601	14481999	+	40.7468	1398	Intergenic	Intergenic	-9727	LOC115703648	LOC115703648	XM_030630890	RAN GTPase-activating protein 1	protein_coding	-0.894080937	1	1	-0.40821694	1	1
1.654085384549187e-06	NC_044370.1	75723801	75726399	+	40.7468	2598	Intergenic	Intergenic	159272	LOC115714587	LOC115714587	XM_030643333	probable protein phosphatase 2C 60	protein_coding	-0.171316991	1	1	0.132704095	1	1
9.773108675444764e-28	NC_044379.1	3550801	3568599	+	40.6577	17798	TTS	-TTS (LOC115701760)	-2504	LOC115701759	LOC115701759	XR_004008745	18S ribosomal RNA	rRNA	-0.402061107	1	1	-0.757057781	1	1
4.380877421456347e-08	NC_044374.1	16163201	16165799	+	40.382	2598	Intergenic	Intergenic	105127	LOC115717603	LOC115717603	XM_030646587	uncharacterized LOC115717603	protein_coding	NA	NA	NA	NA	NA	NA
5.489017529340502e-08	NC_044376.1	1707001	1712399	+	40.3764	5398	Intergenic	Intergenic	-8344	LOC115722475	LOC115722475	XM_030651692	#N/A	protein_coding	-0.337475025	1	1	-0.488574744	1	1
1.3042058119790667e-07	NC_044376.1	53230001	53234399	+	40.3531	4398	Intergenic	Intergenic	-465336	LOC115724380	LOC115724380	XR_004013173	small nucleolar RNA R71	snoRNA	NA	NA	NA	NA	NA	NA
1.3065853150322295e-06	NC_044378.1	16224801	16228199	+	40.2745	3398	Intergenic	Intergenic	27658	LOC115697355	LOC115697355	XM_030624325	protein CHROMATIN REMODELING 4,	protein_coding	0.145110842	1	1	0.095876606	1	1
1.463968052728391e-06	NC_044377.1	71134801	71138399	+	40.2698	3598	Intergenic	Intergenic	-4625	LOC115695989	LOC115695989	XM_030623105	#N/A	protein_coding	1.730230138	0.288417175	1	-3.685028366	1.16449E-05	0.000227722
3.642366833815484e-06	NC_044379.1	16536201	16537999	+	40.2287	1798	Intergenic	Intergenic	-5567	LOC115699887	LOC115699887	XM_030627429	GDSL esterase/lipase At1g71691-like	protein_coding	NA	NA	NA	NA	NA	NA
3.930350541339638e-06	NC_044373.1	7270001	7273199	+	40.225	3198	Intergenic	Intergenic	-9483	LOC115714718	LOC115714718	XR_004011107	uncharacterized LOC115714718	lncRNA	-3.006521973	0.000110373	0.001105628	0.437303626	1	1
6.207655236051829e-06	NC_044372.1	12661801	12665199	+	40.2013	3398	Intergenic	Intergenic	20285	LOC115710444	LOC115710444	XM_030638809	peroxidase 41-like	protein_coding	NA	NA	NA	NA	NA	NA
9.091447324883288e-06	NC_044375.1	32334001	32337199	+	40.1799	3198	Intergenic	Intergenic	-49168	LOC115718786	LOC115718786	XM_030647612	AT-hook motif nuclear-localized protein 19	protein_coding	-0.191686572	1	NA	0.550842823	1	NA
9.445370120455692e-06	NC_044374.1	56507801	56510399	+	40.1777	2598	Intergenic	Intergenic	-68638	LOC115716452	LOC115716452	XM_030645253	xyloglucan galactosyltransferase XLT2-like	protein_coding	0.387685935	1	1	-0.464711161	1	1
1.0195289520453601e-05	NC_044374.1	10018401	10022599	+	40.1731	4198	exon	-exon (LOC115717543, exon 1 of 1)	1331	LOC115717543	LOC115717543	XM_030646529	uncharacterized LOC115717543	protein_coding	NA	NA	NA	NA	NA	NA
1.6763584469466645e-05	NC_044372.1	54438401	54441599	+	40.1419	3198	Intergenic	Intergenic	-27934	LOC115711217	LOC115711217	XM_030639544	uncharacterized LOC115711217	protein_coding	-3.005715926	0.390655211	1	-1.38150273	0.874189228	1
1.809838346296751e-05	NC_044375.1	40389801	40392199	+	40.1367	2398	Intergenic	Intergenic	12511	LOC115718449	LOC115718449	XM_030647232	heat stress transcription factor B-4d	protein_coding	-6.655778964	0.000512205	0.00451864	-2.933776522	0.261186514	1
2.192198973130159e-05	NC_044370.1	8028001	8030999	+	40.1236	2998	Intergenic	Intergenic	-10449	LOC115702492	LOC115702492	XM_030629932	pathogenesis-related protein 1A-like	protein_coding	NA	NA	NA	NA	NA	NA
2.277918345284331e-05	NC_044373.1	45333801	45336999	+	40.1209	3198	exon	-exon (LOC115713455, exon 1 of 3)	228	LOC115713455	LOC115713455	XM_030641939	uncharacterized LOC115713455	protein_coding	1.549169232	0.892939793	NA	1.512629836	0.90002605	NA
2.3670082962850042e-05	NC_044375.1	83002001	83003999	+	40.1181	1998	Intergenic	Intergenic	-22187	LOC115718857	LOC115718857	XM_030647667	probable N-acetyltransferase HLS1	protein_coding	3.22001827	0.003469234	0.02463579	3.57636957	0.000946491	0.011148525
2.65586270316337e-05	NC_044374.1	80218401	80221399	+	40.1098	2998	Intergenic	Intergenic	20519	LOC115718044	LOC115718044	XM_030647009	uncharacterized LOC115718044	protein_coding	4.057200318	0.438958384	NA	4.020681802	0.444452785	NA
2.7598235401437945e-05	NC_044373.1	10309801	10311599	+	40.107	1798	Intergenic	Intergenic	-57580	LOC115715428	LOC115715428	XR_004011299	small nucleolar RNA R71	snoRNA	NA	NA	NA	NA	NA	NA
2.9801869046125977e-05	NC_044372.1	34483001	34485799	+	40.1013	2798	promoter-TSS	-promoter-TSS (LOC115711817)	-1895	LOC115711817	LOC115711817	XR_004010687	small nucleolar RNA R71	snoRNA	NA	NA	NA	NA	NA	NA
3.218253778355727e-05	NC_044379.1	20788001	20791599	+	40.0954	3598	Intergenic	Intergenic	-104005	LOC115701663	LOC115701663	XR_004008653	small nucleolar RNA R71	snoRNA	NA	NA	NA	NA	NA	NA
3.3443693287099656e-05	NW_022060476.1	931001	933599	+	40.0925	2598	Intergenic	Intergenic	200500	LOC115702188	LOC115702188	XM_030629636	#N/A	protein_coding	NA	NA	NA	NA	NA	NA
3.475456990552569e-05	NW_022060456.1	49601	50999	+	40.0895	1398	NA	NA	NA	NA			#N/A		NA	NA	NA	NA	NA	NA
4.2126717062621347e-05	NC_044370.1	41823801	41826799	+	40.0742	2998	Intergenic	Intergenic	-56686	LOC115703264	LOC115703264	XR_004009042	small nucleolar RNA R71	snoRNA	NA	NA	NA	NA	NA	NA
4.3780270407732756e-05	NC_044372.1	34690201	34692799	+	40.071	2598	Intergenic	Intergenic	17110	LOC115708691	LOC115708691	XR_004010062	uncharacterized LOC115708691,	lncRNA	-0.060719908	1	1	1.125349225	0.678883674	1
4.914336541363406e-05-2	NC_044374.1	52350001	52352799	+	40.0614	2798	Intergenic	Intergenic	-28684	LOC115717330	LOC115717330	XM_030646302	mitogen-activated protein kinase kinase kinase YODA,	protein_coding	0.047690917	1	1	0.192575664	1	1
4.914336541363406e-05	NC_044371.1	50004601	50006199	+	40.0614	1598	Intergenic	Intergenic	19062	LOC115706171	LOC115706171	XM_030633714	sugar transport protein 13-like	protein_coding	NA	NA	NA	NA	NA	NA
5.516810545286375e-05	NC_044378.1	47404401	47406599	+	40.0515	2198	Intergenic	Intergenic	60123	LOC115696613	LOC115696613	XM_030623507	uncharacterized LOC115696613	protein_coding	NA	NA	NA	NA	NA	NA
6.954222676650878e-05	NC_044377.1	48671001	48672799	+	40.0308	1798	Intergenic	Intergenic	4855	LOC115695230	LOC115695230	XM_030622309	uncharacterized LOC115695230	protein_coding	NA	NA	NA	NA	NA	NA
7.808867423596268e-05	NC_044374.1	23265601	23268799	+	40.02	3198	Intergenic	Intergenic	46042	LOC115717656	LOC115717656	XM_030646638	uncharacterized LOC115717656	protein_coding	NA	NA	NA	NA	NA	NA
8.116651709790817e-05	NC_044372.1	51794001	51796599	+	40.0163	2598	Intergenic	Intergenic	9327	LOC115710759	LOC115710759	XM_030639111	uncharacterized LOC115710759	protein_coding	NA	NA	NA	NA	NA	NA
8.436656425826041e-05	NC_044377.1	71427401	71430199	+	40.0126	2798	Intergenic	Intergenic	-4468	LOC115696120	LOC115696120	XR_004007715	small nucleolar RNA R71	snoRNA	NA	NA	NA	NA	NA	NA
9.11530527901945e-05	NC_044371.1	65685401	65687999	+	40.005	2598	Intergenic	Intergenic	-25745	LOC115706954	LOC115706954	XM_030634737	ferritin-3, chloroplastic	protein_coding	2.627140515	1.21165E-19	7.44141E-18	2.745267619	2.57041E-22	4.01715E-20
9.47498887739135e-05-2	NC_044371.1	69669601	69672399	+	40.0012	2798	promoter-TSS	-promoter-TSS (LOC115705526)	-976	LOC115705526	LOC115705526	XM_030632872	DEAD-box ATP-dependent RNA helicase 31	protein_coding	1.006982631	0.967261252	1	1.288458079	0.090621175	0.489748402
9.47498887739135e-05	NC_044371.1	24201601	24204199	+	40.0012	2598	Intergenic	Intergenic	-60740	LOC115703915	LOC115703915	XM_030631150	uncharacterized LOC115703915	protein_coding	NA	NA	NA	NA	NA	NA
9.848973491395105e-05	NC_044375.1	17980001	17982199	+	39.9973	2198	Intergenic	Intergenic	46314	LOC115719932	LOC115719932	XM_030649103	uncharacterized LOC115719932	protein_coding	NA	NA	NA	NA	NA	NA
9.848973491395105e-05-2	NC_044378.1	26383801	26386599	+	39.9973	2798	Intergenic	Intergenic	-137159	LOC115696454	LOC115696454	XM_030623356	uncharacterized LOC115696454	protein_coding	NA	NA	NA	NA	NA	NA
0.00010642164786045387	NC_044377.1	73217601	73219999	+	39.9894	2398	Intergenic	Intergenic	-26997	LOC115695473	LOC115695473	XM_030622536	uncharacterized LOC115695473	protein_coding	NA	NA	NA	NA	NA	NA
0.00011499756013638276	NC_044374.1	54478801	54481799	+	39.9814	2998	intron	-intron (LOC115717852, intron 1 of 2)	1477	LOC115717852	LOC115717852	XM_030646822	uncharacterized LOC115717852	protein_coding	NA	NA	NA	NA	NA	NA
0.00011954335315375828-2	NC_044377.1	25940201	25942399	+	39.9773	2198	Intergenic	Intergenic	-7032	LOC115724486	LOC115724486	XR_004013200	uncharacterized LOC115724486	lncRNA	-0.735521459	1	NA	-1.65216992	0.7814379	NA
1.2420563706150272e-07	NC_044370.1	73407401	73410799	+	39.9773	3398	Intergenic	Intergenic	49020	LOC115714372	LOC115714372	XM_030643054	protein transport protein Sec61 subunit alpha	protein_coding	-0.413755956	1	1	0.277384131	1	1
0.00011954335315375828	NC_044370.1	54434801	54437399	+	39.9773	2598	Intergenic	Intergenic	-24959	LOC115712195	LOC115712195	XM_030640449	ethylene-responsive transcription factor RAP2-1	protein_coding	-1.197600877	0.683581525	1	-0.944761586	1	1
1.2897182384488018e-07	NC_044372.1	67632401	67635999	+	39.9753	3598	Intergenic	Intergenic	-40053	LOC115709053	LOC115709053	XM_030637083	ankyrin repeat-containing protein ITN1	protein_coding	-1.490259553	0.671717631	1	-1.783931478	0.49733645	1
0.00012427028540401658	NC_044373.1	62315201	62318199	+	39.9732	2998	Intergenic	Intergenic	8238	LOC115713561	LOC115713561	XM_030642045	uncharacterized LOC115713561	protein_coding	NA	NA	NA	NA	NA	NA
0.00012918564655659646	NC_044378.1	48301401	48304199	+	39.969	2798	Intergenic	Intergenic	-122797	LOC115696615	LOC115696615	XM_030623510	uncharacterized LOC115696615	protein_coding	NA	NA	NA	NA	NA	NA
0.00015088783052157596	NC_044370.1	59829201	59831599	+	39.9519	2398	Intergenic	Intergenic	-19237	LOC115722709	LOC115722709	XM_030651988	uncharacterized LOC115722709	protein_coding	NA	NA	NA	NA	NA	NA
0.00016308205763275696	NC_044374.1	61842001	61842999	+	39.943	998	Intergenic	Intergenic	35392	LOC115716317	LOC115716317	XM_030645079	flowering locus K homology domain,	protein_coding	0.675064321	1	1	0.659173624	1	1
0.0001762706740991872	NC_044373.1	62322001	62324599	+	39.934	2598	Intergenic	Intergenic	14838	LOC115713561	LOC115713561	XM_030642045	uncharacterized LOC115713561	protein_coding	NA	NA	NA	NA	NA	NA
0.00018326324288685993-2	NC_044374.1	74652601	74654999	+	39.9294	2398	Intergenic	Intergenic	17148	LOC115716969	LOC115716969	XM_030645897	uncharacterized LOC115716969,	protein_coding	NA	NA	NA	NA	NA	NA
0.00018326324288685993	NC_044374.1	48287001	48288799	+	39.9294	1798	Intergenic	Intergenic	-69838	LOC115716933	LOC115716933	XM_030645855	#N/A	protein_coding	-1.047068222	0.912908824	1	-0.026240056	1	1
0.00019809931982886904	NC_044370.1	60122401	60124999	+	39.92	2598	Intergenic	Intergenic	25532	LOC115722751	LOC115722751	XM_030652053	uncharacterized LOC115722751	protein_coding	NA	NA	NA	NA	NA	NA
1.4863654578117787e-12	NC_044375.1	84954001	84962599	+	39.914	8598	Intergenic	Intergenic	-15495	LOC115720438	LOC115720438	XM_030649587	uncharacterized LOC115720438	protein_coding	NA	NA	NA	NA	NA	NA
3.7068024635272165e-07	NC_044376.1	5537001	5541199	+	39.9128	4198	Intergenic	Intergenic	-8800	LOC115721870	LOC115721870	XM_030650960	sucrose synthase 2,	protein_coding	-1.332037069	0.712365408	1	-3.026354715	0.02271352	0.159468799
0.00024071553223596658	NC_044372.1	78955401	78957599	+	39.8956	2198	Intergenic	Intergenic	-15427	LOC115708912	LOC115708912	XM_030636937	pentatricopeptide repeat-containing protein At1g06143	protein_coding	-0.092525171	1	1	-0.078727878	1	1
4.828592212799638e-07	NC_044373.1	72646601	72652599	+	39.8956	5998	Intergenic	Intergenic	9875	LOC115714329	LOC115714329	XM_030642992	MADS-box protein JOINTLESS	protein_coding	-0.213929607	1	1	3.659567811	8.64075E-05	0.001362601
0.00026025239361244953	NC_044373.1	49979201	49981199	+	39.8854	1998	Intergenic	Intergenic	9036	LOC115714367	LOC115714367	XM_030643044	nitrate regulatory gene2 protein	protein_coding	-1.706663402	0.090181438	0.405795361	-2.122382195	0.006823839	0.058849109
0.0002706134272824282	NC_044371.1	24620801	24622999	+	39.8803	2198	Intergenic	Intergenic	-20887	LOC115705426	LOC115705426	XM_030632760	protein LIKE COV 1	protein_coding	-0.643049486	1	1	-0.275469838	1	1
0.00028139102534534635	NC_044372.1	23191201	23192399	+	39.875	1198	Intergenic	Intergenic	-2703	LOC115709662	LOC115709662	XM_030637820	ASC1-like protein	protein_coding	0.275054656	1	1	0.073379689	1	1
6.785343408830418e-07	NC_044375.1	46072001	46075599	+	39.8724	3598	Intergenic	Intergenic	58938	LOC115720127	LOC115720127	XM_030649288	uncharacterized LOC115720127	protein_coding	NA	NA	NA	NA	NA	NA
0.0002926021437518152	NC_044375.1	61353401	61355399	+	39.8697	1998	Intergenic	Intergenic	16873	LOC115720237	LOC115720237	XM_030649394	uncharacterized LOC115720237	protein_coding	NA	NA	NA	NA	NA	NA
0.00030426443956314576-2	NC_044377.1	30323201	30325399	+	39.8644	2198	Intergenic	Intergenic	-3276	LOC115696022	LOC115696022	XR_004007623	small nucleolar RNA R71	snoRNA	NA	NA	NA	NA	NA	NA
0.00030426443956314576	NC_044373.1	78131201	78132999	+	39.8644	1798	Intergenic	Intergenic	-3468	LOC115715232	LOC115715232	XM_030644071	thioredoxin-like protein 4B,	protein_coding	-0.819343011	1	1	-0.637185065	1	1
0.00031639630053486656	NC_044377.1	44338801	44340399	+	39.8589	1598	Intergenic	Intergenic	-37574	LOC115724935	LOC115724935	XM_030654312	uncharacterized LOC115724935,	protein_coding	-0.647235119	1	1	0.029586331	1	1
0.00032901687598189684	NC_044370.1	8676201	8678399	+	39.8534	2198	Intergenic	Intergenic	24971	LOC115703342	LOC115703342	XM_030630777	uncharacterized LOC115703342	protein_coding	-1.44840808	0.057718112	0.280039188	-1.886603244	0.000170216	0.002511179
0.00032901687598189684-2	NC_044370.1	23258401	23260999	+	39.8534	2598	Intergenic	Intergenic	-7175	LOC115707434	LOC115707434	XM_030635398	potassium channel AKT1	protein_coding	3.965682155	2.43983E-23	1.96702E-21	1.435229009	0.072633783	0.412234784
0.0003421461089828395	NC_044373.1	70274201	70276799	+	39.8479	2598	Intergenic	Intergenic	-4814	LOC115713629	LOC115713629	XM_030642116	uncharacterized LOC115713629	protein_coding	NA	NA	NA	NA	NA	NA
0.00035580476998356533-2	NC_044379.1	1944801	1946599	+	39.8422	1798	Intergenic	Intergenic	-844089	LOC115698919	LOC115698919	XM_030626122	extracellular ribonuclease LE	protein_coding	-2.667802986	0.007814691	0.050323215	-6.151631711	1.46512E-17	1.49016E-15
0.00035580476998356533	NC_044377.1	32523001	32524199	+	39.8422	1198	Intergenic	Intergenic	-29625	LOC115695417	LOC115695417	XM_030622482	indole-3-acetic acid-amido synthetase GH3.6	protein_coding	2.331835452	0.012394541	0.075113576	-4.117943455	8.88705E-10	3.52239E-08
0.00037001449186308997	NC_044370.1	74506601	74508199	+	39.8365	1598	Intergenic	Intergenic	-11908	LOC115714431	LOC115714431	XM_030643149	cytochrome P450 81Q32,	protein_coding	3.429987273	0.190808323	0.743093272	-1.715017736	0.62759098	1
3.884412141444997e-09	NC_044375.1	36235601	36241599	+	39.8346	5998	Intergenic	Intergenic	-18119	LOC115720694	LOC115720694	XM_030649859	uncharacterized LOC115720694	protein_coding	-0.844170127	1	1	-1.1198613	0.612495088	1
1.1971640494597478e-06	NC_044372.1	51422001	51426199	+	39.8308	4198	Intergenic	Intergenic	132728	LOC115709149	LOC115709149	XM_030637183	UPF0481 protein At3g47200	protein_coding	-0.374399795	1	NA	-2.293764971	0.74473371	NA
1.341288447647782e-06-2	NC_044372.1	13968201	13971199	+	39.822	2998	Intergenic	Intergenic	-5121	LOC115709792	LOC115709792	XM_030638006	inorganic pyrophosphatase TTM1,	protein_coding	0.945041714	1	1	0.429427408	1	1
1.341288447647782e-06	NC_044370.1	43286001	43290599	+	39.822	4598	intron	-intron (LOC115711048, intron 7 of 8)	13594	LOC115711048	LOC115711048	XM_030639393	agamous-like MADS-box protein AGL66,	protein_coding	-1.996932068	0.061132246	0.293859758	2.00349299	0.13979179	0.684990462
0.0004161800677922972	NC_044374.1	5195001	5196799	+	39.819	1798	Intergenic	Intergenic	-7768	LOC115717500	LOC115717500	XM_030646486	inorganic phosphate transporter 1-11-like	protein_coding	NA	NA	NA	NA	NA	NA
0.0004161800677922972-2	NC_044376.1	11129401	11131599	+	39.819	2198	promoter-TSS	-promoter-TSS (LOC115723562)	-669	LOC115723562	LOC115723562	XM_030653052	B3 domain-containing transcription factor VRN1-like	protein_coding	-0.199511221	1	NA	1.374235327	0.904561326	NA
1.446920207303336e-06	NC_044374.1	81460201	81464199	+	39.816	3998	TTS	-TTS (LOC115718059)	972	LOC115718059	LOC115718059	XM_030647022	uncharacterized LOC115718059	protein_coding	NA	NA	NA	NA	NA	NA
0.0004328289254889832-2	NC_044377.1	52444001	52447199	+	39.813	3198	Intergenic	Intergenic	152202	LOC115696088	LOC115696088	XR_004007686	small nucleolar RNA R71	snoRNA	NA	NA	NA	NA	NA	NA
0.0004328289254889832	NC_044375.1	61596401	61598199	+	39.813	1798	Intergenic	Intergenic	-39404	LOC115720239	LOC115720239	XM_030649396	uncharacterized LOC115720239	protein_coding	NA	NA	NA	NA	NA	NA
0.0004681747754010213	NC_044376.1	8845201	8847199	+	39.8007	1998	promoter-TSS	-promoter-TSS (LOC115724386)	-746	LOC115724386	LOC115724386	XR_004013179	small nucleolar RNA R71	snoRNA	NA	NA	NA	NA	NA	NA
0.00048692819134606884-2	NC_044377.1	2128401	2130799	+	39.7945	2398	Intergenic	Intergenic	-3207	LOC115724983	LOC115724983	XM_030654373	cytochrome P450 71D11	protein_coding	4.931928883	0.012053169	0.073275794	-5.263743646	3.712E-05	0.000647511
0.00048692819134606884	NC_044371.1	54550401	54551999	+	39.7945	1598	Intergenic	Intergenic	-360273	LOC115704145	LOC115704145	XM_030631362	uncharacterized LOC115704145	protein_coding	NA	NA	NA	NA	NA	NA
0.00048692819134606884-3	NC_044377.1	22282001	22283999	+	39.7945	1998	Intergenic	Intergenic	-34876	LOC115725654	LOC115725654	XM_030655239	DNA replication licensing factor MCM5	protein_coding	-4.042263987	0.000133316	0.001312878	-2.223664959	0.125657697	0.631990795
1.959822720863414e-06	NC_044378.1	56662601	56667599	+	39.7913	4998	Intergenic	Intergenic	27335	LOC115696669	LOC115696669	XM_030623559	uncharacterized LOC115696669	protein_coding	NA	NA	NA	NA	NA	NA
0.0005064415245145084	NW_022060388.1	100201	102199	+	39.7882	1998	NA	NA	NA	NA			#N/A		NA	NA	NA	NA	NA	NA
0.0005267460242031117-2	NC_044379.1	32861201	32863799	+	39.7817	2598	Intergenic	Intergenic	-4336	LOC115698965	LOC115698965	XR_004008268	uncharacterized LOC115698965,	lncRNA	0	1	NA	-0.410947537	1	NA
0.0005267460242031117	NC_044376.1	38321401	38323799	+	39.7817	2398	Intergenic	Intergenic	38800	LOC115723817	LOC115723817	XM_030653286	zinc finger protein 5-like	protein_coding	NA	NA	NA	NA	NA	NA
0.0005478742494162305-2	NC_044372.1	35004601	35007399	+	39.7752	2798	Intergenic	Intergenic	8046	LOC115708980	LOC115708980	XM_030636998	UDP-glycosyltransferase 73C4	protein_coding	-1.456522322	0.415021957	1	-1.711905136	0.201031937	0.903327941
0.0005478742494162305	NC_044370.1	79501001	79502799	+	39.7752	1798	Intergenic	Intergenic	24646	LOC115703344	LOC115703344	XR_004009116	small nucleolar RNA R71	snoRNA	NA	NA	NA	NA	NA	NA
0.0005478742494162305-3	NC_044375.1	43674201	43675999	+	39.7752	1798	Intergenic	Intergenic	-119895	LOC115721317	LOC115721317	XM_030650591	tropomyosin-2-like	protein_coding	-1.940454338	0.414144069	1	-0.234417585	1	1
2.655377569529891e-06	NC_044375.1	8258801	8262199	+	39.7653	3398	Intergenic	Intergenic	33188	LOC115720609	LOC115720609	XM_030649764	transcription factor FER-LIKE IRON DEFICIENCY-INDUCED TRANSCRIPTION FACTOR	protein_coding	-4.006486014	0.061971694	0.297226018	-3.102320591	0.203844205	0.912764302
0.0005927390011265488	NC_044373.1	61555801	61557799	+	39.762	1998	Intergenic	Intergenic	-46551	LOC115712517	LOC115712517	XR_004010883	uncharacterized LOC115712517	lncRNA	NA	NA	NA	NA	NA	NA
0.0005927390011265488-2	NC_044374.1	35594201	35595999	+	39.762	1798	Intergenic	Intergenic	-95289	LOC115717269	LOC115717269	XR_004011724	uncharacterized LOC115717269	lncRNA	NA	NA	NA	NA	NA	NA
0.0005927390011265488-3	NC_044374.1	61952601	61954199	+	39.762	1598	Intergenic	Intergenic	-73582	LOC115717886	LOC115717886	XM_030646856	uncharacterized mitochondrial protein AtMg00310-like	protein_coding	-1.191161672	0.962318612	NA	0	1	NA
0.0005927390011265488-4	NC_044375.1	69243601	69246599	+	39.762	2998	Intergenic	Intergenic	-76282	LOC115720305	LOC115720305	XM_030649458	uncharacterized LOC115720305	protein_coding	NA	NA	NA	NA	NA	NA
0.0005927390011265488-5	NC_044376.1	49725601	49727599	+	39.762	1998	Intergenic	Intergenic	-2606	LOC115722774	LOC115722774	XM_030652083	phenylalanine--tRNA ligase, chloroplastic/mitochondrial	protein_coding	1.530604407	0.000274626	0.002568924	1.238078261	0.101685881	0.536123889
0.0006165477132652059-2	NC_044377.1	14346401	14347999	+	39.7552	1598	Intergenic	Intergenic	-47581	LOC115724470	LOC115724470	XM_030653762	nifU-like protein 3, chloroplastic	protein_coding	1.98813057	0.006329145	0.041758525	0.98677311	1	1
0.0006165477132652059	NC_044373.1	39416401	39417599	+	39.7552	1198	Intergenic	Intergenic	-20109	LOC115714220	LOC115714220	XM_030642813	cell division control protein 2 homolog	protein_coding	-0.899692926	1	1	-0.193847904	1	1
1.6732469124078248e-08	NC_044379.1	15256001	15261399	+	39.7529	5398	Intergenic	Intergenic	-54972	LOC115700615	LOC115700615	XM_030628222	peptidyl-prolyl cis-trans isomerase CYP23,	protein_coding	-0.926169849	1	1	-0.66703276	1	1
3.2110171713975727e-06	NC_044370.1	7099401	7102799	+	39.7484	3398	Intergenic	Intergenic	-8325	LOC115703220	LOC115703220	XM_030630734	probable 2-oxoglutarate-dependent dioxygenase At3g111800	protein_coding	-2.444478988	1.32205E-08	2.50629E-07	-4.118777727	7.85201E-35	2.74435E-32
0.0006671098079456938-2	NC_044377.1	30788801	30790399	+	39.7414	1598	Intergenic	Intergenic	-12528	LOC115695091	LOC115695091	XM_030622184	uncharacterized LOC115695091	protein_coding	NA	NA	NA	NA	NA	NA
0.0006671098079456938	NC_044375.1	28594001	28595399	+	39.7414	1398	Intergenic	Intergenic	-30277	LOC115721047	LOC115721047	XM_030650281	pentatricopeptide repeat-containing protein At4g11690	protein_coding	-0.141289603	1	1	-0.198656268	1	1
0.0006671098079456938-3	NW_022060513.1	51801	53999	+	39.7414	2198	NA	NA	NA	NA			#N/A		NA	NA	NA	NA	NA	NA
0.0006939448846066111	NC_044378.1	58277601	58279599	+	39.7343	1998	Intergenic	Intergenic	-11349	LOC115697136	LOC115697136	XR_004007897	uncharacterized LOC115697136	lncRNA	-1.499592328	0.356199396	1	-0.175982035	1	1
0.0006939448846066111-2	NC_044379.1	9836801	9838799	+	39.7343	1998	Intergenic	Intergenic	8096	LOC115699816	LOC115699816	XM_030627359	uncharacterized LOC115699816	protein_coding	-3.616903531	0.420544836	NA	0	1	NA
3.883446300681804e-06	NC_044377.1	64010801	64015799	+	39.7308	4998	Intergenic	Intergenic	17759	LOC115696086	LOC115696086	XR_004007684	small nucleolar RNA R71	snoRNA	NA	NA	NA	NA	NA	NA
0.0007218733287732856	NC_044377.1	65830401	65832599	+	39.7272	2198	intron	-intron (LOC115724630, intron 1 of 2)	4987	LOC115724630	LOC115724630	XM_030653960	probable LRR receptor-like serine/threonine-protein kinase At3g47570,	protein_coding	-2.095549919	0.00950531	0.059673603	0.068835146	1	1
4.034032675223104e-06	NC_044375.1	40870001	40873599	+	39.7272	3598	Intergenic	Intergenic	4357	LOC115720092	LOC115720092	XM_030649254	uncharacterized LOC115720092	protein_coding	NA	NA	NA	NA	NA	NA
0.0007509404282987212	NC_044372.1	19674801	19676799	+	39.7199	1998	Intergenic	Intergenic	23270	LOC115710512	LOC115710512	XM_030638876	uncharacterized mitochondrial protein AtMg00860-like	protein_coding	NA	NA	NA	NA	NA	NA
0.0008126814115023781	NC_044375.1	77208401	77209999	+	39.7051	1598	Intergenic	Intergenic	-34393	LOC115720370	LOC115720370	XM_030649522	uncharacterized LOC115720370	protein_coding	NA	NA	NA	NA	NA	NA
0.0008126814115023781-2	NC_044376.1	32779201	32780999	+	39.7051	1798	Intergenic	Intergenic	-8212	LOC115723396	LOC115723396	XM_030652871	pentatricopeptide repeat-containing protein At3g23020	protein_coding	1.046361671	0.798155603	1	0.639070791	1	1
0.0008454557916914312-2	NC_044378.1	13400601	13402199	+	39.6975	1598	Intergenic	Intergenic	-13818	LOC115696221	LOC115696221	XM_030623127	17.3 kDa class I heat shock protein	protein_coding	-0.54124743	1	1	-1.385371763	0.496838935	1
0.0008454557916914312	NC_044370.1	77883201	77884599	+	39.6975	1398	Intergenic	Intergenic	-12314	LOC115717750	LOC115717750	XM_030646730	aspartyl protease AED3	protein_coding	-6.181671592	NA	NA	-4.905502218	NA	NA
0.000879569998673312	NC_044372.1	81015001	81017199	+	39.6898	2198	Intergenic	Intergenic	15173	LOC115711006	LOC115711006	XM_030639351	uncharacterized LOC115711006	protein_coding	NA	NA	NA	NA	NA	NA
0.0009520432435675684-2	NW_022060467.1	65801	67599	+	39.6741	1798	intron	-intron (LOC115702165, intron 4 of 4)	1547	LOC115702166	LOC115702166	XR_004008812	#N/A	lncRNA	-1.774722815	0.665136808	1	-5.208357097	0.008294614	0.069174563
0.0009520432435675684	NC_044376.1	5254601	5256399	+	39.6741	1798	Intergenic	Intergenic	5534	LOC115723486	LOC115723486	XM_030652981	glucan endo-1,3-beta-glucosidase, basic vacuolar isoform	protein_coding	-5.013115093	0.003098302	0.022215094	-2.871698029	0.167804506	0.790033312
0.0009905209947191189	NC_044370.1	65202201	65203799	+	39.6661	1598	Intergenic	Intergenic	-21742	LOC115703303	LOC115703303	XR_004009078	small nucleolar RNA R71	snoRNA	NA	NA	NA	NA	NA	NA
0.0009905209947191189-8	NC_044379.1	38092801	38094999	+	39.6661	2198	Intergenic	Intergenic	7474	TRNAH-GUG_4	TRNAH-GUG_4	TRNAH-GUG_4	#N/A	tRNA	NA	NA	NA	NA	NA	NA
0.0009905209947191189-2	NC_044371.1	21380801	21382799	+	39.6661	1998	promoter-TSS	-promoter-TSS (LOC115706777)	303	LOC115703888	LOC115703888	XM_030631125	uncharacterized LOC115703888	protein_coding	NA	NA	NA	NA	NA	NA
0.0009905209947191189-6	NC_044374.1	71581601	71583799	+	39.6661	2198	Intergenic	Intergenic	40593	LOC115717965	LOC115717965	XM_030646933	uncharacterized LOC115717965	protein_coding	NA	NA	NA	NA	NA	NA
0.0009905209947191189-4	NC_044372.1	42176401	42177999	+	39.6661	1598	Intergenic	Intergenic	3875	LOC115710697	LOC115710697	XM_030639048	uncharacterized LOC115710697	protein_coding	NA	NA	NA	NA	NA	NA
0.0009905209947191189-3	NC_044372.1	25095601	25097399	+	39.6661	1798	Intergenic	Intergenic	-45460	LOC115710563	LOC115710563	XM_030638923	uncharacterized LOC115710563	protein_coding	NA	NA	NA	NA	NA	NA
0.0009905209947191189-7	NC_044378.1	34753201	34754599	+	39.6661	1398	Intergenic	Intergenic	28982	LOC115698119	LOC115698119	XM_030625294	nudix hydrolase 15, mitochondrial	protein_coding	-0.132188946	1	1	-0.650195522	1	1
0.0009905209947191189-5	NC_044373.1	82254401	82256799	+	39.6661	2398	Intergenic	Intergenic	-17817	LOC115712475	LOC115712475	XM_030640755	L-ascorbate oxidase homolog	protein_coding	-0.374376113	1	NA	0	1	NA
0.0010305762123367088-3	NC_044374.1	60113201	60114799	+	39.6579	1598	Intergenic	Intergenic	-342155	LOC115717877	LOC115717877	XM_030646848	uncharacterized LOC115717877	protein_coding	NA	NA	NA	NA	NA	NA
0.0010305762123367088-2	NC_044370.1	49174401	49176199	+	39.6579	1798	Intergenic	Intergenic	-30721	LOC115711665	LOC115711665	XM_030640043	cyclin-dependent kinase B2-1	protein_coding	-1.266655202	0.51332294	1	-1.512259703	0.208070173	0.924775873
0.0010305762123367088	NC_044370.1	48779601	48780999	+	39.6579	1398	Intergenic	Intergenic	11792	LOC115721109	LOC115721109	XM_030650358	uncharacterized LOC115721109	protein_coding	NA	NA	NA	NA	NA	NA
8.32032932056215e-06	NC_044377.1	61315401	61320199	+	39.6538	4798	Intergenic	Intergenic	6257	LOC115725358	LOC115725358	XM_030654845	NEDD8 ultimate buster 1	protein_coding	-0.290933182	1	1	-0.127985999	1	1
0.0010722747792650436	NC_044377.1	67996801	67997799	+	39.6496	998	intron	-intron (LOC115695403, intron 4 of 4)	7331	LOC115696024	LOC115696024	XR_004007625	U4 spliceosomal RNA	snRNA	-0.195427959	1	1	-1.054607678	0.95521693	1
0.0011156853982416917	NC_044378.1	38111601	38112999	+	39.6412	1398	Intergenic	Intergenic	29415	LOC115698027	LOC115698027	XR_004008021	uncharacterized LOC115698027	lncRNA	0	1	NA	-3.326751962	0.485942891	NA
9.329770516438303e-06	NW_022060473.1	39201	41599	+	39.6412	2398	Intergenic	Intergenic	-3764	LOC115702181	LOC115702181	XM_030629632	#N/A	protein_coding	-4.002322584	1.55623E-11	4.26145E-10	1.725638098	0.28173757	1
0.0011608797166112635-2	NC_044375.1	46963601	46965399	+	39.6327	1798	Intergenic	Intergenic	-50961	LOC115719509	LOC115719509	XM_030648584	autophagy-related protein 18a	protein_coding	0.468615671	1	1	0.12239819	1	1
0.0011608797166112635	NC_044371.1	38947201	38948199	+	39.6327	998	Intergenic	Intergenic	-10955	LOC115704033	LOC115704033	XM_030631256	#N/A	protein_coding	-0.230554528	1	1	0.562396448	1	1
0.0011608797166112635-3	NC_044377.1	43938001	43939199	+	39.6327	1198	Intergenic	Intergenic	-165432	LOC115695668	LOC115695668	XM_030622727	uncharacterized protein At1g66480	protein_coding	-3.167632037	5.83816E-07	8.59824E-06	0.071708717	1	1
0.0012079324568027396	NC_044375.1	50843801	50845599	+	39.624	1798	Intergenic	Intergenic	-16219	LOC115720169	LOC115720169	XM_030649327	protein NYNRIN-like	protein_coding	NA	NA	NA	NA	NA	NA
0.0012079324568027396-2	NC_044377.1	20848401	20849599	+	39.624	1198	Intergenic	Intergenic	21027	LOC115695039	LOC115695039	XM_030622137	uncharacterized LOC115695039	protein_coding	NA	NA	NA	NA	NA	NA
1.1293069677e-05	NC_044377.1	42848801	42852199	+	39.6197	3398	Intergenic	Intergenic	38473	LOC115695200	LOC115695200	XM_030622285	uncharacterized LOC115695200	protein_coding	NA	NA	NA	NA	NA	NA
0.0012569215528524767	NC_044374.1	56617401	56618999	+	39.6152	1598	Intergenic	Intergenic	-6098	LOC115717862	LOC115717862	XM_030646833	uncharacterized LOC115717862	protein_coding	NA	NA	NA	NA	NA	NA
0.0012569215528524767-2	NC_044375.1	55727401	55728199	+	39.6152	798	Intergenic	Intergenic	-13748	LOC115720899	LOC115720899	XM_030650103	hydroxyproline O-arabinosyltransferase 3	protein_coding	0.121805545	1	1	-0.107409102	1	1
0.0012569215528524767-3	NC_044377.1	40374801	40376399	+	39.6152	1598	Intergenic	Intergenic	-16184	LOC115695183	LOC115695183	XM_030622275	uncharacterized LOC115695183	protein_coding	NA	NA	NA	NA	NA	NA
0.0012569215528524767-4	NC_044379.1	54235601	54237599	+	39.6152	1998	Intergenic	Intergenic	-7618	LOC115699699	LOC115699699	XM_030627226	lipoyl synthase, mitochondrial	protein_coding	0.940238965	1	1	0.324913288	1	1
0.0012569215528524767-5	NW_022060446.1	48601	49999	+	39.6152	1398	Intergenic	Intergenic	-11330	LOC115702107	LOC115702107	XM_030629562	#N/A	protein_coding	0.635592453	1	1	-0.418670574	1	1
1.2665191332058656e-05	NC_044372.1	17763201	17766799	+	39.6063	3598	intron	-intron (LOC115710493, intron 5 of 6)	8148	LOC115710493	LOC115710493	XM_030638857	uncharacterized LOC115710493	protein_coding	NA	NA	NA	NA	NA	NA
0.0013079282932698904	NW_022060340.1	194201	195799	+	39.6063	1598	Intergenic	Intergenic	-4310	LOC115701996	LOC115701996	XM_030629463	#N/A	protein_coding	-1.548840887	0.891299672	NA	0	1	NA
0.0013610374705590408-2	NC_044379.1	52873001	52874999	+	39.5972	1998	Intergenic	Intergenic	3430	LOC115700262	LOC115700262	XM_030627830	peroxidase 27	protein_coding	-0.374376113	1	NA	0	1	NA
0.0013610374705590408	NC_044371.1	68085001	68086999	+	39.5972	1998	Intergenic	Intergenic	-14688	LOC115706051	LOC115706051	XM_030633565	serine/threonine-protein kinase WNK8,	protein_coding	-1.263372184	0.443841105	1	-2.30194677	0.000137515	0.002063587
0.0014163375377257352-3	NC_044379.1	40403401	40404799	+	39.588	1398	Intergenic	Intergenic	-8020	LOC115700101	LOC115700101	XM_030627660	uncharacterized LOC115700101	protein_coding	-2.36076541	0.731744197	NA	0	1	NA
0.0014163375377257352	NC_044373.1	8970001	8971399	+	39.588	1398	Intergenic	Intergenic	13792	LOC115712135	LOC115712135	XM_030640378	calmodulin-7	protein_coding	-1.237670968	0.453688337	1	-0.828619184	1	1
0.0014163375377257352-2	NC_044374.1	82174801	82176599	+	39.588	1798	Intergenic	Intergenic	8095	LOC115718066	LOC115718066	XM_030647029	uncharacterized LOC115718066	protein_coding	NA	NA	NA	NA	NA	NA
0.0014739207721176013	NC_044375.1	55729201	55730999	+	39.5786	1798	Intergenic	Intergenic	-11448	LOC115720899	LOC115720899	XM_030650103	hydroxyproline O-arabinosyltransferase 3	protein_coding	0.121805545	1	1	-0.107409102	1	1
1.6554555354450223e-05	NC_044374.1	53571201	53573999	+	39.5738	2798	Intergenic	Intergenic	17498	LOC115716619	LOC115716619	XM_030645454	autophagy-related protein 3	protein_coding	0.151496817	1	1	-0.02478859	1	1
2.0756480973262719e-07	NC_044378.1	38542401	38548999	+	39.5722	6598	promoter-TSS	-promoter-TSS (LOC115696967)	-429	LOC115696967	LOC115696967	XR_004007849	uncharacterized LOC115696967,	lncRNA	-0.374376113	1	NA	0	1	NA
0.0015338834469632988	NC_044371.1	54828801	54830199	+	39.569	1398	Intergenic	Intergenic	-81973	LOC115704145	LOC115704145	XM_030631362	uncharacterized LOC115704145	protein_coding	NA	NA	NA	NA	NA	NA
0.0015338834469632988-2	NC_044373.1	81354801	81356399	+	39.569	1598	Intergenic	Intergenic	-20190	LOC115713748	LOC115713748	XM_030642228	patatin-like protein 3	protein_coding	0	1	1	-5.692190218	0.014741708	0.11134768
0.0015963260109968136-2	NC_044374.1	77428801	77429399	+	39.5594	598	Intergenic	Intergenic	120942	LOC115718006	LOC115718006	XM_030646974	uncharacterized LOC115718006	protein_coding	0	1	NA	-0.410947537	1	NA
0.0015963260109968136	NC_044370.1	68487001	68488599	+	39.5594	1598	Intergenic	Intergenic	64744	LOC115713717	LOC115713717	XM_030642202	uncharacterized LOC115713717,	protein_coding	0.715891661	1	1	0.46601233	1	1
1.8569917007427523e-05	NC_044373.1	15305801	15307599	+	39.5594	1798	Intergenic	Intergenic	-10636	LOC115712476	LOC115712476	XR_004010875	uncharacterized LOC115712476	lncRNA	NA	NA	NA	NA	NA	NA
0.0016613532765738523-2	NC_044371.1	36440201	36441799	+	39.5495	1598	Intergenic	Intergenic	-7040	LOC115704006	LOC115704006	XM_030631228	uncharacterized LOC115704006	protein_coding	NA	NA	NA	NA	NA	NA
0.0016613532765738523	NC_044370.1	15280601	15282399	+	39.5495	1798	Intergenic	Intergenic	11657	LOC115717224	LOC115717224	XM_030646200	uncharacterized protein Mb2253c-like	protein_coding	NA	NA	NA	NA	NA	NA
0.0016613532765738523-3	NC_044376.1	22382601	22384599	+	39.5495	1998	Intergenic	Intergenic	-4002	LOC115721790	LOC115721790	XM_030650867	uncharacterized N-acetyltransferase YvbK	protein_coding	-0.336690939	1	1	-0.247571114	1	1
2.083203218686463e-05	NC_044378.1	19158801	19161399	+	39.5445	2598	Intergenic	Intergenic	44654	LOC115696416	LOC115696416	XM_030623318	uncharacterized mitochondrial protein AtMg00240-like	protein_coding	NA	NA	NA	NA	NA	NA
2.1646057740854726e-05	NC_044375.1	41792801	41795999	+	39.5395	3198	promoter-TSS	-promoter-TSS (LOC115720105)	-538	LOC115720105	LOC115720105	XM_030649267	uncharacterized LOC115720105	protein_coding	NA	NA	NA	NA	NA	NA
0.0017290746167096724	NC_044376.1	32044601	32046199	+	39.5395	1598	Intergenic	Intergenic	17326	LOC115723345	LOC115723345	XM_030652788	protein SIEVE ELEMENT OCCLUSION B	protein_coding	-1.390095979	0.392406908	1	-3.785263316	9.9061E-10	3.90215E-08
2.523488341438357e-05	NW_022060454.1	1373001	1376599	+	39.5189	3598	Intergenic	Intergenic	-127392	LOC115702125	LOC115702125	XM_030629583	#N/A	protein_coding	0.642329408	1	1	-2.642988593	0.003486277	0.033308503
0.0019495696286461806-3	NC_044375.1	23022801	23024599	+	39.5084	1798	Intergenic	Intergenic	25362	LOC115720683	LOC115720683	XR_004012292	uncharacterized LOC115720683	lncRNA	-5.702899113	6.1672E-05	0.000649956	0.561737546	1	1
0.0019495696286461806-4	NC_044378.1	59760401	59761799	+	39.5084	1398	TTS	-TTS (LOC115698358)	213	LOC115698358	LOC115698358	XR_004008110	small nucleolar RNA R71	snoRNA	NA	NA	NA	NA	NA	NA
0.0019495696286461806-2	NC_044370.1	41642601	41643599	+	39.5084	998	Intergenic	Intergenic	-74340	LOC115720412	LOC115720412	XM_030649565	uncharacterized LOC115720412	protein_coding	NA	NA	NA	NA	NA	NA
0.0019495696286461806	NC_044370.1	33485801	33487199	+	39.5084	1398	Intergenic	Intergenic	93850	LOC115710175	LOC115710175	XM_030638520	E3 ubiquitin-protein ligase RNF25	protein_coding	-0.033704391	1	1	0.297944617	1	1
2.831420820880193e-05	NC_044378.1	49606801	49609799	+	39.5031	2998	Intergenic	Intergenic	-18225	LOC115698135	LOC115698135	XM_030625310	thioredoxin H-type	protein_coding	0.425260202	1	1	1.728159267	0.015637019	0.11709794
0.0020292596452548355-5	NC_044378.1	56363801	56365199	+	39.4977	1398	Intergenic	Intergenic	44947	LOC115698350	LOC115698350	XR_004008103	small nucleolar RNA R71	snoRNA	NA	NA	NA	NA	NA	NA
0.0020292596452548355-4	NC_044378.1	40862201	40863399	+	39.4977	1198	Intergenic	Intergenic	21548	LOC115696567	LOC115696567	XM_030623461	probable aspartyl protease At4g16563	protein_coding	NA	NA	NA	NA	NA	NA
0.0020292596452548355-3	NC_044377.1	57763401	57764799	+	39.4977	1398	Intergenic	Intergenic	25568	LOC115695300	LOC115695300	XM_030622375	uncharacterized LOC115695300	protein_coding	NA	NA	NA	NA	NA	NA
0.0020292596452548355-2	NC_044376.1	42890601	42891399	+	39.4977	798	Intergenic	Intergenic	69460	LOC115722873	LOC115722873	XM_030652220	uncharacterized LOC115722873	protein_coding	0.109180148	1	1	-0.433637597	1	1
0.0020292596452548355	NC_044375.1	69303401	69304399	+	39.4977	998	Intergenic	Intergenic	-28202	LOC115718804	LOC115718804	XR_004012043	uncharacterized LOC115718804	lncRNA	NA	NA	NA	NA	NA	NA
0.0021122665914586132	NC_044374.1	21893001	21894799	+	39.4868	1798	Intergenic	Intergenic	37017	LOC115715927	LOC115715927	XM_030644610	uncharacterized LOC115715927,	protein_coding	-3.676951257	0.011774191	0.071715868	-4.848761288	0.000275165	0.003832973
0.0021987319019981006	NC_044372.1	30791201	30792999	+	39.4757	1798	Intergenic	Intergenic	19701	LOC115709700	LOC115709700	XM_030637870	uncharacterized PKHD-type hydroxylase At1g22950,	protein_coding	-0.297831407	1	1	0.071062113	1	1
3.4309492413250027e-05	NC_044374.1	77651401	77654199	+	39.4757	2798	TTS	-TTS (LOC115718320)	246	LOC115718320	LOC115718320	XR_004011899	small nucleolar RNA R71	snoRNA	NA	NA	NA	NA	NA	NA
3.7051339081783805e-05	NC_044370.1	45096201	45098999	+	39.4644	2798	Intergenic	Intergenic	-27816	LOC115711305	LOC115711305	XM_030639645	cyclin-D4-1	protein_coding	0	1	NA	-0.410947537	1	NA
0.0022888032427563544	NC_044370.1	95016801	95018399	+	39.4644	1598	Intergenic	Intergenic	20259	LOC115703029	LOC115703029	XM_030630512	uncharacterized LOC115703029	protein_coding	-1.33994218	0.597118852	1	-1.717499992	0.263158676	1
4.001368634028339e-05	NC_044378.1	12130401	12133399	+	39.4529	2998	Intergenic	Intergenic	-28463	LOC115697513	LOC115697513	XM_030624548	protein NRT1/ PTR FAMILY 5.6	protein_coding	-0.329597083	1	1	1.213830774	0.592184636	1
4.1583075886506495e-05	NC_044370.1	39117201	39120599	+	39.447	3398	Intergenic	Intergenic	4787	LOC115710644	LOC115710644	XM_030639001	alcohol dehydrogenase 1	protein_coding	-2.172706477	0.002416185	0.017843384	-3.41222637	4.2406E-10	1.75683E-08
8.883230358664298e-12	NC_044372.1	55716201	55722999	+	39.4332	6798	Intergenic	Intergenic	1907	TRNAM-CAU_5	TRNAM-CAU_5	TRNAM-CAU_5	#N/A	tRNA	NA	NA	NA	NA	NA	NA
1.0138669843206234e-06	NC_044374.1	16013801	16016999	+	39.4212	3198	Intergenic	Intergenic	-5618	LOC115717601	LOC115717601	XM_030646585	uncharacterized LOC115717601	protein_coding	NA	NA	NA	NA	NA	NA
5.238983917761644e-05	NC_044376.1	46528201	46531399	+	39.4109	3198	Intergenic	Intergenic	-25458	LOC115723211	LOC115723211	XM_030652648	soluble starch synthase 3, chloroplastic/amyloplastic	protein_coding	1.291780618	0.135335411	0.565063555	1.275675967	0.158285708	0.755206298
1.135797309094765e-06	NC_044373.1	42829401	42833799	+	39.4089	4398	TTS	-TTS (LOC115713437)	992	LOC115713437	LOC115713437	XM_030641920	stress response protein NST1-like	protein_coding	0.587400514	1	NA	-0.333047658	1	NA
5.8812097773060954e-05	NC_044370.1	20442401	20444999	+	39.3921	2598	Intergenic	Intergenic	-27114	LOC115717839	LOC115717839	XM_030646812	uncharacterized LOC115717839	protein_coding	NA	NA	NA	NA	NA	NA
5.8812097773060954e-05-2	NC_044373.1	30925601	30928999	+	39.3921	3398	Intergenic	Intergenic	-4738	LOC115712330	LOC115712330	XM_030640604	protein STICHEL	protein_coding	-1.31300836	0.236593437	0.877660294	-0.771709253	1	1
6.862537508122013e-05-2	NC_044377.1	8819401	8821999	+	39.3662	2598	Intergenic	Intergenic	-28602	LOC115724830	LOC115724830	XM_030654179	CCR4-NOT transcription complex subunit 10,	protein_coding	0.404104435	1	1	0.70149441	1	1
6.862537508122013e-05	NC_044370.1	40467601	40470399	+	39.3662	2798	Intergenic	Intergenic	-6447	LOC115710792	LOC115710792	XM_030639153	uncharacterized LOC115710792, transcript variant X8	protein_coding	-1.329311256	0.075530024	0.350534441	-0.209511174	1	1
7.1326343539071e-05	NC_044371.1	86394601	86396999	+	39.3595	2398	Intergenic	Intergenic	-6068	LOC115707895	LOC115707895	XM_030635991	bifunctional L-3-cyanoalanine synthase/cysteine synthase 1, mitochondrial	protein_coding	2.452915876	0.000937371	0.007710352	2.067464405	0.015032577	0.113188889
7.1326343539071e-05-2	NC_044372.1	13114601	13117199	+	39.3595	2598	Intergenic	Intergenic	11232	LOC115709631	LOC115709631	XM_030637780	probable cyclic nucleotide-gated ion channel 16	protein_coding	2.088460104	0.02713752	0.146782372	-0.155972653	1	1
7.705370978309778e-05	NC_044370.1	11024601	11028199	+	39.3461	3598	promoter-TSS	-promoter-TSS (LOC115716277)	-874	LOC115716277	LOC115716277	XM_030645041	uncharacterized LOC115716277	protein_coding	NA	NA	NA	NA	NA	NA
8.008883853640925e-05	NC_044376.1	39883401	39886199	+	39.3392	2798	Intergenic	Intergenic	14225	LOC115723300	LOC115723300	XM_030652740	uncharacterized LOC115723300	protein_coding	0.611449907	1	1	0.41973092	1	1
8.652515381543072e-05-2	NC_044375.1	57584001	57586799	+	39.3254	2798	Intergenic	Intergenic	87633	LOC115721624	LOC115721624	XR_004012631	small nucleolar RNA R71	snoRNA	NA	NA	NA	NA	NA	NA
8.652515381543072e-05	NC_044373.1	79941001	79943199	+	39.3254	2198	Intergenic	Intergenic	-26704	LOC115712567	LOC115712567	XM_030640864	uncharacterized acetyltransferase At3g50280	protein_coding	2.012674357	0.047578934	0.237129852	-0.695457195	1	1
8.652515381543072e-05-3	NC_044378.1	2869801	2872799	+	39.3254	2998	Intergenic	Intergenic	16447	LOC115697687	LOC115697687	XM_030624780	uncharacterized LOC115697687	protein_coding	NA	NA	NA	NA	NA	NA
8.99361735405374e-05-2	NC_044377.1	66902201	66904399	+	39.3183	2198	Intergenic	Intergenic	21159	LOC115724638	LOC115724638	XM_030653970	receptor-like protein EIX2	protein_coding	-1.95433151	0.082946904	0.378738321	-1.447576669	0.418617147	1
8.99361735405374e-05	NC_044374.1	4649201	4651799	+	39.3183	2598	Intergenic	Intergenic	17065	LOC115716004	LOC115716004	XM_030644692	uncharacterized LOC115716004,	protein_coding	0.305500595	1	1	0.306341084	1	1
2.930895034893281e-06	NC_044371.1	65787401	65789799	+	39.2968	2398	Intergenic	Intergenic	-5332	LOC115704248	LOC115704248	XM_030631464	protein MID1-COMPLEMENTING ACTIVITY 1-like	protein_coding	-1.558127788	0.361433076	1	-0.871183481	1	1
3.1622320064034e-06	NC_044372.1	39955001	39959599	+	39.287	4598	Intergenic	Intergenic	-16594	LOC115708653	LOC115708653	XM_030636635	E3 ubiquitin-protein ligase UPL4,	protein_coding	-0.69750496	1	1	-0.181407999	1	1
0.00010913513966608494	NC_044378.1	61315601	61317799	+	39.2821	2198	Intergenic	Intergenic	-50057	LOC115696702	LOC115696702	XM_030623592	putative disease resistance protein At1g50180	protein_coding	NA	NA	NA	NA	NA	NA
1.0369722560838378e-07	NC_044374.1	3646801	3652199	+	39.2821	5398	Intergenic	Intergenic	2727	LOC115717472	LOC115717472	XM_030646457	uncharacterized protein At4g02000	protein_coding	NA	NA	NA	NA	NA	NA
0.00011344490019372926	NC_044377.1	56268001	56269999	+	39.2746	1998	Intergenic	Intergenic	5205	LOC115695286	LOC115695286	XM_030622361	uncharacterized LOC115695286	protein_coding	NA	NA	NA	NA	NA	NA
0.00011344490019372926-2	NC_044379.1	53229401	53231799	+	39.2746	2398	Intergenic	Intergenic	7101	LOC115700270	LOC115700270	XM_030627839	uncharacterized LOC115700270	protein_coding	NA	NA	NA	NA	NA	NA
0.0001179261798044921	NC_044377.1	19141801	19144399	+	39.2671	2598	Intergenic	Intergenic	19126	LOC115695029	LOC115695029	XM_030622127	uncharacterized LOC115695029	protein_coding	NA	NA	NA	NA	NA	NA
0.0001225858699921113	NC_044372.1	72305601	72308599	+	39.2594	2998	Intergenic	Intergenic	53846	LOC115710902	LOC115710902	XM_030639253	uncharacterized LOC115710902	protein_coding	NA	NA	NA	NA	NA	NA
0.00012743114244967202	NC_044373.1	40923801	40925399	+	39.2517	1598	Intergenic	Intergenic	12144	LOC115713419	LOC115713419	XM_030641901	uncharacterized LOC115713419	protein_coding	NA	NA	NA	NA	NA	NA
4.452235309979698e-06	NC_044379.1	62697201	62700599	+	39.2413	3398	Intergenic	Intergenic	-2066	LOC115699018	LOC115699018	XM_030626228	SNF1-related protein kinase catalytic subunit alpha KIN10	protein_coding	-0.383887075	1	1	-0.165922897	1	1
0.00013770859181435493	NC_044378.1	48363201	48365399	+	39.2361	2198	Intergenic	Intergenic	-61297	LOC115696615	LOC115696615	XM_030623510	uncharacterized LOC115696615	protein_coding	NA	NA	NA	NA	NA	NA
4.804219935811029e-06	NC_044377.1	18363401	18367199	+	39.2308	3798	Intergenic	Intergenic	-49658	LOC115724970	LOC115724970	XM_030654357	putative DUF21 domain-containing protein At3g13070, chloroplastic,	protein_coding	0.655792719	1	1	0.539079078	1	1
0.00014315661963380604-2	NC_044379.1	12451401	12453599	+	39.2281	2198	TTS	-TTS (LOC115699844)	1108	LOC115699844	LOC115699844	XM_030627387	zinc finger BED domain-containing protein RICESLEEPER 2-like	protein_coding	0	1	NA	-0.410947537	1	NA
0.00014315661963380604	NC_044378.1	21683001	21685399	+	39.2281	2398	Intergenic	Intergenic	38167	LOC115696423	LOC115696423	XM_030623325	uncharacterized LOC115696423	protein_coding	NA	NA	NA	NA	NA	NA
0.00015471336069039935	NC_044374.1	6503601	6506399	+	39.212	2798	Intergenic	Intergenic	-14289	LOC115716850	LOC115716850	XM_030645755	UPF0496 protein At3g49070-like	protein_coding	0.595132183	1	1	-2.943587446	0.172704687	0.805997136
0.00015471336069039935-2	NC_044374.1	60141601	60144399	+	39.212	2798	Intergenic	Intergenic	-313155	LOC115717877	LOC115717877	XM_030646848	uncharacterized LOC115717877	protein_coding	NA	NA	NA	NA	NA	NA
2.285909663046621e-07	NC_044373.1	39304601	39309199	+	39.1996	4598	Intergenic	Intergenic	25098	LOC115713405	LOC115713405	XM_030641889	vacuolar-processing enzyme alpha-isozyme-like	protein_coding	-4.772401327	0.335707079	1	0	1	1
0.00016721119168046394-2	NC_044379.1	18168601	18171199	+	39.1955	2598	Intergenic	Intergenic	-51639	LOC115701038	LOC115701038	XR_004008494	uncharacterized LOC115701038	lncRNA	NA	NA	NA	NA	NA	NA
0.00016721119168046394	NC_044371.1	45374201	45376799	+	39.1955	2598	Intergenic	Intergenic	-10481	LOC115707337	LOC115707337	XM_030635265	protein saal1,	protein_coding	-1.228936117	0.160891404	0.649478256	-0.586145184	1	1
0.00017383697803057853	NC_044372.1	55940601	55942799	+	39.1871	2198	Intergenic	Intergenic	65491	LOC115711787	LOC115711787	XR_004010662	small nucleolar RNA R71	snoRNA	NA	NA	NA	NA	NA	NA
0.00017383697803057853-2	NC_044374.1	77187601	77189799	+	39.1871	2198	Intergenic	Intergenic	361342	LOC115718006	LOC115718006	XM_030646974	uncharacterized LOC115718006	protein_coding	0	1	NA	-0.410947537	1	NA
6.514794193239859e-06	NC_044374.1	5173001	5175199	+	39.1871	2198	Intergenic	Intergenic	3961	LOC115717499	LOC115717499	XM_030646485	uncharacterized LOC115717499	protein_coding	1.549169232	0.892939793	NA	1.512629836	0.90002605	NA
4.2464923240946453e-10	NC_044376.1	13121201	13130199	+	39.1871	8998	Intergenic	Intergenic	-67981	LOC115723581	LOC115723581	XM_030653069	uncharacterized mitochondrial protein AtMg00860-like	protein_coding	NA	NA	NA	NA	NA	NA
0.00018072757957568383	NC_044376.1	45714201	45716399	+	39.1786	2198	Intergenic	Intergenic	-6285	LOC115724272	LOC115724272	XR_004013071	small nucleolar RNA R71	snoRNA	NA	NA	NA	NA	NA	NA
0.00018789369365387762	NC_044376.1	47068601	47070799	+	39.17	2198	promoter-TSS	-promoter-TSS (LOC115723233)	-625	LOC115723233	LOC115723233	XR_004012924	uncharacterized LOC115723233	lncRNA	NA	NA	NA	NA	NA	NA
7.3037657988049186e-06	NC_044377.1	7198801	7202199	+	39.17	3398	Intergenic	Intergenic	-10585	LOC115725597	LOC115725597	XR_004013428	uncharacterized LOC115725597	lncRNA	0	1	NA	-3.829624827	0.379208599	NA
0.00019534645554810764-3	NC_044376.1	36835601	36838199	+	39.1614	2598	Intergenic	Intergenic	-6529	LOC115722660	LOC115722660	XM_030651923	reticulocalbin-2,	protein_coding	-0.208924844	1	1	-0.55641695	1	1
0.00019534645554810764	NC_044372.1	73183801	73186399	+	39.1614	2598	Intergenic	Intergenic	-48806	LOC115711788	LOC115711788	XR_004010663	small nucleolar RNA R71	snoRNA	NA	NA	NA	NA	NA	NA
3.2090560409064393e-07	NW_022060465.1	358401	363599	+	39.1614	5198	Intergenic	Intergenic	-124170	LOC115702146	LOC115702146	XM_030629603	#N/A	protein_coding	-0.974224598	1	1	-1.745576005	0.000130054	0.001963887
0.00019534645554810764-2	NC_044375.1	51563201	51565199	+	39.1614	1998	TTS	-TTS (LOC115720176)	1502	LOC115720176	LOC115720176	XM_030649333	uncharacterized LOC115720176	protein_coding	NA	NA	NA	NA	NA	NA
5.672999661778069e-14	NC_044373.1	37011201	37020799	+	39.1565	9598	Intergenic	Intergenic	34597	LOC115712923	LOC115712923	XM_030641341	glutamate decarboxylase 5	protein_coding	-0.610568044	1	1	-3.060856015	0.004126644	0.038620486
8.18873117147454e-06	NW_022060329.1	159001	162399	+	39.1526	3398	Intergenic	Intergenic	-23808	LOC115701979	LOC115701979	XR_004008776	#N/A	lncRNA	NA	NA	NA	NA	NA	NA
0.00020309745672303703	NC_044378.1	29521201	29522999	+	39.1526	1798	Intergenic	Intergenic	23926	LOC115696474	LOC115696474	XM_030623376	uncharacterized LOC115696474	protein_coding	NA	NA	NA	NA	NA	NA
0.00021115876383812657	NC_044375.1	82983401	82986599	+	39.1438	3198	Intergenic	Intergenic	-4187	LOC115718857	LOC115718857	XM_030647667	probable N-acetyltransferase HLS1	protein_coding	3.22001827	0.003469234	0.02463579	3.57636957	0.000946491	0.011148525
8.837779826145118e-06	NW_022060476.1	542601	546399	+	39.1408	3798	Intergenic	Intergenic	-187300	LOC115702188	LOC115702188	XM_030629636	#N/A	protein_coding	NA	NA	NA	NA	NA	NA
0.00021954293857089966-2	NC_044379.1	12016401	12018399	+	39.1348	1998	Intergenic	Intergenic	-10746	LOC115701013	LOC115701013	XR_004008486	uncharacterized LOC115701013	lncRNA	-0.374388901	1	1	-5.084775611	0.023368215	0.163407492
0.00021954293857089966	NC_044378.1	43997601	43999999	+	39.1348	2398	Intergenic	Intergenic	18516	LOC115696589	LOC115696589	XM_030623482	uncharacterized LOC115696589	protein_coding	NA	NA	NA	NA	NA	NA
4.3394105762951997e-07	NC_044370.1	31267601	31272999	+	39.1257	5398	Intergenic	Intergenic	-19935	LOC115702418	LOC115702418	XM_030629883	nodulation-signaling pathway 2 protein	protein_coding	-5.217589476	0.000600719	0.005192279	-2.028306613	0.425540094	1
0.00022826305828587903	NC_044378.1	44662601	44665399	+	39.1257	2798	Intergenic	Intergenic	70120	LOC115696593	LOC115696593	XM_030623486	uncharacterized LOC115696593	protein_coding	NA	NA	NA	NA	NA	NA
0.00023733273758640172	NC_044373.1	7008201	7010599	+	39.1166	2398	Intergenic	Intergenic	-3597	LOC115715427	LOC115715427	XR_004011298	small nucleolar RNA R71	snoRNA	NA	NA	NA	NA	NA	NA
0.00023733273758640172-2	NC_044379.1	1508801	1511599	+	39.1166	2798	Intergenic	Intergenic	-1097397	LOC115698860	LOC115698860	XM_030626068	amino acid transporter AVT1I	protein_coding	1.967867848	0.196163411	0.757198644	3.391531314	0.001859284	0.019698994
2.268873279605306e-08	NC_044370.1	33020801	33026799	+	39.1129	5998	Intergenic	Intergenic	2576	LOC115719859	LOC115719859	XM_030649040	uncharacterized LOC115719859	protein_coding	0	1	NA	-1.340197996	0.932810208	NA
0.00024676615078811506	NC_044370.1	68787401	68788999	+	39.1073	1598	Intergenic	Intergenic	51824	LOC115703351	LOC115703351	XR_004009123	small nucleolar RNA R71	snoRNA	NA	NA	NA	NA	NA	NA
0.0002667838163385881	NC_044371.1	15641201	15644399	+	39.0885	3198	Intergenic	Intergenic	-37508	LOC115706180	LOC115706180	XM_030633735	#N/A	protein_coding	0.552916827	1	1	0.595501274	1	1
0.0002667838163385881-2	NC_044374.1	11457201	11458799	+	39.0885	1598	Intergenic	Intergenic	14889	LOC115715628	LOC115715628	XM_030644286	cyclin-U2-1	protein_coding	-2.926901486	0.059828648	0.288531387	0.379356442	1	1
1.2460908262292554e-05	NC_044379.1	22336001	22338199	+	39.0853	2198	Intergenic	Intergenic	-108937	LOC115698904	LOC115698904	XM_030626103	#N/A	protein_coding	-0.37438412	1	NA	-0.410947537	1	NA
1.2946203961704254e-05	NC_044379.1	169001	172599	+	39.0789	3598	Intergenic	Intergenic	140044	LOC115700627	LOC115700627	XM_030628235	protein sym-1	protein_coding	0.016917343	1	1	0.181563454	1	1
0.00027739943187037676-2	NC_044378.1	24105401	24106599	+	39.0789	1198	Intergenic	Intergenic	-24897	LOC115697396	LOC115697396	XM_030624376	auxin response factor 3	protein_coding	-0.538936687	1	1	0.179745306	1	1
0.00027739943187037676	NC_044375.1	43252001	43254399	+	39.0789	2398	Intergenic	Intergenic	-541795	LOC115721317	LOC115721317	XM_030650591	tropomyosin-2-like	protein_coding	-1.940454338	0.414144069	1	-0.234417585	1	1
6.573507287561194e-07	NC_044370.1	40959801	40963599	+	39.0741	3798	Intergenic	Intergenic	-7725	LOC115702583	LOC115702583	XR_004008928	uncharacterized LOC115702583	lncRNA	0	1	1	-6.669116088	0.002220071	0.022821619
0.00029992754514872197-2	NC_044372.1	647601	649799	+	39.0594	2198	exon	-exon (LOC115709475, exon 3 of 5)	1037	LOC115709475	LOC115709475	XM_030637592	uncharacterized LOC115709475	protein_coding	NA	NA	NA	NA	NA	NA
0.00029992754514872197-3	NC_044375.1	2261401	2263999	+	39.0594	2598	Intergenic	Intergenic	-13012	LOC115720836	LOC115720836	XM_030650024	uncharacterized protein At4g22758	protein_coding	-0.714087764	1	1	-0.44799629	1	1
0.00029992754514872197	NC_044371.1	62995601	62997799	+	39.0594	2198	Intergenic	Intergenic	16361	LOC115704206	LOC115704206	XM_030631423	putative disease resistance RPP13-like protein 1	protein_coding	-2.749223927	0.372157751	1	-5.066236407	0.030759136	0.20587844
0.0003118754495888875	NC_044372.1	64187601	64189399	+	39.0495	1798	Intergenic	Intergenic	-20029	LOC115709278	LOC115709278	XM_030637341	DNAJ protein JJJ1 homolog,	protein_coding	0.570618804	1	1	0.490815092	1	1
4.2920397073299506e-08	NC_044370.1	20747601	20752799	+	39.0475	5198	Intergenic	Intergenic	-7216	LOC115717929	LOC115717929	XM_030646898	uncharacterized LOC115717929	protein_coding	0.587405102	1	NA	-2.318046374	0.52383738	NA
4.4561434054092494e-08	NC_044372.1	67237601	67243799	+	39.0434	6198	promoter-TSS	-promoter-TSS (LOC115710876)	-1258	LOC115710876	LOC115710876	XM_030639229	uncharacterized LOC115710876	protein_coding	NA	NA	NA	NA	NA	NA
0.00033723302553320645	NC_044370.1	36086401	36088799	+	39.0292	2398	Intergenic	Intergenic	-41348	LOC115720095	LOC115720095	XM_030649261	uncharacterized LOC115720095	protein_coding	NA	NA	NA	NA	NA	NA
0.00035068267977521735-4	NC_044378.1	41478401	41480999	+	39.019	2598	Intergenic	Intergenic	11059	LOC115697776	LOC115697776	XM_030624901	ras-related protein RABF2a	protein_coding	-0.194302364	1	1	-0.052005831	1	1
0.00035068267977521735	NC_044372.1	61560401	61562599	+	39.019	2198	Intergenic	Intergenic	-2566	LOC115711782	LOC115711782	XR_004010657	small nucleolar RNA R71	snoRNA	NA	NA	NA	NA	NA	NA
0.00035068267977521735-3	NC_044373.1	81815201	81817399	+	39.019	2198	exon	-exon (LOC115713757, exon 6 of 7)	975	LOC115713757	LOC115713757	XM_030642239	uncharacterized LOC115713757	protein_coding	NA	NA	NA	NA	NA	NA
0.00035068267977521735-5	NC_044379.1	8415801	8417799	+	39.019	1998	intron	-intron (LOC115699803, intron 1 of 3)	3074	LOC115699803	LOC115699803	XM_030627347	uncharacterized LOC115699803	protein_coding	NA	NA	NA	NA	NA	NA
0.00035068267977521735-2	NC_044373.1	10257001	10259799	+	39.019	2798	Intergenic	Intergenic	-71258	LOC115715387	LOC115715387	XR_004011261	small nucleolar RNA R71	snoRNA	NA	NA	NA	NA	NA	NA
0.0003646742856307765	NC_044371.1	27280201	27282199	+	39.0086	1998	Intergenic	Intergenic	-24977	LOC115706803	LOC115706803	XR_004009654	uncharacterized LOC115706803	lncRNA	NA	NA	NA	NA	NA	NA
0.0003646742856307765-2	NC_044371.1	43785401	43787399	+	39.0086	1998	intron	-intron (LOC115708062, intron 3 of 3)	5285	LOC115708062	LOC115708062	XM_030636234	peroxidase 4	protein_coding	-8.396689599	2.63282E-09	5.54941E-08	-0.920844637	1	1
0.0003646742856307765-3	NC_044377.1	33530201	33531999	+	39.0086	1798	Intergenic	Intergenic	-185929	LOC115695108	LOC115695108	XM_030622198	uncharacterized LOC115695108	protein_coding	NA	NA	NA	NA	NA	NA
0.00037922996576239434	NC_044374.1	77161001	77163399	+	38.998	2398	Intergenic	Intergenic	387842	LOC115718006	LOC115718006	XM_030646974	uncharacterized LOC115718006	protein_coding	0	1	NA	-0.410947537	1	NA
0.00037922996576239434-2	NC_044375.1	73797201	73799199	+	38.998	1998	Intergenic	Intergenic	-3228	LOC115719631	LOC115719631	XM_030648741	tropinone reductase homolog At5g06060,	protein_coding	0.270489874	1	1	-0.372019819	1	1
0.00039437276095595643-4	NC_044379.1	26839401	26841799	+	38.9874	2398	Intergenic	Intergenic	72427	LOC115701382	LOC115701382	XM_030629164	FT-interacting protein 3,	protein_coding	-0.165402439	1	1	0.351433937	1	1
0.00039437276095595643-3	NC_044376.1	14277401	14280199	+	38.9874	2798	Intergenic	Intergenic	-8571	LOC115723593	LOC115723593	XM_030653080	uncharacterized LOC115723593	protein_coding	NA	NA	NA	NA	NA	NA
0.00039437276095595643	NC_044372.1	36514201	36516199	+	38.9874	1998	Intergenic	Intergenic	26322	LOC115711855	LOC115711855	XR_004010723	small nucleolar RNA R71	snoRNA	NA	NA	NA	NA	NA	NA
0.00039437276095595643-2	NC_044375.1	29751401	29753199	+	38.9874	1798	Intergenic	Intergenic	45842	LOC115721449	LOC115721449	XR_004012472	small nucleolar RNA R71	snoRNA	NA	NA	NA	NA	NA	NA
2.298250929083519e-05	NC_044373.1	43517601	43518799	+	38.9766	1198	Intergenic	Intergenic	272207	LOC115713438	LOC115713438	XM_030641921	uncharacterized LOC115713438	protein_coding	-0.374376113	1	NA	0	1	NA
2.298250929083519e-05-2	NC_044373.1	43519601	43521199	+	38.9766	1598	Intergenic	Intergenic	274407	LOC115713438	LOC115713438	XM_030641921	uncharacterized LOC115713438	protein_coding	-0.374376113	1	NA	0	1	NA
0.0004101266690482574	NC_044378.1	16435001	16437199	+	38.9766	2198	Intergenic	Intergenic	35504	LOC115698025	LOC115698025	XM_030625205	urease accessory protein D	protein_coding	0.477142797	1	1	0.445405739	1	1
0.00042651668555177674	NC_044370.1	860001	861999	+	38.9656	1998	Intergenic	Intergenic	32168	LOC115702698	LOC115702698	XM_030630123	uncharacterized LOC115702698	protein_coding	0.104370998	1	1	0.506757408	1	1
0.00042651668555177674-2	NC_044374.1	43134801	43137599	+	38.9656	2798	Intergenic	Intergenic	-161728	LOC115718204	LOC115718204	XR_004011788	small nucleolar RNA R71	snoRNA	NA	NA	NA	NA	NA	NA
1.5106362548370934e-06	NC_044372.1	49550401	49555399	+	38.9601	4998	Intergenic	Intergenic	-13290	LOC115709908	LOC115709908	XM_030638163	#N/A	protein_coding	-0.389284925	1	1	-0.674477316	1	1
0.0004435688460533917-2	NC_044378.1	37301801	37303599	+	38.9546	1798	Intergenic	Intergenic	-18065	LOC115696541	LOC115696541	XM_030623437	pentatricopeptide repeat-containing protein At3g22670, mitochondrial-like	protein_coding	NA	NA	NA	NA	NA	NA
0.0004435688460533917	NC_044374.1	77675201	77677199	+	38.9546	1998	Intergenic	Intergenic	-6944	LOC115718322	LOC115718322	XR_004011901	small nucleolar RNA R71	snoRNA	NA	NA	NA	NA	NA	NA
2.5783054470578056e-05	NC_044372.1	24074601	24077599	+	38.9546	2998	Intergenic	Intergenic	-23095	LOC115710557	LOC115710557	XM_030638918	uncharacterized protein K02A2.6-like	protein_coding	NA	NA	NA	NA	NA	NA
0.0004613102704674406-2	NC_044373.1	71492001	71494799	+	38.9434	2798	exon	-exon (LOC115713643, exon 1 of 3)	755	LOC115713643	LOC115713643	XM_030642130	uncharacterized LOC115713643	protein_coding	NA	NA	NA	NA	NA	NA
0.0004613102704674406	NC_044373.1	64784201	64786399	+	38.9434	2198	Intergenic	Intergenic	16582	LOC115713572	LOC115713572	XM_030642060	vegetative cell wall protein gp1-like	protein_coding	NA	NA	NA	NA	NA	NA
2.7838280143838205e-05	NC_044372.1	78436001	78440199	+	38.9396	4198	promoter-TSS	-promoter-TSS (LOC115710958)	-1070	LOC115710958	LOC115710958	XM_030639310	uncharacterized LOC115710958	protein_coding	0	1	NA	-0.410947537	1	NA
2.892687540819653e-05	NC_044378.1	22828001	22829799	+	38.932	1798	Intergenic	Intergenic	40234	LOC115698411	LOC115698411	XR_004008159	small nucleolar RNA R71	snoRNA	NA	NA	NA	NA	NA	NA
8.729223154745321e-09	NC_044374.1	38951201	38956399	+	38.9205	5198	exon	-exon (LOC115715830, exon 7 of 11)	2525	LOC115715830	LOC115715830	XM_030644497	uncharacterized LOC115715830	protein_coding	1.119422719	0.772643322	1	1.081122848	0.844352883	1
0.0004989750915041411	NC_044370.1	14267001	14269799	+	38.9205	2798	Intergenic	Intergenic	-20757	LOC115703559	LOC115703559	XM_030630791	aluminum-activated malate transporter 13	protein_coding	-4.749366952	4.31743E-07	6.50933E-06	3.821867948	0.006457002	0.05611345
3.123418110732357e-05	NC_044372.1	36056201	36059399	+	38.9167	3198	Intergenic	Intergenic	-7052	LOC115710038	LOC115710038	XM_030638348	protein fluG-like,	protein_coding	-1.765272186	0.187634392	0.733556215	-1.862567806	0.137485384	0.676908915
2.045454917580006e-06	NC_044375.1	64366801	64368999	+	38.9147	2198	Intergenic	Intergenic	16062	LOC115718790	LOC115718790	XM_030647615	sulfite reductase [ferredoxin], chloroplastic	protein_coding	0.875031067	1	1	1.465521297	0.002456922	0.024870676
2.045454917580006e-06-2	NC_044375.1	64370001	64371799	+	38.9147	1798	Intergenic	Intergenic	13062	LOC115718790	LOC115718790	XM_030647615	sulfite reductase [ferredoxin], chloroplastic	protein_coding	0.875031067	1	1	1.465521297	0.002456922	0.024870676
3.245634829871008e-05	NC_044379.1	7390601	7394799	+	38.9089	4198	Intergenic	Intergenic	-16779	LOC115701781	LOC115701781	XR_004008761	small nucleolar RNA R71	snoRNA	NA	NA	NA	NA	NA	NA
0.0005189585755439016	NC_044379.1	21922801	21924999	+	38.9089	2198	Intergenic	Intergenic	13544	LOC115701659	LOC115701659	XR_004008650	small nucleolar RNA R71	snoRNA	NA	NA	NA	NA	NA	NA
7.018112693609944e-10	NC_044379.1	15687801	15695799	+	38.9056	7998	Intergenic	Intergenic	-66560	LOC115699882	LOC115699882	XM_030627424	uncharacterized LOC115699882	protein_coding	NA	NA	NA	NA	NA	NA
0.0005397516012217624	NC_044371.1	72221601	72223399	+	38.8971	1798	Intergenic	Intergenic	-20961	LOC115704339	LOC115704339	XM_030631550	uncharacterized LOC115704339	protein_coding	NA	NA	NA	NA	NA	NA
0.0005397516012217624-2	NC_044373.1	41458601	41460399	+	38.8971	1798	Intergenic	Intergenic	53541	LOC115715294	LOC115715294	XM_030644145	heavy metal-associated isoprenylated plant protein 22	protein_coding	2.127777094	4.81496E-08	8.46051E-07	-0.136217128	1	1
0.0005397516012217624-4	NC_044376.1	29483401	29486399	+	38.8971	2998	Intergenic	Intergenic	12089	LOC115721767	LOC115721767	XM_030650845	pentatricopeptide repeat-containing protein At1g71420	protein_coding	-0.584822815	1	1	0.049930494	1	1
0.0005397516012217624-3	NC_044373.1	41655801	41658199	+	38.8971	2398	Intergenic	Intergenic	-45876	LOC115713428	LOC115713428	XM_030641908	uncharacterized mitochondrial protein AtMg00860-like	protein_coding	NA	NA	NA	NA	NA	NA
0.0005613874449132675	NC_044377.1	66358201	66360799	+	38.8852	2598	Intergenic	Intergenic	-58102	LOC115725015	LOC115725015	XM_030654417	BRASSINOSTEROID INSENSITIVE 1-associated receptor kinase 1	protein_coding	0.057166383	1	1	-0.087463189	1	1
0.0005839007767899233-2	NC_044379.1	26244401	26246199	+	38.8731	1798	Intergenic	Intergenic	-7889	LOC115699241	LOC115699241	XM_030626538	uncharacterized LOC115699241	protein_coding	0.561970479	1	1	0.492796498	1	1
0.0005839007767899233	NC_044377.1	25632401	25634999	+	38.8731	2598	Intergenic	Intergenic	44231	LOC115696115	LOC115696115	XR_004007710	small nucleolar RNA R71	snoRNA	NA	NA	NA	NA	NA	NA
4.247043741313232e-05	NC_044374.1	27202601	27206999	+	38.8526	4398	promoter-TSS	-promoter-TSS (LOC115717680)	-365	LOC115717680	LOC115717680	XM_030646662	uncharacterized mitochondrial protein AtMg00810-like	protein_coding	NA	NA	NA	NA	NA	NA
0.000631705916405088	NC_044378.1	42324601	42326799	+	38.8485	2198	Intergenic	Intergenic	10034	LOC115697720	LOC115697720	XM_030624818	protein CHUP1, chloroplastic	protein_coding	0.317982349	1	1	-2.751929969	0.000417105	0.005495557
0.0006570745853344557	NC_044370.1	85707801	85709599	+	38.8359	1798	Intergenic	Intergenic	-37169	LOC115725385	LOC115725385	XM_030654898	transport inhibitor response 1-like protein,	protein_coding	-0.31761592	1	1	-0.187859263	1	1
3.479031010616254e-06	NC_044376.1	29721801	29726199	+	38.8295	4398	Intergenic	Intergenic	-37586	LOC115723746	LOC115723746	XM_030653222	uncharacterized LOC115723746	protein_coding	NA	NA	NA	NA	NA	NA
4.766435980278017e-05	NC_044374.1	37403201	37405199	+	38.8274	1998	intron	-intron (LOC115717726, intron 2 of 2)	2375	LOC115717726	LOC115717726	XM_030646706	uncharacterized LOC115717726	protein_coding	NA	NA	NA	NA	NA	NA
3.613688785938806e-06	NC_044374.1	85443401	85447599	+	38.8231	4198	Intergenic	Intergenic	-131796	LOC115716182	LOC115716182	XM_030644921	uncharacterized LOC115716182	protein_coding	-2.148277376	0.003082854	0.022120827	-2.012420156	0.009106107	0.074678623
4.953403738274355e-05-2	NC_044376.1	32277001	32280599	+	38.8189	3598	Intergenic	Intergenic	-25487	LOC115723765	LOC115723765	XM_030653238	E3 ubiquitin protein ligase DRIP2-like	protein_coding	NA	NA	NA	NA	NA	NA
4.953403738274355e-05	NC_044370.1	96561801	96565199	+	38.8189	3398	promoter-TSS	-promoter-TSS (LOC115698790)	-1137	LOC115698790	LOC115698790	XM_030625971	uncharacterized LOC115698790,	protein_coding	0.560092078	1	1	0.506246239	1	1
2.919418237109135e-07	NC_044376.1	44059001	44063399	+	38.8154	4398	Intergenic	Intergenic	85890	LOC115722339	LOC115722339	XR_004012813	uncharacterized LOC115722339	lncRNA	NA	NA	NA	NA	NA	NA
5.147751278333788e-05	NC_044374.1	15449401	15453199	+	38.8102	3798	Intergenic	Intergenic	-9887	LOC115715967	LOC115715967	XM_030644645	protein HOTHEAD-like	protein_coding	0	1	1	-5.920325086	0.010332604	0.082898013
0.0007109485467156685-2	NC_044374.1	40439801	40442199	+	38.8102	2398	Intergenic	Intergenic	16068	LOC115716569	LOC115716569	XM_030645388	endoribonuclease YBEY, chloroplastic,	protein_coding	0.797953488	1	1	0.820259288	1	1
0.0007109485467156685	NC_044371.1	45451001	45453199	+	38.8102	2198	promoter-TSS	-promoter-TSS (LOC115708389)	-344	LOC115708389	LOC115708389	XR_004009890	small nucleolar RNA R71	snoRNA	NA	NA	NA	NA	NA	NA
0.0007109485467156685-3	NC_044376.1	35929201	35930999	+	38.8102	1798	Intergenic	Intergenic	26514	LOC115722879	LOC115722879	XM_030652230	probable serine/threonine-protein kinase WNK9	protein_coding	1.41658871	0.038826263	0.199614135	0.575784068	1	1
5.349772082497139e-05-2	NC_044378.1	69747401	69748999	+	38.8015	1598	Intergenic	Intergenic	7916	LOC115696812	LOC115696812	XM_030623694	uncharacterized LOC115696812	protein_coding	-1.296408661	0.86156992	1	-2.931868884	0.225309928	0.980559824
5.349772082497139e-05	NC_044375.1	75131401	75133999	+	38.8015	2598	Intergenic	Intergenic	-33768	LOC115718686	LOC115718686	XM_030647507	U-box domain-containing protein 13	protein_coding	0.312498342	1	1	0.65882225	1	1
1.734759740394377e-10-2	NC_044378.1	10545801	10548599	+	38.8004	2798	Intergenic	Intergenic	-22382	LOC115697853	LOC115697853	XM_030625008	uncharacterized LOC115697853	protein_coding	3.174805959	8.64182E-09	1.67969E-07	-0.256414065	1	1
1.734759740394377e-10	NC_044378.1	10540801	10544799	+	38.8004	3998	Intergenic	Intergenic	-26782	LOC115697853	LOC115697853	XM_030625008	uncharacterized LOC115697853	protein_coding	3.174805959	8.64182E-09	1.67969E-07	-0.256414065	1	1
0.0007395408173935738-2	NC_044377.1	12923801	12925799	+	38.7971	1998	Intergenic	Intergenic	13074	LOC115695184	LOC115695184	XR_004007503	uncharacterized LOC115695184	lncRNA	0	1	NA	-1.2634132	0.94803931	NA
0.0007395408173935738	NC_044376.1	33947201	33949199	+	38.7971	1998	Intergenic	Intergenic	-36102	LOC115722699	LOC115722699	XM_030651978	serine/threonine-protein kinase STY13,	protein_coding	-0.058306541	1	1	1.490188882	0.002347526	0.023977947
5.559771411485121e-05	NC_044370.1	88927601	88931599	+	38.7927	3998	Intergenic	Intergenic	15499	LOC115703353	LOC115703353	XR_004009125	small nucleolar RNA R71	snoRNA	NA	NA	NA	NA	NA	NA
4.369650015322682e-06	NC_044377.1	43310801	43313999	+	38.7905	3198	Intergenic	Intergenic	-252181	LOC115695201	LOC115695201	XM_030622286	uncharacterized LOC115695201	protein_coding	NA	NA	NA	NA	NA	NA
0.0008002673174632418-2	NC_044377.1	8015001	8016999	+	38.7704	1998	Intergenic	Intergenic	34849	LOC115724840	LOC115724840	XM_030654197	NADP-dependent glyceraldehyde-3-phosphate dehydrogenase	protein_coding	1.984668992	1.59895E-05	0.000187304	1.593673033	0.009273117	0.075633707
0.0008002673174632418	NC_044375.1	22918401	22920199	+	38.7704	1798	Intergenic	Intergenic	-12960	LOC115718900	LOC115718900	XR_004012084	uncharacterized LOC115718900	lncRNA	2.97362777	0.198744118	0.765162864	0.853077693	1	1
5.087268546106336e-06	NC_044378.1	34500001	34504599	+	38.7636	4598	Intergenic	Intergenic	15908	LOC115697872	LOC115697872	XM_030625034	2-(3-amino-3-carboxypropyl)histidine synthase subunit 2,	protein_coding	0.405053374	1	1	0.548128264	1	1
0.000832500012820142	NC_044370.1	95306801	95308599	+	38.7568	1798	Intergenic	Intergenic	-27096	LOC115695597	LOC115695597	XM_030622654	uncharacterized LOC115695597	protein_coding	NA	NA	NA	NA	NA	NA
0.000832500012820142-2	NC_044372.1	29744201	29746599	+	38.7568	2398	Intergenic	Intergenic	-12036	LOC115710596	LOC115710596	XM_030638954	uncharacterized LOC115710596	protein_coding	NA	NA	NA	NA	NA	NA
0.0008660481358419295	NW_022060454.1	1355801	1356999	+	38.743	1198	Intergenic	Intergenic	-145792	LOC115702125	LOC115702125	XM_030629583	#N/A	protein_coding	0.642329408	1	1	-2.642988593	0.003486277	0.033308503
0.0009009662867284296-2	NC_044377.1	44903401	44905199	+	38.729	1798	Intergenic	Intergenic	-6968	LOC115696013	LOC115696013	XR_004007615	small nucleolar RNA R71	snoRNA	NA	NA	NA	NA	NA	NA
0.0009009662867284296	NC_044371.1	75733201	75734999	+	38.729	1798	Intergenic	Intergenic	-7670	LOC115708448	LOC115708448	XR_004009947	small nucleolar RNA R71	snoRNA	NA	NA	NA	NA	NA	NA
7.281511084064775e-05	NC_044375.1	39197201	39198599	+	38.729	1398	Intergenic	Intergenic	-37660	LOC115719457	LOC115719457	XM_030648518	ABC transporter G family member 3	protein_coding	-1.450857642	0.052481985	0.258549767	-0.395598801	1	1
6.639611254967948e-06	NC_044372.1	52396001	52399599	+	38.7148	3598	Intergenic	Intergenic	38448	LOC115709011	LOC115709011	XR_004010140	uncharacterized LOC115709011	lncRNA	-3.730387421	0.097968337	0.435231188	-0.919302768	1	1
7.164894567734513e-06	NC_044378.1	64719001	64722599	+	38.7004	3598	Intergenic	Intergenic	155025	LOC115697068	LOC115697068	XM_030623976	F-box protein SKIP19	protein_coding	-0.945414625	1	1	-0.569893046	1	1
0.0009751427595906377	NC_044379.1	6891401	6893999	+	38.7004	2598	Intergenic	Intergenic	-94563	LOC115699783	LOC115699783	XM_030627328	uncharacterized LOC115699783	protein_coding	NA	NA	NA	NA	NA	NA
8.496981462444416e-05	NC_044377.1	50712401	50716999	+	38.6906	4598	Intergenic	Intergenic	45062	LOC115695247	LOC115695247	XM_030622327	uncharacterized LOC115695247	protein_coding	NA	NA	NA	NA	NA	NA
0.0010145222770275785	NC_044379.1	20649001	20650999	+	38.6857	1998	Intergenic	Intergenic	35795	LOC115701663	LOC115701663	XR_004008653	small nucleolar RNA R71	snoRNA	NA	NA	NA	NA	NA	NA
8.831536933715675e-05-2	NC_044374.1	71532601	71535399	+	38.6808	2798	Intergenic	Intergenic	-8107	LOC115717965	LOC115717965	XM_030646933	uncharacterized LOC115717965	protein_coding	NA	NA	NA	NA	NA	NA
8.831536933715675e-05	NC_044374.1	57240201	57242599	+	38.6808	2398	Intergenic	Intergenic	127630	LOC115718233	LOC115718233	XR_004011817	small nucleolar RNA R71	snoRNA	NA	NA	NA	NA	NA	NA
8.032105029976917e-06	NC_044375.1	54930401	54933999	+	38.6783	3598	Intergenic	Intergenic	-61459	LOC115718674	LOC115718674	XM_030647495	zinc finger protein WIP5	protein_coding	-3.004878929	1.4631E-05	0.000173078	-1.200110357	0.673590619	1
0.0010555144297836132	NC_044371.1	65618401	65619999	+	38.6709	1598	Intergenic	Intergenic	-16357	LOC115704246	LOC115704246	XM_030631461	uncharacterized LOC115704246	protein_coding	NA	NA	NA	NA	NA	NA
0.0010555144297836132-2	NC_044372.1	27089201	27090599	+	38.6709	1398	Intergenic	Intergenic	104651	LOC115711472	LOC115711472	XM_030639813	transcription factor PIF7,	protein_coding	-0.176169755	1	1	2.886295042	9.40015E-05	0.001470293
9.17935824116124e-05	NC_044378.1	59855001	59857599	+	38.6709	2598	Intergenic	Intergenic	25635	LOC115696692	LOC115696692	XM_030623581	uncharacterized LOC115696692	protein_coding	NA	NA	NA	NA	NA	NA
9.540975941981548e-05	NC_044378.1	11530201	11532799	+	38.6609	2598	Intergenic	Intergenic	21329	LOC115697449	LOC115697449	XM_030624460	phosphatidylinositol:ceramide inositolphosphotransferase 1	protein_coding	-0.083275087	1	1	0.13980638	1	1
9.916942038494128e-05	NC_044376.1	17067401	17070199	+	38.6508	2798	promoter-TSS	-promoter-TSS (LOC115724238)	-1994	LOC115724238	LOC115724238	XR_004013039	small nucleolar RNA R71	snoRNA	NA	NA	NA	NA	NA	NA
0.0011426084941138295-3	NC_044379.1	10055201	10056799	+	38.6406	1598	Intergenic	Intergenic	9869	LOC115699817	LOC115699817	XM_030627360	uncharacterized LOC115699817	protein_coding	NA	NA	NA	NA	NA	NA
0.00010307830856465383	NC_044370.1	33683201	33685799	+	38.6406	2598	Intergenic	Intergenic	7567	LOC115719913	LOC115719913	XM_030649088	uncharacterized LOC115719913	protein_coding	-3.582976492	0.51143014	NA	0	1	NA
0.0011426084941138295	NC_044371.1	10212201	10213799	+	38.6406	1598	Intergenic	Intergenic	-15389	LOC115708406	LOC115708406	XR_004009908	small nucleolar RNA R71	snoRNA	NA	NA	NA	NA	NA	NA
0.0011426084941138295-2	NC_044377.1	54236001	54238199	+	38.6406	2198	Intergenic	Intergenic	10380	LOC115695274	LOC115695274	XM_030622351	uncharacterized LOC115695274	protein_coding	NA	NA	NA	NA	NA	NA
0.00011136791104673857	NC_044370.1	83827201	83829399	+	38.6199	2198	Intergenic	Intergenic	25982	LOC115703450	LOC115703450	XR_004009213	small nucleolar RNA R71	snoRNA	NA	NA	NA	NA	NA	NA
1.1759722746598488e-05	NC_044378.1	49365201	49368799	+	38.6015	3598	Intergenic	Intergenic	-15560	LOC115697836	LOC115697836	XM_030624978	berberine bridge enzyme-like 26	protein_coding	-2.677472906	0.002078299	0.015642577	-3.08540456	0.000118462	0.001811604
1.2248957897460577e-06	NC_044375.1	72497801	72501999	+	38.5967	4198	Intergenic	Intergenic	48923	LOC115718551	LOC115718551	XM_030647352	ankyrin repeat-containing protein ITN1-like,	protein_coding	NA	NA	NA	NA	NA	NA
0.001287121515167479-2	NC_044376.1	12088601	12090799	+	38.5934	2198	Intergenic	Intergenic	-2497	LOC115723292	LOC115723292	XM_030652732	alpha-galactosidase 1	protein_coding	0.260218544	1	1	0.074525233	1	1
0.001287121515167479	NC_044374.1	63132801	63134599	+	38.5934	1798	Intergenic	Intergenic	5492	LOC115717893	LOC115717893	XM_030646862	uncharacterized LOC115717893	protein_coding	NA	NA	NA	NA	NA	NA
0.001287121515167479-3	NC_044378.1	37611801	37612599	+	38.5934	798	Intergenic	Intergenic	57422	LOC115697262	LOC115697262	XM_030624196	uncharacterized LOC115697262	protein_coding	0.541043919	1	1	0.595343083	1	1
1.3720518894666108e-06	NC_044377.1	250201	254199	+	38.5773	3998	Intergenic	Intergenic	2468	LOC115725728	LOC115725728	XR_004013446	uncharacterized LOC115725728	lncRNA	0.990542267	1	1	0.127567208	1	1
0.001339306692568124-2	NC_044377.1	58290001	58291599	+	38.5773	1598	Intergenic	Intergenic	-102420	LOC115724685	LOC115724685	XM_030654024	vicianin hydrolase	protein_coding	-3.448208057	0.063337763	0.302720493	-6.077698009	7.33927E-05	0.001179213
0.001339306692568124	NC_044372.1	62729001	62731199	+	38.5773	2198	Intergenic	Intergenic	14502	LOC115710840	LOC115710840	XM_030639194	peptidyl-prolyl cis-trans isomerase NIMA-interacting 4-like	protein_coding	-1.839617553	0.62946369	1	-1.904385766	0.602799094	1
1.4249444845871595e-06	NC_044377.1	77103601	77108199	+	38.5707	4598	TTS	-TTS (LOC115725570)	1442	LOC115725570	LOC115725570	XR_004013425	uncharacterized LOC115725570	lncRNA	NA	NA	NA	NA	NA	NA
1.369935067511922e-05	NC_044377.1	26608801	26611599	+	38.5691	2798	Intergenic	Intergenic	38067	LOC115695070	LOC115695070	XM_030622164	uncharacterized LOC115695070	protein_coding	0	1	NA	-2.827337422	0.635620611	NA
1.7398058891063702e-08	NC_044370.1	73924401	73931199	+	38.5632	6798	Intergenic	Intergenic	-20511	LOC115714390	LOC115714390	XM_030643079	uncharacterized LOC115714390	protein_coding	NA	NA	NA	NA	NA	NA
0.001393640166454889-2	NC_044374.1	69639401	69641399	+	38.5608	1998	Intergenic	Intergenic	35246	LOC115716006	LOC115716006	XM_030644693	oxalate--CoA ligase	protein_coding	0.69813637	1	1	1.769820862	5.28883E-05	0.000881762
0.001393640166454889	NC_044373.1	75966201	75968399	+	38.5608	2198	Intergenic	Intergenic	15712	LOC115712699	LOC115712699	XM_030641029	probable LRR receptor-like serine/threonine-protein kinase At5g10290,	protein_coding	0.162266804	1	1	0.57196114	1	1
0.001393640166454889-3	NC_044379.1	55193801	55195999	+	38.5608	2198	promoter-TSS	-promoter-TSS (LOC115700582)	1159	LOC115700581	LOC115700581	XM_030628169	probable 2,3-bisphosphoglycerate-independent phosphoglycerate mutase,	protein_coding	0.236032967	1	1	0.931351942	1	1
0.0014502121555033053	NC_044377.1	41172801	41174399	+	38.5441	1598	Intergenic	Intergenic	72597	LOC115724718	LOC115724718	XR_004013262	uncharacterized LOC115724718	lncRNA	NA	NA	NA	NA	NA	NA
0.0001460441234566166	NC_044373.1	6446201	6448999	+	38.5441	2798	Intergenic	Intergenic	-9604	LOC115712387	LOC115712387	XM_030640660	T-complex protein 1 subunit epsilon	protein_coding	-0.491459898	1	1	0.303719624	1	1
3.9245596972212894e-13	NC_044372.1	12863201	12873599	+	38.5413	10398	Intergenic	Intergenic	4822	LOC115710451	LOC115710451	XM_030638814	uncharacterized LOC115710451	protein_coding	-1.143820885	0.971670632	NA	0	1	NA
0.00015181733603203	NC_044379.1	55246201	55248799	+	38.5329	2598	Intergenic	Intergenic	6566	LOC115699669	LOC115699669	XM_030627188	pentatricopeptide repeat-containing protein At3g02490, mitochondrial	protein_coding	-0.922584243	1	1	0.291675656	1	1
0.0015091167686953986-2	NC_044376.1	18195801	18197999	+	38.5272	2198	Intergenic	Intergenic	41774	LOC115723633	LOC115723633	XM_030653118	uncharacterized LOC115723633	protein_coding	NA	NA	NA	NA	NA	NA
0.0015091167686953986	NC_044375.1	92554601	92556199	+	38.5272	1598	Intergenic	Intergenic	-6150	LOC115719139	LOC115719139	XM_030648068	auxin response factor 4,	protein_coding	-0.75327475	1	1	0.778347572	1	1
0.0015091167686953986-3	NC_044376.1	43114001	43115799	+	38.5272	1798	Intergenic	Intergenic	7971	LOC115723848	LOC115723848	XM_030653314	uncharacterized LOC115723848	protein_coding	NA	NA	NA	NA	NA	NA
2.347016738204582e-08	NC_044376.1	46215201	46222399	+	38.5247	7198	Intergenic	Intergenic	13946	LOC115724325	LOC115724325	XR_004013122	small nucleolar RNA R71	snoRNA	NA	NA	NA	NA	NA	NA
0.00015782059659541871	NC_044370.1	89154001	89156199	+	38.5215	2198	Intergenic	Intergenic	41653	LOC115702838	LOC115702838	XR_004008959	uncharacterized LOC115702838	lncRNA	0.587405667	1	NA	-0.931928976	1	NA
0.0001640631624894469	NC_044378.1	31186801	31189199	+	38.51	2398	Intergenic	Intergenic	-99381	LOC115697279	LOC115697279	XM_030624218	UDP-arabinose 4-epimerase 1,	protein_coding	0.153630174	1	1	-0.026389832	1	1
0.0015704521791250839	NC_044378.1	39080601	39081999	+	38.51	1398	Intergenic	Intergenic	-12390	LOC115696556	LOC115696556	XM_030623451	uncharacterized LOC115696556	protein_coding	NA	NA	NA	NA	NA	NA
0.0001705546681692505	NC_044370.1	45930201	45932599	+	38.4984	2398	Intergenic	Intergenic	-112832	LOC115702462	LOC115702462	XM_030629911	putative lipid-transfer protein DIR1	protein_coding	NA	NA	NA	NA	NA	NA
0.0001705546681692505-2	NC_044370.1	87894001	87895999	+	38.4984	1998	Intergenic	Intergenic	37484	LOC115697056	LOC115697056	XM_030623969	ethylene-responsive transcription factor ERF014	protein_coding	-2.012433223	0.397266045	1	-4.026148366	0.009952	0.080246349
0.0001705546681692505-3	NC_044370.1	98461401	98464199	+	38.4984	2798	Intergenic	Intergenic	-3205	LOC115699288	LOC115699288	XM_030626621	2-hydroxy-6-oxo-2,4-heptadienoate hydrolase-like,	protein_coding	NA	NA	NA	NA	NA	NA
0.0001705546681692505-4	NC_044372.1	12484401	12486599	+	38.4984	2198	promoter-TSS	-promoter-TSS (LOC115709651)	-1675	LOC115709651	LOC115709651	XM_030637812	succinate dehydrogenase subunit 7B, mitochondrial	protein_coding	-0.468422234	1	1	-0.410735053	1	1
1.932185893457744e-05	NC_044377.1	63200801	63204399	+	38.4925	3598	Intergenic	Intergenic	34122	LOC115696137	LOC115696137	XR_004007730	small nucleolar RNA snoR114	snoRNA	NA	NA	NA	NA	NA	NA
1.932185893457744e-05-2	NC_044378.1	68363201	68366799	+	38.4925	3598	Intergenic	Intergenic	13898	LOC115697706	LOC115697706	XM_030624803	arginyl-tRNA--protein transferase 2	protein_coding	-0.486745562	1	1	-0.59304555	1	1
2.2442546141444146e-06	NC_044375.1	43888001	43891599	+	38.489	3598	Intergenic	Intergenic	94805	LOC115721317	LOC115721317	XM_030650591	tropomyosin-2-like	protein_coding	-1.940454338	0.414144069	1	-0.234417585	1	1
0.0001773051408036827	NC_044374.1	83209401	83211399	+	38.4866	1998	Intergenic	Intergenic	-10736	LOC115716874	LOC115716874	XM_030645785	28 kDa ribonucleoprotein, chloroplastic	protein_coding	1.92129643	6.11634E-06	7.70475E-05	1.196387823	0.333673561	1
2.0075114868302333e-05	NC_044370.1	97226801	97230599	+	38.4837	3798	Intergenic	Intergenic	-9635	LOC115703153	LOC115703153	XR_004009013	uncharacterized LOC115703153	lncRNA	NA	NA	NA	NA	NA	NA
0.0017008295048736382	NC_044372.1	60437801	60439199	+	38.4748	1398	Intergenic	Intergenic	-12866	LOC115711714	LOC115711714	XR_004010594	small nucleolar RNA R71	snoRNA	NA	NA	NA	NA	NA	NA
2.1671324510152453e-05	NC_044377.1	72958201	72961599	+	38.4658	3398	Intergenic	Intergenic	6121	LOC115724794	LOC115724794	XR_004013280	uncharacterized LOC115724794	lncRNA	NA	NA	NA	NA	NA	NA
0.000199216869114769	NC_044371.1	54910201	54912199	+	38.4506	1998	promoter-TSS	-promoter-TSS (LOC115704145)	-273	LOC115704145	LOC115704145	XM_030631362	uncharacterized LOC115704145	protein_coding	NA	NA	NA	NA	NA	NA
0.000199216869114769-2	NC_044375.1	21462401	21464599	+	38.4506	2198	Intergenic	Intergenic	-24962	LOC115719948	LOC115719948	XM_030649119	uncharacterized LOC115719948	protein_coding	0	1	NA	-1.183474883	0.963862251	NA
2.4308032692759082e-05	NC_044377.1	76546401	76549599	+	38.4384	3198	Intergenic	Intergenic	-7346	LOC115695892	LOC115695892	XM_030622993	agglutinin-1-like	protein_coding	0	1	NA	-2.494400559	0.706248257	NA
0.00020711191924298954	NC_044370.1	58594401	58597199	+	38.4384	2798	Intergenic	Intergenic	-9680	LOC115712930	LOC115712930	XM_030641361	purine permease 3	protein_coding	-0.479587552	1	1	-0.959630382	1	1
0.00020711191924298954-3	NC_044372.1	54629801	54631799	+	38.4384	1998	Intergenic	Intergenic	-45602	LOC115709748	LOC115709748	XM_030637941	putative phospholipid-transporting ATPase 9,	protein_coding	0.675134893	1	1	-2.15634464	0.000275576	0.003835911
0.0018422179309730228	NC_044372.1	65227201	65229399	+	38.4384	2198	Intergenic	Intergenic	-56308	LOC115711638	LOC115711638	XR_004010575	uncharacterized LOC115711638	lncRNA	0.544729904	1	1	0.556390074	1	1
0.00020711191924298954-2	NC_044372.1	54038401	54041199	+	38.4384	2798	Intergenic	Intergenic	5304	LOC115710231	LOC115710231	XM_030638579	#N/A	protein_coding	-1.188510536	0.562939353	1	-2.347757595	3.01772E-05	0.000535144
2.5256755165372177e-05	NC_044370.1	35080601	35083399	+	38.4291	2798	Intergenic	Intergenic	-44606	LOC115710391	LOC115710391	XM_030638759	receptor-like protein kinase 7	protein_coding	-0.98614548	1	1	0.612307614	1	1
2.624269799131325e-05	NC_044373.1	39932601	39936399	+	38.4198	3798	Intergenic	Intergenic	20843	LOC115711985	LOC115711985	XM_030640189	V-type proton ATPase catalytic subunit A	protein_coding	-0.263190227	1	1	-0.203245873	1	1
0.00022386153127241737-2	NC_044378.1	70455201	70457799	+	38.4135	2598	Intergenic	Intergenic	45617	LOC115696814	LOC115696814	XM_030623697	uncharacterized LOC115696814	protein_coding	0.875620617	1	1	-2.303806534	0.003607723	0.034315323
0.00022386153127241737	NC_044373.1	73387601	73390399	+	38.4135	2798	exon	-exon (LOC115712335, exon 9 of 10)	3333	LOC115712335	LOC115712335	XM_030640608	probable 1-deoxy-D-xylulose-5-phosphate synthase 2, chloroplastic	protein_coding	-4.24242252	0.001050292	0.008551362	-1.245453613	0.815810187	1
2.726733043285234e-05	NC_044374.1	28969201	28972799	+	38.4104	3598	TTS	-TTS (LOC115717685)	1646	LOC115717685	LOC115717685	XM_030646667	uncharacterized LOC115717685	protein_coding	NA	NA	NA	NA	NA	NA
3.405289006346623e-06	NC_044379.1	34177001	34180399	+	38.4085	3398	promoter-TSS	-promoter-TSS (LOC115701782)	-499	LOC115701782	LOC115701782	XR_004008762	small nucleolar RNA R71	snoRNA	NA	NA	NA	NA	NA	NA
0.00023274211522498968	NC_044375.1	49649001	49652199	+	38.4009	3198	Intergenic	Intergenic	21628	LOC115721451	LOC115721451	XR_004012474	small nucleolar RNA R71	snoRNA	NA	NA	NA	NA	NA	NA
3.5369446803146654e-06	NC_044375.1	7255601	7259599	+	38.4009	3998	TTS	-TTS (LOC115721496)	118	LOC115721496	LOC115721496	XR_004012515	small nucleolar RNA R71	snoRNA	NA	NA	NA	NA	NA	NA
0.0019955688539583173-3	NC_044377.1	64019001	64019799	+	38.4009	798	Intergenic	Intergenic	11659	LOC115696086	LOC115696086	XR_004007684	small nucleolar RNA R71	snoRNA	NA	NA	NA	NA	NA	NA
2.8332180181912565e-05	NC_044373.1	45801	48599	+	38.4009	2798	Intergenic	Intergenic	10580	LOC115714018	LOC115714018	XM_030642527	7-dehydrocholesterol reductase-like	protein_coding	-0.424584863	1	1	0.069184796	1	1
0.0019955688539583173-2	NC_044374.1	15834801	15836599	+	38.4009	1798	Intergenic	Intergenic	-26439	LOC115717004	LOC115717004	XM_030645928	uncharacterized LOC115717004	protein_coding	3.084021004	6.87888E-16	3.06094E-14	1.564275674	0.025479549	0.175679117
0.00023274211522498968-2	NC_044377.1	12257401	12259599	+	38.4009	2198	promoter-TSS	-promoter-TSS (LOC115694983)	46	LOC115694983	LOC115694983	XM_030622086	uncharacterized LOC115694983	protein_coding	NA	NA	NA	NA	NA	NA
0.0019955688539583173	NC_044373.1	17710401	17711799	+	38.4009	1398	Intergenic	Intergenic	-389789	LOC115713207	LOC115713207	XM_030641691	uncharacterized LOC115713207	protein_coding	NA	NA	NA	NA	NA	NA
0.0002419781243117541	NC_044370.1	26907401	26909799	+	38.3881	2398	intron	-intron (LOC115708359, intron 3 of 3)	16550	LOC115708187	LOC115708187	XM_030636404	uncharacterized LOC115708187,	protein_coding	-2.908151003	0.629025159	NA	0	1	NA
0.00025158394080613714	NC_044372.1	16359801	16362199	+	38.3752	2398	exon	-exon (LOC115710475, exon 1 of 2)	269	LOC115710475	LOC115710475	XM_030638835	uncharacterized LOC115710475	protein_coding	NA	NA	NA	NA	NA	NA
0.0021619184454289768-4	NW_022060476.1	918001	919799	+	38.3621	1798	Intergenic	Intergenic	187100	LOC115702188	LOC115702188	XM_030629636	#N/A	protein_coding	NA	NA	NA	NA	NA	NA
0.0021619184454289768-3	NC_044376.1	39969801	39971799	+	38.3621	1998	Intergenic	Intergenic	-71775	LOC115723300	LOC115723300	XM_030652740	uncharacterized LOC115723300	protein_coding	0.611449907	1	1	0.41973092	1	1
0.0021619184454289768	NC_044371.1	34810401	34812199	+	38.3621	1798	Intergenic	Intergenic	-7633	LOC115703999	LOC115703999	XM_030631223	protein FAR1-RELATED SEQUENCE 2-like	protein_coding	NA	NA	NA	NA	NA	NA
0.00026157453705938783	NC_044375.1	14037601	14040199	+	38.3621	2598	Intergenic	Intergenic	-12251	LOC115719874	LOC115719874	XM_030649055	uncharacterized LOC115719874	protein_coding	1.549152999	0.892942939	NA	-0.437226105	1	NA
0.0021619184454289768-2	NC_044375.1	36445201	36446799	+	38.3621	1598	Intergenic	Intergenic	-2628	LOC115719229	LOC115719229	XM_030648183	uncharacterized LOC115719229	protein_coding	0.041909165	1	1	0.115865682	1	1
0.00027196550014000427-2	NC_044372.1	81040201	81043399	+	38.3489	3198	Intergenic	Intergenic	-10527	LOC115711006	LOC115711006	XM_030639351	uncharacterized LOC115711006	protein_coding	NA	NA	NA	NA	NA	NA
0.00027196550014000427	NC_044371.1	2222801	2224799	+	38.3489	1998	Intergenic	Intergenic	-7418	LOC115706576	LOC115706576	XM_030634271	U-box domain-containing protein 35,	protein_coding	-0.630871887	1	1	-0.426573552	1	1
4.613261024810641e-06	NC_044377.1	74671001	74674999	+	38.3462	3998	Intergenic	Intergenic	-9157	LOC115694742	LOC115694742	XM_030621836	protein CASPARIAN STRIP INTEGRITY FACTOR 2-like	protein_coding	-7.225815162	0.000416452	0.003740867	-4.216700522	0.073632622	0.416796201
3.565936630724397e-05	NC_044374.1	36360601	36364599	+	38.3422	3998	exon	-exon (LOC115717721, exon 6 of 7)	2292	LOC115717721	LOC115717721	XM_030646700	uncharacterized LOC115717721	protein_coding	NA	NA	NA	NA	NA	NA
0.0002827730575255626	NC_044375.1	38957601	38959799	+	38.3355	2198	Intergenic	Intergenic	-21299	LOC115720912	LOC115720912	XM_030650119	auxin-responsive protein SAUR50	protein_coding	1.549169232	0.892939793	NA	1.512629836	0.90002605	NA
4.977293840548363e-06	NC_044373.1	42117401	42120799	+	38.3301	3398	Intergenic	Intergenic	-5708	LOC115713431	LOC115713431	XM_030641911	uncharacterized mitochondrial protein AtMg00810-like	protein_coding	NA	NA	NA	NA	NA	NA
6.796535639870474e-07	NC_044370.1	41017401	41021799	+	38.3288	4398	intron	-intron (LOC115720386, intron 1 of 6)	2344	LOC115720386	LOC115720386	XM_030649539	uncharacterized LOC115720386	protein_coding	NA	NA	NA	NA	NA	NA
0.0023423955302854724-3	NC_044373.1	60927801	60929199	+	38.322	1398	Intergenic	Intergenic	-16383	LOC115714319	LOC115714319	XM_030642973	lupeol synthase	protein_coding	-0.102620746	1	1	0.676433813	1	1
0.00029401410389320854	NC_044371.1	21295001	21297999	+	38.322	2998	Intergenic	Intergenic	-25447	LOC115703887	LOC115703887	XM_030631124	uncharacterized LOC115703887	protein_coding	NA	NA	NA	NA	NA	NA
0.0023423955302854724	NC_044371.1	29240801	29242399	+	38.322	1598	Intergenic	Intergenic	38429	LOC115706025	LOC115706025	XM_030633523	uncharacterized LOC115706025	protein_coding	0.721123621	1	1	-2.393984341	0.003940023	0.03719045
0.0023423955302854724-2	NC_044371.1	65095001	65096999	+	38.322	1998	intron	-intron (LOC115705819, intron 2 of 9)	14546	LOC115705819	LOC115705819	XM_030633262	cytosolic endo-beta-N-acetylglucosaminidase 1,	protein_coding	0.788540236	1	1	1.305620334	0.54951819	1
1.4103275897295843e-08	NC_044370.1	48750601	48757799	+	38.3169	7198	Intergenic	Intergenic	-9942	LOC115711560	LOC115711560	XM_030639917	plasmodesmata-located protein 7	protein_coding	4.135659099	6.70365E-24	5.62726E-22	1.566159669	0.05469428	0.328576241
0.00030570622905717036	NC_044376.1	45515201	45517799	+	38.3083	2598	Intergenic	Intergenic	11307	LOC115722987	LOC115722987	XM_030652381	heavy metal-associated isoprenylated plant protein 21	protein_coding	-2.567998356	0.692220937	NA	0	1	NA
8.522944924039241e-07	NC_044373.1	28387201	28391199	+	38.2876	3998	Intergenic	Intergenic	47591	LOC115714559	LOC115714559	XM_030643294	ras-related protein RABA4c	protein_coding	-1.078264855	0.741394842	1	-0.826719066	1	1
6.251770426052831e-06	NC_044379.1	7523801	7525999	+	38.2806	2198	Intergenic	Intergenic	-35986	LOC115698921	LOC115698921	XR_004008254	uncharacterized LOC115698921	lncRNA	NA	NA	NA	NA	NA	NA
4.489421333613349e-05	NC_044376.1	35630601	35633599	+	38.2806	2998	Intergenic	Intergenic	8637	LOC115721905	LOC115721905	XM_030651009	uncharacterized protein YwkD	protein_coding	1.171752723	0.53873479	1	-0.021800132	1	1
0.0003305177267782364	NC_044371.1	65794401	65796799	+	38.2806	2398	Intergenic	Intergenic	-12332	LOC115704248	LOC115704248	XM_030631464	protein MID1-COMPLEMENTING ACTIVITY 1-like	protein_coding	-1.558127788	0.361433076	1	-0.871183481	1	1
4.0478094007177784e-10	NC_044375.1	51639601	51644199	+	38.2763	4598	exon	-exon (LOC115720179, exon 1 of 2)	304	LOC115720179	LOC115720179	XM_030649337	uncharacterized LOC115720179	protein_coding	NA	NA	NA	NA	NA	NA
4.66522094765181e-05	NC_044377.1	16860001	16862799	+	38.27	2798	Intergenic	Intergenic	-53361	LOC115696122	LOC115696122	XR_004007717	small nucleolar RNA R71	snoRNA	NA	NA	NA	NA	NA	NA
4.8479450298022504e-05	NC_044377.1	45023801	45027399	+	38.2593	3598	Intergenic	Intergenic	43186	LOC115725348	LOC115725348	XM_030654836	AUGMIN subunit 4	protein_coding	-0.710523758	1	1	-0.304695615	1	1
0.00035736331079248265	NC_044377.1	14257601	14260199	+	38.2521	2598	Intergenic	Intergenic	-30922	LOC115694997	LOC115694997	XM_030622095	uncharacterized mitochondrial protein AtMg00310-like	protein_coding	NA	NA	NA	NA	NA	NA
1.0689299262994e-06	NC_044373.1	7147201	7149599	+	38.2449	2398	Intergenic	Intergenic	-7907	LOC115712284	LOC115712284	XM_030640546	stemmadenine O-acetyltransferase	protein_coding	-1.572468938	0.77972187	NA	-1.395481496	0.84799097	NA
1.0689299262994e-06-2	NC_044373.1	7143801	7146399	+	38.2449	2598	Intergenic	Intergenic	-4607	LOC115712284	LOC115712284	XM_030640546	stemmadenine O-acetyltransferase	protein_coding	-1.572468938	0.77972187	NA	-1.395481496	0.84799097	NA
5.235276246222236e-05	NC_044371.1	27701401	27703999	+	38.2377	2598	Intergenic	Intergenic	21606	LOC115703960	LOC115703960	XM_030631185	uncharacterized LOC115703960	protein_coding	NA	NA	NA	NA	NA	NA
0.0003716011180179266	NC_044377.1	54380401	54382399	+	38.2377	1998	Intergenic	Intergenic	7691	LOC115725265	LOC115725265	XM_030654721	glycosyltransferase BC10,	protein_coding	0.248801496	1	1	0.507842453	1	1
7.854096713787659e-06	NC_044370.1	92026001	92030599	+	38.2289	4598	Intergenic	Intergenic	8252	LOC115695318	LOC115695318	XM_030622393	uncharacterized LOC115695318	protein_coding	NA	NA	NA	NA	NA	NA
5.440466118389149e-05	NC_044372.1	75769801	75771599	+	38.2267	1798	Intergenic	Intergenic	-24009	LOC115710943	LOC115710943	XM_030639291	uncharacterized LOC115710943	protein_coding	NA	NA	NA	NA	NA	NA
5.653746841007701e-05	NC_044379.1	63031801	63034399	+	38.2157	2598	promoter-TSS	-promoter-TSS (LOC115701792)	-607	LOC115701792	LOC115701792	XR_004008772	small nucleolar RNA R71	snoRNA	NA	NA	NA	NA	NA	NA
8.475131586435923e-06	NC_044375.1	51875801	51879799	+	38.2112	3998	Intergenic	Intergenic	3252	LOC115721488	LOC115721488	XR_004012507	small nucleolar RNA R71	snoRNA	NA	NA	NA	NA	NA	NA
0.00040181889162280567	NC_044373.1	66500801	66502599	+	38.2082	1798	Intergenic	Intergenic	36483	LOC115712496	LOC115712496	XM_030640781	retrotransposon-like protein 1,	protein_coding	0.00681352	1	1	-0.284569307	1	1
0.0004178465157531327	NW_022060428.1	122601	124199	+	38.1933	1598	NA	NA	NA	NA			#N/A		NA	NA	NA	NA	NA	NA
1.4460657374341992e-06	NC_044376.1	56953801	56959199	+	38.1857	5398	promoter-TSS	-promoter-TSS (LOC115724231)	-1409	LOC115724231	LOC115724231	XR_004013033	small nucleolar RNA R71	snoRNA	NA	NA	NA	NA	NA	NA
9.500361643752981e-06	NC_044370.1	76116401	76119199	+	38.1842	2798	Intergenic	Intergenic	5623	LOC115703333	LOC115703333	XR_004009106	small nucleolar RNA R71	snoRNA	NA	NA	NA	NA	NA	NA
0.0004345200549804262	NC_044370.1	75531801	75534199	+	38.1781	2398	Intergenic	Intergenic	10298	LOC115702570	LOC115702570	XR_004008926	uncharacterized LOC115702570	lncRNA	-0.374376113	1	NA	0	1	NA
6.594401644934895e-05-2	NC_044373.1	43136401	43139999	+	38.1705	3598	Intergenic	Intergenic	-107793	LOC115713438	LOC115713438	XM_030641921	uncharacterized LOC115713438	protein_coding	-0.374376113	1	NA	0	1	NA
6.594401644934895e-05	NC_044371.1	88263201	88265399	+	38.1705	2198	intron	-intron (LOC115706813, intron 8 of 17)	11111	LOC115706811	LOC115706811	XM_030634551	trifunctional UDP-glucose 4,6-dehydratase/UDP-4-keto-6-deoxy-D-glucose 3,5-epimerase/UDP-4-keto-L-rhamnose-reductase RHM1	protein_coding	0.805433791	1	1	0.914509355	1	1
1.0252152191464097e-05	NC_044379.1	4792001	4795999	+	38.1658	3998	Intergenic	Intergenic	2134	LOC115699144	LOC115699144	XM_030626391	uncharacterized LOC115699144	protein_coding	NA	NA	NA	NA	NA	NA
0.0004518658787821899	NC_044372.1	56491401	56493399	+	38.1628	1998	Intergenic	Intergenic	-12549	LOC115709923	LOC115709923	XM_030638184	protein Dr1 homolog,	protein_coding	0.266578417	1	1	0.336998732	1	1
6.853222439000567e-05	NC_044375.1	15514201	15517599	+	38.1589	3398	Intergenic	Intergenic	5592	LOC115719912	LOC115719912	XM_030649086	senescence-specific cysteine protease SAG39-like	protein_coding	3.201232994	0.555554282	NA	2.235987902	0.737297769	NA
1.0650163715248267e-05	NC_044376.1	32897001	32901199	+	38.1566	4198	Intergenic	Intergenic	13066	LOC115722507	LOC115722507	XM_030651728	U-box domain-containing protein 44,	protein_coding	-0.15935008	1	1	0.296356178	1	1
7.122266126385326e-05	NC_044378.1	41628201	41630599	+	38.1472	2398	Intergenic	Intergenic	-2212	LOC115696240	LOC115696240	XM_030623145	peptidyl-prolyl cis-trans isomerase FKBP13, chloroplastic	protein_coding	2.239828923	9.2643E-09	1.78803E-07	1.394229038	0.066138576	0.382025797
0.00046991145108010924-2	NC_044374.1	23629801	23631599	+	38.1472	1798	Intergenic	Intergenic	48833	LOC115718319	LOC115718319	XR_004011898	small nucleolar RNA R71	snoRNA	NA	NA	NA	NA	NA	NA
0.00046991145108010924	NC_044372.1	8475001	8476799	+	38.1472	1798	Intergenic	Intergenic	21547	LOC115709372	LOC115709372	XM_030637459	1-deoxy-D-xylulose 5-phosphate reductoisomerase, chloroplastic	protein_coding	1.487306347	0.017675999	0.101489168	-0.135750178	1	1
0.00046991145108010924-3	NC_044378.1	63191401	63193799	+	38.1472	2398	Intergenic	Intergenic	-5133	LOC115697218	LOC115697218	XM_030624142	nuclear transcription factor Y subunit A-7,	protein_coding	-0.274896684	1	1	-0.085930732	1	1
7.401939589385796e-05	NC_044373.1	42868601	42871199	+	38.1355	2598	Intergenic	Intergenic	39292	LOC115713437	LOC115713437	XM_030641920	stress response protein NST1-like	protein_coding	0.587400514	1	NA	-0.333047658	1	NA
0.0004886853766416514	NC_044373.1	25761801	25763199	+	38.1315	1398	Intergenic	Intergenic	-31798	LOC115714589	LOC115714589	XM_030643334	protein FAR1-RELATED SEQUENCE 11,	protein_coding	0.376280869	1	1	0.443992473	1	1
7.692666056453297e-05-3	NC_044376.1	12656001	12658799	+	38.1236	2798	Intergenic	Intergenic	22398	LOC115724279	LOC115724279	XR_004013077	small nucleolar RNA R71	snoRNA	NA	NA	NA	NA	NA	NA
7.692666056453297e-05-2	NC_044374.1	58480001	58483199	+	38.1236	3198	Intergenic	Intergenic	-220738	LOC115717871	LOC115717871	XM_030646842	cingulin-like	protein_coding	NA	NA	NA	NA	NA	NA
7.692666056453297e-05	NC_044374.1	41631801	41634399	+	38.1236	2598	Intergenic	Intergenic	-39350	LOC115717396	LOC115717396	XM_030646362	uncharacterized LOC115717396,	protein_coding	0.116752637	1	1	-0.251656664	1	1
1.2885493017678568e-05	NC_044375.1	13868401	13871999	+	38.1092	3598	Intergenic	Intergenic	36842	LOC115719871	LOC115719871	XM_030649051	zinc finger MYM-type protein 1-like	protein_coding	NA	NA	NA	NA	NA	NA
0.0005496814650718027-2	NC_044378.1	21347001	21348999	+	38.0832	1998	Intergenic	Intergenic	-23700	LOC115696927	LOC115696927	XM_030623823	UDP-glycosyltransferase 43	protein_coding	-2.616987243	0.011101881	0.068052122	-0.811224334	1	1
0.0005496814650718027	NC_044372.1	28587601	28589799	+	38.0832	2198	Intergenic	Intergenic	6144	LOC115709995	LOC115709995	XM_030638283	aquaporin PIP2-2	protein_coding	0.250683621	1	1	0.016825722	1	1
8.975176626432231e-05-2	NC_044377.1	53887001	53889999	+	38.075	2998	Intergenic	Intergenic	-4534	LOC115694683	LOC115694683	XM_030621766	uncharacterized LOC115694683,	protein_coding	0.080477517	1	1	0.307782859	1	1
8.975176626432231e-05	NC_044372.1	45414401	45417799	+	38.075	3398	Intergenic	Intergenic	-109073	LOC115710724	LOC115710724	XM_030639078	uncharacterized LOC115710724	protein_coding	NA	NA	NA	NA	NA	NA
4.2207340362544487e-07	NC_044373.1	62084601	62089599	+	38.0715	4998	Intergenic	Intergenic	-70651	LOC115715378	LOC115715378	XR_004011253	small nucleolar RNA R71	snoRNA	1.549169232	0.892939793	NA	1.512629836	0.90002605	NA
9.328136722915033e-05	NC_044370.1	68529201	68531599	+	38.0626	2398	Intergenic	Intergenic	80513	LOC115706750	LOC115706750	XR_004009636	uncharacterized LOC115706750	lncRNA	NA	NA	NA	NA	NA	NA
1.5592355483243884e-05	NC_044372.1	48205001	48208599	+	38.0601	3598	Intergenic	Intergenic	-9237	LOC115711723	LOC115711723	XR_004010602	small nucleolar RNA R71	snoRNA	NA	NA	NA	NA	NA	NA
0.0005945676119850763	NC_044374.1	15167401	15169599	+	38.0501	2198	Intergenic	Intergenic	-44650	LOC115717315	LOC115717315	XR_004011732	uncharacterized LOC115717315	lncRNA	NA	NA	NA	NA	NA	NA
9.695071646789769e-05-2	NC_044378.1	9826601	9829599	+	38.0501	2998	Intergenic	Intergenic	-11458	LOC115697000	LOC115697000	XM_030623900	protein NRT1/ PTR FAMILY 5.5-like	protein_coding	0	1	NA	-1.894926023	0.82273136	NA
9.695071646789769e-05	NC_044375.1	28250201	28253799	+	38.0501	3598	Intergenic	Intergenic	23070	LOC115718645	LOC115718645	XM_030647467	basic leucine zipper and W2 domain-containing protein 2	protein_coding	-0.083146723	1	1	0.458995279	1	1
2.8568466200606417e-06	NC_044371.1	89373401	89377199	+	38.0416	3798	Intergenic	Intergenic	8676	LOC115708132	LOC115708132	XM_030636330	coatomer subunit zeta-1	protein_coding	-0.715000035	1	1	-0.134911245	1	1
0.00010076539266802863	NC_044372.1	35267001	35270599	+	38.0374	3598	Intergenic	Intergenic	17348	LOC115711695	LOC115711695	XM_030640076	UDP-glycosyltransferase 73C3	protein_coding	1.571385161	0.664992835	1	-5.387787295	2.69524E-07	7.24623E-06
0.0006431625060481521	NC_044370.1	67584401	67586199	+	38.016	1798	Intergenic	Intergenic	-10313	LOC115713617	LOC115713617	XM_030642107	LOB domain-containing protein 39	protein_coding	-5.972740092	7.95232E-10	1.78167E-08	-3.803193505	0.000642494	0.00804414
3.200579719920767e-06	NC_044377.1	24840201	24843199	+	38.016	2998	Intergenic	Intergenic	27552	LOC115695060	LOC115695060	XM_030622157	uncharacterized LOC115695060	protein_coding	NA	NA	NA	NA	NA	NA
0.00010885417465223907	NC_044378.1	48270601	48272799	+	38.0117	2198	Intergenic	Intergenic	136994	LOC115696946	LOC115696946	XR_004007835	uncharacterized LOC115696946, 1	lncRNA	0.436192891	1	1	0.625387096	1	1
1.9605364733997043e-05	NC_044378.1	53430601	53434199	+	37.9987	3598	Intergenic	Intergenic	-50861	LOC115697471	LOC115697471	XM_030624490	trihelix transcription factor ASIL2	protein_coding	-0.016745926	1	1	-0.18963512	1	1
0.00011759700975396797	NC_044370.1	31485601	31488799	+	37.9855	3198	Intergenic	Intergenic	17250	LOC115719804	LOC115719804	XM_030648995	uncharacterized LOC115719804	protein_coding	NA	NA	NA	NA	NA	NA
2.198592570225219e-05	NC_044378.1	36487801	36490799	+	37.9669	2998	intron	-intron (LOC115696535, intron 2 of 2)	26631	LOC115696535	LOC115696535	XM_030623432	uncharacterized LOC115696535	protein_coding	NA	NA	NA	NA	NA	NA
0.000723696451653188-2	NC_044378.1	43045601	43046799	+	37.9633	1198	Intergenic	Intergenic	-9747	LOC115696587	LOC115696587	XM_030623480	uncharacterized LOC115696587	protein_coding	-0.405734849	1	NA	-0.429262275	1	NA
0.000723696451653188	NC_044371.1	50415001	50416799	+	37.9633	1798	Intergenic	Intergenic	25100	LOC115706568	LOC115706568	XR_004009602	uncharacterized LOC115706568	lncRNA	-0.926102984	1	NA	-0.931259136	1	NA
2.284233527976442e-05	NC_044378.1	63648001	63650799	+	37.9562	2798	Intergenic	Intergenic	-2803	LOC115698421	LOC115698421	XR_004008168	small nucleolar RNA R71	snoRNA	NA	NA	NA	NA	NA	NA
0.0007527494683476469	NC_044373.1	63857201	63859999	+	37.9453	2798	Intergenic	Intergenic	-3742	LOC115714316	LOC115714316	XM_030642968	glycolipid transfer protein 1,	protein_coding	-0.695142757	1	1	-0.031081492	1	1
2.3732264755726402e-05-2	NC_044375.1	75391801	75394999	+	37.9453	3198	Intergenic	Intergenic	19140	LOC115721205	LOC115721205	XM_030650464	putative E3 ubiquitin-protein ligase XBAT31	protein_coding	-2.619299211	2.74788E-14	1.02768E-12	-1.790548503	0.000206438	0.002965888
0.00013205552744690154	NC_044373.1	39659801	39662199	+	37.9453	2398	intron	-intron (LOC115713411, intron 1 of 2)	351	LOC115713411	LOC115713411	XM_030641895	uncharacterized LOC115713411	protein_coding	0.117058248	1	NA	-0.951477275	1	NA
2.3732264755726402e-05	NC_044370.1	70486601	70489999	+	37.9453	3398	Intergenic	Intergenic	-4246	LOC115723794	LOC115723794	XM_030653266	uncharacterized LOC115723794	protein_coding	0	1	NA	-0.410947537	1	NA
0.00013205552744690154-2	NC_044374.1	3570801	3574199	+	37.9453	3398	Intergenic	Intergenic	-2710	LOC115718327	LOC115718327	XR_004011906	small nucleolar RNA R71	snoRNA	NA	NA	NA	NA	NA	NA
0.0001372626747642264	NC_044373.1	43652201	43654999	+	37.9317	2798	Intergenic	Intergenic	407607	LOC115713438	LOC115713438	XM_030641921	uncharacterized LOC115713438	protein_coding	-0.374376113	1	NA	0	1	NA
4.675516076300198e-06	NC_044378.1	27466801	27469799	+	37.9271	2998	Intergenic	Intergenic	73585	LOC115697257	LOC115697257	XR_004007924	uncharacterized LOC115697257	lncRNA	NA	NA	NA	NA	NA	NA
0.000782983030161404	NW_022060454.1	513801	515599	+	37.9271	1798	Intergenic	Intergenic	10542	LOC115702127	LOC115702127	XM_030629586	#N/A	protein_coding	1.214863418	0.74862229	1	1.078418672	0.906335909	1
6.126034726352629e-09	NC_044370.1	41028201	41035199	+	37.9234	6998	Intergenic	Intergenic	-2440	LOC115720395	LOC115720395	XM_030649545	uncharacterized LOC115720395	protein_coding	NA	NA	NA	NA	NA	NA
3.24968989889252e-08	NC_044376.1	50801601	50807399	+	37.9209	5798	Intergenic	Intergenic	1706	LOC115723205	LOC115723205	XR_004012915	uncharacterized LOC115723205	lncRNA	NA	NA	NA	NA	NA	NA
0.000814445854626656	NC_044371.1	54531801	54533799	+	37.9086	1998	Intergenic	Intergenic	-378673	LOC115704145	LOC115704145	XM_030631362	uncharacterized LOC115704145	protein_coding	NA	NA	NA	NA	NA	NA
0.000814445854626656-2	NC_044377.1	17809601	17811599	+	37.9086	1998	Intergenic	Intergenic	-2444	LOC115725700	LOC115725700	XM_030655292	2-alkenal reductase (NADP(+)-dependent)-like	protein_coding	0	1	1	-4.662054716	0.164458313	0.778218525
0.0001483057935558748	NC_044370.1	77941801	77944599	+	37.9039	2798	Intergenic	Intergenic	-21574	LOC115725024	LOC115725024	XM_030654427	uncharacterized LOC115725024	protein_coding	NA	NA	NA	NA	NA	NA
3.635413945410841e-08	NC_044377.1	44628601	44632599	+	37.9024	3998	promoter-TSS	-promoter-TSS (LOC115696160)	-909	LOC115696160	LOC115696160	XR_004007751	small nucleolar RNA R71	snoRNA	NA	NA	NA	NA	NA	NA
2.7654367265445893e-05-2	NC_044372.1	35212601	35215599	+	37.9011	2998	Intergenic	Intergenic	-19291	LOC115710176	LOC115710176	XM_030638517	UDP-glycosyltransferase 73C6	protein_coding	0.62394489	1	1	0.622499196	1	1
2.7654367265445893e-05	NC_044371.1	1085001	1087999	+	37.9011	2998	Intergenic	Intergenic	10460	LOC115706877	LOC115706877	XR_004009659	uncharacterized LOC115706877	lncRNA	NA	NA	NA	NA	NA	NA
1.939913693630729e-07	NW_022060485.1	12601	14599	+	37.8969	1998	Intergenic	Intergenic	-62883	LOC115702201	LOC115702201	XM_030629650	#N/A	protein_coding	NA	NA	NA	NA	NA	NA
1.939913693630729e-07-2	NW_022060485.1	15401	18199	+	37.8969	2798	Intergenic	Intergenic	-59683	LOC115702201	LOC115702201	XM_030629650	#N/A	protein_coding	NA	NA	NA	NA	NA	NA
0.0008471887103336558	NC_044373.1	39463201	39465199	+	37.8898	1998	Intergenic	Intergenic	-2652	LOC115713409	LOC115713409	XM_030641892	uncharacterized mitochondrial protein AtMg00810-like	protein_coding	NA	NA	NA	NA	NA	NA
0.0008471887103336558-2	NC_044377.1	72041201	72043199	+	37.8898	1998	Intergenic	Intergenic	-5852	LOC115724499	LOC115724499	XM_030653790	probable ribosome-binding factor A, chloroplastic,	protein_coding	1.463904672	0.004872342	0.033171639	1.036465478	0.823200339	1
2.87327653616129e-05	NC_044370.1	60603801	60607599	+	37.8898	3798	Intergenic	Intergenic	-73646	LOC115722809	LOC115722809	XM_030652141	uncharacterized LOC115722809	protein_coding	NA	NA	NA	NA	NA	NA
0.00016024431069957553	NC_044374.1	62732201	62734199	+	37.8756	1998	Intergenic	Intergenic	-20100	LOC115717309	LOC115717309	XM_030646279	MADS-box protein AGL42	protein_coding	0.073506358	1	1	1.964038867	3.64838E-11	1.76657E-09
0.0008812645055750892	NC_044374.1	85426801	85428599	+	37.8709	1798	Intergenic	Intergenic	-149596	LOC115716182	LOC115716182	XM_030644921	uncharacterized LOC115716182	protein_coding	-2.148277376	0.003082854	0.022120827	-2.012420156	0.009106107	0.074678623
0.000166572018454721	NC_044379.1	13642401	13644999	+	37.8613	2598	Intergenic	Intergenic	-14998	LOC115700456	LOC115700456	XM_030627994	uncharacterized LOC115700456	protein_coding	-0.845924763	1	1	-0.958496759	1	1
0.0009167283809561674-2	NC_044379.1	9033801	9036599	+	37.8516	2798	Intergenic	Intergenic	-121380	LOC115699809	LOC115699809	XM_030627352	uncharacterized LOC115699809	protein_coding	NA	NA	NA	NA	NA	NA
0.0009167283809561674	NC_044371.1	6956201	6957599	+	37.8516	1398	Intergenic	Intergenic	-6560	LOC115706707	LOC115706707	XM_030634420	expansin-A4	protein_coding	1.339892234	0.556586556	1	0.454040082	1	1
2.6195138492132386e-07	NC_044370.1	11751401	11753999	+	37.8395	2598	Intergenic	Intergenic	5134	LOC115722508	LOC115722508	XM_030651768	uncharacterized LOC115722508,	protein_coding	-1.733691233	0.00233362	0.01731577	-0.338182711	1	1
0.0009536378061560597-2	NC_044372.1	70451601	70453199	+	37.8321	1598	Intergenic	Intergenic	-9099	LOC115711477	LOC115711477	XM_030639817	PAN domain-containing protein At5g03700	protein_coding	-0.554489485	1	1	-0.26569044	1	1
0.0009536378061560597	NC_044370.1	98513001	98514599	+	37.8321	1598	intron	-intron (LOC115699331, intron 13 of 19)	8769	LOC115699331	LOC115699331	XM_030626683	probable LRR receptor-like serine/threonine-protein kinase At5g37450	protein_coding	-0.441872017	1	1	0.126983977	1	1
1.4096656384406434e-06	NC_044375.1	82540001	82542999	+	37.8237	2998	promoter-TSS	-promoter-TSS (LOC115721639)	-1457	LOC115721639	LOC115721639	XR_004012646	small nucleolar RNA R71	snoRNA	NA	NA	NA	NA	NA	NA
0.00018710681243475777	NC_044372.1	68985601	68987999	+	37.8173	2398	Intergenic	Intergenic	5388	LOC115710886	LOC115710886	XM_030639238	uncharacterized LOC115710886	protein_coding	NA	NA	NA	NA	NA	NA
0.000992052681035603	NC_044379.1	1925401	1927199	+	37.8124	1798	Intergenic	Intergenic	-863489	LOC115698919	LOC115698919	XM_030626122	extracellular ribonuclease LE	protein_coding	-2.667802986	0.007814691	0.050323215	-6.151631711	1.46512E-17	1.49016E-15
3.0441657304928067e-07	NC_044374.1	51753601	51756599	+	37.8099	2998	exon	-exon (LOC115715851, exon 1 of 1)	452	LOC115715851	LOC115715851	XM_030644519	uncharacterized LOC115715851	protein_coding	0	1	NA	-1.399014792	0.921130529	NA
3.756303358865743e-05	NC_044378.1	11803601	11807599	+	37.8084	3998	promoter-TSS	-promoter-TSS (LOC115698391)	-858	LOC115698391	LOC115698391	XR_004008140	small nucleolar RNA R71	snoRNA	NA	NA	NA	NA	NA	NA
0.00019450407136240684	NC_044375.1	24923601	24926399	+	37.8024	2798	Intergenic	Intergenic	-22516	LOC115719042	LOC115719042	XM_030647926	phosphoglycolate phosphatase 1B, chloroplastic	protein_coding	2.284817293	5.11176E-16	2.32301E-14	1.47428703	0.002701015	0.027000322
0.00019450407136240684-2	NC_044379.1	5528401	5530599	+	37.8024	2198	Intergenic	Intergenic	-243380	LOC115701194	LOC115701194	XM_030628916	39S ribosomal protein L28, mitochondrial	protein_coding	-0.02710153	1	1	0.292764956	1	1
0.001032035441295769-3	NC_044377.1	63497601	63498799	+	37.7923	1198	Intergenic	Intergenic	14352	LOC115695729	LOC115695729	XM_030622801	probable plastid-lipid-associated protein 4, chloroplastic,	protein_coding	-0.229350819	1	1	0.50569892	1	1
0.001032035441295769	NC_044370.1	20790001	20792399	+	37.7923	2398	Intergenic	Intergenic	-18499	LOC115705927	LOC115705927	XM_030633407	peptidyl-tRNA hydrolase 2, mitochondrial	protein_coding	0.526016729	1	1	0.658645354	1	1
0.001032035441295769-2	NC_044377.1	9268401	9269999	+	37.7923	1598	Intergenic	Intergenic	-35957	LOC115694950	LOC115694950	XM_030622053	uncharacterized LOC115694950	protein_coding	-2.13150697	0.470843737	1	2.995451546	0.302377922	1
0.0011169677074984836	NC_044373.1	77041801	77043399	+	37.7514	1598	Intergenic	Intergenic	-2247	LOC115714238	LOC115714238	XM_030642864	probable mitochondrial adenine nucleotide transporter BTL3	protein_coding	-2.692081246	1.46344E-06	2.03705E-05	-1.384677274	0.27734186	1
9.260668643121251e-06	NC_044379.1	10580401	10584999	+	37.7514	4598	Intergenic	Intergenic	-16155	LOC115701598	LOC115701598	XR_004008592	small nucleolar RNA R71	snoRNA	NA	NA	NA	NA	NA	NA
2.0563924509749767e-06	NC_044376.1	35908201	35911199	+	37.7366	2998	Intergenic	Intergenic	12456	LOC115723804	LOC115723804	XM_030653274	uncharacterized LOC115723804	protein_coding	NA	NA	NA	NA	NA	NA
0.0011620557830538082	NC_044370.1	59694801	59696599	+	37.7306	1798	Intergenic	Intergenic	15213	LOC115722700	LOC115722700	XM_030651982	uncharacterized LOC115722700	protein_coding	NA	NA	NA	NA	NA	NA
0.0011620557830538082-2	NC_044372.1	59845401	59846999	+	37.7306	1598	Intergenic	Intergenic	-64172	LOC115711352	LOC115711352	XM_030639689	protein SRC2	protein_coding	-0.780606026	1	1	-0.59773863	1	1
0.0011620557830538082-3	NC_044373.1	72086601	72088399	+	37.7306	1798	Intergenic	Intergenic	-20769	LOC115712026	LOC115712026	XM_030640230	uncharacterized LOC115712026	protein_coding	-0.374392103	1	NA	-1.369832499	0.926926691	NA
0.0011620557830538082-4	NC_044374.1	30230601	30232399	+	37.7306	1798	Intergenic	Intergenic	-3937	LOC115716734	LOC115716734	XM_030645616	uncharacterized LOC115716734	protein_coding	0.060075054	1	1	0.394223512	1	1
0.0011620557830538082-5	NC_044378.1	61843201	61845799	+	37.7306	2598	Intergenic	Intergenic	7865	LOC115697475	LOC115697475	XM_030624497	berberine bridge enzyme-like 15	protein_coding	-4.482718522	2.49117E-10	5.91208E-09	-2.823808866	0.000965986	0.011334687
4.912502050863145e-05	NC_044375.1	510801	513599	+	37.7221	2798	Intergenic	Intergenic	-9830	LOC115719090	LOC115719090	XM_030648001	uncharacterized LOC115719090	protein_coding	NA	NA	NA	NA	NA	NA
0.0012089891299794818	NC_044374.1	36749001	36750799	+	37.7094	1798	Intergenic	Intergenic	12843	LOC115717723	LOC115717723	XM_030646703	uncharacterized LOC115717723	protein_coding	NA	NA	NA	NA	NA	NA
2.489369279174146e-10	NC_044378.1	28068401	28072999	+	37.7094	4598	Intergenic	Intergenic	-10129	LOC115697166	LOC115697166	XM_030624078	uncharacterized LOC115697166,	protein_coding	0.706907718	1	1	-0.777497606	1	1
0.00024551091025983165	NC_044377.1	63165801	63169399	+	37.7094	3598	Intergenic	Intergenic	-8185	LOC115696015	LOC115696015	XR_004007617	small nucleolar RNA R71	snoRNA	NA	NA	NA	NA	NA	NA
1.1200057906170047e-05	NC_044374.1	60990601	60994999	+	37.6987	4398	Intergenic	Intergenic	-31604	LOC115716329	LOC115716329	XM_030645097	ATG8-interacting protein 2	protein_coding	0.111291993	1	1	0.232773305	1	1
5.3043344685513835e-05	NC_044377.1	35631601	35635199	+	37.6966	3598	Intergenic	Intergenic	25320	LOC115724603	LOC115724603	XM_030653919	uncharacterized LOC115724603	protein_coding	-1.741274094	0.09881276	0.438071422	-1.861663156	0.054697184	0.328576241
1.163437319481266e-05	NC_044370.1	61443601	61446599	+	37.6879	2998	Intergenic	Intergenic	-104655	LOC115702513	LOC115702513	XR_004008905	uncharacterized LOC115702513	lncRNA	NA	NA	NA	NA	NA	NA
1.4111325056562054e-09	NC_044372.1	62679001	62688399	+	37.6771	9398	Intergenic	Intergenic	24386	LOC115710839	LOC115710839	XM_030639193	uncharacterized LOC115710839	protein_coding	NA	NA	NA	NA	NA	NA
2.6791644934721086e-06	NC_044376.1	12532201	12536799	+	37.6724	4598	promoter-TSS	-promoter-TSS (LOC115724375)	-884	LOC115724375	LOC115724375	XR_004013168	small nucleolar RNA R71	snoRNA	NA	NA	NA	NA	NA	NA
0.0013087024149775744-2	NW_022060465.1	831601	833199	+	37.6662	1598	Intergenic	Intergenic	10706	LOC115702157	LOC115702157	XM_030629613	#N/A	protein_coding	-0.374812897	1	1	0.683714857	1	1
0.0013087024149775744	NC_044375.1	68059401	68061199	+	37.6662	1798	Intergenic	Intergenic	4212	LOC115721193	LOC115721193	XR_004012400	uncharacterized LOC115721193	lncRNA	NA	NA	NA	NA	NA	NA
1.255439245623445e-05	NC_044379.1	22502401	22505999	+	37.6662	3598	Intergenic	Intergenic	-5753	LOC115699930	LOC115699930	XM_030627478	adenosine deaminase-like protein	protein_coding	3.279903801	9.50509E-05	0.000966997	-0.150616498	1	1
5.9518133494292336e-05	NC_044378.1	63454801	63456799	+	37.6574	1998	Intergenic	Intergenic	-13010	LOC115697230	LOC115697230	XR_004007918	uncharacterized LOC115697230	lncRNA	NA	NA	NA	NA	NA	NA
2.8896270929494315e-06	NC_044373.1	37216801	37222799	+	37.6536	5998	Intergenic	Intergenic	-4622	LOC115715514	LOC115715514	XR_004011382	small nucleolar RNA R71	snoRNA	NA	NA	NA	NA	NA	NA
0.0013616460811841024	NC_044374.1	70269601	70271599	+	37.6441	1998	Intergenic	Intergenic	-3546	LOC115718265	LOC115718265	XR_004011848	small nucleolar RNA R71	snoRNA	NA	NA	NA	NA	NA	NA
0.00029819640590374733	NC_044375.1	89364801	89366599	+	37.6273	1798	Intergenic	Intergenic	3604	LOC115721254	LOC115721254	XM_030650513	uncharacterized LOC115721254	protein_coding	-4.827749449	9.60095E-14	3.36173E-12	-2.519946026	0.003317078	0.031999353
3.2368222666615062e-06	NC_044377.1	33804001	33806199	+	37.6249	2198	Intergenic	Intergenic	23203	LOC115695109	LOC115695109	XM_030622199	uncharacterized LOC115695109	protein_coding	NA	NA	NA	NA	NA	NA
0.0014167627699872031-2	NC_044373.1	32929801	32931799	+	37.6217	1998	Intergenic	Intergenic	88090	LOC115712380	LOC115712380	XM_030640652	uncharacterized LOC115712380	protein_coding	-0.008229876	1	1	-0.118441572	1	1
0.0014167627699872031	NC_044373.1	5973401	5975599	+	37.6217	2198	Intergenic	Intergenic	2093	LOC115715348	LOC115715348	XR_004011224	small nucleolar RNA R71	snoRNA	NA	NA	NA	NA	NA	NA
0.00031003117506256525	NC_044370.1	102732801	102734999	+	37.6103	2198	Intergenic	Intergenic	-8056	LOC115701091	LOC115701091	XM_030628789	jasmonate O-methyltransferase	protein_coding	1.582005472	0.074602724	0.347152786	2.512550603	4.64894E-06	9.79898E-05
0.0014741433606067448-3	NC_044373.1	25189401	25191799	+	37.5989	2398	intron	-intron (LOC115712607, intron 3 of 4)	18200	LOC115712607	LOC115712607	XM_030640911	isoeugenol synthase 1	protein_coding	-0.702294836	1	1	-2.652690341	0.008020597	0.067151536
0.0014741433606067448-2	NC_044373.1	21992401	21993799	+	37.5989	1398	Intergenic	Intergenic	-41380	LOC115712561	LOC115712561	XM_030640860	ribosomal RNA processing protein 1 homolog A	protein_coding	-0.024604549	1	1	0.442304545	1	1
1.577659012857992e-05	NC_044377.1	43490801	43493999	+	37.5989	3198	Intergenic	Intergenic	-432181	LOC115695201	LOC115695201	XM_030622286	uncharacterized LOC115695201	protein_coding	NA	NA	NA	NA	NA	NA
0.0014741433606067448	NC_044372.1	42311401	42312399	+	37.5989	998	TTS	-TTS (LOC115711371)	607	LOC115711371	LOC115711371	XM_030639706	uncharacterized LOC115711371	protein_coding	NA	NA	NA	NA	NA	NA
0.00032233985674234866	NC_044371.1	1114801	1116799	+	37.5932	1998	TTS	-TTS (LOC115706647)	6486	LOC115706647	LOC115706647	XM_030634363	ATP-dependent DNA helicase SRS2-like protein At4g25120	protein_coding	-0.951581074	1	1	-0.351981515	1	1
0.00032233985674234866-3	NW_022060359.1	190001	191999	+	37.5932	1998	NA	NA	NA	NA			#N/A		NA	NA	NA	NA	NA	NA
0.00032233985674234866-2	NC_044375.1	43812601	43814799	+	37.5932	2198	Intergenic	Intergenic	18705	LOC115721317	LOC115721317	XM_030650591	tropomyosin-2-like	protein_coding	-1.940454338	0.414144069	1	-0.234417585	1	1
7.212486361368888e-05	NC_044371.1	99444601	99448999	+	37.5898	4398	TTS	-TTS (LOC115704630)	727	LOC115704630	LOC115704630	XM_030631832	uncharacterized LOC115704630	protein_coding	NA	NA	NA	NA	NA	NA
0.00033514164001248253-2	NC_044375.1	18376601	18379199	+	37.5759	2598	Intergenic	Intergenic	18420	LOC115720628	LOC115720628	XM_030649792	uncharacterized LOC115720628,	protein_coding	0.001112217	1	1	-0.335502297	1	1
0.00033514164001248253	NC_044374.1	17137201	17139599	+	37.5759	2398	Intergenic	Intergenic	60797	LOC115718300	LOC115718300	XR_004011880	small nucleolar RNA R71	snoRNA	NA	NA	NA	NA	NA	NA
0.00033514164001248253-3	NC_044375.1	28101001	28102599	+	37.5759	1598	Intergenic	Intergenic	-16919	LOC115719998	LOC115719998	XM_030649167	uncharacterized LOC115719998	protein_coding	-0.374376113	1	NA	0	1	NA
0.0015338826280758694	NC_044375.1	40128801	40130599	+	37.5759	1798	Intergenic	Intergenic	24211	LOC115720082	LOC115720082	XM_030649244	uncharacterized LOC115720082	protein_coding	NA	NA	NA	NA	NA	NA
0.0015338826280758694-2	NC_044375.1	50730801	50732599	+	37.5759	1798	Intergenic	Intergenic	6408	LOC115720168	LOC115720168	XM_030649326	uncharacterized LOC115720168	protein_coding	NA	NA	NA	NA	NA	NA
1.7025734104483393e-05	NC_044373.1	76175801	76178799	+	37.5759	2998	Intergenic	Intergenic	-3860	LOC115711999	LOC115711999	XM_030640198	zinc finger BED domain-containing protein RICESLEEPER 4-like	protein_coding	0	1	NA	-0.410947537	1	NA
5.239741848427859e-13	NC_044371.1	43550401	43559399	+	37.572	8998	Intergenic	Intergenic	3462	LOC115708324	LOC115708324	XM_030636565	ATP synthase subunit alpha, chloroplastic	protein_coding	1.530746015	0.163438258	0.656999922	0.715525804	1	1
9.407446034622285e-07	NC_044373.1	73138001	73141799	+	37.5671	3798	Intergenic	Intergenic	-20809	LOC115713668	LOC115713668	XM_030642152	zinc finger MYM-type protein 1-like	protein_coding	1.549169232	0.892939793	NA	1.512629836	0.90002605	NA
1.7687077097565503e-05	NC_044374.1	5206601	5210999	+	37.5642	4398	promoter-TSS	-promoter-TSS (LOC115717501)	14	LOC115717501	LOC115717501	XM_030646487	uncharacterized LOC115717501	protein_coding	NA	NA	NA	NA	NA	NA
0.0003484565018325458	NC_044374.1	34952001	34955599	+	37.5584	3598	Intergenic	Intergenic	-243264	LOC115717435	LOC115717435	XM_030646422	uncharacterized LOC115717435	protein_coding	0.162737964	1	1	0.183229092	1	1
1.837421929481591e-05	NC_044378.1	20016801	20018599	+	37.5525	1798	Intergenic	Intergenic	6190	LOC115697822	LOC115697822	XM_030624959	signaling peptide TAXIMIN 1	protein_coding	-1.563210694	0.298150276	1	-3.410917437	6.39226E-06	0.000131561
4.381320840363168e-06	NW_022060465.1	958401	963199	+	37.5457	4798	Intergenic	Intergenic	75125	LOC115702159	LOC115702159	XM_030629616	#N/A	protein_coding	-0.359030227	1	1	0.308534721	1	1
0.0003623052399814185-2	NW_022060474.1	67001	70199	+	37.5406	3198	Intergenic	Intergenic	20211	LOC115702184	LOC115702184	XM_030629635	#N/A	protein_coding	NA	NA	NA	NA	NA	NA
0.0003623052399814185	NC_044375.1	44830801	44833799	+	37.5406	2998	Intergenic	Intergenic	112956	LOC115720121	LOC115720121	XM_030649282	phospholipid:diacylglycerol acyltransferase 1-like	protein_coding	0.146806972	1	1	-0.223893842	1	1
1.908817219250445e-05	NC_044372.1	90838401	90841199	+	37.5406	2798	Intergenic	Intergenic	-7141	LOC115709111	LOC115709111	XM_030637145	peroxidase 3-like	protein_coding	0	1	NA	-3.59510467	0.411594994	NA
0.0016608368162692269-2	NC_044377.1	61358201	61360599	+	37.5287	2398	Intergenic	Intergenic	-6009	LOC115725564	LOC115725564	XM_030655130	receptor-like protein kinase 7	protein_coding	0.325098354	1	1	0.893996068	1	1
1.982998717997556e-05	NC_044373.1	45772401	45774199	+	37.5287	1798	Intergenic	Intergenic	-65122	TRNAL-AAG_4	TRNAL-AAG_4	TRNAL-AAG_4	#N/A	tRNA	NA	NA	NA	NA	NA	NA
0.0016608368162692269	NC_044373.1	80298401	80300399	+	37.5287	1998	Intergenic	Intergenic	-31469	LOC115713741	LOC115713741	XM_030642221	basic leucine zipper 43-like	protein_coding	-0.444884488	1	1	2.543817726	0.15892291	0.75745635
0.0003767095073943617	NC_044374.1	52941401	52944199	+	37.5227	2798	Intergenic	Intergenic	4823	LOC115717843	LOC115717843	XM_030646814	uncharacterized LOC115717843	protein_coding	NA	NA	NA	NA	NA	NA
0.0003767095073943617-2	NC_044375.1	66034001	66036599	+	37.5227	2598	Intergenic	Intergenic	19777	LOC115720985	LOC115720985	XM_030650210	uncharacterized LOC115720985	protein_coding	-0.29074805	1	1	-0.68256737	1	1
2.7468026710963834e-07	NC_044376.1	34520801	34527799	+	37.5207	6998	Intergenic	Intergenic	-52669	LOC115722520	LOC115722520	XM_030651749	VAN3-binding protein	protein_coding	0.010178239	1	1	0.209854163	1	1
8.742056186862183e-05	NC_044373.1	45589601	45591999	+	37.5191	2398	Intergenic	Intergenic	44971	LOC115713462	LOC115713462	XM_030641945	uncharacterized LOC115713462	protein_coding	NA	NA	NA	NA	NA	NA
2.0600757124185157e-05	NC_044374.1	77510201	77513999	+	37.5167	3798	Intergenic	Intergenic	37942	LOC115718006	LOC115718006	XM_030646974	uncharacterized LOC115718006	protein_coding	0	1	NA	-0.410947537	1	NA
4.908440090852069e-06	NC_044377.1	5432401	5436399	+	37.515	3998	Intergenic	Intergenic	-8967	LOC115725101	LOC115725101	XM_030654527	very-long-chain aldehyde decarbonylase CER3	protein_coding	0.80827037	1	1	-0.851567617	1	1
0.001728262359737228-2	NC_044374.1	66327601	66328999	+	37.5046	1398	Intergenic	Intergenic	21911	LOC115717915	LOC115717915	XM_030646882	uncharacterized LOC115717915	protein_coding	NA	NA	NA	NA	NA	NA
0.001728262359737228	NC_044372.1	38219601	38221799	+	37.5046	2198	Intergenic	Intergenic	-17070	LOC115709827	LOC115709827	XM_030638061	FAD synthase,	protein_coding	0.873790874	1	1	0.754294613	1	1
2.2233750692809417e-05-2	NW_022060454.1	1053601	1057999	+	37.4924	4398	Intergenic	Intergenic	-446392	LOC115702125	LOC115702125	XM_030629583	#N/A	protein_coding	0.642329408	1	1	-2.642988593	0.003486277	0.033308503
2.2233750692809417e-05	NC_044373.1	78541001	78544199	+	37.4924	3198	Intergenic	Intergenic	-19080	LOC115714331	LOC115714331	XM_030642994	beclin-1-like protein A,	protein_coding	-0.946106018	1	1	0.538414931	1	1
9.4417374827515e-05	NC_044374.1	61524001	61527199	+	37.49	3198	Intergenic	Intergenic	-24498	LOC115716436	LOC115716436	XM_030645229	nuclear pore complex protein Nup50,	protein_coding	0.475061273	1	1	0.683349823	1	1
5.4991982304573965e-06	NC_044375.1	44685201	44687999	+	37.4837	2798	Intergenic	Intergenic	-23487	LOC115720120	LOC115720120	XM_030649281	uncharacterized LOC115720120	protein_coding	-0.469670029	1	1	-0.689331956	1	1
0.001798468212243324	NC_044370.1	5275001	5276799	+	37.4801	1798	promoter-TSS	-promoter-TSS (LOC115702395)	-1902	LOC115702395	LOC115702395	XM_030629864	uncharacterized LOC115702395	protein_coding	2.842184763	2.62739E-05	0.000297972	1.689014738	0.107978684	0.562360946
2.3098382604186738e-05	NC_044379.1	40832201	40835999	+	37.4801	3798	Intergenic	Intergenic	-3204	LOC115699380	LOC115699380	XM_030626753	BTB/POZ domain-containing protein FBL11,	protein_coding	0.305931493	1	1	0.124424148	1	1
2.3996789683278768e-05	NC_044374.1	29430201	29434399	+	37.4678	4198	Intergenic	Intergenic	-8334	LOC115716311	LOC115716311	XM_030645070	glycosyltransferase family 64 protein C4,	protein_coding	-0.85268933	1	1	-0.342347367	1	1
0.00010197788766515749	NC_044374.1	43886601	43890199	+	37.4603	3598	Intergenic	Intergenic	-178291	LOC115716271	LOC115716271	XM_030645032	beta-adaptin-like protein B	protein_coding	-0.127677437	1	1	0.358124412	1	1
0.0018715713824478462-2	NC_044372.1	61954401	61956799	+	37.4553	2398	Intergenic	Intergenic	1905	LOC115711785	LOC115711785	XR_004010660	small nucleolar RNA R71	snoRNA	NA	NA	NA	NA	NA	NA
0.0018715713824478462	NC_044370.1	67264601	67265999	+	37.4553	1398	Intergenic	Intergenic	-175673	LOC115713556	LOC115713556	XM_030642046	protein NPGR1,	protein_coding	-1.940964884	0.001145461	0.009263437	-1.10651835	0.717859013	1
0.0018715713824478462-5	NW_022060514.1	39001	40399	+	37.4553	1398	NA	NA	NA	NA			#N/A		NA	NA	NA	NA	NA	NA
0.0018715713824478462-4	NW_022060454.1	340001	341399	+	37.4553	1398	Intergenic	Intergenic	-163458	LOC115702127	LOC115702127	XM_030629586	#N/A	protein_coding	1.214863418	0.74862229	1	1.078418672	0.906335909	1
0.0018715713824478462-3	NC_044378.1	32413201	32414399	+	37.4553	1198	Intergenic	Intergenic	-14734	LOC115696965	LOC115696965	XR_004007845	uncharacterized LOC115696965	lncRNA	NA	NA	NA	NA	NA	NA
0.00044034690757641554-2	NC_044377.1	31428401	31430599	+	37.449	2198	Intergenic	Intergenic	-17002	LOC115725300	LOC115725300	XM_030654765	kinesin-like protein KIN-14N	protein_coding	0.732420576	1	1	-0.007496781	1	1
0.00044034690757641554	NC_044377.1	26534201	26536999	+	37.449	2798	Intergenic	Intergenic	21376	LOC115696101	LOC115696101	XR_004007699	small nucleolar RNA R71	snoRNA	NA	NA	NA	NA	NA	NA
0.00010598369425154501	NC_044370.1	42927601	42930599	+	37.4453	2998	Intergenic	Intergenic	-18291	LOC115720503	LOC115720503	XM_030649650	uncharacterized LOC115720503	protein_coding	NA	NA	NA	NA	NA	NA
0.00010598369425154501-2	NC_044379.1	973601	975999	+	37.4453	2398	Intergenic	Intergenic	-561997	LOC115698860	LOC115698860	XM_030626068	amino acid transporter AVT1I	protein_coding	1.967867848	0.196163411	0.757198644	3.391531314	0.001859284	0.019698994
6.3993357551182535e-06	NC_044377.1	73310601	73314399	+	37.4409	3798	Intergenic	Intergenic	-19957	LOC115725670	LOC115725670	XM_030655254	GATA transcription factor 5	protein_coding	0.602504834	1	1	1.079961015	0.783386466	1
2.6908189439431366e-05-2	NC_044374.1	26611001	26613199	+	37.4301	2198	Intergenic	Intergenic	-39265	LOC115717047	LOC115717047	XM_030645989	cyclin-dependent kinase F-4,	protein_coding	0.512595994	1	1	0.654252863	1	1
0.001947693938316672-2	NC_044372.1	19490601	19492199	+	37.4301	1598	Intergenic	Intergenic	-47704	LOC115708648	LOC115708648	XM_030636627	mini zinc finger protein 3	protein_coding	-6.21155716	5.10562E-09	1.02878E-07	0.282306532	1	1
0.001947693938316672-4	NC_044379.1	3614001	3615599	+	37.4301	1598	Intergenic	Intergenic	50202	LOC115701762	LOC115701762	XR_004008747	28S ribosomal RNA	rRNA	-0.186933101	1	1	-1.374051984	0.564145906	1
0.00011014787905885273	NC_044374.1	77194001	77196599	+	37.4301	2598	Intergenic	Intergenic	354742	LOC115718006	LOC115718006	XM_030646974	uncharacterized LOC115718006	protein_coding	0	1	NA	-0.410947537	1	NA
0.00045788614017227305	NC_044372.1	43326801	43329799	+	37.4301	2998	Intergenic	Intergenic	3197	LOC115710705	LOC115710705	XM_030639056	uncharacterized LOC115710705	protein_coding	NA	NA	NA	NA	NA	NA
0.001947693938316672	NC_044370.1	71262401	71264399	+	37.4301	1998	Intergenic	Intergenic	-18652	LOC115702552	LOC115702552	XM_030629974	late embryogenesis abundant protein D-34-like	protein_coding	-3.705180376	0.001763887	0.013572059	-4.684751381	1.89981E-05	0.00035285
0.001947693938316672-3	NC_044377.1	13954401	13955999	+	37.4301	1598	Intergenic	Intergenic	38873	LOC115694994	LOC115694994	XM_030622093	transcription factor MYB44-like	protein_coding	-0.26735926	1	1	0.294556318	1	1
2.6908189439431366e-05	NC_044371.1	63544001	63547199	+	37.4301	3198	Intergenic	Intergenic	-12743	LOC115706655	LOC115706655	XM_030634371	PRA1 family protein B3	protein_coding	-0.325305059	1	1	0.254842389	1	1
1.7786100125992856e-09	NC_044378.1	27851001	27858199	+	37.4242	7198	Intergenic	Intergenic	7482	LOC115696467	LOC115696467	XM_030623369	uncharacterized LOC115696467	protein_coding	NA	NA	NA	NA	NA	NA
0.00011447675327294355	NC_044375.1	1053401	1056199	+	37.4148	2798	promoter-TSS	-promoter-TSS (LOC115720804)	-434	LOC115720804	LOC115720804	XM_030649979	putative disease resistance protein RGA1,	protein_coding	0.314737088	1	1	1.069258996	0.851917204	1
1.7852178907626068e-06	NC_044372.1	20060001	20063199	+	37.4109	3198	exon	-exon (LOC115710518, exon 1 of 4)	337	LOC115710518	LOC115710518	XM_030638880	zinc finger BED domain-containing protein RICESLEEPER 2-like	protein_coding	-0.375278124	1	NA	1.474338583	0.849664508	NA
0.0020269632339441953	NC_044375.1	7997401	7998999	+	37.4045	1598	Intergenic	Intergenic	12417	LOC115719357	LOC115719357	XM_030648361	beta-glucosidase BoGH3B	protein_coding	-0.128444321	1	1	-1.678433621	0.131923728	0.656476785
0.0020269632339441953-2	NC_044378.1	14102601	14104599	+	37.4045	1998	Intergenic	Intergenic	36823	LOC115696363	LOC115696363	XM_030623264	uncharacterized LOC115696363	protein_coding	NA	NA	NA	NA	NA	NA
2.904375319652284e-05	NC_044373.1	19996401	19999399	+	37.4045	2998	Intergenic	Intergenic	-14972	LOC115713221	LOC115713221	XM_030641704	heavy metal-associated isoprenylated plant protein 8-like	protein_coding	NA	NA	NA	NA	NA	NA
0.00011897688199745323	NC_044375.1	85025601	85029199	+	37.3993	3598	Intergenic	Intergenic	-47687	LOC115718399	LOC115718399	XM_030647166	UDP-glycosyltransferase 71K1-like	protein_coding	4.986015861	4.78329E-06	6.11771E-05	-1.171012192	0.814781047	1
3.0174573575572803e-05	NC_044370.1	27575001	27577399	+	37.3915	2398	Intergenic	Intergenic	16521	LOC115719286	LOC115719286	XM_030648269	uncharacterized LOC115719286	protein_coding	NA	NA	NA	NA	NA	NA
0.0004951099028722808-2	NC_044376.1	36891401	36894199	+	37.3915	2798	Intergenic	Intergenic	-22713	LOC115722286	LOC115722286	XM_030651454	transcription factor SRM1,	protein_coding	1.023134591	0.926269241	1	0.789485296	1	1
0.0004951099028722808	NC_044374.1	66233601	66236399	+	37.3915	2798	Intergenic	Intergenic	-58543	LOC115716951	LOC115716951	XM_030645879	ubiquitin-conjugating enzyme E2 22,	protein_coding	0.017787671	1	1	0.136379062	1	1
0.0021095121470500653	NC_044372.1	81232801	81234799	+	37.3784	1998	Intergenic	Intergenic	7180	LOC115709675	LOC115709675	XM_030637838	isoamylase 2, chloroplastic	protein_coding	0.607791183	1	1	0.763697298	1	1
0.0021095121470500653-2	NC_044373.1	89620001	89622399	+	37.3784	2398	Intergenic	Intergenic	-11054	LOC115712002	LOC115712002	XM_030640200	probable mitochondrial import inner membrane translocase subunit TIM21	protein_coding	-0.238809015	1	1	0.125557912	1	1
3.1349630161334065e-05	NC_044371.1	81391001	81395199	+	37.3784	4198	Intergenic	Intergenic	52523	LOC115705982	LOC115705982	XM_030633470	stemmadenine O-acetyltransferase	protein_coding	0.530425683	1	1	-4.18431025	1.3013E-14	9.29921E-13
0.0021095121470500653-3	NC_044376.1	19162601	19163799	+	37.3784	1198	Intergenic	Intergenic	27604	LOC115722008	LOC115722008	XM_030651124	uncharacterized LOC115722008	protein_coding	-1.596537342	0.295724481	1	1.619780907	0.286139938	1
0.0021095121470500653-4	NC_044378.1	43859601	43861599	+	37.3784	1998	Intergenic	Intergenic	-21587	LOC115697253	LOC115697253	XM_030624182	beta-catenin-like protein 1,	protein_coding	-0.06417496	1	1	0.253936063	1	1
1.359271006034283e-07	NC_044372.1	44776401	44783999	+	37.3758	7598	Intergenic	Intergenic	12115	LOC115711467	LOC115711467	XR_004010498	uncharacterized LOC115711467	lncRNA	NA	NA	NA	NA	NA	NA
0.0005148530865802385-3	NC_044375.1	15510201	15511599	+	37.3719	1398	Intergenic	Intergenic	5714	LOC115719911	LOC115719911	XM_030649085	receptor-like protein 54	protein_coding	0.862839784	1	1	0.362079339	1	1
0.0005148530865802385-2	NC_044370.1	96691801	96694399	+	37.3719	2598	Intergenic	Intergenic	33896	LOC115695837	LOC115695837	XM_030622928	uncharacterized LOC115695837	protein_coding	NA	NA	NA	NA	NA	NA
0.0005148530865802385	NC_044370.1	31727201	31729999	+	37.3719	2798	Intergenic	Intergenic	148367	LOC115703275	LOC115703275	XR_004009052	small nucleolar RNA R71	snoRNA	NA	NA	NA	NA	NA	NA
8.344981451410788e-06	NC_044373.1	54524001	54526399	+	37.3634	2398	Intergenic	Intergenic	-28433	LOC115714513	LOC115714513	XM_030643239	uncharacterized LOC115714513	protein_coding	-6.433272274	0.008380499	0.053379166	-1.308101537	0.88777689	1
0.0021954793276851878-3	NW_022060417.1	45001	46799	+	37.352	1798	Intergenic	Intergenic	-37336	LOC115702063	LOC115702063	XM_030629513	#N/A	protein_coding	NA	NA	NA	NA	NA	NA
0.0021954793276851878-2	NC_044378.1	16813201	16814799	+	37.352	1598	Intergenic	Intergenic	66747	LOC115698346	LOC115698346	XR_004008099	small nucleolar RNA R71	snoRNA	NA	NA	NA	NA	NA	NA
0.00013357447513502162	NC_044374.1	69282401	69284799	+	37.352	2398	TTS	-TTS (LOC115715603)	454	LOC115717930	LOC115717930	XM_030646897	uncharacterized LOC115717930	protein_coding	NA	NA	NA	NA	NA	NA
0.0005353916054468345	NC_044378.1	13460001	13461999	+	37.352	1998	Intergenic	Intergenic	-11825	LOC115698137	LOC115698137	XM_030625313	protein MIZU-KUSSEI 1	protein_coding	-1.099600968	0.980391776	NA	-0.410947537	1	NA
0.0021954793276851878	NC_044371.1	65243801	65244599	+	37.352	798	Intergenic	Intergenic	39039	LOC115704243	LOC115704243	XM_030631457	uncharacterized LOC115704243	protein_coding	NA	NA	NA	NA	NA	NA
9.351192149327334e-06	NC_044370.1	4398001	4401999	+	37.329	3998	promoter-TSS	-promoter-TSS (LOC115703034)	-530	LOC115703034	LOC115703034	XM_030630518	iridoid synthase CYC2	protein_coding	-0.625218657	1	1	-8.310349269	1.3144E-37	5.26389E-35
0.002285009458711642	NC_044372.1	5138001	5139799	+	37.3252	1798	Intergenic	Intergenic	-4237	LOC115709042	LOC115709042	XM_030637071	cytochrome P450 71A1	protein_coding	2.162439067	0.026161553	0.142425241	0.914786245	1	1
0.00014429523522517445	NC_044370.1	6658801	6662199	+	37.3198	3398	Intergenic	Intergenic	23688	LOC115703186	LOC115703186	XM_030630707	allene oxide synthase 3	protein_coding	-2.106773529	0.429355799	1	-8.063822337	3.76125E-07	9.82371E-06
2.6034829505774833e-06	NC_044378.1	9012001	9015599	+	37.3116	3598	Intergenic	Intergenic	-5083	LOC115697129	LOC115697129	XM_030624044	auxin transporter-like protein 2	protein_coding	-0.137475861	1	1	2.156944766	0.002461166	0.024887421
0.0005789857984078189-3	NC_044379.1	4562401	4564799	+	37.3116	2398	exon	-exon (LOC115699131, exon 3 of 3)	2769	LOC115699131	LOC115699131	XM_030626377	uncharacterized LOC115699131	protein_coding	-1.143820885	0.971670632	NA	0	1	NA
0.0005789857984078189-2	NC_044379.1	2873601	2875999	+	37.3116	2398	Intergenic	Intergenic	28732	LOC115698752	LOC115698752	XM_030625919	ribonuclease 3	protein_coding	1.548272136	0.316368768	1	-3.637547498	5.19211E-08	1.55707E-06
0.0005789857984078189	NC_044373.1	24791201	24793599	+	37.3116	2398	Intergenic	Intergenic	-25463	LOC115715517	LOC115715517	XR_004011385	small nucleolar RNA R71	snoRNA	NA	NA	NA	NA	NA	NA
2.7036462083798085e-06	NC_044378.1	48321601	48325799	+	37.3014	4198	Intergenic	Intergenic	-101897	LOC115696615	LOC115696615	XM_030623510	uncharacterized LOC115696615	protein_coding	NA	NA	NA	NA	NA	NA
3.943135558433972e-05-2	NC_044379.1	1683601	1686399	+	37.2979	2798	Intergenic	Intergenic	-1104789	LOC115698919	LOC115698919	XM_030626122	extracellular ribonuclease LE	protein_coding	-2.667802986	0.007814691	0.050323215	-6.151631711	1.46512E-17	1.49016E-15
3.943135558433972e-05	NC_044374.1	59919001	59922599	+	37.2979	3598	Intergenic	Intergenic	389372	LOC115716857	LOC115716857	XR_004011616	uncharacterized LOC115716857	lncRNA	NA	NA	NA	NA	NA	NA
0.002378253528651847	NC_044372.1	53151801	53153599	+	37.2979	1798	Intergenic	Intergenic	35051	LOC115708760	LOC115708760	XM_030636770	uncharacterized LOC115708760,	protein_coding	0.377844953	1	1	0.419031854	1	1
0.0006021104686964884-2	NC_044370.1	82326601	82328799	+	37.291	2198	Intergenic	Intergenic	-87798	LOC115722827	LOC115722827	XR_004012858	uncharacterized LOC115722827,	lncRNA	NA	NA	NA	NA	NA	NA
0.0006021104686964884	NC_044370.1	70380001	70382399	+	37.291	2398	Intergenic	Intergenic	-26605	LOC115713805	LOC115713805	XR_004011009	uncharacterized LOC115713805	lncRNA	2.971581015	4.95775E-06	6.32401E-05	1.300163672	0.434386255	1
0.0006021104686964884-3	NC_044375.1	28441201	28443599	+	37.291	2398	Intergenic	Intergenic	-6010	LOC115719673	LOC115719673	XM_030648802	phosphoribosylaminoimidazole carboxylase, chloroplastic,	protein_coding	0.666960879	1	1	1.095438096	0.477531763	1
0.0006261685829828832	NC_044370.1	29296401	29297999	+	37.2702	1598	Intergenic	Intergenic	-92163	LOC115709427	LOC115709427	XM_030637533	trihelix transcription factor GT-2	protein_coding	1.483172589	0.007608714	0.049213431	-0.288136392	1	1
0.00016202327619413014	NC_044378.1	16819801	16822599	+	37.2702	2798	Intergenic	Intergenic	73947	LOC115698346	LOC115698346	XR_004008099	small nucleolar RNA R71	snoRNA	NA	NA	NA	NA	NA	NA
1.130610068217485e-05	NC_044373.1	43041001	43044799	+	37.2702	3798	Intergenic	Intergenic	-203093	LOC115713438	LOC115713438	XM_030641921	uncharacterized LOC115713438	protein_coding	-0.374376113	1	NA	0	1	NA
[truncated: 4,619 more rows]

## Sheet: Leaf_annotate_H3K27me3
p-value	Chr	Start	End	Strand	Peak Score	Focus Ratio/Region Size	Annotation	Detailed Annotation	Distance to TSS	Nearest PromoterID	Entrez ID	Nearest Unigene	Nearest Gene Description	Gene Type	Leaf vs. Stem log2FC	Leaf vs. Stem p-value	Leaf vs. Stem p-adj(FDR)	Leaf vs. Trichome log2FC	Leaf vs. Trichome p-value	Leaf vs. Trichome p-adj(FDR)
[truncated: 15,819 more rows]

[truncated: 4 more sheets: Leaf_H3K56ac_peaks, Leaf_H3K4me3_peaks, Barplot, Cs10_genes]
