# Supplementary material for: Characterization of the Cannabis sativa glandular trichome epigenome
Source: bioRxiv preprint, doi:10.1101/2024.07.04.602151, version 1 (2024-07-08)
Supplement: Additional File 4 [file 602151_file05.xlsx]

## Sheet: Read_Me
This document contains the annotated chromatin peaks for H3K4me3, H3K56ac, H3K27me3, and H2A.Z for stem tissue. These histone modification ChIP-seq peaks were annotated using HOMER annotatePeaks.pl script and provide structural genomic context to the peaks used in this study.

## Sheet: Stem_annotate_H2AZ
p-value	Chr	Start	End	Strand	Peak Score	Focus Ratio/Region Size	Annotation	Detailed Annotation	Distance to TSS	Nearest PromoterID	Entrez ID	Nearest Unigene	Nearest Gene Description	Gene Type	Stem vs. Leaf log2FC	Stem vs. Leaf p-value	Stem vs. Leaf p-adj(FDR)	Stem vs. Trichome log2FC	Stem vs. Trichome p-value	Stem vs. Trichome p-adj(FDR)
1.0353740693318562e-138	NC_044371.1	20041401	20042599	+	568.148	1198	Intergenic	Intergenic	9480	LOC115705441	LOC115705441	XM_030632777	CDP-diacylglycerol--glycerol-3-phosphate 3-phosphatidyltransferase 2	protein_coding	-0.904430982	1	1	0.150963129	1	1
3.3861586598332114e-87	NC_044377.1	42065201	42066599	+	335.426	1398	Intergenic	Intergenic	-69459	LOC115695196	LOC115695196	XM_030622282	uncharacterized LOC115695196	protein_coding	NA	NA	NA	NA	NA	NA
2.4247978718342324e-09	NW_022060417.1	2323001	2323599	+	129.586	598	Intergenic	Intergenic	-16259	LOC115702065	LOC115702065	XM_030629515	#N/A	protein_coding	-0.8199085	1	1	0.113826937	1	1
4.145510359501722e-10	NC_044376.1	17660801	17662199	+	123.472	1398	Intergenic	Intergenic	18070	LOC115724350	LOC115724350	XR_004013146	small nucleolar RNA R71	snoRNA	NA	NA	NA	NA	NA	NA
1.6562198376342732e-09	NC_044372.1	84874001	84875399	+	122.555	1398	Intergenic	Intergenic	10189	LOC115710276	LOC115710276	XM_030638638	uncharacterized LOC115710276	protein_coding	4.943197771	0.006846849	0.044859226	1.432038175	0.640288445	1
1.8794437066445473e-08	NC_044374.1	13485401	13485999	+	119.401	598	Intergenic	Intergenic	-30292	LOC115716882	LOC115716882	XM_030645796	pre-mRNA cleavage factor Im 25 kDa subunit 2	protein_coding	0.451295944	1	1	0.405072039	1	1
6.002092335036552e-07	NC_044371.1	57836601	57836999	+	118.405	398	Intergenic	Intergenic	-7784	LOC115706214	LOC115706214	XM_030633792	pathogen-associated molecular patterns-induced protein A70-like	protein_coding	0.26971359	1	1	0.784905527	1	1
3.260208568782121e-11	NC_044375.1	39868201	39868999	+	118.064	798	Intergenic	Intergenic	7466	TRNAC-GCA_4	TRNAC-GCA_4	TRNAC-GCA_4	#N/A	tRNA	NA	NA	NA	NA	NA	NA
3.7191574635703524e-08	NC_044379.1	21788001	21788799	+	116.364	798	promoter-TSS	-promoter-TSS (LOC115699185)	-1834	LOC115699185	LOC115699185	XM_030626465	uncharacterized LOC115699185,	protein_coding	-0.135952402	1	1	0.265106385	1	1
1.6936427456986194e-06	NC_044379.1	7590001	7590599	+	115.487	598	Intergenic	Intergenic	23777	LOC115701537	LOC115701537	XM_030629354	myb-like protein H	protein_coding	-0.412743847	1	1	4.337227235	0.051241534	0.33568503
1.8925447555019618e-06	NC_044372.1	18476201	18476799	+	110.474	598	Intergenic	Intergenic	119027	LOC115711816	LOC115711816	XR_004010686	small nucleolar RNA R71	snoRNA	NA	NA	NA	NA	NA	NA
6.070145904894386e-10	NC_044379.1	5650601	5651399	+	110.289	798	Intergenic	Intergenic	242934	LOC115701102	LOC115701102	XM_030628797	homeobox-leucine zipper protein ATHB-54-like	protein_coding	-0.819603728	1	1	-2.807728882	0.002802251	0.027313252
1.1302942183965784e-07	NC_044372.1	62052001	62052599	+	110.217	598	Intergenic	Intergenic	-87381	LOC115711226	LOC115711226	XR_004010435	uncharacterized LOC115711226,	lncRNA	NA	NA	NA	NA	NA	NA
5.065044286240154e-10	NC_044372.1	63218001	63218799	+	110.11	798	Intergenic	Intergenic	-16761	LOC115710846	LOC115710846	XM_030639200	serine/arginine repetitive matrix protein 2-like	protein_coding	-1.549154128	0.89294272	NA	-1.850778641	0.833286398	NA
1.8693622957210023e-05	NC_044370.1	67454401	67454799	+	109.652	398	Intergenic	Intergenic	-27928	LOC115713581	LOC115713581	XM_030642072	protein SNOWY COTYLEDON 3	protein_coding	NA	NA	NA	NA	NA	NA
1.0918721904655568e-06	NC_044370.1	17714201	17714799	+	109.556	598	Intergenic	Intergenic	16150	LOC115705193	LOC115705193	XM_030632453	G-type lectin S-receptor-like serine/threonine-protein kinase At1g34300	protein_coding	-0.367632206	1	1	-0.103166723	1	1
3.146353197564429e-08	NC_044373.1	4962001	4962599	+	108.654	598	Intergenic	Intergenic	-8496	LOC115712787	LOC115712787	XM_030641146	non-functional NADPH-dependent codeinone reductase 2-like	protein_coding	1.03869951	0.932710609	1	1.988424781	0.031496118	0.222832765
2.6198765234541236e-08	NC_044377.1	6992201	6992999	+	108.46	798	Intergenic	Intergenic	1906	LOC115694916	LOC115694916	XM_030622018	uncharacterized LOC115694916	protein_coding	NA	NA	NA	NA	NA	NA
6.873539369464238e-11	NC_044379.1	6532201	6532999	+	108.405	798	Intergenic	Intergenic	71046	LOC115701573	LOC115701573	XR_004008577	uncharacterized LOC115701573,	lncRNA	-0.283270345	1	1	-0.198953885	1	1
1.8160109226472096e-08	NC_044373.1	46035601	46036799	+	108.09	1198	Intergenic	Intergenic	20455	LOC115715041	LOC115715041	XM_030643830	uncharacterized LOC115715041,	protein_coding	1.146712195	0.51409698	1	0.29295647	1	1
1.5117767400570505e-08	NC_044373.1	53868601	53869399	+	107.913	798	Intergenic	Intergenic	8930	LOC115714286	LOC115714286	XM_030642932	dnaJ homolog subfamily B member 4	protein_coding	1.544944803	0.026016299	0.141813076	-0.134126688	1	1
3.010734892238832e-07	NC_044375.1	45213001	45213399	+	107.827	398	Intergenic	Intergenic	-14223	LOC115718713	LOC115718713	XR_004012011	uncharacterized LOC115718713	lncRNA	NA	NA	NA	NA	NA	NA
6.1404538036942495e-06	NC_044370.1	60783601	60783999	+	107.686	398	Intergenic	Intergenic	-28075	LOC115703460	LOC115703460	XR_004009222	small nucleolar RNA R71	snoRNA	NA	NA	NA	NA	NA	NA
4.232785626203108e-06	NC_044370.1	25176801	25177399	+	107.158	598	Intergenic	Intergenic	-14981	LOC115702466	LOC115702466	XR_004008885	uncharacterized LOC115702466	lncRNA	0.800595645	1	1	-0.012634043	1	1
8.268330890254623e-08	NC_044376.1	24680401	24681799	+	106.509	1398	Intergenic	Intergenic	2746	LOC115724149	LOC115724149	XM_030653613	NDR1/HIN1-like protein 6	protein_coding	-1.785501878	0.600318817	1	-4.100118216	0.038161666	0.262520179
2.4212918373325802e-06	NC_044370.1	80892201	80892799	+	106.454	598	Intergenic	Intergenic	20810	LOC115702588	LOC115702588	XM_030630000	histidine-containing phosphotransfer protein 4	protein_coding	-2.611682525	0.006302074	0.041644815	-4.798569303	6.3158E-11	1.94424E-09
2.4212918373325802e-06-2	NC_044377.1	73536601	73537199	+	106.454	598	Intergenic	Intergenic	-14807	LOC115724663	LOC115724663	XM_030654003	myosin-15,	protein_coding	0.37438412	1	NA	-0.036563417	1	NA
9.537090609206555e-07	NC_044375.1	82694801	82695399	+	105.47	598	Intergenic	Intergenic	-3313	LOC115719326	LOC115719326	XM_030648313	ran-binding protein 1 homolog b	protein_coding	0.339582384	1	1	1.040786742	0.744764979	1
6.569142081981502e-07	NC_044374.1	51321001	51321399	+	105.13	398	Intergenic	Intergenic	63015	LOC115717830	LOC115717830	XM_030646801	uncharacterized LOC115717830	protein_coding	NA	NA	NA	NA	NA	NA
2.8761951914594605e-05	NC_044377.1	24486601	24486999	+	104.97	398	Intergenic	Intergenic	382452	LOC115695060	LOC115695060	XM_030622157	uncharacterized LOC115695060	protein_coding	NA	NA	NA	NA	NA	NA
1.0811430388329171e-08	NW_022060454.1	879001	879799	+	104.97	798	Intergenic	Intergenic	375242	LOC115702127	LOC115702127	XM_030629586	#N/A	protein_coding	-1.214863418	0.74862229	1	-0.136444746	1	1
4.524729532299808e-07	NC_044373.1	57047401	57047999	+	104.816	598	Intergenic	Intergenic	-6396	LOC115713014	LOC115713014	XR_004010974	uncharacterized LOC115713014	lncRNA	-1.549169232	0.892939793	NA	0	1	NA
3.1165837298857437e-07	NC_044377.1	22993201	22993799	+	104.524	598	Intergenic	Intergenic	-57561	LOC115695057	LOC115695057	XM_030622155	uncharacterized LOC115695057	protein_coding	-1.549169232	0.892939793	NA	0	1	NA
2.5865777669022353e-07	NC_044372.1	77255201	77255799	+	104.386	598	Intergenic	Intergenic	-23182	LOC115710719	LOC115710719	XM_030639074	BTB/POZ domain-containing protein At5g03250-like	protein_coding	0.374405022	1	1	-3.992473756	0.355827799	1
1.4787381270650113e-07	NC_044374.1	30598201	30598999	+	104	798	Intergenic	Intergenic	16197	LOC115717698	LOC115717698	XM_030646678	uncharacterized LOC115717698	protein_coding	NA	NA	NA	NA	NA	NA
7.672790267889368e-06	NC_044372.1	14695801	14696399	+	103.595	598	Intergenic	Intergenic	-16413	LOC115711872	LOC115711872	XR_004010739	small nucleolar RNA R71	snoRNA	NA	NA	NA	NA	NA	NA
7.672790267889368e-06-2	NC_044375.1	55884601	55885199	+	103.595	598	intron	-intron (LOC115719187, intron 1 of 4)	11450	LOC115719187	LOC115719187	XM_030648132	non-specific phospholipase C2	protein_coding	5.064932992	2.78167E-37	5.74969E-35	2.673138404	4.46951E-08	9.78607E-07
5.824959682667829e-08	NC_044378.1	3198001	3198799	+	103.435	798	Intergenic	Intergenic	7638	LOC115697084	LOC115697084	XM_030623994	uncharacterized LOC115697084	protein_coding	-0.901133549	1	1	-0.5161698	1	1
4.6515616597694895e-10	NC_044371.1	62152201	62153999	+	103.358	1798	Intergenic	Intergenic	6324	LOC115704193	LOC115704193	XM_030631409	uncharacterized mitochondrial protein AtMg00810-like	protein_coding	0.374376113	1	NA	0.925217262	1	NA
4.8350017379405474e-08	NC_044378.1	51100601	51101599	+	103.333	998	Intergenic	Intergenic	-19428	LOC115696857	LOC115696857	XM_030623739	transcription factor bHLH30	protein_coding	-0.210794793	1	1	1.157901614	0.513369296	1
5.2622155045094875e-06	NC_044377.1	66650201	66650999	+	103.283	798	Intergenic	Intergenic	-3814	LOC115695392	LOC115695392	XM_030622458	uncharacterized LOC115695392	protein_coding	NA	NA	NA	NA	NA	NA
4.358242352179949e-06	NC_044377.1	37902401	37902999	+	103.137	598	exon	-exon (LOC115695157, exon 1 of 1)	339	LOC115695157	LOC115695157	XM_030622247	uncharacterized mitochondrial protein AtMg00860-like	protein_coding	NA	NA	NA	NA	NA	NA
2.989990692103437e-06-3	NC_044377.1	4801601	4802399	+	102.864	798	Intergenic	Intergenic	-9272	LOC115694889	LOC115694889	XM_030621993	uncharacterized LOC115694889	protein_coding	NA	NA	NA	NA	NA	NA
2.989990692103437e-06-2	NC_044375.1	34776001	34776599	+	102.864	598	promoter-TSS	-promoter-TSS (LOC115720667)	-1011	LOC115720667	LOC115720667	XM_030649830	39S ribosomal protein L45, mitochondrial	protein_coding	1.58859982	0.007192815	0.046904678	1.272884002	0.199615115	1
2.989990692103437e-06	NC_044372.1	45452201	45452799	+	102.864	598	Intergenic	Intergenic	-145473	LOC115710724	LOC115710724	XM_030639078	uncharacterized LOC115710724	protein_coding	NA	NA	NA	NA	NA	NA
2.4767734531118082e-06	NC_044379.1	33201801	33202399	+	102.736	598	Intergenic	Intergenic	-14355	LOC115700536	LOC115700536	XM_030628094	squamosa promoter-binding-like protein 6,	protein_coding	0.292294814	1	1	-0.365255553	1	1
1.313346111974913e-08	NC_044373.1	68086401	68087399	+	102.695	998	Intergenic	Intergenic	-9817	LOC115715143	LOC115715143	XM_030643959	probable glucan 1,3-beta-glucosidase A,	protein_coding	0.933416564	1	1	-0.888418323	1	1
4.200203048920702e-11	NC_044377.1	12760801	12761999	+	102.495	1198	Intergenic	Intergenic	7171	LOC115694988	LOC115694988	XM_030622089	uncharacterized LOC115694988	protein_coding	NA	NA	NA	NA	NA	NA
1.4082731656361345e-06-2	NW_022060497.1	19001	19599	+	102.382	598	NA	NA	NA	NA			#N/A		NA	NA	NA	NA	NA	NA
1.4082731656361345e-06	NC_044375.1	59234201	59234799	+	102.382	598	Intergenic	Intergenic	23321	LOC115719637	LOC115719637	XM_030648752	DDT domain-containing protein PTM,	protein_coding	0.345896655	1	1	-0.14686534	1	1
4.596156582844662e-14	NC_044373.1	8970001	8971599	+	102.128	1598	Intergenic	Intergenic	13892	LOC115712135	LOC115712135	XM_030640378	calmodulin-7	protein_coding	1.237670968	0.453688337	1	0.409051784	1	1
8.011526761846533e-07	NC_044378.1	50376801	50377399	+	102.068	598	Intergenic	Intergenic	145418	LOC115698405	LOC115698405	XR_004008153	small nucleolar RNA R71	snoRNA	NA	NA	NA	NA	NA	NA
2.462432693312025e-09	NC_044377.1	73614201	73615199	+	102.035	998	Intergenic	Intergenic	62993	LOC115724663	LOC115724663	XM_030654003	myosin-15,	protein_coding	0.37438412	1	NA	-0.036563417	1	NA
6.613966736153769e-12	NC_044377.1	19822401	19823799	+	101.971	1398	Intergenic	Intergenic	-44855	LOC115724911	LOC115724911	XM_030654283	citrate synthase, mitochondrial	protein_coding	0.420171975	1	1	0.411551119	1	1
2.5968306129188866e-07	NC_044374.1	1315001	1315599	+	101.533	598	intron	-intron (LOC115715811, intron 4 of 6)	6121	LOC115715811	LOC115715811	XM_030644482	terpene synthase 10	protein_coding	2.714886444	0.09902344	0.438600826	-3.852530935	5.77727E-06	9.46335E-05
1.784620625714556e-07	NC_044375.1	44944001	44944999	+	101.378	998	Intergenic	Intergenic	-161126	LOC115721173	LOC115721173	XM_030650426	NADPH-dependent aldehyde reductase 1, chloroplastic-like	protein_coding	0	1	1	-7.794300258	6.3466E-05	0.000870983
1.4795581418716e-07	NC_044375.1	28033201	28033999	+	101.304	798	Intergenic	Intergenic	-5815	LOC115719059	LOC115719059	XM_030647949	pentatricopeptide repeat-containing protein At4g31850, chloroplastic, 6	protein_coding	-0.561406909	1	1	-0.431895629	1	1
1.4795581418716e-07-2	NC_044376.1	28506801	28507599	+	101.304	798	Intergenic	Intergenic	-9865	LOC115723737	LOC115723737	XM_030653214	uncharacterized LOC115723737	protein_coding	NA	NA	NA	NA	NA	NA
1.226707744018761e-07	NC_044372.1	16459601	16460999	+	101.233	1398	Intergenic	Intergenic	32425	LOC115708959	LOC115708959	XM_030636983	transcription factor MYB113	protein_coding	-0.673396627	1	1	0.800778887	1	1
2.380567736090847e-13	NC_044370.1	26637001	26638399	+	101.233	1398	intron	-intron (LOC115708359, intron 3 of 3)	-57061	LOC115708229	LOC115708229	XM_030636451	ethylene-responsive transcription factor ERF110	protein_coding	2.66355675	0.000116861	0.001162142	-2.01435718	0.007571524	0.065131739
1.0171214825251995e-07	NC_044375.1	64778201	64778799	+	101.163	598	Intergenic	Intergenic	27971	LOC115718903	LOC115718903	XM_030647713	uncharacterized LOC115718903	protein_coding	-1.549169232	0.892939793	NA	0	1	NA
1.261697212145471e-10	NC_044378.1	22059401	22060399	+	101.163	998	Intergenic	Intergenic	-4474	LOC115696878	LOC115696878	XM_030623765	probable galacturonosyltransferase 6	protein_coding	-1.07234417	0.650281675	1	-0.105747169	1	1
8.43386994323071e-08	NC_044374.1	29811401	29811799	+	101.096	398	Intergenic	Intergenic	-40861	LOC115715598	LOC115715598	XM_030644242	COBW domain-containing protein 1	protein_coding	1.101805426	0.734413413	1	0.976105201	1	1
6.249677270418162e-05	NC_044377.1	19335601	19335999	+	100.906	398	Intergenic	Intergenic	-84446	LOC115695030	LOC115695030	XM_030622128	uncharacterized LOC115695030	protein_coding	NA	NA	NA	NA	NA	NA
4.809724731496997e-08	NC_044374.1	51927001	51927799	+	100.906	798	Intergenic	Intergenic	29655	LOC115717833	LOC115717833	XM_030646804	uncharacterized LOC115717833	protein_coding	NA	NA	NA	NA	NA	NA
3.988969252471763e-08	NC_044377.1	27461201	27461799	+	100.846	598	intron	-intron (LOC115695073, intron 2 of 3)	4716	LOC115695073	LOC115695073	XM_030622167	uncharacterized LOC115695073	protein_coding	NA	NA	NA	NA	NA	NA
3.3084303638749485e-08	NC_044377.1	75097201	75098399	+	100.788	1198	Intergenic	Intergenic	-6742	LOC115724680	LOC115724680	XR_004013253	uncharacterized LOC115724680	lncRNA	0.374376113	1	NA	0.925217262	1	NA
1.566280944552497e-08	NC_044374.1	11076001	11076999	+	100.571	998	exon	-exon (LOC115717559, exon 2 of 2)	300	LOC115717559	LOC115717559	XM_030646544	uncharacterized LOC115717559	protein_coding	0	1	NA	-0.998328082	1	NA
1.2993636386942614e-08	NC_044373.1	76269801	76271999	+	100.521	2198	Intergenic	Intergenic	-17326	LOC115712067	LOC115712067	XM_030640284	linamarin synthase 2	protein_coding	-1.437617656	0.133598711	0.559237297	0.508370844	1	1
2.90689319340776e-05	NC_044373.1	31533601	31533999	+	100.471	398	Intergenic	Intergenic	30586	LOC115714760	LOC115714760	XR_004011117	uncharacterized LOC115714760	lncRNA	1.369023481	0.910841784	NA	0.10245837	1	NA
2.90689319340776e-05-2	NC_044373.1	32981401	32981799	+	100.471	398	Intergenic	Intergenic	44062	LOC115714859	LOC115714859	XR_004011135	uncharacterized LOC115714859	lncRNA	NA	NA	NA	NA	NA	NA
8.943545548417845e-09	NC_044372.1	60624801	60625999	+	100.423	1198	Intergenic	Intergenic	-48427	LOC115710824	LOC115710824	XM_030639175	uncharacterized LOC115710824	protein_coding	NA	NA	NA	NA	NA	NA
2.401553690233234e-05	NW_022060431.1	6201	6599	+	100.377	398	NA	NA	NA	NA			#N/A		NA	NA	NA	NA	NA	NA
1.9843581370926718e-05	NC_044379.1	29701401	29701999	+	100.286	598	Intergenic	Intergenic	53507	LOC115699366	LOC115699366	XM_030626725	ferredoxin-dependent glutamate synthase, chloroplastic	protein_coding	-3.397653921	1.84432E-15	7.93139E-14	-1.575076719	0.056518974	0.362282197
2.9193226292613436e-09	NC_044370.1	43326801	43327799	+	100.159	998	Intergenic	Intergenic	52594	LOC115711048	LOC115711048	XM_030639393	agamous-like MADS-box protein AGL66,	protein_coding	1.996932068	0.061132246	0.293859758	4.000425058	2.35529E-06	4.09362E-05
2.9193226292613436e-09-2	NC_044373.1	81200401	81200999	+	100.159	598	Intergenic	Intergenic	14688	LOC115714956	LOC115714956	XM_030643719	uncharacterized LOC115714956	protein_coding	0.903745338	1	1	1.074157075	0.76469797	1
1.3553834589095769e-05	NC_044378.1	70381601	70382199	+	100.119	598	Intergenic	Intergenic	-10277	LOC115696863	LOC115696863	XM_030623747	sulfiredoxin, chloroplastic/mitochondrial	protein_coding	-1.860717226	0.001009956	0.008272001	-0.735928021	1	1
1.1204001566113299e-05	NC_044372.1	84157201	84157799	+	100.041	598	Intergenic	Intergenic	-3106	LOC115711744	LOC115711744	XR_004010622	small nucleolar RNA R71	snoRNA	NA	NA	NA	NA	NA	NA
1.3850704296421663e-09	NC_044372.1	2769401	2770599	+	100.003	1198	Intergenic	Intergenic	-3956	LOC115709559	LOC115709559	XM_030637687	F-box/FBD/LRR-repeat protein At1g51370-like	protein_coding	-0.587400571	1	NA	-0.989549918	1	NA
9.262791720772648e-06	NC_044378.1	17782001	17782599	+	99.9661	598	intron	-intron (LOC115696394, intron 1 of 1)	10973	LOC115696394	LOC115696394	XM_030623295	protein AGENET DOMAIN (AGD)-CONTAINING P1-like	protein_coding	NA	NA	NA	NA	NA	NA
7.921037972546867e-10	NW_022060476.1	65001	65999	+	99.8948	998	Intergenic	Intergenic	-666300	LOC115702188	LOC115702188	XM_030629636	#N/A	protein_coding	NA	NA	NA	NA	NA	NA
7.658907290764413e-06-3	NC_044379.1	5344201	5344799	+	99.8948	598	Intergenic	Intergenic	-58380	LOC115701194	LOC115701194	XM_030628916	39S ribosomal protein L28, mitochondrial	protein_coding	0.02710153	1	1	0.319866486	1	1
7.658907290764413e-06-2	NC_044374.1	72369401	72369999	+	99.8948	598	Intergenic	Intergenic	-358503	LOC115717969	LOC115717969	XM_030646937	uncharacterized LOC115717969	protein_coding	NA	NA	NA	NA	NA	NA
7.658907290764413e-06	NC_044372.1	56943801	56944399	+	99.8948	598	Intergenic	Intergenic	-36772	LOC115709369	LOC115709369	XM_030637455	uncharacterized LOC115709369	protein_coding	0.098028846	1	1	0.337712413	1	1
4.408547749804677e-14	NC_044374.1	57675001	57676599	+	99.8045	1598	Intergenic	Intergenic	-125747	LOC115716036	LOC115716036	XM_030644723	kinesin-like protein KIN-14J	protein_coding	0.404571866	1	1	-0.656228827	1	1
3.584249420283462e-06-2	NC_044371.1	45250601	45251399	+	99.6386	798	Intergenic	Intergenic	18742	LOC115707074	LOC115707074	XM_030634909	transcription factor TGA2.2,	protein_coding	-0.349989523	1	1	0.102268619	1	1
3.584249420283462e-06	NC_044370.1	102495401	102495999	+	99.6386	598	Intergenic	Intergenic	-22484	LOC115701007	LOC115701007	XR_004008484	uncharacterized LOC115701007	lncRNA	1.772305009	0.465957206	1	2.007977573	0.318286562	1
2.4536538332107605e-06	NC_044375.1	56931601	56932199	+	99.5254	598	Intergenic	Intergenic	40848	LOC115720211	LOC115720211	XM_030649367	#N/A	protein_coding	2.59020913	0.688027311	NA	1.406735347	0.917537053	NA
1.6804052119743977e-06-2	NC_044374.1	19691201	19691799	+	99.4206	598	Intergenic	Intergenic	-162251	LOC115715846	LOC115715846	XR_004011463	uncharacterized LOC115715846	lncRNA	NA	NA	NA	NA	NA	NA
1.6804052119743977e-06	NC_044370.1	22381201	22381999	+	99.4206	798	Intergenic	Intergenic	-6898	LOC115706975	LOC115706975	XM_030634767	ATP-dependent zinc metalloprotease FTSH 4, mitochondrial	protein_coding	-0.588902628	1	1	0.113950147	1	1
1.3908522236659959e-06-2	NW_022060487.1	571801	572399	+	99.3712	598	NA	NA	NA	NA			#N/A		NA	NA	NA	NA	NA	NA
1.3908522236659959e-06	NC_044374.1	11079601	11080199	+	99.3712	598	Intergenic	Intergenic	3700	LOC115717559	LOC115717559	XM_030646544	uncharacterized LOC115717559	protein_coding	0	1	NA	-0.998328082	1	NA
9.531087535185539e-07	NC_044376.1	27159201	27159999	+	99.2774	798	Intergenic	Intergenic	-9632	LOC115723200	LOC115723200	XM_030652635	pentatricopeptide repeat-containing protein At5g64320, mitochondrial,	protein_coding	0.450602517	1	1	-0.090071572	1	1
7.891050114293224e-07	NC_044372.1	76123001	76123599	+	99.233	598	Intergenic	Intergenic	65274	LOC115710946	LOC115710946	XM_030639294	uncharacterized LOC115710946	protein_coding	0.374390551	1	NA	-0.809083998	1	NA
7.606300831556282e-12	NC_044370.1	86405401	86407399	+	99.2114	1998	Intergenic	Intergenic	14631	LOC115725693	LOC115725693	XM_030655287	zinc finger BED domain-containing protein DAYSLEEPER-like	protein_coding	NA	NA	NA	NA	NA	NA
5.41050231968314e-07-2	NC_044377.1	44972801	44973399	+	99.1487	598	Intergenic	Intergenic	61832	LOC115696013	LOC115696013	XR_004007615	small nucleolar RNA R71	snoRNA	NA	NA	NA	NA	NA	NA
5.41050231968314e-07	NC_044374.1	61948401	61949199	+	99.1487	798	Intergenic	Intergenic	-68982	LOC115717886	LOC115717886	XM_030646856	uncharacterized mitochondrial protein AtMg00310-like	protein_coding	1.191161672	0.962318612	NA	1.742002822	0.854499492	NA
1.1916412290504097e-12	NC_044376.1	25593001	25595199	+	99.014	2198	Intergenic	Intergenic	92194	LOC115722975	LOC115722975	XM_030652368	inositol transporter 1,	protein_coding	-0.928127545	1	1	-1.067373263	0.701977184	1
2.5461795505777546e-07-2	NC_044374.1	1916201	1917199	+	98.9959	998	Intergenic	Intergenic	9029	LOC115716563	LOC115716563	XM_030645381	late embryogenesis abundant protein At5g17165,	protein_coding	2.01970048	2.58822E-06	3.45749E-05	0.622975017	1	1
2.5461795505777546e-07	NC_044370.1	51511601	51512399	+	98.9959	798	Intergenic	Intergenic	28264	LOC115708007	LOC115708007	XR_004009809	uncharacterized LOC115708007	lncRNA	NA	NA	NA	NA	NA	NA
1.7475259585016275e-07	NC_044379.1	8598001	8598999	+	98.9266	998	Intergenic	Intergenic	-12696	LOC115701617	LOC115701617	XR_004008609	small nucleolar RNA R71	snoRNA	NA	NA	NA	NA	NA	NA
1.7475259585016275e-07-2	NW_022060476.1	3001	3799	+	98.9266	798	Intergenic	Intergenic	-728400	LOC115702188	LOC115702188	XM_030629636	#N/A	protein_coding	NA	NA	NA	NA	NA	NA
1.44790583326776e-07	NC_044376.1	24805801	24806399	+	98.8934	598	TTS	-TTS (LOC115723212)	-6770	LOC115721772	LOC115721772	XM_030650846	telomerase reverse transcriptase	protein_coding	1.08864851	0.82483343	1	0.563722745	1	1
1.44790583326776e-07-2	NC_044378.1	38309201	38309999	+	98.8934	798	Intergenic	Intergenic	5717	LOC115698038	LOC115698038	XM_030625221	uncharacterized LOC115698038,	protein_coding	0.230801227	1	1	-0.158284562	1	1
2.2512760875288834e-13	NC_044379.1	2183801	2185399	+	98.8613	1598	Intergenic	Intergenic	-605189	LOC115698919	LOC115698919	XM_030626122	extracellular ribonuclease LE	protein_coding	2.667802986	0.007814691	0.050323215	-3.483828726	2.07725E-15	9.57681E-14
9.94188345208526e-08	NC_044372.1	37041001	37041999	+	98.8301	998	Intergenic	Intergenic	6991	LOC115709598	LOC115709598	XM_030637732	serine/threonine protein phosphatase 2A 57 kDa regulatory subunit B' beta isoform	protein_coding	-0.439821567	1	1	-0.915614782	1	1
9.94188345208526e-08-2	NC_044373.1	61429601	61430399	+	98.8301	798	Intergenic	Intergenic	-15974	LOC115712770	LOC115712770	XM_030641127	probable galacturonosyltransferase-like 9	protein_coding	-1.78961661	0.000506969	0.00448067	-2.100980457	1.02611E-06	1.87469E-05
4.691218914881891e-08	NC_044379.1	22271801	22272399	+	98.7139	598	Intergenic	Intergenic	-43937	LOC115698904	LOC115698904	XM_030626103	#N/A	protein_coding	0.37438412	1	NA	-0.036563417	1	NA
2.672658087072887e-08	NC_044375.1	43997201	43997999	+	98.6348	798	Intergenic	Intergenic	-14010	LOC115720115	LOC115720115	XM_030649277	uncharacterized LOC115720115	protein_coding	NA	NA	NA	NA	NA	NA
1.8373000852101227e-08	NC_044377.1	18089201	18090199	+	98.5855	998	Intergenic	Intergenic	14730	LOC115725666	LOC115725666	XM_030655251	benzyl alcohol O-benzoyltransferase	protein_coding	-0.813666622	1	1	-0.922250047	1	1
1.047663167597729e-08-2	NW_022060514.1	18401	19799	+	98.5161	1398	NA	NA	NA	NA			#N/A		NA	NA	NA	NA	NA	NA
1.047663167597729e-08	NC_044370.1	75106201	75106999	+	98.5161	798	Intergenic	Intergenic	-19805	LOC115714466	LOC115714466	XM_030643193	peamaclein	protein_coding	2.129413839	0.283588945	1	-4.595899573	3.36056E-08	7.5344E-07
2.830012372008977e-09	NC_044370.1	28358601	28359599	+	98.3728	998	promoter-TSS	-promoter-TSS (LOC115703319)	-1629	LOC115703319	LOC115703319	XR_004009094	small nucleolar RNA R71	snoRNA	NA	NA	NA	NA	NA	NA
2.830012372008977e-09-2	NC_044377.1	30151401	30152399	+	98.3728	998	Intergenic	Intergenic	80099	LOC115695086	LOC115695086	XM_030622179	uncharacterized LOC115695086	protein_coding	NA	NA	NA	NA	NA	NA
1.3410034013076062e-09	NC_044372.1	28662401	28663399	+	98.3007	998	Intergenic	Intergenic	8869	LOC115710588	LOC115710588	XR_004010401	uncharacterized LOC115710588	lncRNA	NA	NA	NA	NA	NA	NA
1.1127273033557337e-09-2	NC_044372.1	12975401	12976999	+	98.2836	1598	Intergenic	Intergenic	-17288	LOC115709656	LOC115709656	XR_004010266	uncharacterized LOC115709656	lncRNA	NA	NA	NA	NA	NA	NA
1.1127273033557337e-09	NC_044371.1	68303201	68305199	+	98.2836	1998	Intergenic	Intergenic	-30989	LOC115706084	LOC115706084	XM_030633600	hydroquinone glucosyltransferase	protein_coding	1.059979846	0.880919262	1	1.23983584	0.548555053	1
9.233498782948567e-10	NC_044370.1	64259601	64260599	+	98.2669	998	Intergenic	Intergenic	-75836	LOC115703401	LOC115703401	XR_004009167	small nucleolar RNA R71	snoRNA	NA	NA	NA	NA	NA	NA
5.277251015344778e-10	NC_044378.1	53296201	53297399	+	98.219	1198	Intergenic	Intergenic	-49173	LOC115696649	LOC115696649	XM_030623540	uncharacterized LOC115696649	protein_coding	NA	NA	NA	NA	NA	NA
1.7256490047049233e-10	NC_044379.1	30173401	30174599	+	98.1315	1198	Intergenic	Intergenic	7215	LOC115701605	LOC115701605	XR_004008598	small nucleolar RNA R71	snoRNA	NA	NA	NA	NA	NA	NA
4.691360874387957e-11	NC_044370.1	65471201	65472399	+	98.0415	1198	Intergenic	Intergenic	5311	LOC115723426	LOC115723426	XM_030652917	4,5:9,10-diseco-3-hydroxy-5,9,17-trioxoandrosta-1(10),2-diene-4-oate hydrolase	protein_coding	1.78215444	0.321313394	1	4.797828416	0.000111432	0.001457076
7.318056375290239e-12	NC_044373.1	14725801	14727199	+	97.9312	1398	intron	-intron (LOC115713186, intron 1 of 2)	402	LOC115713186	LOC115713186	XM_030641670	uncharacterized LOC115713186	protein_coding	NA	NA	NA	NA	NA	NA
1.4915194380962356e-13	NC_044372.1	69705201	69706799	+	97.7508	1598	Intergenic	Intergenic	479906	LOC115709988	LOC115709988	XM_030638275	protein REVEILLE 8,	protein_coding	-1.300410455	0.180898031	0.713290437	-0.272255282	1	1
2.8203386383130126e-14	NC_044377.1	73218201	73219999	+	97.689	1798	Intergenic	Intergenic	-26697	LOC115695473	LOC115695473	XM_030622536	uncharacterized LOC115695473	protein_coding	NA	NA	NA	NA	NA	NA
7.729795110094655e-15	NC_044372.1	68387801	68389799	+	97.6458	1998	Intergenic	Intergenic	-13181	LOC115711506	LOC115711506	XM_030639851	thylakoid membrane protein TERC, chloroplastic,	protein_coding	-2.015861759	4.80114E-08	8.44394E-07	-0.69881123	1	1
9.183890607299442e-07-2	NC_044375.1	60897801	60898599	+	96.7239	798	Intergenic	Intergenic	-41680	LOC115718972	LOC115718972	XM_030647806	probable protein phosphatase 2C 33,	protein_coding	-1.143618233	0.391870789	1	-0.566228215	1	1
1.959705379732078e-06-3	NC_044373.1	6709401	6710199	+	96.7239	798	intron	-intron (LOC115713129, intron 1 of 2)	700	LOC115713129	LOC115713129	XM_030641615	uncharacterized LOC115713129	protein_coding	NA	NA	NA	NA	NA	NA
1.6211539688012063e-06-2	NC_044373.1	29317201	29317799	+	96.7239	598	intron	-intron (LOC115713307, intron 2 of 6)	5596	LOC115713307	LOC115713307	XM_030641786	putative pentatricopeptide repeat-containing protein At3g47840	protein_coding	1.138422392	0.831824587	1	0.299776237	1	1
5.207768544062559e-07-3	NC_044375.1	84829601	84830599	+	96.7239	998	Intergenic	Intergenic	-4723	LOC115721337	LOC115721337	XM_030650610	pleckstrin homology domain-containing protein 1	protein_coding	-0.071420174	1	1	-0.061298612	1	1
1.6789315951205492e-07	NC_044370.1	21862601	21863399	+	96.7239	798	Intergenic	Intergenic	-12458	LOC115706519	LOC115706519	XR_004009598	uncharacterized LOC115706519	lncRNA	NA	NA	NA	NA	NA	NA
6.291178327022813e-07	NC_044370.1	73995801	73996599	+	96.7239	798	Intergenic	Intergenic	47889	LOC115714390	LOC115714390	XM_030643079	uncharacterized LOC115714390	protein_coding	NA	NA	NA	NA	NA	NA
3.429101968609299e-05-2	NC_044370.1	102455601	102455999	+	96.7239	398	Intergenic	Intergenic	-62384	LOC115701007	LOC115701007	XR_004008484	uncharacterized LOC115701007	lncRNA	1.772305009	0.465957206	1	2.007977573	0.318286562	1
4.311360768537063e-07-2	NC_044372.1	67969201	67969999	+	96.7239	798	Intergenic	Intergenic	26789	LOC115711309	LOC115711309	XM_030639646	pathogenesis-related protein 1C	protein_coding	0.348897805	1	1	-2.728172087	0.07508272	0.458955688
1.2177230319695777e-11	NC_044377.1	69349801	69351199	+	96.7239	1398	Intergenic	Intergenic	-6690	LOC115695420	LOC115695420	XM_030622485	uncharacterized LOC115695420	protein_coding	NA	NA	NA	NA	NA	NA
5.068196411796826e-06-5	NC_044377.1	11916201	11916799	+	96.7239	598	Intergenic	Intergenic	10476	LOC115694978	LOC115694978	XM_030622082	uncharacterized mitochondrial protein AtMg00240-like	protein_coding	NA	NA	NA	NA	NA	NA
4.155835055575293e-05	NC_044374.1	23723201	23723599	+	96.7239	398	Intergenic	Intergenic	-49228	LOC115716710	LOC115716710	XR_004011593	uncharacterized LOC115716710	lncRNA	7.524587558	6.10018E-05	0.0006436	-1.899488342	0.536183753	1
5.068196411796826e-06-3	NC_044373.1	23872401	23873199	+	96.7239	798	Intergenic	Intergenic	9586	LOC115713262	LOC115713262	XM_030641744	uncharacterized LOC115713262	protein_coding	0.374376113	1	NA	0.925217262	1	NA
6.897511966489483e-09	NC_044372.1	57748601	57749599	+	96.7239	998	Intergenic	Intergenic	46573	LOC115711493	LOC115711493	XM_030639834	squamosa promoter-binding-like protein 6,	protein_coding	1.524613716	0.083564449	0.380924685	-1.94288256	9.45446E-05	0.001251251
4.311360768537063e-07	NC_044370.1	5841401	5842199	+	96.7239	798	Intergenic	Intergenic	-10973	LOC115703143	LOC115703143	XM_030630642	#N/A	protein_coding	0.063649394	1	1	0.100461478	1	1
9.183890607299442e-07-4	NC_044377.1	33930201	33930999	+	96.7239	798	Intergenic	Intergenic	-4201	LOC115696149	LOC115696149	XR_004007740	small nucleolar RNA R71	snoRNA	NA	NA	NA	NA	NA	NA
3.429101968609299e-05	NC_044370.1	57138201	57138799	+	96.7239	598	Intergenic	Intergenic	8547	LOC115703463	LOC115703463	XR_004009225	small nucleolar RNA R71	snoRNA	NA	NA	NA	NA	NA	NA
3.4715243986319715e-10	NC_044375.1	74931001	74932199	+	96.7239	1198	Intergenic	Intergenic	73281	LOC115718555	LOC115718555	XM_030647354	dof zinc finger protein DOF2.4	protein_coding	-1.246044558	0.572949046	1	-0.208082395	1	1
1.3906901831209784e-07	NC_044372.1	33111601	33112799	+	96.7239	1198	Intergenic	Intergenic	-10689	LOC115709946	LOC115709946	XM_030638217	fumarate hydratase 1, mitochondrial	protein_coding	0.323479197	1	1	-0.173754161	1	1
4.155835055575293e-05-2	NC_044375.1	34946401	34946999	+	96.7239	598	Intergenic	Intergenic	-24043	LOC115721314	LOC115721314	XM_030650587	uncharacterized LOC115721314,	protein_coding	-1.812236392	0.001903565	0.014457615	-0.425531853	1	1
2.3361077759013213e-05-3	NW_022060388.1	43801	44399	+	96.7239	598	NA	NA	NA	NA			#N/A		NA	NA	NA	NA	NA	NA
5.3900527901692056e-11	NC_044374.1	54444201	54445399	+	96.7239	1198	Intergenic	Intergenic	36977	LOC115717852	LOC115717852	XM_030646822	uncharacterized LOC115717852	protein_coding	NA	NA	NA	NA	NA	NA
1.3154708548990786e-05	NC_044370.1	46112601	46113199	+	96.7239	598	Intergenic	Intergenic	1776	TRNAN-GUU_15	TRNAN-GUU_15	TRNAN-GUU_15	#N/A	tRNA	NA	NA	NA	NA	NA	NA
5.207768544062559e-07-5	NC_044377.1	66847201	66848199	+	96.7239	998	Intergenic	Intergenic	11252	LOC115695397	LOC115695397	XM_030622463	probable inactive receptor kinase At1g48480	protein_coding	-0.010484403	1	1	1.096982171	0.946002185	1
4.4991697068696995e-08-2	NC_044379.1	30180201	30180999	+	96.7239	798	Intergenic	Intergenic	13815	LOC115701605	LOC115701605	XR_004008598	small nucleolar RNA R71	snoRNA	NA	NA	NA	NA	NA	NA
1.281791740401853e-09	NC_044374.1	61146601	61147599	+	96.7239	998	Intergenic	Intergenic	-107678	LOC115717880	LOC115717880	XM_030646850	uncharacterized LOC115717880	protein_coding	NA	NA	NA	NA	NA	NA
9.183890607299442e-07	NC_044371.1	31030601	31031199	+	96.7239	598	Intergenic	Intergenic	-11420	LOC115705463	LOC115705463	XM_030632799	nuclear-pore anchor,	protein_coding	0.039521016	1	1	0.117007522	1	1
2.3361077759013213e-05	NC_044377.1	65676801	65677199	+	96.7239	398	Intergenic	Intergenic	-24222	LOC115724448	LOC115724448	XM_030653734	uncharacterized LOC115724448	protein_coding	-1.911158348	0.005516431	0.037025963	-3.055340018	5.41259E-11	1.67671E-09
1.959705379732078e-06-5	NW_022060407.1	115601	116199	+	96.7239	598	Intergenic	Intergenic	-22329	LOC115702056	LOC115702056	XM_030629507	#N/A	protein_coding	0.036483252	1	1	0.151079659	1	1
1.6211539688012063e-06-3	NC_044375.1	13853201	13853999	+	96.7239	798	Intergenic	Intergenic	20242	LOC115719871	LOC115719871	XM_030649051	zinc finger MYM-type protein 1-like	protein_coding	NA	NA	NA	NA	NA	NA
5.207768544062559e-07-6	NC_044378.1	62448601	62449399	+	96.7239	798	Intergenic	Intergenic	-515180	LOC115698193	LOC115698193	XM_030625380	berberine bridge enzyme-like 13	protein_coding	0.315516531	1	1	0.180358922	1	1
5.068196411796826e-06	NC_044370.1	61177801	61178399	+	96.7239	598	Intergenic	Intergenic	-146832	LOC115703365	LOC115703365	XR_004009137	small nucleolar RNA R71	snoRNA	NA	NA	NA	NA	NA	NA
3.8235436516308643e-16	NC_044377.1	65897401	65899799	+	96.7239	2398	Intergenic	Intergenic	10509	LOC115725648	LOC115725648	XM_030655228	uncharacterized LOC115725648,	protein_coding	-0.116772853	1	1	1.606254664	0.065003339	0.407619914
2.245140236228973e-09-2	NW_022060378.1	244001	244999	+	96.7239	998	Intergenic	Intergenic	6023	LOC115702033	LOC115702033	XM_030629494	#N/A	protein_coding	NA	NA	NA	NA	NA	NA
1.5797918645284366e-12	NW_022060514.1	39001	40399	+	96.7239	1398	NA	NA	NA	NA			#N/A		NA	NA	NA	NA	NA	NA
8.978102160482682e-06	NC_044379.1	52570401	52570999	+	96.7239	598	Intergenic	Intergenic	-4813	LOC115699691	LOC115699691	XM_030627215	aconitate hydratase, cytoplasmic	protein_coding	-0.582785931	1	1	0.30086671	1	1
5.207768544062559e-07-2	NC_044375.1	24698801	24699799	+	96.7239	998	Intergenic	Intergenic	-78204	LOC115719965	LOC115719965	XM_030649136	uncharacterized LOC115719965	protein_coding	NA	NA	NA	NA	NA	NA
1.6211539688012063e-06	NC_044370.1	68265801	68266599	+	96.7239	798	Intergenic	Intergenic	61962	LOC115713694	LOC115713694	XM_030642176	uncharacterized LOC115713694	protein_coding	3.060164514	0.270245646	0.973015929	-1.842322802	0.59352624	1
1.6789315951205492e-07-2	NC_044370.1	72031601	72032399	+	96.7239	798	Intergenic	Intergenic	-13862	LOC115724198	LOC115724198	XM_030653682	uncharacterized LOC115724198	protein_coding	NA	NA	NA	NA	NA	NA
1.959705379732078e-06-2	NC_044372.1	26536601	26537199	+	96.7239	598	Intergenic	Intergenic	21491	LOC115711201	LOC115711201	XM_030639526	transcription factor PRE3	protein_coding	0	1	1	-5.750876908	0.03753269	0.259374393
6.108036086702115e-05	NC_044375.1	57561601	57561999	+	96.7239	398	Intergenic	Intergenic	-111042	LOC115721522	LOC115721522	XR_004012538	small nucleolar RNA R71	snoRNA	NA	NA	NA	NA	NA	NA
5.068196411796826e-06-4	NC_044376.1	51722601	51723199	+	96.7239	598	Intergenic	Intergenic	-42684	TRNAS-AGA_7	TRNAS-AGA_7	TRNAS-AGA_7	#N/A	tRNA	NA	NA	NA	NA	NA	NA
9.183890607299442e-07-3	NC_044376.1	16185801	16186399	+	96.7239	598	Intergenic	Intergenic	-10595	LOC115722868	LOC115722868	XM_030652211	protein TRIGALACTOSYLDIACYLGLYCEROL 1, chloroplastic,	protein_coding	-0.845693762	1	1	-0.07089878	1	1
4.4991697068696995e-08	NC_044370.1	5744801	5746199	+	96.7239	1398	intron	-intron (LOC115706011, intron 1 of 2)	584	LOC115706011	LOC115706011	XR_004009558	uncharacterized LOC115706011	lncRNA	NA	NA	NA	NA	NA	NA
5.207768544062559e-07	NC_044371.1	46803401	46804199	+	96.7239	798	Intergenic	Intergenic	9414	LOC115704999	LOC115704999	XM_030632227	receptor-like protein EIX2	protein_coding	4.793311344	0.005732161	0.038366755	6.232103932	0.000454608	0.005349615
1.3154708548990786e-05-2	NC_044375.1	80936801	80937399	+	96.7239	598	intron	-intron (LOC115720398, intron 1 of 1)	1689	LOC115720398	LOC115720398	XM_030649547	uncharacterized LOC115720398	protein_coding	NA	NA	NA	NA	NA	NA
1.647220148209977e-10	NC_044372.1	25957201	25958399	+	96.7239	1198	Intergenic	Intergenic	-42501	LOC115709117	LOC115709117	XR_004010171	uncharacterized LOC115709117,	lncRNA	NA	NA	NA	NA	NA	NA
2.245140236228973e-09	NC_044374.1	55963401	55964399	+	96.7239	998	Intergenic	Intergenic	-27295	LOC115716233	LOC115716233	XM_030644985	probable mediator of RNA polymerase II transcription subunit 37e	protein_coding	-0.443060218	1	1	0.782706728	1	1
2.3361077759013213e-05-2	NC_044378.1	24817201	24817799	+	96.7239	598	Intergenic	Intergenic	114489	LOC115698279	LOC115698279	XM_030625490	uncharacterized LOC115698279	protein_coding	NA	NA	NA	NA	NA	NA
1.959705379732078e-06	NC_044370.1	46233401	46234199	+	96.7239	798	Intergenic	Intergenic	61685	LOC115720955	LOC115720955	XM_030650172	uncharacterized LOC115720955	protein_coding	-1.549169232	0.892939793	NA	0	1	NA
7.600752179327325e-07	NC_044371.1	43536201	43536799	+	96.7239	598	Intergenic	Intergenic	21862	LOC115708324	LOC115708324	XM_030636565	ATP synthase subunit alpha, chloroplastic	protein_coding	-1.530746015	0.163438258	0.656999922	-0.815220211	1	1
0.00010903118567385318	NC_044371.1	4125801	4126199	+	96.7239	398	Intergenic	Intergenic	-17075	LOC115707157	LOC115707157	XR_004009702	uncharacterized LOC115707157,	lncRNA	NA	NA	NA	NA	NA	NA
5.207768544062559e-07-4	NC_044377.1	25431401	25432199	+	96.7239	798	Intergenic	Intergenic	31719	LOC115695063	LOC115695063	XM_030622159	probable auxin efflux carrier component 1c	protein_coding	0	1	NA	-4.15813309	0.339451176	1
1.0634493606513432e-09	NC_044373.1	85287601	85288799	+	96.7239	1198	intron	-intron (LOC115712826, intron 14 of 16)	-5453	LOC115712450	LOC115712450	XM_030640723	uncharacterized LOC115712450	protein_coding	-0.082691441	1	1	0.062342066	1	1
1.3906901831209784e-07-2	NW_022060428.1	162001	162999	+	96.7239	998	NA	NA	NA	NA			#N/A		NA	NA	NA	NA	NA	NA
5.068196411796826e-06-2	NC_044370.1	90380401	90380999	+	96.7239	598	Intergenic	Intergenic	-5173	LOC115702902	LOC115702902	XM_030630364	mitogen-activated protein kinase kinase kinase 1	protein_coding	4.16475774	0.035579443	0.185250174	-1.404283004	0.675747851	1
1.959705379732078e-06-4	NC_044375.1	82469201	82469799	+	96.7239	598	Intergenic	Intergenic	-9876	LOC115720408	LOC115720408	XM_030649558	uncharacterized LOC115720408	protein_coding	NA	NA	NA	NA	NA	NA
1.341248034962916e-06-2	NW_022060528.1	213801	214399	+	96.7239	598	Intergenic	Intergenic	-30612	LOC115702305	LOC115702305	XM_030629752	#N/A	protein_coding	NA	NA	NA	NA	NA	NA
3.090439730021932e-08	NC_044373.1	28717201	28718199	+	96.7239	998	Intergenic	Intergenic	280691	LOC115714558	LOC115714558	XM_030643293	pentatricopeptide repeat-containing protein At1g28690, mitochondrial	protein_coding	0.626313549	1	1	0.374895641	1	1
5.037681098463287e-05	NC_044374.1	19540801	19541199	+	96.7239	398	Intergenic	Intergenic	-77945	LOC115715760	LOC115715760	XM_030644431	metalloendoproteinase 4-MMP	protein_coding	3.356736761	0.056516985	0.275114206	-0.244475174	1	1
6.131477494008499e-06-3	NC_044378.1	55922401	55922999	+	96.7239	598	Intergenic	Intergenic	12780	LOC115696663	LOC115696663	XM_030623553	uncharacterized LOC115696663	protein_coding	NA	NA	NA	NA	NA	NA
2.830043602467862e-05-2	NC_044378.1	46769601	46770199	+	96.7239	598	Intergenic	Intergenic	-100504	LOC115696610	LOC115696610	XM_030623505	uncharacterized LOC115696610	protein_coding	NA	NA	NA	NA	NA	NA
1.1520289518630915e-07	NC_044371.1	36210001	36210999	+	96.7239	998	Intergenic	Intergenic	14155	LOC115707593	LOC115707593	XM_030635607	amino acid transporter AVT6C	protein_coding	2.613871358	5.32013E-15	2.20057E-13	0.916598245	1	1
5.429178392110917e-08	NC_044372.1	52647801	52648599	+	96.7239	798	Intergenic	Intergenic	-87607	LOC115710761	LOC115710761	XM_030639114	uncharacterized LOC115710761	protein_coding	NA	NA	NA	NA	NA	NA
1.0866682171259584e-05	NC_044372.1	75328401	75328999	+	96.7239	598	Intergenic	Intergenic	46988	LOC115710929	LOC115710929	XM_030639280	E3 ubiquitin-protein ligase MBR1-like	protein_coding	NA	NA	NA	NA	NA	NA
3.090439730021932e-08-2	NC_044378.1	22507001	22508199	+	96.7239	1198	Intergenic	Intergenic	-47842	LOC115696429	LOC115696429	XM_030623331	uncharacterized LOC115696429	protein_coding	NA	NA	NA	NA	NA	NA
5.037681098463287e-05-2	NW_022060388.1	142801	143199	+	96.7239	398	NA	NA	NA	NA			#N/A		NA	NA	NA	NA	NA	NA
1.341248034962916e-06	NW_022060476.1	10201	10799	+	96.7239	598	Intergenic	Intergenic	-721300	LOC115702188	LOC115702188	XM_030629636	#N/A	protein_coding	NA	NA	NA	NA	NA	NA
2.0270859640558413e-07-4	NC_044374.1	53196201	53196999	+	96.7239	798	Intergenic	Intergenic	-80505	LOC115715990	LOC115715990	XM_030644677	eukaryotic translation initiation factor 2D,	protein_coding	-0.322081693	1	1	0.159332061	1	1
2.0270859640558413e-07-5	NC_044375.1	43557001	43557799	+	96.7239	798	Intergenic	Intergenic	-237595	LOC115721317	LOC115721317	XM_030650591	tropomyosin-2-like	protein_coding	1.940454338	0.414144069	1	1.706036753	0.502563852	1
2.0270859640558413e-07-3	NC_044372.1	78919201	78920199	+	96.7239	998	Intergenic	Intergenic	12190	LOC115708913	LOC115708913	XM_030636939	protein cornichon homolog 1,	protein_coding	0.265149461	1	1	-0.135823463	1	1
2.830043602467862e-05	NC_044375.1	44545201	44545599	+	96.7239	398	Intergenic	Intergenic	-164687	LOC115720120	LOC115720120	XM_030649281	uncharacterized LOC115720120	protein_coding	0.469670029	1	1	-0.219661927	1	1
4.474941522812127e-11	NC_044376.1	16600801	16602199	+	96.7239	1398	Intergenic	Intergenic	41110	LOC115722725	LOC115722725	XR_004012841	uncharacterized LOC115722725	lncRNA	-1.549169232	0.892939793	NA	0	1	NA
7.407564220792991e-05-3	NC_044378.1	52211601	52211999	+	96.7239	398	Intergenic	Intergenic	63876	LOC115697642	LOC115697642	XM_030624724	BES1/BZR1 homolog protein 4,	protein_coding	0.486903861	1	1	0.202732967	1	1
2.0270859640558413e-07	NC_044371.1	9236801	9237599	+	96.7239	798	Intergenic	Intergenic	-14208	LOC115704844	LOC115704844	XM_030632055	putative acyl-activating enzyme 19	protein_coding	0.371256741	1	1	-0.069470344	1	1
2.830043602467862e-05-3	NC_044379.1	10736001	10736599	+	96.7239	598	Intergenic	Intergenic	-16278	LOC115700699	LOC115700699	XM_030628329	uncharacterized LOC115700699	protein_coding	-1.56962759	0.006274213	0.041499817	-0.435431163	1	1
6.131477494008499e-06-2	NC_044374.1	4513601	4514399	+	96.7239	798	promoter-TSS	-promoter-TSS (LOC115717033)	-1973	LOC115717033	LOC115717033	XM_030645971	cyclic nucleotide-gated ion channel 1-like	protein_coding	-6.940409231	0.042516499	0.215701941	-0.998314179	1	1
5.040928945854806e-10	NC_044378.1	53114801	53116199	+	96.7239	1398	Intergenic	Intergenic	-47317	LOC115697749	LOC115697749	XR_004007985	uncharacterized LOC115697749	lncRNA	NA	NA	NA	NA	NA	NA
5.719955001323713e-09	NC_044375.1	50100801	50101999	+	96.7239	1198	Intergenic	Intergenic	24065	LOC115718533	LOC115718533	XM_030647334	FRIGIDA-like protein 5	protein_coding	3.094265618	0.027089951	0.146690179	1.215687962	0.794897583	1
1.0866682171259584e-05-2	NC_044378.1	10826401	10826999	+	96.7239	598	Intergenic	Intergenic	-15200	LOC115696962	LOC115696962	XM_030623859	laccase-7	protein_coding	-3.785851241	0.255235091	0.929943924	-5.789036263	0.050423008	0.330985256
9.544015087804437e-08	NC_044374.1	42740801	42741599	+	96.7239	798	Intergenic	Intergenic	39841	LOC115717225	LOC115717225	XM_030646197	#N/A	protein_coding	0.022299284	1	1	0.040720356	1	1
2.706625718315177e-09	NC_044377.1	12869601	12871199	+	96.7239	1598	Intergenic	Intergenic	30308	LOC115724585	LOC115724585	XM_030653901	EIN3-binding F-box protein 1	protein_coding	0.358096859	1	1	0.609979247	1	1
7.407564220792991e-05	NC_044370.1	64648401	64648799	+	96.7239	398	Intergenic	Intergenic	57720	LOC115713286	LOC115713286	XM_030641768	very-long-chain aldehyde decarbonylase CER1	protein_coding	-4.979881775	5.27265E-10	1.20806E-08	-5.51669237	1.78924E-12	6.36606E-11
1.592722221431971e-05	NC_044370.1	75488201	75488799	+	96.7239	598	Intergenic	Intergenic	-6413	LOC115714550	LOC115714550	XM_030643288	thioredoxin-like 4, chloroplastic,	protein_coding	-0.934083832	1	1	-0.365936194	1	1
6.551900511028782e-08	NC_044371.1	46601601	46602599	+	96.7239	998	Intergenic	Intergenic	6766	LOC115703645	LOC115703645	XM_030630884	LRR receptor-like serine/threonine-protein kinase HSL2,	protein_coding	-1.105910598	0.712527422	1	-0.614559892	1	1
7.407564220792991e-05-2	NC_044373.1	421601	421999	+	96.7239	398	Intergenic	Intergenic	-13367	LOC115712192	LOC115712192	XM_030640443	pentatricopeptide repeat-containing protein At3g57430, chloroplastic-like	protein_coding	0.045755384	1	1	-0.035542838	1	1
2.706625718315177e-09-2	NC_044379.1	45057401	45058399	+	96.7239	998	Intergenic	Intergenic	7565	LOC115701591	LOC115701591	XR_004008586	small nucleolar RNA R71	snoRNA	NA	NA	NA	NA	NA	NA
2.0270859640558413e-07-2	NC_044371.1	66248001	66249199	+	96.7239	1198	intron	-intron (LOC115705392, intron 6 of 6)	2430	LOC115705392	LOC115705392	XM_030632726	dnaJ protein homolog	protein_coding	-0.143645043	1	1	0.454981418	1	1
1.592722221431971e-05-2	NC_044374.1	36507601	36508199	+	96.7239	598	Intergenic	Intergenic	26701	LOC115715936	LOC115715936	XR_004011485	uncharacterized LOC115715936	lncRNA	NA	NA	NA	NA	NA	NA
6.131477494008499e-06	NC_044371.1	38044001	38044599	+	96.7239	598	exon	-exon (LOC115704019, exon 1 of 3)	167	LOC115704019	LOC115704019	XM_030631242	protein FAR1-RELATED SEQUENCE 9-like	protein_coding	NA	NA	NA	NA	NA	NA
3.588471167878031e-18	NC_044378.1	47712401	47714599	+	96.0185	2198	Intergenic	Intergenic	-142347	LOC115698399	LOC115698399	XR_004008148	small nucleolar RNA R71	snoRNA	NA	NA	NA	NA	NA	NA
6.943920904166591e-15	NC_044374.1	11176401	11178199	+	95.8416	1798	intron	-intron (LOC115717173, intron 1 of 1)	693	LOC115717173	LOC115717173	XM_030646125	uncharacterized LOC115717173	protein_coding	-0.579096446	1	1	-3.040131686	0.08381238	0.501699222
7.10808704634473e-13	NC_044371.1	24620801	24623199	+	95.6823	2398	Intergenic	Intergenic	-20987	LOC115705426	LOC115705426	XM_030632760	protein LIKE COV 1	protein_coding	0.643049486	1	1	0.367579648	1	1
2.0175519670413447e-32	NC_044372.1	1822401	1826799	+	95.6127	4398	intron	-intron (LOC115709523, intron 4 of 4)	14412	LOC115709013	LOC115709013	XM_030637033	anthocyanin 5-aromatic acyltransferase	protein_coding	-2.40771862	0.001524037	0.011943158	-2.289407264	0.003508716	0.033052528
2.9147027724773495e-11	NC_044375.1	72348001	72349999	+	95.5065	1998	Intergenic	Intergenic	-101977	LOC115718551	LOC115718551	XM_030647352	ankyrin repeat-containing protein ITN1-like,	protein_coding	NA	NA	NA	NA	NA	NA
1.2919579280050624e-10	NC_044379.1	32126401	32128399	+	95.4183	1998	Intergenic	Intergenic	-7731	LOC115698579	LOC115698579	XM_030625681	uncharacterized LOC115698579	protein_coding	-1.331060413	0.775515516	1	-0.270061373	1	1
3.9529592325193737e-10	NC_044377.1	69352801	69353999	+	95.3434	1198	Intergenic	Intergenic	-3790	LOC115695420	LOC115695420	XM_030622485	uncharacterized LOC115695420	protein_coding	NA	NA	NA	NA	NA	NA
6.918342514287792e-10	NC_044373.1	77575801	77576999	+	95.3026	1198	Intergenic	Intergenic	-4815	LOC115714752	LOC115714752	XM_030643509	NADH dehydrogenase [ubiquinone] iron-sulfur protein 4, mitochondrial	protein_coding	-0.268600037	1	1	-0.04095372	1	1
1.772435811266776e-17	NC_044374.1	37738201	37740599	+	95.274	2398	Intergenic	Intergenic	-43346	LOC115717729	LOC115717729	XM_030646709	protein FAR1-RELATED SEQUENCE 5-like	protein_coding	NA	NA	NA	NA	NA	NA
3.7181690618779595e-09	NC_044373.1	1621801	1623399	+	95.1643	1598	Intergenic	Intergenic	15320	LOC115712529	LOC115712529	XM_030640818	zinc finger protein JAGGED,	protein_coding	-2.802588868	0.197461602	0.761445209	-7.588366311	1.20816E-07	2.52967E-06
3.7181690618779595e-09-2	NC_044374.1	77025601	77026599	+	95.1643	998	Intergenic	Intergenic	523942	LOC115718006	LOC115718006	XM_030646974	uncharacterized LOC115718006	protein_coding	0	1	NA	-0.998328082	1	NA
7.86142909423765e-09	NC_044371.1	54205201	54206199	+	95.0938	998	Intergenic	Intergenic	466748	LOC115704139	LOC115704139	XM_030631358	uncharacterized LOC115704139	protein_coding	NA	NA	NA	NA	NA	NA
1.1435013900377787e-08	NC_044376.1	14300601	14301799	+	95.0561	1198	Intergenic	Intergenic	-30971	LOC115723593	LOC115723593	XM_030653080	uncharacterized LOC115723593	protein_coding	NA	NA	NA	NA	NA	NA
1.3792515262590698e-08	NC_044377.1	70813201	70814399	+	95.0366	1198	promoter-TSS	-promoter-TSS (LOC115696070)	-967	LOC115696070	LOC115696070	XR_004007668	small nucleolar RNA R71	snoRNA	NA	NA	NA	NA	NA	NA
1.6637081804055748e-08	NC_044377.1	60225401	60226399	+	95.0166	998	Intergenic	Intergenic	-54597	LOC115725132	LOC115725132	XM_030654565	protein disulfide-isomerase 5-4	protein_coding	0.263060716	1	1	0.347689341	1	1
2.006958286216821e-08	NC_044377.1	39513001	39513999	+	94.9961	998	Intergenic	Intergenic	70687	LOC115695169	LOC115695169	XM_030622260	uncharacterized LOC115695169	protein_coding	NA	NA	NA	NA	NA	NA
7.843841128871115e-15	NC_044378.1	24809401	24811399	+	94.9857	1998	Intergenic	Intergenic	121589	LOC115698279	LOC115698279	XM_030625490	uncharacterized LOC115698279	protein_coding	NA	NA	NA	NA	NA	NA
2.4211834066500754e-08	NC_044370.1	104000601	104001599	+	94.9752	998	Intergenic	Intergenic	-11910	LOC115702086	LOC115702086	XM_030629532	zinc finger CCCH domain-containing protein 15,	protein_coding	-0.305604529	1	1	-0.33177898	1	1
6.193276093273507e-08-2	NC_044378.1	49320201	49320799	+	94.8624	598	Intergenic	Intergenic	-23018	LOC115696625	LOC115696625	XM_030623519	uncharacterized LOC115696625	protein_coding	NA	NA	NA	NA	NA	NA
6.193276093273507e-08	NC_044372.1	2988401	2988999	+	94.8624	598	Intergenic	Intergenic	-26614	LOC115709590	LOC115709590	XM_030637722	probable LRR receptor-like serine/threonine-protein kinase At1g56140	protein_coding	-1.331728865	NA	NA	0.69264722	NA	NA
1.0890296819421593e-07	NC_044379.1	61712601	61713399	+	94.7874	798	Intergenic	Intergenic	-7789	LOC115699285	LOC115699285	XR_004008332	uncharacterized LOC115699285	lncRNA	NA	NA	NA	NA	NA	NA
1.5871798422273658e-07	NC_044378.1	55614601	55615599	+	94.734	998	Intergenic	Intergenic	-18337	LOC115697155	LOC115697155	XR_004007906	uncharacterized LOC115697155	lncRNA	-3.030794251	0.400887827	NA	-1.861396181	0.729719023	NA
1.9163470454520823e-07	NC_044373.1	49444801	49445599	+	94.7062	798	Intergenic	Intergenic	-51275	LOC115715108	LOC115715108	XM_030643918	NDR1/HIN1-like protein 13	protein_coding	0.833835692	1	1	-1.719989039	0.418439101	1
1.9163470454520823e-07-2	NC_044373.1	58733001	58733599	+	94.7062	598	Intergenic	Intergenic	14047	LOC115712264	LOC115712264	XM_030640520	shikimate O-hydroxycinnamoyltransferase	protein_coding	-3.480102654	0.234687583	0.872779922	-4.339753965	0.096545559	0.565509925
2.313982274445263e-07-2	NC_044375.1	26677601	26678599	+	94.6775	998	Intergenic	Intergenic	-23023	LOC115719182	LOC115719182	XM_030648128	RNA-binding protein 42	protein_coding	-0.637351972	1	1	-0.086340319	1	1
2.313982274445263e-07	NC_044374.1	41970001	41970999	+	94.6775	998	Intergenic	Intergenic	23103	LOC115717767	LOC115717767	XM_030646742	uncharacterized LOC115717767	protein_coding	NA	NA	NA	NA	NA	NA
2.7943755050898874e-07-2	NC_044375.1	17597001	17597799	+	94.6481	798	Intergenic	Intergenic	45744	LOC115719925	LOC115719925	XM_030649097	uncharacterized LOC115719925	protein_coding	NA	NA	NA	NA	NA	NA
2.7943755050898874e-07	NC_044374.1	29801601	29802399	+	94.6481	798	Intergenic	Intergenic	-31261	LOC115715598	LOC115715598	XM_030644242	COBW domain-containing protein 1	protein_coding	1.101805426	0.734413413	1	0.976105201	1	1
3.374810915118282e-07	NC_044370.1	44385001	44385599	+	94.6178	598	Intergenic	Intergenic	43351	LOC115711182	LOC115711182	XM_030639513	cyclin-D3-3	protein_coding	1.446470232	0.288228518	1	0.147377047	1	1
4.0761971495440926e-07	NC_044373.1	30135801	30136599	+	94.5866	798	Intergenic	Intergenic	21737	LOC115713320	LOC115713320	XM_030641799	uncharacterized LOC115713320	protein_coding	2.100485183	0.516898665	1	-0.050221201	1	1
2.44193080387617e-12	NC_044373.1	39463801	39465199	+	94.5866	1398	Intergenic	Intergenic	-2352	LOC115713409	LOC115713409	XM_030641892	uncharacterized mitochondrial protein AtMg00810-like	protein_coding	NA	NA	NA	NA	NA	NA
4.0761971495440926e-07-2	NC_044379.1	26082601	26083399	+	94.5866	798	Intergenic	Intergenic	-24816	LOC115698849	LOC115698849	XM_030626050	probable L-type lectin-domain containing receptor kinase S.5	protein_coding	0.754067762	NA	NA	2.638750921	NA	NA
4.923830973449634e-07	NC_044375.1	73727601	73728399	+	94.5544	798	Intergenic	Intergenic	46939	LOC115719632	LOC115719632	XM_030648744	tropinone reductase homolog At5g06060,	protein_coding	-0.892507169	1	1	0.154584617	1	1
2.9764933838547427e-22	NC_044372.1	90838401	90841199	+	94.5462	2798	Intergenic	Intergenic	-7141	LOC115709111	LOC115709111	XM_030637145	peroxidase 3-like	protein_coding	0	1	NA	-4.182480662	0.313960351	1
5.948322724006654e-07	NC_044377.1	32271801	32272599	+	94.5213	798	Intergenic	Intergenic	9631	LOC115696076	LOC115696076	XR_004007674	small nucleolar RNA R71	snoRNA	NA	NA	NA	NA	NA	NA
5.948322724006654e-07-2	NC_044378.1	65362601	65363399	+	94.5213	798	Intergenic	Intergenic	-5863	LOC115698244	LOC115698244	XM_030625444	alkylated DNA repair protein ALKBH8 homolog	protein_coding	0.031357599	1	1	-0.570692242	1	1
7.18671807237751e-07	NC_044370.1	65197001	65197799	+	94.4872	798	Intergenic	Intergenic	-16142	LOC115703303	LOC115703303	XR_004009078	small nucleolar RNA R71	snoRNA	NA	NA	NA	NA	NA	NA
7.18671807237751e-07-2	NC_044373.1	59214401	59215199	+	94.4872	798	Intergenic	Intergenic	34154	LOC115712271	LOC115712271	XR_004010820	uncharacterized LOC115712271	lncRNA	0	1	NA	-2.503385706	0.7065612	NA
8.955313118451612e-12	NC_044374.1	76949601	76950999	+	94.4697	1398	Intergenic	Intergenic	599742	LOC115718006	LOC115718006	XM_030646974	uncharacterized LOC115718006	protein_coding	0	1	NA	-0.998328082	1	NA
1.0783280661565926e-11	NC_044373.1	75966201	75968399	+	94.4519	2198	Intergenic	Intergenic	15712	LOC115712699	LOC115712699	XM_030641029	probable LRR receptor-like serine/threonine-protein kinase At5g10290,	protein_coding	-0.162266804	1	1	0.409694336	1	1
8.683858026370834e-07	NW_022060437.1	11601	12399	+	94.4519	798	Intergenic	Intergenic	-15221	LOC115702099	LOC115702099	XM_030629546	#N/A	protein_coding	-0.281256377	1	1	1.431771817	0.048051706	0.319181303
1.0783280661565926e-11-2	NC_044377.1	11421001	11422399	+	94.4519	1398	Intergenic	Intergenic	82384	LOC115724749	LOC115724749	XM_030654086	uncharacterized LOC115724749,	protein_coding	1.781315763	0.040942711	0.208930645	0.584900594	1	1
1.0494028136045804e-06	NC_044377.1	58937401	58938399	+	94.4156	998	Intergenic	Intergenic	-45334	LOC115694820	LOC115694820	XM_030621911	30S ribosomal protein 2, chloroplastic	protein_coding	-2.028696769	0.000401868	0.003623409	-1.189388943	0.514902289	1
1.0494028136045804e-06-2	NC_044378.1	49777001	49777799	+	94.4156	798	Intergenic	Intergenic	-11482	LOC115697491	LOC115697491	XM_030624518	AMP deaminase	protein_coding	-0.455710732	1	1	-0.278426196	1	1
2.2675758414642742e-11	NC_044374.1	77052201	77053599	+	94.378	1398	Intergenic	Intergenic	497142	LOC115718006	LOC115718006	XM_030646974	uncharacterized LOC115718006	protein_coding	0	1	NA	-0.998328082	1	NA
1.268295886092829e-06	NC_044374.1	3578001	3578799	+	94.378	798	Intergenic	Intergenic	-8610	LOC115718327	LOC115718327	XR_004011906	small nucleolar RNA R71	snoRNA	NA	NA	NA	NA	NA	NA
1.268295886092829e-06-2	NC_044375.1	44099801	44100599	+	94.378	798	Intergenic	Intergenic	21479	LOC115720935	LOC115720935	XM_030650147	LOB domain-containing protein 12	protein_coding	-3.487852881	0.388397124	NA	-2.432708214	0.623781174	1
1.5330252452073456e-06-2	NC_044377.1	29871801	29872799	+	94.3393	998	Intergenic	Intergenic	-13619	LOC115695622	LOC115695622	XM_030622677	uncharacterized LOC115695622	protein_coding	-0.172512157	1	1	-0.321111595	1	1
1.5330252452073456e-06-3	NC_044377.1	72757801	72758599	+	94.3393	798	Intergenic	Intergenic	19405	LOC115725653	LOC115725653	XM_030655238	protein BASIC PENTACYSTEINE4,	protein_coding	0.992323127	1	1	0.086360665	1	1
1.5330252452073456e-06	NC_044373.1	30006601	30007199	+	94.3393	598	Intergenic	Intergenic	7165	LOC115713318	LOC115713318	XM_030641798	uncharacterized LOC115713318	protein_coding	NA	NA	NA	NA	NA	NA
4.2849341996092986e-119	NC_044379.1	3550801	3568599	+	94.3117	17798	TTS	-TTS (LOC115701760)	-2504	LOC115701759	LOC115701759	XR_004008745	18S ribosomal RNA	rRNA	0.402061107	1	1	-0.354996675	1	1
1.8532328024770433e-06	NC_044377.1	28372601	28373199	+	94.2992	598	Intergenic	Intergenic	137506	LOC115695075	LOC115695075	XM_030622169	uncharacterized LOC115695075	protein_coding	NA	NA	NA	NA	NA	NA
2.2405996397185637e-06-2	NW_022060526.1	35201	35999	+	94.2577	798	NA	NA	NA	NA			#N/A		NA	NA	NA	NA	NA	NA
2.2405996397185637e-06	NC_044372.1	61523801	61524599	+	94.2577	798	Intergenic	Intergenic	34734	LOC115711782	LOC115711782	XR_004010657	small nucleolar RNA R71	snoRNA	NA	NA	NA	NA	NA	NA
2.7092800541820883e-06-2	NC_044374.1	85423201	85423799	+	94.2148	598	Intergenic	Intergenic	-153796	LOC115716182	LOC115716182	XM_030644921	uncharacterized LOC115716182	protein_coding	2.148277376	0.003082854	0.022120827	0.135857219	1	1
2.7092800541820883e-06	NC_044374.1	22413201	22413799	+	94.2148	598	Intergenic	Intergenic	-13821	LOC115716047	LOC115716047	XM_030644744	#N/A	protein_coding	-0.545974749	1	1	0.022136168	1	1
1.0042791939241658e-10	NC_044374.1	8990801	8991999	+	94.2148	1198	Intergenic	Intergenic	-4488	LOC115717540	LOC115717540	XM_030646526	uncharacterized LOC115717540	protein_coding	NA	NA	NA	NA	NA	NA
3.27642871154575e-06-4	NC_044376.1	8390201	8390999	+	94.1704	798	Intergenic	Intergenic	1713	LOC115723527	LOC115723527	XM_030653021	uncharacterized LOC115723527	protein_coding	NA	NA	NA	NA	NA	NA
3.27642871154575e-06-7	NC_044379.1	3658601	3659599	+	94.1704	998	Intergenic	Intergenic	-42213	LOC115699501	LOC115699501	XM_030626950	protein TPR3,	protein_coding	0.366502746	1	1	-0.220858208	1	1
3.27642871154575e-06	NC_044370.1	3912401	3913199	+	94.1704	798	Intergenic	Intergenic	-4891	LOC115702989	LOC115702989	XM_030630461	protein TIC 21, chloroplastic	protein_coding	-0.862697644	1	1	0.048274987	1	1
3.27642871154575e-06-6	NC_044377.1	69146001	69146799	+	94.1704	798	Intergenic	Intergenic	6311	LOC115695788	LOC115695788	XM_030622865	probable DNA helicase MCM9	protein_coding	0.374389611	1	1	-3.515227277	0.255214338	1
3.27642871154575e-06-2	NC_044372.1	5625801	5626399	+	94.1704	598	Intergenic	Intergenic	10412	LOC115711684	LOC115711684	XM_030640062	pentatricopeptide repeat-containing protein At4g31850, chloroplastic,	protein_coding	-0.340830023	1	1	0.430070572	1	1
3.27642871154575e-06-5	NC_044377.1	39910801	39911799	+	94.1704	998	Intergenic	Intergenic	3179	LOC115725240	LOC115725240	XR_004013361	uncharacterized LOC115725240	lncRNA	-2.926242361	0.19714863	0.760543471	-1.614504334	0.689949027	1
3.27642871154575e-06-3	NC_044375.1	58098401	58099199	+	94.1704	798	Intergenic	Intergenic	30074	LOC115720219	LOC115720219	XM_030649376	uncharacterized LOC115720219	protein_coding	NA	NA	NA	NA	NA	NA
3.962841069634627e-06-2	NC_044377.1	24638401	24638999	+	94.1244	598	Intergenic	Intergenic	230552	LOC115695060	LOC115695060	XM_030622157	uncharacterized LOC115695060	protein_coding	NA	NA	NA	NA	NA	NA
3.962841069634627e-06	NC_044372.1	56941801	56942399	+	94.1244	598	Intergenic	Intergenic	-38772	LOC115709369	LOC115709369	XM_030637455	uncharacterized LOC115709369	protein_coding	0.098028846	1	1	0.337712413	1	1
4.793731653456252e-06	NC_044372.1	85145801	85146599	+	94.0767	798	Intergenic	Intergenic	-6472	LOC115708783	LOC115708783	XM_030636793	disease resistance protein RGA2-like	protein_coding	3.405298884	0.200459339	0.770685974	6.433776912	0.008317795	0.070811224
5.7996801620432795e-06	NC_044372.1	45440201	45440799	+	94.0272	598	Intergenic	Intergenic	-133473	LOC115710724	LOC115710724	XM_030639078	uncharacterized LOC115710724	protein_coding	NA	NA	NA	NA	NA	NA
5.7996801620432795e-06-2	NC_044374.1	11005801	11006399	+	94.0272	598	Intergenic	Intergenic	-70100	LOC115717559	LOC115717559	XM_030646544	uncharacterized LOC115717559	protein_coding	0	1	NA	-0.998328082	1	NA
7.017781992062095e-06-3	NC_044374.1	75504001	75504399	+	93.9759	398	Intergenic	Intergenic	-3076	LOC115717999	LOC115717999	XM_030646968	isoflavone reductase homolog	protein_coding	2.046768217	0.038861798	0.199743408	-0.870385168	1	1
7.017781992062095e-06	NC_044372.1	26345201	26345799	+	93.9759	598	Intergenic	Intergenic	-60357	LOC115710576	LOC115710576	XM_030638936	uncharacterized LOC115710576	protein_coding	NA	NA	NA	NA	NA	NA
7.017781992062095e-06-4	NC_044379.1	47836401	47836999	+	93.9759	598	Intergenic	Intergenic	-9411	LOC115698659	LOC115698659	XM_030625790	protein ANTHESIS POMOTING FACTOR 1,	protein_coding	-0.001559383	1	1	0.545787315	1	1
7.017781992062095e-06-2	NC_044373.1	36513401	36513999	+	93.9759	598	Intergenic	Intergenic	-22185	LOC115713369	LOC115713369	XM_030641850	uncharacterized LOC115713369	protein_coding	NA	NA	NA	NA	NA	NA
9.401858990576314e-10	NC_044377.1	36164201	36165199	+	93.9225	998	Intergenic	Intergenic	-2721	LOC115725528	LOC115725528	XM_030655083	myosin-2	protein_coding	-2.364276779	1.6485E-19	9.96512E-18	-0.728568035	1	1
8.49304784616137e-06	NC_044373.1	66222201	66222999	+	93.9225	798	Intergenic	Intergenic	38999	LOC115713585	LOC115713585	XM_030642073	uncharacterized LOC115713585	protein_coding	NA	NA	NA	NA	NA	NA
8.49304784616137e-06-3	NW_022060526.1	5401	6399	+	93.9225	998	NA	NA	NA	NA			#N/A		NA	NA	NA	NA	NA	NA
8.49304784616137e-06-2	NC_044375.1	25285201	25285799	+	93.9225	598	Intergenic	Intergenic	-17647	LOC115719972	LOC115719972	XM_030649141	transcription factor MYB87-like	protein_coding	0	1	NA	-1.850786648	0.833284852	NA
1.1733862027834277e-13	NC_044370.1	74506601	74508199	+	93.9225	1598	Intergenic	Intergenic	-11908	LOC115714431	LOC115714431	XM_030643149	cytochrome P450 81Q32,	protein_coding	-3.429987273	0.190808323	0.743093272	-5.145005009	0.017327673	0.133877066
1.1331251947031815e-09	NC_044375.1	82506001	82507199	+	93.895	1198	Intergenic	Intergenic	-16277	LOC115719669	LOC115719669	XM_030648791	uncharacterized LOC115719669	protein_coding	0.382735256	1	1	0.410109608	1	1
1.0280106993412636e-05	NC_044378.1	8971401	8972399	+	93.867	998	Intergenic	Intergenic	-46983	LOC115697129	LOC115697129	XM_030624044	auxin transporter-like protein 2	protein_coding	0.137475861	1	1	2.294420627	0.000700552	0.007939319
1.0280106993412636e-05-2	NC_044379.1	23719801	23720399	+	93.867	598	Intergenic	Intergenic	-57812	LOC115698895	LOC115698895	XM_030626097	protein FAR1-RELATED SEQUENCE 5-like	protein_coding	0	1	1	-5.935062273	0.026108919	0.190058995
1.6461358702531763e-09	NC_044375.1	77859001	77860399	+	93.8385	1398	Intergenic	Intergenic	10205	LOC115720374	LOC115720374	XM_030649526	sporozoite surface protein 2-like	protein_coding	NA	NA	NA	NA	NA	NA
1.24452808820076e-05	NC_044372.1	32424601	32425199	+	93.8093	598	Intergenic	Intergenic	-29335	LOC115709312	LOC115709312	XM_030637387	isocitrate dehydrogenase [NAD] catalytic subunit 5, mitochondrial,	protein_coding	-0.51969651	1	1	0.129961164	1	1
1.5069108686075989e-05	NC_044376.1	30780201	30780999	+	93.7492	798	Intergenic	Intergenic	50894	LOC115723755	LOC115723755	XM_030653232	uncharacterized LOC115723755	protein_coding	NA	NA	NA	NA	NA	NA
1.5069108686075989e-05-2	NC_044379.1	38583201	38583799	+	93.7492	598	Intergenic	Intergenic	-21459	LOC115699355	LOC115699355	XM_030626712	protein PHYLLO, chloroplastic,	protein_coding	-0.181116052	1	1	0.030561853	1	1
1.8249424637060768e-05	NC_044372.1	46252001	46252599	+	93.6866	598	Intergenic	Intergenic	16947	LOC115711379	LOC115711379	XM_030639712	AT-hook motif nuclear-localized protein 7	protein_coding	0.796699547	1	1	-0.570623972	1	1
5.052817646089453e-09	NC_044375.1	88847201	88849199	+	93.6543	1998	Intergenic	Intergenic	-11764	LOC115720466	LOC115720466	XM_030649613	uncharacterized LOC115720466	protein_coding	NA	NA	NA	NA	NA	NA
2.2105109436196842e-05	NC_044376.1	52752001	52752599	+	93.6212	598	Intergenic	Intergenic	14564	LOC115724380	LOC115724380	XR_004013173	small nucleolar RNA R71	snoRNA	NA	NA	NA	NA	NA	NA
2.736949170626653e-12	NW_022060514.1	10001	11599	+	93.5761	1598	NA	NA	NA	NA			#N/A		NA	NA	NA	NA	NA	NA
2.678066564965796e-05-3	NC_044376.1	34979401	34979999	+	93.5531	598	promoter-TSS	-promoter-TSS (LOC115724370)	-1688	LOC115724370	LOC115724370	XR_004013163	small nucleolar RNA R71	snoRNA	NA	NA	NA	NA	NA	NA
2.678066564965796e-05-2	NC_044375.1	38873401	38873999	+	93.5531	598	Intergenic	Intergenic	3378	LOC115720069	LOC115720069	XM_030649232	uncharacterized LOC115720069	protein_coding	NA	NA	NA	NA	NA	NA
2.678066564965796e-05	NC_044374.1	33490401	33490999	+	93.5531	598	Intergenic	Intergenic	-36475	LOC115716668	LOC115716668	XM_030645518	chaperone protein dnaJ GFA2, mitochondrial	protein_coding	-0.120464696	1	1	0.538581738	1	1
3.9662584079422316e-12	NC_044373.1	40280401	40282599	+	93.5296	2198	Intergenic	Intergenic	-8942	LOC115712708	LOC115712708	XM_030641044	uncharacterized LOC115712708	protein_coding	-1.07787383	0.689760759	1	-0.145258183	1	1
1.0683205120156269e-08	NC_044371.1	61358201	61359399	+	93.5178	1198	Intergenic	Intergenic	-10001	LOC115708260	LOC115708260	XM_030636483	40S ribosomal protein S27-2-like	protein_coding	0.986471771	1	1	0.952146443	1	1
1.288412831259666e-08-2	NC_044375.1	49854201	49854799	+	93.4818	598	Intergenic	Intergenic	-8555	LOC115718472	LOC115718472	XM_030647257	histidine-containing phosphotransfer protein 1	protein_coding	0.769951322	1	1	0.357995139	1	1
3.2451800971994966e-05	NC_044374.1	34334801	34335199	+	93.4818	398	Intergenic	Intergenic	49977	LOC115715845	LOC115715845	XM_030644516	uncharacterized LOC115715845	protein_coding	-0.187210151	1	1	-0.427999347	1	1
1.288412831259666e-08	NC_044373.1	40263401	40264399	+	93.4818	998	Intergenic	Intergenic	-3894	LOC115712709	LOC115712709	XM_030641045	translocator protein homolog	protein_coding	-0.197179772	1	1	-1.199843631	0.587665151	1
3.2451800971994966e-05-2	NC_044375.1	2756601	2757199	+	93.4818	598	Intergenic	Intergenic	22599	LOC115721276	LOC115721276	XR_004012421	uncharacterized LOC115721276	lncRNA	NA	NA	NA	NA	NA	NA
1.5539397902574908e-08	NC_044379.1	30168001	30169799	+	93.4449	1798	Intergenic	Intergenic	2115	LOC115701605	LOC115701605	XR_004008598	small nucleolar RNA R71	snoRNA	NA	NA	NA	NA	NA	NA
3.9332245125868946e-05	NC_044371.1	25424001	25424399	+	93.4073	398	Intergenic	Intergenic	-7028	LOC115705830	LOC115705830	XM_030633276	WD-40 repeat-containing protein MSI4	protein_coding	0.145374622	1	1	0.254919104	1	1
3.9332245125868946e-05-2	NC_044374.1	2212401	2212999	+	93.4073	598	Intergenic	Intergenic	-10447	LOC115716583	LOC115716583	XM_030645412	uncharacterized LOC115716583	protein_coding	4.342842375	0.060609652	0.291785459	-0.594362877	1	1
1.7510564086676352e-11	NC_044379.1	3614001	3615599	+	93.3292	1598	Intergenic	Intergenic	50202	LOC115701762	LOC115701762	XR_004008747	28S ribosomal RNA	rRNA	0.186933101	1	1	-1.187118883	0.756031517	1
1.7510564086676352e-11-2	NW_022060454.1	340001	341399	+	93.3292	1398	Intergenic	Intergenic	-163458	LOC115702127	LOC115702127	XM_030629586	#N/A	protein_coding	-1.214863418	0.74862229	1	-0.136444746	1	1
4.76820778429659e-05	NC_044374.1	77479401	77479999	+	93.3292	598	Intergenic	Intergenic	70342	LOC115718006	LOC115718006	XM_030646974	uncharacterized LOC115718006	protein_coding	0	1	NA	-0.998328082	1	NA
3.2901763321686794e-08	NC_044375.1	91723401	91724799	+	93.2888	1398	Intergenic	Intergenic	-7927	LOC115721454	LOC115721454	XR_004012476	small nucleolar RNA R71	snoRNA	NA	NA	NA	NA	NA	NA
3.2901763321686794e-08-2	NC_044378.1	44436401	44437399	+	93.2888	998	Intergenic	Intergenic	-22884	LOC115697164	LOC115697164	XM_030624074	probable LRR receptor-like serine/threonine-protein kinase At1g56140,	protein_coding	-1.5824189	0.003544764	0.025079496	-0.464682655	1	1
1.4305919301009297e-17	NW_022060514.1	44801	46999	+	93.2806	2198	NA	NA	NA	NA			#N/A		NA	NA	NA	NA	NA	NA
3.969498293004492e-08	NC_044374.1	85055001	85055799	+	93.2474	798	Intergenic	Intergenic	-3434	LOC115717422	LOC115717422	XM_030646406	uncharacterized LOC115717422	protein_coding	0.901325619	1	1	0.325334517	1	1
3.681772074669438e-11	NC_044378.1	59668201	59669599	+	93.2192	1398	Intergenic	Intergenic	58729	LOC115697359	LOC115697359	XM_030624333	serine/threonine-protein kinase 38-like,	protein_coding	-0.15788432	1	1	0.115718511	1	1
4.789403865236916e-08	NC_044370.1	103300401	103301399	+	93.205	998	Intergenic	Intergenic	-3452	LOC115696782	LOC115696782	XM_030623668	glycine-rich RNA-binding, abscisic acid-inducible protein	protein_coding	-2.478862622	0.552923451	1	-4.607807834	0.118925254	0.671948212
4.789403865236916e-08-4	NC_044375.1	87132001	87133199	+	93.205	1198	Intergenic	Intergenic	-9095	LOC115719389	LOC115719389	XM_030648420	DEAD-box ATP-dependent RNA helicase 52A,	protein_coding	-0.515357086	1	1	-0.007276749	1	1
4.789403865236916e-08-2	NC_044372.1	34702401	34703199	+	93.205	798	Intergenic	Intergenic	28410	LOC115708691	LOC115708691	XR_004010062	uncharacterized LOC115708691,	lncRNA	0.060719908	1	1	1.186069133	0.530234162	1
4.789403865236916e-08-3	NC_044374.1	67661601	67662599	+	93.205	998	Intergenic	Intergenic	-28751	LOC115717080	LOC115717080	XM_030646018	protein NUCLEAR FUSION DEFECTIVE 4	protein_coding	-3.886588945	1.61657E-86	1.82796E-83	-1.56509108	0.000153177	0.001952237
5.779062553540079e-08	NC_044371.1	63001001	63001999	+	93.1615	998	Intergenic	Intergenic	21161	LOC115704206	LOC115704206	XM_030631423	putative disease resistance RPP13-like protein 1	protein_coding	2.749223927	0.372157751	1	-2.31701248	0.407787291	1
5.779062553540079e-08-2	NC_044372.1	31912001	31912999	+	93.1615	998	Intergenic	Intergenic	57352	LOC115710619	LOC115710619	XM_030638976	uncharacterized LOC115710619	protein_coding	NA	NA	NA	NA	NA	NA
6.97371426116253e-08	NC_044374.1	8068201	8069199	+	93.117	998	Intergenic	Intergenic	12855	LOC115717000	LOC115717000	XM_030645923	glutaminyl-peptide cyclotransferase,	protein_coding	0.139793367	1	1	-0.004658526	1	1
8.507416864195369e-05	NC_044375.1	43653801	43654199	+	93.0714	398	Intergenic	Intergenic	-140995	LOC115721317	LOC115721317	XM_030650591	tropomyosin-2-like	protein_coding	1.940454338	0.414144069	1	1.706036753	0.502563852	1
8.41593691188254e-08	NC_044372.1	60392401	60393599	+	93.0714	1198	Intergenic	Intergenic	32634	LOC115711714	LOC115711714	XR_004010594	small nucleolar RNA R71	snoRNA	NA	NA	NA	NA	NA	NA
1.015717982467875e-07	NC_044375.1	63267401	63268399	+	93.0245	998	Intergenic	Intergenic	-10662	LOC115718848	LOC115718848	XR_004012063	uncharacterized LOC115718848	lncRNA	-4.830802872	5.38209E-06	6.82904E-05	-2.288811809	0.143495988	0.783756241
1.225961881213384e-07	NC_044375.1	67563001	67563999	+	92.9765	998	Intergenic	Intergenic	8307	LOC115719535	LOC115719535	XM_030648617	protein METHYLENE BLUE SENSITIVITY 1	protein_coding	0.283917938	1	1	0.164121862	1	1
0.00010323713861921547	NC_044373.1	64562401	64562799	+	92.9765	398	Intergenic	Intergenic	-56081	LOC115713570	LOC115713570	XM_030642057	uncharacterized LOC115713570	protein_coding	NA	NA	NA	NA	NA	NA
0.00010323713861921547-3	NW_022060454.1	478801	479199	+	92.9765	398	Intergenic	Intergenic	-25158	LOC115702127	LOC115702127	XM_030629586	#N/A	protein_coding	-1.214863418	0.74862229	1	-0.136444746	1	1
0.00010323713861921547-2	NC_044375.1	30802601	30802999	+	92.9765	398	Intergenic	Intergenic	-4708	LOC115721638	LOC115721638	XR_004012645	U1 spliceosomal RNA	snRNA	0.703487398	1	1	-1.131534495	0.824660186	1
1.47984008256561e-07-2	NC_044377.1	22975801	22976799	+	92.9272	998	Intergenic	Intergenic	-40361	LOC115695057	LOC115695057	XM_030622155	uncharacterized LOC115695057	protein_coding	-1.549169232	0.892939793	NA	0	1	NA
1.47984008256561e-07-3	NC_044379.1	23391601	23392599	+	92.9272	998	Intergenic	Intergenic	-118691	LOC115699941	LOC115699941	XM_030627488	uncharacterized LOC115699941	protein_coding	-3.345667883	0.000130004	0.001282228	-1.898504235	0.153809325	0.827393904
1.47984008256561e-07	NC_044373.1	39718001	39718999	+	92.9272	998	Intergenic	Intergenic	-6767	LOC115715451	LOC115715451	XR_004011322	small nucleolar RNA R71	snoRNA	NA	NA	NA	NA	NA	NA
2.1567307183457221e-07	NC_044374.1	33543401	33544399	+	92.8245	998	Intergenic	Intergenic	-9491	LOC115716862	LOC115716862	XM_030645766	TVP38/TMEM64 family membrane protein slr0305	protein_coding	-2.016451566	2.99452E-05	0.000335452	-0.70843417	1	1
1.4350260556508551e-15	NC_044373.1	60280801	60282999	+	92.814	2198	Intergenic	Intergenic	21774	LOC115715050	LOC115715050	XR_004011166	uncharacterized LOC115715050	lncRNA	NA	NA	NA	NA	NA	NA
2.604000645695043e-07-2	NC_044375.1	34555001	34555799	+	92.7711	798	Intergenic	Intergenic	8599	LOC115721279	LOC115721279	XR_004012422	uncharacterized LOC115721279	lncRNA	0	1	NA	-2.881130672	0.635916083	NA
2.604000645695043e-07	NC_044371.1	67863001	67863799	+	92.7711	798	Intergenic	Intergenic	4565	LOC115704276	LOC115704276	XM_030631491	uncharacterized LOC115704276	protein_coding	NA	NA	NA	NA	NA	NA
0.00015215343764443204	NC_044379.1	21591201	21591599	+	92.7711	398	Intergenic	Intergenic	17687	LOC115700995	LOC115700995	XR_004008478	uncharacterized LOC115700995	lncRNA	0	1	NA	-0.998328082	1	NA
3.144299736571557e-07-2	NC_044378.1	12527601	12528399	+	92.7162	798	Intergenic	Intergenic	28899	LOC115696222	LOC115696222	XR_004007767	uncharacterized LOC115696222	lncRNA	-2.029120226	0.727726729	NA	-0.036557106	1	NA
3.144299736571557e-07	NC_044372.1	56791801	56792999	+	92.7162	1198	Intergenic	Intergenic	20019	LOC115710003	LOC115710003	XM_030638291	uncharacterized LOC115710003	protein_coding	0.067437259	1	1	-1.44349239	0.145060636	0.791606252
4.341891324108419e-15	NC_044373.1	40260001	40261999	+	92.6825	1998	Intergenic	Intergenic	-6794	LOC115712709	LOC115712709	XM_030641045	translocator protein homolog	protein_coding	-0.197179772	1	1	-1.199843631	0.587665151	1
8.71673103288377e-10	NC_044375.1	54189401	54190799	+	92.6597	1398	Intergenic	Intergenic	-169362	LOC115720200	LOC115720200	XM_030649356	uncharacterized LOC115720200	protein_coding	NA	NA	NA	NA	NA	NA
3.797042840899456e-07-3	NW_022060368.1	234601	235599	+	92.6597	998	Intergenic	Intergenic	11024	LOC115702022	LOC115702022	XM_030629482	#N/A	protein_coding	0.474538444	1	1	-0.253685084	1	1
2.103335300320127e-12	NC_044376.1	32013001	32014399	+	92.6597	1398	Intergenic	Intergenic	6863	LOC115723346	LOC115723346	XM_030652789	protein SIEVE ELEMENT OCCLUSION B	protein_coding	1.756147571	0.113116892	0.488610357	-6.463194633	1.47977E-45	4.92588E-43
3.797042840899456e-07	NC_044371.1	51677601	51678999	+	92.6597	1398	Intergenic	Intergenic	186003	LOC115705418	LOC115705418	XR_004009460	uncharacterized LOC115705418	lncRNA	NA	NA	NA	NA	NA	NA
3.797042840899456e-07-2	NC_044373.1	59532201	59532999	+	92.6597	798	Intergenic	Intergenic	-159188	LOC115713544	LOC115713544	XM_030642028	uncharacterized LOC115713544	protein_coding	0	1	NA	-0.998328082	1	NA
4.5857124763931874e-07-2	NC_044374.1	12048001	12048999	+	92.6017	998	TTS	-TTS (LOC115717563)	1761	LOC115717563	LOC115717563	XM_030646548	uncharacterized LOC115717563	protein_coding	NA	NA	NA	NA	NA	NA
4.5857124763931874e-07	NC_044373.1	63555401	63556199	+	92.6017	798	Intergenic	Intergenic	-53732	LOC115712143	LOC115712143	XR_004010795	uncharacterized LOC115712143	lncRNA	NA	NA	NA	NA	NA	NA
4.5857124763931874e-07-3	NC_044377.1	26075401	26076199	+	92.6017	798	Intergenic	Intergenic	23124	LOC115724977	LOC115724977	XM_030654366	T-complex protein 1 subunit alpha	protein_coding	0.349019721	1	1	0.740588901	1	1
5.538714953134096e-07	NC_044372.1	69014401	69015199	+	92.5419	798	Intergenic	Intergenic	33388	LOC115710886	LOC115710886	XM_030639238	uncharacterized LOC115710886	protein_coding	NA	NA	NA	NA	NA	NA
5.538714953134096e-07-2	NC_044374.1	45130401	45131199	+	92.5419	798	Intergenic	Intergenic	-2858	LOC115717333	LOC115717333	XR_004011733	uncharacterized LOC115717333	lncRNA	NA	NA	NA	NA	NA	NA
0.00022452398303455756-2	NC_044378.1	42951601	42951999	+	92.5419	398	Intergenic	Intergenic	17364	LOC115697936	LOC115697936	XM_030625111	D-aminoacyl-tRNA deacylase	protein_coding	-0.204189787	1	1	0.270542593	1	1
0.00022452398303455756	NC_044373.1	43720401	43720799	+	92.5419	398	Intergenic	Intergenic	-455909	LOC115714342	LOC115714342	XM_030643016	crossover junction endonuclease EME1B,	protein_coding	0.902046469	1	1	0.725323807	1	1
5.538714953134096e-07-3	NC_044377.1	62976001	62976999	+	92.5419	998	Intergenic	Intergenic	28362	LOC115724451	LOC115724451	XM_030653738	F-box protein At1g10780,	protein_coding	3.077139849	0.040494225	0.207026727	-0.303094435	1	1
6.690417656993847e-07	NC_044370.1	5747401	5748199	+	92.4804	798	Intergenic	Intergenic	2884	LOC115706011	LOC115706011	XR_004009558	uncharacterized LOC115706011	lncRNA	NA	NA	NA	NA	NA	NA
6.926086991766744e-17	NC_044378.1	47404401	47406599	+	92.4804	2198	Intergenic	Intergenic	60123	LOC115696613	LOC115696613	XM_030623507	uncharacterized LOC115696613	protein_coding	NA	NA	NA	NA	NA	NA
2.215541106215612e-09	NC_044372.1	55581001	55582199	+	92.4595	1198	Intergenic	Intergenic	70246	LOC115710780	LOC115710780	XM_030639130	uncharacterized LOC115710780	protein_coding	NA	NA	NA	NA	NA	NA
2.215541106215612e-09-2	NC_044372.1	83834201	83835999	+	92.4595	1798	Intergenic	Intergenic	-65812	LOC115711031	LOC115711031	XM_030639371	uncharacterized LOC115711031	protein_coding	0.374376113	1	NA	0.925217262	1	NA
2.6703152512805683e-09	NC_044375.1	38341601	38342799	+	92.4171	1198	Intergenic	Intergenic	43688	LOC115718644	LOC115718644	XM_030647466	uncharacterized LOC115718644	protein_coding	NA	NA	NA	NA	NA	NA
3.309448289756222e-14	NC_044379.1	10620401	10622599	+	92.4171	2198	Intergenic	Intergenic	-7277	LOC115699824	LOC115699824	XM_030627369	uncharacterized mitochondrial protein AtMg00860-like	protein_coding	NA	NA	NA	NA	NA	NA
8.082406070982363e-07	NC_044378.1	2633601	2634399	+	92.4171	798	Intergenic	Intergenic	19006	LOC115696997	LOC115696997	XM_030623894	G-type lectin S-receptor-like serine/threonine-protein kinase SD2-5,	protein_coding	1.258634632	0.927138206	NA	1.819905449	0.772009593	1
9.765007392353349e-07	NC_044371.1	48705201	48706199	+	92.3518	998	Intergenic	Intergenic	-7160	LOC115705878	LOC115705878	XM_030633325	beta-galactosidase-like	protein_coding	-0.544199526	1	1	-3.539895985	0.001602395	0.016793507
9.765007392353349e-07-4	NC_044379.1	1788201	1789199	+	92.3518	998	Intergenic	Intergenic	-1001089	LOC115698919	LOC115698919	XM_030626122	extracellular ribonuclease LE	protein_coding	2.667802986	0.007814691	0.050323215	-3.483828726	2.07725E-15	9.57681E-14
9.765007392353349e-07-2	NC_044372.1	73103201	73103999	+	92.3518	798	Intergenic	Intergenic	-15133	LOC115710912	LOC115710912	XM_030639264	uncharacterized LOC115710912	protein_coding	0	1	NA	-1.770848997	0.849029162	NA
9.765007392353349e-07-3	NC_044373.1	66263801	66264799	+	92.3518	998	Intergenic	Intergenic	-37757	LOC115713586	LOC115713586	XM_030642074	uncharacterized LOC115713586	protein_coding	NA	NA	NA	NA	NA	NA
5.760506393261045e-14	NC_044374.1	63132801	63134199	+	92.3385	1398	Intergenic	Intergenic	5292	LOC115717893	LOC115717893	XM_030646862	uncharacterized LOC115717893	protein_coding	NA	NA	NA	NA	NA	NA
3.879613381910361e-09	NC_044371.1	75534401	75535599	+	92.3296	1198	Intergenic	Intergenic	18679	LOC115704371	LOC115704371	XM_030631581	putative RING-H2 finger protein ATL50	protein_coding	NA	NA	NA	NA	NA	NA
3.879613381910361e-09-2	NC_044375.1	69415401	69416599	+	92.3296	1198	Intergenic	Intergenic	-45675	LOC115720647	LOC115720647	XM_030649811	germin-like protein subfamily 1 member 13	protein_coding	4.032300882	0.040427587	0.206796037	0.540323135	1	1
1.1799137675161958e-06	NC_044375.1	45685201	45685999	+	92.2845	798	Intergenic	Intergenic	11341	LOC115720126	LOC115720126	XM_030649287	uncharacterized mitochondrial protein AtMg00860-like	protein_coding	NA	NA	NA	NA	NA	NA
2.3439131603435237e-11	NC_044370.1	48779601	48780999	+	92.2501	1398	Intergenic	Intergenic	11792	LOC115721109	LOC115721109	XM_030650358	uncharacterized LOC115721109	protein_coding	NA	NA	NA	NA	NA	NA
5.637643926521452e-09	NC_044378.1	6724801	6725999	+	92.2385	1198	Intergenic	Intergenic	-6771	LOC115697098	LOC115697098	XM_030624004	L-type lectin-domain containing receptor kinase IV.2	protein_coding	2.49521734	0.193352115	0.749809907	4.313099602	0.005843611	0.052143811
2.7880321071365684e-18	NC_044374.1	52088801	52091199	+	92.2252	2398	Intergenic	Intergenic	5778	LOC115717834	LOC115717834	XM_030646805	ATP synthase subunit 9, mitochondrial	protein_coding	0	1	NA	-0.998328082	1	NA
1.425854168570551e-06-3	NC_044375.1	62814201	62814999	+	92.2152	798	Intergenic	Intergenic	20321	LOC115720244	LOC115720244	XM_030649401	uncharacterized LOC115720244	protein_coding	NA	NA	NA	NA	NA	NA
1.425854168570551e-06-2	NC_044372.1	20284201	20284999	+	92.2152	798	Intergenic	Intergenic	14384	LOC115710522	LOC115710522	XM_030638885	uncharacterized LOC115710522	protein_coding	NA	NA	NA	NA	NA	NA
1.425854168570551e-06	NC_044370.1	88666001	88666799	+	92.2152	798	Intergenic	Intergenic	-52665	LOC115697154	LOC115697154	XM_030624063	WAT1-related protein At4g08300	protein_coding	2.601519499	0.005380858	0.036229855	3.316083638	5.73804E-05	0.000798689
1.7232509581910287e-06-2	NC_044375.1	62068201	62068999	+	92.1436	798	Intergenic	Intergenic	-7355	LOC115720242	LOC115720242	XM_030649399	uncharacterized LOC115720242	protein_coding	NA	NA	NA	NA	NA	NA
1.7232509581910287e-06	NC_044370.1	29566201	29567399	+	92.1436	1198	Intergenic	Intergenic	4003	LOC115719582	LOC115719582	XM_030648679	uncharacterized LOC115719582	protein_coding	NA	NA	NA	NA	NA	NA
8.193953240456001e-09	NC_044378.1	58085001	58085999	+	92.1436	998	Intergenic	Intergenic	-13805	LOC115696680	LOC115696680	XM_030623570	uncharacterized LOC115696680	protein_coding	NA	NA	NA	NA	NA	NA
8.193953240456001e-09-2	NW_022060470.1	46601	47999	+	92.1436	1398	Intergenic	Intergenic	-21828	LOC115702169	LOC115702169	XM_030629622	#N/A	protein_coding	NA	NA	NA	NA	NA	NA
2.0829172704296017e-06	NC_044370.1	101265801	101266599	+	92.0697	798	Intergenic	Intergenic	4168	LOC115696517	LOC115696517	XM_030623417	uncharacterized LOC115696517	protein_coding	-1.549161225	0.892941345	NA	-0.998320075	1	NA
2.0829172704296017e-06-3	NC_044374.1	38647001	38647799	+	92.0697	798	Intergenic	Intergenic	2672	LOC115717744	LOC115717744	XM_030646723	uncharacterized LOC115717744	protein_coding	NA	NA	NA	NA	NA	NA
2.0829172704296017e-06-4	NC_044375.1	44627801	44628599	+	92.0697	798	Intergenic	Intergenic	-81887	LOC115720120	LOC115720120	XM_030649281	uncharacterized LOC115720120	protein_coding	0.469670029	1	1	-0.219661927	1	1
2.0829172704296017e-06-5	NC_044379.1	11303401	11304199	+	92.0697	798	Intergenic	Intergenic	-17309	LOC115701313	LOC115701313	XM_030629069	uncharacterized LOC115701313	protein_coding	NA	NA	NA	NA	NA	NA
2.0829172704296017e-06-2	NC_044373.1	5816401	5817199	+	92.0697	798	Intergenic	Intergenic	-5726	LOC115712763	LOC115712763	XM_030641116	uncharacterized LOC115712763	protein_coding	3.923831726	0.017606809	0.101182567	0.543962114	1	1
1.1911858820679466e-08	NC_044376.1	4536401	4537799	+	92.0445	1398	Intergenic	Intergenic	-38132	LOC115722034	LOC115722034	XR_004012761	uncharacterized LOC115722034	lncRNA	NA	NA	NA	NA	NA	NA
1.1911858820679466e-08-2	NW_022060454.1	842601	843999	+	92.0445	1398	Intergenic	Intergenic	339142	LOC115702127	LOC115702127	XM_030629586	#N/A	protein_coding	-1.214863418	0.74862229	1	-0.136444746	1	1
1.436341056636772e-08-2	NC_044378.1	18656601	18657599	+	91.9934	998	Intergenic	Intergenic	10968	LOC115698415	LOC115698415	XR_004008163	small nucleolar RNA R71	snoRNA	NA	NA	NA	NA	NA	NA
1.436341056636772e-08	NC_044372.1	69022601	69023399	+	91.9934	798	Intergenic	Intergenic	41588	LOC115710886	LOC115710886	XM_030639238	uncharacterized LOC115710886	protein_coding	NA	NA	NA	NA	NA	NA
2.5179502913859697e-06-2	NC_044378.1	47104401	47105199	+	91.9934	798	Intergenic	Intergenic	-95142	LOC115696612	LOC115696612	XM_030623506	uncharacterized LOC115696612	protein_coding	NA	NA	NA	NA	NA	NA
2.5179502913859697e-06	NC_044378.1	10678001	10678999	+	91.9934	998	Intergenic	Intergenic	2774	LOC115698362	LOC115698362	XR_004008114	small nucleolar RNA R71	snoRNA	NA	NA	NA	NA	NA	NA
1.0357247034819204e-10	NC_044376.1	43794001	43795399	+	91.9543	1398	Intergenic	Intergenic	-33204	LOC115723851	LOC115723851	XM_030653316	uncharacterized LOC115723851	protein_coding	NA	NA	NA	NA	NA	NA
1.7320467455958724e-08	NC_044373.1	43529001	43529999	+	91.9411	998	Intergenic	Intergenic	283507	LOC115713438	LOC115713438	XM_030641921	uncharacterized LOC115713438	protein_coding	0.374376113	1	NA	0.925217262	1	NA
1.7320467455958724e-08-3	NC_044378.1	46357201	46357999	+	91.9411	798	Intergenic	Intergenic	13864	LOC115696606	LOC115696606	XM_030623499	uncharacterized LOC115696606	protein_coding	NA	NA	NA	NA	NA	NA
1.7320467455958724e-08-2	NC_044373.1	61994001	61994999	+	91.9411	998	Intergenic	Intergenic	21949	LOC115715378	LOC115715378	XR_004011253	small nucleolar RNA R71	snoRNA	-1.549169232	0.892939793	NA	0	1	NA
3.044216691051732e-06	NC_044371.1	59455201	59455799	+	91.9145	598	Intergenic	Intergenic	-44799	LOC115705828	LOC115705828	XM_030633273	3-ketoacyl-CoA synthase 1-like	protein_coding	-0.395315	1	1	-1.230322935	0.633890538	1
2.0887485116805287e-08-2	NC_044374.1	53227601	53228599	+	91.8876	998	Intergenic	Intergenic	-85807	LOC115717845	LOC115717845	XM_030646816	uncharacterized LOC115717845	protein_coding	NA	NA	NA	NA	NA	NA
2.0887485116805287e-08	NC_044371.1	64949401	64950199	+	91.8876	798	Intergenic	Intergenic	-7437	LOC115706918	LOC115706918	XR_004009664	uncharacterized LOC115706918,	lncRNA	NA	NA	NA	NA	NA	NA
1.5021038379164306e-10	NC_044372.1	4042401	4043799	+	91.8741	1398	Intergenic	Intergenic	-6775	LOC115709732	LOC115709732	XM_030637915	pre-mRNA-splicing factor ATP-dependent RNA helicase DEAH7,	protein_coding	-0.18304435	1	1	0.002658134	1	1
8.350842563699092e-15-2	NC_044379.1	13385401	13387599	+	91.8605	2198	Intergenic	Intergenic	9210	LOC115699613	LOC115699613	XM_030627104	NDR1/HIN1-like protein 1	protein_coding	1.261839922	0.122547199	0.521178056	0.208939631	1	1
8.350842563699092e-15	NC_044378.1	43140201	43142799	+	91.8605	2598	Intergenic	Intergenic	-39798	LOC115696846	LOC115696846	XM_030623731	peroxidase 19	protein_coding	-3.7208042	3.19417E-17	1.62869E-15	-2.983038627	8.27883E-10	2.25515E-08
6.361716827504905e-17	NW_022060454.1	716601	719599	+	91.8566	2998	Intergenic	Intergenic	213942	LOC115702127	LOC115702127	XM_030629586	#N/A	protein_coding	-1.214863418	0.74862229	1	-0.136444746	1	1
3.6809419892018682e-06-2	NC_044378.1	22915001	22915599	+	91.833	598	Intergenic	Intergenic	24506	LOC115697717	LOC115697717	XM_030624815	dnaJ protein homolog 1	protein_coding	1.283016656	0.234287208	0.872134585	0.899693189	1	1
3.6809419892018682e-06	NC_044377.1	3732001	3732999	+	91.833	998	promoter-TSS	-promoter-TSS (LOC115724577)	-1412	LOC115724577	LOC115724577	XM_030653895	peptidyl-prolyl cis-trans isomerase FKBP17-1, chloroplastic	protein_coding	-2.872819568	1.40681E-13	4.86387E-12	-0.945035809	1	1
1.3357323728557689e-12	NC_044374.1	3591801	3593799	+	91.833	1998	Intergenic	Intergenic	-14109	LOC115716456	LOC115716456	XM_030645262	uncharacterized LOC115716456,	protein_coding	2.946175673	0.080151079	0.368489295	2.497767727	0.112478742	0.642175142
2.1787674018938342e-10	NC_044375.1	64772001	64773399	+	91.7912	1398	Intergenic	Intergenic	-25046	LOC115718474	LOC115718474	XM_030647260	uncharacterized LOC115718474,	protein_coding	-2.386295855	6.50895E-05	0.000682605	-2.408291965	4.54067E-05	0.000644355
2.1787674018938342e-10-2	NC_044377.1	290001	291399	+	91.7912	1398	Intergenic	Intergenic	-25524	LOC115695619	LOC115695619	XM_030622676	heavy metal-associated isoprenylated plant protein 47-like	protein_coding	-2.999433104	0.380148295	NA	-3.745856045	0.208679766	1
3.038189862419741e-08	NC_044373.1	19401	20399	+	91.7771	998	Intergenic	Intergenic	13482	LOC115712527	LOC115712527	XM_030640816	probable WRKY transcription factor 40	protein_coding	-6.236467646	NA	NA	-4.765821344	NA	NA
2.624143741905973e-10-2	NC_044377.1	41629801	41630999	+	91.7486	1198	intron	-intron (LOC115695192, intron 1 of 2)	36572	LOC115695192	LOC115695192	XM_030622281	uncharacterized LOC115695192	protein_coding	0.194500735	1	1	0.99954429	1	1
4.451426308865543e-06	NC_044374.1	21704201	21704999	+	91.7486	798	Intergenic	Intergenic	-152283	LOC115715927	LOC115715927	XM_030644610	uncharacterized LOC115715927,	protein_coding	3.676951257	0.011774191	0.071715868	-1.171810032	0.846783061	1
4.451426308865543e-06-2	NC_044376.1	44049601	44050199	+	91.7486	598	Intergenic	Intergenic	97190	LOC115722339	LOC115722339	XR_004012813	uncharacterized LOC115722339	lncRNA	NA	NA	NA	NA	NA	NA
2.624143741905973e-10	NC_044374.1	10550401	10551599	+	91.7486	1198	Intergenic	Intergenic	5711	LOC115717553	LOC115717553	XM_030646539	uncharacterized mitochondrial protein AtMg00820-like	protein_coding	NA	NA	NA	NA	NA	NA
1.2259169116545972e-18	NC_044372.1	25421201	25424199	+	91.7486	2998	Intergenic	Intergenic	19791	LOC115710568	LOC115710568	XM_030638928	uncharacterized LOC115710568	protein_coding	NA	NA	NA	NA	NA	NA
3.664529608746738e-08	NC_044374.1	53827801	53828799	+	91.7199	998	Intergenic	Intergenic	15478	LOC115717848	LOC115717848	XM_030646818	uncharacterized LOC115717848	protein_coding	NA	NA	NA	NA	NA	NA
3.038604008521349e-14	NC_044377.1	44270001	44272599	+	91.6613	2598	Intergenic	Intergenic	66280	LOC115724943	LOC115724943	XM_030654320	ubiquitin thioesterase OTU1,	protein_coding	-0.292217158	1	1	0.204237474	1	1
5.383913875431991e-06-3	NC_044378.1	67481401	67481999	+	91.6613	598	Intergenic	Intergenic	17159	LOC115697771	LOC115697771	XM_030624896	uncharacterized LOC115697771,	protein_coding	3.593916362	0.128777023	0.54251166	0.6934082	1	1
4.420264900672266e-08	NC_044371.1	25749401	25750399	+	91.6613	998	TTS	-TTS (LOC115708370)	206	LOC115708370	LOC115708370	XR_004009870	small nucleolar RNA R71	snoRNA	NA	NA	NA	NA	NA	NA
5.383913875431991e-06-2	NC_044377.1	37468401	37469399	+	91.6613	998	Intergenic	Intergenic	-43632	LOC115695678	LOC115695678	XM_030622740	protein N-lysine methyltransferase METTL21A	protein_coding	0.755598691	1	1	0.119125668	1	1
5.383913875431991e-06	NC_044370.1	79899601	79900399	+	91.6613	798	TTS	-TTS (LOC115725194)	1411	LOC115725194	LOC115725194	XM_030654633	uncharacterized LOC115725194	protein_coding	NA	NA	NA	NA	NA	NA
5.332191026453419e-08	NC_044375.1	13000001	13000999	+	91.6014	998	Intergenic	Intergenic	-149027	LOC115719864	LOC115719864	XM_030649044	serine/arginine-rich splicing factor 11-like	protein_coding	NA	NA	NA	NA	NA	NA
6.512649610039423e-06	NC_044376.1	51119401	51119999	+	91.5709	598	Intergenic	Intergenic	-77031	LOC115723899	LOC115723899	XM_030653362	uncharacterized LOC115723899	protein_coding	NA	NA	NA	NA	NA	NA
6.432666979181474e-08	NC_044371.1	9234401	9235399	+	91.54	998	Intergenic	Intergenic	-16508	LOC115704844	LOC115704844	XM_030632055	putative acyl-activating enzyme 19	protein_coding	0.371256741	1	1	-0.069470344	1	1
6.432666979181474e-08-2	NC_044377.1	11423201	11424199	+	91.54	998	Intergenic	Intergenic	80384	LOC115724749	LOC115724749	XM_030654086	uncharacterized LOC115724749,	protein_coding	1.781315763	0.040942711	0.208930645	0.584900594	1	1
6.654169576265885e-10	NC_044374.1	72937601	72938799	+	91.5245	1198	promoter-TSS	-promoter-TSS (LOC115716865)	-1381	LOC115716865	LOC115716865	XM_030645770	protein translocase subunit SECA2, chloroplastic,	protein_coding	-0.748341792	1	1	0.081784365	1	1
7.879163487164575e-06-3	NC_044378.1	8814801	8815599	+	91.4772	798	Intergenic	Intergenic	-5504	LOC115697529	LOC115697529	XM_030624574	pentatricopeptide repeat-containing protein At2g01390,	protein_coding	0.174169817	1	1	-0.505839193	1	1
7.879163487164575e-06	NC_044371.1	42051201	42051799	+	91.4772	598	Intergenic	Intergenic	5563	LOC115704295	LOC115704295	XM_030631509	transcription factor CAULIFLOWER,	protein_coding	5.200838615	2.67635E-14	1.00287E-12	5.343440047	2.63824E-15	1.19665E-13
7.879163487164575e-06-2	NC_044378.1	2641601	2641999	+	91.4772	398	Intergenic	Intergenic	11206	LOC115696997	LOC115696997	XM_030623894	G-type lectin S-receptor-like serine/threonine-protein kinase SD2-5,	protein_coding	1.258634632	0.927138206	NA	1.819905449	0.772009593	1
9.533832279265796e-06-2	NC_044375.1	79749801	79750399	+	91.38	598	Intergenic	Intergenic	-8367	LOC115720387	LOC115720387	XM_030649538	uncharacterized LOC115720387	protein_coding	NA	NA	NA	NA	NA	NA
9.533832279265796e-06	NC_044372.1	74359401	74360199	+	91.38	798	Intergenic	Intergenic	-5627	LOC115709880	LOC115709880	XM_030638123	putative pentatricopeptide repeat-containing protein At1g68930	protein_coding	0.229655624	1	1	0.333967834	1	1
1.1298519769361055e-07-2	NC_044376.1	53745801	53746799	+	91.3468	998	Intergenic	Intergenic	-130413	LOC115724262	LOC115724262	XR_004013061	small nucleolar RNA R71	snoRNA	NA	NA	NA	NA	NA	NA
1.1298519769361055e-07	NC_044371.1	14435001	14435999	+	91.3468	998	Intergenic	Intergenic	10470	LOC115708077	LOC115708077	XM_030636254	probable zinc metalloprotease EGY2, chloroplastic	protein_coding	-3.215686839	2.89634E-07	4.49729E-06	-1.909039289	0.037780428	0.260627892
1.1298519769361055e-07-3	NC_044378.1	40641201	40642999	+	91.3468	1798	Intergenic	Intergenic	-44675	LOC115697245	LOC115697245	XM_030624173	BTB/POZ domain and ankyrin repeat-containing protein NPR1	protein_coding	-0.327013484	1	1	0.243051628	1	1
1.40171995703005e-09	NC_044376.1	9819801	9820999	+	91.3301	1198	Intergenic	Intergenic	-9054	LOC115723549	LOC115723549	XM_030653040	uncharacterized LOC115723549	protein_coding	NA	NA	NA	NA	NA	NA
9.734772310724831e-23	NC_044378.1	16225001	16228199	+	91.2978	3198	Intergenic	Intergenic	27758	LOC115697355	LOC115697355	XM_030624325	protein CHROMATIN REMODELING 4,	protein_coding	-0.145110842	1	1	-0.049234236	1	1
1.3634068753298338e-07	NC_044379.1	5594601	5595599	+	91.2792	998	Intergenic	Intergenic	298834	LOC115701102	LOC115701102	XM_030628797	homeobox-leucine zipper protein ATHB-54-like	protein_coding	-0.819603728	1	1	-2.807728882	0.002802251	0.027313252
1.153777926650017e-05	NC_044375.1	23912401	23912999	+	91.2792	598	Intergenic	Intergenic	26305	LOC115720897	LOC115720897	XM_030650101	ubiquitin recognition factor in ER-associated degradation protein 1	protein_coding	-1.427968376	0.205810043	0.786381727	0.130947172	1	1
2.7860580179451307e-13	NC_044377.1	17395801	17397599	+	91.2792	1798	Intergenic	Intergenic	63025	LOC115724706	LOC115724706	XR_004013260	uncharacterized LOC115724706	lncRNA	NA	NA	NA	NA	NA	NA
6.461982804941736e-19	NC_044373.1	48314001	48316999	+	91.2792	2998	Intergenic	Intergenic	-53384	TRNAQ-UUG_3	TRNAQ-UUG_3	TRNAQ-UUG_3	#N/A	tRNA	NA	NA	NA	NA	NA	NA
2.5878780888627187e-11	NC_044375.1	43674401	43675999	+	91.2377	1598	Intergenic	Intergenic	-119795	LOC115721317	LOC115721317	XM_030650591	tropomyosin-2-like	protein_coding	1.940454338	0.414144069	1	1.706036753	0.502563852	1
9.329321616912879e-19	NC_044370.1	35080601	35083399	+	91.2331	2798	Intergenic	Intergenic	-44606	LOC115710391	LOC115710391	XM_030638759	receptor-like protein kinase 7	protein_coding	0.98614548	1	1	1.598453093	0.029182877	0.20887453
1.6453596627166734e-07-2	NC_044378.1	22578001	22578799	+	91.2098	798	Intergenic	Intergenic	-12175	LOC115696430	LOC115696430	XM_030623332	uncharacterized LOC115696430	protein_coding	NA	NA	NA	NA	NA	NA
1.6453596627166734e-07	NC_044374.1	24854001	24855199	+	91.2098	1198	Intergenic	Intergenic	3830	LOC115717668	LOC115717668	XM_030646650	uncharacterized LOC115717668	protein_coding	NA	NA	NA	NA	NA	NA
1.3965185903759613e-05-4	NW_022060476.1	967801	968399	+	91.1744	598	Intergenic	Intergenic	236300	LOC115702188	LOC115702188	XM_030629636	#N/A	protein_coding	NA	NA	NA	NA	NA	NA
1.3965185903759613e-05-3	NC_044374.1	54164401	54164999	+	91.1744	598	Intergenic	Intergenic	-56895	LOC115717850	LOC115717850	XM_030646820	NAC domain-containing protein 1-like	protein_coding	NA	NA	NA	NA	NA	NA
1.3965185903759613e-05	NC_044374.1	5556201	5556999	+	91.1744	798	intron	-intron (LOC115716261, intron 6 of 6)	20554	LOC115716260	LOC115716260	XM_030645018	ABC transporter C family member 10	protein_coding	-0.610360064	1	1	-0.359164688	1	1
1.3965185903759613e-05-2	NC_044374.1	12998001	12998799	+	91.1744	798	Intergenic	Intergenic	-10679	LOC115716000	LOC115716000	XR_004011505	uncharacterized LOC115716000	lncRNA	NA	NA	NA	NA	NA	NA
2.4519593091162104e-09	NC_044374.1	72550801	72551999	+	91.1744	1198	Intergenic	Intergenic	-176803	LOC115717969	LOC115717969	XM_030646937	uncharacterized LOC115717969	protein_coding	NA	NA	NA	NA	NA	NA
1.9857675989928659e-07-2	NC_044373.1	43522201	43523199	+	91.1386	998	Intergenic	Intergenic	276707	LOC115713438	LOC115713438	XM_030641921	uncharacterized LOC115713438	protein_coding	0.374376113	1	NA	0.925217262	1	NA
1.9857675989928659e-07	NC_044372.1	6954401	6955599	+	91.1386	1198	Intergenic	Intergenic	-4438	LOC115709440	LOC115709440	XM_030637549	probable inactive purple acid phosphatase 27	protein_coding	1.618913851	0.655034327	1	-9.984885463	7.0507E-35	1.35761E-32
9.18759506012709e-15	NC_044377.1	59283801	59285599	+	91.1283	1798	Intergenic	Intergenic	7614	LOC115724571	LOC115724571	XM_030653882	uncharacterized LOC115724571	protein_coding	1.397904859	0.383394779	1	1.030415808	0.946555767	1
3.5604361966776533e-09	NC_044374.1	63063601	63064799	+	91.0656	1198	Intergenic	Intergenic	5960	LOC115716835	LOC115716835	XR_004011609	uncharacterized LOC115716835	lncRNA	NA	NA	NA	NA	NA	NA
1.690610587422253e-05	NC_044376.1	56059001	56059599	+	91.0656	598	Intergenic	Intergenic	-24439	LOC115721715	LOC115721715	XM_030650786	glutamate decarboxylase 4	protein_coding	0.81912853	NA	NA	1.610629614	NA	NA
2.3967845823912995e-07-2	NC_044374.1	48838201	48838999	+	91.0656	798	Intergenic	Intergenic	17753	LOC115715929	LOC115715929	XR_004011482	uncharacterized LOC115715929	lncRNA	NA	NA	NA	NA	NA	NA
2.3967845823912995e-07	NC_044370.1	33506201	33507199	+	91.0656	998	Intergenic	Intergenic	114050	LOC115710175	LOC115710175	XM_030638520	E3 ubiquitin-protein ligase RNF25	protein_coding	0.033704391	1	1	0.331649008	1	1
2.8930998509500924e-07-2	NC_044371.1	9232601	9233599	+	90.9906	998	Intergenic	Intergenic	-18308	LOC115704844	LOC115704844	XM_030632055	putative acyl-activating enzyme 19	protein_coding	0.371256741	1	1	-0.069470344	1	1
1.2220071728851023e-12-2	NC_044378.1	33928801	33930399	+	90.9906	1598	Intergenic	Intergenic	11887	LOC115698393	LOC115698393	XR_004008142	small nucleolar RNA R71	snoRNA	NA	NA	NA	NA	NA	NA
2.8930998509500924e-07-3	NC_044372.1	28478001	28478799	+	90.9906	798	Intergenic	Intergenic	-14263	LOC115709804	LOC115709804	XM_030638027	DNA-binding protein SMUBP-2	protein_coding	0.568228946	1	1	-0.123135676	1	1
2.8930998509500924e-07-4	NC_044376.1	33360801	33361599	+	90.9906	798	Intergenic	Intergenic	-9665	LOC115723774	LOC115723774	XM_030653247	uncharacterized mitochondrial protein AtMg00810-like	protein_coding	NA	NA	NA	NA	NA	NA
2.8930998509500924e-07	NC_044370.1	29186001	29186799	+	90.9906	798	Intergenic	Intergenic	18637	LOC115709427	LOC115709427	XM_030637533	trihelix transcription factor GT-2	protein_coding	-1.483172589	0.007608714	0.049213431	-1.771308981	1.82666E-05	0.000274909
1.2220071728851023e-12	NC_044370.1	80684601	80686599	+	90.9906	1998	Intergenic	Intergenic	-23042	LOC115720798	LOC115720798	XM_030649978	NADP-dependent malic enzyme	protein_coding	-0.149143969	1	1	-0.571798019	1	1
7.876349890222617e-11	NC_044371.1	15717801	15719399	+	90.9754	1598	Intergenic	Intergenic	-2440	LOC115703817	LOC115703817	XM_030631047	uncharacterized LOC115703817	protein_coding	0	1	NA	-0.998328082	1	NA
2.0469892114727018e-05-3	NW_022060387.1	9401	9999	+	90.9524	598	NA	NA	NA	NA			#N/A		NA	NA	NA	NA	NA	NA
2.0469892114727018e-05-4	NW_022060454.1	521401	521999	+	90.9524	598	Intergenic	Intergenic	17542	LOC115702127	LOC115702127	XM_030629586	#N/A	protein_coding	-1.214863418	0.74862229	1	-0.136444746	1	1
2.0469892114727018e-05	NC_044376.1	32047401	32047999	+	90.9524	598	Intergenic	Intergenic	15026	LOC115723345	LOC115723345	XM_030652788	protein SIEVE ELEMENT OCCLUSION B	protein_coding	1.390095979	0.392406908	1	-2.395167337	0.002147994	0.021721483
2.0469892114727018e-05-2	NC_044377.1	55809401	55809999	+	90.9524	598	Intergenic	Intergenic	-6995	LOC115725245	LOC115725245	XM_030654690	uncharacterized LOC115725245,	protein_coding	-0.007213372	1	1	0.440224326	1	1
9.482614377061269e-11	NC_044377.1	47607201	47608799	+	90.9292	1598	Intergenic	Intergenic	-115392	LOC115724704	LOC115724704	XM_030654044	putative lipid-transfer protein DIR1	protein_coding	NA	NA	NA	NA	NA	NA
3.4924688717720243e-07	NC_044372.1	62144801	62145799	+	90.9136	998	Intergenic	Intergenic	-180381	LOC115711226	LOC115711226	XR_004010435	uncharacterized LOC115711226,	lncRNA	NA	NA	NA	NA	NA	NA
1.0156254418961424e-17	NC_044379.1	51810201	51813599	+	90.9136	3398	Intergenic	Intergenic	21863	LOC115701783	LOC115701783	XR_004008763	small nucleolar RNA R71	snoRNA	NA	NA	NA	NA	NA	NA
3.4924688717720243e-07-2	NC_044379.1	45772401	45773399	+	90.9136	998	Intergenic	Intergenic	101995	LOC115700161	LOC115700161	XM_030627721	uncharacterized LOC115700161	protein_coding	NA	NA	NA	NA	NA	NA
1.1416761310998388e-10	NC_044372.1	55527001	55528399	+	90.8823	1398	Intergenic	Intergenic	16346	LOC115710780	LOC115710780	XM_030639130	uncharacterized LOC115710780	protein_coding	NA	NA	NA	NA	NA	NA
1.3745788856305032e-10	NC_044376.1	55815001	55816599	+	90.8346	1598	exon	-exon (LOC115723472, exon 2 of 2)	454	LOC115723472	LOC115723472	XR_004012969	uncharacterized LOC115723472	lncRNA	NA	NA	NA	NA	NA	NA
2.478937213500616e-05	NC_044372.1	59710801	59711599	+	90.8346	798	promoter-TSS	-promoter-TSS (LOC115710200)	-209	LOC115710200	LOC115710200	XM_030638548	auxin-induced protein 15A-like	protein_coding	0	1	NA	-1.850786648	0.833284852	NA
4.216355887439238e-07-3	NC_044375.1	54255001	54255999	+	90.8346	998	Intergenic	Intergenic	-103962	LOC115720200	LOC115720200	XM_030649356	uncharacterized LOC115720200	protein_coding	NA	NA	NA	NA	NA	NA
4.216355887439238e-07-2	NC_044375.1	48471401	48472399	+	90.8346	998	Intergenic	Intergenic	9487	LOC115720970	LOC115720970	XM_030650193	peptidyl-prolyl cis-trans isomerase FKBP16-3, chloroplastic-like	protein_coding	0	1	NA	-0.998328082	1	NA
7.511173548231253e-09	NC_044373.1	43352401	43353399	+	90.8346	998	Intergenic	Intergenic	106907	LOC115713438	LOC115713438	XM_030641921	uncharacterized LOC115713438	protein_coding	0.374376113	1	NA	0.925217262	1	NA
4.216355887439238e-07	NC_044371.1	44541801	44542999	+	90.8346	1198	Intergenic	Intergenic	15012	LOC115707076	LOC115707076	XR_004009687	uncharacterized LOC115707076	lncRNA	2.985889466	0.240638109	0.888037315	0.910189906	1	1
3.080466286719322e-12	NC_044379.1	2192401	2194199	+	90.7942	1798	Intergenic	Intergenic	-596489	LOC115698919	LOC115698919	XM_030626122	extracellular ribonuclease LE	protein_coding	2.667802986	0.007814691	0.050323215	-3.483828726	2.07725E-15	9.57681E-14
5.21920972873353e-46	NC_044372.1	55716201	55722999	+	90.7786	6798	Intergenic	Intergenic	1907	TRNAM-CAU_5	TRNAM-CAU_5	TRNAM-CAU_5	#N/A	tRNA	NA	NA	NA	NA	NA	NA
5.09071172508558e-07	NC_044375.1	91111001	91111799	+	90.7533	798	Intergenic	Intergenic	-2385	LOC115719291	LOC115719291	XR_004012142	uncharacterized LOC115719291	lncRNA	-0.933190281	1	1	-1.024532232	0.981862523	1
3.0025937337215788e-05-3	NC_044377.1	17289201	17289799	+	90.7118	598	Intergenic	Intergenic	8166	LOC115695020	LOC115695020	XM_030622118	uncharacterized LOC115695020	protein_coding	NA	NA	NA	NA	NA	NA
3.0025937337215788e-05	NC_044370.1	59529201	59529799	+	90.7118	598	Intergenic	Intergenic	-49282	LOC115713105	LOC115713105	XM_030641595	butyrate--CoA ligase AAE11, peroxisomal	protein_coding	-3.364031146	0.000413991	0.003725722	-0.040397677	1	1
3.0025937337215788e-05-2	NC_044374.1	62267201	62267599	+	90.7118	398	Intergenic	Intergenic	36979	LOC115716129	LOC115716129	XM_030644859	TOM1-like protein 3,	protein_coding	0.146526542	1	1	0.098275722	1	1
5.3067307453678855e-17	NC_044373.1	45589601	45591999	+	90.6698	2398	Intergenic	Intergenic	44971	LOC115713462	LOC115713462	XM_030641945	uncharacterized LOC115713462	protein_coding	NA	NA	NA	NA	NA	NA
6.146915494643195e-07	NC_044370.1	21853001	21853999	+	90.6698	998	Intergenic	Intergenic	-21958	LOC115706519	LOC115706519	XR_004009598	uncharacterized LOC115706519	lncRNA	NA	NA	NA	NA	NA	NA
6.146915494643195e-07-2	NC_044370.1	31372801	31373799	+	90.6698	998	Intergenic	Intergenic	46997	LOC115709841	LOC115709841	XM_030638081	probable inactive receptor kinase At5g67200	protein_coding	2.739193402	0.271150337	0.975272599	-6.303714923	5.10877E-07	9.76034E-06
6.146915494643195e-07-3	NC_044377.1	53406401	53407199	+	90.6698	798	Intergenic	Intergenic	-35337	LOC115725387	LOC115725387	XM_030654897	protein CHLOROPLAST IMPORT APPARATUS 2,	protein_coding	-3.153237326	9.85718E-26	9.38042E-24	-1.037678166	0.854967319	1
1.3154346389777314e-08	NC_044375.1	82516801	82517799	+	90.6485	998	Intergenic	Intergenic	-5577	LOC115719669	LOC115719669	XM_030648791	uncharacterized LOC115719669	protein_coding	0.382735256	1	1	0.410109608	1	1
6.377177217671959e-17	NW_022060476.1	931001	933599	+	90.6414	2598	Intergenic	Intergenic	200500	LOC115702188	LOC115702188	XM_030629636	#N/A	protein_coding	NA	NA	NA	NA	NA	NA
1.585738131910416e-08	NC_044376.1	57465601	57466599	+	90.5839	998	intron	-intron (LOC115721842, intron 2 of 2)	-7826	LOC115721802	LOC115721802	XM_030650880	probable RNA-dependent RNA polymerase 1	protein_coding	-1.809861656	0.265478559	0.959626615	0.055758617	1	1
3.637574939788749e-05-3	NW_022060387.1	1801	2399	+	90.5839	598	NA	NA	NA	NA			#N/A		NA	NA	NA	NA	NA	NA
3.4792727347556855e-10	NC_044371.1	29241001	29242399	+	90.5839	1398	Intergenic	Intergenic	38529	LOC115706025	LOC115706025	XM_030633523	uncharacterized LOC115706025	protein_coding	-0.721123621	1	1	-3.115107961	1.45304E-05	0.00022243
3.637574939788749e-05	NC_044374.1	45301801	45302199	+	90.5839	398	intron	-intron (LOC115716916, intron 1 of 3)	290	LOC115716916	LOC115716916	XR_004011630	uncharacterized LOC115716916	lncRNA	NA	NA	NA	NA	NA	NA
3.637574939788749e-05-2	NC_044374.1	54474601	54475199	+	90.5839	598	intron	-intron (LOC115717852, intron 2 of 2)	6877	LOC115717852	LOC115717852	XM_030646822	uncharacterized LOC115717852	protein_coding	NA	NA	NA	NA	NA	NA
7.768863067648154e-12	NC_044373.1	45992401	45993999	+	90.5839	1598	Intergenic	Intergenic	7315	LOC115712342	LOC115712342	XM_030640616	uncharacterized LOC115712342	protein_coding	1.931858425	0.137734743	0.573213889	2.334719336	0.032253958	0.227620457
7.422914899605712e-07-2	NC_044378.1	1771401	1772199	+	90.5839	798	Intergenic	Intergenic	-4078	LOC115698185	LOC115698185	XM_030625372	probable aminotransferase TAT2	protein_coding	-2.786407204	2.40661E-07	3.77959E-06	-4.792041735	1.78058E-28	2.41176E-26
7.422914899605712e-07	NC_044374.1	14023401	14024199	+	90.5839	798	Intergenic	Intergenic	-8771	LOC115716829	LOC115716829	XM_030645738	cleavage and polyadenylation specificity factor subunit 2	protein_coding	0.146923546	1	1	0.164460425	1	1
1.9116800595073022e-08-2	NC_044379.1	45383001	45383999	+	90.5178	998	Intergenic	Intergenic	-35481	LOC115698951	LOC115698951	XM_030626160	protein no-on-transient A	protein_coding	-0.385389319	1	1	-0.147487465	1	1
1.9116800595073022e-08	NC_044371.1	54734401	54735999	+	90.5178	1598	Intergenic	Intergenic	-176273	LOC115704145	LOC115704145	XM_030631362	uncharacterized LOC115704145	protein_coding	NA	NA	NA	NA	NA	NA
8.96460728878204e-07	NC_044372.1	12633401	12634399	+	90.4955	998	Intergenic	Intergenic	-13655	LOC115709645	LOC115709645	XM_030637806	ubiquitin-conjugating enzyme E2-23 kDa	protein_coding	0.045489384	1	1	-0.34893513	1	1
8.96460728878204e-07-4	NC_044379.1	33636801	33637799	+	90.4955	998	Intergenic	Intergenic	10052	LOC115699201	LOC115699201	XM_030626489	nucleolar protein 14	protein_coding	-0.158034257	1	1	0.933239842	1	1
8.96460728878204e-07-3	NC_044378.1	37955001	37955999	+	90.4955	998	Intergenic	Intergenic	126269	LOC115698228	LOC115698228	XM_030625429	dof zinc finger protein DOF5.1,	protein_coding	0.358629697	1	1	0.766423963	1	1
8.96460728878204e-07-2	NC_044375.1	82473401	82474199	+	90.4955	798	Intergenic	Intergenic	11917	LOC115720409	LOC115720409	XM_030649559	uncharacterized LOC115720409	protein_coding	0.395420075	1	NA	1.873797843	0.723232856	1
4.4077312745892435e-05	NC_044378.1	30543601	30544199	+	90.4504	598	intron	-intron (LOC115697022, intron 1 of 2)	807	LOC115697022	LOC115697022	XM_030623919	flavonol synthase/flavanone 3-hydroxylase-like	protein_coding	3.324028385	0.090546012	0.407245199	1.764946469	0.464570306	1
3.6743477360613313e-13	NC_044374.1	23629801	23631599	+	90.4308	1798	Intergenic	Intergenic	48833	LOC115718319	LOC115718319	XR_004011898	small nucleolar RNA R71	snoRNA	NA	NA	NA	NA	NA	NA
6.076237015298433e-10	NC_044377.1	47972201	47973599	+	90.423	1398	Intergenic	Intergenic	-19236	LOC115696083	LOC115696083	XR_004007681	small nucleolar RNA R71	snoRNA	NA	NA	NA	NA	NA	NA
6.076237015298433e-10-2	NC_044378.1	53293201	53294599	+	90.423	1398	Intergenic	Intergenic	-52073	LOC115696649	LOC115696649	XM_030623540	uncharacterized LOC115696649	protein_coding	NA	NA	NA	NA	NA	NA
1.0827512574316956e-06	NC_044370.1	40261801	40262599	+	90.4046	798	Intergenic	Intergenic	5989	LOC115702449	LOC115702449	XR_004008879	uncharacterized LOC115702449	lncRNA	0.519574744	1	1	-0.516925867	1	1
1.0827512574316956e-06-2	NC_044374.1	55028801	55029599	+	90.4046	798	Intergenic	Intergenic	-60768	LOC115717856	LOC115717856	XM_030646825	uncharacterized LOC115717856	protein_coding	NA	NA	NA	NA	NA	NA
3.9315625572874435e-24	NC_044376.1	11213801	11217999	+	90.3913	4198	promoter-TSS	-promoter-TSS (LOC115721794)	792	LOC115723565	LOC115723565	XM_030653055	uncharacterized LOC115723565	protein_coding	NA	NA	NA	NA	NA	NA
1.2096127221531739e-14	NW_022060514.1	30201	32399	+	90.3814	2198	NA	NA	NA	NA			#N/A		NA	NA	NA	NA	NA	NA
1.3078800075051196e-06-2	NC_044373.1	42815201	42815999	+	90.3109	798	Intergenic	Intergenic	-15008	LOC115713437	LOC115713437	XM_030641920	stress response protein NST1-like	protein_coding	-0.587400514	1	NA	-0.920448172	1	NA
5.3420718803643526e-05	NC_044374.1	44279801	44280199	+	90.3109	398	Intergenic	Intergenic	110270	LOC115717773	LOC115717773	XM_030646748	uncharacterized LOC115717773	protein_coding	NA	NA	NA	NA	NA	NA
1.3078800075051196e-06	NC_044370.1	75601601	75602399	+	90.3109	798	Intergenic	Intergenic	36172	LOC115714587	LOC115714587	XM_030643333	probable protein phosphatase 2C 60	protein_coding	0.171316991	1	1	0.304021085	1	1
1.3078800075051196e-06-4	NC_044379.1	10060801	10061599	+	90.3109	798	Intergenic	Intergenic	15069	LOC115699817	LOC115699817	XM_030627360	uncharacterized LOC115699817	protein_coding	NA	NA	NA	NA	NA	NA
1.3078800075051196e-06-3	NC_044373.1	50206601	50207399	+	90.3109	798	Intergenic	Intergenic	2774	LOC115713499	LOC115713499	XM_030641982	uncharacterized LOC115713499	protein_coding	NA	NA	NA	NA	NA	NA
1.5799744636253387e-06	NC_044374.1	11855001	11855799	+	90.2144	798	Intergenic	Intergenic	9948	LOC115717562	LOC115717562	XM_030646547	phosphate transporter PHO1 homolog 10-like	protein_coding	-3.486411276	0.516390739	NA	-0.998308366	1	NA
1.2784645093980784e-09	NC_044378.1	45568201	45569599	+	90.1948	1398	Intergenic	Intergenic	-7716	LOC115697291	LOC115697291	XM_030624234	ethylene response sensor 1,	protein_coding	1.000164167	0.999467688	1	1.331358268	0.177700328	0.929712279
6.47589375055505e-05-2	NC_044374.1	42714201	42714799	+	90.1651	598	Intergenic	Intergenic	13141	LOC115717225	LOC115717225	XM_030646197	#N/A	protein_coding	0.022299284	1	1	0.040720356	1	1
6.47589375055505e-05	NC_044370.1	88564801	88565399	+	90.1651	598	Intergenic	Intergenic	-62310	LOC115703272	LOC115703272	XR_004009049	small nucleolar RNA R71	snoRNA	NA	NA	NA	NA	NA	NA
4.871612789079978e-08	NC_044373.1	12799001	12800199	+	90.1651	1198	Intergenic	Intergenic	-13804	LOC115714982	LOC115714982	XM_030643757	glycine-rich RNA-binding protein	protein_coding	0.577415024	1	1	0.397808604	1	1
1.9088703540730073e-06-2	NC_044374.1	20947601	20948399	+	90.115	798	Intergenic	Intergenic	8363	LOC115716525	LOC115716525	XM_030645335	probable plastid-lipid-associated protein 3, chloroplastic	protein_coding	-1.977193252	3.4792E-07	5.3122E-06	-0.755437665	1	1
1.9088703540730073e-06	NC_044370.1	47784601	47785399	+	90.115	798	Intergenic	Intergenic	4040	LOC115711376	LOC115711376	XM_030639713	receptor-like protein 44	protein_coding	-0.470794843	1	1	0.129089197	1	1
1.9088703540730073e-06-4	NW_022060359.1	26201	26799	+	90.115	598	NA	NA	NA	NA			#N/A		NA	NA	NA	NA	NA	NA
1.9088703540730073e-06-3	NC_044376.1	4780401	4781199	+	90.115	798	Intergenic	Intergenic	-12149	LOC115721955	LOC115721955	XM_030651066	desiccation-related protein PCC13-62	protein_coding	0	1	NA	-4.39611473	0.269931436	1
4.948626115694272e-11	NC_044379.1	26328201	26329799	+	90.115	1598	exon	-exon (LOC115699963, exon 3 of 6)	798	LOC115699963	LOC115699963	XM_030627509	uncharacterized LOC115699963	protein_coding	0.374402963	1	NA	-2.309797514	0.740283256	NA
2.3064725389522403e-06-3	NC_044375.1	10943201	10943999	+	90.0125	798	Intergenic	Intergenic	55122	LOC115721386	LOC115721386	XM_030650672	uncharacterized LOC115721386	protein_coding	NA	NA	NA	NA	NA	NA
2.3064725389522403e-06	NC_044373.1	1038001	1038799	+	90.0125	798	intron	-intron (LOC115712341, intron 2 of 9)	16028	LOC115714805	LOC115714805	XM_030643562	xanthine dehydrogenase 1	protein_coding	0.069388118	1	1	0.411483007	1	1
2.3064725389522403e-06-2	NC_044374.1	74138201	74139199	+	90.0125	998	promoter-TSS	-promoter-TSS (LOC115717989)	7	LOC115717989	LOC115717989	XM_030646959	uncharacterized mitochondrial protein AtMg00860-like	protein_coding	NA	NA	NA	NA	NA	NA
7.852161785469482e-05	NC_044370.1	50623001	50623599	+	90.0125	598	Intergenic	Intergenic	30426	LOC115702478	LOC115702478	XM_030629921	uncharacterized LOC115702478	protein_coding	0	1	1	-6.421422231	0.002858626	0.02773884
8.62786984398347e-11	NC_044373.1	67776801	67778199	+	89.9601	1398	Intergenic	Intergenic	18739	LOC115715244	LOC115715244	XM_030644084	homeobox-leucine zipper protein ATHB-6	protein_coding	0.192934567	1	1	-0.258207623	1	1
8.545073409025316e-08-3	NC_044375.1	18893001	18894199	+	89.9335	1198	Intergenic	Intergenic	30516	LOC115719456	LOC115719456	XM_030648517	cyclin-dependent kinase D-3,	protein_coding	-0.205092863	1	1	0.346064581	1	1
8.545073409025316e-08	NC_044370.1	51300801	51301999	+	89.9335	1198	Intergenic	Intergenic	-28498	LOC115724014	LOC115724014	XR_004012984	uncharacterized LOC115724014	lncRNA	NA	NA	NA	NA	NA	NA
8.545073409025316e-08-4	NC_044377.1	41216201	41217599	+	89.9335	1398	Intergenic	Intergenic	115897	LOC115724718	LOC115724718	XR_004013262	uncharacterized LOC115724718	lncRNA	NA	NA	NA	NA	NA	NA
8.545073409025316e-08-2	NC_044374.1	79046201	79047399	+	89.9335	1198	Intergenic	Intergenic	-32904	LOC115715960	LOC115715960	XR_004011492	uncharacterized LOC115715960	lncRNA	-1.549187565	0.812839443	1	-5.328153581	0.032328698	0.227984066
1.450645271254893e-16	NC_044370.1	27812001	27814199	+	89.9175	2198	Intergenic	Intergenic	17157	LOC115719342	LOC115719342	XM_030648336	uncharacterized LOC115719342	protein_coding	NA	NA	NA	NA	NA	NA
2.7871926058826045e-06-2	NC_044372.1	11309201	11309799	+	89.9068	598	Intergenic	Intergenic	24433	LOC115710419	LOC115710419	XM_030638783	uncharacterized LOC115710419	protein_coding	NA	NA	NA	NA	NA	NA
2.7871926058826045e-06-4	NC_044379.1	52353201	52353999	+	89.9068	798	Intergenic	Intergenic	-10832	LOC115700836	LOC115700836	XM_030628500	probable membrane metalloprotease ARASP2, chloroplastic	protein_coding	-2.697206427	3.6152E-22	2.6936E-20	-0.749769189	1	1
2.7871926058826045e-06-5	NW_022060352.1	31401	31999	+	89.9068	598	NA	NA	NA	NA			#N/A		NA	NA	NA	NA	NA	NA
2.7871926058826045e-06-3	NC_044375.1	42148401	42148999	+	89.9068	598	intron	-intron (LOC115720109, intron 1 of 5)	9167	LOC115720109	LOC115720109	XM_030649271	ankyrin repeat domain-containing protein, chloroplastic-like	protein_coding	-1.590213085	0.446982137	1	-0.732317366	1	1
2.7871926058826045e-06	NC_044371.1	65400001	65400799	+	89.9068	798	Intergenic	Intergenic	-12439	LOC115705110	LOC115705110	XM_030632351	LOB domain-containing protein 12-like	protein_coding	NA	NA	NA	NA	NA	NA
9.523196591378531e-05	NC_044370.1	13404801	13405399	+	89.8527	598	promoter-TSS	-promoter-TSS (LOC115703306)	489	LOC115716762	LOC115716762	XM_030645662	uncharacterized LOC115716762	protein_coding	NA	NA	NA	NA	NA	NA
9.523196591378531e-05-4	NC_044374.1	70082001	70082599	+	89.8527	598	Intergenic	Intergenic	-8685	LOC115716830	LOC115716830	XM_030645739	protein LURP-one-related 4	protein_coding	4.450973956	0.02018444	0.11348508	2.284187141	0.22372125	1
1.0306582916241818e-07	NC_044377.1	56218001	56219599	+	89.8527	1598	Intergenic	Intergenic	-28970	LOC115695285	LOC115695285	XM_030622360	uncharacterized LOC115695285	protein_coding	NA	NA	NA	NA	NA	NA
9.523196591378531e-05-2	NC_044371.1	9359801	9360399	+	89.8527	598	Intergenic	Intergenic	5589	LOC115704787	LOC115704787	XM_030631996	probable protein phosphatase 2C 25	protein_coding	0.45012684	1	1	0.90307363	1	1
9.523196591378531e-05-3	NC_044373.1	24699801	24700399	+	89.8527	598	Intergenic	Intergenic	-59263	LOC115713270	LOC115713270	XM_030641752	actin cytoskeleton-regulatory complex protein PAN1-like	protein_coding	NA	NA	NA	NA	NA	NA
1.917532611909599e-13	NC_044379.1	1594601	1596799	+	89.8115	2198	Intergenic	Intergenic	-1182897	LOC115698860	LOC115698860	XM_030626068	amino acid transporter AVT1I	protein_coding	-1.967867848	0.196163411	0.757198644	1.423663466	0.584848218	1
3.368479596945029e-06-2	NC_044377.1	41240001	41240799	+	89.7977	798	Intergenic	Intergenic	139397	LOC115724718	LOC115724718	XR_004013262	uncharacterized LOC115724718	lncRNA	NA	NA	NA	NA	NA	NA
3.368479596945029e-06	NC_044372.1	64816601	64817399	+	89.7977	798	Intergenic	Intergenic	-27533	LOC115710861	LOC115710861	XM_030639216	uncharacterized LOC115710861	protein_coding	NA	NA	NA	NA	NA	NA
3.368479596945029e-06-3	NC_044378.1	34928201	34928999	+	89.7977	798	Intergenic	Intergenic	55805	LOC115696522	LOC115696522	XM_030623420	uncharacterized LOC115696522	protein_coding	NA	NA	NA	NA	NA	NA
4.705475277563916e-09-2	NC_044376.1	35876401	35877599	+	89.753	1198	Intergenic	Intergenic	2502	LOC115723803	LOC115723803	XM_030653273	uncharacterized LOC115723803	protein_coding	-3.07733982	0.602785004	NA	-0.998307353	1	NA
4.705475277563916e-09	NC_044371.1	54654401	54655599	+	89.753	1198	Intergenic	Intergenic	-256473	LOC115704145	LOC115704145	XM_030631362	uncharacterized LOC115704145	protein_coding	NA	NA	NA	NA	NA	NA
2.772244952049778e-13	NC_044375.1	14037601	14040199	+	89.7277	2598	Intergenic	Intergenic	-12251	LOC115719874	LOC115719874	XM_030649055	uncharacterized LOC115719874	protein_coding	-1.549152999	0.892942939	NA	-1.986379105	0.806642434	NA
4.071463838038874e-06-3	NC_044377.1	21469601	21470599	+	89.685	998	exon	-exon (LOC115724937, exon 2 of 6)	1143	LOC115724937	LOC115724937	XR_004013316	uncharacterized LOC115724937,	lncRNA	-0.598044634	1	1	-0.552791764	1	1
4.071463838038874e-06-2	NC_044375.1	38422201	38422999	+	89.685	798	Intergenic	Intergenic	-120989	LOC115721222	LOC115721222	XM_030650479	uncharacterized LOC115721222	protein_coding	-0.091652333	1	1	0.209222848	1	1
4.071463838038874e-06-4	NC_044379.1	21264401	21264999	+	89.685	598	Intergenic	Intergenic	119067	LOC115698728	LOC115698728	XM_030625874	uncharacterized endoplasmic reticulum membrane protein C16E8.02	protein_coding	0.448395781	1	1	1.032788667	0.874158406	1
4.071463838038874e-06	NC_044370.1	19430601	19431399	+	89.685	798	Intergenic	Intergenic	-12807	LOC115705600	LOC115705600	XM_030632978	ferrochelatase-2, chloroplastic	protein_coding	0.657818102	1	1	0.162261313	1	1
1.4996598832761627e-07-2	NC_044374.1	82284401	82285399	+	89.685	998	Intergenic	Intergenic	19681	LOC115716469	LOC115716469	XM_030645275	plant intracellular Ras-group-related LRR protein 5	protein_coding	-1.251039797	0.09640427	0.429971991	-0.573110791	1	1
0.00011552740065374154-3	NC_044378.1	61693401	61693799	+	89.685	398	Intergenic	Intergenic	13536	LOC115697873	LOC115697873	XM_030625039	puromycin-sensitive aminopeptidase,	protein_coding	-0.229287151	1	1	0.201071297	1	1
0.00011552740065374154	NC_044375.1	20467801	20468399	+	89.685	598	Intergenic	Intergenic	19046	LOC115720820	LOC115720820	XM_030649997	general transcription and DNA repair factor IIH subunit TFB4,	protein_coding	0.21278364	1	1	0.253975582	1	1
1.4996598832761627e-07	NC_044373.1	57298801	57299799	+	89.685	998	Intergenic	Intergenic	139532	LOC115714827	LOC115714827	XR_004011126	uncharacterized LOC115714827	lncRNA	NA	NA	NA	NA	NA	NA
0.00011552740065374154-2	NC_044377.1	45463401	45463799	+	89.685	398	Intergenic	Intergenic	106737	LOC115724960	LOC115724960	XM_030654343	lysine--tRNA ligase, cytoplasmic,	protein_coding	0.475965574	1	1	0.441375569	1	1
4.008106507033116e-13	NC_044374.1	77187801	77189799	+	89.6418	1998	Intergenic	Intergenic	361242	LOC115718006	LOC115718006	XM_030646974	uncharacterized LOC115718006	protein_coding	0	1	NA	-0.998328082	1	NA
1.0208731824095838e-11	NC_044377.1	14346401	14347999	+	89.6356	1598	Intergenic	Intergenic	-47581	LOC115724470	LOC115724470	XM_030653762	nifU-like protein 3, chloroplastic	protein_coding	-1.98813057	0.006329145	0.041758525	-1.00135746	0.997013013	1
1.80914407175504e-07	NC_044370.1	44539401	44540399	+	89.5981	998	Intergenic	Intergenic	6844	LOC115711214	LOC115711214	XM_030639545	protein RICE SALT SENSITIVE 3	protein_coding	-0.693406223	1	1	-1.249656978	0.75975891	1
1.80914407175504e-07-2	NC_044371.1	83371601	83372399	+	89.5981	798	Intergenic	Intergenic	-59333	LOC115706663	LOC115706663	XM_030634378	spastin	protein_coding	0.226566894	1	1	0.124813227	1	1
1.2281347193015328e-11	NC_044377.1	58411001	58412599	+	89.5855	1598	Intergenic	Intergenic	18580	LOC115724685	LOC115724685	XM_030654024	vicianin hydrolase	protein_coding	3.448208057	0.063337763	0.302720493	-2.629489952	0.007425385	0.064216011
4.921738163887591e-06	NC_044371.1	54736801	54737599	+	89.5686	798	Intergenic	Intergenic	-174273	LOC115704145	LOC115704145	XM_030631362	uncharacterized LOC115704145	protein_coding	NA	NA	NA	NA	NA	NA
4.921738163887591e-06-2	NC_044371.1	60688001	60688799	+	89.5686	798	Intergenic	Intergenic	-8376	LOC115704188	LOC115704188	XM_030631402	uncharacterized LOC115704188	protein_coding	NA	NA	NA	NA	NA	NA
0.00014018485179464115	NC_044373.1	64169401	64169799	+	89.509	398	Intergenic	Intergenic	-4324	LOC115714519	LOC115714519	XM_030643250	40S ribosomal protein S25	protein_coding	0.696985752	1	1	0.897118555	1	1
5.950306099938601e-06-2	NC_044373.1	28094001	28094999	+	89.4483	998	Intergenic	Intergenic	68417	LOC115713302	LOC115713302	XM_030641780	pathogenesis-related thaumatin-like protein 3.5	protein_coding	NA	NA	NA	NA	NA	NA
4.578373026352718e-10	NC_044379.1	10811201	10812599	+	89.4483	1398	Intergenic	Intergenic	27589	LOC115699827	LOC115699827	XM_030627371	uncharacterized LOC115699827	protein_coding	NA	NA	NA	NA	NA	NA
5.950306099938601e-06	NC_044372.1	58352001	58353199	+	89.4483	1198	Intergenic	Intergenic	53614	LOC115710804	LOC115710804	XM_030639155	uncharacterized LOC115710804	protein_coding	0.37439708	1	NA	-1.593347587	0.881791434	NA
1.5983335543652529e-52	NC_044370.1	104003401	104011999	+	89.403	8598	Intergenic	Intergenic	-5310	LOC115702086	LOC115702086	XM_030629532	zinc finger CCCH domain-containing protein 15,	protein_coding	-0.305604529	1	1	-0.33177898	1	1
1.1948525469055603e-08	NC_044374.1	446201	447399	+	89.399	1198	Intergenic	Intergenic	3969	LOC115717328	LOC115717328	XM_030646300	GRF1-interacting factor 1	protein_coding	1.54872783	0.311922152	1	2.231477353	0.024228777	0.177889041
1.211652791682484e-12	NC_044377.1	43412201	43414399	+	89.371	2198	Intergenic	Intergenic	-353081	LOC115695201	LOC115695201	XM_030622286	uncharacterized LOC115695201	protein_coding	NA	NA	NA	NA	NA	NA
7.194732986236401e-06	NC_044370.1	36666001	36666799	+	89.3239	798	Intergenic	Intergenic	-51352	LOC115703362	LOC115703362	XR_004009134	small nucleolar RNA R71	snoRNA	NA	NA	NA	NA	NA	NA
1.4398220563975156e-08	NC_044375.1	44252201	44253399	+	89.3239	1198	promoter-TSS	-promoter-TSS (LOC115720712)	-1397	LOC115720712	LOC115720712	XM_030649879	protein CHLOROPLAST IMPORT APPARATUS 2	protein_coding	-6.831607634	9.03315E-05	0.000926103	-5.635272286	0.001985236	0.020370974
3.177513246169217e-07	NC_044371.1	16382201	16383199	+	89.3239	998	Intergenic	Intergenic	-6161	LOC115705855	LOC115705855	XM_030633301	ubiquitin-conjugating enzyme E2 7	protein_coding	-0.116262806	1	1	0.349877381	1	1
0.00017015176710280568	NC_044370.1	66281601	66281999	+	89.3239	398	Intergenic	Intergenic	-22788	LOC115713490	LOC115713490	XM_030641975	uncharacterized LOC115713490	protein_coding	2.40612233	0.023008751	0.127243158	1.329214708	0.57006501	1
3.177513246169217e-07-2	NC_044374.1	38475001	38476199	+	89.3239	1198	Intergenic	Intergenic	8729	LOC115717742	LOC115717742	XM_030646721	uncharacterized LOC115717742	protein_coding	NA	NA	NA	NA	NA	NA
0.00017015176710280568-2	NW_022060321.1	1	399	+	89.3239	398	NA	NA	NA	NA			#N/A		NA	NA	NA	NA	NA	NA
3.177513246169217e-07-3	NC_044374.1	53144401	53145399	+	89.3239	998	Intergenic	Intergenic	-28805	LOC115715990	LOC115715990	XM_030644677	eukaryotic translation initiation factor 2D,	protein_coding	-0.322081693	1	1	0.159332061	1	1
3.291988404108983e-15	NC_044372.1	94667801	94670599	+	89.3239	2798	Intergenic	Intergenic	17085	LOC115711655	LOC115711655	XM_030640027	probable folate-biopterin transporter 4	protein_coding	-0.006485042	1	1	-0.610070793	1	1
8.301756795031448e-14	NC_044373.1	37191801	37193799	+	89.2815	1998	Intergenic	Intergenic	-4334	LOC115713372	LOC115713372	XM_030641853	uncharacterized LOC115713372	protein_coding	NA	NA	NA	NA	NA	NA
7.98932579204572e-10-3	NC_044379.1	194001	195399	+	89.2601	1398	Intergenic	Intergenic	163944	LOC115700627	LOC115700627	XM_030628235	protein sym-1	protein_coding	-0.016917343	1	1	0.164646111	1	1
7.98932579204572e-10-2	NC_044371.1	46914801	46916599	+	89.2601	1798	Intergenic	Intergenic	-38110	LOC115704098	LOC115704098	XM_030631317	stress-response A/B barrel domain-containing protein UP3	protein_coding	0.80635647	1	1	1.234154429	0.552085731	1
7.98932579204572e-10	NC_044370.1	40243401	40244399	+	89.2601	998	Intergenic	Intergenic	9641	LOC115710763	LOC115710763	XM_030639118	ras-related protein RABH1b	protein_coding	0.324923927	1	1	0.208182313	1	1
1.7350880358786162e-08	NC_044373.1	16693601	16695399	+	89.2472	1798	Intergenic	Intergenic	8285	LOC115712665	LOC115712665	XM_030640985	serine/threonine-protein kinase PBS1	protein_coding	-0.316404008	1	1	0.405176822	1	1
1.7350880358786162e-08-2	NC_044377.1	25074801	25075999	+	89.2472	1198	Intergenic	Intergenic	-19888	LOC115724736	LOC115724736	XM_030654071	probable serine/threonine-protein kinase PBL23	protein_coding	-3.118555779	0.081011206	0.371222504	-4.79472627	0.001371886	0.014533296
4.1992965306600425e-24	NC_044376.1	53230401	53233999	+	89.2335	3598	Intergenic	Intergenic	-465336	LOC115724380	LOC115724380	XR_004013173	small nucleolar RNA R71	snoRNA	NA	NA	NA	NA	NA	NA
2.1070016776454532e-12	NC_044377.1	25599601	25601799	+	89.2277	2198	Intergenic	Intergenic	77231	LOC115696115	LOC115696115	XR_004007710	small nucleolar RNA R71	snoRNA	NA	NA	NA	NA	NA	NA
4.4809562064557845e-11	NC_044379.1	63597801	63599399	+	89.2138	1598	Intergenic	Intergenic	-3953	LOC115700436	LOC115700436	XM_030627976	uncharacterized LOC115700436	protein_coding	-0.587404567	1	NA	0.925225269	1	NA
8.700543865322359e-06	NW_022060454.1	644001	644799	+	89.1951	798	Intergenic	Intergenic	140242	LOC115702127	LOC115702127	XM_030629586	#N/A	protein_coding	-1.214863418	0.74862229	1	-0.136444746	1	1
4.407748642158423e-20	NC_044377.1	66448601	66452399	+	89.1858	3798	Intergenic	Intergenic	19022	LOC115724868	LOC115724868	XR_004013297	uncharacterized LOC115724868	lncRNA	NA	NA	NA	NA	NA	NA
2.0909937042206735e-08-2	NC_044379.1	22614801	22615999	+	89.1688	1198	Intergenic	Intergenic	-12482	LOC115701409	LOC115701409	XM_030629197	methyl-CpG-binding domain protein 4-like protein,	protein_coding	1.186495445	0.633014035	1	0.791339296	1	1
2.0909937042206735e-08	NC_044374.1	54432201	54433199	+	89.1688	998	Intergenic	Intergenic	49077	LOC115717852	LOC115717852	XM_030646822	uncharacterized LOC115717852	protein_coding	NA	NA	NA	NA	NA	NA
1.1581574895407605e-09	NC_044376.1	54794801	54796399	+	89.1291	1598	Intergenic	Intergenic	23689	LOC115723922	LOC115723922	XM_030653383	TPR and ankyrin repeat-containing protein 1-like	protein_coding	NA	NA	NA	NA	NA	NA
0.00020658414958649572-2	NC_044379.1	1577201	1577599	+	89.1291	398	Intergenic	Intergenic	-1164597	LOC115698860	LOC115698860	XM_030626068	amino acid transporter AVT1I	protein_coding	-1.967867848	0.196163411	0.757198644	1.423663466	0.584848218	1
4.6271611500563446e-07-2	NW_022060487.1	523601	524599	+	89.1291	998	NA	NA	NA	NA			#N/A		NA	NA	NA	NA	NA	NA
3.047064650719897e-12	NC_044373.1	9288201	9289999	+	89.1291	1798	Intergenic	Intergenic	143132	LOC115712132	LOC115712132	XM_030640373	uncharacterized LOC115712132	protein_coding	2.33399886	0.208092288	0.793524708	4.453665889	0.010119502	0.083930332
0.00020658414958649572	NC_044378.1	30180001	30180399	+	89.1291	398	Intergenic	Intergenic	15762	LOC115696477	LOC115696477	XM_030623377	uncharacterized LOC115696477	protein_coding	NA	NA	NA	NA	NA	NA
4.6271611500563446e-07	NC_044370.1	59689601	59690399	+	89.1291	798	Intergenic	Intergenic	9513	LOC115722700	LOC115722700	XM_030651982	uncharacterized LOC115722700	protein_coding	NA	NA	NA	NA	NA	NA
7.218876582592919e-107	NC_044378.1	35885601	35904399	+	89.1025	18798	intron	-intron (LOC115696531, intron 28 of 28)	22643	LOC115696531	LOC115696531	XM_030623428	TATA-binding protein-associated factor BTAF1	protein_coding	-0.793549844	1	1	-0.215136589	1	1
2.520013073905799e-08	NC_044374.1	7865401	7866199	+	89.0889	798	promoter-TSS	-promoter-TSS (LOC115716711)	-1853	LOC115716711	LOC115716711	XM_030645587	reticulon-like protein B2	protein_coding	1.354424672	0.125525515	0.53125869	1.17388106	0.449353265	1
3.664357923271739e-12	NC_044370.1	102733201	102734999	+	89.0787	1798	Intergenic	Intergenic	-7856	LOC115701091	LOC115701091	XM_030628789	jasmonate O-methyltransferase	protein_coding	-1.582005472	0.074602724	0.347152786	0.930545131	1	1
1.0522921521964338e-05-6	NW_022060387.1	3201	3999	+	89.0618	798	NA	NA	NA	NA			#N/A		NA	NA	NA	NA	NA	NA
2.083638605380534e-13	NC_044371.1	43093801	43094999	+	89.0618	1198	Intergenic	Intergenic	-35491	LOC115706674	LOC115706674	XM_030634389	thiol protease aleurain-like	protein_coding	-0.770361068	1	1	-0.733972414	1	1
1.0522921521964338e-05-2	NC_044375.1	82471001	82471599	+	89.0618	598	Intergenic	Intergenic	-11676	LOC115720408	LOC115720408	XM_030649558	uncharacterized LOC115720408	protein_coding	NA	NA	NA	NA	NA	NA
1.0522921521964338e-05	NC_044373.1	45188401	45189399	+	89.0618	998	Intergenic	Intergenic	-10639	LOC115713449	LOC115713449	XM_030641934	nucleolar protein dao-5-like	protein_coding	NA	NA	NA	NA	NA	NA
1.3944865226345072e-09	NC_044377.1	33707801	33709199	+	89.0618	1398	Intergenic	Intergenic	-8529	LOC115695108	LOC115695108	XM_030622198	uncharacterized LOC115695108	protein_coding	NA	NA	NA	NA	NA	NA
1.0522921521964338e-05-4	NC_044378.1	16229401	16229999	+	89.0618	598	Intergenic	Intergenic	30858	LOC115697355	LOC115697355	XM_030624325	protein CHROMATIN REMODELING 4,	protein_coding	-0.145110842	1	1	-0.049234236	1	1
1.0522921521964338e-05-5	NC_044379.1	61398801	61399599	+	89.0618	798	Intergenic	Intergenic	10691	LOC115699269	LOC115699269	XM_030626603	eukaryotic translation initiation factor 5,	protein_coding	0.369472824	1	1	0.304471211	1	1
1.0522921521964338e-05-3	NC_044377.1	65833801	65834599	+	89.0618	798	intron	-intron (LOC115724630, intron 1 of 2)	2287	LOC115724630	LOC115724630	XM_030653960	probable LRR receptor-like serine/threonine-protein kinase At3g47570,	protein_coding	2.095549919	0.00950531	0.059673603	2.164385065	0.004720668	0.043042671
6.838871159742267e-16	NC_044371.1	1114401	1116999	+	89.0371	2598	TTS	-TTS (LOC115706647)	6586	LOC115706647	LOC115706647	XM_030634363	ATP-dependent DNA helicase SRS2-like protein At4g25120	protein_coding	0.951581074	1	1	0.599599559	1	1
5.584390509243795e-07-3	NC_044377.1	5050401	5051399	+	89.0277	998	Intergenic	Intergenic	6461	LOC115695919	LOC115695919	XM_030623015	(R)-mandelonitrile lyase 1	protein_coding	2.942634295	0.07795558	0.360052888	-5.690918076	1.51353E-08	3.52201E-07
5.584390509243795e-07	NC_044371.1	38947201	38948199	+	89.0277	998	Intergenic	Intergenic	-10955	LOC115704033	LOC115704033	XM_030631256	#N/A	protein_coding	0.230554528	1	1	0.792950977	1	1
5.584390509243795e-07-2	NC_044376.1	24523201	24524799	+	89.0277	1598	Intergenic	Intergenic	1381	LOC115724247	LOC115724247	XR_004013047	small nucleolar RNA R71	snoRNA	NA	NA	NA	NA	NA	NA
1.6790870997977857e-09	NC_044373.1	40284401	40285799	+	88.9934	1398	Intergenic	Intergenic	-12542	LOC115712708	LOC115712708	XM_030641044	uncharacterized LOC115712708	protein_coding	-1.07787383	0.689760759	1	-0.145258183	1	1
9.39189522183501e-11	NC_044378.1	31631601	31633399	+	88.9835	1798	Intergenic	Intergenic	-19116	LOC115698031	LOC115698031	XR_004008022	uncharacterized LOC115698031	lncRNA	2.741866485	0.288290805	1	-3.621622953	0.023247369	0.171904491
5.2996378256491605e-12	NC_044377.1	17228001	17229799	+	88.9761	1798	Intergenic	Intergenic	32863	LOC115695019	LOC115695019	XM_030622117	beta-1,2-xylosyltransferase XYXT1-like	protein_coding	NA	NA	NA	NA	NA	NA
1.2728769744484045e-05	NC_044372.1	68385401	68385999	+	88.9237	598	Intergenic	Intergenic	-16281	LOC115711506	LOC115711506	XM_030639851	thylakoid membrane protein TERC, chloroplastic,	protein_coding	-2.015861759	4.80114E-08	8.44394E-07	-0.69881123	1	1
6.740151506826464e-07-3	NC_044373.1	23784801	23785999	+	88.9237	1198	Intergenic	Intergenic	-21469	LOC115714847	LOC115714847	XM_030643615	UDP-glycosyltransferase 92A1-like	protein_coding	3.779466942	0.080940949	0.371077477	-0.458252731	1	1
2.0218294078699527e-09	NC_044375.1	63969801	63970999	+	88.9237	1198	Intergenic	Intergenic	-17766	LOC115720252	LOC115720252	XM_030649408	uncharacterized LOC115720252	protein_coding	NA	NA	NA	NA	NA	NA
6.740151506826464e-07	NC_044372.1	45258001	45259399	+	88.9237	1398	Intergenic	Intergenic	48327	LOC115710724	LOC115710724	XM_030639078	uncharacterized LOC115710724	protein_coding	NA	NA	NA	NA	NA	NA
6.740151506826464e-07-2	NC_044372.1	52770801	52771599	+	88.9237	798	Intergenic	Intergenic	59579	LOC115710762	LOC115710762	XM_030639115	uncharacterized LOC115710762	protein_coding	NA	NA	NA	NA	NA	NA
1.2728769744484045e-05-2	NC_044375.1	59139601	59140999	+	88.9237	1398	Intergenic	Intergenic	-11413	LOC115721040	LOC115721040	XR_004012363	uncharacterized LOC115721040	lncRNA	NA	NA	NA	NA	NA	NA
2.4346041353135984e-09-3	NW_022060476.1	899201	900999	+	88.8527	1798	Intergenic	Intergenic	168300	LOC115702188	LOC115702188	XM_030629636	#N/A	protein_coding	NA	NA	NA	NA	NA	NA
2.4346041353135984e-09	NC_044372.1	36624801	36625799	+	88.8527	998	Intergenic	Intergenic	-11873	LOC115709863	LOC115709863	XM_030638094	E3 ubiquitin-protein ligase RZFP34,	protein_coding	1.45913192	0.212214336	0.8068426	-1.629474096	0.081099205	0.489185623
2.4346041353135984e-09-2	NC_044372.1	52650201	52651999	+	88.8527	1798	Intergenic	Intergenic	-90507	LOC115710761	LOC115710761	XM_030639114	uncharacterized LOC115710761	protein_coding	NA	NA	NA	NA	NA	NA
4.4123475348573076e-08	NC_044372.1	28410801	28411799	+	88.8384	998	Intergenic	Intergenic	-15223	LOC115711252	LOC115711252	XM_030639591	uncharacterized LOC115711252	protein_coding	-0.594404185	1	1	-3.085009082	1.02238E-06	1.86961E-05
4.4123475348573076e-08-4	NC_044377.1	40941801	40942799	+	88.8384	998	Intergenic	Intergenic	-26492	LOC115725313	LOC115725313	XR_004013366	uncharacterized LOC115725313	lncRNA	NA	NA	NA	NA	NA	NA
4.4123475348573076e-08-3	NC_044373.1	70378401	70379399	+	88.8384	998	Intergenic	Intergenic	-23530	LOC115712210	LOC115712210	XM_030640460	LRR receptor-like serine/threonine-protein kinase HSL2	protein_coding	-0.583579497	1	1	0.177308782	1	1
4.4123475348573076e-08-2	NC_044373.1	33001	33999	+	88.8384	998	Intergenic	Intergenic	24280	LOC115714018	LOC115714018	XM_030642527	7-dehydrocholesterol reductase-like	protein_coding	0.424584863	1	1	0.493769659	1	1
8.135740261532248e-07-2	NC_044378.1	9714401	9715399	+	88.8168	998	exon	-exon (LOC115696992, exon 3 of 3)	1371	LOC115696992	LOC115696992	XM_030623888	50S ribosomal protein L14, chloroplastic-like	protein_coding	-2.054803383	0.163118391	0.655988458	-1.002469456	0.997462125	1
8.135740261532248e-07	NC_044378.1	8801401	8801999	+	88.8168	598	intron	-intron (LOC115697529, intron 4 of 4)	7996	LOC115697529	LOC115697529	XM_030624574	pentatricopeptide repeat-containing protein At2g01390,	protein_coding	0.174169817	1	1	-0.505839193	1	1
8.202582305636361e-18	NC_044379.1	45786001	45788999	+	88.7917	2998	Intergenic	Intergenic	87395	LOC115700161	LOC115700161	XM_030627721	uncharacterized LOC115700161	protein_coding	NA	NA	NA	NA	NA	NA
1.5399221151763067e-05-2	NC_044374.1	18548201	18548799	+	88.7805	598	Intergenic	Intergenic	-29499	LOC115716989	LOC115716989	XM_030645915	protein phosphatase inhibitor 2,	protein_coding	-0.380053931	1	1	-0.032755661	1	1
1.5399221151763067e-05-5	NW_022060487.1	811801	812399	+	88.7805	598	NA	NA	NA	NA			#N/A		NA	NA	NA	NA	NA	NA
1.5399221151763067e-05-4	NC_044375.1	65829801	65830399	+	88.7805	598	Intergenic	Intergenic	-39300	LOC115718535	LOC115718535	XM_030647336	transcription factor MYB46	protein_coding	2.59450947	0.067876965	0.320038974	-1.515083866	0.315666823	1
2.931736602509845e-09	NC_044375.1	10638801	10639799	+	88.7805	998	Intergenic	Intergenic	65020	LOC115719847	LOC115719847	XM_030649033	uncharacterized LOC115719847	protein_coding	NA	NA	NA	NA	NA	NA
1.5399221151763067e-05-3	NC_044374.1	82197401	82197999	+	88.7805	598	Intergenic	Intergenic	8616	LOC115716487	LOC115716487	XR_004011583	uncharacterized LOC115716487	lncRNA	-0.00395636	1	1	-0.577022415	1	1
1.5399221151763067e-05	NC_044373.1	27795001	27795799	+	88.7805	798	Intergenic	Intergenic	-40978	LOC115713299	LOC115713299	XM_030641776	uncharacterized LOC115713299	protein_coding	NA	NA	NA	NA	NA	NA
6.288126197065537e-13	NC_044373.1	27583201	27584799	+	88.7805	1598	Intergenic	Intergenic	36571	LOC115715052	LOC115715052	XM_030643844	cytochrome P450 71A1	protein_coding	-1.424385749	0.019679147	0.110968683	0.064069942	1	1
1.1086832744826634e-11	NC_044374.1	61952601	61954199	+	88.7622	1598	Intergenic	Intergenic	-73582	LOC115717886	LOC115717886	XM_030646856	uncharacterized mitochondrial protein AtMg00310-like	protein_coding	1.191161672	0.962318612	NA	1.742002822	0.854499492	NA
4.3108660641889114e-14	NC_044370.1	100154801	100157599	+	88.7512	2798	Intergenic	Intergenic	15744	LOC115699918	LOC115699918	XM_030627472	uncharacterized LOC115699918,	protein_coding	0.92091844	1	1	-0.103809892	1	1
1.9690884503964136e-10	NC_044376.1	56957801	56959199	+	88.7386	1398	TTS	-TTS (LOC115724231)	591	LOC115724231	LOC115724231	XR_004013033	small nucleolar RNA R71	snoRNA	NA	NA	NA	NA	NA	NA
7.559335535717334e-13	NW_022060454.1	874201	876199	+	88.7316	1998	Intergenic	Intergenic	371042	LOC115702127	LOC115702127	XM_030629586	#N/A	protein_coding	-1.214863418	0.74862229	1	-0.136444746	1	1
3.5304858900215038e-09	NC_044379.1	5075201	5076799	+	88.7069	1598	Intergenic	Intergenic	16787	LOC115700644	LOC115700644	XM_030628256	4-alpha-glucanotransferase DPE2,	protein_coding	-1.582321953	0.003173218	0.022692992	-0.182312279	1	1
9.821071530845547e-07-3	NC_044377.1	49238801	49239799	+	88.7069	998	Intergenic	Intergenic	-5987	LOC115695235	LOC115695235	XM_030622314	uncharacterized LOC115695235	protein_coding	NA	NA	NA	NA	NA	NA
0.00030480301706167816-2	NC_044378.1	16255401	16255799	+	88.7069	398	Intergenic	Intergenic	-13420	LOC115698403	LOC115698403	XR_004008152	small nucleolar RNA R71	snoRNA	NA	NA	NA	NA	NA	NA
9.821071530845547e-07-2	NC_044373.1	72749801	72750599	+	88.7069	798	Intergenic	Intergenic	-7087	LOC115713654	LOC115713654	XM_030642141	uncharacterized LOC115713654	protein_coding	NA	NA	NA	NA	NA	NA
0.00030480301706167816	NC_044376.1	30712401	30712799	+	88.7069	398	Intergenic	Intergenic	-6164	LOC115722212	LOC115722212	XM_030651357	probable LRR receptor-like serine/threonine-protein kinase At1g34110	protein_coding	2.22131136	NA	NA	1.261591787	NA	NA
9.821071530845547e-07	NC_044373.1	18838001	18838999	+	88.7069	998	Intergenic	Intergenic	-4668	LOC115714498	LOC115714498	XM_030643224	sucrose synthase 6	protein_coding	2.747377962	0.004828541	0.032926234	-1.29308571	0.528974065	1
1.420393665310911e-17	NW_022060381.1	3801	6799	+	88.6897	2998	Intergenic	Intergenic	3329	LOC115702035	LOC115702035	XR_004008780	#N/A	rRNA	NA	NA	NA	NA	NA	NA
9.087609060901596e-13-2	NC_044378.1	30980801	30982799	+	88.6821	1998	exon	-exon (LOC115697762, exon 1 of 1)	968	LOC115697762	LOC115697762	XM_030624886	cannabidiolic acid synthase-like	protein_coding	1.823912338	0.589117882	1	-7.327971256	7.35688E-11	2.24362E-09
9.087609060901596e-13	NC_044371.1	66695001	66696999	+	88.6821	1998	Intergenic	Intergenic	47489	TRNAA-UGC	TRNAA-UGC	TRNAA-UGC	#N/A	tRNA	NA	NA	NA	NA	NA	NA
6.411337719960557e-08	NC_044374.1	52694201	52695599	+	88.6621	1398	Intergenic	Intergenic	26662	LOC115716719	LOC115716719	XM_030645595	pre-mRNA-splicing factor ISY1 homolog	protein_coding	-0.023951423	1	1	0.405411532	1	1
6.411337719960557e-08-2	NC_044379.1	26080401	26081399	+	88.6621	998	Intergenic	Intergenic	-22716	LOC115698849	LOC115698849	XM_030626050	probable L-type lectin-domain containing receptor kinase S.5	protein_coding	0.754067762	NA	NA	2.638750921	NA	NA
1.8632686382062573e-05-4	NC_044376.1	24618401	24618999	+	88.6319	598	Intergenic	Intergenic	-59654	LOC115724149	LOC115724149	XM_030653613	NDR1/HIN1-like protein 6	protein_coding	-1.785501878	0.600318817	1	-4.100118216	0.038161666	0.262520179
1.8632686382062573e-05-5	NC_044379.1	7867001	7867999	+	88.6319	998	Intergenic	Intergenic	-3430	LOC115699001	LOC115699001	XR_004008276	uncharacterized LOC115699001,	lncRNA	0	1	NA	-2.503385706	0.7065612	NA
1.8632686382062573e-05-3	NC_044375.1	53011601	53012199	+	88.6319	598	Intergenic	Intergenic	-11344	LOC115718841	LOC115718841	XR_004012060	uncharacterized LOC115718841	lncRNA	0.656348792	1	1	0.276470506	1	1
1.8632686382062573e-05	NC_044370.1	33961601	33962399	+	88.6319	798	Intergenic	Intergenic	-41465	LOC115710185	LOC115710185	XM_030638531	elongation factor 1-delta 1	protein_coding	0.113427369	1	1	0.324216572	1	1
1.8632686382062573e-05-2	NC_044370.1	53635601	53636399	+	88.6319	798	promoter-TSS	-promoter-TSS (LOC115721607)	-1963	LOC115721607	LOC115721607	XM_030650746	cytochrome P450 714C2-like	protein_coding	NA	NA	NA	NA	NA	NA
8.24558080676066e-20	NC_044379.1	23858201	23862199	+	88.6319	3998	Intergenic	Intergenic	71337	LOC115701358	LOC115701358	XM_030629134	NAC domain-containing protein 2	protein_coding	0.02826433	1	1	-0.240688526	1	1
2.851488409576817e-10	NC_044373.1	29860601	29862199	+	88.6103	1598	intron	-intron (LOC115713314, intron 1 of 2)	8310	LOC115713314	LOC115713314	XM_030641793	uncharacterized LOC115713314	protein_coding	NA	NA	NA	NA	NA	NA
1.1856484390423669e-06	NC_044371.1	44406601	44407399	+	88.5939	798	Intergenic	Intergenic	-22321	LOC115706139	LOC115706139	XM_030633675	protein SMG9-like	protein_coding	0.136940782	1	1	0.263484235	1	1
1.1856484390423669e-06-2	NC_044378.1	6774401	6774799	+	88.5939	398	Intergenic	Intergenic	-8782	LOC115698021	LOC115698021	XM_030625202	signal recognition particle 19 kDa protein,	protein_coding	0.523922815	1	1	-0.051005525	1	1
7.728934052702669e-08	NC_044372.1	77376001	77376799	+	88.571	798	Intergenic	Intergenic	21786	LOC115710951	LOC115710951	XM_030639298	uncharacterized LOC115710951	protein_coding	NA	NA	NA	NA	NA	NA
1.8036607657904047e-60	NC_044375.1	96315601	96325599	+	88.571	9998	Intergenic	Intergenic	15106	LOC115719675	LOC115719675	XM_030648805	pre-rRNA-processing protein TSR2 homolog,	protein_coding	-0.205300225	1	1	0.279677658	1	1
5.120273173452171e-09	NC_044375.1	30161001	30161999	+	88.5556	998	Intergenic	Intergenic	5215	LOC115720013	LOC115720013	XM_030649181	F-box/LRR-repeat protein At3g26922-like	protein_coding	NA	NA	NA	NA	NA	NA
3.4315295172819817e-10	NC_044374.1	60113001	60114799	+	88.5445	1798	Intergenic	Intergenic	-342255	LOC115717877	LOC115717877	XM_030646848	uncharacterized LOC115717877	protein_coding	NA	NA	NA	NA	NA	NA
9.317772087403267e-08	NC_044375.1	43917401	43918599	+	88.4777	1198	Intergenic	Intergenic	-93610	LOC115720115	LOC115720115	XM_030649277	uncharacterized LOC115720115	protein_coding	NA	NA	NA	NA	NA	NA
2.2548562790235725e-05-5	NC_044375.1	32973201	32973999	+	88.4777	798	Intergenic	Intergenic	-2222	LOC115721508	LOC115721508	XR_004012527	small nucleolar RNA R71	snoRNA	NA	NA	NA	NA	NA	NA
2.2548562790235725e-05-4	NC_044374.1	22525001	22525599	+	88.4777	598	Intergenic	Intergenic	-61527	LOC115716624	LOC115716624	XM_030645459	phosphomevalonate kinase, peroxisomal	protein_coding	0.603874932	1	1	0.474148499	1	1
2.2548562790235725e-05-3	NC_044373.1	44698601	44699199	+	88.4777	598	Intergenic	Intergenic	-28311	LOC115715238	LOC115715238	XM_030644076	systemin receptor SR160	protein_coding	-0.113743373	1	1	0.08752038	1	1
2.2548562790235725e-05	NC_044370.1	8025801	8026799	+	88.4777	998	Intergenic	Intergenic	-7249	LOC115702492	LOC115702492	XM_030629932	pathogenesis-related protein 1A-like	protein_coding	NA	NA	NA	NA	NA	NA
9.317772087403267e-08-2	NC_044375.1	48004601	48005599	+	88.4777	998	TTS	-TTS (LOC115718795)	661	LOC115718795	LOC115718795	XR_004012039	uncharacterized LOC115718795	lncRNA	NA	NA	NA	NA	NA	NA
6.166555609060491e-09	NC_044374.1	39260601	39262199	+	88.4777	1598	Intergenic	Intergenic	54698	LOC115717747	LOC115717747	XM_030646726	zinc finger BED domain-containing protein DAYSLEEPER-like	protein_coding	NA	NA	NA	NA	NA	NA
2.2548562790235725e-05-2	NC_044371.1	11541601	11542399	+	88.4777	798	Intergenic	Intergenic	9986	LOC115705123	LOC115705123	XM_030632362	protein phosphatase 2C 37	protein_coding	-1.519092144	0.13277527	0.556307544	-0.493320728	1	1
2.2548562790235725e-05-6	NC_044375.1	83934601	83935399	+	88.4777	798	Intergenic	Intergenic	2942	LOC115720424	LOC115720424	XM_030649574	uncharacterized LOC115720424	protein_coding	NA	NA	NA	NA	NA	NA
6.166555609060491e-09-2	NC_044374.1	61950001	61951199	+	88.4777	1198	Intergenic	Intergenic	-70782	LOC115717886	LOC115717886	XM_030646856	uncharacterized mitochondrial protein AtMg00310-like	protein_coding	1.191161672	0.962318612	NA	1.742002822	0.854499492	NA
1.4314927915839993e-06	NC_044370.1	41798801	41799599	+	88.4777	798	Intergenic	Intergenic	-36253	LOC115710976	LOC115710976	XM_030639328	MORN repeat-containing protein 1	protein_coding	-0.015811642	1	1	-0.63247167	1	1
0.0003704206101985397	NC_044370.1	20132401	20132799	+	88.4777	398	Intergenic	Intergenic	-3450	LOC115717801	LOC115717801	XM_030646775	uncharacterized LOC115717801	protein_coding	NA	NA	NA	NA	NA	NA
1.4314927915839993e-06-3	NC_044374.1	53654001	53654799	+	88.4777	798	Intergenic	Intergenic	22078	LOC115718260	LOC115718260	XR_004011843	small nucleolar RNA R71	snoRNA	NA	NA	NA	NA	NA	NA
1.4314927915839993e-06-4	NC_044375.1	29288801	29289399	+	88.4777	598	Intergenic	Intergenic	-4320	LOC115720967	LOC115720967	XM_030650189	pathogenesis-related protein PR-4	protein_coding	-3.460710356	NA	NA	-2.21231248	NA	NA
0.0003704206101985397-4	NC_044374.1	42287001	42287399	+	88.4777	398	Intergenic	Intergenic	14196	LOC115717769	LOC115717769	XM_030646744	uncharacterized LOC115717769	protein_coding	NA	NA	NA	NA	NA	NA
0.0003704206101985397-6	NC_044378.1	52006201	52006599	+	88.4777	398	Intergenic	Intergenic	11554	LOC115696643	LOC115696643	XM_030623535	uncharacterized LOC115696643	protein_coding	NA	NA	NA	NA	NA	NA
0.0003704206101985397-2	NC_044371.1	47379201	47379599	+	88.4777	398	Intergenic	Intergenic	-9848	LOC115705639	LOC115705639	XM_030633040	uncharacterized LOC115705639	protein_coding	-2.26303814	8.61666E-08	1.45808E-06	-0.669819726	1	1
1.4314927915839993e-06-2	NC_044372.1	81148001	81148999	+	88.4777	998	Intergenic	Intergenic	-36020	LOC115711301	LOC115711301	XM_030639638	protein PALE CRESS, chloroplastic	protein_coding	-0.561070741	1	1	0.602909889	1	1
0.0003704206101985397-5	NC_044374.1	49405201	49405599	+	88.4777	398	Intergenic	Intergenic	-21702	LOC115717816	LOC115717816	XM_030646787	zinc finger MYM-type protein 1-like	protein_coding	NA	NA	NA	NA	NA	NA
0.0003704206101985397-3	NC_044373.1	20809401	20809799	+	88.4777	398	intron	-intron (LOC115713234, intron 6 of 6)	15594	LOC115713234	LOC115713234	XM_030641717	uncharacterized LOC115713234	protein_coding	NA	NA	NA	NA	NA	NA
3.355958756618261e-11	NC_044379.1	21673201	21674599	+	88.4184	1398	Intergenic	Intergenic	-64813	LOC115700995	LOC115700995	XR_004008478	uncharacterized LOC115700995	lncRNA	0	1	NA	-0.998328082	1	NA
7.42687149602783e-09	NC_044370.1	9887401	9888199	+	88.3984	798	Intergenic	Intergenic	-15119	LOC115699128	LOC115699128	XM_030626400	transcription factor MYB78	protein_coding	-2.87575971	1.32734E-05	0.00015858	-3.395638924	2.36446E-08	5.3935E-07
7.42687149602783e-09-2	NC_044377.1	29072201	29073199	+	88.3984	998	Intergenic	Intergenic	81704	LOC115725518	LOC115725518	XM_030655070	GDP-L-galactose phosphorylase 2	protein_coding	-1.427261452	0.17118779	0.682868412	0.227099129	1	1
1.1233795837860484e-07	NC_044373.1	41270601	41271799	+	88.3823	1198	Intergenic	Intergenic	8457	LOC115713425	LOC115713425	XM_030641905	protein FAR1-RELATED SEQUENCE 5-like	protein_coding	NA	NA	NA	NA	NA	NA
1.7284607257749797e-06	NC_044379.1	9211401	9212199	+	88.3581	798	Intergenic	Intergenic	-297980	LOC115699809	LOC115699809	XM_030627352	uncharacterized LOC115699809	protein_coding	NA	NA	NA	NA	NA	NA
4.26818217937596e-19	NC_044377.1	43310801	43313999	+	88.3501	3198	Intergenic	Intergenic	-252181	LOC115695201	LOC115695201	XM_030622286	uncharacterized LOC115695201	protein_coding	NA	NA	NA	NA	NA	NA
5.98121019523518e-10	NC_044376.1	18692401	18693599	+	88.3408	1198	Intergenic	Intergenic	-26669	LOC115724252	LOC115724252	XR_004013052	small nucleolar RNA R71	snoRNA	NA	NA	NA	NA	NA	NA
2.4899006518756317e-21	NC_044376.1	29547001	29550599	+	88.3367	3598	Intergenic	Intergenic	-12435	LOC115723150	LOC115723150	XM_030652585	probable prefoldin subunit 5	protein_coding	-0.064301503	1	1	0.369637557	1	1
2.729174693663663e-05	NC_044373.1	77638001	77638599	+	88.3175	598	Intergenic	Intergenic	6372	LOC115714065	LOC115714065	XM_030642598	60S ribosomal protein L19-3	protein_coding	0.183636483	1	1	0.930759048	1	1
2.729174693663663e-05-2	NC_044378.1	18206601	18207199	+	88.3175	598	Intergenic	Intergenic	18613	LOC115696402	LOC115696402	XM_030623303	uncharacterized LOC115696402	protein_coding	NA	NA	NA	NA	NA	NA
1.3544512300432522e-07	NC_044377.1	52813001	52813999	+	88.2847	998	Intergenic	Intergenic	37610	LOC115695262	LOC115695262	XM_030622340	uncharacterized LOC115695262	protein_coding	NA	NA	NA	NA	NA	NA
2.08721876142826e-06-2	NC_044379.1	35247201	35248199	+	88.235	998	Intergenic	Intergenic	10808	LOC115699327	LOC115699327	XM_030626678	allene oxide cyclase, chloroplastic	protein_coding	1.909984561	NA	NA	1.149162612	NA	NA
2.08721876142826e-06	NC_044375.1	90730001	90730799	+	88.235	798	Intergenic	Intergenic	-15043	LOC115721204	LOC115721204	XM_030650463	nicotianamine synthase	protein_coding	-1.501077601	0.202643353	0.776356559	2.819484321	3.88953E-06	6.56839E-05
4.767717192780291e-12	NC_044377.1	42836801	42838599	+	88.2072	1798	Intergenic	Intergenic	51273	LOC115695200	LOC115695200	XM_030622285	uncharacterized LOC115695200	protein_coding	NA	NA	NA	NA	NA	NA
8.663667223525123e-10	NC_044377.1	67997001	67997799	+	88.1992	798	intron	-intron (LOC115695403, intron 4 of 4)	7231	LOC115696024	LOC115696024	XR_004007625	U4 spliceosomal RNA	snRNA	0.195427959	1	1	-0.859179719	1	1
1.633138706990814e-07	NC_044375.1	29155201	29156199	+	88.1848	998	Intergenic	Intergenic	-28083	LOC115721333	LOC115721333	XM_030650606	uncharacterized LOC115721333	protein_coding	0.192977259	1	1	-2.58734407	0.095093427	0.558169427
7.024333696311916e-11	NC_044372.1	59845401	59846999	+	88.1721	1598	Intergenic	Intergenic	-64172	LOC115711352	LOC115711352	XM_030639689	protein SRC2	protein_coding	0.780606026	1	1	0.182867395	1	1
1.2977177210932627e-08	NC_044377.1	52086201	52087599	+	88.151	1398	Intergenic	Intergenic	31240	LOC115696061	LOC115696061	XR_004007659	small nucleolar RNA R71	snoRNA	NA	NA	NA	NA	NA	NA
3.3038127169149524e-05-3	NC_044372.1	81427601	81427999	+	88.151	398	Intergenic	Intergenic	3784	LOC115711518	LOC115711518	XM_030639871	protein SODIUM POTASSIUM ROOT DEFECTIVE 2	protein_coding	-2.116540829	1.20704E-06	1.69985E-05	-1.109237656	0.635315444	1
3.3038127169149524e-05-4	NC_044373.1	56091801	56093199	+	88.151	1398	Intergenic	Intergenic	7270	LOC115714869	LOC115714869	XM_030643631	uncharacterized LOC115714869	protein_coding	1.762529335	0.018459348	0.105201319	1.156116054	0.604641036	1
3.3038127169149524e-05-5	NC_044377.1	2184201	2184799	+	88.151	598	intron	-intron (LOC115724988, intron 1 of 7)	-2042	LOC115724989	LOC115724989	XM_030654379	uncharacterized LOC115724989	protein_coding	NA	NA	NA	NA	NA	NA
3.3038127169149524e-05	NC_044371.1	65095001	65095599	+	88.151	598	intron	-intron (LOC115705819, intron 2 of 9)	13846	LOC115705819	LOC115705819	XM_030633262	cytosolic endo-beta-N-acetylglucosaminidase 1,	protein_coding	-0.788540236	1	1	0.517080098	1	1
3.3038127169149524e-05-2	NC_044372.1	70454401	70454999	+	88.151	598	Intergenic	Intergenic	-11399	LOC115711477	LOC115711477	XM_030639817	PAN domain-containing protein At5g03700	protein_coding	0.554489485	1	1	0.288799046	1	1
4.701998116914809e-13	NC_044373.1	43467801	43469999	+	88.1339	2198	Intergenic	Intergenic	222907	LOC115713438	LOC115713438	XM_030641921	uncharacterized LOC115713438	protein_coding	0.374376113	1	NA	0.925217262	1	NA
2.520667438669187e-06-3	NC_044374.1	45859601	45860399	+	88.1083	798	Intergenic	Intergenic	-64374	LOC115717791	LOC115717791	XM_030646765	uncharacterized LOC115717791	protein_coding	NA	NA	NA	NA	NA	NA
2.520667438669187e-06-5	NW_022060393.1	25601	26399	+	88.1083	798	NA	NA	NA	NA			#N/A		NA	NA	NA	NA	NA	NA
2.520667438669187e-06-2	NC_044374.1	396001	396799	+	88.1083	798	Intergenic	Intergenic	-14298	LOC115716501	LOC115716501	XM_030645312	calmodulin-interacting protein 111	protein_coding	-0.02537704	1	1	0.116443958	1	1
2.520667438669187e-06-4	NC_044376.1	33199401	33200399	+	88.1083	998	Intergenic	Intergenic	-22809	LOC115722211	LOC115722211	XM_030651356	uncharacterized LOC115722211	protein_coding	0.231517896	1	1	0.065877151	1	1
2.520667438669187e-06	NC_044370.1	74509001	74509799	+	88.1083	798	Intergenic	Intergenic	-9908	LOC115714431	LOC115714431	XM_030643149	cytochrome P450 81Q32,	protein_coding	-3.429987273	0.190808323	0.743093272	-5.145005009	0.017327673	0.133877066
1.9692737608549576e-07	NC_044373.1	82603201	82604799	+	88.0825	1598	promoter-TSS	-promoter-TSS (LOC115715442)	-1052	LOC115715442	LOC115715442	XR_004011313	small nucleolar RNA R71	snoRNA	NA	NA	NA	NA	NA	NA
1.9692737608549576e-07-2	NC_044375.1	35269801	35270999	+	88.0825	1198	Intergenic	Intergenic	-19767	LOC115721259	LOC115721259	XM_030650518	transcription factor bHLH96	protein_coding	6.797037809	0.000435093	0.003891944	3.876482999	0.018956058	0.144936422
1.5631497886560937e-08	NC_044370.1	76298801	76300199	+	88.0652	1398	Intergenic	Intergenic	-43462	LOC115714749	LOC115714749	XM_030643510	putative receptor protein kinase ZmPK1	protein_coding	-0.431531399	1	1	1.165149896	0.821867147	1
3.0444113050194625e-06-2	NC_044374.1	19545801	19546599	+	87.9777	798	Intergenic	Intergenic	-83145	LOC115715760	LOC115715760	XM_030644431	metalloendoproteinase 4-MMP	protein_coding	3.356736761	0.056516985	0.275114206	-0.244475174	1	1
3.0444113050194625e-06-9	NC_044377.1	22967001	22967799	+	87.9777	798	Intergenic	Intergenic	-31461	LOC115695057	LOC115695057	XM_030622155	uncharacterized LOC115695057	protein_coding	-1.549169232	0.892939793	NA	0	1	NA
3.0444113050194625e-06-6	NC_044375.1	21734801	21735799	+	87.9777	998	Intergenic	Intergenic	-87030	LOC115721373	LOC115721373	XM_030650657	membrane-associated 30 kDa protein, chloroplastic	protein_coding	0.289853143	1	1	0.346055031	1	1
3.0444113050194625e-06-12	NC_044378.1	28419001	28419799	+	87.9777	798	Intergenic	Intergenic	-17162	LOC115697081	LOC115697081	XM_030623991	pathogenesis-related genes transcriptional activator PTI5	protein_coding	0.75598209	1	1	1.818339014	0.160492552	0.856309077
4.0001271851583086e-05-2	NC_044371.1	51846601	51847199	+	87.9777	598	Intergenic	Intergenic	17403	LOC115705418	LOC115705418	XR_004009460	uncharacterized LOC115705418	lncRNA	NA	NA	NA	NA	NA	NA
3.0444113050194625e-06-11	NC_044378.1	25395001	25395799	+	87.9777	798	Intergenic	Intergenic	33235	LOC115696451	LOC115696451	XM_030623352	uncharacterized mitochondrial protein AtMg00810-like	protein_coding	NA	NA	NA	NA	NA	NA
1.8829370299633437e-08	NC_044377.1	72423001	72424199	+	87.9777	1198	Intergenic	Intergenic	-21146	LOC115725110	LOC115725110	XM_030654539	methyl-CpG-binding domain-containing protein 11,	protein_coding	-0.274900927	1	1	-0.353332413	1	1
4.0001271851583086e-05-6	NC_044379.1	44463201	44464199	+	87.9777	998	Intergenic	Intergenic	-41873	LOC115699084	LOC115699084	XM_030626305	uncharacterized LOC115699084	protein_coding	0.799551152	1	1	0.044800331	1	1
3.0444113050194625e-06-7	NC_044376.1	8834401	8835199	+	87.9777	798	Intergenic	Intergenic	-12146	LOC115724386	LOC115724386	XR_004013179	small nucleolar RNA R71	snoRNA	NA	NA	NA	NA	NA	NA
3.0444113050194625e-06-3	NC_044374.1	31474001	31474799	+	87.9777	798	Intergenic	Intergenic	92345	LOC115718148	LOC115718148	XR_004011767	uncharacterized LOC115718148	lncRNA	NA	NA	NA	NA	NA	NA
3.0444113050194625e-06-4	NC_044374.1	39566601	39567199	+	87.9777	598	Intergenic	Intergenic	80751	LOC115717751	LOC115717751	XM_030646729	L10-interacting MYB domain-containing protein-like	protein_coding	NA	NA	NA	NA	NA	NA
3.0444113050194625e-06-5	NC_044374.1	58275601	58276399	+	87.9777	798	Intergenic	Intergenic	-15138	LOC115717871	LOC115717871	XM_030646842	cingulin-like	protein_coding	NA	NA	NA	NA	NA	NA
3.0444113050194625e-06-10	NC_044377.1	35944801	35945599	+	87.9777	798	Intergenic	Intergenic	15854	LOC115695129	LOC115695129	XM_030622220	uncharacterized LOC115695129	protein_coding	NA	NA	NA	NA	NA	NA
3.0444113050194625e-06	NC_044371.1	5229601	5230599	+	87.9777	998	Intergenic	Intergenic	-16635	LOC115704108	LOC115704108	XM_030631328	strigolactone esterase D14	protein_coding	-5.945420917	9.24317E-06	0.00011339	-5.720061386	2.22677E-05	0.000331184
4.0001271851583086e-05-3	NC_044371.1	70177201	70177999	+	87.9777	798	Intergenic	Intergenic	2673	LOC115708381	LOC115708381	XR_004009881	small nucleolar RNA R71	snoRNA	NA	NA	NA	NA	NA	NA
3.0444113050194625e-06-8	NC_044377.1	12210601	12211399	+	87.9777	798	TTS	-TTS (LOC115696156)	184	LOC115696156	LOC115696156	XR_004007747	small nucleolar RNA R71	snoRNA	NA	NA	NA	NA	NA	NA
4.0001271851583086e-05-5	NC_044379.1	26088601	26089199	+	87.9777	598	Intergenic	Intergenic	-30716	LOC115698849	LOC115698849	XM_030626050	probable L-type lectin-domain containing receptor kinase S.5	protein_coding	0.754067762	NA	NA	2.638750921	NA	NA
4.0001271851583086e-05-4	NC_044377.1	65721201	65721799	+	87.9777	598	Intergenic	Intergenic	-58564	LOC115724893	LOC115724893	XM_030654267	uncharacterized LOC115724893, transcript variant X8	protein_coding	-0.906348655	1	1	-0.696319392	1	1
4.0001271851583086e-05	NC_044370.1	27685401	27685799	+	87.9777	398	Intergenic	Intergenic	-7210	LOC115719313	LOC115719313	XM_030648301	uncharacterized LOC115719313	protein_coding	NA	NA	NA	NA	NA	NA
3.0444113050194625e-06-13	NC_044379.1	6673001	6673799	+	87.9777	798	Intergenic	Intergenic	35926	LOC115699780	LOC115699780	XM_030627325	uncharacterized LOC115699780	protein_coding	-1.549169232	0.892939793	NA	0	1	NA
1.1977490988063911e-11-2	NC_044377.1	75571001	75572599	+	87.9183	1598	Intergenic	Intergenic	-12552	LOC115695762	LOC115695762	XR_004007546	uncharacterized LOC115695762,	lncRNA	-0.122050378	1	1	-0.089879494	1	1
1.1977490988063911e-11	NC_044372.1	68994001	68995599	+	87.9183	1598	Intergenic	Intergenic	13388	LOC115710886	LOC115710886	XM_030639238	uncharacterized LOC115710886	protein_coding	NA	NA	NA	NA	NA	NA
2.6950979098142856e-22	NC_044370.1	36038601	36042199	+	87.8931	3598	Intergenic	Intergenic	-88548	LOC115720095	LOC115720095	XM_030649261	uncharacterized LOC115720095	protein_coding	NA	NA	NA	NA	NA	NA
2.86380895983203e-07	NC_044377.1	29229201	29230199	+	87.8703	998	promoter-TSS	-promoter-TSS (LOC115694775)	-1934	LOC115694775	LOC115694775	XM_030621862	COBRA-like protein 10,	protein_coding	0.188431048	1	1	-2.978716384	0.039142384	0.267766081
3.677328294881724e-06	NC_044375.1	65982201	65982999	+	87.843	798	Intergenic	Intergenic	8060	LOC115720263	LOC115720263	XM_030649418	uncharacterized LOC115720263	protein_coding	NA	NA	NA	NA	NA	NA
6.609248996942572e-18	NC_044378.1	66926201	66928999	+	87.8339	2798	Intergenic	Intergenic	-9612	LOC115696871	LOC115696871	XM_030623757	pyruvate dehydrogenase E1 component subunit beta-3, chloroplastic	protein_coding	-0.57890578	1	1	0.17286403	1	1
4.844057694904058e-05	NC_044373.1	1510001	1510799	+	87.7972	798	Intergenic	Intergenic	-5801	LOC115714722	LOC115714722	XM_030643480	endonuclease 2	protein_coding	1.623411379	0.215218832	0.816006233	-0.12230467	1	1
4.844057694904058e-05-4	NC_044378.1	31821401	31821999	+	87.7972	598	Intergenic	Intergenic	-2896	LOC115696493	LOC115696493	XM_030623393	uncharacterized LOC115696493	protein_coding	NA	NA	NA	NA	NA	NA
4.844057694904058e-05-2	NC_044373.1	65677601	65678199	+	87.7972	598	Intergenic	Intergenic	-31103	LOC115713579	LOC115713579	XM_030642067	uncharacterized LOC115713579	protein_coding	NA	NA	NA	NA	NA	NA
4.844057694904058e-05-3	NC_044375.1	28714201	28714999	+	87.7972	798	Intergenic	Intergenic	-31160	LOC115720601	LOC115720601	XM_030649752	uncharacterized protein At2g34160	protein_coding	1.927295108	0.343329702	1	0.935191381	1	1
1.7314706169897126e-11-2	NC_044375.1	58556401	58557999	+	87.7972	1598	Intergenic	Intergenic	-20097	LOC115720224	LOC115720224	XM_030649381	uncharacterized LOC115720224	protein_coding	NA	NA	NA	NA	NA	NA
1.7314706169897126e-11	NC_044372.1	70451801	70453199	+	87.7972	1398	Intergenic	Intergenic	-9199	LOC115711477	LOC115711477	XM_030639817	PAN domain-containing protein At5g03700	protein_coding	0.554489485	1	1	0.288799046	1	1
3.453822207302426e-07-3	NC_044376.1	6164401	6165399	+	87.7602	998	Intergenic	Intergenic	59003	LOC115723511	LOC115723511	XM_030653007	#N/A	protein_coding	-1.066256768	0.785887335	1	-0.077102448	1	1
3.453822207302426e-07-2	NC_044371.1	49195601	49196399	+	87.7602	798	Intergenic	Intergenic	-10384	LOC115704774	LOC115704774	XM_030631978	uncharacterized LOC115704774	protein_coding	-0.390697495	1	1	-3.380946063	0.017265184	0.133522797
3.453822207302426e-07-4	NC_044378.1	47415401	47416399	+	87.7602	998	Intergenic	Intergenic	49723	LOC115696613	LOC115696613	XM_030623507	uncharacterized LOC115696613	protein_coding	NA	NA	NA	NA	NA	NA
3.453822207302426e-07	NC_044370.1	49744801	49745799	+	87.7602	998	Intergenic	Intergenic	-85255	LOC115711897	LOC115711897	XM_030640111	outer envelope pore protein 21, chloroplastic	protein_coding	-0.572535714	1	1	0.309245115	1	1
2.6343048003931583e-09	NC_044370.1	47002401	47003999	+	87.7443	1598	Intergenic	Intergenic	-91888	LOC115720976	LOC115720976	XM_030650204	uncharacterized LOC115720976	protein_coding	NA	NA	NA	NA	NA	NA
4.442259651058142e-06-4	NC_044375.1	66722801	66723399	+	87.7042	598	Intergenic	Intergenic	-4338	LOC115720280	LOC115720280	XM_030649435	uncharacterized LOC115720280	protein_coding	NA	NA	NA	NA	NA	NA
2.559872554934502e-10	NC_044375.1	23898801	23899799	+	87.7042	998	Intergenic	Intergenic	12905	LOC115720897	LOC115720897	XM_030650101	ubiquitin recognition factor in ER-associated degradation protein 1	protein_coding	-1.427968376	0.205810043	0.786381727	0.130947172	1	1
4.442259651058142e-06	NC_044370.1	27749001	27749799	+	87.7042	798	intron	-intron (LOC115708781, intron 3 of 4)	-15210	LOC115708763	LOC115708763	XM_030636779	tryptophan aminotransferase-related protein 3	protein_coding	NA	NA	NA	NA	NA	NA
4.442259651058142e-06-2	NC_044370.1	70237401	70238199	+	87.7042	798	Intergenic	Intergenic	19923	LOC115713788	LOC115713788	XM_030642272	catalase-2	protein_coding	-4.457402676	5.59227E-67	4.47918E-64	-2.653592884	1.35632E-16	6.97333E-15
2.559872554934502e-10-2	NC_044377.1	74783801	74785399	+	87.7042	1598	Intergenic	Intergenic	5026	LOC115695486	LOC115695486	XM_030622550	circumsporozoite protein-like	protein_coding	NA	NA	NA	NA	NA	NA
4.442259651058142e-06-5	NC_044379.1	48207601	48208399	+	87.7042	798	Intergenic	Intergenic	22788	LOC115699746	LOC115699746	XM_030627284	uncharacterized LOC115699746,	protein_coding	-2.820851813	4.47122E-16	2.04644E-14	-2.375545413	8.30259E-10	2.25537E-08
4.442259651058142e-06-3	NC_044375.1	18104601	18105399	+	87.7042	798	Intergenic	Intergenic	-4480	LOC115721068	LOC115721068	XM_030650312	nuclear intron maturase 3, mitochondrial	protein_coding	-0.127210002	1	1	-0.309009193	1	1
7.467272460951882e-64	NC_044370.1	801	12999	+	87.6759	12198	Intergenic	Intergenic	-6678	LOC115702590	LOC115702590	XM_030630002	kinesin-like protein KIN-14E,	protein_coding	-0.051827712	1	1	0.066685462	1	1
3.1709852968422944e-09-2	NW_022060487.1	532201	533799	+	87.6637	1598	NA	NA	NA	NA			#N/A		NA	NA	NA	NA	NA	NA
3.1709852968422944e-09	NC_044373.1	47537401	47538999	+	87.6637	1598	Intergenic	Intergenic	-17455	LOC115714867	LOC115714867	XM_030643630	mulatexin-like	protein_coding	3.089691166	0.0289923	0.155573407	-6.272277177	5.4484E-29	7.48298E-27
2.4599838316748455e-12	NC_044379.1	12016601	12018399	+	87.6474	1798	Intergenic	Intergenic	-10646	LOC115701013	LOC115701013	XR_004008486	uncharacterized LOC115701013	lncRNA	0.374388901	1	1	-4.710386711	0.039441045	0.269581127
4.1656353377028374e-07	NC_044377.1	19025601	19026399	+	87.6474	798	Intergenic	Intergenic	-54965	LOC115724920	LOC115724920	XM_030654293	uncharacterized LOC115724920	protein_coding	-7.408473201	7.12727E-06	8.85634E-05	-8.051947013	7.33007E-07	1.3677E-05
3.0794547096372636e-10	NC_044373.1	64251601	64252599	+	87.6331	998	Intergenic	Intergenic	36243	LOC115712654	LOC115712654	XM_030640962	FT-interacting protein 1	protein_coding	3.740361361	0.053965025	0.264905764	-1.398863199	0.626592636	1
3.0794547096372636e-10-2	NC_044379.1	3663201	3665199	+	87.6331	1998	Intergenic	Intergenic	-37113	LOC115699501	LOC115699501	XM_030626950	protein TPR3,	protein_coding	0.366502746	1	1	-0.220858208	1	1
5.867119581331045e-05-2	NC_044372.1	70974201	70974799	+	87.6092	598	Intergenic	Intergenic	55503	LOC115708858	LOC115708858	XM_030636875	uncharacterized LOC115708858	protein_coding	-0.566713965	1	1	-2.832541318	5.86116E-13	2.21798E-11
5.867119581331045e-05	NC_044372.1	8921401	8921999	+	87.6092	598	Intergenic	Intergenic	-3083	LOC115709949	LOC115709949	XM_030638219	CASP-like protein 4A3	protein_coding	0.613225913	1	1	-0.057189929	1	1
5.867119581331045e-05-4	NC_044379.1	38396001	38396599	+	87.6092	598	Intergenic	Intergenic	8995	LOC115700079	LOC115700079	XM_030627635	uncharacterized mitochondrial protein AtMg00310-like	protein_coding	NA	NA	NA	NA	NA	NA
5.867119581331045e-05-3	NC_044374.1	2286601	2287199	+	87.6092	598	Intergenic	Intergenic	-5164	LOC115715900	LOC115715900	XM_030644577	receptor-like protein EIX2	protein_coding	0	1	NA	-1.957198977	0.812367382	NA
2.388021248798473e-15	NC_044377.1	79067801	79071199	+	87.5944	3398	intron	-intron (LOC115694757, intron 2 of 9)	10228	LOC115694757	LOC115694757	XM_030621847	disease resistance protein At4g27190-like,	protein_coding	-1.515744232	0.194302602	0.751968407	0.114712317	1	1
3.817090913092794e-09-2	NC_044378.1	48453601	48454999	+	87.5816	1398	Intergenic	Intergenic	-22587	LOC115696617	LOC115696617	XM_030623511	uncharacterized LOC115696617	protein_coding	NA	NA	NA	NA	NA	NA
3.817090913092794e-09	NC_044377.1	58960801	58961999	+	87.5816	1198	Intergenic	Intergenic	-53497	LOC115695307	LOC115695307	XM_030622382	zinc finger MYM-type protein 1-like	protein_coding	NA	NA	NA	NA	NA	NA
5.366846071628416e-06	NC_044376.1	56971801	56972599	+	87.5609	798	Intergenic	Intergenic	14291	LOC115724231	LOC115724231	XR_004013033	small nucleolar RNA R71	snoRNA	NA	NA	NA	NA	NA	NA
5.366846071628416e-06-2	NC_044377.1	43580801	43581599	+	87.5609	798	Intergenic	Intergenic	-520981	LOC115695201	LOC115695201	XM_030622286	uncharacterized LOC115695201	protein_coding	NA	NA	NA	NA	NA	NA
3.7045520417704103e-10	NC_044370.1	74640401	74641799	+	87.5609	1398	Intergenic	Intergenic	35029	LOC115724679	LOC115724679	XM_030654022	uncharacterized protein YuxK-like	protein_coding	0.08349261	1	1	0.425384394	1	1
5.366846071628416e-06-3	NC_044378.1	38104601	38105199	+	87.5609	598	Intergenic	Intergenic	36815	LOC115698027	LOC115698027	XR_004008021	uncharacterized LOC115698027	lncRNA	0	1	NA	-3.914125128	0.382835663	1
6.060688947452601e-07-3	NC_044374.1	77994401	77995599	+	87.413	1198	Intergenic	Intergenic	-21831	LOC115715947	LOC115715947	XM_030644627	phospholipase A1-IIgamma	protein_coding	0	1	1	-7.149827338	3.38336E-05	0.000489677
7.107614668422935e-05-2	NC_044372.1	52743601	52744199	+	87.413	598	Intergenic	Intergenic	86879	LOC115710762	LOC115710762	XM_030639115	uncharacterized LOC115710762	protein_coding	NA	NA	NA	NA	NA	NA
7.107614668422935e-05	NC_044372.1	27420201	27420799	+	87.413	598	Intergenic	Intergenic	-45316	LOC115708906	LOC115708906	XM_030636931	remorin,	protein_coding	2.415407799	0.001693443	0.013115654	2.683460767	0.000166218	0.002106141
7.107614668422935e-05-4	NC_044378.1	34114601	34115199	+	87.413	598	Intergenic	Intergenic	19761	LOC115697126	LOC115697126	XM_030624041	cannabidiolic acid synthase-like 1	protein_coding	1.429165042	0.735587649	1	0.951889574	1	1
7.107614668422935e-05-3	NC_044375.1	9143001	9143599	+	87.413	598	Intergenic	Intergenic	-3396	LOC115718992	LOC115718992	XM_030647825	phytolongin Phyl2.2	protein_coding	1.016722186	0.89923349	1	0.39290253	1	1
6.060688947452601e-07-2	NC_044373.1	43361401	43362399	+	87.413	998	Intergenic	Intergenic	115907	LOC115713438	LOC115713438	XM_030641921	uncharacterized LOC115713438	protein_coding	0.374376113	1	NA	0.925217262	1	NA
6.484541279701609e-06	NC_044372.1	93378601	93379399	+	87.413	798	Intergenic	Intergenic	-7968	LOC115710253	LOC115710253	XM_030638608	#N/A	protein_coding	0.256898437	1	1	0.316932916	1	1
4.924146847543521e-18	NC_044373.1	45801	48599	+	87.413	2798	Intergenic	Intergenic	10580	LOC115714018	LOC115714018	XM_030642527	7-dehydrocholesterol reductase-like	protein_coding	0.424584863	1	1	0.493769659	1	1
6.060688947452601e-07	NC_044372.1	90835201	90836199	+	87.413	998	Intergenic	Intergenic	7833	LOC115711133	LOC115711133	XM_030639469	agamous-like MADS-box protein AGL80	protein_coding	NA	NA	NA	NA	NA	NA
7.107614668422935e-05-5	NW_022060476.1	958201	958799	+	87.413	598	Intergenic	Intergenic	226700	LOC115702188	LOC115702188	XM_030629636	#N/A	protein_coding	NA	NA	NA	NA	NA	NA
6.450007815579133e-10	NC_044378.1	57635801	57637199	+	87.3372	1398	Intergenic	Intergenic	161647	LOC115696229	LOC115696229	XR_004007773	uncharacterized LOC115696229	lncRNA	0	1	NA	-0.998328082	1	NA
6.65899916972445e-09	NC_044378.1	52957601	52958799	+	87.3263	1198	Intergenic	Intergenic	105597	LOC115697318	LOC115697318	XM_030624265	ethylene-responsive transcription factor 4	protein_coding	1.50171019	0.042977562	0.217696355	-0.779576669	1	1
6.936144812440442e-08	NC_044373.1	22278001	22278999	+	87.3117	998	Intergenic	Intergenic	13190	LOC115713245	LOC115713245	XM_030641728	uncharacterized LOC115713245	protein_coding	NA	NA	NA	NA	NA	NA
7.311098088229906e-07-3	NC_044377.1	710601	711399	+	87.2912	798	Intergenic	Intergenic	-5713	LOC115694679	LOC115694679	XR_004007436	uncharacterized LOC115694679	lncRNA	0	1	NA	-0.998328082	1	NA
7.311098088229906e-07-4	NC_044378.1	31255601	31256599	+	87.2912	998	Intergenic	Intergenic	-31281	LOC115697279	LOC115697279	XM_030624218	UDP-arabinose 4-epimerase 1,	protein_coding	-0.153630174	1	1	-0.180020007	1	1
7.311098088229906e-07	NC_044372.1	27424001	27424799	+	87.2912	798	Intergenic	Intergenic	-44845	LOC115709941	LOC115709941	XM_030638208	DNA annealing helicase and endonuclease ZRANB3,	protein_coding	0.196225355	1	1	0.539881024	1	1
7.311098088229906e-07-2	NC_044374.1	38866001	38866999	+	87.2912	998	Intergenic	Intergenic	17681	LOC115716892	LOC115716892	XM_030645806	phosphatidylinositol glycan anchor biosynthesis class U protein,	protein_coding	0.228458194	1	1	0.631078993	1	1
7.835840922582137e-06-2	NC_044374.1	45844401	45845199	+	87.2603	798	Intergenic	Intergenic	-49174	LOC115717791	LOC115717791	XM_030646765	uncharacterized LOC115717791	protein_coding	NA	NA	NA	NA	NA	NA
7.835840922582137e-06	NC_044373.1	60419201	60419999	+	87.2603	798	Intergenic	Intergenic	64145	LOC115713549	LOC115713549	XM_030642033	uncharacterized LOC115713549	protein_coding	2.434006535	0.717697619	NA	2.984847685	0.61678356	NA
7.835840922582137e-06-3	NC_044378.1	22266401	22267199	+	87.2603	798	Intergenic	Intergenic	-31026	LOC115696217	LOC115696217	XM_030623120	leucine-rich repeat protein 1	protein_coding	0.768025782	1	1	0.393263703	1	1
9.095617005200756e-11	NC_044376.1	5873001	5874199	+	87.2082	1198	promoter-TSS	-promoter-TSS (LOC115722016)	-1515	LOC115722016	LOC115722016	XR_004012751	uncharacterized LOC115722016	lncRNA	2.669890194	0.000215114	0.002049126	3.912674144	5.12236E-10	1.42497E-08
8.612108282130667e-05-2	NW_022060486.1	6001	6599	+	87.2082	598	Intergenic	Intergenic	-9350	LOC115702202	LOC115702202	XM_030629654	#N/A	protein_coding	0.11152295	1	1	-0.024951807	1	1
8.357588848908782e-08	NC_044377.1	49090801	49092199	+	87.2082	1398	Intergenic	Intergenic	14394	LOC115694809	LOC115694809	XM_030621901	DEAD-box ATP-dependent RNA helicase 10	protein_coding	0.054831471	1	1	0.653710556	1	1
8.612108282130667e-05	NC_044371.1	48566001	48566599	+	87.2082	598	Intergenic	Intergenic	8764	LOC115707077	LOC115707077	XM_030634912	uncharacterized LOC115707077,	protein_coding	-2.356814332	5.25558E-08	9.1677E-07	-0.81323635	1	1
9.335613111331114e-10	NC_044374.1	52757801	52759399	+	87.182	1598	Intergenic	Intergenic	-23831	LOC115717842	LOC115717842	XM_030646813	reticulon-like protein B1	protein_coding	-0.460056429	1	NA	0.127887612	1	1
9.335613111331114e-10-2	NC_044375.1	78798001	78800399	+	87.182	2398	Intergenic	Intergenic	-34641	LOC115720379	LOC115720379	XM_030649531	uncharacterized LOC115720379	protein_coding	NA	NA	NA	NA	NA	NA
9.651152839386869e-09	NC_044379.1	7390801	7392199	+	87.148	1398	Intergenic	Intergenic	-17979	LOC115701781	LOC115701781	XR_004008761	small nucleolar RNA R71	snoRNA	NA	NA	NA	NA	NA	NA
3.096219370339228e-22	NC_044375.1	31775801	31779199	+	87.1177	3398	Intergenic	Intergenic	20372	LOC115720028	LOC115720028	XM_030649194	uncharacterized LOC115720028	protein_coding	NA	NA	NA	NA	NA	NA
1.0070731411154428e-07	NC_044373.1	39715801	39716999	+	87.1024	1198	Intergenic	Intergenic	-4667	LOC115715451	LOC115715451	XR_004011322	small nucleolar RNA R71	snoRNA	NA	NA	NA	NA	NA	NA
9.469772872597754e-06-4	NC_044376.1	17869201	17869999	+	87.1024	798	Intergenic	Intergenic	33553	LOC115721862	LOC115721862	XM_030650953	uncharacterized LOC115721862	protein_coding	-0.619484357	1	1	-0.912286302	1	1
1.123166566192768e-09	NC_044379.1	41058401	41059799	+	87.1024	1398	Intergenic	Intergenic	12522	LOC115700560	LOC115700560	XM_030628129	uncharacterized LOC115700560	protein_coding	-0.210660916	1	1	-0.220443004	1	1
9.469772872597754e-06	NC_044373.1	7717001	7717599	+	87.1024	598	Intergenic	Intergenic	16885	LOC115712537	LOC115712537	XM_030640828	uncharacterized LOC115712537,	protein_coding	0.618237935	1	1	0.360903682	1	1
9.469772872597754e-06-2	NC_044373.1	60207801	60208599	+	87.1024	798	Intergenic	Intergenic	-42010	LOC115713548	LOC115713548	XM_030642032	uncharacterized LOC115713548	protein_coding	NA	NA	NA	NA	NA	NA
9.469772872597754e-06-5	NW_022060487.1	370401	371199	+	87.1024	798	NA	NA	NA	NA			#N/A		NA	NA	NA	NA	NA	NA
9.469772872597754e-06-3	NC_044376.1	8374001	8374799	+	87.1024	798	Intergenic	Intergenic	-14487	LOC115723527	LOC115723527	XM_030653021	uncharacterized LOC115723527	protein_coding	NA	NA	NA	NA	NA	NA
3.055632564592966e-19	NW_022060329.1	159001	162599	+	87.0666	3598	Intergenic	Intergenic	-23708	LOC115701979	LOC115701979	XR_004008776	#N/A	lncRNA	NA	NA	NA	NA	NA	NA
1.1619313442772535e-08-2	NC_044376.1	33554401	33555599	+	87.0563	1198	Intergenic	Intergenic	-8132	LOC115724385	LOC115724385	XR_004013178	small nucleolar RNA R71	snoRNA	NA	NA	NA	NA	NA	NA
1.1619313442772535e-08-3	NC_044378.1	25882201	25883399	+	87.0563	1198	Intergenic	Intergenic	-34156	LOC115696909	LOC115696909	XM_030623809	inactive tetrahydrocannabinolic acid synthase-like	protein_coding	NA	NA	NA	NA	NA	NA
1.1619313442772535e-08	NC_044373.1	42686401	42687399	+	87.0563	998	Intergenic	Intergenic	-35432	LOC115713436	LOC115713436	XM_030641919	uncharacterized LOC115713436	protein_coding	NA	NA	NA	NA	NA	NA
1.0641119377159308e-06-2	NC_044379.1	4672001	4672999	+	87.0378	998	Intergenic	Intergenic	5473	LOC115699134	LOC115699134	XM_030626380	blue copper protein-like	protein_coding	0	1	NA	-0.998328082	1	NA
1.0641119377159308e-06	NC_044374.1	59586601	59587599	+	87.0378	998	Intergenic	Intergenic	55672	LOC115716857	LOC115716857	XR_004011616	uncharacterized LOC115716857	lncRNA	NA	NA	NA	NA	NA	NA
3.661199888800789e-18	NC_044374.1	85418601	85421399	+	87.0071	2798	Intergenic	Intergenic	-157296	LOC115716182	LOC115716182	XM_030644921	uncharacterized LOC115716182	protein_coding	2.148277376	0.003082854	0.022120827	0.135857219	1	1
1.5814048314014328e-10	NC_044376.1	16047201	16048399	+	86.9942	1198	Intergenic	Intergenic	9104	LOC115723612	LOC115723612	XM_030653097	uncharacterized LOC115723612	protein_coding	0	1	NA	-2.482294214	0.710578192	NA
0.00010437232026319821	NC_044378.1	33313401	33313999	+	86.9942	598	Intergenic	Intergenic	-18723	LOC115698139	LOC115698139	XM_030625315	cytochrome c oxidase assembly protein COX11, mitochondrial,	protein_coding	-0.096771591	1	1	0.132154082	1	1
0.00010437232026319821-2	NC_044378.1	50528801	50529399	+	86.9942	598	Intergenic	Intergenic	140708	LOC115698407	LOC115698407	XR_004008155	small nucleolar RNA R71	snoRNA	NA	NA	NA	NA	NA	NA
1.3989193766973654e-08-3	NC_044375.1	62958801	62959999	+	86.9629	1198	Intergenic	Intergenic	-16414	LOC115718492	LOC115718492	XR_004011941	uncharacterized LOC115718492,	lncRNA	0.64247531	1	1	0.281218911	1	1
1.3989193766973654e-08-5	NC_044377.1	54372001	54373199	+	86.9629	1198	Intergenic	Intergenic	16491	LOC115725265	LOC115725265	XM_030654721	glycosyltransferase BC10,	protein_coding	-0.248801496	1	1	0.259040957	1	1
1.3989193766973654e-08-4	NC_044377.1	43519601	43520599	+	86.9629	998	Intergenic	Intergenic	-459881	LOC115695201	LOC115695201	XM_030622286	uncharacterized LOC115695201	protein_coding	NA	NA	NA	NA	NA	NA
1.3989193766973654e-08	NC_044370.1	57152601	57153799	+	86.9629	1198	Intergenic	Intergenic	-6153	LOC115703463	LOC115703463	XR_004009225	small nucleolar RNA R71	snoRNA	NA	NA	NA	NA	NA	NA
1.3989193766973654e-08-2	NC_044370.1	77455401	77456799	+	86.9629	1398	Intergenic	Intergenic	-20839	LOC115717510	LOC115717510	XM_030646499	ubiquitin carboxyl-terminal hydrolase 16,	protein_coding	0.010490597	1	1	0.033581914	1	1
1.1445704944170034e-05-2	NC_044372.1	29494401	29495199	+	86.9392	798	Intergenic	Intergenic	-12371	LOC115709686	LOC115709686	XM_030637853	serine/threonine-protein kinase ATM,	protein_coding	0.18957048	1	1	0.190091675	1	1
1.625799898309696e-09	NC_044375.1	13864401	13865799	+	86.9392	1398	Intergenic	Intergenic	31742	LOC115719871	LOC115719871	XM_030649051	zinc finger MYM-type protein 1-like	protein_coding	NA	NA	NA	NA	NA	NA
1.1445704944170034e-05-3	NC_044372.1	31030201	31030799	+	86.9392	598	Intergenic	Intergenic	-27459	LOC115710617	LOC115710617	XM_030638973	uncharacterized LOC115710617	protein_coding	NA	NA	NA	NA	NA	NA
1.1445704944170034e-05	NC_044372.1	4879601	4879999	+	86.9392	398	Intergenic	Intergenic	-12767	LOC115710344	LOC115710344	XM_030638715	uncharacterized LOC115710344	protein_coding	NA	NA	NA	NA	NA	NA
1.2839043196428207e-06-2	NC_044375.1	6146401	6147399	+	86.9059	998	Intergenic	Intergenic	17736	LOC115719818	LOC115719818	XM_030649007	E3 ubiquitin-protein ligase RNF6-like	protein_coding	NA	NA	NA	NA	NA	NA
1.2839043196428207e-06	NC_044374.1	25132601	25133599	+	86.9059	998	Intergenic	Intergenic	-20484	LOC115715930	LOC115715930	XM_030644612	CEN-like protein 1	protein_coding	-9.152171554	3.304E-122	1.0586E-118	-6.289925364	2.31139E-52	9.45744E-50
1.2839043196428207e-06-3	NC_044376.1	25008201	25009199	+	86.9059	998	Intergenic	Intergenic	34842	LOC115723153	LOC115723153	XM_030652586	isoleucine--tRNA ligase, cytoplasmic	protein_coding	0.460829387	1	1	0.284332256	1	1
1.6842865461287215e-08	NC_044372.1	20234601	20235999	+	86.8676	1398	Intergenic	Intergenic	15084	LOC115710521	LOC115710521	XM_030638884	uncharacterized LOC115710521	protein_coding	NA	NA	NA	NA	NA	NA
1.6842865461287215e-08-2	NC_044373.1	70691601	70692999	+	86.8676	1398	Intergenic	Intergenic	-25038	LOC115712235	LOC115712235	XM_030640498	E3 ubiquitin-protein ligase FANCL	protein_coding	-0.690061952	1	1	0.374581747	1	1
3.171642110999667e-12	NC_044372.1	8475001	8476799	+	86.8324	1798	Intergenic	Intergenic	21547	LOC115709372	LOC115709372	XM_030637459	1-deoxy-D-xylulose 5-phosphate reductoisomerase, chloroplastic	protein_coding	-1.487306347	0.017675999	0.101489168	-1.623056525	0.002403286	0.023899002
6.350075067324681e-16	NC_044370.1	38349601	38352199	+	86.816	2598	Intergenic	Intergenic	103459	LOC115710594	LOC115710594	XM_030638955	#N/A	protein_coding	-1.123621975	0.724688754	1	-0.482413937	1	1
2.027918428609168e-08	NC_044370.1	90149801	90150799	+	86.7704	998	Intergenic	Intergenic	-71300	LOC115695058	LOC115695058	XM_030622156	protein FAR-RED IMPAIRED RESPONSE 1-like	protein_coding	NA	NA	NA	NA	NA	NA
1.383553815194836e-05	NC_044375.1	10033201	10033999	+	86.7704	798	Intergenic	Intergenic	-11633	LOC115718878	LOC115718878	XM_030647684	indole-3-acetaldehyde oxidase	protein_coding	-1.316541619	0.1457482	0.599554387	-0.190466122	1	1
0.0001265188539136722-3	NC_044374.1	85403201	85403799	+	86.7704	598	Intergenic	Intergenic	-173796	LOC115716182	LOC115716182	XM_030644921	uncharacterized LOC115716182	protein_coding	2.148277376	0.003082854	0.022120827	0.135857219	1	1
1.7624099201851788e-07-2	NC_044377.1	68170401	68171399	+	86.7704	998	Intergenic	Intergenic	-6995	LOC115695405	LOC115695405	XM_030622470	uncharacterized LOC115695405	protein_coding	NA	NA	NA	NA	NA	NA
1.5492001769910948e-06	NC_044372.1	46563801	46564599	+	86.7704	798	Intergenic	Intergenic	-26487	LOC115709607	LOC115709607	XM_030637743	transcriptional activator DEMETER	protein_coding	1.207762553	0.322260422	1	-0.55115713	1	1
0.0001265188539136722-2	NC_044373.1	42902801	42903399	+	86.7704	598	Intergenic	Intergenic	72492	LOC115713437	LOC115713437	XM_030641920	stress response protein NST1-like	protein_coding	-0.587400514	1	NA	-0.920448172	1	NA
1.7624099201851788e-07	NC_044377.1	10504801	10505999	+	86.7704	1198	exon	-exon (LOC115694959, exon 3 of 9)	778	LOC115694959	LOC115694959	XM_030622062	uncharacterized LOC115694959	protein_coding	0.374376113	1	NA	0.925217262	1	NA
1.7624099201851788e-07-3	NC_044378.1	69494001	69495199	+	86.7704	1198	Intergenic	Intergenic	-12392	LOC115696808	LOC115696808	XM_030623691	uncharacterized LOC115696808	protein_coding	-0.084565125	1	1	-0.087743101	1	1
0.0001265188539136722-4	NC_044376.1	18997001	18997599	+	86.7704	598	Intergenic	Intergenic	-16244	LOC115723645	LOC115723645	XM_030653128	uncharacterized LOC115723645	protein_coding	0.374376113	1	NA	0.925217262	1	NA
0.0001265188539136722	NC_044373.1	4125801	4126399	+	86.7704	598	Intergenic	Intergenic	5579	LOC115711975	LOC115711975	XM_030640174	tetraspanin-8-like	protein_coding	1.203714736	0.894705347	1	1.042598798	0.976542206	1
5.420203203662507e-13	NC_044373.1	77641201	77643199	+	86.7128	1998	Intergenic	Intergenic	10272	LOC115714065	LOC115714065	XM_030642598	60S ribosomal protein L19-3	protein_coding	0.183636483	1	1	0.930759048	1	1
2.8317368828904955e-09	NC_044376.1	43930401	43931999	+	86.6837	1598	Intergenic	Intergenic	16185	LOC115722985	LOC115722985	XM_030652379	probable anion transporter 4, chloroplastic	protein_coding	-0.547418848	1	1	0.114101381	1	1
2.1240196713610696e-07-2	NC_044379.1	12346201	12347599	+	86.6545	1398	intron	-intron (LOC115701551, intron 1 of 2)	7382	LOC115701551	LOC115701551	XM_030629367	1-aminocyclopropane-1-carboxylate oxidase-like	protein_coding	0	1	NA	-3.443425016	0.514446133	NA
2.1240196713610696e-07	NC_044377.1	25433801	25434599	+	86.6545	798	Intergenic	Intergenic	34119	LOC115695063	LOC115695063	XM_030622159	probable auxin efflux carrier component 1c	protein_coding	0	1	NA	-4.15813309	0.339451176	1
5.5013335999840214e-12	NC_044371.1	54550401	54552199	+	86.6439	1798	Intergenic	Intergenic	-360173	LOC115704145	LOC115704145	XM_030631362	uncharacterized LOC115704145	protein_coding	NA	NA	NA	NA	NA	NA
1.8694447322798609e-06	NC_044371.1	4168201	4168999	+	86.631	798	Intergenic	Intergenic	12710	LOC115704828	LOC115704828	XM_030632034	uncharacterized LOC115704828,	protein_coding	-2.926328766	3.3969E-06	4.46028E-05	-1.392483063	0.34960077	1
1.8694447322798609e-06-3	NW_022060414.1	15601	16599	+	86.631	998	NA	NA	NA	NA			#N/A		NA	NA	NA	NA	NA	NA
1.8694447322798609e-06-4	NW_022060514.1	23801	24599	+	86.631	798	NA	NA	NA	NA			#N/A		NA	NA	NA	NA	NA	NA
1.8694447322798609e-06-2	NC_044376.1	47072401	47073199	+	86.631	798	intron	-intron (LOC115723233, intron 1 of 2)	2475	LOC115723233	LOC115723233	XR_004012924	uncharacterized LOC115723233	lncRNA	NA	NA	NA	NA	NA	NA
2.7169259648832257e-18	NC_044377.1	7198801	7202199	+	86.6153	3398	Intergenic	Intergenic	-10585	LOC115725597	LOC115725597	XR_004013428	uncharacterized LOC115725597	lncRNA	0	1	NA	-4.416997873	0.288279206	1
1.6726368391782783e-05-3	NC_044374.1	39213401	39214199	+	86.5956	798	Intergenic	Intergenic	7098	LOC115717747	LOC115717747	XM_030646726	zinc finger BED domain-containing protein DAYSLEEPER-like	protein_coding	NA	NA	NA	NA	NA	NA
1.6726368391782783e-05-4	NC_044374.1	63052401	63052999	+	86.5956	598	Intergenic	Intergenic	-5540	LOC115716835	LOC115716835	XR_004011609	uncharacterized LOC115716835	lncRNA	NA	NA	NA	NA	NA	NA
1.6726368391782783e-05	NC_044370.1	60175401	60175999	+	86.5956	598	TTS	-TTS (LOC115722799)	1041	LOC115722799	LOC115722799	XM_030652128	NADH-ubiquinone oxidoreductase chain 3	protein_coding	NA	NA	NA	NA	NA	NA
1.6726368391782783e-05-2	NC_044371.1	72015401	72016199	+	86.5956	798	Intergenic	Intergenic	13110	LOC115704336	LOC115704336	XM_030631547	uncharacterized LOC115704336	protein_coding	NA	NA	NA	NA	NA	NA
2.940042788491263e-08	NC_044373.1	45057201	45058399	+	86.5701	1198	Intergenic	Intergenic	8522	LOC115715246	LOC115715246	XM_030644086	iron-sulfur assembly protein IscA, chloroplastic	protein_coding	-2.053591871	2.34389E-13	7.91856E-12	-0.705439317	1	1
2.269300678751332e-16	NC_044372.1	1137401	1140599	+	86.551	3198	Intergenic	Intergenic	-3634	LOC115708724	LOC115708724	XM_030636723	putative disease resistance protein RGA4,	protein_coding	4.61415775	6.65693E-11	1.69267E-09	1.940578447	0.024000627	0.176477839
0.00015339926012486254-4	NC_044372.1	60234601	60234999	+	86.536	398	Intergenic	Intergenic	-19140	LOC115710307	LOC115710307	XM_030638675	protein PLANT CADMIUM RESISTANCE 6	protein_coding	0.37439068	1	NA	-2.494100798	0.585537457	NA
0.00015339926012486254-5	NC_044378.1	48772201	48772599	+	86.536	398	Intergenic	Intergenic	43879	LOC115696618	LOC115696618	XM_030623512	uncharacterized LOC115696618	protein_coding	NA	NA	NA	NA	NA	NA
0.00015339926012486254-3	NC_044372.1	41654001	41654599	+	86.536	598	Intergenic	Intergenic	12073	LOC115708859	LOC115708859	XM_030636876	uncharacterized LOC115708859	protein_coding	-1.364843022	0.361670505	1	-2.714899946	1.49675E-05	0.000228764
0.00015339926012486254	NC_044370.1	54343201	54343599	+	86.536	398	Intergenic	Intergenic	-6355	LOC115712112	LOC115712112	XM_030640372	kinesin-like protein KIN-4A,	protein_coding	0.661044749	1	1	-0.593712019	1	1
2.5599342564116973e-07	NC_044372.1	22345001	22345799	+	86.536	798	Intergenic	Intergenic	-12861	LOC115711384	LOC115711384	XM_030639717	plant cysteine oxidase 3,	protein_coding	-0.148966187	1	1	0.344418845	1	1
0.00015339926012486254-2	NC_044370.1	80906201	80906799	+	86.536	598	Intergenic	Intergenic	34810	LOC115702588	LOC115702588	XM_030630000	histidine-containing phosphotransfer protein 4	protein_coding	-2.611682525	0.006302074	0.041644815	-4.798569303	6.3158E-11	1.94424E-09
3.260431630699724e-17	NC_044371.1	1085001	1087999	+	86.5218	2998	Intergenic	Intergenic	10460	LOC115706877	LOC115706877	XR_004009659	uncharacterized LOC115706877	lncRNA	NA	NA	NA	NA	NA	NA
1.5920787614864983e-14	NC_044374.1	77194001	77196599	+	86.5188	2598	Intergenic	Intergenic	354742	LOC115718006	LOC115718006	XM_030646974	uncharacterized LOC115718006	protein_coding	0	1	NA	-0.998328082	1	NA
2.7232397917867444e-16	NW_022060430.1	4601	6999	+	86.5059	2398	NA	NA	NA	NA			#N/A		NA	NA	NA	NA	NA	NA
3.611768287944487e-25	NW_022060476.1	935601	940599	+	86.4989	4998	Intergenic	Intergenic	206300	LOC115702188	LOC115702188	XM_030629636	#N/A	protein_coding	NA	NA	NA	NA	NA	NA
2.25604959015823e-06	NC_044373.1	83736201	83736799	+	86.4878	598	Intergenic	Intergenic	-9190	LOC115714396	LOC115714396	XM_030643084	vicilin-like seed storage protein At2g18540	protein_coding	6.076293839	0.000205247	0.001958045	0.649833918	1	1
3.540157559963473e-08	NC_044372.1	18478401	18479599	+	86.467	1198	Intergenic	Intergenic	-117689	LOC115710501	LOC115710501	XM_030638865	uncharacterized LOC115710501	protein_coding	NA	NA	NA	NA	NA	NA
4.6936992576838556e-17	NC_044374.1	56990801	56992199	+	86.4362	1398	Intergenic	Intergenic	16282	LOC115716353	LOC115716353	XM_030645131	#N/A	protein_coding	-4.520526283	7.13991E-08	1.22327E-06	-1.838348962	0.202641614	1
4.6936992576838556e-17-2	NC_044374.1	56993001	56994199	+	86.4362	1198	Intergenic	Intergenic	14182	LOC115716353	LOC115716353	XM_030645131	#N/A	protein_coding	-4.520526283	7.13991E-08	1.22327E-06	-1.838348962	0.202641614	1
2.0223717416015943e-05	NC_044374.1	45668001	45668999	+	86.4146	998	Intergenic	Intergenic	-29162	LOC115717789	LOC115717789	XM_030646763	expansin-B15-like	protein_coding	NA	NA	NA	NA	NA	NA
2.0223717416015943e-05-2	NC_044379.1	18204401	18204999	+	86.4146	598	Intergenic	Intergenic	-16839	LOC115701038	LOC115701038	XR_004008494	uncharacterized LOC115701038	lncRNA	NA	NA	NA	NA	NA	NA
3.0854469561812443e-07	NC_044379.1	19875201	19875799	+	86.4146	598	Intergenic	Intergenic	14937	LOC115699367	LOC115699367	XM_030626726	uncharacterized LOC115699367	protein_coding	0.244780183	1	1	0.210917702	1	1
2.4381371189666894e-21	NC_044372.1	77342801	77347199	+	86.381	4398	Intergenic	Intergenic	43609	LOC115708748	LOC115708748	XR_004010068	uncharacterized LOC115708748	lncRNA	-1.549161225	0.892941345	NA	-0.998320075	1	NA
8.098868843809772e-18	NC_044375.1	96332601	96335999	+	86.3735	3398	Intergenic	Intergenic	28806	LOC115719675	LOC115719675	XM_030648805	pre-rRNA-processing protein TSR2 homolog,	protein_coding	-0.205300225	1	1	0.279677658	1	1
4.262881761918279e-08-3	NC_044373.1	60986001	60986799	+	86.3617	798	Intergenic	Intergenic	-5632	LOC115715361	LOC115715361	XR_004011237	small nucleolar RNA R71	snoRNA	NA	NA	NA	NA	NA	NA
4.262881761918279e-08	NC_044370.1	60438401	60439399	+	86.3617	998	Intergenic	Intergenic	93154	LOC115722809	LOC115722809	XM_030652141	uncharacterized LOC115722809	protein_coding	NA	NA	NA	NA	NA	NA
4.262881761918279e-08-4	NC_044377.1	37178801	37179799	+	86.3617	998	Intergenic	Intergenic	-2571	LOC115695148	LOC115695148	XM_030622238	uncharacterized mitochondrial protein AtMg00860-like	protein_coding	NA	NA	NA	NA	NA	NA
4.262881761918279e-08-2	NC_044372.1	33240601	33241799	+	86.3617	1198	Intergenic	Intergenic	-15859	LOC115710631	LOC115710631	XM_030638988	uncharacterized LOC115710631	protein_coding	NA	NA	NA	NA	NA	NA
3.719004326100401e-07-2	NC_044376.1	49233601	49234399	+	86.2903	798	Intergenic	Intergenic	42791	LOC115724237	LOC115724237	XR_004013038	small nucleolar RNA R71	snoRNA	NA	NA	NA	NA	NA	NA
0.00018603459088731855	NC_044370.1	63952401	63952999	+	86.2903	598	Intergenic	Intergenic	182239	LOC115713265	LOC115713265	XM_030641748	beta-1,2-xylosyltransferase XYXT1,	protein_coding	0	1	NA	-1.881595599	0.827223042	NA
3.719004326100401e-07	NC_044371.1	70482601	70483799	+	86.2903	1198	Intergenic	Intergenic	-24769	LOC115705555	LOC115705555	XM_030632915	mitochondrial adenine nucleotide transporter ADNT1	protein_coding	-0.200936072	1	1	0.700874378	1	1
0.00018603459088731855-2	NC_044377.1	17470001	17470399	+	86.2903	398	Intergenic	Intergenic	-43403	LOC115724719	LOC115724719	XM_030654056	L10-interacting MYB domain-containing protein-like	protein_coding	1.537011912	0.531944199	1	1.466473976	0.56491287	1
6.776682220734e-16	NC_044378.1	49606801	49609799	+	86.2745	2998	Intergenic	Intergenic	-18225	LOC115698135	LOC115698135	XM_030625310	thioredoxin H-type	protein_coding	-0.425260202	1	1	1.302899065	0.314610566	1
1.3981639250250037e-17	NC_044374.1	56507601	56510399	+	86.2482	2798	Intergenic	Intergenic	-68538	LOC115716452	LOC115716452	XM_030645253	xyloglucan galactosyltransferase XLT2-like	protein_coding	-0.387685935	1	1	-0.852397096	1	1
2.4455455915197985e-05	NC_044371.1	4937001	4937799	+	86.227	798	Intergenic	Intergenic	-3916	LOC115706279	LOC115706279	XM_030633870	3-hydroxyisobutyryl-CoA hydrolase-like protein 3, mitochondrial,	protein_coding	0.715769825	1	1	0.38335453	1	1
2.4455455915197985e-05-2	NC_044373.1	39361401	39362199	+	86.227	798	Intergenic	Intergenic	21704	LOC115712562	LOC115712562	XM_030640861	uncharacterized LOC115712562	protein_coding	NA	NA	NA	NA	NA	NA
3.286369267210822e-06	NC_044370.1	25135201	25136199	+	86.1886	998	Intergenic	Intergenic	14644	LOC115702475	LOC115702475	XR_004008889	uncharacterized LOC115702475	lncRNA	0.374391473	1	NA	-0.919830608	1	NA
3.286369267210822e-06-2	NC_044372.1	68990201	68990999	+	86.1886	798	Intergenic	Intergenic	9188	LOC115710886	LOC115710886	XM_030639238	uncharacterized LOC115710886	protein_coding	NA	NA	NA	NA	NA	NA
3.286369267210822e-06-3	NC_044373.1	38219201	38220599	+	86.1886	1398	Intergenic	Intergenic	-10515	LOC115713380	LOC115713380	XM_030641864	uncharacterized mitochondrial protein AtMg00310-like	protein_coding	NA	NA	NA	NA	NA	NA
4.48285764475279e-07	NC_044370.1	30775401	30776799	+	86.1629	1398	Intergenic	Intergenic	-10787	LOC115709753	LOC115709753	XM_030637952	proteasome subunit alpha type-1-A	protein_coding	0.203275468	1	1	0.453400559	1	1
4.48285764475279e-07-4	NC_044378.1	11787801	11789199	+	86.1629	1398	Intergenic	Intergenic	16242	LOC115698391	LOC115698391	XR_004008140	small nucleolar RNA R71	snoRNA	NA	NA	NA	NA	NA	NA
4.48285764475279e-07-3	NC_044374.1	44216601	44217799	+	86.1629	1198	Intergenic	Intergenic	-73647	LOC115717402	LOC115717402	XM_030646368	#N/A	protein_coding	-0.587406029	1	1	-5.28232044	0.004366729	0.040132225
4.48285764475279e-07-2	NC_044370.1	61083201	61084399	+	86.1629	1198	Intergenic	Intergenic	-64827	LOC115703384	LOC115703384	XR_004009152	U6 spliceosomal RNA	snRNA	NA	NA	NA	NA	NA	NA
2.8203653606456927e-12	NC_044373.1	14997201	14999399	+	86.1629	2198	Intergenic	Intergenic	-17946	LOC115712188	LOC115712188	XM_030640437	uncharacterized protein DDB_G0281497	protein_coding	2.013123507	0.033012009	0.173717449	3.097275259	1.64275E-05	0.000249525
8.594372438417658e-09	NC_044373.1	39423401	39424799	+	86.1306	1398	Intergenic	Intergenic	23778	LOC115715112	LOC115715112	XM_030643921	transcription termination factor MTERF2, chloroplastic	protein_coding	0.044527326	1	1	0.403571924	1	1
1.2026147604671196e-09	NC_044374.1	41508201	41509799	+	86.1198	1598	Intergenic	Intergenic	-58358	LOC115716678	LOC115716678	XM_030645530	#N/A	protein_coding	0.951835487	1	1	-0.235594073	1	1
6.867745567061897e-14	NC_044375.1	17652601	17654799	+	86.0887	2198	Intergenic	Intergenic	-38743	LOC115719926	LOC115719926	XM_030649098	uncharacterized LOC115719926	protein_coding	NA	NA	NA	NA	NA	NA
3.966884925180393e-06-5	NC_044378.1	22532201	22532999	+	86.0324	798	Intergenic	Intergenic	-57975	LOC115696430	LOC115696430	XM_030623332	uncharacterized LOC115696430	protein_coding	NA	NA	NA	NA	NA	NA
7.444187699246999e-08	NC_044370.1	58190001	58191199	+	86.0324	1198	Intergenic	Intergenic	15779	LOC115724981	LOC115724981	XM_030654692	uncharacterized LOC115724981	protein_coding	NA	NA	NA	NA	NA	NA
2.9576568290175388e-05	NC_044370.1	22206801	22207399	+	86.0324	598	Intergenic	Intergenic	-5070	LOC115718203	LOC115718203	XM_030647151	uncharacterized LOC115718203	protein_coding	0.374376113	1	NA	0.925217262	1	NA
7.444187699246999e-08-2	NC_044372.1	5623801	5624999	+	86.0324	1198	Intergenic	Intergenic	11108	LOC115709614	LOC115709614	XM_030637753	uncharacterized LOC115709614	protein_coding	0.560032648	1	1	0.309812784	1	1
3.966884925180393e-06-3	NC_044373.1	62560801	62561599	+	86.0324	798	Intergenic	Intergenic	-6855	LOC115712716	LOC115712716	XR_004010928	uncharacterized LOC115712716	lncRNA	NA	NA	NA	NA	NA	NA
3.966884925180393e-06-4	NC_044377.1	24537401	24538799	+	86.0324	1398	Intergenic	Intergenic	331152	LOC115695060	LOC115695060	XM_030622157	uncharacterized LOC115695060	protein_coding	NA	NA	NA	NA	NA	NA
3.966884925180393e-06	NC_044370.1	58114001	58114799	+	86.0324	798	Intergenic	Intergenic	-3098	LOC115712842	LOC115712842	XM_030641234	growth-regulating factor 1	protein_coding	-3.190581489	0.022872739	0.126819341	-5.041538972	1.27169E-05	0.000196506
2.9576568290175388e-05-2	NC_044372.1	25759601	25759999	+	86.0324	398	Intergenic	Intergenic	-26566	LOC115709736	LOC115709736	XM_030637920	auxin response factor 18	protein_coding	-1.012856247	0.954079937	1	-0.251903176	1	1
3.966884925180393e-06-2	NC_044371.1	22071801	22072599	+	86.0324	798	Intergenic	Intergenic	109235	LOC115708437	LOC115708437	XR_004009937	small nucleolar RNA R71	snoRNA	NA	NA	NA	NA	NA	NA
7.444187699246999e-08-3	NC_044372.1	73991401	73992599	+	86.0324	1198	Intergenic	Intergenic	-13739	LOC115710920	LOC115710920	XM_030639271	uncharacterized LOC115710920	protein_coding	NA	NA	NA	NA	NA	NA
1.4462691004262207e-09	NC_044379.1	22358601	22360599	+	86.0324	1998	Intergenic	Intergenic	107457	LOC115699928	LOC115699928	XM_030627475	uncharacterized LOC115699928	protein_coding	NA	NA	NA	NA	NA	NA
0.00022566862078021808-2	NC_044377.1	28491801	28492399	+	86.0324	598	Intergenic	Intergenic	18306	LOC115695075	LOC115695075	XM_030622169	uncharacterized LOC115695075	protein_coding	NA	NA	NA	NA	NA	NA
5.403849241627415e-07	NC_044378.1	12233801	12234799	+	86.0324	998	promoter-TSS	-promoter-TSS (LOC115697300)	-13	LOC115697300	LOC115697300	XR_004007933	uncharacterized LOC115697300	lncRNA	NA	NA	NA	NA	NA	NA
0.00022566862078021808	NC_044370.1	76667001	76667599	+	86.0324	598	Intergenic	Intergenic	11202	LOC115724881	LOC115724881	XM_030654251	uncharacterized LOC115724881	protein_coding	NA	NA	NA	NA	NA	NA
2.023224205038644e-15	NC_044374.1	80218401	80221399	+	85.9826	2998	Intergenic	Intergenic	20519	LOC115718044	LOC115718044	XM_030647009	uncharacterized LOC115718044	protein_coding	-4.057200318	0.438958384	NA	0	1	1
7.186551888520061e-18	NC_044372.1	52478201	52481599	+	85.9483	3398	Intergenic	Intergenic	26198	LOC115711402	LOC115711402	XM_030639736	glycosyltransferase BC10-like	protein_coding	NA	NA	NA	NA	NA	NA
4.144886668977045e-11	NC_044373.1	72566001	72567799	+	85.8863	1798	Intergenic	Intergenic	17632	TRNAS-GCU_2	TRNAS-GCU_2	TRNAS-GCU_2	#N/A	tRNA	NA	NA	NA	NA	NA	NA
2.913146691635592e-15	NC_044375.1	43226801	43229599	+	85.8817	2798	Intergenic	Intergenic	-566795	LOC115721317	LOC115721317	XM_030650591	tropomyosin-2-like	protein_coding	1.940454338	0.414144069	1	1.706036753	0.502563852	1
4.788691209399812e-06-2	NC_044377.1	18101201	18101999	+	85.8715	798	Intergenic	Intergenic	2830	LOC115725666	LOC115725666	XM_030655251	benzyl alcohol O-benzoyltransferase	protein_coding	-0.813666622	1	1	-0.922250047	1	1
4.788691209399812e-06	NC_044370.1	59549201	59550599	+	85.8715	1398	Intergenic	Intergenic	-28882	LOC115713105	LOC115713105	XM_030641595	butyrate--CoA ligase AAE11, peroxisomal	protein_coding	-3.364031146	0.000413991	0.003725722	-0.040397677	1	1
7.2763820160095095e-40	NC_044372.1	55733401	55740599	+	85.8573	7198	promoter-TSS	-promoter-TSS (TRNAK-UUU_5)	-271	TRNAK-UUU_5	TRNAK-UUU_5	TRNAK-UUU_5	#N/A	tRNA	0.374376113	1	NA	0.925217262	1	NA
3.577494138156833e-05-2	NC_044372.1	3181001	3181599	+	85.8305	598	Intergenic	Intergenic	-15299	LOC115711861	LOC115711861	XR_004010727	small nucleolar RNA R71	snoRNA	NA	NA	NA	NA	NA	NA
3.577494138156833e-05-4	NC_044376.1	43617801	43618599	+	85.8305	798	Intergenic	Intergenic	22670	LOC115722079	LOC115722079	XM_030651200	uncharacterized LOC115722079,	protein_coding	-0.372140828	1	1	-0.053018716	1	1
3.577494138156833e-05	NC_044371.1	42453201	42453799	+	85.8305	598	intron	-intron (LOC115706437, intron 1 of 3)	-6426	LOC115706445	LOC115706445	XR_004009590	uncharacterized LOC115706445	lncRNA	-0.007953829	1	1	-0.51816267	1	1
3.577494138156833e-05-3	NC_044372.1	22283401	22283799	+	85.8305	398	Intergenic	Intergenic	28241	LOC115709404	LOC115709404	XM_030637501	enolase 1, chloroplastic	protein_coding	3.547757671	3.58975E-07	5.4723E-06	0.112375691	1	1
3.577494138156833e-05-5	NC_044378.1	51447601	51448199	+	85.8305	598	Intergenic	Intergenic	6086	LOC115696636	LOC115696636	XM_030623529	nucleoside-triphosphatase THEP1-like	protein_coding	0.041686852	1	1	-0.021314449	1	1
1.7120821278763733e-13	NC_044377.1	25950801	25953399	+	85.801	2598	Intergenic	Intergenic	-5355	LOC115696089	LOC115696089	XR_004007687	small nucleolar RNA R71	snoRNA	NA	NA	NA	NA	NA	NA
6.009866009239294e-16	NC_044374.1	50630601	50633399	+	85.7941	2798	Intergenic	Intergenic	-16948	LOC115717101	LOC115717101	XM_030646045	plastidal glycolate/glycerate translocator 1, chloroplastic	protein_coding	-2.741593655	4.29151E-15	1.79339E-13	-0.850077231	1	1
7.853463735910693e-07	NC_044379.1	61975801	61976799	+	85.7615	998	Intergenic	Intergenic	-27101	LOC115700632	LOC115700632	XM_030628243	probable receptor-like serine/threonine-protein kinase At4g34500	protein_coding	0.608711439	1	1	-0.565417121	1	1
2.5155942891402606e-09	NC_044377.1	8023401	8024599	+	85.7615	1198	Intergenic	Intergenic	26849	LOC115724840	LOC115724840	XM_030654197	NADP-dependent glyceraldehyde-3-phosphate dehydrogenase	protein_coding	-1.984668992	1.59895E-05	0.000187304	-0.390995959	1	1
5.781211926097483e-06-2	NC_044370.1	30693401	30693999	+	85.7056	598	Intergenic	Intergenic	13510	LOC115709733	LOC115709733	XM_030637918	L-type lectin-domain containing receptor kinase S.6	protein_coding	0.401429863	1	1	0.247115347	1	1
5.781211926097483e-06	NC_044370.1	6505201	6506199	+	85.7056	998	Intergenic	Intergenic	5755	LOC115703327	LOC115703327	XR_004009102	small nucleolar RNA R71	snoRNA	NA	NA	NA	NA	NA	NA
1.3002961275583733e-07	NC_044374.1	53024001	53025599	+	85.6815	1598	Intergenic	Intergenic	18302	LOC115715815	LOC115715815	XM_030644486	zinc finger protein ZAT4	protein_coding	0.9233437	1	1	-2.550842059	0.374351506	1
1.3002961275583733e-07-3	NC_044378.1	11405401	11406399	+	85.6815	998	Intergenic	Intergenic	12507	LOC115697295	LOC115697295	XM_030624242	uncharacterized LOC115697295	protein_coding	-1.2551923	0.206375879	0.788073802	0.045281607	1	1
1.3002961275583733e-07-2	NC_044376.1	58733801	58734999	+	85.6815	1198	Intergenic	Intergenic	10033	LOC115723986	LOC115723986	XM_030653443	polygalacturonase-like	protein_coding	NA	NA	NA	NA	NA	NA
1.4494205427163279e-24	NC_044372.1	25304601	25308599	+	85.6513	3998	Intergenic	Intergenic	93856	LOC115709797	LOC115709797	XM_030638013	RNA-binding protein CP29B, chloroplastic	protein_coding	-1.873341944	4.83793E-05	0.000521005	0.180738163	1	1
5.102387183788611e-10	NC_044377.1	1035801	1037399	+	85.6208	1598	Intergenic	Intergenic	37724	LOC115725183	LOC115725183	XM_030654616	putative disease resistance protein At3g14460	protein_coding	NA	NA	NA	NA	NA	NA
4.327839934404301e-05-2	NC_044378.1	26121801	26122599	+	85.6208	798	Intergenic	Intergenic	76681	LOC115697886	LOC115697886	XR_004007997	inactive tetrahydrocannabinolic acid synthase-like	transcribed_pseudogene	0	1	1	-8.174514626	3.77387E-07	7.38236E-06
4.327839934404301e-05	NC_044377.1	55706201	55706999	+	85.6208	798	Intergenic	Intergenic	-66020	LOC115694860	LOC115694860	XM_030621961	protein OSB4, chloroplastic,	protein_coding	0.027866869	1	1	0.493060384	1	1
2.285372330465295e-20	NC_044377.1	46127801	46131199	+	85.5648	3398	Intergenic	Intergenic	17877	LOC115694812	LOC115694812	XR_004007477	uncharacterized LOC115694812	lncRNA	-1.549169232	0.892939793	NA	0	1	NA
1.5660630795877258e-07	NC_044379.1	49100601	49101999	+	85.5594	1398	Intergenic	Intergenic	19371	LOC115700205	LOC115700205	XM_030627768	uncharacterized LOC115700205	protein_coding	NA	NA	NA	NA	NA	NA
6.980019549721871e-06	NC_044370.1	20947401	20948199	+	85.5347	798	Intergenic	Intergenic	-39197	LOC115705968	LOC115705968	XR_004009530	uncharacterized LOC115705968	lncRNA	-0.459363532	1	1	-0.912904593	1	1
6.980019549721871e-06-2	NC_044377.1	73704201	73704999	+	85.5347	798	Intergenic	Intergenic	57539	LOC115694792	LOC115694792	XM_030621887	uncharacterized LOC115694792	protein_coding	NA	NA	NA	NA	NA	NA
2.4993402079857747e-12	NC_044379.1	4279801	4281999	+	85.5213	2198	Intergenic	Intergenic	-42841	LOC115698615	LOC115698615	XM_030625733	zinc finger CCCH domain-containing protein 48-like	protein_coding	-1.549169232	0.892939793	NA	0	1	NA
2.6099725731962152e-08-2	NC_044377.1	59152001	59153199	+	85.5129	1198	Intergenic	Intergenic	21159	LOC115725487	LOC115725487	XM_030655026	uncharacterized LOC115725487,	protein_coding	-0.11203051	1	1	0.135641128	1	1
2.6099725731962152e-08	NC_044377.1	57313601	57315799	+	85.5129	2198	Intergenic	Intergenic	-71577	LOC115725296	LOC115725296	XM_030654760	homeobox-leucine zipper protein HOX11	protein_coding	-2.065360223	0.006633491	0.043565288	-2.211064526	0.001992669	0.020393966
4.267471690973992e-13	NC_044378.1	51137801	51139799	+	85.4973	1998	Intergenic	Intergenic	18272	LOC115696857	LOC115696857	XM_030623739	transcription factor bHLH30	protein_coding	-0.210794793	1	1	1.157901614	0.513369296	1
7.301842506202551e-14	NC_044379.1	5528401	5530799	+	85.4765	2398	Intergenic	Intergenic	-243480	LOC115701194	LOC115701194	XM_030628916	39S ribosomal protein L28, mitochondrial	protein_coding	0.02710153	1	1	0.319866486	1	1
1.1415729749258833e-06	NC_044375.1	13050001	13050999	+	85.4765	998	Intergenic	Intergenic	-99027	LOC115719864	LOC115719864	XM_030649044	serine/arginine-rich splicing factor 11-like	protein_coding	NA	NA	NA	NA	NA	NA
7.372461679547505e-10	NC_044378.1	63099601	63101999	+	85.4471	2398	Intergenic	Intergenic	19439	LOC115697202	LOC115697202	XM_030624115	homeobox-leucine zipper protein ATHB-14,	protein_coding	2.729438675	1.22887E-05	0.000146998	2.711547978	1.26414E-05	0.000195494
8.762941789718826e-14-2	NC_044372.1	1699001	1701399	+	85.4177	2398	Intergenic	Intergenic	-7305	LOC115708894	LOC115708894	XM_030636917	protein DETOXIFICATION 43,	protein_coding	6.911979972	6.25917E-05	0.000658926	9.931514219	3.39479E-08	7.60247E-07
8.762941789718826e-14	NC_044370.1	83827201	83829399	+	85.4177	2198	Intergenic	Intergenic	25982	LOC115703450	LOC115703450	XR_004009213	small nucleolar RNA R71	snoRNA	NA	NA	NA	NA	NA	NA
5.2363255639838264e-05-2	NC_044377.1	24804601	24805399	+	85.4029	798	Intergenic	Intergenic	64252	LOC115695060	LOC115695060	XM_030622157	uncharacterized LOC115695060	protein_coding	NA	NA	NA	NA	NA	NA
5.2363255639838264e-05	NC_044375.1	55578201	55578799	+	85.4029	598	Intergenic	Intergenic	12294	LOC115720932	LOC115720932	XM_030650144	AT-hook motif nuclear-localized protein 23-like	protein_coding	-0.678634056	1	1	-2.895363499	0.277245257	1
4.3789025185497196e-95	NC_044374.1	87146401	87160799	+	85.3806	14398	Intergenic	Intergenic	-10548	LOC115715698	LOC115715698	XM_030644362	subtilisin-like protease SBT1.7	protein_coding	1.870329322	0.827523269	NA	2.421170472	0.722007346	NA
5.262804494730192e-09	NC_044377.1	32829801	32830999	+	85.3781	1198	Intergenic	Intergenic	-206924	LOC115695107	LOC115695107	XM_030622197	uncharacterized LOC115695107	protein_coding	NA	NA	NA	NA	NA	NA
6.14906289853877e-13	NC_044374.1	67457201	67459199	+	85.371	1998	Intergenic	Intergenic	28243	LOC115716511	LOC115716511	XM_030645320	#N/A	protein_coding	-0.590740823	1	1	-0.290657613	1	1
8.428125201660479e-06	NC_044374.1	7989801	7990599	+	85.3583	798	exon	-exon (LOC115717533, exon 2 of 2)	1230	LOC115717533	LOC115717533	XM_030646519	uncharacterized LOC115717533	protein_coding	0.374391473	1	NA	-0.919830608	1	NA
1.3764407145265783e-06-2	NC_044374.1	82058201	82059199	+	85.3283	998	Intergenic	Intergenic	14141	LOC115716468	LOC115716468	XM_030645274	aluminum-activated malate transporter 14	protein_coding	-6.018095447	1.31485E-53	5.74439E-51	-3.790498853	4.61777E-17	2.43145E-15
1.3764407145265783e-06	NC_044372.1	6039401	6040399	+	85.3283	998	Intergenic	Intergenic	8545	LOC115710359	LOC115710359	XM_030638729	uncharacterized LOC115710359	protein_coding	NA	NA	NA	NA	NA	NA
1.3764407145265783e-06-3	NC_044377.1	62774601	62775399	+	85.3283	798	Intergenic	Intergenic	16216	LOC115724483	LOC115724483	XM_030653774	uncharacterized protein At1g10890,	protein_coding	0.426325328	1	1	-0.037447676	1	1
2.5424161374974568e-11	NC_044375.1	43813001	43814799	+	85.3283	1798	Intergenic	Intergenic	18905	LOC115721317	LOC115721317	XM_030650591	tropomyosin-2-like	protein_coding	1.940454338	0.414144069	1	1.706036753	0.502563852	1
3.7800928125965445e-08-2	NC_044375.1	83802601	83803799	+	85.2907	1198	Intergenic	Intergenic	-5969	LOC115720829	LOC115720829	XM_030650008	nicotianamine synthase-like	protein_coding	-1.549169232	0.892939793	NA	0	1	NA
3.7800928125965445e-08	NC_044373.1	7209201	7209999	+	85.2907	798	Intergenic	Intergenic	-5679	LOC115715412	LOC115715412	XR_004011283	small nucleolar RNA R71	snoRNA	NA	NA	NA	NA	NA	NA
3.7800928125965445e-08-3	NC_044378.1	56753201	56754399	+	85.2907	1198	Intergenic	Intergenic	21982	LOC115696673	LOC115696673	XM_030623563	uncharacterized LOC115696673	protein_coding	NA	NA	NA	NA	NA	NA
1.0652635436411011e-09	NC_044370.1	15709601	15711199	+	85.268	1598	Intergenic	Intergenic	-11310	LOC115702544	LOC115702544	XM_030629968	probable aquaporin TIP3-2	protein_coding	2.373404736	0.201897156	0.774355352	0.411443864	1	1
2.2678659719235203e-17	NC_044370.1	86947201	86949799	+	85.2223	2598	TTS	-TTS (TRNAN-GUU_16)	787	TRNAN-GUU_16	TRNAN-GUU_16	TRNAN-GUU_16	#N/A	tRNA	-0.619847756	1	NA	-0.124674154	1	1
7.612520354072556e-09	NC_044373.1	24861001	24862599	+	85.1762	1598	Intergenic	Intergenic	-26910	LOC115715175	LOC115715175	XM_030644006	aspartic proteinase nepenthesin-1	protein_coding	1.364768517	0.68080879	1	-1.247317349	0.761563807	1
1.8175396403855084e-13	NC_044373.1	39659801	39662199	+	85.1762	2398	intron	-intron (LOC115713411, intron 1 of 2)	351	LOC115713411	LOC115713411	XM_030641895	uncharacterized LOC115713411	protein_coding	-0.117058248	1	NA	-1.068535523	0.971405404	1
0.00040345661487755003	NC_044379.1	19131801	19132199	+	85.1762	398	Intergenic	Intergenic	64417	LOC115701632	LOC115701632	XR_004008625	small nucleolar RNA R71	snoRNA	NA	NA	NA	NA	NA	NA
6.336471278374948e-05	NC_044375.1	62838001	62838599	+	85.1762	598	Intergenic	Intergenic	44021	LOC115720244	LOC115720244	XM_030649401	uncharacterized LOC115720244	protein_coding	NA	NA	NA	NA	NA	NA
6.336471278374948e-05-2	NC_044376.1	58130401	58130999	+	85.1762	598	promoter-TSS	-promoter-TSS (LOC115724189)	-1472	LOC115724189	LOC115724189	XM_030653663	probable glycosyltransferase At5g03795	protein_coding	1.86655337	0.519990514	1	-8.142644117	9.34108E-28	1.15383E-25
1.0177540504313818e-05-2	NC_044373.1	89586801	89587599	+	85.1762	798	Intergenic	Intergenic	-5497	LOC115712099	LOC115712099	XM_030640331	glycine-rich protein 5	protein_coding	0.374391759	1	1	-10.03261276	1.15506E-13	4.62026E-12
1.6597153550268502e-06	NC_044371.1	85113401	85114199	+	85.1762	798	Intergenic	Intergenic	20461	LOC115706288	LOC115706288	XM_030633883	early nodulin-like protein 2	protein_coding	-1.085084611	0.75381913	1	-1.732338514	0.006844907	0.0598282
2.736454680288698e-07	NC_044373.1	60493001	60493999	+	85.1762	998	Intergenic	Intergenic	-9755	LOC115713549	LOC115713549	XM_030642033	uncharacterized LOC115713549	protein_coding	2.434006535	0.717697619	NA	2.984847685	0.61678356	NA
1.6597153550268502e-06-2	NC_044377.1	43579001	43579999	+	85.1762	998	Intergenic	Intergenic	-519281	LOC115695201	LOC115695201	XM_030622286	uncharacterized LOC115695201	protein_coding	NA	NA	NA	NA	NA	NA
1.0177540504313818e-05	NC_044373.1	63708201	63708999	+	85.1762	798	Intergenic	Intergenic	-30920	LOC115715385	LOC115715385	XR_004011259	small nucleolar RNA R71	snoRNA	NA	NA	NA	NA	NA	NA
1.2765778250431571e-12	NC_044375.1	44624601	44626599	+	85.1098	1998	Intergenic	Intergenic	-84487	LOC115720120	LOC115720120	XM_030649281	uncharacterized LOC115720120	protein_coding	0.469670029	1	1	-0.219661927	1	1
4.4050351160134536e-11	NC_044378.1	16435201	16437199	+	85.0986	1998	Intergenic	Intergenic	35404	LOC115698025	LOC115698025	XM_030625205	urease accessory protein D	protein_coding	-0.477142797	1	1	-0.031737057	1	1
9.155660553180425e-09	NC_044370.1	74544801	74546799	+	85.0725	1998	Intergenic	Intergenic	9967	LOC115702565	LOC115702565	XM_030629981	cytochrome P450 81Q32	protein_coding	0	1	NA	-3.2456505	0.565254223	NA
9.155660553180425e-09-2	NC_044372.1	64723001	64724399	+	85.0725	1398	Intergenic	Intergenic	-62144	LOC115711306	LOC115711306	XR_004010454	uncharacterized LOC115711306	lncRNA	1.216150859	0.73300857	1	0.938866112	1	1
1.3195765367426626e-15	NC_044377.1	44024201	44026999	+	85.0725	2798	Intergenic	Intergenic	-78432	LOC115695668	LOC115695668	XM_030622727	uncharacterized protein At1g66480	protein_coding	3.167632037	5.83816E-07	8.59824E-06	3.239340754	1.76875E-07	3.63751E-06
5.475187595931995e-08	NC_044375.1	55723601	55724799	+	85.0594	1198	Intergenic	Intergenic	-17348	LOC115720899	LOC115720899	XM_030650103	hydroxyproline O-arabinosyltransferase 3	protein_coding	-0.121805545	1	1	-0.229214647	1	1
3.2961561784579124e-07	NC_044371.1	28341001	28342799	+	85.0426	1798	Intergenic	Intergenic	-31278	LOC115703970	LOC115703970	XM_030631195	uncharacterized LOC115703970	protein_coding	NA	NA	NA	NA	NA	NA
3.2961561784579124e-07-2	NW_022060402.1	14401	15599	+	85.0426	1198	Intergenic	Intergenic	8976	LOC115702052	LOC115702052	XR_004008785	#N/A	lncRNA	NA	NA	NA	NA	NA	NA
8.991685620653168e-12	NC_044375.1	21462601	21464599	+	85.0322	1998	Intergenic	Intergenic	-25062	LOC115719948	LOC115719948	XM_030649119	uncharacterized LOC115719948	protein_coding	0	1	NA	-1.770848997	0.849029162	NA
5.290700089462088e-11	NW_022060397.1	74401	76399	+	85.02	1998	intron	-intron (LOC115702039, intron 5 of 5)	10903	LOC115702039	LOC115702039	XM_030629497	#N/A	protein_coding	NA	NA	NA	NA	NA	NA
2.001393066236985e-06-2	NC_044375.1	94524801	94525999	+	85.02	1198	Intergenic	Intergenic	-3944	LOC115718667	LOC115718667	XR_004011998	uncharacterized LOC115718667	lncRNA	NA	NA	NA	NA	NA	NA
2.001393066236985e-06	NC_044374.1	20024201	20024999	+	85.02	798	Intergenic	Intergenic	-83635	LOC115716838	LOC115716838	XR_004011611	uncharacterized LOC115716838	lncRNA	NA	NA	NA	NA	NA	NA
2.001393066236985e-06-3	NC_044379.1	21596001	21596999	+	85.02	998	Intergenic	Intergenic	12587	LOC115700995	LOC115700995	XR_004008478	uncharacterized LOC115700995	lncRNA	0	1	NA	-0.998328082	1	NA
1.2291168915829637e-05	NC_044371.1	44108401	44109199	+	84.9882	798	Intergenic	Intergenic	-38403	LOC115704941	LOC115704941	XM_030632158	LOB domain-containing protein 15	protein_coding	1.226210966	0.861718732	1	-2.336550323	0.241494381	1
1.2291168915829637e-05-5	NC_044378.1	51739001	51739999	+	84.9882	998	Intergenic	Intergenic	-36803	LOC115697193	LOC115697193	XM_030624106	protein STICHEL-like 3,	protein_coding	0.42923363	1	1	0.599546651	1	1
1.2291168915829637e-05-4	NC_044374.1	1439001	1439799	+	84.9882	798	Intergenic	Intergenic	-30200	LOC115716540	LOC115716540	XM_030645352	1-aminocyclopropane-1-carboxylate synthase 9-like	protein_coding	-1.549180246	0.841616257	NA	-4.081433575	0.223009741	1
1.2291168915829637e-05-3	NC_044373.1	56781601	56782399	+	84.9882	798	Intergenic	Intergenic	-134538	LOC115712038	LOC115712038	XM_030640246	extensin	protein_coding	-0.361359541	1	1	-0.57536959	1	1
1.8502604286286626e-09	NC_044372.1	762401	763999	+	84.9882	1598	Intergenic	Intergenic	-10577	LOC115708728	LOC115708728	XM_030636729	serine carboxypeptidase-like 40	protein_coding	4.041832287	0.076326814	0.353464307	-0.393910544	1	1
1.2291168915829637e-05-2	NC_044373.1	14569801	14570599	+	84.9882	798	Intergenic	Intergenic	-56834	LOC115713375	LOC115713375	XM_030641857	DNA damage-repair/toleration protein DRT100	protein_coding	4.52192773	NA	NA	-2.548389806	NA	NA
1.1011705163785166e-08	NC_044375.1	13384601	13385999	+	84.967	1398	Intergenic	Intergenic	76649	LOC115719866	LOC115719866	XM_030649046	two-component response regulator ARR22-like	protein_coding	NA	NA	NA	NA	NA	NA
1.1011705163785166e-08-2	NC_044379.1	1925601	1926999	+	84.967	1398	Intergenic	Intergenic	-863489	LOC115698919	LOC115698919	XM_030626122	extracellular ribonuclease LE	protein_coding	2.667802986	0.007814691	0.050323215	-3.483828726	2.07725E-15	9.57681E-14
1.0795950311333786e-11	NC_044372.1	61669601	61671599	+	84.9588	1998	Intergenic	Intergenic	-14621	LOC115709814	LOC115709814	XM_030638044	formin-like protein 20,	protein_coding	0.055229222	1	1	-0.150370862	1	1
6.589592947465339e-08	NC_044373.1	81380201	81381799	+	84.9403	1598	Intergenic	Intergenic	-7022	LOC115712347	LOC115712347	XR_004010845	uncharacterized LOC115712347	lncRNA	NA	NA	NA	NA	NA	NA
7.668951346668616e-05-5	NC_044379.1	32092201	32092999	+	84.9403	798	Intergenic	Intergenic	-11875	LOC115698687	LOC115698687	XM_030625825	uncharacterized LOC115698687	protein_coding	0	1	NA	-1.881595599	0.827223042	NA
7.668951346668616e-05-3	NC_044377.1	31664001	31664599	+	84.9403	598	Intergenic	Intergenic	11667	LOC115724455	LOC115724455	XM_030653743	uncharacterized LOC115724455,	protein_coding	0.326553875	1	1	0.31820345	1	1
6.589592947465339e-08-2	NC_044375.1	18798801	18799599	+	84.9403	798	Intergenic	Intergenic	4782	LOC115719934	LOC115719934	XM_030649106	uncharacterized LOC115719934	protein_coding	NA	NA	NA	NA	NA	NA
7.668951346668616e-05	NC_044371.1	15306001	15306799	+	84.9403	798	Intergenic	Intergenic	13362	LOC115705033	LOC115705033	XM_030632267	#N/A	protein_coding	3.068407679	0.00283661	0.020545649	1.872563516	0.180406042	0.941332272
7.668951346668616e-05-4	NC_044378.1	22838801	22839599	+	84.9403	798	Intergenic	Intergenic	29934	LOC115698411	LOC115698411	XR_004008159	small nucleolar RNA R71	snoRNA	NA	NA	NA	NA	NA	NA
7.668951346668616e-05-6	NC_044379.1	51078001	51078599	+	84.9403	598	Intergenic	Intergenic	-23326	LOC115700524	LOC115700524	XM_030628073	transcription activator GLK1	protein_coding	-5.086325608	6.28814E-41	1.59048E-38	-3.745009939	2.3929E-19	1.52586E-17
6.354404291219145e-11	NC_044377.1	44010401	44011999	+	84.9403	1598	Intergenic	Intergenic	-92832	LOC115695668	LOC115695668	XM_030622727	uncharacterized protein At1g66480	protein_coding	3.167632037	5.83816E-07	8.59824E-06	3.239340754	1.76875E-07	3.63751E-06
6.589592947465339e-08-3	NC_044377.1	15975201	15975999	+	84.9403	798	promoter-TSS	-promoter-TSS (TRNAS-GCU_5)	-1635	TRNAS-GCU_5	TRNAS-GCU_5	TRNAS-GCU_5	#N/A	tRNA	NA	NA	NA	NA	NA	NA
7.668951346668616e-05-2	NC_044372.1	34323001	34323599	+	84.9403	598	Intergenic	Intergenic	-4818	LOC115711610	LOC115711610	XM_030639981	protein BUD31 homolog 2	protein_coding	0.451010632	1	1	0.502937347	1	1
3.970459870738656e-07-3	NC_044378.1	60009201	60010199	+	84.9058	998	Intergenic	Intergenic	-8662	LOC115697264	LOC115697264	XM_030624197	vesicle-associated membrane protein 721	protein_coding	0.265045997	1	1	0.205370093	1	1
3.970459870738656e-07-2	NC_044374.1	59987601	59988599	+	84.9058	998	Intergenic	Intergenic	456672	LOC115716857	LOC115716857	XR_004011616	uncharacterized LOC115716857	lncRNA	NA	NA	NA	NA	NA	NA
3.970459870738656e-07	NC_044370.1	97269401	97270199	+	84.9058	798	Intergenic	Intergenic	-13913	LOC115699010	LOC115699010	XM_030626223	serine hydroxymethyltransferase 7	protein_coding	-0.646984783	1	1	-0.39169745	1	1
3.970459870738656e-07-4	NC_044379.1	46167801	46169399	+	84.9058	1598	intron	-intron (LOC115700166, intron 3 of 3)	-10793	LOC115700165	LOC115700165	XM_030627727	putative leucine-rich repeat receptor-like protein kinase At2g19210	protein_coding	0	1	NA	-3.23261311	0.572816935	NA
2.224130265161195e-09	NC_044373.1	52742001	52743799	+	84.8919	1798	Intergenic	Intergenic	8835	LOC115712818	LOC115712818	XM_030641196	glucose-1-phosphate adenylyltransferase large subunit 1	protein_coding	0.75305968	1	1	0.72227518	1	1
2.224130265161195e-09-2	NW_022060446.1	48601	49999	+	84.8919	1398	Intergenic	Intergenic	-11330	LOC115702107	LOC115702107	XM_030629562	#N/A	protein_coding	-0.635592453	1	1	-1.054263026	0.836778604	1
2.4135386818726035e-06-3	NW_022060324.1	25201	26199	+	84.8595	998	NA	NA	NA	NA			#N/A		NA	NA	NA	NA	NA	NA
0.0004899540820046056	NC_044377.1	75377401	75377799	+	84.8595	398	Intergenic	Intergenic	-6723	LOC115695498	LOC115695498	XM_030622561	uncharacterized LOC115695498	protein_coding	NA	NA	NA	NA	NA	NA
2.4135386818726035e-06	NC_044371.1	51728401	51729199	+	84.8595	798	Intergenic	Intergenic	135503	LOC115705418	LOC115705418	XR_004009460	uncharacterized LOC115705418	lncRNA	NA	NA	NA	NA	NA	NA
1.3244119603125635e-08-2	NC_044375.1	54735401	54736599	+	84.8595	1198	Intergenic	Intergenic	134741	LOC115718674	LOC115718674	XM_030647495	zinc finger protein WIP5	protein_coding	3.004878929	1.4631E-05	0.000173078	1.804768571	0.054712051	0.353352412
2.4135386818726035e-06-2	NC_044377.1	35174401	35175199	+	84.8595	798	Intergenic	Intergenic	-14112	LOC115695122	LOC115695122	XM_030622213	uncharacterized LOC115695122	protein_coding	NA	NA	NA	NA	NA	NA
1.3244119603125635e-08	NC_044370.1	57902401	57903799	+	84.8595	1398	Intergenic	Intergenic	-7199	LOC115703289	LOC115703289	XR_004009065	small nucleolar RNA R71	snoRNA	NA	NA	NA	NA	NA	NA
2.649901695849881e-12	NC_044378.1	12118601	12120199	+	84.8362	1598	Intergenic	Intergenic	-15963	LOC115697513	LOC115697513	XM_030624548	protein NRT1/ PTR FAMILY 5.6	protein_coding	0.329597083	1	1	1.543427857	0.172954454	0.908728057
7.673770206868029e-22	NW_022060476.1	374401	378199	+	84.8232	3798	Intergenic	Intergenic	-355500	LOC115702188	LOC115702188	XM_030629636	#N/A	protein_coding	NA	NA	NA	NA	NA	NA
7.930959617695199e-08	NC_044371.1	86763201	86764599	+	84.8187	1398	promoter-TSS	-promoter-TSS (LOC115706534)	-1681	LOC115706534	LOC115706534	XM_030634211	uncharacterized LOC115706534	protein_coding	-2.490376103	0.711778895	NA	-1.927554962	0.818188539	NA
4.4296135704809926e-21	NC_044377.1	44028201	44032599	+	84.8092	4398	Intergenic	Intergenic	-73632	LOC115695668	LOC115695668	XM_030622727	uncharacterized protein At1g66480	protein_coding	3.167632037	5.83816E-07	8.59824E-06	3.239340754	1.76875E-07	3.63751E-06
1.4845096432067497e-05-2	NC_044375.1	86847801	86848599	+	84.794	798	Intergenic	Intergenic	-6469	LOC115719325	LOC115719325	XM_030648311	ubiquitin-conjugating enzyme E2-17 kDa	protein_coding	-0.166625181	1	1	0.086913748	1	1
2.6735510925245013e-09	NC_044377.1	58290001	58291599	+	84.794	1598	Intergenic	Intergenic	-102420	LOC115724685	LOC115724685	XM_030654024	vicianin hydrolase	protein_coding	3.448208057	0.063337763	0.302720493	-2.629489952	0.007425385	0.064216011
1.4845096432067497e-05	NC_044375.1	18358401	18358999	+	84.794	598	Intergenic	Intergenic	37620	LOC115720628	LOC115720628	XM_030649792	uncharacterized LOC115720628,	protein_coding	-0.001112217	1	1	-0.336614514	1	1
5.427719371467458e-13	NC_044370.1	20740001	20741999	+	84.794	1998	exon	-exon (LOC115717929, exon 3 of 4)	1984	LOC115717929	LOC115717929	XM_030646898	uncharacterized LOC115717929	protein_coding	-0.587405102	1	NA	-2.905451475	0.356773428	1
4.782858128089468e-07	NC_044379.1	25385801	25386799	+	84.7658	998	Intergenic	Intergenic	105692	LOC115699951	LOC115699951	XM_030627497	uncharacterized LOC115699951	protein_coding	NA	NA	NA	NA	NA	NA
3.1806501209050576e-12	NC_044372.1	73183801	73186399	+	84.7658	2598	Intergenic	Intergenic	-48806	LOC115711788	LOC115711788	XR_004010663	small nucleolar RNA R71	snoRNA	NA	NA	NA	NA	NA	NA
1.5929244850121357e-08	NC_044373.1	37657001	37658199	+	84.75	1198	Intergenic	Intergenic	-3243	LOC115715124	LOC115715124	XM_030643936	lipase-like PAD4	protein_coding	-1.094751169	0.868473205	1	-0.409829949	1	1
1.8685355737803792e-11	NC_044379.1	5443401	5445199	+	84.733	1798	Intergenic	Intergenic	-158180	LOC115701194	LOC115701194	XM_030628916	39S ribosomal protein L28, mitochondrial	protein_coding	0.02710153	1	1	0.319866486	1	1
2.8751686954696316e-17	NC_044374.1	55965601	55968599	+	84.7184	2998	Intergenic	Intergenic	-30495	LOC115716233	LOC115716233	XM_030644985	probable mediator of RNA polymerase II transcription subunit 37e	protein_coding	-0.443060218	1	1	0.782706728	1	1
1.3360425383472116e-13-2	NC_044377.1	6971801	6974799	+	84.6945	2998	Intergenic	Intergenic	6227	LOC115725515	LOC115725515	XM_030655066	uncharacterized LOC115725515	protein_coding	1.718640647	0.126851051	0.536160457	2.813138332	0.000126948	0.001642468
9.283133605659639e-05-3	NC_044377.1	52458601	52459199	+	84.6945	598	Intergenic	Intergenic	138902	LOC115696088	LOC115696088	XR_004007686	small nucleolar RNA R71	snoRNA	NA	NA	NA	NA	NA	NA
9.283133605659639e-05-5	NC_044379.1	45351601	45352199	+	84.6945	598	Intergenic	Intergenic	-3881	LOC115698951	LOC115698951	XM_030626160	protein no-on-transient A	protein_coding	-0.385389319	1	1	-0.147487465	1	1
3.2137905982320215e-09	NC_044375.1	35330001	35331799	+	84.6945	1798	Intergenic	Intergenic	21440	LOC115720049	LOC115720049	XM_030649214	uncharacterized LOC115720049	protein_coding	NA	NA	NA	NA	NA	NA
9.283133605659639e-05-2	NC_044377.1	43325401	43325999	+	84.6945	598	Intergenic	Intergenic	-265481	LOC115695201	LOC115695201	XM_030622286	uncharacterized LOC115695201	protein_coding	NA	NA	NA	NA	NA	NA
1.3360425383472116e-13	NC_044372.1	52972201	52974399	+	84.6945	2198	Intergenic	Intergenic	73264	LOC115711878	LOC115711878	XR_004010746	small nucleolar RNA R71	snoRNA	NA	NA	NA	NA	NA	NA
9.283133605659639e-05-4	NC_044379.1	1605001	1605599	+	84.6945	598	Intergenic	Intergenic	-1184489	LOC115698919	LOC115698919	XM_030626122	extracellular ribonuclease LE	protein_coding	2.667802986	0.007814691	0.050323215	-3.483828726	2.07725E-15	9.57681E-14
2.910714814252616e-06	NC_044376.1	45486401	45487199	+	84.6945	798	Intergenic	Intergenic	-18393	LOC115722987	LOC115722987	XM_030652381	heavy metal-associated isoprenylated plant protein 21	protein_coding	2.567998356	0.692220937	NA	3.118839506	0.592716704	NA
9.283133605659639e-05	NC_044377.1	30922401	30922999	+	84.6945	598	Intergenic	Intergenic	24604	LOC115695723	LOC115695723	XR_004007539	uncharacterized LOC115695723,	lncRNA	-0.091423747	1	1	-0.101759018	1	1
3.2137905982320215e-09-2	NC_044378.1	30692401	30693999	+	84.6945	1598	Intergenic	Intergenic	-9370	LOC115696483	LOC115696483	XM_030623383	berberine bridge enzyme-like 8	protein_coding	NA	NA	NA	NA	NA	NA
3.292316657670608e-14	NC_044370.1	61258201	61259599	+	84.6053	1398	Intergenic	Intergenic	-66032	LOC115703365	LOC115703365	XR_004009137	small nucleolar RNA R71	snoRNA	NA	NA	NA	NA	NA	NA
2.3989129403965346e-16	NC_044371.1	57356801	57359599	+	84.5933	2798	Intergenic	Intergenic	-5885	LOC115704158	LOC115704158	XM_030631374	uncharacterized LOC115704158	protein_coding	NA	NA	NA	NA	NA	NA
1.7931366460972717e-05-2	NC_044374.1	45032801	45033599	+	84.5933	798	Intergenic	Intergenic	8181	LOC115717783	LOC115717783	XM_030646758	uncharacterized LOC115717783	protein_coding	NA	NA	NA	NA	NA	NA
1.7931366460972717e-05-3	NC_044377.1	34413001	34413799	+	84.5933	798	Intergenic	Intergenic	5380	LOC115695113	LOC115695113	XM_030622203	putative G-type lectin S-receptor-like serine/threonine-protein kinase At1g61610	protein_coding	NA	NA	NA	NA	NA	NA
1.7931366460972717e-05	NC_044373.1	62241401	62242399	+	84.5933	998	Intergenic	Intergenic	24182	LOC115713560	LOC115713560	XM_030642044	CASP-like protein 4D1	protein_coding	NA	NA	NA	NA	NA	NA
7.819750778095534e-10	NC_044374.1	70470401	70471599	+	84.5561	1198	Intergenic	Intergenic	7162	LOC115717941	LOC115717941	XM_030646910	uncharacterized LOC115717941	protein_coding	NA	NA	NA	NA	NA	NA
3.51050021532312e-06	NC_044370.1	99982201	99983199	+	84.5249	998	Intergenic	Intergenic	-6083	LOC115703130	LOC115703130	XM_030630630	uncharacterized LOC115703130	protein_coding	-1.188497198	0.89310692	1	-6.154604856	5.79311E-06	9.4814E-05
3.51050021532312e-06-4	NC_044375.1	76154801	76155599	+	84.5249	798	Intergenic	Intergenic	27663	LOC115721319	LOC115721319	XM_030650593	DNA (cytosine-5)-methyltransferase CMT2-like	protein_coding	0	1	NA	-3.926055215	0.457606366	1
3.51050021532312e-06-3	NC_044375.1	43770601	43771399	+	84.5249	798	Intergenic	Intergenic	-23995	LOC115721317	LOC115721317	XM_030650591	tropomyosin-2-like	protein_coding	1.940454338	0.414144069	1	1.706036753	0.502563852	1
3.51050021532312e-06-2	NC_044372.1	36669001	36670199	+	84.5249	1198	intron	-intron (LOC115710663, intron 1 of 1)	8646	LOC115710663	LOC115710663	XM_030639018	uncharacterized LOC115710663	protein_coding	NA	NA	NA	NA	NA	NA
0.0005951815177351302	NC_044374.1	59410801	59411199	+	84.5249	398	Intergenic	Intergenic	57883	LOC115718308	LOC115718308	XR_004011887	small nucleolar RNA R71	snoRNA	NA	NA	NA	NA	NA	NA
1.2264675203353304e-17	NC_044377.1	42886201	42889399	+	84.5092	3198	TTS	-TTS (LOC115695200)	1173	LOC115695200	LOC115695200	XM_030622285	uncharacterized LOC115695200	protein_coding	NA	NA	NA	NA	NA	NA
4.643846219405921e-09	NC_044372.1	62796801	62797599	+	84.4904	798	Intergenic	Intergenic	-6113	LOC115710842	LOC115710842	XM_030639196	uncharacterized LOC115710842	protein_coding	NA	NA	NA	NA	NA	NA
6.941006400961629e-07	NC_044371.1	329201	330199	+	84.4755	998	Intergenic	Intergenic	5679	LOC115706091	LOC115706091	XM_030633612	uncharacterized LOC115706091	protein_coding	NA	NA	NA	NA	NA	NA
6.941006400961629e-07-4	NC_044379.1	21600201	21601599	+	84.4755	1398	Intergenic	Intergenic	8187	LOC115700995	LOC115700995	XR_004008478	uncharacterized LOC115700995	lncRNA	0	1	NA	-0.998328082	1	NA
6.941006400961629e-07-2	NC_044373.1	66595401	66596399	+	84.4755	998	TTS	-TTS (LOC115715426)	986	LOC115715426	LOC115715426	XR_004011297	small nucleolar RNA R71	snoRNA	NA	NA	NA	NA	NA	NA
6.941006400961629e-07-3	NC_044377.1	18636601	18637599	+	84.4755	998	Intergenic	Intergenic	-6087	LOC115725481	LOC115725481	XM_030655018	truncated FRIGIDA-like protein 1	protein_coding	-0.244597529	1	1	-0.101123783	1	1
2.0051205437505603e-15-2	NC_044377.1	16860001	16862799	+	84.452	2798	Intergenic	Intergenic	-53361	LOC115696122	LOC115696122	XR_004007717	small nucleolar RNA R71	snoRNA	NA	NA	NA	NA	NA	NA
2.0051205437505603e-15	NC_044376.1	35630601	35633599	+	84.452	2998	Intergenic	Intergenic	8637	LOC115721905	LOC115721905	XM_030651009	uncharacterized protein YwkD	protein_coding	-1.171752723	0.53873479	1	-1.193552855	0.486838177	1
1.3828424458956715e-07	NC_044376.1	6158001	6158999	+	84.4383	998	Intergenic	Intergenic	52603	LOC115723511	LOC115723511	XM_030653007	#N/A	protein_coding	-1.066256768	0.785887335	1	-0.077102448	1	1
1.1614854485774908e-21	NC_044371.1	14221601	14225599	+	84.4008	3998	Intergenic	Intergenic	46169	LOC115704954	LOC115704954	XR_004009362	uncharacterized LOC115704954	lncRNA	0.196411139	1	1	0.261751886	1	1
2.1661341801645474e-05	NC_044372.1	12002001	12002799	+	84.3857	798	Intergenic	Intergenic	-41806	LOC115709290	LOC115709290	XM_030637356	homeobox-leucine zipper protein HAT5	protein_coding	-0.967046059	1	1	0.185688447	1	1
2.1661341801645474e-05-2	NC_044372.1	73180601	73181399	+	84.3857	798	Intergenic	Intergenic	-44706	LOC115711788	LOC115711788	XR_004010663	small nucleolar RNA R71	snoRNA	NA	NA	NA	NA	NA	NA
1.1288525070659706e-09-3	NC_044377.1	43306201	43307999	+	84.3665	1798	Intergenic	Intergenic	-246881	LOC115695201	LOC115695201	XM_030622286	uncharacterized LOC115695201	protein_coding	NA	NA	NA	NA	NA	NA
1.1288525070659706e-09	NC_044371.1	81077601	81079399	+	84.3665	1798	Intergenic	Intergenic	11192	LOC115705965	LOC115705965	XM_030633465	uncharacterized LOC115705965	protein_coding	-1.092081772	0.817535027	1	0.8427046	1	1
1.1288525070659706e-09-2	NC_044372.1	37135401	37136999	+	84.3665	1598	Intergenic	Intergenic	-87709	LOC115709598	LOC115709598	XM_030637732	serine/threonine protein phosphatase 2A 57 kDa regulatory subunit B' beta isoform	protein_coding	-0.439821567	1	1	-0.915614782	1	1
6.562898560117156e-113	NC_044370.1	104966401	104987199	+	84.3592	20798	Intergenic	Intergenic	14759	LOC115697014	LOC115697014	XM_030623917	uncharacterized LOC115697014	protein_coding	-0.332111334	1	1	0.165292202	1	1
4.234115998635036e-06-2	NC_044375.1	30736601	30737799	+	84.3504	1198	intron	-intron (LOC115721403, intron 1 of 1)	3335	LOC115721403	LOC115721403	XM_030650689	uncharacterized protein At2g29880,	protein_coding	0.374376113	1	NA	0.925217262	1	NA
4.234115998635036e-06	NC_044373.1	16074401	16075199	+	84.3504	798	Intergenic	Intergenic	-8357	LOC115712602	LOC115712602	XM_030640905	flavonoid 3',5'-methyltransferase	protein_coding	1.62766131	0.278243939	0.996208534	-6.744386867	4.13484E-46	1.40014E-43
4.6612179750429237e-11	NC_044373.1	9046401	9047799	+	84.3368	1398	Intergenic	Intergenic	90192	LOC115712135	LOC115712135	XM_030640378	calmodulin-7	protein_coding	1.237670968	0.453688337	1	0.409051784	1	1
9.509212702467815e-12	NC_044374.1	14805601	14807599	+	84.3251	1998	Intergenic	Intergenic	-7911	LOC115718220	LOC115718220	XR_004011804	small nucleolar RNA R71	snoRNA	NA	NA	NA	NA	NA	NA
8.36201610487417e-07-3	NC_044375.1	92630001	92630999	+	84.3251	998	Intergenic	Intergenic	-12079	LOC115719708	LOC115719708	XM_030648856	protein transport protein Sec61 subunit beta	protein_coding	2.418101495	2.00131E-11	5.44146E-10	0.405100677	1	1
8.36201610487417e-07-5	NC_044378.1	41563001	41563999	+	84.3251	998	Intergenic	Intergenic	-37435	LOC115696575	LOC115696575	XM_030623469	uncharacterized LOC115696575	protein_coding	NA	NA	NA	NA	NA	NA
8.36201610487417e-07-2	NC_044373.1	25325601	25326599	+	84.3251	998	Intergenic	Intergenic	-19728	LOC115713277	LOC115713277	XM_030641758	uncharacterized LOC115713277	protein_coding	NA	NA	NA	NA	NA	NA
8.36201610487417e-07	NC_044372.1	37413201	37414599	+	84.3251	1398	Intergenic	Intergenic	-7833	LOC115709230	LOC115709230	XM_030637278	glycine-rich RNA-binding protein RZ1B,	protein_coding	-0.18483605	1	1	-0.114671834	1	1
8.36201610487417e-07-4	NC_044376.1	45913801	45914799	+	84.3251	998	Intergenic	Intergenic	15970	LOC115723865	LOC115723865	XM_030653330	uncharacterized LOC115723865	protein_coding	NA	NA	NA	NA	NA	NA
1.013354967912262e-27	NC_044378.1	34286201	34292199	+	84.3168	5998	Intergenic	Intergenic	-65562	LOC115698290	LOC115698290	XM_030625504	organelle RRM domain-containing protein 6, chloroplastic	protein_coding	-0.972473404	1	1	0.011629265	1	1
3.982539566100327e-13	NC_044379.1	19770201	19772999	+	84.306	2798	Intergenic	Intergenic	-12442	LOC115698820	LOC115698820	XM_030626011	ubiquitin carboxyl-terminal hydrolase 5,	protein_coding	0.095649849	1	1	-0.233172224	1	1
1.6644479206628636e-07-2	NC_044378.1	65024601	65025599	+	84.306	998	exon	-exon (LOC115696732, exon 2 of 4)	548	LOC115696732	LOC115696732	XM_030623618	uncharacterized LOC115696732	protein_coding	NA	NA	NA	NA	NA	NA
1.6644479206628636e-07	NC_044372.1	68587401	68588599	+	84.306	1198	Intergenic	Intergenic	-13155	LOC115711728	LOC115711728	XR_004010607	small nucleolar RNA R71	snoRNA	NA	NA	NA	NA	NA	NA
1.6644479206628636e-07-3	NC_044379.1	60973801	60975999	+	84.306	2198	Intergenic	Intergenic	-3018	LOC115701643	LOC115701643	XR_004008634	small nucleolar RNA R71	snoRNA	NA	NA	NA	NA	NA	NA
3.333635278373825e-08	NC_044371.1	39000001	39001199	+	84.2911	1198	Intergenic	Intergenic	-32075	LOC115704231	LOC115704231	XM_030631447	protein DETOXIFICATION 51	protein_coding	0.351137939	1	1	0.254961137	1	1
3.333635278373825e-08-2	NC_044375.1	83253401	83254799	+	84.2911	1398	Intergenic	Intergenic	-16074	LOC115721253	LOC115721253	XM_030650510	uncharacterized protein At5g39865,	protein_coding	0.70302185	1	1	0.388958017	1	1
3.333635278373825e-08-3	NC_044377.1	56961001	56961999	+	84.2911	998	Intergenic	Intergenic	43116	LOC115696010	LOC115696010	XR_004007612	small nucleolar RNA R71	snoRNA	NA	NA	NA	NA	NA	NA
1.3563039165890104e-09	NC_044372.1	55547001	55548599	+	84.2694	1598	Intergenic	Intergenic	36446	LOC115710780	LOC115710780	XM_030639130	uncharacterized LOC115710780	protein_coding	NA	NA	NA	NA	NA	NA
5.942782999458296e-22	NC_044371.1	54787801	54791999	+	84.2084	4198	Intergenic	Intergenic	-121573	LOC115704145	LOC115704145	XM_030631362	uncharacterized LOC115704145	protein_coding	NA	NA	NA	NA	NA	NA
0.0001360919766759935-3	NC_044372.1	54901001	54901599	+	84.1709	598	Intergenic	Intergenic	-10266	LOC115709766	LOC115709766	XR_004010285	uncharacterized LOC115709766	lncRNA	NA	NA	NA	NA	NA	NA
2.616977869212873e-05-3	NC_044378.1	44496001	44496999	+	84.1709	998	Intergenic	Intergenic	17127	LOC115697163	LOC115697163	XM_030624072	probable LRR receptor-like serine/threonine-protein kinase At1g56140	protein_coding	0.174749446	1	1	1.287670291	0.173880657	0.91335012
2.0034352547707435e-07	NC_044379.1	51797801	51798999	+	84.1709	1198	Intergenic	Intergenic	33774	LOC115701657	LOC115701657	XR_004008648	small nucleolar RNA R71	snoRNA	NA	NA	NA	NA	NA	NA
2.4147310804700956e-14	NC_044379.1	973601	975999	+	84.1709	2398	Intergenic	Intergenic	-561997	LOC115698860	LOC115698860	XM_030626068	amino acid transporter AVT1I	protein_coding	-1.967867848	0.196163411	0.757198644	1.423663466	0.584848218	1
8.06625302604168e-09	NC_044376.1	32044601	32046199	+	84.1709	1598	Intergenic	Intergenic	17326	LOC115723345	LOC115723345	XM_030652788	protein SIEVE ELEMENT OCCLUSION B	protein_coding	1.390095979	0.392406908	1	-2.395167337	0.002147994	0.021721483
2.616977869212873e-05-2	NC_044375.1	76313001	76313799	+	84.1709	798	Intergenic	Intergenic	-73005	LOC115720359	LOC115720359	XM_030649511	uncharacterized LOC115720359	protein_coding	NA	NA	NA	NA	NA	NA
0.0001360919766759935-2	NC_044372.1	2383401	2383999	+	84.1709	598	intron	-intron (LOC115709540, intron 1 of 3)	3176	LOC115709540	LOC115709540	XM_030637663	uncharacterized LOC115709540	protein_coding	-0.587400059	1	NA	-0.989954258	1	NA
0.0001360919766759935	NC_044371.1	8806001	8806599	+	84.1709	598	Intergenic	Intergenic	-38952	LOC115706491	LOC115706491	XM_030634153	cucumisin	protein_coding	-5.666501873	1.98193E-17	1.02969E-15	-5.739516086	6.09527E-18	3.45986E-16
0.0001360919766759935-4	NC_044379.1	51586601	51587199	+	84.1709	598	Intergenic	Intergenic	13934	LOC115701404	LOC115701404	XM_030629190	uncharacterized LOC115701404	protein_coding	0.615846576	1	1	-0.018726445	1	1
2.616977869212873e-05	NC_044373.1	18034601	18035399	+	84.1709	798	Intergenic	Intergenic	-65889	LOC115713207	LOC115713207	XM_030641691	uncharacterized LOC115713207	protein_coding	NA	NA	NA	NA	NA	NA
1.0074275065845731e-06-2	NC_044374.1	64643401	64644399	+	84.1709	998	Intergenic	Intergenic	-21989	LOC115717905	LOC115717905	XM_030646873	L10-interacting MYB domain-containing protein-like	protein_coding	NA	NA	NA	NA	NA	NA
5.1071822316720194e-06-2	NC_044370.1	51115201	51115799	+	84.1709	598	Intergenic	Intergenic	-35870	LOC115711963	LOC115711963	XM_030640165	caffeoylshikimate esterase	protein_coding	-1.20175466	0.240398979	0.887669587	0.033312334	1	1
1.0074275065845731e-06	NC_044371.1	22179801	22180599	+	84.1709	798	Intergenic	Intergenic	1235	LOC115708437	LOC115708437	XR_004009937	small nucleolar RNA R71	snoRNA	NA	NA	NA	NA	NA	NA
5.1071822316720194e-06	NC_044370.1	49850201	49851199	+	84.1709	998	Intergenic	Intergenic	3325	LOC115721323	LOC115721323	XM_030650597	uncharacterized LOC115721323	protein_coding	2.6977427	0.551665726	1	2.27200243	0.647354272	1
5.1071822316720194e-06-4	NW_022060476.1	817201	817999	+	84.1709	798	Intergenic	Intergenic	85800	LOC115702188	LOC115702188	XM_030629636	#N/A	protein_coding	NA	NA	NA	NA	NA	NA
5.1071822316720194e-06-3	NC_044375.1	60908801	60909799	+	84.1709	998	Intergenic	Intergenic	-30580	LOC115718972	LOC115718972	XM_030647806	probable protein phosphatase 2C 33,	protein_coding	-1.143618233	0.391870789	1	-0.566228215	1	1
6.874736274448308e-13	NC_044371.1	51724001	51726399	+	84.1022	2398	Intergenic	Intergenic	139103	LOC115705418	LOC115705418	XR_004009460	uncharacterized LOC115705418	lncRNA	NA	NA	NA	NA	NA	NA
3.358453758339709e-12	NC_044375.1	33698401	33700599	+	84.0976	2198	Intergenic	Intergenic	-14421	LOC115720665	LOC115720665	XM_030649828	germin-like protein subfamily 1 member 17	protein_coding	NA	NA	NA	NA	NA	NA
3.358453758339709e-12-2	NC_044378.1	47896201	47898999	+	84.0976	2798	Intergenic	Intergenic	41753	LOC115698399	LOC115698399	XR_004008148	small nucleolar RNA R71	snoRNA	NA	NA	NA	NA	NA	NA
4.822799830381929e-08	NC_044378.1	40005201	40006599	+	84.0482	1398	Intergenic	Intergenic	28037	LOC115696565	LOC115696565	XM_030623458	uncharacterized mitochondrial protein AtMg00810-like	protein_coding	NA	NA	NA	NA	NA	NA
1.2137549232810851e-06	NC_044377.1	66136601	66137599	+	84.0127	998	Intergenic	Intergenic	32740	LOC115695389	LOC115695389	XM_030622455	uncharacterized LOC115695389	protein_coding	NA	NA	NA	NA	NA	NA
6.160632120357314e-06-2	NC_044377.1	58336001	58336799	+	83.986	798	Intergenic	Intergenic	-56820	LOC115724685	LOC115724685	XM_030654024	vicianin hydrolase	protein_coding	3.448208057	0.063337763	0.302720493	-2.629489952	0.007425385	0.064216011
6.160632120357314e-06	NC_044377.1	25243601	25244799	+	83.986	1198	Intergenic	Intergenic	18774	LOC115695061	LOC115695061	XM_030622158	uncharacterized LOC115695061	protein_coding	NA	NA	NA	NA	NA	NA
2.3523694895245736e-09	NC_044373.1	61753801	61755399	+	83.9689	1598	Intergenic	Intergenic	5621	LOC115715004	LOC115715004	XR_004011159	uncharacterized LOC115715004	lncRNA	NA	NA	NA	NA	NA	NA
2.3523694895245736e-09-2	NC_044379.1	1953201	1954599	+	83.9689	1398	Intergenic	Intergenic	-835889	LOC115698919	LOC115698919	XM_030626122	extracellular ribonuclease LE	protein_coding	2.667802986	0.007814691	0.050323215	-3.483828726	2.07725E-15	9.57681E-14
3.16197646749331e-05-3	NC_044379.1	5342601	5343199	+	83.9484	598	Intergenic	Intergenic	-56780	LOC115701194	LOC115701194	XM_030628916	39S ribosomal protein L28, mitochondrial	protein_coding	0.02710153	1	1	0.319866486	1	1
3.16197646749331e-05-2	NC_044377.1	69447601	69448399	+	83.9484	798	Intergenic	Intergenic	14097	LOC115695423	LOC115695423	XM_030622488	rust resistance kinase Lr10-like	protein_coding	NA	NA	NA	NA	NA	NA
3.16197646749331e-05	NC_044371.1	66229801	66230799	+	83.9484	998	exon	-exon (LOC115704256, exon 3 of 9)	902	LOC115704256	LOC115704256	XM_030631472	uncharacterized LOC115704256	protein_coding	0.773129796	1	1	0.418906581	1	1
2.0996359458655123e-21	NC_044375.1	66151001	66154799	+	83.9406	3798	intron	-intron (LOC115720264, intron 1 of 2)	1079	LOC115720264	LOC115720264	XM_030649419	uncharacterized LOC115720264	protein_coding	0.347791196	1	1	0.642392371	1	1
5.8008875550548324e-08	NC_044375.1	50731201	50732599	+	83.9232	1398	Intergenic	Intergenic	6608	LOC115720168	LOC115720168	XM_030649326	uncharacterized LOC115720168	protein_coding	NA	NA	NA	NA	NA	NA
1.1625107377484145e-10	NW_022060417.1	834601	836599	+	83.9135	1998	Intergenic	Intergenic	-51682	LOC115702074	LOC115702074	XR_004008792	#N/A	lncRNA	NA	NA	NA	NA	NA	NA
5.722847156006532e-10	NC_044372.1	62089001	62091199	+	83.8915	2198	Intergenic	Intergenic	-125181	LOC115711226	LOC115711226	XR_004010435	uncharacterized LOC115711226,	lncRNA	NA	NA	NA	NA	NA	NA
0.00016482283075624758-2	NC_044373.1	72161401	72161999	+	83.8915	598	Intergenic	Intergenic	-8057	LOC115713063	LOC115713063	XM_030641543	GLABRA2 expression modulator	protein_coding	0.63172683	1	1	0.187140044	1	1
2.902740720228618e-07-3	NC_044377.1	25292401	25293599	+	83.8915	1198	Intergenic	Intergenic	-23286	LOC115695853	LOC115695853	XR_004007570	uncharacterized LOC115695853	lncRNA	NA	NA	NA	NA	NA	NA
0.00016482283075624758-3	NC_044373.1	81847001	81847999	+	83.8915	998	Intergenic	Intergenic	2254	LOC115713759	LOC115713759	XM_030642240	uncharacterized LOC115713759	protein_coding	NA	NA	NA	NA	NA	NA
0.00016482283075624758-4	NC_044378.1	59764001	59764599	+	83.8915	598	Intergenic	Intergenic	-2987	LOC115698358	LOC115698358	XR_004008110	small nucleolar RNA R71	snoRNA	NA	NA	NA	NA	NA	NA
0.00016482283075624758	NC_044371.1	42875601	42876199	+	83.8915	598	Intergenic	Intergenic	-44627	LOC115704859	LOC115704859	XM_030632069	S-norcoclaurine synthase	protein_coding	-5.221735852	NA	NA	-2.07050346	NA	NA
2.902740720228618e-07	NC_044371.1	61995601	61996599	+	83.8915	998	Intergenic	Intergenic	-4810	LOC115705001	LOC115705001	XM_030632231	AP-4 complex subunit sigma,	protein_coding	0.329452539	1	1	0.243646063	1	1
2.902740720228618e-07-2	NC_044372.1	54984001	54985799	+	83.8915	1798	intron	-intron (LOC115709761, intron 2 of 3)	-4035	LOC115709761	LOC115709761	XM_030637963	uncharacterized LOC115709761,	protein_coding	NA	NA	NA	NA	NA	NA
5.847923704660838e-20	NC_044375.1	43888001	43891599	+	83.8809	3598	Intergenic	Intergenic	94805	LOC115721317	LOC115721317	XM_030650591	tropomyosin-2-like	protein_coding	1.940454338	0.414144069	1	1.706036753	0.502563852	1
2.8262956849654505e-09	NC_044379.1	33203401	33204799	+	83.8655	1398	Intergenic	Intergenic	15765	LOC115700775	LOC115700775	XM_030628415	protein BIG GRAIN 1-like E	protein_coding	1.983830971	0.068072664	0.320725691	2.373169457	0.010735244	0.088365546
3.227316763213099e-23	NC_044376.1	45357401	45361599	+	83.8557	4198	promoter-TSS	-promoter-TSS (TRNAN-GUU_11)	-53	LOC115723856	LOC115723856	XM_030653321	uncharacterized mitochondrial protein AtMg00370	protein_coding	NA	NA	NA	NA	NA	NA
3.227316763213099e-23-2	NW_022060484.1	29201	33999	+	83.8557	4798	Intergenic	Intergenic	33356	TRNAC-GCA_10	TRNAC-GCA_10	TRNAC-GCA_10	#N/A	tRNA	NA	NA	NA	NA	NA	NA
1.46238842976099e-06	NC_044371.1	54724001	54724799	+	83.8506	798	Intergenic	Intergenic	-187073	LOC115704145	LOC115704145	XM_030631362	uncharacterized LOC115704145	protein_coding	NA	NA	NA	NA	NA	NA
1.46238842976099e-06-2	NC_044377.1	50270201	50270999	+	83.8506	798	Intergenic	Intergenic	4811	LOC115695915	LOC115695915	XM_030623010	mediator of RNA polymerase II transcription subunit 20a,	protein_coding	0.570903481	1	1	0.199910414	1	1
1.46238842976099e-06-3	NC_044377.1	78705201	78706199	+	83.8506	998	Intergenic	Intergenic	43654	LOC115695595	LOC115695595	XM_030622651	uncharacterized LOC115695595	protein_coding	NA	NA	NA	NA	NA	NA
6.977383871686615e-08-3	NW_022060454.1	1241201	1242799	+	83.7956	1598	Intergenic	Intergenic	-260192	LOC115702125	LOC115702125	XM_030629583	#N/A	protein_coding	-0.642329408	1	1	-3.285318001	4.96871E-05	0.000699547
7.431816709960274e-06-3	NC_044373.1	22865401	22866399	+	83.7956	998	Intergenic	Intergenic	10041	LOC115713253	LOC115713253	XM_030641736	uncharacterized LOC115713253	protein_coding	NA	NA	NA	NA	NA	NA
7.493827918390084e-16	NC_044376.1	17325001	17327999	+	83.7956	2998	exon	-exon (LOC115723624, exon 2 of 3)	442	LOC115723624	LOC115723624	XM_030653109	uncharacterized LOC115723624	protein_coding	1.845843604	0.702990769	NA	2.396687701	0.528960312	1
7.431816709960274e-06	NC_044371.1	39011201	39012199	+	83.7956	998	Intergenic	Intergenic	-20975	LOC115704231	LOC115704231	XM_030631447	protein DETOXIFICATION 51	protein_coding	0.351137939	1	1	0.254961137	1	1
6.977383871686615e-08-2	NC_044373.1	62357201	62358199	+	83.7956	998	Intergenic	Intergenic	24836	LOC115711930	LOC115711930	XM_030640126	uncharacterized LOC115711930,	protein_coding	-0.14306306	1	1	-1.149146135	0.59427052	1
7.431816709960274e-06-4	NC_044375.1	24663601	24664399	+	83.7956	798	Intergenic	Intergenic	-71585	LOC115721576	LOC115721576	XR_004012591	small nucleolar RNA R71	snoRNA	NA	NA	NA	NA	NA	NA
7.431816709960274e-06-2	NC_044371.1	68113401	68114199	+	83.7956	798	Intergenic	Intergenic	-21014	LOC115704279	LOC115704279	XM_030631493	uncharacterized LOC115704279	protein_coding	-0.510532929	1	1	1.184279605	0.820653356	1
6.977383871686615e-08	NC_044370.1	67841001	67842599	+	83.7956	1598	Intergenic	Intergenic	8456	LOC115713645	LOC115713645	XR_004011003	uncharacterized LOC115713645,	lncRNA	NA	NA	NA	NA	NA	NA
2.227051869388215e-22	NC_044373.1	3516401	3521399	+	83.7707	4998	Intergenic	Intergenic	8234	LOC115714878	LOC115714878	XR_004011141	uncharacterized LOC115714878	lncRNA	-1.549153872	0.892942769	NA	-1.881587592	0.827224586	NA
3.3956845707476715e-09	NC_044373.1	55298801	55300399	+	83.7604	1598	Intergenic	Intergenic	-38232	LOC115714572	LOC115714572	XR_004011079	uncharacterized LOC115714572	lncRNA	2.082512083	0.193519856	0.749945517	1.281771022	0.713226963	1
3.494105723147399e-07-2	NC_044374.1	31121201	31122199	+	83.7472	998	Intergenic	Intergenic	-32900	LOC115717703	LOC115717703	XM_030646683	hepatitis A virus cellular receptor 1-like	protein_coding	NA	NA	NA	NA	NA	NA
3.494105723147399e-07	NC_044373.1	71472201	71473399	+	83.7472	1198	Intergenic	Intergenic	10130	LOC115712662	LOC115712662	XM_030640983	protein GFS12,	protein_coding	0.794986059	1	1	-0.094049019	1	1
3.494105723147399e-07-3	NC_044377.1	26837001	26837999	+	83.7472	998	Intergenic	Intergenic	33161	LOC115696119	LOC115696119	XR_004007714	small nucleolar RNA R71	snoRNA	NA	NA	NA	NA	NA	NA
1.6754207655743353e-10	NW_022060454.1	513801	515599	+	83.7359	1798	Intergenic	Intergenic	10542	LOC115702127	LOC115702127	XM_030629586	#N/A	protein_coding	-1.214863418	0.74862229	1	-0.136444746	1	1
3.820870460264363e-05-2	NC_044375.1	54261001	54261799	+	83.7179	798	Intergenic	Intergenic	-98062	LOC115720200	LOC115720200	XM_030649356	uncharacterized LOC115720200	protein_coding	NA	NA	NA	NA	NA	NA
3.820870460264363e-05	NC_044371.1	44081801	44082399	+	83.7179	598	Intergenic	Intergenic	-11703	LOC115704941	LOC115704941	XM_030632158	LOB domain-containing protein 15	protein_coding	1.226210966	0.861718732	1	-2.336550323	0.241494381	1
1.6842206272237308e-08-2	NC_044376.1	58323601	58324599	+	83.7179	998	Intergenic	Intergenic	-2036	LOC115724297	LOC115724297	XR_004013095	small nucleolar RNA R71	snoRNA	NA	NA	NA	NA	NA	NA
3.820870460264363e-05-3	NC_044378.1	53274801	53275399	+	83.7179	598	Intergenic	Intergenic	-70873	LOC115696649	LOC115696649	XM_030623540	uncharacterized LOC115696649	protein_coding	NA	NA	NA	NA	NA	NA
1.6842206272237308e-08	NC_044374.1	20829001	20830199	+	83.7179	1198	Intergenic	Intergenic	19508	LOC115718335	LOC115718335	XR_004011914	small nucleolar RNA R71	snoRNA	NA	NA	NA	NA	NA	NA
1.6842206272237308e-08-3	NC_044377.1	27865401	27866799	+	83.7179	1398	Intergenic	Intergenic	211019	LOC115695672	LOC115695672	XM_030622734	stigma-specific STIG1-like protein 1	protein_coding	0	1	NA	-0.998328082	1	NA
1.6842206272237308e-08-4	NC_044377.1	42908801	42910199	+	83.7179	1398	Intergenic	Intergenic	-20527	LOC115695200	LOC115695200	XM_030622285	uncharacterized LOC115695200	protein_coding	NA	NA	NA	NA	NA	NA
8.253839608599909e-10	NC_044373.1	43643601	43645999	+	83.6983	2398	Intergenic	Intergenic	398807	LOC115713438	LOC115713438	XM_030641921	uncharacterized LOC115713438	protein_coding	0.374376113	1	NA	0.925217262	1	NA
1.7620132027033377e-06-3	NC_044373.1	27221401	27222399	+	83.6843	998	Intergenic	Intergenic	-15267	LOC115713298	LOC115713298	XM_030641775	Bowman-Birk type proteinase inhibitor D-II-like	protein_coding	0.374391768	1	1	-4.730835635	0.07002427	0.433431033
1.7620132027033377e-06	NC_044371.1	3955001	3955999	+	83.6843	998	Intergenic	Intergenic	-26204	LOC115705624	LOC115705624	XM_030633018	21 kDa protein	protein_coding	-0.6918074	1	1	-3.26009046	6.32273E-07	1.19402E-05
1.7620132027033377e-06-2	NC_044372.1	22180401	22180999	+	83.6843	598	Intergenic	Intergenic	18540	LOC115708791	LOC115708791	XM_030636803	Bowman-Birk type proteinase inhibitor 2,	protein_coding	5.148221093	0.004680985	0.032067917	-2.578593367	0.238435046	1
8.392544264269045e-08-3	NC_044379.1	196601	197999	+	83.6655	1398	Intergenic	Intergenic	166544	LOC115700627	LOC115700627	XM_030628235	protein sym-1	protein_coding	-0.016917343	1	1	0.164646111	1	1
8.392544264269045e-08-2	NC_044377.1	4298801	4299999	+	83.6655	1198	Intergenic	Intergenic	14524	LOC115724465	LOC115724465	XM_030653756	protein GLUTAMINE DUMPER 3	protein_coding	2.46984054	0.016627259	0.096476244	2.887188411	0.002095583	0.021258905
8.392544264269045e-08	NC_044376.1	53240401	53240999	+	83.6655	598	Intergenic	Intergenic	-473836	LOC115724380	LOC115724380	XR_004013173	small nucleolar RNA R71	snoRNA	NA	NA	NA	NA	NA	NA
4.079759982032309e-09	NC_044375.1	2927801	2929599	+	83.6536	1798	Intergenic	Intergenic	-17439	LOC115721404	LOC115721404	XR_004012453	uncharacterized LOC115721404	lncRNA	0.37438412	1	NA	-0.036563417	1	NA
8.965839927669816e-06-2	NC_044377.1	50909001	50909999	+	83.5995	998	Intergenic	Intergenic	-7493	LOC115696111	LOC115696111	XR_004007707	small nucleolar RNA R71	snoRNA	NA	NA	NA	NA	NA	NA
0.00019965648985272554	NC_044371.1	72010801	72011399	+	83.5995	598	Intergenic	Intergenic	10135	LOC115705629	LOC115705629	XM_030633023	centrin-1	protein_coding	0.176174471	1	1	-0.157857332	1	1
8.965839927669816e-06	NC_044370.1	33335001	33335999	+	83.5995	998	exon	-exon (LOC115719897, exon 1 of 1)	267	LOC115719897	LOC115719897	XM_030649081	protein FAR-RED IMPAIRED RESPONSE 1-like	protein_coding	NA	NA	NA	NA	NA	NA
0.00019965648985272554-3	NC_044376.1	35514201	35514799	+	83.5995	598	Intergenic	Intergenic	-7264	LOC115722994	LOC115722994	XM_030652388	uncharacterized LOC115722994,	protein_coding	-0.811606741	1	1	-0.308559355	1	1
0.00019965648985272554-5	NW_022060454.1	1148601	1149199	+	83.5995	598	Intergenic	Intergenic	-353292	LOC115702125	LOC115702125	XM_030629583	#N/A	protein_coding	-0.642329408	1	1	-3.285318001	4.96871E-05	0.000699547
0.00019965648985272554-4	NC_044379.1	26756401	26756999	+	83.5995	598	Intergenic	Intergenic	-10743	LOC115698824	LOC115698824	XM_030626015	TBCC domain-containing protein 1	protein_coding	-0.118000669	1	1	0.080152903	1	1
8.965839927669816e-06-3	NC_044378.1	16265601	16266199	+	83.5995	598	Intergenic	Intergenic	-3120	LOC115698403	LOC115698403	XR_004008152	small nucleolar RNA R71	snoRNA	NA	NA	NA	NA	NA	NA
4.206020213629853e-07	NC_044377.1	8983201	8984599	+	83.5995	1398	intron	-intron (LOC115694947, intron 1 of 1)	3748	LOC115694947	LOC115694947	XM_030622050	uncharacterized LOC115694947	protein_coding	NA	NA	NA	NA	NA	NA
0.00019965648985272554-2	NC_044375.1	41950401	41950999	+	83.5995	598	Intergenic	Intergenic	11605	LOC115718811	LOC115718811	XM_030647633	scarecrow-like protein 33	protein_coding	0	1	NA	-1.850786648	0.833284852	NA
2.024557840364293e-08	NC_044372.1	37192401	37194399	+	83.5995	1998	Intergenic	Intergenic	34879	LOC115710299	LOC115710299	XM_030638665	RHOMBOID-like protein 12, mitochondrial	protein_coding	-0.219517145	1	1	0.12052189	1	1
2.024557840364293e-08-2	NC_044375.1	65244801	65246399	+	83.5995	1598	Intergenic	Intergenic	-82021	LOC115718637	LOC115718637	XR_004011995	uncharacterized LOC115718637	lncRNA	0.523647405	1	1	-1.858331938	0.530699806	1
2.024557840364293e-08-3	NC_044377.1	38547001	38548599	+	83.5995	1598	Intergenic	Intergenic	-19296	LOC115695641	LOC115695641	XM_030622694	uncharacterized LOC115695641	protein_coding	0	1	NA	-1.850786648	0.833284852	NA
1.20192380969006e-11	NC_044377.1	42621201	42623199	+	83.5595	1998	Intergenic	Intergenic	-107463	LOC115694858	LOC115694858	XR_004007497	uncharacterized LOC115694858	lncRNA	NA	NA	NA	NA	NA	NA
1.0864043469686233e-25	NC_044372.1	1829401	1834399	+	83.5183	4998	intron	-intron (LOC115709523, intron 4 of 4)	7112	LOC115709013	LOC115709013	XM_030637033	anthocyanin 5-aromatic acyltransferase	protein_coding	-2.40771862	0.001524037	0.011943158	-2.289407264	0.003508716	0.033052528
2.123099702836792e-06-2	NC_044374.1	7551201	7552199	+	83.5136	998	exon	-exon (LOC115717002, exon 1 of 2)	465	LOC115717002	LOC115717002	XM_030645926	uncharacterized LOC115717002	protein_coding	NA	NA	NA	NA	NA	NA
5.894747086383827e-11	NC_044372.1	14174601	14177199	+	83.5136	2598	Intergenic	Intergenic	-190717	LOC115711308	LOC115711308	XM_030639644	protein STRICTOSIDINE SYNTHASE-LIKE 12-like	protein_coding	0	1	NA	-0.998328082	1	NA
2.123099702836792e-06	NC_044371.1	45633001	45633799	+	83.5136	798	Intergenic	Intergenic	4543	LOC115704085	LOC115704085	XM_030631304	uncharacterized LOC115704085	protein_coding	NA	NA	NA	NA	NA	NA
2.123099702836792e-06-3	NC_044378.1	22277001	22278199	+	83.5136	1198	Intergenic	Intergenic	-38574	LOC115696426	LOC115696426	XM_030623328	uncharacterized mitochondrial protein AtMg00810-like	protein_coding	NA	NA	NA	NA	NA	NA
4.61755787304772e-05-4	NC_044372.1	33174401	33174999	+	83.4789	598	Intergenic	Intergenic	26249	LOC115709392	LOC115709392	XM_030637484	kinesin-like protein KIN-14I,	protein_coding	1.025184827	0.944083493	1	-0.2739627	1	1
2.4336653698695995e-08-2	NC_044377.1	61581601	61582999	+	83.4789	1398	Intergenic	Intergenic	-13152	LOC115694763	LOC115694763	XR_004007460	uncharacterized LOC115694763	lncRNA	0	1	1	-5.605848843	0.037546035	0.259375353
4.61755787304772e-05-7	NC_044377.1	47424801	47425599	+	83.4789	798	Intergenic	Intergenic	-6565	LOC115695832	LOC115695832	XM_030622920	protein ENHANCED DOWNY MILDEW 2,	protein_coding	-0.260033918	1	1	0.270252664	1	1
4.61755787304772e-05	NC_044370.1	58641001	58641799	+	83.4789	798	Intergenic	Intergenic	-2583	LOC115712939	LOC115712939	XM_030641372	purine permease 3	protein_coding	0.900646399	1	1	0.858146582	1	1
4.61755787304772e-05-6	NC_044375.1	24653201	24653799	+	83.4789	598	Intergenic	Intergenic	-61085	LOC115721576	LOC115721576	XR_004012591	small nucleolar RNA R71	snoRNA	NA	NA	NA	NA	NA	NA
4.61755787304772e-05-2	NC_044370.1	75343601	75344799	+	83.4789	1198	Intergenic	Intergenic	22605	LOC115714510	LOC115714510	XM_030643249	serine/threonine-protein kinase tricorner,	protein_coding	0.175116974	1	1	0.199547111	1	1
2.4336653698695995e-08	NC_044375.1	95168401	95169999	+	83.4789	1598	Intergenic	Intergenic	-5078	LOC115720549	LOC115720549	XM_030649692	flavonoid 3'-monooxygenase	protein_coding	-3.803091874	0.013701689	0.081771988	-0.541369573	1	1
4.61755787304772e-05-5	NC_044374.1	55481201	55481999	+	83.4789	798	Intergenic	Intergenic	-13684	LOC115716880	LOC115716880	XM_030645794	F-box protein PP2-A12	protein_coding	-0.954585156	1	1	0.660076889	1	1
4.61755787304772e-05-3	NC_044371.1	34978201	34978999	+	83.4789	798	Intergenic	Intergenic	23984	LOC115704000	LOC115704000	XM_030631224	uncharacterized LOC115704000	protein_coding	NA	NA	NA	NA	NA	NA
5.888993245743096e-09	NC_044370.1	90416201	90418199	+	83.4345	1998	Intergenic	Intergenic	-24290	LOC115697552	LOC115697552	XR_004007956	uncharacterized LOC115697552	lncRNA	-0.995120658	1	1	1.211831218	0.658368554	1
5.480280303793915e-16	NC_044373.1	78541001	78544199	+	83.4345	3198	Intergenic	Intergenic	-19080	LOC115714331	LOC115714331	XM_030642994	beclin-1-like protein A,	protein_coding	0.946106018	1	1	1.484520949	0.130858694	0.728063669
1.1252827615865177e-21	NC_044372.1	80604401	80608399	+	83.4237	3998	exon	-exon (LOC115710994, exon 1 of 2)	866	LOC115710994	LOC115710994	XM_030639340	uncharacterized LOC115710994	protein_coding	0	1	NA	-0.998328082	1	NA
8.672299005964762e-13	NC_044373.1	7671001	7673599	+	83.4214	2598	Intergenic	Intergenic	-14066	LOC115713927	LOC115713927	XM_030642407	very-long-chain 3-oxoacyl-CoA reductase 1	protein_coding	0.156307158	1	1	0.040179498	1	1
1.0782106020712578e-14	NC_044372.1	57141201	57143599	+	83.4178	2398	Intergenic	Intergenic	-29252	LOC115710178	LOC115710178	XM_030638519	translation initiation factor eIF-2B subunit delta,	protein_coding	-0.867788618	1	1	-0.065098812	1	1
1.0817172144652779e-05-2	NC_044377.1	17070001	17070799	+	83.3973	798	Intergenic	Intergenic	-32277	LOC115695016	LOC115695016	XM_030622115	uncharacterized LOC115695016	protein_coding	NA	NA	NA	NA	NA	NA
1.4295219133924493e-09	NC_044372.1	53380201	53381799	+	83.3973	1598	Intergenic	Intergenic	68925	LOC115711745	LOC115711745	XR_004010623	small nucleolar RNA R71	snoRNA	NA	NA	NA	NA	NA	NA
1.2142378981308426e-07	NC_044370.1	62246401	62247599	+	83.3973	1198	Intergenic	Intergenic	-18551	LOC115722991	LOC115722991	XM_030652386	2-acylphloroglucinol 4-prenyltransferase-like	protein_coding	2.834741012	0.198953078	0.765813981	-5.734310354	5.52739E-09	1.34354E-07
1.0817172144652779e-05-3	NC_044379.1	203001	203799	+	83.3973	798	Intergenic	Intergenic	172644	LOC115700627	LOC115700627	XM_030628235	protein sym-1	protein_coding	-0.016917343	1	1	0.164646111	1	1
1.0817172144652779e-05	NC_044371.1	27095601	27096199	+	83.3973	598	Intergenic	Intergenic	-9997	LOC115704805	LOC115704805	XM_030632011	E3 ubiquitin-protein ligase DIS1	protein_coding	2.128099253	0.502600174	1	-0.61843055	1	1
1.2142378981308426e-07-2	NC_044379.1	9551201	9551999	+	83.3973	798	Intergenic	Intergenic	-15294	LOC115699811	LOC115699811	XM_030627354	uncharacterized mitochondrial protein AtMg00860-like	protein_coding	NA	NA	NA	NA	NA	NA
2.558271129842348e-06-3	NC_044379.1	33004601	33005599	+	83.3384	998	Intergenic	Intergenic	4799	LOC115700599	LOC115700599	XM_030628197	uncharacterized LOC115700599,	protein_coding	1.280238101	0.235623871	0.875245927	0.480716235	1	1
2.558271129842348e-06	NC_044375.1	69681001	69682399	+	83.3384	1398	Intergenic	Intergenic	36420	LOC115718707	LOC115718707	XR_004012009	uncharacterized LOC115718707	lncRNA	NA	NA	NA	NA	NA	NA
2.558271129842348e-06-2	NC_044377.1	20888601	20889599	+	83.3384	998	Intergenic	Intergenic	11069	LOC115725668	LOC115725668	XR_004013437	uncharacterized LOC115725668	lncRNA	-0.58739656	1	NA	-0.03655541	1	NA
2.555273405075564e-13	NC_044374.1	20151601	20153999	+	83.3285	2398	Intergenic	Intergenic	-21097	LOC115716964	LOC115716964	XR_004011638	uncharacterized LOC115716964,	lncRNA	4.013717681	0.026305574	0.143087734	-2.644459071	0.015959846	0.124731941
7.075218672457412e-09	NC_044376.1	57131201	57132799	+	83.3222	1598	intron	-intron (LOC115721842, intron 2 of 2)	-4982	LOC115721800	LOC115721800	XM_030650878	THO complex subunit 2	protein_coding	-0.282450716	1	1	-0.074501676	1	1
2.07537329500995e-11	NC_044372.1	78955401	78957599	+	83.3146	2198	Intergenic	Intergenic	-15427	LOC115708912	LOC115708912	XM_030636937	pentatricopeptide repeat-containing protein At1g06143	protein_coding	0.092525171	1	1	0.013797293	1	1
6.094869162337698e-07	NC_044374.1	82873601	82874399	+	83.2938	798	Intergenic	Intergenic	-7996	LOC115718085	LOC115718085	XM_030647048	N66 matrix protein-like	protein_coding	NA	NA	NA	NA	NA	NA
0.00024189890078700528	NC_044370.1	72342201	72342799	+	83.2938	598	Intergenic	Intergenic	16524	LOC115714343	LOC115714343	XM_030643021	protein FREE1	protein_coding	-0.518535404	1	1	-0.556988837	1	1
0.00024189890078700528-4	NC_044379.1	62400001	62400599	+	83.2938	598	Intergenic	Intergenic	-12916	LOC115698760	LOC115698760	XM_030625930	amino acid transporter AVT1I	protein_coding	2.49187723	0.045283887	0.227639165	-1.826129932	0.246425036	1
0.00024189890078700528-5	NW_022060511.1	17401	17999	+	83.2938	598	Intergenic	Intergenic	12096	LOC115702264	LOC115702264	XM_030629712	#N/A	protein_coding	0.714144228	1	1	1.0388707	0.952295831	1
0.00024189890078700528-3	NC_044377.1	56554801	56555399	+	83.2938	598	Intergenic	Intergenic	39019	LOC115724891	LOC115724891	XM_030654257	sodium transporter HKT1	protein_coding	-2.244782088	0.00393528	0.027538366	0.195394445	1	1
0.00024189890078700528-2	NC_044374.1	82512401	82512999	+	83.2938	598	TTS	-TTS (LOC115716479)	1984	LOC115716479	LOC115716479	XM_030645288	inositol polyphosphate multikinase beta-like	protein_coding	0	1	NA	-0.998328082	1	NA
1.4605372897122522e-07	NC_044375.1	15111401	15112599	+	83.259	1198	Intergenic	Intergenic	-13372	LOC115721444	LOC115721444	XR_004012467	small nucleolar RNA R71	snoRNA	NA	NA	NA	NA	NA	NA
1.4605372897122522e-07-2	NW_022060487.1	789201	790399	+	83.259	1198	NA	NA	NA	NA			#N/A		NA	NA	NA	NA	NA	NA
1.0187019622398239e-10	NC_044378.1	35086801	35088399	+	83.249	1598	Intergenic	Intergenic	-26359	LOC115698067	LOC115698067	XM_030625249	uncharacterized LOC115698067	protein_coding	0	1	1	-6.062980905	0.008986374	0.075715311
5.580974505982347e-05	NC_044374.1	12043601	12044599	+	83.231	998	Intergenic	Intergenic	-2639	LOC115717563	LOC115717563	XM_030646548	uncharacterized LOC115717563	protein_coding	NA	NA	NA	NA	NA	NA
5.580974505982347e-05-2	NC_044375.1	21551601	21552399	+	83.231	798	Intergenic	Intergenic	-2649	LOC115721642	LOC115721642	XR_004012649	small nucleolar RNA R71	snoRNA	NA	NA	NA	NA	NA	NA
2.4897470176260992e-11	NC_044377.1	43674201	43675999	+	83.231	1798	Intergenic	Intergenic	-428932	LOC115695668	LOC115695668	XM_030622727	uncharacterized protein At1g66480	protein_coding	3.167632037	5.83816E-07	8.59824E-06	3.239340754	1.76875E-07	3.63751E-06
1.3051600545910089e-05-5	NC_044379.1	1877201	1877999	+	83.1888	798	Intergenic	Intergenic	-912189	LOC115698919	LOC115698919	XM_030626122	extracellular ribonuclease LE	protein_coding	2.667802986	0.007814691	0.050323215	-3.483828726	2.07725E-15	9.57681E-14
1.3051600545910089e-05-4	NC_044376.1	38884201	38885199	+	83.1888	998	promoter-TSS	-promoter-TSS (LOC115724302)	-132	LOC115724302	LOC115724302	XR_004013100	small nucleolar RNA R71	snoRNA	NA	NA	NA	NA	NA	NA
1.3051600545910089e-05-3	NC_044375.1	27393001	27394199	+	83.1888	1198	Intergenic	Intergenic	-31558	LOC115721482	LOC115721482	XR_004012503	small nucleolar RNA R71	snoRNA	NA	NA	NA	NA	NA	NA
1.3051600545910089e-05	NC_044371.1	6453201	6453999	+	83.1888	798	Intergenic	Intergenic	-28393	LOC115703729	LOC115703729	XM_030630961	uncharacterized LOC115703729	protein_coding	NA	NA	NA	NA	NA	NA
1.3051600545910089e-05-2	NC_044374.1	19689201	19689999	+	83.1888	798	Intergenic	Intergenic	-164151	LOC115715846	LOC115715846	XR_004011463	uncharacterized LOC115715846	lncRNA	NA	NA	NA	NA	NA	NA
2.061537325738964e-09	NC_044379.1	21309601	21311199	+	83.1888	1598	Intergenic	Intergenic	73367	LOC115698728	LOC115698728	XM_030625874	uncharacterized endoplasmic reticulum membrane protein C16E8.02	protein_coding	0.448395781	1	1	1.032788667	0.874158406	1
3.082746607537256e-06-2	NC_044373.1	52876001	52876999	+	83.1584	998	Intergenic	Intergenic	-106656	LOC115713504	LOC115713504	XM_030641986	uncharacterized LOC115713504	protein_coding	NA	NA	NA	NA	NA	NA
3.082746607537256e-06	NC_044373.1	38536801	38537599	+	83.1584	798	TTS	-TTS (LOC115712093)	3501	LOC115712093	LOC115712093	XM_030640325	reticulon-like protein B22,	protein_coding	0.374396886	1	1	0.05120657	1	1
1.2224407813732635e-10	NC_044377.1	25479001	25480799	+	83.1584	1798	Intergenic	Intergenic	17883	LOC115724924	LOC115724924	XR_004013312	uncharacterized LOC115724924	lncRNA	NA	NA	NA	NA	NA	NA
3.082746607537256e-06-3	NC_044378.1	36540401	36541399	+	83.1584	998	Intergenic	Intergenic	-24969	LOC115696535	LOC115696535	XM_030623432	uncharacterized LOC115696535	protein_coding	NA	NA	NA	NA	NA	NA
1.7568062201387554e-07-2	NC_044375.1	74991801	74992999	+	83.1178	1198	Intergenic	Intergenic	-72057	LOC115720351	LOC115720351	XM_030649504	uncharacterized LOC115720351	protein_coding	NA	NA	NA	NA	NA	NA
1.7568062201387554e-07	NC_044370.1	41900401	41902399	+	83.1178	1998	Intergenic	Intergenic	7245	LOC115702469	LOC115702469	XR_004008887	uncharacterized LOC115702469	lncRNA	0	1	NA	-0.998328082	1	NA
4.227153223927443e-08	NC_044377.1	22284801	22286399	+	83.1035	1598	Intergenic	Intergenic	32882	LOC115725068	LOC115725068	XM_030654484	dicer-like protein 4,	protein_coding	0.670121473	1	1	0.764682211	1	1
9.891189179993835e-17	NC_044374.1	77510201	77513999	+	83.082	3798	Intergenic	Intergenic	37942	LOC115718006	LOC115718006	XM_030646974	uncharacterized LOC115718006	protein_coding	0	1	NA	-0.998328082	1	NA
2.4756198969008915e-09	NC_044378.1	45565201	45566799	+	83.082	1598	Intergenic	Intergenic	-10616	LOC115697291	LOC115697291	XM_030624234	ethylene response sensor 1,	protein_coding	1.000164167	0.999467688	1	1.331358268	0.177700328	0.929712279
1.466903518978876e-10	NC_044370.1	43918201	43920799	+	83.0666	2598	Intergenic	Intergenic	7964	LOC115720720	LOC115720720	XM_030649891	uncharacterized LOC115720720	protein_coding	NA	NA	NA	NA	NA	NA
5.277587920732667e-13	NC_044377.1	282801	284999	+	83.0461	2198	Intergenic	Intergenic	-32324	LOC115695619	LOC115695619	XM_030622676	heavy metal-associated isoprenylated plant protein 47-like	protein_coding	-2.999433104	0.380148295	NA	-3.745856045	0.208679766	1
5.019333944823652e-22-2	NC_044378.1	48366201	48368199	+	82.9736	1998	Intergenic	Intergenic	-58397	LOC115696615	LOC115696615	XM_030623510	uncharacterized LOC115696615	protein_coding	NA	NA	NA	NA	NA	NA
2.1131837630145622e-07	NC_044377.1	18042001	18042999	+	82.9736	998	Intergenic	Intergenic	61930	LOC115725666	LOC115725666	XM_030655251	benzyl alcohol O-benzoyltransferase	protein_coding	-0.813666622	1	1	-0.922250047	1	1
3.7148757264958493e-06	NC_044372.1	21210401	21211399	+	82.9736	998	Intergenic	Intergenic	27133	LOC115709313	LOC115709313	XM_030637390	flavonoid 3'-monooxygenase	protein_coding	-0.568572357	1	1	0.131256205	1	1
0.0002931380070923642	NC_044371.1	77498601	77498999	+	82.9736	398	promoter-TSS	-promoter-TSS (LOC115708454)	-1863	LOC115708454	LOC115708454	XR_004009953	small nucleolar RNA R71	snoRNA	NA	NA	NA	NA	NA	NA
0.0002931380070923642-2	NW_022060319.1	42801	43399	+	82.9736	598	promoter-TSS	-promoter-TSS (LOC115701855)	25	LOC115701855	LOC115701855	XR_004008773	#N/A	rRNA	0.374376113	1	NA	0.925217262	1	NA
7.2246181237248e-10	NC_044378.1	11003601	11005399	+	82.9736	1798	Intergenic	Intergenic	-17125	LOC115696341	LOC115696341	XM_030623245	uncharacterized LOC115696341	protein_coding	NA	NA	NA	NA	NA	NA
5.019333944823652e-22	NC_044378.1	48363201	48365399	+	82.9736	2198	Intergenic	Intergenic	-61297	LOC115696615	LOC115696615	XM_030623510	uncharacterized LOC115696615	protein_coding	NA	NA	NA	NA	NA	NA
8.832567337356741e-07-3	NW_022060340.1	199001	199999	+	82.9736	998	exon	-exon (LOC115701996, exon 1 of 3)	190	LOC115701996	LOC115701996	XM_030629463	#N/A	protein_coding	1.548840887	0.891299672	NA	2.099682037	0.784224685	NA
1.574858683590121e-05-3	NC_044375.1	64279001	64279799	+	82.9736	798	Intergenic	Intergenic	16654	LOC115720256	LOC115720256	XM_030649411	uncharacterized LOC115720256	protein_coding	NA	NA	NA	NA	NA	NA
2.1131837630145622e-07-2	NW_022060482.1	39801	41599	+	82.9736	1798	Intergenic	Intergenic	40530	LOC115702199	LOC115702199	XM_030629649	#N/A	protein_coding	NA	NA	NA	NA	NA	NA
3.7148757264958493e-06-2	NC_044373.1	14539401	14540399	+	82.9736	998	Intergenic	Intergenic	-87134	LOC115713375	LOC115713375	XM_030641857	DNA damage-repair/toleration protein DRT100	protein_coding	4.52192773	NA	NA	-2.548389806	NA	NA
6.7461616788983e-05-3	NC_044374.1	86521601	86522199	+	82.9736	598	promoter-TSS	-promoter-TSS (LOC115718239)	-1454	LOC115718239	LOC115718239	XR_004011823	small nucleolar RNA R71	snoRNA	NA	NA	NA	NA	NA	NA
8.832567337356741e-07-4	NW_022060424.1	15601	16599	+	82.9736	998	NA	NA	NA	NA			#N/A		NA	NA	NA	NA	NA	NA
6.7461616788983e-05-2	NC_044373.1	69656801	69657599	+	82.9736	798	Intergenic	Intergenic	-8945	LOC115713944	LOC115713944	XR_004011013	uncharacterized LOC115713944	lncRNA	-0.519733401	1	1	1.339083582	0.773419409	1
6.7461616788983e-05	NC_044371.1	28395401	28396199	+	82.9736	798	Intergenic	Intergenic	-19230	LOC115703971	LOC115703971	XM_030631196	uncharacterized LOC115703971	protein_coding	NA	NA	NA	NA	NA	NA
1.574858683590121e-05	NC_044370.1	14895001	14895799	+	82.9736	798	Intergenic	Intergenic	8969	LOC115717147	LOC115717147	XM_030646100	uncharacterized LOC115717147	protein_coding	NA	NA	NA	NA	NA	NA
8.832567337356741e-07	NC_044374.1	54685401	54686599	+	82.9736	1198	Intergenic	Intergenic	-8462	LOC115717853	LOC115717853	XM_030646823	uncharacterized LOC115717853	protein_coding	NA	NA	NA	NA	NA	NA
1.574858683590121e-05-2	NC_044373.1	66195401	66196199	+	82.9736	798	Intergenic	Intergenic	12199	LOC115713585	LOC115713585	XM_030642073	uncharacterized LOC115713585	protein_coding	NA	NA	NA	NA	NA	NA
8.832567337356741e-07-2	NC_044375.1	80228801	80229799	+	82.9736	998	Intergenic	Intergenic	-7045	LOC115718547	LOC115718547	XM_030647347	telomere repeat-binding protein 5,	protein_coding	-0.180546658	1	1	-0.22062724	1	1
3.768407379317361e-67	NC_044376.1	61521001	61534799	+	82.9736	13798	Intergenic	Intergenic	15059	LOC115722659	LOC115722659	XM_030651921	protein TIC 40, chloroplastic,	protein_coding	-0.454318497	1	1	0.010789331	1	1
5.1560358743331305e-11	NC_044370.1	54624401	54626399	+	82.8856	1998	Intergenic	Intergenic	-13095	LOC115721768	LOC115721768	XM_030650847	uncharacterized LOC115721768	protein_coding	NA	NA	NA	NA	NA	NA
2.1121623358790134e-10	NC_044378.1	49365201	49366999	+	82.8793	1798	Intergenic	Intergenic	-16460	LOC115697836	LOC115697836	XM_030624978	berberine bridge enzyme-like 26	protein_coding	2.677472906	0.002078299	0.015642577	-0.407931654	1	1
8.672090018207972e-10	NC_044372.1	69437801	69439399	+	82.872	1598	Intergenic	Intergenic	212506	LOC115709988	LOC115709988	XM_030638275	protein REVEILLE 8,	protein_coding	-1.300410455	0.180898031	0.713290437	-0.272255282	1	1
1.4740124220864314e-08	NC_044375.1	72988401	72989599	+	82.8533	1198	Intergenic	Intergenic	-3330	LOC115720917	LOC115720917	XM_030650124	uncharacterized LOC115720917,	protein_coding	0.530625091	1	1	0.140491181	1	1
2.541866290609732e-07-2	NC_044372.1	83604601	83605999	+	82.8263	1398	Intergenic	Intergenic	-3391	LOC115711710	LOC115711710	XM_030640098	#N/A	protein_coding	0.168546874	1	1	0.6594742	1	1
2.541866290609732e-07	NC_044372.1	1524001	1525399	+	82.8263	1398	intron	-intron (LOC115709517, intron 4 of 7)	2771	LOC115709517	LOC115709517	XM_030637633	uncharacterized LOC115709517	protein_coding	0.713631321	1	1	0.116356916	1	1
3.705004638466773e-12	NC_044377.1	24827401	24829199	+	82.8175	1798	Intergenic	Intergenic	40952	LOC115695060	LOC115695060	XM_030622157	uncharacterized LOC115695060	protein_coding	NA	NA	NA	NA	NA	NA
1.0633081897701217e-06	NC_044374.1	2875201	2876199	+	82.8077	998	intron	-intron (LOC115716219, intron 3 of 3)	-4272	LOC115716221	LOC115716221	XR_004011548	uncharacterized LOC115716221	lncRNA	-2.721909012	9.45799E-12	2.63113E-10	-0.714050952	1	1
4.476783299513484e-06-2	NC_044375.1	4923801	4924599	+	82.7836	798	Intergenic	Intergenic	6567	LOC115719791	LOC115719791	XM_030648979	uncharacterized LOC115719791	protein_coding	0	1	NA	-0.998328082	1	NA
4.476783299513484e-06-4	NW_022060516.1	50801	52399	+	82.7836	1598	NA	NA	NA	NA			#N/A		NA	NA	NA	NA	NA	NA
4.476783299513484e-06	NC_044374.1	40333201	40334199	+	82.7836	998	Intergenic	Intergenic	-12865	LOC115715797	LOC115715797	XR_004011445	uncharacterized LOC115715797	lncRNA	NA	NA	NA	NA	NA	NA
4.476783299513484e-06-3	NC_044378.1	29886401	29886999	+	82.7836	598	Intergenic	Intergenic	-42297	TRNAL-UAA_4	TRNAL-UAA_4	TRNAL-UAA_4	#N/A	tRNA	NA	NA	NA	NA	NA	NA
1.9004117626761575e-05-2	NC_044375.1	73812001	73812599	+	82.7515	598	Intergenic	Intergenic	9081	LOC115721453	LOC115721453	XR_004012475	small nucleolar RNA R71	snoRNA	NA	NA	NA	NA	NA	NA
1.9004117626761575e-05-3	NC_044376.1	47107201	47108199	+	82.7515	998	intron	-intron (LOC115724200, intron 16 of 21)	21579	LOC115724200	LOC115724200	XM_030653685	phospholipase SGR2,	protein_coding	-0.346969132	1	1	-0.570329398	1	1
1.9004117626761575e-05	NC_044373.1	3408201	3409199	+	82.7515	998	Intergenic	Intergenic	14450	LOC115714089	LOC115714089	XM_030642622	putative potassium transporter 12	protein_coding	-0.23126313	1	1	-0.316380416	1	1
1.1817697708096704e-15	NC_044371.1	55139001	55142399	+	82.7416	3398	Intergenic	Intergenic	217835	LOC115707541	LOC115707541	XM_030635546	tRNA:m(4)X modification enzyme TRM13,	protein_coding	0.007503496	1	1	0.385378342	1	1
1.1817697708096704e-15-2	NW_022060417.1	526801	529799	+	82.7416	2998	Intergenic	Intergenic	-8531	LOC115702073	LOC115702073	XR_004008791	#N/A	lncRNA	NA	NA	NA	NA	NA	NA
1.7708505311910487e-08-2	NC_044377.1	56282001	56283199	+	82.7309	1198	Intergenic	Intergenic	18805	LOC115695286	LOC115695286	XM_030622361	uncharacterized LOC115695286	protein_coding	NA	NA	NA	NA	NA	NA
1.7708505311910487e-08	NC_044373.1	88690001	88691399	+	82.7309	1398	Intergenic	Intergenic	-11660	LOC115712951	LOC115712951	XM_030641385	RPM1-interacting protein 4,	protein_coding	0.420435028	1	1	-0.093559965	1	1
1.8137195746769475e-11	NC_044374.1	22026001	22027999	+	82.7232	1998	Intergenic	Intergenic	45060	LOC115715633	LOC115715633	XM_030644291	uncharacterized LOC115715633	protein_coding	0.68641543	1	1	1.292343379	0.136124384	0.752034569
8.155561719367185e-05-5	NC_044374.1	70453601	70454399	+	82.7062	798	Intergenic	Intergenic	-20266	LOC115717125	LOC115717125	XM_030646070	protein HOTHEAD	protein_coding	0	1	NA	-0.998328082	1	NA
7.34215987404501e-08	NC_044374.1	25611401	25613199	+	82.7062	1798	Intergenic	Intergenic	37296	LOC115717673	LOC115717673	XM_030646655	RNA polymerase II subunit 5-mediating protein homolog	protein_coding	NA	NA	NA	NA	NA	NA
8.155561719367185e-05-3	NC_044372.1	12957201	12957999	+	82.7062	798	Intergenic	Intergenic	-9200	LOC115709646	LOC115709646	XM_030637807	protein NUCLEAR FUSION DEFECTIVE 2	protein_coding	2.027639824	0.001828492	0.01397023	0.150906132	1	1
8.155561719367185e-05-4	NC_044373.1	62013401	62013999	+	82.7062	598	Intergenic	Intergenic	2749	LOC115715378	LOC115715378	XR_004011253	small nucleolar RNA R71	snoRNA	-1.549169232	0.892939793	NA	0	1	NA
7.890238011235968e-14	NW_022060487.1	113001	115599	+	82.7062	2598	NA	NA	NA	NA			#N/A		NA	NA	NA	NA	NA	NA
8.155561719367185e-05	NC_044370.1	70137601	70138199	+	82.7062	598	Intergenic	Intergenic	-35054	LOC115723762	LOC115723762	XM_030653237	uncharacterized LOC115723762	protein_coding	NA	NA	NA	NA	NA	NA
8.155561719367185e-05-2	NC_044370.1	88482201	88482799	+	82.7062	598	Intergenic	Intergenic	17093	LOC115697135	LOC115697135	XM_030624051	WAT1-related protein At4g08290	protein_coding	-0.13666088	1	1	2.139905419	0.174453385	0.915134741
8.155561719367185e-05-6	NC_044376.1	18594201	18594999	+	82.7062	798	Intergenic	Intergenic	5032	LOC115723635	LOC115723635	XM_030653120	uncharacterized LOC115723635	protein_coding	NA	NA	NA	NA	NA	NA
3.0410440811776635e-10	NW_022060454.1	700601	701999	+	82.6867	1398	Intergenic	Intergenic	197142	LOC115702127	LOC115702127	XM_030629586	#N/A	protein_coding	-1.214863418	0.74862229	1	-0.136444746	1	1
3.0575248612309725e-07	NC_044378.1	18837801	18839199	+	82.6758	1398	Intergenic	Intergenic	-29355	LOC115697794	LOC115697794	XM_030624920	probable LRR receptor-like serine/threonine-protein kinase At1g29720,	protein_coding	3.114629875	NA	NA	6.22828013	NA	NA
1.3061441653070769e-12	NW_022060461.1	60001	62199	+	82.6758	2198	intron	-intron (LOC115702137, intron 12 of 30)	18142	LOC115702137	LOC115702137	XM_030629593	#N/A	protein_coding	NA	NA	NA	NA	NA	NA
1.2494558038576396e-09	NC_044377.1	40945001	40946599	+	82.6641	1598	Intergenic	Intergenic	-29992	LOC115725313	LOC115725313	XR_004013366	uncharacterized LOC115725313	lncRNA	NA	NA	NA	NA	NA	NA
2.1749918405289717e-11	NC_044373.1	66500801	66502599	+	82.6377	1798	Intergenic	Intergenic	36483	LOC115712496	LOC115712496	XM_030640781	retrotransposon-like protein 1,	protein_coding	-0.00681352	1	1	-0.291382827	1	1
5.14754865893532e-09	NC_044377.1	13574601	13575999	+	82.6377	1398	Intergenic	Intergenic	-30408	LOC115696126	LOC115696126	XR_004007721	small nucleolar RNA R71	snoRNA	NA	NA	NA	NA	NA	NA
1.2800841857341295e-06-2	NC_044372.1	27111801	27112799	+	82.6377	998	Intergenic	Intergenic	82251	LOC115711472	LOC115711472	XM_030639813	transcription factor PIF7,	protein_coding	0.176169755	1	1	3.062464797	1.92953E-05	0.000289503
5.14754865893532e-09-2	NC_044378.1	39080601	39081999	+	82.6377	1398	Intergenic	Intergenic	-12390	LOC115696556	LOC115696556	XM_030623451	uncharacterized LOC115696556	protein_coding	NA	NA	NA	NA	NA	NA
1.2800841857341295e-06-4	NC_044379.1	6675401	6676599	+	82.6377	1198	Intergenic	Intergenic	38526	LOC115699780	LOC115699780	XM_030627325	uncharacterized LOC115699780	protein_coding	-1.549169232	0.892939793	NA	0	1	NA
1.2800841857341295e-06-5	NC_044379.1	12019401	12020799	+	82.6377	1398	Intergenic	Intergenic	-8046	LOC115701013	LOC115701013	XR_004008486	uncharacterized LOC115701013	lncRNA	0.374388901	1	1	-4.710386711	0.039441045	0.269581127
1.2800841857341295e-06-3	NC_044378.1	48317201	48318199	+	82.6377	998	Intergenic	Intergenic	-107897	LOC115696615	LOC115696615	XM_030623510	uncharacterized LOC115696615	protein_coding	NA	NA	NA	NA	NA	NA
1.2800841857341295e-06	NC_044371.1	51823801	51825399	+	82.6377	1598	Intergenic	Intergenic	39703	LOC115705418	LOC115705418	XR_004009460	uncharacterized LOC115705418	lncRNA	NA	NA	NA	NA	NA	NA
2.127445224289682e-08	NC_044370.1	29619201	29620399	+	82.6063	1198	Intergenic	Intergenic	-13717	LOC115719596	LOC115719596	XM_030648696	uncharacterized LOC115719596	protein_coding	NA	NA	NA	NA	NA	NA
5.39514708099436e-06-2	NC_044372.1	21000201	21000999	+	82.5884	798	Intergenic	Intergenic	-153985	LOC115709738	LOC115709738	XM_030637923	uncharacterized LOC115709738,	protein_coding	-0.125932874	1	1	-0.140281253	1	1
5.39514708099436e-06	NC_044370.1	14249601	14250399	+	82.5884	798	Intergenic	Intergenic	-2357	LOC115703559	LOC115703559	XM_030630791	aluminum-activated malate transporter 13	protein_coding	4.749366952	4.31743E-07	6.50933E-06	8.5712349	6.61755E-14	2.70768E-12
5.012292315023248e-16	NC_044373.1	67780601	67783799	+	82.5801	3198	Intergenic	Intergenic	14039	LOC115715244	LOC115715244	XM_030644084	homeobox-leucine zipper protein ATHB-6	protein_coding	0.192934567	1	1	-0.258207623	1	1
8.825628475280686e-08	NW_022060451.1	87401	88799	+	82.5685	1398	NA	NA	NA	NA			#N/A		NA	NA	NA	NA	NA	NA
2.2934150799298763e-05-4	NC_044373.1	40455001	40455799	+	82.522	798	Intergenic	Intergenic	-23100	LOC115713418	LOC115713418	XM_030641899	uncharacterized LOC115713418	protein_coding	NA	NA	NA	NA	NA	NA
2.2934150799298763e-05-5	NC_044374.1	38325201	38326199	+	82.522	998	Intergenic	Intergenic	-5837	LOC115716717	LOC115716717	XM_030645593	protein P21	protein_coding	3.516203369	0.155866802	0.633988054	2.814609701	0.30412226	1
2.2934150799298763e-05-3	NC_044371.1	43175201	43175999	+	82.522	798	Intergenic	Intergenic	5405	LOC115704064	LOC115704064	XM_030631286	uncharacterized LOC115704064	protein_coding	0	1	1	-6.589151206	0.000887621	0.009843521
3.677807258167366e-07-3	NC_044372.1	20262001	20262999	+	82.522	998	Intergenic	Intergenic	-7716	LOC115710522	LOC115710522	XM_030638885	uncharacterized LOC115710522	protein_coding	NA	NA	NA	NA	NA	NA
2.2934150799298763e-05	NC_044371.1	11770401	11771399	+	82.522	998	Intergenic	Intergenic	16811	LOC115705643	LOC115705643	XM_030633044	AT-hook motif nuclear-localized protein 15	protein_coding	1.691807913	0.015898252	0.092767332	1.554932932	0.049776574	0.327837666
2.2934150799298763e-05-2	NC_044371.1	25710001	25710599	+	82.522	598	Intergenic	Intergenic	39806	LOC115708370	LOC115708370	XR_004009870	small nucleolar RNA R71	snoRNA	NA	NA	NA	NA	NA	NA
3.677807258167366e-07-2	NC_044372.1	16398201	16399599	+	82.522	1398	Intergenic	Intergenic	-14997	LOC115709950	LOC115709950	XM_030638220	uncharacterized LOC115709950,	protein_coding	0.126280602	1	1	0.196183203	1	1
2.2934150799298763e-05-6	NC_044375.1	6972401	6973199	+	82.522	798	Intergenic	Intergenic	-8807	LOC115721074	LOC115721074	XM_030650318	receptor-like kinase TMK3	protein_coding	5.301883234	0.001126486	0.009117662	2.274073086	0.077029285	0.469102375
3.677807258167366e-07-4	NC_044374.1	34679801	34680799	+	82.522	998	Intergenic	Intergenic	14377	LOC115717712	LOC115717712	XM_030646692	uncharacterized LOC115717712	protein_coding	NA	NA	NA	NA	NA	NA
3.677807258167366e-07	NC_044370.1	78556001	78557399	+	82.522	1398	Intergenic	Intergenic	-12695	LOC115719415	LOC115719415	XR_004012160	uncharacterized LOC115719415	lncRNA	1.253417175	0.894640829	NA	1.793705843	0.677995126	1
2.5558204404598018e-08	NC_044375.1	13461801	13463399	+	82.4795	1598	Intergenic	Intergenic	-4211	LOC115719205	LOC115719205	XM_030648158	uncharacterized LOC115719205	protein_coding	-1.159500397	0.49506613	1	-0.196012076	1	1
5.521155184965256e-13	NC_044377.1	61271601	61273799	+	82.4728	2198	Intergenic	Intergenic	14281	LOC115725634	LOC115725634	XM_030655214	protein OS-9 homolog	protein_coding	-0.005145773	1	1	0.146876722	1	1
1.5410792856087902e-06	NC_044372.1	30330401	30331999	+	82.4635	1598	Intergenic	Intergenic	-6238	LOC115710610	LOC115710610	XM_030638967	uncharacterized mitochondrial protein AtMg00860-like	protein_coding	NA	NA	NA	NA	NA	NA
1.5410792856087902e-06-2	NW_022060467.1	91401	92399	+	82.4635	998	Intergenic	Intergenic	-23653	LOC115702166	LOC115702166	XR_004008812	#N/A	lncRNA	1.774722815	0.665136808	1	-3.433634282	0.076375083	0.46584057
3.127557295550091e-11	NC_044375.1	1579401	1581799	+	82.4635	2398	Intergenic	Intergenic	3491	LOC115718611	LOC115718611	XM_030647427	uncharacterized LOC115718611	protein_coding	0	1	NA	-0.998328082	1	NA
1.8000681208774478e-09	NC_044370.1	66719601	66721399	+	82.4499	1798	Intergenic	Intergenic	-41508	LOC115702532	LOC115702532	XM_030629960	uncharacterized LOC115702532	protein_coding	-1.504985211	0.776384519	1	-2.441506602	0.390491965	1
9.860590131092932e-05-5	NC_044378.1	52397801	52398599	+	82.4281	798	Intergenic	Intergenic	-5611	LOC115696646	LOC115696646	XM_030623537	uncharacterized LOC115696646	protein_coding	NA	NA	NA	NA	NA	NA
9.860590131092932e-05-3	NC_044374.1	53703801	53704399	+	82.4281	598	Intergenic	Intergenic	-27622	LOC115718260	LOC115718260	XR_004011843	small nucleolar RNA R71	snoRNA	NA	NA	NA	NA	NA	NA
9.860590131092932e-05	NC_044373.1	3250601	3251799	+	82.4281	1198	Intergenic	Intergenic	-5846	LOC115712744	LOC115712744	XM_030641096	threonine--tRNA ligase, mitochondrial 1	protein_coding	0.611198674	1	1	0.798883356	1	1
9.860590131092932e-05-4	NC_044375.1	41620201	41620799	+	82.4281	598	Intergenic	Intergenic	13782	LOC115719519	LOC115719519	XM_030648596	hydroxymethylglutaryl-CoA lyase, mitochondrial	protein_coding	-1.256829897	0.08928034	0.402399994	-0.67016225	1	1
9.860590131092932e-05-6	NC_044379.1	45808201	45808799	+	82.4281	598	Intergenic	Intergenic	66395	LOC115700161	LOC115700161	XM_030627721	uncharacterized LOC115700161	protein_coding	NA	NA	NA	NA	NA	NA
9.860590131092932e-05-2	NC_044373.1	42800201	42800799	+	82.4281	598	Intergenic	Intergenic	-30108	LOC115713437	LOC115713437	XM_030641920	stress response protein NST1-like	protein_coding	-0.587400514	1	NA	-0.920448172	1	NA
9.176254577640039e-12	NC_044375.1	35365201	35367199	+	82.4114	1998	Intergenic	Intergenic	-13860	LOC115720049	LOC115720049	XM_030649214	uncharacterized LOC115720049	protein_coding	NA	NA	NA	NA	NA	NA
7.422029971618838e-09	NC_044371.1	18077601	18079199	+	82.4045	1598	Intergenic	Intergenic	-8127	LOC115706923	LOC115706923	XM_030634695	uncharacterized LOC115706923	protein_coding	-1.160797932	0.618482146	1	-1.549309279	0.080200179	0.48468956
6.502135902449017e-06-2	NC_044370.1	95602201	95602999	+	82.3875	798	Intergenic	Intergenic	6552	LOC115703448	LOC115703448	XR_004009211	small nucleolar RNA R71	snoRNA	-1.549169232	0.892939793	NA	0	1	NA
6.502135902449017e-06	NC_044370.1	87063601	87064399	+	82.3875	798	Intergenic	Intergenic	-26004	LOC115695657	LOC115695657	XM_030622719	protein MIZU-KUSSEI 1	protein_coding	3.398676062	9.38498E-06	0.000114983	-0.145036664	1	1
4.4239418378996274e-07-4	NC_044378.1	70176601	70177999	+	82.3649	1398	Intergenic	Intergenic	6922	LOC115696848	LOC115696848	XM_030623733	2-alkenal reductase (NADP(+)-dependent)	protein_coding	NA	NA	NA	NA	NA	NA
4.4239418378996274e-07-5	NC_044379.1	276201	277599	+	82.3649	1398	Intergenic	Intergenic	135903	LOC115698860	LOC115698860	XM_030626068	amino acid transporter AVT1I	protein_coding	-1.967867848	0.196163411	0.757198644	1.423663466	0.584848218	1
4.4239418378996274e-07-3	NC_044377.1	50536601	50537599	+	82.3649	998	Intergenic	Intergenic	55428	LOC115696075	LOC115696075	XR_004007673	small nucleolar RNA R71	snoRNA	NA	NA	NA	NA	NA	NA
4.4239418378996274e-07	NC_044371.1	54687201	54688199	+	82.3649	998	Intergenic	Intergenic	-223773	LOC115704145	LOC115704145	XM_030631362	uncharacterized LOC115704145	protein_coding	NA	NA	NA	NA	NA	NA
4.4239418378996274e-07-2	NC_044374.1	23492801	23493999	+	82.3649	1198	Intergenic	Intergenic	33629	LOC115717364	LOC115717364	XM_030646332	dehydration-responsive element-binding protein 1E-like	protein_coding	-1.627227466	0.338313853	1	-2.631081514	0.009905093	0.082465459
4.4239418378996274e-07-6	NW_022060485.1	20201	21599	+	82.3649	1398	Intergenic	Intergenic	-55583	LOC115702201	LOC115702201	XM_030629650	#N/A	protein_coding	NA	NA	NA	NA	NA	NA
3.070418004699126e-08-2	NC_044373.1	72774601	72775999	+	82.3504	1398	Intergenic	Intergenic	6698	LOC115713655	LOC115713655	XM_030642142	uncharacterized mitochondrial protein AtMg00820-like	protein_coding	NA	NA	NA	NA	NA	NA
3.070418004699126e-08	NC_044373.1	10391801	10393599	+	82.3504	1798	Intergenic	Intergenic	24420	LOC115715428	LOC115715428	XR_004011299	small nucleolar RNA R71	snoRNA	NA	NA	NA	NA	NA	NA
2.7678782855868596e-05-7	NC_044379.1	24637601	24638399	+	82.2849	798	Intergenic	Intergenic	106324	LOC115698927	LOC115698927	XR_004008257	uncharacterized LOC115698927	lncRNA	NA	NA	NA	NA	NA	NA
1.2752127098521824e-07	NC_044370.1	36194801	36196399	+	82.2849	1598	Intergenic	Intergenic	-6139	LOC115710452	LOC115710452	XM_030638817	40S ribosomal protein S15a-1	protein_coding	0.833543563	1	1	1.137657793	0.580213005	1
2.7678782855868596e-05-6	NC_044377.1	11140401	11141199	+	82.2849	798	Intergenic	Intergenic	-8501	LOC115695695	LOC115695695	XM_030622764	temperature-induced lipocalin-1	protein_coding	-0.034375019	1	1	-0.52105814	1	1
2.7678782855868596e-05-2	NC_044374.1	19937801	19938599	+	82.2849	798	Intergenic	Intergenic	84449	LOC115715846	LOC115715846	XR_004011463	uncharacterized LOC115715846	lncRNA	NA	NA	NA	NA	NA	NA
1.2752127098521824e-07-2	NC_044377.1	10609201	10610599	+	82.2849	1398	exon	-exon (LOC115694966, exon 3 of 4)	546	LOC115694966	LOC115694966	XM_030622068	uncharacterized LOC115694966	protein_coding	-1.503185481	0.615891815	1	-2.178266112	0.221020537	1
2.7678782855868596e-05	NC_044371.1	25826601	25827599	+	82.2849	998	Intergenic	Intergenic	-7896	LOC115705509	LOC115705509	XM_030632852	dolichyl-diphosphooligosaccharide--protein glycosyltransferase subunit STT3A	protein_coding	0.497248406	1	1	0.564230663	1	1
2.7678782855868596e-05-3	NC_044374.1	74828001	74828799	+	82.2849	798	Intergenic	Intergenic	-7639	LOC115716649	LOC115716649	XM_030645496	transaldolase	protein_coding	-0.297783348	1	1	0.187136637	1	1
2.7678782855868596e-05-5	NC_044375.1	73013801	73014599	+	82.2849	798	Intergenic	Intergenic	15070	LOC115721481	LOC115721481	XR_004012502	small nucleolar RNA R71	snoRNA	NA	NA	NA	NA	NA	NA
2.7678782855868596e-05-4	NC_044375.1	7365601	7366399	+	82.2849	798	Intergenic	Intergenic	-3714	LOC115719755	LOC115719755	XM_030648937	serine/threonine-protein kinase TOUSLED,	protein_coding	0.564257495	1	1	0.205951029	1	1
6.302537423658e-10	NC_044374.1	41159601	41161399	+	82.2849	1798	Intergenic	Intergenic	13987	LOC115716815	LOC115716815	XR_004011603	uncharacterized LOC115716815	lncRNA	NA	NA	NA	NA	NA	NA
1.8553181940666674e-06-3	NC_044377.1	57025401	57026599	+	82.2849	1198	exon	-exon (LOC115695292, exon 1 of 3)	268	LOC115695292	LOC115695292	XM_030622367	uncharacterized LOC115695292	protein_coding	NA	NA	NA	NA	NA	NA
1.8553181940666674e-06	NC_044375.1	30257801	30258599	+	82.2849	798	Intergenic	Intergenic	-20710	LOC115720015	LOC115720015	XM_030649183	#N/A	protein_coding	-0.330012176	1	1	-1.285650844	0.303665509	1
6.302537423658e-10-2	NC_044376.1	53335801	53336999	+	82.2849	1198	Intergenic	Intergenic	-540313	LOC115724262	LOC115724262	XR_004013061	small nucleolar RNA R71	snoRNA	NA	NA	NA	NA	NA	NA
1.8553181940666674e-06-2	NC_044376.1	58772001	58773199	+	82.2849	1198	Intergenic	Intergenic	-2666	LOC115723988	LOC115723988	XM_030653445	probable linoleate 9S-lipoxygenase 5	protein_coding	0.442388378	1	1	0.11396953	1	1
1.3187084438454283e-11	NC_044376.1	53151801	53153599	+	82.2423	1798	Intergenic	Intergenic	-385836	LOC115724380	LOC115724380	XR_004013173	small nucleolar RNA R71	snoRNA	NA	NA	NA	NA	NA	NA
1.8419450927965803e-10	NC_044374.1	77675201	77677199	+	82.2366	1998	Intergenic	Intergenic	-6944	LOC115718322	LOC115718322	XR_004011901	small nucleolar RNA R71	snoRNA	NA	NA	NA	NA	NA	NA
3.688583439103401e-08	NC_044375.1	12085401	12086999	+	82.2189	1598	Intergenic	Intergenic	14760	LOC115719603	LOC115719603	XM_030648701	sucrose transport protein SUC4	protein_coding	2.440026768	5.10166E-10	1.17168E-08	2.987648003	9.48961E-18	5.31699E-16
3.688583439103401e-08-2	NC_044378.1	40862201	40863599	+	82.2189	1398	Intergenic	Intergenic	21648	LOC115696567	LOC115696567	XM_030623461	probable aspartyl protease At4g16563	protein_coding	NA	NA	NA	NA	NA	NA
3.872115031040037e-12	NC_044370.1	74107001	74109599	+	82.2041	2598	Intergenic	Intergenic	159989	LOC115714390	LOC115714390	XM_030643079	uncharacterized LOC115714390	protein_coding	NA	NA	NA	NA	NA	NA
5.321463819278012e-07	NC_044379.1	1734001	1735599	+	82.2041	1598	Intergenic	Intergenic	-1054989	LOC115698919	LOC115698919	XM_030626122	extracellular ribonuclease LE	protein_coding	2.667802986	0.007814691	0.050323215	-3.483828726	2.07725E-15	9.57681E-14
7.836541349331879e-06-5	NC_044375.1	17972401	17973199	+	82.1809	798	Intergenic	Intergenic	38014	LOC115719932	LOC115719932	XM_030649103	uncharacterized LOC115719932	protein_coding	NA	NA	NA	NA	NA	NA
7.836541349331879e-06-3	NC_044372.1	2513201	2513999	+	82.1809	798	Intergenic	Intergenic	9175	LOC115708788	LOC115708788	XM_030636797	auxin-responsive protein SAUR71	protein_coding	2.7849318	1.78656E-11	4.87135E-10	1.654525004	0.008943459	0.075418437
7.836541349331879e-06-7	NC_044378.1	30560801	30561999	+	82.1809	1198	Intergenic	Intergenic	18307	LOC115697022	LOC115697022	XM_030623919	flavonol synthase/flavanone 3-hydroxylase-like	protein_coding	3.324028385	0.090546012	0.407245199	1.764946469	0.464570306	1
7.836541349331879e-06-4	NC_044372.1	24379401	24380199	+	82.1809	798	exon	-exon (LOC115710560, exon 2 of 3)	273	LOC115710560	LOC115710560	XM_030638921	stress response protein nst1-like	protein_coding	NA	NA	NA	NA	NA	NA
7.836541349331879e-06	NC_044370.1	60171601	60172399	+	82.1809	798	Intergenic	Intergenic	4741	LOC115722799	LOC115722799	XM_030652128	NADH-ubiquinone oxidoreductase chain 3	protein_coding	NA	NA	NA	NA	NA	NA
7.836541349331879e-06-2	NC_044371.1	49268001	49269399	+	82.1809	1398	Intergenic	Intergenic	-37121	LOC115704111	LOC115704111	XM_030631330	probable flavin-containing monooxygenase 1	protein_coding	-0.362706526	1	1	0.132243488	1	1
7.836541349331879e-06-6	NC_044377.1	73580401	73581599	+	82.1809	1198	Intergenic	Intergenic	29293	LOC115724663	LOC115724663	XM_030654003	myosin-15,	protein_coding	0.37438412	1	NA	-0.036563417	1	NA
1.0700848808239456e-08	NW_022060460.1	65801	67399	+	82.1634	1598	Intergenic	Intergenic	15739	LOC115702134	LOC115702134	XM_030629592	#N/A	protein_coding	2.708602144	0.174563641	0.694030375	0.11468676	1	1
2.2091961787198767e-10	NC_044371.1	4265401	4267199	+	82.1389	1798	Intergenic	Intergenic	20137	LOC115706723	LOC115706723	XM_030634444	40S ribosomal protein S20-2	protein_coding	0.425486257	1	1	0.847608452	1	1
0.00011923543987126533-7	NC_044377.1	57664601	57665399	+	82.1389	798	Intergenic	Intergenic	24961	LOC115695299	LOC115695299	XM_030622374	replication protein A 70 kDa DNA-binding subunit D	protein_coding	NA	NA	NA	NA	NA	NA
0.00011923543987126533-2	NC_044371.1	35096201	35096799	+	82.1389	598	Intergenic	Intergenic	-26541	LOC115706123	LOC115706123	XM_030633657	probable LRR receptor-like serine/threonine-protein kinase At4g29180	protein_coding	1.253373269	0.318861663	1	0.331608312	1	1
1.5328417061771203e-07	NC_044371.1	30104801	30105999	+	82.1389	1198	Intergenic	Intergenic	11472	LOC115707007	LOC115707007	XM_030634802	uncharacterized LOC115707007	protein_coding	NA	NA	NA	NA	NA	NA
0.00011923543987126533-6	NC_044376.1	37128401	37129199	+	82.1389	798	Intergenic	Intergenic	13777	LOC115723810	LOC115723810	XM_030653280	uncharacterized LOC115723810	protein_coding	NA	NA	NA	NA	NA	NA
0.00011923543987126533-8	NC_044377.1	64884001	64884599	+	82.1389	598	Intergenic	Intergenic	5508	LOC115695370	LOC115695370	XM_030622438	uncharacterized LOC115695370	protein_coding	1.023692668	0.993877769	NA	1.574535572	0.852389701	NA
0.00011923543987126533-3	NC_044373.1	60545201	60545999	+	82.1389	798	Intergenic	Intergenic	-15616	LOC115713550	LOC115713550	XM_030642034	uncharacterized LOC115713550	protein_coding	NA	NA	NA	NA	NA	NA
1.5328417061771203e-07-2	NC_044379.1	15279001	15280199	+	82.1389	1198	Intergenic	Intergenic	-34072	LOC115700615	LOC115700615	XM_030628222	peptidyl-prolyl cis-trans isomerase CYP23,	protein_coding	0.926169849	1	1	0.259137089	1	1
0.00011923543987126533-5	NC_044376.1	11285801	11286199	+	82.1389	398	Intergenic	Intergenic	-29031	LOC115724249	LOC115724249	XR_004013049	small nucleolar RNA R71	snoRNA	NA	NA	NA	NA	NA	NA
0.00011923543987126533-4	NC_044374.1	73831401	73832199	+	82.1389	798	Intergenic	Intergenic	5188	LOC115717986	LOC115717986	XM_030646956	14 kDa proline-rich protein DC2.15-like	protein_coding	NA	NA	NA	NA	NA	NA
0.00011923543987126533	NC_044370.1	5851201	5851999	+	82.1389	798	promoter-TSS	-promoter-TSS (LOC115703143)	-1173	LOC115703143	LOC115703143	XM_030630642	#N/A	protein_coding	0.063649394	1	1	0.100461478	1	1
6.465248052586812e-11-2	NC_044376.1	54276001	54277999	+	82.1019	1998	Intergenic	Intergenic	-46433	LOC115722911	LOC115722911	XM_030652281	probable fructokinase-6, chloroplastic,	protein_coding	-0.3689741	1	1	0.213041698	1	1
6.465248052586812e-11	NC_044371.1	20074601	20076799	+	82.1019	2198	Intergenic	Intergenic	43180	LOC115705441	LOC115705441	XM_030632777	CDP-diacylglycerol--glycerol-3-phosphate 3-phosphatidyltransferase 2	protein_coding	-0.904430982	1	1	0.150963129	1	1
2.2336682585151012e-06-2	NC_044378.1	27034801	27035599	+	82.1019	798	Intergenic	Intergenic	-22722	LOC115697710	LOC115697710	XM_030624808	squamosa promoter-binding-like protein 3	protein_coding	0.853223286	1	1	0.857528705	1	1
6.465248052586812e-11-3	NC_044377.1	48309201	48311199	+	82.1019	1998	Intergenic	Intergenic	-46928	LOC115695227	LOC115695227	XM_030622306	uncharacterized LOC115695227	protein_coding	0	1	NA	-0.998328082	1	NA
2.2336682585151012e-06-3	NC_044378.1	55342601	55343199	+	82.1019	598	Intergenic	Intergenic	25065	LOC115696654	LOC115696654	XM_030623545	14-3-3-like protein B	protein_coding	NA	NA	NA	NA	NA	NA
2.2336682585151012e-06-4	NW_022060487.1	700801	701799	+	82.1019	998	NA	NA	NA	NA			#N/A		NA	NA	NA	NA	NA	NA
2.2336682585151012e-06	NC_044372.1	12721401	12722799	+	82.1019	1398	Intergenic	Intergenic	-3967	LOC115709644	LOC115709644	XM_030637805	uncharacterized protein At5g50100, chloroplastic	protein_coding	-3.445289008	8.58559E-52	3.43835E-49	-1.492126599	0.00252799	0.024999861
4.431149280199246e-08	NC_044371.1	288001	289399	+	82.085	1398	promoter-TSS	-promoter-TSS (LOC115705473)	1514	LOC115708430	LOC115708430	XR_004009931	small nucleolar RNA R71	snoRNA	NA	NA	NA	NA	NA	NA
4.431149280199246e-08-2	NC_044377.1	44338801	44340199	+	82.085	1398	Intergenic	Intergenic	-37674	LOC115724935	LOC115724935	XM_030654312	uncharacterized LOC115724935,	protein_coding	0.647235119	1	1	0.67682145	1	1
9.07212160053363e-10	NC_044376.1	58110401	58112199	+	82.0753	1798	intron	-intron (LOC115723963, intron 2 of 2)	3462	LOC115723383	LOC115723383	XM_030652856	NADPH-dependent aldehyde reductase-like protein, chloroplastic	protein_coding	1.263029553	0.151107218	0.617765644	0.141377967	1	1
1.8512328559960764e-16	NC_044376.1	56213801	56216799	+	82.059	2998	Intergenic	Intergenic	-16127	LOC115721928	LOC115721928	XM_030651033	probable potassium transporter 17	protein_coding	0.353475897	1	1	1.483717686	0.196027461	1
2.6496101083081223e-10	NC_044377.1	45251801	45253999	+	82.0398	2198	Intergenic	Intergenic	56923	LOC115695213	LOC115695213	XM_030622295	uncharacterized LOC115695213	protein_coding	0	1	NA	-0.998328082	1	NA
6.401088821658072e-07	NC_044370.1	23479401	23480399	+	82.0398	998	Intergenic	Intergenic	-19310	LOC115718766	LOC115718766	XM_030647601	glutamate receptor 2.8-like	protein_coding	NA	NA	NA	NA	NA	NA
3.3407288599858205e-05-2	NC_044375.1	93497201	93497999	+	82.0398	798	Intergenic	Intergenic	23081	LOC115721270	LOC115721270	XM_030650534	helicase protein MOM1,	protein_coding	0.022766744	1	1	-0.1443083	1	1
6.401088821658072e-07-4	NW_022060487.1	464801	465599	+	82.0398	798	NA	NA	NA	NA			#N/A		NA	NA	NA	NA	NA	NA
6.401088821658072e-07-2	NC_044375.1	42174801	42175399	+	82.0398	598	Intergenic	Intergenic	-17233	LOC115720109	LOC115720109	XM_030649271	ankyrin repeat domain-containing protein, chloroplastic-like	protein_coding	-1.590213085	0.446982137	1	-0.732317366	1	1
3.3407288599858205e-05-4	NC_044377.1	66823201	66823799	+	82.0398	598	Intergenic	Intergenic	12473	LOC115725319	LOC115725319	XM_030654798	cationic peroxidase 2	protein_coding	0.21118972	1	1	-0.097336322	1	1
3.3407288599858205e-05-3	NC_044375.1	94672001	94672599	+	82.0398	598	Intergenic	Intergenic	14197	LOC115721220	LOC115721220	XM_030650477	ran-binding protein 1 homolog a-like	protein_coding	0.351287606	1	1	0.945543789	1	1
3.3407288599858205e-05	NC_044370.1	23559401	23560199	+	82.0398	798	Intergenic	Intergenic	-3718	LOC115718779	LOC115718779	XM_030647608	uncharacterized LOC115718779	protein_coding	NA	NA	NA	NA	NA	NA
6.401088821658072e-07-3	NC_044377.1	62744201	62744999	+	82.0398	798	Intergenic	Intergenic	30819	LOC115725473	LOC115725473	XM_030655009	eukaryotic translation initiation factor 2A,	protein_coding	-0.141999954	1	1	0.433160141	1	1
5.561420649543801e-12	NC_044376.1	29542801	29544999	+	82.0398	2198	Intergenic	Intergenic	-7535	LOC115723150	LOC115723150	XM_030652585	probable prefoldin subunit 5	protein_coding	-0.064301503	1	1	0.369637557	1	1
3.7353362739360556e-09	NC_044375.1	44217801	44219599	+	82.0013	1798	Intergenic	Intergenic	9459	LOC115718695	LOC115718695	XM_030647517	UDP-glycosyltransferase 87A1	protein_coding	-0.35258427	1	1	-1.829277752	0.089715545	0.532330303
1.8425066919137586e-07	NC_044377.1	31130201	31131399	+	81.9898	1198	Intergenic	Intergenic	-6797	LOC115695098	LOC115695098	XM_030622191	uncharacterized LOC115695098	protein_coding	NA	NA	NA	NA	NA	NA
9.44514295036245e-06	NC_044371.1	838201	839199	+	81.9682	998	Intergenic	Intergenic	11175	LOC115706349	LOC115706349	XM_030633969	uncharacterized LOC115706349	protein_coding	NA	NA	NA	NA	NA	NA
6.664817912618843e-12	NC_044377.1	33529801	33531999	+	81.9562	2198	Intergenic	Intergenic	-186129	LOC115695108	LOC115695108	XM_030622198	uncharacterized LOC115695108	protein_coding	NA	NA	NA	NA	NA	NA
1.58589519057644e-24	NC_044373.1	1032001	1036999	+	81.9419	4998	intron	-intron (LOC115712341, intron 2 of 9)	17072	LOC115712341	LOC115712341	XM_030640615	uncharacterized LOC115712341	protein_coding	-0.64505082	1	1	-0.100461255	1	1
1.2309679703048242e-14	NC_044370.1	20807401	20810599	+	81.9306	3198	Intergenic	Intergenic	9279	LOC115717940	LOC115717940	XM_030646909	uncharacterized LOC115717940	protein_coding	NA	NA	NA	NA	NA	NA
7.847002691836014e-17	NC_044375.1	10888401	10891599	+	81.9282	3198	TTS	-TTS (LOC115721386)	1522	LOC115721386	LOC115721386	XM_030650672	uncharacterized LOC115721386	protein_coding	NA	NA	NA	NA	NA	NA
2.6892158000669975e-06	NC_044378.1	36498201	36498999	+	81.9141	798	intron	-intron (LOC115696535, intron 2 of 2)	17331	LOC115696535	LOC115696535	XM_030623432	uncharacterized LOC115696535	protein_coding	NA	NA	NA	NA	NA	NA
9.29423877195661e-11	NC_044370.1	58274201	58275999	+	81.9141	1798	Intergenic	Intergenic	27566	LOC115712856	LOC115712856	XM_030641284	transcription factor bHLH74,	protein_coding	-0.629155947	1	1	0.120742114	1	1
0.00014419919021823767-2	NC_044376.1	21210401	21211199	+	81.8376	798	Intergenic	Intergenic	26032	LOC115722502	LOC115722502	XR_004012820	uncharacterized LOC115722502	lncRNA	-1.971311518	0.239728411	0.885870674	-1.891755941	0.268869594	1
0.00014419919021823767	NC_044372.1	73107401	73107999	+	81.8376	598	Intergenic	Intergenic	-19233	LOC115710912	LOC115710912	XM_030639264	uncharacterized LOC115710912	protein_coding	0	1	NA	-1.770848997	0.849029162	NA
0.00014419919021823767-3	NC_044377.1	40542201	40542799	+	81.8376	598	intron	-intron (LOC115695814, intron 5 of 12)	20265	LOC115695814	LOC115695814	XM_030622897	#N/A	protein_coding	-1.006607437	0.979615614	1	0.306767057	1	1
0.00014419919021823767-4	NC_044378.1	4654001	4654599	+	81.8376	598	Intergenic	Intergenic	-3370	LOC115698257	LOC115698257	XM_030625462	microsomal glutathione S-transferase 3	protein_coding	-0.853016199	1	1	-0.135777801	1	1
0.00014419919021823767-5	NC_044378.1	70449601	70449999	+	81.8376	398	Intergenic	Intergenic	52317	LOC115696814	LOC115696814	XM_030623697	uncharacterized LOC115696814	protein_coding	-0.875620617	1	1	-3.17942715	2.26566E-06	3.95534E-05
6.394590099941461e-08-2	NC_044377.1	27336801	27338199	+	81.8096	1398	Intergenic	Intergenic	22139	LOC115695072	LOC115695072	XM_030622166	uncharacterized LOC115695072	protein_coding	NA	NA	NA	NA	NA	NA
6.394590099941461e-08	NC_044375.1	93494401	93495999	+	81.8096	1598	Intergenic	Intergenic	25481	LOC115721270	LOC115721270	XM_030650534	helicase protein MOM1,	protein_coding	0.022766744	1	1	-0.1443083	1	1
4.032421635025234e-05-6	NC_044376.1	24661801	24662599	+	81.7862	798	Intergenic	Intergenic	-16154	LOC115724149	LOC115724149	XM_030653613	NDR1/HIN1-like protein 6	protein_coding	-1.785501878	0.600318817	1	-4.100118216	0.038161666	0.262520179
4.032421635025234e-05-2	NC_044370.1	44010201	44011199	+	81.7862	998	Intergenic	Intergenic	-10039	LOC115720739	LOC115720739	XM_030649914	uncharacterized LOC115720739	protein_coding	NA	NA	NA	NA	NA	NA
4.032421635025234e-05-9	NC_044377.1	41384201	41384999	+	81.7862	798	Intergenic	Intergenic	-70760	LOC115696056	LOC115696056	XR_004007654	small nucleolar RNA R71	snoRNA	NA	NA	NA	NA	NA	NA
4.032421635025234e-05	NC_044370.1	14805401	14806199	+	81.7862	798	Intergenic	Intergenic	-6593	LOC115703902	LOC115703902	XM_030631144	FCS-Like Zinc finger 8,	protein_coding	1.443105046	0.107157576	0.468369734	0.415274368	1	1
4.032421635025234e-05-7	NC_044376.1	39550001	39550799	+	81.7862	798	Intergenic	Intergenic	33425	LOC115723376	LOC115723376	XM_030652844	uncharacterized LOC115723376,	protein_coding	2.463667683	0.02161491	0.120610571	-2.785343825	7.09269E-05	0.000964685
4.032421635025234e-05-4	NC_044374.1	59534801	59535599	+	81.7862	798	Intergenic	Intergenic	3772	LOC115716857	LOC115716857	XR_004011616	uncharacterized LOC115716857	lncRNA	NA	NA	NA	NA	NA	NA
4.032421635025234e-05-3	NC_044373.1	81594801	81595599	+	81.7862	798	Intergenic	Intergenic	-5902	LOC115712530	LOC115712530	XM_030640820	patatin-like protein 1	protein_coding	0.374391473	1	NA	-0.919830608	1	NA
4.032421635025234e-05-8	NC_044377.1	39235801	39236599	+	81.7862	798	Intergenic	Intergenic	128084	LOC115724635	LOC115724635	XM_030653967	uncharacterized LOC115724635	protein_coding	-0.456086409	1	1	-0.306714958	1	1
4.032421635025234e-05-10	NW_022060348.1	235801	236599	+	81.7862	798	Intergenic	Intergenic	50070	LOC115702008	LOC115702008	XM_030629471	#N/A	protein_coding	NA	NA	NA	NA	NA	NA
4.032421635025234e-05-5	NC_044375.1	78915601	78916199	+	81.7862	598	Intergenic	Intergenic	-14134	LOC115718580	LOC115718580	XR_004011961	uncharacterized LOC115718580	lncRNA	-0.962230442	1	NA	1.110637219	0.971553946	NA
2.8106554676759032e-12	NC_044375.1	8585801	8588399	+	81.7726	2598	Intergenic	Intergenic	-42719	LOC115721272	LOC115721272	XM_030650537	probable receptor-like protein kinase At1g49730,	protein_coding	-0.016002124	1	1	-0.001369149	1	1
5.38019510001134e-09	NC_044370.1	61679801	61681199	+	81.7663	1398	Intergenic	Intergenic	120651	LOC115722901	LOC115722901	XM_030652267	nucleolar and coiled-body phosphoprotein 1-like	protein_coding	NA	NA	NA	NA	NA	NA
2.0081599901026213e-28	NC_044378.1	48372201	48379199	+	81.7492	6998	Intergenic	Intergenic	-49897	LOC115696615	LOC115696615	XM_030623510	uncharacterized LOC115696615	protein_coding	NA	NA	NA	NA	NA	NA
2.432109691608164e-13	NC_044373.1	39306601	39309199	+	81.7492	2598	Intergenic	Intergenic	26098	LOC115713405	LOC115713405	XM_030641889	vacuolar-processing enzyme alpha-isozyme-like	protein_coding	4.772401327	0.335707079	1	5.323242477	0.269917876	1
1.1384355111602531e-05	NC_044374.1	54270201	54271199	+	81.7492	998	Intergenic	Intergenic	-9725	LOC115717054	LOC115717054	XR_004011673	uncharacterized LOC115717054,	lncRNA	NA	NA	NA	NA	NA	NA
4.570491896905977e-10	NC_044377.1	77344001	77345799	+	81.7344	1798	Intergenic	Intergenic	9276	LOC115725282	LOC115725282	XM_030654740	activating signal cointegrator 1 complex subunit 2,	protein_coding	-0.193002761	1	1	-0.014436067	1	1
3.237719307486082e-06-3	NC_044375.1	11635801	11636799	+	81.7214	998	Intergenic	Intergenic	-10000	LOC115721229	LOC115721229	XM_030650486	non-specific lipid-transfer protein-like protein At2g13820	protein_coding	0.013386331	1	1	-5.073507876	1.13722E-09	3.0309E-08
3.237719307486082e-06-2	NC_044374.1	63299201	63300399	+	81.7214	1198	Intergenic	Intergenic	-23065	LOC115717896	LOC115717896	XM_030646866	uncharacterized LOC115717896	protein_coding	NA	NA	NA	NA	NA	NA
6.235065847601621e-15	NC_044378.1	59917801	59920599	+	81.7214	2798	Intergenic	Intergenic	11861	LOC115696896	LOC115696896	XM_030623783	O-fucosyltransferase 23-like	protein_coding	NA	NA	NA	NA	NA	NA
3.237719307486082e-06	NC_044373.1	26721201	26722199	+	81.7214	998	Intergenic	Intergenic	41430	LOC115713292	LOC115713292	XM_030641771	uncharacterized LOC115713292	protein_coding	NA	NA	NA	NA	NA	NA
1.4153800822387817e-91	NC_044376.1	61539001	61559799	+	81.6935	20798	Intergenic	Intergenic	-9977	LOC115724051	LOC115724051	XM_030653504	uncharacterized LOC115724051	protein_coding	NA	NA	NA	NA	NA	NA
2.662089755882027e-07	NC_044373.1	69012001	69013399	+	81.6823	1398	Intergenic	Intergenic	12052	LOC115712111	LOC115712111	XM_030640346	uncharacterized metal-dependent hydrolase YabD	protein_coding	-0.317803146	1	1	-0.139673936	1	1
2.662089755882027e-07-2	NC_044378.1	3152201	3153399	+	81.6823	1198	Intergenic	Intergenic	-4995	LOC115697113	LOC115697113	XM_030624020	pleiotropic drug resistance protein 1	protein_coding	2.564154651	4.84962E-08	8.50586E-07	3.557609266	1.57285E-18	9.4757E-17
7.68159917029978e-08	NC_044376.1	48961201	48962599	+	81.668	1398	Intergenic	Intergenic	-16244	LOC115722279	LOC115722279	XM_030651444	uncharacterized LOC115722279,	protein_coding	0.745848649	1	1	0.380553088	1	1
2.22392419375239e-08-3	NC_044375.1	36416601	36418199	+	81.656	1598	Intergenic	Intergenic	-15847	LOC115719230	LOC115719230	XM_030648188	alpha-crystallin domain-containing protein 22.3,	protein_coding	1.123413369	0.472941788	1	0.632544787	1	1
2.22392419375239e-08-2	NC_044372.1	14867001	14868399	+	81.656	1398	Intergenic	Intergenic	21607	LOC115708844	LOC115708844	XM_030636863	ribosomal RNA small subunit methyltransferase G	protein_coding	-0.309367469	1	1	-0.340038188	1	1
2.22392419375239e-08	NC_044371.1	47536601	47537799	+	81.656	1198	Intergenic	Intergenic	-73321	LOC115706904	LOC115706904	XM_030634674	L-ascorbate peroxidase 2, cytosolic-like	protein_coding	NA	NA	NA	NA	NA	NA
6.4568117874674675e-09	NC_044373.1	42801	44799	+	81.6459	1998	Intergenic	Intergenic	13980	LOC115714018	LOC115714018	XM_030642527	7-dehydrocholesterol reductase-like	protein_coding	0.424584863	1	1	0.493769659	1	1
1.8792269942837392e-09	NC_044370.1	20790001	20792399	+	81.6373	2398	Intergenic	Intergenic	-18499	LOC115705927	LOC115705927	XM_030633407	peptidyl-tRNA hydrolase 2, mitochondrial	protein_coding	-0.526016729	1	1	0.132628625	1	1
1.6016757638921738e-10	NC_044375.1	43334001	43336599	+	81.6232	2598	Intergenic	Intergenic	-459695	LOC115721317	LOC115721317	XM_030650591	tropomyosin-2-like	protein_coding	1.940454338	0.414144069	1	1.706036753	0.502563852	1
1.3722213996308223e-05-4	NC_044375.1	39209601	39210399	+	81.5236	798	Intergenic	Intergenic	-49760	LOC115719457	LOC115719457	XM_030648518	ABC transporter G family member 3	protein_coding	1.450857642	0.052481985	0.258549767	1.055258841	0.809545529	1
3.19980799183069e-07	NC_044372.1	66431001	66431999	+	81.5236	998	Intergenic	Intergenic	23877	LOC115709457	LOC115709457	XM_030637569	serine/arginine-rich splicing factor RS2Z33,	protein_coding	-0.420107425	1	1	-0.460773534	1	1
1.3722213996308223e-05-3	NC_044372.1	11913801	11914599	+	81.5236	798	promoter-TSS	-promoter-TSS (LOC115710433)	-517	LOC115710433	LOC115710433	XM_030638796	uncharacterized LOC115710433	protein_coding	NA	NA	NA	NA	NA	NA
4.867676050865298e-05-3	NC_044374.1	7629201	7629999	+	81.5236	798	Intergenic	Intergenic	4715	LOC115717308	LOC115717308	XM_030646278	acidic endochitinase-like	protein_coding	-1.489707251	0.331591484	1	-5.407820852	3.90824E-20	2.69326E-18
2.670084437831601e-08-3	NC_044378.1	48103601	48104999	+	81.5236	1398	Intergenic	Intergenic	-30406	LOC115696946	LOC115696946	XR_004007835	uncharacterized LOC115696946, 1	lncRNA	-0.436192891	1	1	0.189194205	1	1
1.3722213996308223e-05	NC_044370.1	38228401	38229199	+	81.5236	798	Intergenic	Intergenic	-18641	LOC115710594	LOC115710594	XM_030638955	#N/A	protein_coding	-1.123621975	0.724688754	1	-0.482413937	1	1
4.867676050865298e-05-5	NC_044375.1	85995001	85995999	+	81.5236	998	Intergenic	Intergenic	-13748	LOC115720451	LOC115720451	XM_030649599	uncharacterized LOC115720451	protein_coding	NA	NA	NA	NA	NA	NA
1.1141040764984592e-06-2	NC_044377.1	77074601	77076399	+	81.5236	1798	intron	-intron (LOC115725568, intron 7 of 7)	-7720	LOC115725569	LOC115725569	XM_030655138	protochlorophyllide-dependent translocon component 52, chloroplastic	protein_coding	2.114802736	0.107384944	0.469074232	-0.059983504	1	1
2.670084437831601e-08-2	NC_044377.1	45294401	45296199	+	81.5236	1798	Intergenic	Intergenic	-51443	LOC115695214	LOC115695214	XM_030622296	uncharacterized LOC115695214	protein_coding	0	1	NA	-0.998328082	1	NA
1.3722213996308223e-05-2	NC_044370.1	52435601	52436399	+	81.5236	798	Intergenic	Intergenic	-47914	LOC115702483	LOC115702483	XM_030629927	ethylene-responsive transcription factor ERF022-like	protein_coding	0	1	NA	-0.998328082	1	NA
4.867676050865298e-05-2	NC_044373.1	43188401	43189199	+	81.5236	798	Intergenic	Intergenic	-57193	LOC115713438	LOC115713438	XM_030641921	uncharacterized LOC115713438	protein_coding	0.374376113	1	NA	0.925217262	1	NA
3.898155187720879e-06-2	NC_044376.1	27252801	27253599	+	81.5236	798	Intergenic	Intergenic	-22701	LOC115722112	LOC115722112	XM_030651233	uncharacterized LOC115722112	protein_coding	0.436002461	1	1	0.001177034	1	1
4.867676050865298e-05-6	NW_022060482.1	68401	68999	+	81.5236	598	Intergenic	Intergenic	68530	LOC115702199	LOC115702199	XM_030629649	#N/A	protein_coding	NA	NA	NA	NA	NA	NA
0.0001744122366148443	NC_044375.1	51006001	51006599	+	81.5236	598	Intergenic	Intergenic	-5933	LOC115718651	LOC115718651	XM_030647473	transcription factor FER-LIKE IRON DEFICIENCY-INDUCED TRANSCRIPTION FACTOR	protein_coding	2.973989936	0.129472941	0.544829095	-0.233601172	1	1
3.898155187720879e-06	NC_044370.1	32551601	32552399	+	81.5236	798	Intergenic	Intergenic	38102	LOC115719828	LOC115719828	XM_030649016	ankyrin repeat-containing protein BDA1-like	protein_coding	NA	NA	NA	NA	NA	NA
3.19980799183069e-07-2	NC_044377.1	70504001	70505199	+	81.5236	1198	Intergenic	Intergenic	-6264	LOC115695440	LOC115695440	XM_030622506	uncharacterized LOC115695440	protein_coding	0	1	NA	-0.998328082	1	NA
1.1141040764984592e-06	NC_044372.1	11591001	11592199	+	81.5236	1198	Intergenic	Intergenic	34369	LOC115709937	LOC115709937	XM_030638202	28 kDa ribonucleoprotein, chloroplastic	protein_coding	-1.489776233	0.013290343	0.079588867	-0.196716219	1	1
4.867676050865298e-05-4	NC_044375.1	56379201	56379799	+	81.5236	598	Intergenic	Intergenic	-358224	LOC115720210	LOC115720210	XM_030649366	zinc finger BED domain-containing protein RICESLEEPER 2	protein_coding	1.21204423	0.891210279	1	0.424479101	1	1
0.0001744122366148443-2	NC_044378.1	25398001	25398599	+	81.5236	598	Intergenic	Intergenic	30335	LOC115696451	LOC115696451	XM_030623352	uncharacterized mitochondrial protein AtMg00810-like	protein_coding	NA	NA	NA	NA	NA	NA
4.867676050865298e-05-7	NW_022060497.1	33401	34199	+	81.5236	798	NA	NA	NA	NA			#N/A		NA	NA	NA	NA	NA	NA
2.670084437831601e-08	NC_044374.1	67937601	67938999	+	81.5236	1398	intron	-intron (LOC115717923, intron 1 of 1)	24613	LOC115717923	LOC115717923	XM_030646891	uncharacterized LOC115717923	protein_coding	0.374376113	1	NA	0.925217262	1	NA
9.227498266382652e-08	NC_044372.1	83643001	83644199	+	81.5236	1198	Intergenic	Intergenic	3053	LOC115708955	LOC115708955	XR_004010113	uncharacterized LOC115708955	lncRNA	NA	NA	NA	NA	NA	NA
1.4200454720088981e-12	NC_044377.1	27432401	27435399	+	81.5236	2998	Intergenic	Intergenic	-2787	LOC115725554	LOC115725554	XM_030655114	3-ketoacyl-CoA synthase 11	protein_coding	1.136211302	0.887467426	1	-8.650151688	1.33505E-56	6.55511E-54
4.867676050865298e-05	NC_044371.1	4262601	4263199	+	81.5236	598	Intergenic	Intergenic	-21196	LOC115703690	LOC115703690	XM_030630926	uncharacterized LOC115703690	protein_coding	NA	NA	NA	NA	NA	NA
4.340153305663099e-14	NW_022060417.1	2279401	2282599	+	81.4536	3198	Intergenic	Intergenic	26041	LOC115702065	LOC115702065	XM_030629515	#N/A	protein_coding	-0.8199085	1	1	0.113826937	1	1
1.4727605164344558e-13	NW_022060476.1	577801	580799	+	81.4504	2998	Intergenic	Intergenic	-152500	LOC115702188	LOC115702188	XM_030629636	#N/A	protein_coding	NA	NA	NA	NA	NA	NA
7.882154926306644e-10	NC_044378.1	23565001	23566599	+	81.416	1598	Intergenic	Intergenic	61072	LOC115696441	LOC115696441	XM_030623342	uncharacterized LOC115696441	protein_coding	NA	NA	NA	NA	NA	NA
2.7042791501881826e-09-3	NC_044375.1	28307401	28308599	+	81.4083	1198	Intergenic	Intergenic	12814	LOC115718548	LOC115718548	XM_030647348	disease resistance-like protein DSC1	protein_coding	-0.994034715	1	1	0.065780187	1	1
2.7042791501881826e-09	NC_044370.1	16038001	16039399	+	81.4083	1398	Intergenic	Intergenic	-3396	LOC115703453	LOC115703453	XR_004009215	small nucleolar RNA R71	snoRNA	NA	NA	NA	NA	NA	NA
2.7042791501881826e-09-2	NC_044374.1	53528801	53530999	+	81.4083	2198	Intergenic	Intergenic	14091	LOC115716921	LOC115716921	XR_004011631	uncharacterized LOC115716921	lncRNA	0.496049847	1	1	-0.126212194	1	1
9.298836428049867e-09	NC_044378.1	35116801	35118999	+	81.3993	2198	Intergenic	Intergenic	3941	LOC115698067	LOC115698067	XM_030625249	uncharacterized LOC115698067	protein_coding	0	1	1	-6.062980905	0.008986374	0.075715311
1.1084327533400985e-07-2	NC_044376.1	11087401	11088799	+	81.3765	1398	Intergenic	Intergenic	-2712	LOC115723560	LOC115723560	XM_030653050	uncharacterized LOC115723560	protein_coding	NA	NA	NA	NA	NA	NA
1.1084327533400985e-07-3	NC_044377.1	19911601	19912799	+	81.3765	1198	Intergenic	Intergenic	-11910	LOC115725512	LOC115725512	XM_030655062	uncharacterized LOC115725512	protein_coding	-1.760205476	0.000226699	0.002150951	-0.755195071	1	1
1.1084327533400985e-07	NC_044370.1	32753201	32754999	+	81.3765	1798	Intergenic	Intergenic	-7242	LOC115709986	LOC115709986	XM_030638281	kinesin-like protein KIN-1,	protein_coding	2.894315936	0.082976836	0.378785019	0.21256129	1	1
3.8461035323352774e-07	NC_044376.1	53258801	53259999	+	81.3616	1198	Intergenic	Intergenic	-492536	LOC115724380	LOC115724380	XR_004013173	small nucleolar RNA R71	snoRNA	NA	NA	NA	NA	NA	NA
1.3401395829097122e-06	NC_044371.1	11887001	11888399	+	81.3434	1398	Intergenic	Intergenic	-16890	LOC115706853	LOC115706853	XM_030634610	serine/threonine-protein kinase TOR-like	protein_coding	0.608897815	1	1	0.544028343	1	1
1.3401395829097122e-06-2	NC_044374.1	36253001	36254199	+	81.3434	1198	Intergenic	Intergenic	17888	LOC115716623	LOC115716623	XM_030645458	protein LURP-one-related 8	protein_coding	-1.157015193	0.408804474	1	-0.92827301	1	1
4.693374968025102e-06	NC_044376.1	21090001	21090799	+	81.3206	798	Intergenic	Intergenic	49454	LOC115723654	LOC115723654	XM_030653137	uncharacterized LOC115723654	protein_coding	NA	NA	NA	NA	NA	NA
4.693374968025102e-06-2	NC_044379.1	1747401	1748399	+	81.3206	998	Intergenic	Intergenic	-1041889	LOC115698919	LOC115698919	XM_030626122	extracellular ribonuclease LE	protein_coding	2.667802986	0.007814691	0.050323215	-3.483828726	2.07725E-15	9.57681E-14
9.451823801035199e-10	NC_044379.1	27828001	27829799	+	81.3068	1798	Intergenic	Intergenic	-7143	LOC115699218	LOC115699218	XM_030626513	uncharacterized LOC115699218	protein_coding	2.207229323	0.24180279	0.89113785	-0.944236705	1	1
1.6540774580486815e-05-2	NC_044374.1	77564001	77564799	+	81.2911	798	Intergenic	Intergenic	-14358	LOC115718006	LOC115718006	XM_030646974	uncharacterized LOC115718006	protein_coding	0	1	NA	-0.998328082	1	NA
1.6540774580486815e-05	NC_044370.1	2923201	2924199	+	81.2911	998	Intergenic	Intergenic	12254	LOC115703616	LOC115703616	XM_030630937	diphthine methyltransferase homolog,	protein_coding	0.33665896	1	1	0.080295546	1	1
5.876368006767647e-05	NC_044370.1	54410601	54411599	+	81.2517	998	exon	-exon (LOC115721744, exon 1 of 1)	528	LOC115721744	LOC115721744	XM_030650819	uncharacterized LOC115721744	protein_coding	NA	NA	NA	NA	NA	NA
3.848647521376608e-08-2	NC_044376.1	13359601	13361399	+	81.2517	1798	Intergenic	Intergenic	-13998	LOC115723058	LOC115723058	XM_030652464	aspartic proteinase-like protein 2,	protein_coding	0.214361851	1	1	-0.15243306	1	1
3.848647521376608e-08	NC_044375.1	82294201	82296399	+	81.2517	2198	Intergenic	Intergenic	-29743	LOC115721351	LOC115721351	XM_030650631	uncharacterized LOC115721351	protein_coding	0.951017509	1	1	0.190773848	1	1
1.3314578036482952e-07	NC_044373.1	27559201	27560199	+	81.2265	998	Intergenic	Intergenic	60871	LOC115715052	LOC115715052	XM_030643844	cytochrome P450 71A1	protein_coding	-1.424385749	0.019679147	0.110968683	0.064069942	1	1
1.3314578036482952e-07-2	NC_044374.1	46559801	46560999	+	81.2265	1198	Intergenic	Intergenic	23186	LOC115718178	LOC115718178	XM_030647139	uncharacterized protein At4g22758	protein_coding	-1.012128979	0.972732391	1	-1.897165832	0.010395143	0.085817826
0.00021098397465860814-4	NC_044378.1	42923601	42923999	+	81.1961	398	Intergenic	Intergenic	45364	LOC115697936	LOC115697936	XM_030625111	D-aminoacyl-tRNA deacylase	protein_coding	-0.204189787	1	1	0.270542593	1	1
0.00021098397465860814-3	NC_044378.1	24317601	24318199	+	81.1961	598	Intergenic	Intergenic	-45657	LOC115697951	LOC115697951	XM_030625130	uncharacterized LOC115697951	protein_coding	-1.549161225	0.892941345	NA	-0.998320075	1	NA
0.00021098397465860814	NC_044373.1	61801201	61801799	+	81.1961	598	Intergenic	Intergenic	-48637	LOC115713558	LOC115713558	XM_030642042	uncharacterized LOC115713558	protein_coding	NA	NA	NA	NA	NA	NA
4.622889262593732e-07	NC_044374.1	57965001	57965799	+	81.1961	798	Intergenic	Intergenic	-5044	LOC115717867	LOC115717867	XM_030646838	uncharacterized LOC115717867	protein_coding	NA	NA	NA	NA	NA	NA
4.622889262593732e-07-2	NC_044377.1	43820001	43821199	+	81.1961	1198	Intergenic	Intergenic	-283432	LOC115695668	LOC115695668	XM_030622727	uncharacterized protein At1g66480	protein_coding	3.167632037	5.83816E-07	8.59824E-06	3.239340754	1.76875E-07	3.63751E-06
0.00021098397465860814-2	NC_044377.1	28531001	28531599	+	81.1961	598	Intergenic	Intergenic	-20894	LOC115695075	LOC115695075	XM_030622169	uncharacterized LOC115695075	protein_coding	NA	NA	NA	NA	NA	NA
3.891154538682931e-09	NC_044377.1	71940601	71942199	+	81.1722	1598	Intergenic	Intergenic	37669	LOC115725224	LOC115725224	XM_030654668	auxin-responsive protein SAUR50	protein_coding	2.271012104	0.014904541	0.087822667	2.591700446	0.001943596	0.019975002
1.6120330594411612e-06-2	NC_044378.1	25733801	25734799	+	81.1589	998	Intergenic	Intergenic	52796	LOC115698019	LOC115698019	XM_030625201	probable LRR receptor-like serine/threonine-protein kinase RFK1,	protein_coding	1.151025286	0.334952632	1	1.033619408	0.827090473	1
1.6120330594411612e-06	NC_044372.1	15394801	15396199	+	81.1589	1398	Intergenic	Intergenic	-75334	LOC115710472	LOC115710472	XM_030638833	uncharacterized LOC115710472	protein_coding	0.059861929	1	NA	-1.107319735	0.957624322	1
1.1591064690600122e-10	NC_044373.1	34036201	34037999	+	81.1368	1798	Intergenic	Intergenic	26810	LOC115713352	LOC115713352	XM_030641831	uncharacterized LOC115713352	protein_coding	NA	NA	NA	NA	NA	NA
4.6204633252374533e-08-2	NC_044373.1	65900401	65902199	+	81.112	1798	Intergenic	Intergenic	-98899	LOC115715373	LOC115715373	XR_004011248	small nucleolar RNA R71	snoRNA	NA	NA	NA	NA	NA	NA
4.6204633252374533e-08	NC_044371.1	59310801	59312399	+	81.112	1598	exon	-exon (LOC115704177, exon 5 of 7)	1163	LOC115704177	LOC115704177	XM_030631392	uncharacterized LOC115704177	protein_coding	0.67951722	1	1	0.88710801	1	1
4.6204633252374533e-08-3	NC_044377.1	37538601	37539999	+	81.112	1398	Intergenic	Intergenic	-20866	LOC115725378	LOC115725378	XM_030654878	uncharacterized LOC115725378	protein_coding	0.111486524	1	1	-0.29029271	1	1
0.0007686224737487079	NC_044378.1	64628201	64628599	+	81.112	398	Intergenic	Intergenic	62750	LOC115697921	LOC115697921	XR_004008003	uncharacterized LOC115697921	lncRNA	NA	NA	NA	NA	NA	NA
0.0007686224737487079-2	NC_044379.1	15029801	15030199	+	81.112	398	Intergenic	Intergenic	-50764	LOC115699877	LOC115699877	XM_030627419	uncharacterized LOC115699877	protein_coding	NA	NA	NA	NA	NA	NA
0.0007686224737487079-3	NW_022060454.1	611601	611999	+	81.112	398	Intergenic	Intergenic	107642	LOC115702127	LOC115702127	XM_030629586	#N/A	protein_coding	-1.214863418	0.74862229	1	-0.136444746	1	1
5.650896697946453e-06	NC_044375.1	59477401	59478399	+	81.112	998	Intergenic	Intergenic	128621	LOC115720229	LOC115720229	XM_030649386	uncharacterized LOC115720229	protein_coding	NA	NA	NA	NA	NA	NA
3.96526416786702e-10	NC_044379.1	24419401	24421399	+	81.112	1998	Intergenic	Intergenic	55465	LOC115700639	LOC115700639	XM_030628251	transmembrane emp24 domain-containing protein p24delta9	protein_coding	0.670384183	1	1	-0.054575044	1	1
1.0667071878277401e-13	NC_044372.1	81630401	81633599	+	81.0936	3198	promoter-TSS	-promoter-TSS (LOC115711736)	-1094	LOC115711736	LOC115711736	XR_004010615	small nucleolar RNA R71	snoRNA	NA	NA	NA	NA	NA	NA
1.599328798829402e-07	NC_044372.1	49206401	49207799	+	81.0735	1398	Intergenic	Intergenic	33561	LOC115710742	LOC115710742	XM_030639096	uncharacterized LOC115710742	protein_coding	NA	NA	NA	NA	NA	NA
1.599328798829402e-07-2	NC_044372.1	73852601	73853799	+	81.0735	1198	Intergenic	Intergenic	-47884	LOC115708799	LOC115708799	XR_004010078	uncharacterized LOC115708799	lncRNA	-1.28120272	0.841692064	1	-4.483868833	0.00563731	0.050486438
1.599328798829402e-07-3	NC_044374.1	60108801	60109799	+	81.0735	998	Intergenic	Intergenic	-346855	LOC115717877	LOC115717877	XM_030646848	uncharacterized LOC115717877	protein_coding	NA	NA	NA	NA	NA	NA
1.9939002628459065e-05-2	NC_044376.1	664001	664999	+	81.0514	998	intron	-intron (LOC115722425, intron 1 of 2)	4661	LOC115722425	LOC115722425	XM_030651628	1-aminocyclopropane-1-carboxylate oxidase homolog 1	protein_coding	0.585728022	1	1	0.203651316	1	1
1.9939002628459065e-05-3	NC_044376.1	11861201	11862199	+	81.0514	998	Intergenic	Intergenic	-2146	LOC115723568	LOC115723568	XM_030653058	uncharacterized LOC115723568	protein_coding	NA	NA	NA	NA	NA	NA
1.9939002628459065e-05-4	NC_044377.1	73434801	73435999	+	81.0514	1198	Intergenic	Intergenic	-47479	LOC115725458	LOC115725458	XM_030654987	squalene synthase 2,	protein_coding	-0.62852234	1	1	0.249822376	1	1
1.9939002628459065e-05	NC_044370.1	35538201	35538999	+	81.0514	798	Intergenic	Intergenic	140377	LOC115710400	LOC115710400	XM_030638766	G-type lectin S-receptor-like serine/threonine-protein kinase LECRK1	protein_coding	1.143820885	0.971670632	NA	1.694662035	0.863807158	NA
4.667390237072018e-09	NC_044375.1	90135001	90136599	+	81.0514	1598	Intergenic	Intergenic	-9480	LOC115719421	LOC115719421	XM_030648466	uncharacterized protein DDB_G0271670	protein_coding	0.095232273	1	1	-0.363781246	1	1
3.762844895933736e-14	NC_044376.1	53393601	53396399	+	81.0412	2798	Intergenic	Intergenic	-481713	LOC115724262	LOC115724262	XR_004013061	small nucleolar RNA R71	snoRNA	NA	NA	NA	NA	NA	NA
1.3890188133675758e-10	NC_044374.1	70132201	70133199	+	81.0371	998	Intergenic	Intergenic	22542	LOC115718255	LOC115718255	XR_004011837	small nucleolar RNA R71	snoRNA	NA	NA	NA	NA	NA	NA
5.556497180717745e-07-2	NC_044375.1	33070401	33071399	+	81.027	998	Intergenic	Intergenic	-64155	LOC115720035	LOC115720035	XM_030649200	uncharacterized LOC115720035	protein_coding	NA	NA	NA	NA	NA	NA
5.556497180717745e-07	NC_044372.1	51384201	51385399	+	81.027	1198	Intergenic	Intergenic	93428	LOC115709149	LOC115709149	XM_030637183	UPF0481 protein At3g47200	protein_coding	0.374399795	1	NA	-1.919365176	0.81702512	NA
1.2767768349774234e-13	NC_044376.1	13622601	13625199	+	81.0196	2598	Intergenic	Intergenic	36559	LOC115724394	LOC115724394	XR_004013187	small nucleolar RNA R71	snoRNA	NA	NA	NA	NA	NA	NA
1.60681113169843e-08	NC_044371.1	94403801	94405199	+	81.0138	1398	Intergenic	Intergenic	-2228	LOC115704586	LOC115704586	XM_030631788	uncharacterized LOC115704586	protein_coding	NA	NA	NA	NA	NA	NA
4.753061598027318e-10	NW_022060368.1	230201	231799	+	81.0056	1598	Intergenic	Intergenic	15124	LOC115702022	LOC115702022	XM_030629482	#N/A	protein_coding	0.474538444	1	1	-0.253685084	1	1
7.094608831338384e-05	NC_044373.1	77559601	77560399	+	80.9698	798	Intergenic	Intergenic	-11539	LOC115714046	LOC115714046	XM_030642567	telomere repeat-binding factor 2,	protein_coding	0.745602716	1	1	0.131367052	1	1
1.939086356156881e-06-2	NC_044371.1	99219601	99220799	+	80.9698	1198	Intergenic	Intergenic	-12369	LOC115705268	LOC115705268	XM_030632551	uncharacterized LOC115705268	protein_coding	1.710155898	0.08098782	0.371203829	1.262862919	0.517158841	1
7.094608831338384e-05-4	NC_044379.1	4528201	4528999	+	80.9698	798	Intergenic	Intergenic	19122	LOC115698582	LOC115698582	XM_030625685	zinc finger CCCH domain-containing protein 48-like	protein_coding	0	1	NA	-0.998328082	1	NA
7.094608831338384e-05-6	NW_022060484.1	64401	65199	+	80.9698	798	TTS	-TTS (TRNAC-GCA_10)	156	TRNAC-GCA_10	TRNAC-GCA_10	TRNAC-GCA_10	#N/A	tRNA	NA	NA	NA	NA	NA	NA
1.939086356156881e-06-4	NC_044378.1	69448801	69449999	+	80.9698	1198	Intergenic	Intergenic	12450	LOC115696214	LOC115696214	XM_030623118	oxysterol-binding protein-related protein 2A	protein_coding	-1.566806793	0.159281425	0.643925726	-3.517793601	2.62575E-10	7.56367E-09
1.939086356156881e-06	NC_044371.1	67703401	67704799	+	80.9698	1398	Intergenic	Intergenic	9982	LOC115708126	LOC115708126	XM_030636325	transcription factor MYC2	protein_coding	2.646148641	0.006819152	0.044723495	-0.069494505	1	1
7.094608831338384e-05-2	NC_044374.1	54047201	54047799	+	80.9698	598	Intergenic	Intergenic	-174095	LOC115717850	LOC115717850	XM_030646820	NAC domain-containing protein 1-like	protein_coding	NA	NA	NA	NA	NA	NA
1.6294951295318987e-09-2	NC_044375.1	42364401	42365999	+	80.9698	1598	Intergenic	Intergenic	-12318	LOC115721059	LOC115721059	XR_004012368	uncharacterized LOC115721059	lncRNA	4.566864149	0.10494914	0.459972029	4.155914448	0.151423318	0.817344434
7.094608831338384e-05-5	NC_044379.1	9699401	9700199	+	80.9698	798	Intergenic	Intergenic	23217	LOC115701480	LOC115701480	XR_004008559	uncharacterized LOC115701480	lncRNA	NA	NA	NA	NA	NA	NA
1.939086356156881e-06-3	NC_044377.1	52595601	52596999	+	80.9698	1398	Intergenic	Intergenic	1502	LOC115696088	LOC115696088	XR_004007686	small nucleolar RNA R71	snoRNA	NA	NA	NA	NA	NA	NA
1.939086356156881e-06-5	NW_022060454.1	574001	574999	+	80.9698	998	Intergenic	Intergenic	70342	LOC115702127	LOC115702127	XM_030629586	#N/A	protein_coding	-1.214863418	0.74862229	1	-0.136444746	1	1
7.094608831338384e-05-3	NC_044375.1	41475801	41476599	+	80.9698	798	Intergenic	Intergenic	-15505	LOC115720608	LOC115720608	XM_030649763	proteasome adapter and scaffold protein ECM29	protein_coding	-0.343726723	1	1	-0.120831327	1	1
1.6294951295318987e-09	NC_044370.1	26860401	26863399	+	80.9698	2998	intron	-intron (LOC115708359, intron 3 of 3)	17312	LOC115708309	LOC115708309	XM_030636543	cytosolic sulfotransferase 15,	protein_coding	2.787045096	0.095695652	0.427207971	0.462670289	1	1
5.546933323177365e-08	NC_044373.1	19876801	19878199	+	80.9698	1398	Intergenic	Intergenic	-31611	LOC115715363	LOC115715363	XR_004011239	small nucleolar RNA R71	snoRNA	NA	NA	NA	NA	NA	NA
5.598315543019135e-09-2	NC_044379.1	33816001	33817199	+	80.9287	1198	Intergenic	Intergenic	-8145	LOC115700880	LOC115700880	XM_030628545	50S ribosomal protein L19, chloroplastic,	protein_coding	-0.091409419	1	1	0.416104417	1	1
5.598315543019135e-09	NC_044376.1	47104401	47105999	+	80.9287	1598	intron	-intron (LOC115724200, intron 16 of 21)	24079	LOC115724200	LOC115724200	XM_030653685	phospholipase SGR2,	protein_coding	-0.346969132	1	1	-0.570329398	1	1
1.9210558761874894e-07-2	NC_044370.1	64914601	64915799	+	80.9175	1198	Intergenic	Intergenic	-12659	LOC115702545	LOC115702545	XR_004008915	uncharacterized LOC115702545	lncRNA	NA	NA	NA	NA	NA	NA
1.9210558761874894e-07	NC_044370.1	6866201	6867599	+	80.9175	1398	Intergenic	Intergenic	-11388	LOC115703198	LOC115703198	XM_030630716	pentatricopeptide repeat-containing protein At2g15630, mitochondrial	protein_coding	-0.362601838	1	1	-0.090230544	1	1
5.190884177450716e-13	NC_044371.1	42981801	42984399	+	80.9175	2598	Intergenic	Intergenic	18304	LOC115708374	LOC115708374	XR_004009874	small nucleolar RNA R71	snoRNA	NA	NA	NA	NA	NA	NA
1.9210558761874894e-07-3	NC_044375.1	43238201	43239599	+	80.9175	1398	Intergenic	Intergenic	-556095	LOC115721317	LOC115721317	XM_030650591	tropomyosin-2-like	protein_coding	1.940454338	0.414144069	1	1.706036753	0.502563852	1
6.803857936941888e-06	NC_044375.1	33582801	33583599	+	80.8977	798	Intergenic	Intergenic	-36991	LOC115719735	LOC115719735	XM_030648910	probable UDP-N-acetylglucosamine--peptide N-acetylglucosaminyltransferase SEC,	protein_coding	-0.061275803	1	1	-0.358410072	1	1
1.7323033978629235e-16	NC_044379.1	1597801	1599999	+	80.8902	2198	Intergenic	Intergenic	-1186097	LOC115698860	LOC115698860	XM_030626068	amino acid transporter AVT1I	protein_coding	-1.967867848	0.196163411	0.757198644	1.423663466	0.584848218	1
1.7323033978629235e-16-2	NC_044379.1	1600801	1602399	+	80.8902	1598	Intergenic	Intergenic	-1188189	LOC115698919	LOC115698919	XM_030626122	extracellular ribonuclease LE	protein_coding	2.667802986	0.007814691	0.050323215	-3.483828726	2.07725E-15	9.57681E-14
1.928061574501214e-08	NC_044373.1	41022601	41023799	+	80.881	1198	intron	-intron (LOC115713420, intron 1 of 2)	9344	LOC115713008	LOC115713008	XM_030641471	sulfhydryl oxidase 2,	protein_coding	0.43383279	1	1	0.380582312	1	1
0.00025525964922240926	NC_044372.1	39102801	39103399	+	80.8542	598	Intergenic	Intergenic	79004	LOC115708652	LOC115708652	XM_030636632	uncharacterized LOC115708652	protein_coding	2.335330951	0.014011883	0.083441891	-0.245316544	1	1
6.678568643498305e-07	NC_044373.1	44815801	44817399	+	80.8542	1598	Intergenic	Intergenic	27848	LOC115713445	LOC115713445	XM_030641929	uncharacterized LOC115713445	protein_coding	NA	NA	NA	NA	NA	NA
0.00025525964922240926-3	NC_044374.1	2205201	2205599	+	80.8542	398	Intergenic	Intergenic	-3147	LOC115716583	LOC115716583	XM_030645412	uncharacterized LOC115716583	protein_coding	4.342842375	0.060609652	0.291785459	-0.594362877	1	1
0.00025525964922240926-5	NC_044378.1	52325801	52326399	+	80.8542	598	Intergenic	Intergenic	-77711	LOC115696646	LOC115696646	XM_030623537	uncharacterized LOC115696646	protein_coding	NA	NA	NA	NA	NA	NA
0.00025525964922240926-4	NC_044375.1	35704601	35705199	+	80.8542	598	Intergenic	Intergenic	25574	LOC115720052	LOC115720052	XM_030649216	uncharacterized LOC115720052	protein_coding	NA	NA	NA	NA	NA	NA
6.678568643498305e-07-2	NC_044374.1	42842801	42843799	+	80.8542	998	Intergenic	Intergenic	18761	LOC115717770	LOC115717770	XM_030646745	uncharacterized LOC115717770	protein_coding	NA	NA	NA	NA	NA	NA
0.00025525964922240926-6	NW_022060361.1	8401	8999	+	80.8542	598	NA	NA	NA	NA			#N/A		NA	NA	NA	NA	NA	NA
0.00025525964922240926-2	NC_044372.1	61198201	61198799	+	80.8542	598	Intergenic	Intergenic	-16972	LOC115708856	LOC115708856	XR_004010085	uncharacterized LOC115708856	lncRNA	NA	NA	NA	NA	NA	NA
6.008731254788238e-12	NC_044374.1	54478801	54481799	+	80.8542	2998	intron	-intron (LOC115717852, intron 1 of 2)	1477	LOC115717852	LOC115717852	XM_030646822	uncharacterized LOC115717852	protein_coding	NA	NA	NA	NA	NA	NA
0.00025525964922240926-7	NW_022060476.1	159801	160199	+	80.8542	398	Intergenic	Intergenic	-571800	LOC115702188	LOC115702188	XM_030629636	#N/A	protein_coding	NA	NA	NA	NA	NA	NA
2.0480959405127028e-11	NC_044370.1	70492201	70494199	+	80.8173	1998	exon	-exon (LOC115723794, exon 2 of 3)	654	LOC115723794	LOC115723794	XM_030653266	uncharacterized LOC115723794	protein_coding	0	1	NA	-0.998328082	1	NA
2.403626384510163e-05-2	NC_044377.1	7217201	7217999	+	80.8041	798	Intergenic	Intergenic	26614	LOC115725054	LOC115725054	XM_030654467	probable WRKY transcription factor 32	protein_coding	0.35957861	1	1	0.974403068	1	1
2.403626384510163e-05	NC_044374.1	72756401	72757199	+	80.8041	798	Intergenic	Intergenic	-15771	LOC115716132	LOC115716132	XM_030644865	2,3-dimethylmalate lyase,	protein_coding	0.15731921	1	1	0.080929313	1	1
6.7147196667478754e-09	NC_044377.1	51477001	51478999	+	80.8041	1998	Intergenic	Intergenic	-81190	LOC115725679	LOC115725679	XM_030655263	putative inactive cadmium/zinc-transporting ATPase HMA3	protein_coding	1.628413593	0.873301313	NA	3.141043546	0.586914813	NA
2.403626384510163e-05-3	NW_022060512.1	16401	16999	+	80.8041	598	NA	NA	NA	NA			#N/A		NA	NA	NA	NA	NA	NA
2.3324873156301785e-06-2	NC_044372.1	90150801	90151799	+	80.7761	998	promoter-TSS	-promoter-TSS (LOC115711867)	-482	LOC115711867	LOC115711867	XR_004010734	small nucleolar RNA R71	snoRNA	NA	NA	NA	NA	NA	NA
2.3324873156301785e-06-3	NC_044377.1	42615401	42616799	+	80.7761	1398	Intergenic	Intergenic	-101363	LOC115694858	LOC115694858	XR_004007497	uncharacterized LOC115694858	lncRNA	NA	NA	NA	NA	NA	NA
2.3324873156301785e-06	NC_044371.1	49271001	49271999	+	80.7761	998	Intergenic	Intergenic	-34321	LOC115704111	LOC115704111	XM_030631330	probable flavin-containing monooxygenase 1	protein_coding	-0.362706526	1	1	0.132243488	1	1
2.3074574577804724e-07	NC_044377.1	19435801	19436799	+	80.7583	998	Intergenic	Intergenic	158495	LOC115695998	LOC115695998	XR_004007602	small nucleolar RNA R71	snoRNA	NA	NA	NA	NA	NA	NA
2.313475878731136e-08-2	NC_044376.1	29575201	29576599	+	80.7459	1398	Intergenic	Intergenic	-16793	TRNAT-UGU_4	TRNAT-UGU_4	TRNAT-UGU_4	#N/A	tRNA	NA	NA	NA	NA	NA	NA
2.313475878731136e-08	NC_044374.1	72215601	72216999	+	80.7459	1398	Intergenic	Intergenic	-226966	LOC115717117	LOC115717117	XM_030646063	SPX domain-containing membrane protein At4g22990,	protein_coding	-1.48290583	0.0882296	0.398973794	0.257529488	1	1
3.536114369643512e-23	NW_022060359.1	221201	225799	+	80.7396	4598	NA	NA	NA	NA			#N/A		NA	NA	NA	NA	NA	NA
2.3424979986046252e-09	NC_044375.1	61695201	61697399	+	80.7368	2198	Intergenic	Intergenic	-56799	LOC115719711	LOC115719711	XM_030648859	protein TRAUCO	protein_coding	-0.047375395	1	1	0.200426737	1	1
2.389901016579598e-10	NC_044376.1	44113401	44115999	+	80.7298	2598	Intergenic	Intergenic	32390	LOC115722339	LOC115722339	XR_004012813	uncharacterized LOC115722339	lncRNA	NA	NA	NA	NA	NA	NA
2.6197504005435047e-13	NC_044375.1	55727401	55730999	+	80.7162	3598	Intergenic	Intergenic	-12348	LOC115720899	LOC115720899	XM_030650103	hydroxyproline O-arabinosyltransferase 3	protein_coding	-0.121805545	1	1	-0.229214647	1	1
3.419098494985533e-19	NC_044374.1	15051601	15055399	+	80.703	3798	Intergenic	Intergenic	41351	LOC115715816	LOC115715816	XM_030644487	serine carboxypeptidase-like 45	protein_coding	1.366627001	0.90774315	NA	-1.018762619	0.995041532	NA
8.192163294115526e-06-3	NC_044376.1	22073001	22074399	+	80.6775	1398	Intergenic	Intergenic	-72732	LOC115724255	LOC115724255	XR_004013055	small nucleolar RNA R71	snoRNA	NA	NA	NA	NA	NA	NA
8.566050762728129e-05-2	NC_044371.1	41476201	41476799	+	80.6775	598	Intergenic	Intergenic	12107	LOC115704041	LOC115704041	XM_030631264	uncharacterized LOC115704041	protein_coding	NA	NA	NA	NA	NA	NA
8.566050762728129e-05-6	NC_044377.1	45791601	45792199	+	80.6775	598	Intergenic	Intergenic	45935	LOC115694771	LOC115694771	XM_030621857	plasma membrane ATPase 4	protein_coding	0.831329044	1	1	1.310704756	0.35077982	1
8.566050762728129e-05-4	NC_044375.1	5938601	5939399	+	80.6775	798	Intergenic	Intergenic	-15037	LOC115719807	LOC115719807	XM_030648997	F-box/LRR-repeat protein At3g26922-like	protein_coding	NA	NA	NA	NA	NA	NA
8.566050762728129e-05-7	NC_044379.1	46177401	46178199	+	80.6775	798	intron	-intron (LOC115700166, intron 3 of 3)	5230	LOC115700166	LOC115700166	XM_030627728	putative leucine-rich repeat receptor-like protein kinase At2g19210	protein_coding	NA	NA	NA	NA	NA	NA
8.192163294115526e-06-5	NC_044379.1	6038401	6039199	+	80.6775	798	Intergenic	Intergenic	9741	LOC115699239	LOC115699239	XM_030626534	uncharacterized LOC115699239	protein_coding	NA	NA	NA	NA	NA	NA
8.566050762728129e-05	NC_044370.1	66284001	66284599	+	80.6775	598	Intergenic	Intergenic	-20288	LOC115713490	LOC115713490	XM_030641975	uncharacterized LOC115713490	protein_coding	2.40612233	0.023008751	0.127243158	1.329214708	0.57006501	1
7.993854150542191e-08-3	NW_022060353.1	7201	9199	+	80.6775	1998	NA	NA	NA	NA			#N/A		NA	NA	NA	NA	NA	NA
8.027123689326567e-07-2	NC_044375.1	45122001	45124199	+	80.6775	2198	Intergenic	Intergenic	17474	LOC115721173	LOC115721173	XM_030650426	NADPH-dependent aldehyde reductase 1, chloroplastic-like	protein_coding	0	1	1	-7.794300258	6.3466E-05	0.000870983
8.566050762728129e-05-3	NC_044373.1	55236001	55236799	+	80.6775	798	Intergenic	Intergenic	-57925	LOC115714259	LOC115714259	XM_030642889	glycosyltransferase family 92 protein RCOM_0530710	protein_coding	-0.207471388	1	1	-0.215425567	1	1
7.993854150542191e-08	NC_044371.1	29859601	29861199	+	80.6775	1598	Intergenic	Intergenic	17010	LOC115705204	LOC115705204	XR_004009415	uncharacterized LOC115705204	lncRNA	NA	NA	NA	NA	NA	NA
8.192163294115526e-06-2	NC_044373.1	23343601	23344399	+	80.6775	798	Intergenic	Intergenic	-10830	LOC115713257	LOC115713257	XM_030641740	uncharacterized LOC115713257	protein_coding	NA	NA	NA	NA	NA	NA
7.993854150542191e-08-2	NC_044377.1	19432801	19434799	+	80.6775	1998	Intergenic	Intergenic	160995	LOC115695998	LOC115695998	XR_004007602	small nucleolar RNA R71	snoRNA	NA	NA	NA	NA	NA	NA
8.192163294115526e-06	NC_044371.1	23736801	23737599	+	80.6775	798	Intergenic	Intergenic	-19048	LOC115704826	LOC115704826	XM_030632032	uncharacterized LOC115704826	protein_coding	3.075275827	0.005036511	0.034126486	1.78764737	0.229696209	1
8.566050762728129e-05-5	NC_044377.1	43568001	43568599	+	80.6775	598	Intergenic	Intergenic	-508081	LOC115695201	LOC115695201	XM_030622286	uncharacterized LOC115695201	protein_coding	NA	NA	NA	NA	NA	NA
8.566050762728129e-05-8	NW_022060480.1	74801	75399	+	80.6775	598	Intergenic	Intergenic	40101	LOC115702194	LOC115702194	XM_030629643	#N/A	protein_coding	1.721904239	0.001203254	0.009693021	1.946781814	1.65742E-05	0.000251365
8.192163294115526e-06-4	NC_044378.1	52403601	52404599	+	80.6775	998	exon	-exon (LOC115696646, exon 1 of 2)	289	LOC115696646	LOC115696646	XM_030623537	uncharacterized LOC115696646	protein_coding	NA	NA	NA	NA	NA	NA
8.027123689326567e-07	NC_044371.1	54586201	54587399	+	80.6775	1198	Intergenic	Intergenic	-324673	LOC115704145	LOC115704145	XM_030631362	uncharacterized LOC115704145	protein_coding	NA	NA	NA	NA	NA	NA
8.374347383158054e-11	NC_044374.1	67934401	67936599	+	80.6775	2198	intron	-intron (LOC115717923, intron 1 of 1)	21813	LOC115717923	LOC115717923	XM_030646891	uncharacterized LOC115717923	protein_coding	0.374376113	1	NA	0.925217262	1	NA
8.053511172705705e-09	NW_022060465.1	831401	833399	+	80.6775	1998	Intergenic	Intergenic	10706	LOC115702157	LOC115702157	XM_030629613	#N/A	protein_coding	0.374812897	1	1	1.058527754	0.867657683	1
4.5306735473639445e-21	NW_022060485.1	15401	18199	+	80.6545	2798	Intergenic	Intergenic	-59683	LOC115702201	LOC115702201	XM_030629650	#N/A	protein_coding	NA	NA	NA	NA	NA	NA
3.3928059968683748e-15	NC_044372.1	59113801	59117199	+	80.6443	3398	Intergenic	Intergenic	24631	LOC115710813	LOC115710813	XM_030639164	uncharacterized LOC115710813	protein_coding	NA	NA	NA	NA	NA	NA
2.863575203509604e-10	NC_044378.1	22198801	22200799	+	80.6248	1998	Intergenic	Intergenic	35974	LOC115696217	LOC115696217	XM_030623120	leucine-rich repeat protein 1	protein_coding	0.768025782	1	1	0.393263703	1	1
2.7715226472814713e-07	NC_044370.1	19419801	19420999	+	80.5958	1198	Intergenic	Intergenic	-2207	LOC115705600	LOC115705600	XM_030632978	ferrochelatase-2, chloroplastic	protein_coding	0.657818102	1	1	0.162261313	1	1
2.7715226472814713e-07-3	NW_022060469.1	10201	11399	+	80.5958	1198	NA	NA	NA	NA			#N/A		NA	NA	NA	NA	NA	NA
2.7715226472814713e-07-2	NC_044371.1	11437201	11437999	+	80.5958	798	Intergenic	Intergenic	-2585	LOC115705690	LOC115705690	XM_030633091	probable methyltransferase PMT11	protein_coding	0.529991261	1	1	0.407797337	1	1
2.805691879574124e-06	NC_044370.1	30850201	30851599	+	80.5776	1398	Intergenic	Intergenic	-7955	LOC115709758	LOC115709758	XM_030637962	uncharacterized LOC115709758,	protein_coding	-0.502534983	1	1	-0.326067847	1	1
2.805691879574124e-06-2	NC_044372.1	31941201	31942599	+	80.5776	1398	Intergenic	Intergenic	86752	LOC115710619	LOC115710619	XM_030638976	uncharacterized LOC115710619	protein_coding	NA	NA	NA	NA	NA	NA
2.805691879574124e-06-3	NC_044375.1	36202601	36203599	+	80.5776	998	Intergenic	Intergenic	-53619	LOC115720694	LOC115720694	XM_030649859	uncharacterized LOC115720694	protein_coding	0.844170127	1	1	-0.275691173	1	1
2.8976533589819714e-05-2	NC_044374.1	5614001	5614599	+	80.5488	598	Intergenic	Intergenic	21252	LOC115717104	LOC115717104	XM_030646047	(S)-coclaurine N-methyltransferase	protein_coding	-0.470594437	1	1	-0.113852084	1	1
2.8976533589819714e-05-3	NC_044374.1	68483201	68483999	+	80.5488	798	Intergenic	Intergenic	9992	LOC115716131	LOC115716131	XM_030644862	nuclear transcription factor Y subunit C-3-like	protein_coding	0	1	NA	-2.881130672	0.635916083	NA
2.8976533589819714e-05-4	NC_044378.1	69841001	69841799	+	80.5488	798	Intergenic	Intergenic	-8972	LOC115698195	LOC115698195	XM_030625382	putative disease resistance protein RGA3	protein_coding	-1.650674888	0.076793759	0.355455438	-0.522527303	1	1
2.8976533589819714e-05-5	NW_022060329.1	339201	339999	+	80.5488	798	Intergenic	Intergenic	-53110	LOC115701980	LOC115701980	XM_030629443	#N/A	protein_coding	1.005838193	0.990240423	1	0.296705443	1	1
2.8976533589819714e-05	NC_044372.1	30208801	30209599	+	80.5488	798	Intergenic	Intergenic	10057	LOC115708735	LOC115708735	XM_030636738	homeobox protein knotted-1-like 6	protein_coding	8.749053413	2.06715E-10	4.94854E-09	6.227004023	7.44625E-20	4.9743E-18
9.596021441149806e-08-2	NC_044375.1	43695001	43696599	+	80.5272	1598	Intergenic	Intergenic	-99195	LOC115721317	LOC115721317	XM_030650591	tropomyosin-2-like	protein_coding	1.940454338	0.414144069	1	1.706036753	0.502563852	1
9.596021441149806e-08-4	NC_044377.1	59073801	59074399	+	80.5272	598	intron	-intron (LOC115695307, intron 1 of 2)	38037	LOC115696095	LOC115696095	XR_004007693	small nucleolar RNA R71	snoRNA	NA	NA	NA	NA	NA	NA
9.596021441149806e-08	NC_044375.1	28101401	28102599	+	80.5272	1198	Intergenic	Intergenic	-16719	LOC115719998	LOC115719998	XM_030649167	uncharacterized LOC115719998	protein_coding	0.374376113	1	NA	0.925217262	1	NA
9.596021441149806e-08-3	NC_044375.1	94762801	94763999	+	80.5272	1198	Intergenic	Intergenic	-5973	LOC115720543	LOC115720543	XM_030649687	spermidine coumaroyl-CoA acyltransferase-like	protein_coding	0.988269713	1	1	-3.090989449	0.063014792	0.397051816
3.3670506532725065e-09	NC_044379.1	32900401	32902599	+	80.4968	2198	Intergenic	Intergenic	-18669	LOC115698975	LOC115698975	XM_030626189	PLASMODESMATA CALLOSE-BINDING PROTEIN 4,	protein_coding	0.07548299	1	1	0.404825787	1	1
0.00030887084185613427	NC_044374.1	83311801	83312399	+	80.4968	598	Intergenic	Intergenic	-6777	LOC115716962	LOC115716962	XM_030645890	zinc finger CCCH domain-containing protein 12-like	protein_coding	-0.775001734	1	1	-0.473612504	1	1
9.647845386206357e-07-2	NC_044379.1	12960801	12962199	+	80.4968	1398	intron	-intron (LOC115701142, intron 9 of 12)	2365	LOC115701142	LOC115701142	XM_030628848	lipid droplet-associated hydrolase	protein_coding	0.051535975	1	1	-0.289064198	1	1
0.00030887084185613427-2	NC_044378.1	35683401	35683999	+	80.4968	598	Intergenic	Intergenic	-127686	LOC115696529	LOC115696529	XM_030623427	uncharacterized LOC115696529	protein_coding	NA	NA	NA	NA	NA	NA
4.6611414088631445e-14	NC_044374.1	24261601	24264399	+	80.4968	2798	Intergenic	Intergenic	3716	LOC115718251	LOC115718251	XR_004011832	small nucleolar RNA R71	snoRNA	NA	NA	NA	NA	NA	NA
9.647845386206357e-07	NC_044377.1	51686001	51686999	+	80.4968	998	Intergenic	Intergenic	47444	LOC115695696	LOC115695696	XR_004007530	uncharacterized LOC115695696,	lncRNA	0.374376113	1	NA	0.925217262	1	NA
1.235071260066426e-11	NC_044372.1	34690201	34692799	+	80.4968	2598	Intergenic	Intergenic	17110	LOC115708691	LOC115708691	XR_004010062	uncharacterized LOC115708691,	lncRNA	0.060719908	1	1	1.186069133	0.530234162	1
9.86386620157712e-06-5	NC_044375.1	34876801	34877599	+	80.451	798	Intergenic	Intergenic	43010	LOC115721529	LOC115721529	XR_004012545	U4 spliceosomal RNA	snRNA	-0.618791624	1	1	-0.004713629	1	1
9.86386620157712e-06-2	NC_044373.1	1519401	1520199	+	80.451	798	Intergenic	Intergenic	5105	LOC115712418	LOC115712418	XM_030640692	uncharacterized LOC115712418	protein_coding	NA	NA	NA	NA	NA	NA
9.86386620157712e-06-3	NC_044374.1	46503201	46504199	+	80.451	998	Intergenic	Intergenic	-3886	LOC115717796	LOC115717796	XM_030646770	glycine-rich cell wall structural protein-like	protein_coding	NA	NA	NA	NA	NA	NA
9.86386620157712e-06-4	NC_044374.1	83985801	83986799	+	80.451	998	Intergenic	Intergenic	-18709	LOC115718104	LOC115718104	XM_030647065	protein LURP-one-related 17	protein_coding	2.863454616	0.325573651	NA	0.223085478	1	1
9.86386620157712e-06	NC_044371.1	55136601	55137399	+	80.451	798	Intergenic	Intergenic	214135	LOC115707541	LOC115707541	XM_030635546	tRNA:m(4)X modification enzyme TRM13,	protein_coding	0.007503496	1	1	0.385378342	1	1
9.86386620157712e-06-6	NC_044376.1	24932601	24933599	+	80.451	998	Intergenic	Intergenic	29299	LOC115722692	LOC115722692	XM_030651966	biotin synthase, mitochondrial	protein_coding	1.120042981	0.766619699	1	0.370984604	1	1
4.212998248629075e-11	NC_044374.1	77662601	77664599	+	80.4389	1998	Intergenic	Intergenic	5656	LOC115718322	LOC115718322	XR_004011901	small nucleolar RNA R71	snoRNA	NA	NA	NA	NA	NA	NA
3.328846119451748e-07	NC_044372.1	4940001	4941199	+	80.4301	1198	Intergenic	Intergenic	-8397	LOC115709023	LOC115709023	XR_004010143	uncharacterized LOC115709023	lncRNA	-1.466577241	0.856163231	NA	-0.921490471	1	NA
1.1584012431044066e-08-2	NC_044377.1	68041201	68042799	+	80.4181	1598	intron	-intron (LOC115695404, intron 7 of 16)	12501	LOC115695404	LOC115695404	XM_030622469	protein ZINC INDUCED FACILITATOR 1-like	protein_coding	3.16401582	0.431602082	1	0.24845394	1	1
1.1584012431044066e-08-3	NC_044378.1	56306001	56307799	+	80.4181	1798	exon	-exon (LOC115696666, exon 1 of 1)	942	LOC115696666	LOC115696666	XM_030623556	uncharacterized LOC115696666	protein_coding	NA	NA	NA	NA	NA	NA
1.1584012431044066e-08	NC_044374.1	77507201	77508799	+	80.4181	1598	Intergenic	Intergenic	42042	LOC115718006	LOC115718006	XM_030646974	uncharacterized LOC115718006	protein_coding	0	1	NA	-0.998328082	1	NA
4.110750344252523e-10-2	NC_044377.1	66804001	66805599	+	80.4104	1598	Intergenic	Intergenic	-6227	LOC115725319	LOC115725319	XM_030654798	cationic peroxidase 2	protein_coding	0.21118972	1	1	-0.097336322	1	1
4.110750344252523e-10	NC_044372.1	35735801	35738399	+	80.4104	2598	Intergenic	Intergenic	29993	LOC115708688	LOC115708688	XM_030636673	thaumatin-like protein 1b	protein_coding	-4.037476518	NA	NA	-2.368456955	NA	NA
4.036574749996745e-09	NC_044373.1	55288001	55289399	+	80.3741	1398	Intergenic	Intergenic	-49132	LOC115714572	LOC115714572	XR_004011079	uncharacterized LOC115714572	lncRNA	2.082512083	0.193519856	0.749945517	1.281771022	0.713226963	1
0.0001034346664764436-3	NC_044378.1	26101801	26102399	+	80.3741	598	Intergenic	Intergenic	56581	LOC115697886	LOC115697886	XR_004007997	inactive tetrahydrocannabinolic acid synthase-like	transcribed_pseudogene	0	1	1	-8.174514626	3.77387E-07	7.38236E-06
6.9426723196793904e-15	NC_044370.1	70486601	70489799	+	80.3741	3198	Intergenic	Intergenic	-4346	LOC115723794	LOC115723794	XM_030653266	uncharacterized LOC115723794	protein_coding	0	1	NA	-0.998328082	1	NA
0.0001034346664764436-4	NW_022060388.1	41401	42199	+	80.3741	798	NA	NA	NA	NA			#N/A		NA	NA	NA	NA	NA	NA
0.0001034346664764436	NC_044372.1	18656201	18656999	+	80.3741	798	Intergenic	Intergenic	30014	LOC115711581	LOC115711581	XM_030639938	uncharacterized LOC115711581,	protein_coding	-1.722804316	0.004868137	0.033160947	-0.814651741	1	1
0.0001034346664764436-2	NC_044377.1	27708801	27709599	+	80.3741	798	Intergenic	Intergenic	54119	LOC115695672	LOC115695672	XM_030622734	stigma-specific STIG1-like protein 1	protein_coding	0	1	NA	-0.998328082	1	NA
3.374883516955718e-06	NC_044378.1	67919401	67920199	+	80.3741	798	Intergenic	Intergenic	-8804	LOC115697517	LOC115697517	XM_030624557	mitochondrial inner membrane protease subunit 1	protein_coding	1.356463081	0.134625645	0.562833575	0.349118683	1	1
1.4392503747496267e-10	NC_044372.1	50940601	50942199	+	80.3741	1598	Intergenic	Intergenic	172272	LOC115710754	LOC115710754	XM_030639106	uncharacterized mitochondrial protein AtMg00310-like	protein_coding	NA	NA	NA	NA	NA	NA
1.826754374086998e-12	NC_044374.1	57240201	57242599	+	80.3459	2398	Intergenic	Intergenic	127630	LOC115718233	LOC115718233	XR_004011817	small nucleolar RNA R71	snoRNA	NA	NA	NA	NA	NA	NA
1.4089215809767995e-09	NC_044379.1	16536201	16537999	+	80.3353	1798	Intergenic	Intergenic	-5567	LOC115699887	LOC115699887	XM_030627429	GDSL esterase/lipase At1g71691-like	protein_coding	NA	NA	NA	NA	NA	NA
3.9959590432488885e-08	NC_044375.1	18889001	18890599	+	80.3264	1598	Intergenic	Intergenic	26716	LOC115719456	LOC115719456	XM_030648517	cyclin-dependent kinase D-3,	protein_coding	-0.205092863	1	1	0.346064581	1	1
6.428699117473723e-13	NC_044371.1	80253801	80256599	+	80.3201	2798	Intergenic	Intergenic	-20612	LOC115704399	LOC115704399	XM_030631608	uncharacterized LOC115704399	protein_coding	NA	NA	NA	NA	NA	NA
1.1595622348314832e-06	NC_044374.1	3568601	3569599	+	80.312	998	TTS	-TTS (LOC115718327)	690	LOC115718327	LOC115718327	XR_004011906	small nucleolar RNA R71	snoRNA	NA	NA	NA	NA	NA	NA
1.77033959137528e-11	NC_044371.1	54910201	54912199	+	80.312	1998	promoter-TSS	-promoter-TSS (LOC115704145)	-273	LOC115704145	LOC115704145	XM_030631362	uncharacterized LOC115704145	protein_coding	NA	NA	NA	NA	NA	NA
5.333501141439894e-29	NC_044377.1	32534801	32541399	+	80.3087	6598	Intergenic	Intergenic	-44125	LOC115695417	LOC115695417	XM_030622482	indole-3-acetic acid-amido synthetase GH3.6	protein_coding	-2.331835452	0.012394541	0.075113576	-6.449778907	3.61853E-25	3.68228E-23
8.3029759601447e-15	NC_044375.1	43244201	43247199	+	80.3051	2998	Intergenic	Intergenic	-549295	LOC115721317	LOC115721317	XM_030650591	tropomyosin-2-like	protein_coding	1.940454338	0.414144069	1	1.706036753	0.502563852	1
4.924977389608531e-10	NC_044376.1	35929001	35930999	+	80.301	1998	Intergenic	Intergenic	26614	LOC115722879	LOC115722879	XM_030652230	probable serine/threonine-protein kinase WNK9	protein_coding	-1.41658871	0.038826263	0.199614135	-0.840804642	1	1
3.493347602632295e-05-4	NC_044378.1	48802601	48803199	+	80.2853	598	Intergenic	Intergenic	13379	LOC115696618	LOC115696618	XM_030623512	uncharacterized LOC115696618	protein_coding	NA	NA	NA	NA	NA	NA
3.493347602632295e-05	NC_044372.1	83362601	83363599	+	80.2853	998	Intergenic	Intergenic	-12686	LOC115708878	LOC115708878	XM_030636893	AAA-ATPase At3g28580	protein_coding	1.703537663	0.190695933	0.74295661	-0.387473777	1	1
1.389231251487778e-08	NC_044373.1	49432201	49433799	+	80.2853	1598	Intergenic	Intergenic	-63475	LOC115715108	LOC115715108	XM_030643918	NDR1/HIN1-like protein 13	protein_coding	0.833835692	1	1	-1.719989039	0.418439101	1
3.493347602632295e-05-2	NC_044375.1	95203401	95203999	+	80.2853	598	Intergenic	Intergenic	-5822	LOC115721246	LOC115721246	XM_030650503	ubiquitin-fold modifier 1	protein_coding	0.243712269	1	1	-0.033411398	1	1
3.493347602632295e-05-3	NC_044378.1	21938801	21939599	+	80.2853	798	Intergenic	Intergenic	50581	LOC115697125	LOC115697125	XR_004007889	uncharacterized LOC115697125	lncRNA	-0.188966499	1	1	1.519203454	0.834030055	1
3.998149967996684e-07	NW_022060487.1	388201	389599	+	80.2609	1398	NA	NA	NA	NA			#N/A		NA	NA	NA	NA	NA	NA
2.8139332070013978e-14	NC_044374.1	53571401	53573999	+	80.2543	2598	Intergenic	Intergenic	17598	LOC115716619	LOC115716619	XM_030645454	autophagy-related protein 3	protein_coding	-0.151496817	1	1	-0.176285408	1	1
4.839062577727285e-09	NC_044375.1	47183801	47185399	+	80.2495	1598	Intergenic	Intergenic	-5662	LOC115720141	LOC115720141	XM_030649300	uncharacterized LOC115720141	protein_coding	NA	NA	NA	NA	NA	NA
1.1876832681826788e-05	NC_044372.1	25026401	25027799	+	80.218	1398	Intergenic	Intergenic	18275	LOC115709862	LOC115709862	XM_030638093	phenylalanine ammonia-lyase	protein_coding	0.007405935	1	1	-1.726694221	0.145853984	0.794831369
1.6884439353214935e-09	NC_044372.1	38925401	38927599	+	80.218	2198	Intergenic	Intergenic	30285	LOC115710679	LOC115710679	XM_030639031	glycosyltransferase BC10-like	protein_coding	NA	NA	NA	NA	NA	NA
4.794163368314745e-08	NC_044371.1	14233601	14234999	+	80.1816	1398	Intergenic	Intergenic	35469	LOC115704954	LOC115704954	XR_004009362	uncharacterized LOC115704954	lncRNA	0.196411139	1	1	0.261751886	1	1
4.794163368314745e-08-2	NW_022060487.1	117201	118799	+	80.1816	1598	NA	NA	NA	NA			#N/A		NA	NA	NA	NA	NA	NA
4.059525590461843e-06	NC_044378.1	45411201	45411799	+	80.1653	598	Intergenic	Intergenic	-38697	LOC115696594	LOC115696594	XM_030623487	protein UNUSUAL FLORAL ORGANS	protein_coding	2.145257706	0.773507098	NA	2.696098856	0.669954273	NA
1.18742159796447e-14	NC_044371.1	13061401	13064399	+	80.1653	2998	Intergenic	Intergenic	-22013	LOC115705581	LOC115705581	XM_030632951	cytochrome P450 90A1	protein_coding	-4.890019616	2.37888E-52	9.94111E-50	-4.756922285	5.79396E-49	2.10728E-46
6.859225676271397e-18	NC_044370.1	40959801	40963399	+	80.1342	3598	Intergenic	Intergenic	-7625	LOC115702583	LOC115702583	XR_004008928	uncharacterized LOC115702583	lncRNA	0	1	1	-7.256510179	0.000735285	0.00827512
0.00037379685350367157	NC_044370.1	104372401	104372999	+	80.1229	598	Intergenic	Intergenic	6695	LOC115702315	LOC115702315	XM_030629761	uncharacterized LOC115702315	protein_coding	-4.713822238	2.76743E-16	1.28189E-14	-5.296972211	1.1473E-21	9.27282E-20
0.00037379685350367157-3	NC_044375.1	40638801	40639399	+	80.1229	598	Intergenic	Intergenic	-57247	LOC115720090	LOC115720090	XM_030649252	uncharacterized LOC115720090	protein_coding	NA	NA	NA	NA	NA	NA
0.00037379685350367157-4	NC_044377.1	41146401	41146799	+	80.1229	398	Intergenic	Intergenic	45597	LOC115724718	LOC115724718	XR_004013262	uncharacterized LOC115724718	lncRNA	NA	NA	NA	NA	NA	NA
0.00037379685350367157-5	NC_044377.1	69669601	69670199	+	80.1229	598	Intergenic	Intergenic	5996	LOC115695934	LOC115695934	XM_030623032	mitochondrial arginine transporter BAC1,	protein_coding	-0.476466063	1	1	-0.10544335	1	1
0.00037379685350367157-6	NC_044378.1	21714601	21714999	+	80.1229	398	Intergenic	Intergenic	7567	LOC115696423	LOC115696423	XM_030623325	uncharacterized LOC115696423	protein_coding	NA	NA	NA	NA	NA	NA
0.00037379685350367157-2	NC_044371.1	89497801	89498399	+	80.1229	598	exon	-exon (LOC115704531, exon 2 of 3)	217	LOC115704531	LOC115704531	XM_030631732	uncharacterized LOC115704531	protein_coding	0	1	NA	-0.998328082	1	NA
1.3936401194563412e-06	NC_044378.1	41411201	41411999	+	80.1229	798	Intergenic	Intergenic	-57041	LOC115697776	LOC115697776	XM_030624901	ras-related protein RABF2a	protein_coding	0.194302364	1	1	0.142296533	1	1
1.849953486706165e-16	NC_044370.1	103993001	103997799	+	80.1106	4798	Intergenic	Intergenic	8820	LOC115702076	LOC115702076	XM_030629523	low affinity sulfate transporter 3	protein_coding	-0.34489233	1	1	0.644357675	1	1
4.80190985487765e-07-2	NC_044377.1	65555001	65556399	+	80.0881	1398	Intergenic	Intergenic	-6034	LOC115695377	LOC115695377	XM_030622444	uncharacterized LOC115695377	protein_coding	NA	NA	NA	NA	NA	NA
4.80190985487765e-07	NC_044374.1	44996001	44997199	+	80.0881	1198	Intergenic	Intergenic	44781	LOC115717783	LOC115717783	XM_030646758	uncharacterized LOC115717783	protein_coding	NA	NA	NA	NA	NA	NA
0.00012490661647250568	NC_044371.1	62913401	62914199	+	80.059	798	Intergenic	Intergenic	9734	LOC115704203	LOC115704203	XM_030631420	putative disease resistance RPP13-like protein 1	protein_coding	NA	NA	NA	NA	NA	NA
0.00012490661647250568-4	NC_044375.1	10724401	10725199	+	80.059	798	Intergenic	Intergenic	-20480	LOC115719847	LOC115719847	XM_030649033	uncharacterized LOC115719847	protein_coding	NA	NA	NA	NA	NA	NA
0.00012490661647250568-5	NC_044377.1	49093201	49093799	+	80.059	598	Intergenic	Intergenic	12394	LOC115694809	LOC115694809	XM_030621901	DEAD-box ATP-dependent RNA helicase 10	protein_coding	0.054831471	1	1	0.653710556	1	1
0.00012490661647250568-3	NC_044373.1	62042601	62043199	+	80.059	598	Intergenic	Intergenic	-26451	LOC115715378	LOC115715378	XR_004011253	small nucleolar RNA R71	snoRNA	-1.549169232	0.892939793	NA	0	1	NA
2.472750788099502e-10	NC_044377.1	52465801	52467399	+	80.059	1598	Intergenic	Intergenic	131202	LOC115696088	LOC115696088	XR_004007686	small nucleolar RNA R71	snoRNA	NA	NA	NA	NA	NA	NA
1.6596785832044586e-07	NC_044371.1	13066001	13067199	+	80.059	1198	Intergenic	Intergenic	-25713	LOC115705581	LOC115705581	XM_030632951	cytochrome P450 90A1	protein_coding	-4.890019616	2.37888E-52	9.94111E-50	-4.756922285	5.79396E-49	2.10728E-46
0.00012490661647250568-6	NC_044378.1	12524601	12525199	+	80.059	598	Intergenic	Intergenic	26919	LOC115696356	LOC115696356	XM_030623259	copper transporter 1-like	protein_coding	NA	NA	NA	NA	NA	NA
0.00012490661647250568-2	NC_044373.1	56238201	56238799	+	80.059	598	Intergenic	Intergenic	-109582	LOC115715355	LOC115715355	XR_004011231	small nucleolar RNA R71	snoRNA	NA	NA	NA	NA	NA	NA
5.7516228388153725e-08	NC_044378.1	39774801	39776399	+	80.0342	1598	Intergenic	Intergenic	3774	LOC115696563	LOC115696563	XM_030623457	uncharacterized LOC115696563	protein_coding	NA	NA	NA	NA	NA	NA
4.211657232902156e-05-3	NC_044374.1	41518801	41519599	+	80.0129	798	Intergenic	Intergenic	-48158	LOC115716678	LOC115716678	XM_030645530	#N/A	protein_coding	0.951835487	1	1	-0.235594073	1	1
4.211657232902156e-05-5	NC_044377.1	47130401	47131399	+	80.0129	998	Intergenic	Intergenic	-36937	LOC115695223	LOC115695223	XM_030622304	uncharacterized LOC115695223	protein_coding	NA	NA	NA	NA	NA	NA
1.9978399836620437e-08	NC_044377.1	25186401	25187999	+	80.0129	1598	Intergenic	Intergenic	75774	LOC115695061	LOC115695061	XM_030622158	uncharacterized LOC115695061	protein_coding	NA	NA	NA	NA	NA	NA
4.211657232902156e-05-2	NC_044374.1	31124001	31124799	+	80.0129	798	Intergenic	Intergenic	-30200	LOC115717703	LOC115717703	XM_030646683	hepatitis A virus cellular receptor 1-like	protein_coding	NA	NA	NA	NA	NA	NA
4.211657232902156e-05-6	NC_044378.1	15770401	15771399	+	80.0129	998	Intergenic	Intergenic	24882	LOC115698369	LOC115698369	XR_004008121	small nucleolar RNA R71	snoRNA	NA	NA	NA	NA	NA	NA
4.211657232902156e-05-4	NC_044377.1	43367801	43368399	+	80.0129	598	Intergenic	Intergenic	-307881	LOC115695201	LOC115695201	XM_030622286	uncharacterized LOC115695201	protein_coding	NA	NA	NA	NA	NA	NA
4.211657232902156e-05	NC_044371.1	45850601	45851599	+	80.0129	998	Intergenic	Intergenic	94595	LOC115707669	LOC115707669	XM_030635695	EPIDERMAL PATTERNING FACTOR-like protein 6	protein_coding	0.374390277	1	NA	-3.112451905	0.383641416	1
6.953615921056761e-09	NC_044370.1	59829801	59831399	+	79.9945	1598	Intergenic	Intergenic	-19437	LOC115722709	LOC115722709	XM_030651988	uncharacterized LOC115722709	protein_coding	NA	NA	NA	NA	NA	NA
1.4300744587863006e-05	NC_044371.1	13779601	13780399	+	79.9783	798	Intergenic	Intergenic	-7958	LOC115707808	LOC115707808	XM_030635878	60S ribosomal protein L35a-1-like	protein_coding	0.69597725	1	1	0.832992023	1	1
1.4300744587863006e-05-5	NC_044377.1	26795401	26796199	+	79.9783	798	Intergenic	Intergenic	74861	LOC115696119	LOC115696119	XR_004007714	small nucleolar RNA R71	snoRNA	NA	NA	NA	NA	NA	NA
1.4300744587863006e-05-4	NC_044372.1	64262801	64263399	+	79.9783	598	Intergenic	Intergenic	-37074	LOC115710858	LOC115710858	XM_030639214	uncharacterized LOC115710858	protein_coding	NA	NA	NA	NA	NA	NA
1.4300744587863006e-05-3	NC_044371.1	62228801	62229599	+	79.9783	798	Intergenic	Intergenic	26468	LOC115704194	LOC115704194	XM_030631410	uncharacterized LOC115704194	protein_coding	NA	NA	NA	NA	NA	NA
4.107661172317534e-24	NC_044377.1	22952401	22958199	+	79.9783	5798	Intergenic	Intergenic	-19361	LOC115695057	LOC115695057	XM_030622155	uncharacterized LOC115695057	protein_coding	-1.549169232	0.892939793	NA	0	1	NA
2.424587859733732e-09	NC_044372.1	6595401	6597199	+	79.9783	1798	Intergenic	Intergenic	-5104	LOC115708944	LOC115708944	XM_030636973	palmitoyl-acyl carrier protein thioesterase, chloroplastic	protein_coding	-0.762149767	1	1	-3.328804795	0.036643056	0.254570084
1.4300744587863006e-05-2	NC_044371.1	46745401	46746199	+	79.9783	798	Intergenic	Intergenic	6601	LOC115706032	LOC115706032	XM_030633533	protein NDL1	protein_coding	-0.280812937	1	1	-0.676948499	1	1
4.8830254232958424e-06	NC_044372.1	59159401	59160399	+	79.9512	998	Intergenic	Intergenic	14756	LOC115711446	LOC115711446	XM_030639791	uncharacterized LOC115711446	protein_coding	0	1	NA	-0.998328082	1	NA
4.8830254232958424e-06-3	NC_044373.1	43314601	43315599	+	79.9512	998	Intergenic	Intergenic	69107	LOC115713438	LOC115713438	XM_030641921	uncharacterized LOC115713438	protein_coding	0.374376113	1	NA	0.925217262	1	NA
4.8830254232958424e-06-4	NC_044373.1	52302801	52303799	+	79.9512	998	Intergenic	Intergenic	-42979	LOC115713502	LOC115713502	XM_030641985	uncharacterized LOC115713502	protein_coding	NA	NA	NA	NA	NA	NA
4.8830254232958424e-06-5	NC_044377.1	32813801	32814799	+	79.9512	998	Intergenic	Intergenic	-190824	LOC115695107	LOC115695107	XM_030622197	uncharacterized LOC115695107	protein_coding	NA	NA	NA	NA	NA	NA
4.8830254232958424e-06-2	NC_044373.1	41421801	41423199	+	79.9512	1398	Intergenic	Intergenic	16541	LOC115715294	LOC115715294	XM_030644145	heavy metal-associated isoprenylated plant protein 22	protein_coding	-2.127777094	4.81496E-08	8.46051E-07	-2.263994222	9.08556E-10	2.45111E-08
7.164755661309806e-15	NC_044378.1	11830001	11832599	+	79.9434	2598	Intergenic	Intergenic	-14452	LOC115697747	LOC115697747	XM_030624867	mitochondrial substrate carrier family protein B	protein_coding	-0.97060482	1	1	-0.005593487	1	1
1.2760158608652129e-11	NC_044377.1	8819401	8821799	+	79.9201	2398	Intergenic	Intergenic	-28502	LOC115724830	LOC115724830	XM_030654179	CCR4-NOT transcription complex subunit 10,	protein_coding	-0.404104435	1	1	0.297389975	1	1
5.767106251306849e-07	NC_044372.1	48129601	48130799	+	79.9117	1198	Intergenic	Intergenic	-50468	LOC115711879	LOC115711879	XR_004010747	small nucleolar RNA R71	snoRNA	NA	NA	NA	NA	NA	NA
4.48268590886274e-12	NC_044377.1	24684601	24686799	+	79.9117	2198	Intergenic	Intergenic	183552	LOC115695060	LOC115695060	XM_030622157	uncharacterized LOC115695060	protein_coding	NA	NA	NA	NA	NA	NA
1.9533457038764828e-13	NC_044377.1	45793201	45795999	+	79.8902	2798	Intergenic	Intergenic	48101	LOC115725520	LOC115725520	XM_030655072	transcription factor bHLH146	protein_coding	-1.549194907	0.767408546	1	-7.274527154	1.39288E-05	0.000214055
1.1835896125839173e-26	NC_044374.1	38951201	38956399	+	79.8786	5198	exon	-exon (LOC115715830, exon 7 of 11)	2525	LOC115715830	LOC115715830	XM_030644497	uncharacterized LOC115715830	protein_coding	-1.119422719	0.772643322	1	-0.038299871	1	1
8.33510437313624e-09	NC_044379.1	35389001	35390599	+	79.864	1598	Intergenic	Intergenic	-7663	LOC115701095	LOC115701095	XM_030628791	uncharacterized LOC115701095,	protein_coding	-3.12856876	9.10865E-17	4.4216E-15	-1.370739366	0.148204112	0.804573004
5.042071843988563e-59	NC_044372.1	55692601	55705199	+	79.8263	12598	Intergenic	Intergenic	3667	TRNAL-CAA_2	TRNAL-CAA_2	TRNAL-CAA_2	#N/A	tRNA	0.374376113	1	NA	0.925217262	1	NA
1.527073486635502e-11	NC_044372.1	11600001	11601999	+	79.8263	1998	Intergenic	Intergenic	-32071	LOC115709155	LOC115709155	XM_030637192	WRKY transcription factor 72A	protein_coding	-0.476839771	1	1	-2.007123654	0.59786612	1
2.3361212113954396e-13	NC_044370.1	70497001	70499599	+	79.8112	2598	Intergenic	Intergenic	5754	LOC115723794	LOC115723794	XM_030653266	uncharacterized LOC115723794	protein_coding	0	1	NA	-0.998328082	1	NA
1.0240491545836306e-14	NC_044378.1	34186201	34189199	+	79.8027	2998	Intergenic	Intergenic	11985	LOC115697909	LOC115697909	XM_030625076	kiwellin-like	protein_coding	-1.549145827	0.892944328	NA	-2.847854566	0.642030726	NA
8.277531168293457e-08	NC_044374.1	35191201	35192399	+	79.7314	1198	Intergenic	Intergenic	116141	LOC115717713	LOC115717713	XM_030646693	uncharacterized LOC115717713	protein_coding	NA	NA	NA	NA	NA	NA
2.391005709484496e-07-2	NC_044377.1	39682001	39683399	+	79.7314	1398	intron	-intron (LOC115725731, intron 4 of 6)	9297	LOC115725731	LOC115725731	XM_030655325	oxysterol-binding protein-related protein 4C	protein_coding	0.37438412	1	NA	-0.036563417	1	NA
2.01298347716392e-06-3	NC_044373.1	9871001	9871599	+	79.7314	598	Intergenic	Intergenic	-41419	LOC115713916	LOC115713916	XM_030642395	NLR family CARD domain-containing protein 3,	protein_coding	-0.870034959	1	1	0.055312847	1	1
2.01298347716392e-06-5	NC_044378.1	17947001	17948199	+	79.7314	1198	Intergenic	Intergenic	27584	LOC115698035	LOC115698035	XR_004008023	uncharacterized LOC115698035	lncRNA	0.374392346	1	NA	-1.024622113	0.995125176	NA
2.01298347716392e-06-2	NC_044370.1	68866001	68866799	+	79.7314	798	Intergenic	Intergenic	-61210	LOC115723731	LOC115723731	XM_030653211	uncharacterized LOC115723731	protein_coding	NA	NA	NA	NA	NA	NA
6.92612568985981e-07	NC_044372.1	68124201	68125199	+	79.7314	998	Intergenic	Intergenic	23384	LOC115710882	LOC115710882	XM_030639235	uncharacterized LOC115710882	protein_coding	NA	NA	NA	NA	NA	NA
0.00015084786951218246	NC_044374.1	53075801	53076399	+	79.7314	598	Intergenic	Intergenic	-32998	LOC115715815	LOC115715815	XM_030644486	zinc finger protein ZAT4	protein_coding	0.9233437	1	1	-2.550842059	0.374351506	1
0.00045243935591337647	NC_044374.1	41489201	41489799	+	79.7314	598	Intergenic	Intergenic	-64085	LOC115716786	LOC115716786	XR_004011601	uncharacterized LOC115716786	lncRNA	NA	NA	NA	NA	NA	NA
8.277531168293457e-08-2	NC_044377.1	69888201	69889999	+	79.7314	1798	intron	-intron (LOC115725494, intron 10 of 10)	-4302	LOC115725497	LOC115725497	XR_004013413	uncharacterized LOC115725497	lncRNA	0.34268692	1	1	0.302032288	1	1
5.0778514651508734e-05	NC_044373.1	32405601	32406399	+	79.7314	798	Intergenic	Intergenic	-15610	LOC115714953	LOC115714953	XM_030643716	phosphatidylinositol transfer protein 3	protein_coding	-1.912259529	0.002341361	0.017364188	-1.587186717	0.050021719	0.328797927
2.391005709484496e-07	NC_044375.1	10831801	10832399	+	79.7314	598	Intergenic	Intergenic	-56378	LOC115721386	LOC115721386	XM_030650672	uncharacterized LOC115721386	protein_coding	NA	NA	NA	NA	NA	NA
2.01298347716392e-06	NC_044370.1	59242001	59242999	+	79.7314	998	Intergenic	Intergenic	-34370	LOC115713085	LOC115713085	XM_030641571	putative methyltransferase At1g22800, mitochondrial	protein_coding	0.234687955	1	1	-0.143139935	1	1
6.92612568985981e-07-2	NC_044376.1	3886601	3887599	+	79.7314	998	Intergenic	Intergenic	-5245	LOC115722773	LOC115722773	XM_030652082	pyruvate dehydrogenase (acetyl-transferring) kinase, mitochondrial	protein_coding	-1.841004531	3.78161E-09	7.77475E-08	-1.708267552	6.48297E-07	1.22193E-05
2.01298347716392e-06-4	NC_044375.1	70039801	70040799	+	79.7314	998	Intergenic	Intergenic	-36251	LOC115720599	LOC115720599	XM_030649747	protein DJ-1 homolog D	protein_coding	-0.420777714	1	1	0.189028904	1	1
5.0778514651508734e-05-2	NC_044377.1	35158601	35159399	+	79.7314	798	Intergenic	Intergenic	-15363	LOC115724869	LOC115724869	XM_030654230	transcription factor MYB102	protein_coding	8.589047796	4.15774E-05	0.000453342	3.23629783	0.150818717	0.814653356
9.990667800477252e-09	NC_044374.1	23483601	23485399	+	79.7314	1798	Intergenic	Intergenic	24729	LOC115717364	LOC115717364	XM_030646332	dehydration-responsive element-binding protein 1E-like	protein_coding	-1.627227466	0.338313853	1	-2.631081514	0.009905093	0.082465459
6.92612568985981e-07-3	NC_044379.1	49730201	49730999	+	79.7314	798	Intergenic	Intergenic	-9455	LOC115701084	LOC115701084	XM_030628784	RNA exonuclease 4	protein_coding	-6.433922666	7.42201E-13	2.36606E-11	-4.048383768	7.54496E-05	0.001019841
2.793800555498913e-13	NC_044378.1	61874801	61876799	+	79.7314	1998	Intergenic	Intergenic	-23435	LOC115697475	LOC115697475	XM_030624497	berberine bridge enzyme-like 15	protein_coding	4.482718522	2.49117E-10	5.91208E-09	1.658909656	0.204489972	1
0.00015084786951218246-2	NC_044375.1	38980201	38981199	+	79.7314	998	Intergenic	Intergenic	-43299	LOC115720912	LOC115720912	XM_030650119	auxin-responsive protein SAUR50	protein_coding	-1.549169232	0.892939793	NA	0	1	NA
5.8735326040563165e-06-3	NC_044379.1	35036001	35036799	+	79.7314	798	Intergenic	Intergenic	-5792	LOC115701621	LOC115701621	XR_004008614	small nucleolar RNA R71	snoRNA	NA	NA	NA	NA	NA	NA
5.8735326040563165e-06-5	NW_022060453.1	37601	38399	+	79.7314	798	Intergenic	Intergenic	-11923	LOC115702118	LOC115702118	XM_030629576	#N/A	protein_coding	NA	NA	NA	NA	NA	NA
5.8735326040563165e-06-4	NC_044379.1	50729801	50730599	+	79.7314	798	Intergenic	Intergenic	12341	LOC115700826	LOC115700826	XM_030628487	squamosa promoter-binding protein 1,	protein_coding	-1.303125831	0.078760023	0.362952242	-1.039206596	0.819564178	1
4.2469151773224677e-10	NC_044378.1	14130001	14131799	+	79.7314	1798	Intergenic	Intergenic	9523	LOC115696363	LOC115696363	XM_030623264	uncharacterized LOC115696363	protein_coding	NA	NA	NA	NA	NA	NA
1.7219511483352538e-05	NC_044371.1	66293601	66294199	+	79.7314	598	promoter-TSS	-promoter-TSS (LOC115705108)	-1806	LOC115705108	LOC115705108	XM_030632349	F-box/FBD/LRR-repeat protein At2g26030	protein_coding	1.948000442	0.296418142	1	3.807656251	0.003586328	0.033652884
5.8735326040563165e-06	NC_044373.1	61258401	61259599	+	79.7314	1198	Intergenic	Intergenic	-15044	LOC115715172	LOC115715172	XM_030643999	uncharacterized LOC115715172,	protein_coding	1.586574896	0.429606291	1	0.33296584	1	1
1.214993854678874e-09	NC_044371.1	79621201	79623199	+	79.7314	1998	Intergenic	Intergenic	3735	LOC115705896	LOC115705896	XM_030633352	acidic endochitinase	protein_coding	-1.336320709	0.785044257	1	0.961248117	1	1
6.74253078887007e-17	NC_044377.1	43991001	43995399	+	79.7314	4398	Intergenic	Intergenic	-110832	LOC115695668	LOC115695668	XM_030622727	uncharacterized protein At1g66480	protein_coding	3.167632037	5.83816E-07	8.59824E-06	3.239340754	1.76875E-07	3.63751E-06
5.8735326040563165e-06-2	NC_044374.1	72962201	72962999	+	79.7314	798	Intergenic	Intergenic	-5000	LOC115717103	LOC115717103	XM_030646046	IRK-interacting protein	protein_coding	-1.253695489	0.399104654	1	-2.279218733	2.00299E-05	0.000300066
8.444680377494185e-18	NC_044373.1	42829401	42833199	+	79.7314	3798	intron	-intron (LOC115713437, intron 2 of 2)	692	LOC115713437	LOC115713437	XM_030641920	stress response protein NST1-like	protein_coding	-0.587400514	1	NA	-0.920448172	1	NA
6.23475943973712e-11	NC_044372.1	75770601	75773199	+	79.6307	2598	Intergenic	Intergenic	-22809	LOC115710943	LOC115710943	XM_030639291	uncharacterized LOC115710943	protein_coding	NA	NA	NA	NA	NA	NA
1.7795487057963412e-10	NC_044370.1	48557401	48559799	+	79.6253	2398	Intergenic	Intergenic	-16273	LOC115721091	LOC115721091	XM_030650338	uncharacterized LOC115721091	protein_coding	NA	NA	NA	NA	NA	NA
4.170975737146188e-09	NC_044374.1	42708201	42710199	+	79.6053	1998	Intergenic	Intergenic	7841	LOC115717225	LOC115717225	XM_030646197	#N/A	protein_coding	0.022299284	1	1	0.040720356	1	1
1.1974589955574869e-08	NC_044371.1	68109401	68111399	+	79.5968	1998	Intergenic	Intergenic	-24414	LOC115704279	LOC115704279	XM_030631493	uncharacterized LOC115704279	protein_coding	-0.510532929	1	1	1.184279605	0.820653356	1
1.7493781643761053e-14	NC_044371.1	26869001	26871999	+	79.5871	2998	Intergenic	Intergenic	3569	LOC115708288	LOC115708288	XM_030636516	organic cation/carnitine transporter 3-like	protein_coding	NA	NA	NA	NA	NA	NA
2.8697080534222396e-07	NC_044373.1	35809601	35810799	+	79.5628	1198	Intergenic	Intergenic	-16087	LOC115712711	LOC115712711	XM_030641049	protein FREE1,	protein_coding	0.167539871	1	1	-0.158137363	1	1
8.317841892498489e-07-3	NW_022060454.1	636601	637599	+	79.5473	998	Intergenic	Intergenic	132942	LOC115702127	LOC115702127	XM_030629586	#N/A	protein_coding	-1.214863418	0.74862229	1	-0.136444746	1	1
8.317841892498489e-07-2	NC_044375.1	64442801	64444799	+	79.5473	1998	Intergenic	Intergenic	21238	LOC115720257	LOC115720257	XM_030649412	uncharacterized LOC115720257	protein_coding	NA	NA	NA	NA	NA	NA
8.317841892498489e-07	NC_044371.1	46188801	46190399	+	79.5473	1598	promoter-TSS	-promoter-TSS (LOC115706656)	-1433	LOC115706656	LOC115706656	XR_004009615	uncharacterized LOC115706656,	lncRNA	2.839846968	0.536002769	NA	0.926144751	1	1
1.1500618639470336e-16	NC_044371.1	43539601	43542599	+	79.5473	2998	Intergenic	Intergenic	17262	LOC115708324	LOC115708324	XM_030636565	ATP synthase subunit alpha, chloroplastic	protein_coding	-1.530746015	0.163438258	0.656999922	-0.815220211	1	1
2.6167802959965376e-11	NC_044374.1	70272201	70273799	+	79.5384	1598	Intergenic	Intergenic	-5946	LOC115718265	LOC115718265	XR_004011848	small nucleolar RNA R71	snoRNA	NA	NA	NA	NA	NA	NA
2.4192015850378194e-06	NC_044372.1	58329001	58330199	+	79.5287	1198	Intergenic	Intergenic	30614	LOC115710804	LOC115710804	XM_030639155	uncharacterized LOC115710804	protein_coding	0.37439708	1	NA	-1.593347587	0.881791434	NA
7.462070431505979e-11	NC_044375.1	83231201	83233399	+	79.5287	2198	Intergenic	Intergenic	5726	LOC115721253	LOC115721253	XM_030650510	uncharacterized protein At5g39865,	protein_coding	0.70302185	1	1	0.388958017	1	1
2.0910905917092483e-14	NC_044375.1	34491201	34492799	+	79.514	1598	Intergenic	Intergenic	-33171	LOC115720039	LOC115720039	XM_030649204	uncharacterized LOC115720039	protein_coding	NA	NA	NA	NA	NA	NA
2.1561059057648058e-18	NC_044377.1	24581001	24584999	+	79.512	3998	Intergenic	Intergenic	286252	LOC115695060	LOC115695060	XM_030622157	uncharacterized LOC115695060	protein_coding	NA	NA	NA	NA	NA	NA
7.064898599489398e-06-5	NC_044375.1	34618201	34619799	+	79.5058	1598	promoter-TSS	-promoter-TSS (LOC115719044)	-1747	LOC115719044	LOC115719044	XR_004012121	uncharacterized LOC115719044	lncRNA	NA	NA	NA	NA	NA	NA
7.064898599489398e-06-3	NC_044371.1	57539801	57540599	+	79.5058	798	Intergenic	Intergenic	-31859	LOC115705685	LOC115705685	XM_030633083	protein MID1-COMPLEMENTING ACTIVITY 1,	protein_coding	2.278352004	0.022347787	0.124231204	1.103640782	0.820621476	1
7.064898599489398e-06-4	NC_044374.1	54592401	54593799	+	79.5058	1398	Intergenic	Intergenic	-84041	LOC115718196	LOC115718196	XR_004011781	small nucleolar RNA R71	snoRNA	NA	NA	NA	NA	NA	NA
7.064898599489398e-06-7	NC_044377.1	44220201	44220999	+	79.5058	798	Intergenic	Intergenic	15580	LOC115724943	LOC115724943	XM_030654320	ubiquitin thioesterase OTU1,	protein_coding	-0.292217158	1	1	0.204237474	1	1
7.064898599489398e-06	NC_044370.1	38225801	38226799	+	79.5058	998	Intergenic	Intergenic	-21141	LOC115710594	LOC115710594	XM_030638955	#N/A	protein_coding	-1.123621975	0.724688754	1	-0.482413937	1	1
7.064898599489398e-06-2	NC_044370.1	47786401	47787199	+	79.5058	798	Intergenic	Intergenic	5840	LOC115711376	LOC115711376	XM_030639713	receptor-like protein 44	protein_coding	-0.470794843	1	1	0.129089197	1	1
7.064898599489398e-06-6	NC_044375.1	66037601	66039199	+	79.5058	1598	Intergenic	Intergenic	16677	LOC115720985	LOC115720985	XM_030650210	uncharacterized LOC115720985	protein_coding	0.29074805	1	1	-0.39181932	1	1
6.089481910614945e-10	NC_044375.1	40390001	40391999	+	79.5058	1998	Intergenic	Intergenic	12511	LOC115718449	LOC115718449	XM_030647232	heat stress transcription factor B-4d	protein_coding	6.655778964	0.000512205	0.00451864	3.722002442	0.031386353	0.222216288
2.0734174386085882e-05	NC_044375.1	87400801	87401799	+	79.4772	998	Intergenic	Intergenic	-6754	LOC115721115	LOC115721115	XM_030650360	calmodulin-binding receptor kinase CaMRLK	protein_coding	0.226372222	1	1	-0.678124313	1	1
6.122412728600763e-05	NC_044371.1	59372001	59372799	+	79.4403	798	Intergenic	Intergenic	-3417	LOC115704179	LOC115704179	XM_030631394	probable truncated L-gulonolactone oxidase 7, mitochondrial	protein_coding	0.137812282	1	NA	1.650442118	0.872483735	NA
4.129904328923521e-08-3	NC_044372.1	63832601	63833999	+	79.4403	1398	Intergenic	Intergenic	-20997	LOC115710251	LOC115710251	XM_030638606	replication protein A 70 kDa DNA-binding subunit B	protein_coding	4.772590804	0.000313687	0.002885172	1.638332345	0.519567573	1
6.122412728600763e-05-2	NC_044377.1	74429601	74430199	+	79.4403	598	Intergenic	Intergenic	-14692	LOC115725121	LOC115725121	XM_030654551	purple acid phosphatase 2	protein_coding	-2.220581479	0.000141403	0.001388252	0.419671381	1	1
4.129904328923521e-08	NC_044370.1	7984401	7985799	+	79.4403	1398	Intergenic	Intergenic	2278	LOC115715518	LOC115715518	XM_030644205	uncharacterized LOC115715518	protein_coding	NA	NA	NA	NA	NA	NA
4.129904328923521e-08-2	NC_044370.1	66214001	66215599	+	79.4403	1598	Intergenic	Intergenic	15959	LOC115723469	LOC115723469	XM_030652964	uncharacterized LOC115723469	protein_coding	NA	NA	NA	NA	NA	NA
1.1910995311385239e-07-2	NC_044377.1	28610601	28612799	+	79.4175	2198	Intergenic	Intergenic	-101294	LOC115695075	LOC115695075	XM_030622169	uncharacterized LOC115695075	protein_coding	NA	NA	NA	NA	NA	NA
1.1910995311385239e-07	NC_044373.1	2570001	2571199	+	79.4175	1198	Intergenic	Intergenic	-15067	LOC115714189	LOC115714189	XM_030642767	protein TIFY 6B,	protein_coding	-1.804836987	0.022301327	0.124008795	-1.448234038	0.203089176	1
0.00018219140300119104-2	NC_044377.1	24778001	24778599	+	79.3908	598	Intergenic	Intergenic	90952	LOC115695060	LOC115695060	XM_030622157	uncharacterized LOC115695060	protein_coding	NA	NA	NA	NA	NA	NA
3.4441328565726004e-07-2	NC_044375.1	6537401	6538599	+	79.3908	1198	Intergenic	Intergenic	10716	LOC115718597	LOC115718597	XM_030647408	uncharacterized LOC115718597	protein_coding	-0.102300645	1	1	0.033352012	1	1
0.00018219140300119104	NC_044371.1	40708401	40708799	+	79.3908	398	Intergenic	Intergenic	-16165	LOC115708065	LOC115708065	XM_030636238	uncharacterized protein At4g00950	protein_coding	2.185531161	0.026070206	0.142048633	1.728539354	0.167026592	0.882444042
0.00018219140300119104-3	NC_044377.1	44046201	44046799	+	79.3908	598	Intergenic	Intergenic	-57532	LOC115695668	LOC115695668	XM_030622727	uncharacterized protein At1g66480	protein_coding	3.167632037	5.83816E-07	8.59824E-06	3.239340754	1.76875E-07	3.63751E-06
3.4441328565726004e-07-4	NC_044377.1	23713601	23714799	+	79.3908	1198	Intergenic	Intergenic	-16005	LOC115725721	LOC115725721	XM_030655317	peroxidase 45	protein_coding	1.548133297	0.890431482	NA	-1.407097322	0.915660787	1
3.4441328565726004e-07-3	NC_044375.1	37829001	37830799	+	79.3908	1798	Intergenic	Intergenic	15341	LOC115720058	LOC115720058	XM_030649221	uncharacterized mitochondrial protein AtMg00860-like	protein_coding	NA	NA	NA	NA	NA	NA
3.4441328565726004e-07	NC_044374.1	7212601	7213799	+	79.3908	1198	Intergenic	Intergenic	-18166	LOC115715590	LOC115715590	XM_030644231	probable 28S rRNA (cytosine-C(5))-methyltransferase	protein_coding	0.96717564	1	1	1.185349497	0.350274631	1
2.087685143846391e-09	NW_022060454.1	492001	493799	+	79.3703	1798	Intergenic	Intergenic	-11258	LOC115702127	LOC115702127	XM_030629586	#N/A	protein_coding	-1.214863418	0.74862229	1	-0.136444746	1	1
9.98891256111672e-07	NW_022060522.1	14001	14999	+	79.3591	998	Intergenic	Intergenic	-4390	LOC115702294	LOC115702294	XM_030629742	#N/A	protein_coding	NA	NA	NA	NA	NA	NA
5.9870678297575175e-09	NC_044370.1	21674401	21675999	+	79.3472	1598	TTS	-TTS (LOC115702431)	844	LOC115702431	LOC115702431	XM_030629893	uncharacterized LOC115702431	protein_coding	0.374376113	1	NA	0.925217262	1	NA
5.9870678297575175e-09-2	NC_044374.1	80838401	80840199	+	79.3472	1798	intron	-intron (LOC115718054, intron 2 of 5)	4878	LOC115718054	LOC115718054	XM_030647018	uncharacterized LOC115718054	protein_coding	0	1	NA	-3.504756341	0.526028277	NA
3.961620203736585e-25	NC_044375.1	91727401	91733199	+	79.3448	5798	promoter-TSS	-promoter-TSS (LOC115721454)	-1727	LOC115721454	LOC115721454	XR_004012476	small nucleolar RNA R71	snoRNA	NA	NA	NA	NA	NA	NA
1.720041397422322e-08-2	NC_044378.1	27672001	27673599	+	79.321	1598	Intergenic	Intergenic	-50414	LOC115696873	LOC115696873	XM_030623759	late embryogenesis abundant protein, group 3	protein_coding	-5.696975027	8.36202E-09	1.63025E-07	-8.031145543	4.97534E-18	2.84057E-16
1.720041397422322e-08	NC_044376.1	25894801	25896399	+	79.321	1598	Intergenic	Intergenic	-47574	LOC115722772	LOC115722772	XM_030652081	PHD finger protein At1g33420	protein_coding	0.120490874	1	1	-0.074932439	1	1
1.9414693713359965e-12	NC_044372.1	68621601	68623999	+	79.3035	2398	TTS	-TTS (TRNAT-UGU)	367	TRNAT-UGU	TRNAT-UGU	TRNAT-UGU	#N/A	tRNA	0.014222188	1	NA	1.449552286	0.834868686	NA
1.9414693713359965e-12-2	NC_044377.1	43635601	43638199	+	79.3035	2598	Intergenic	Intergenic	-467132	LOC115695668	LOC115695668	XM_030622727	uncharacterized protein At1g66480	protein_coding	3.167632037	5.83816E-07	8.59824E-06	3.239340754	1.76875E-07	3.63751E-06
8.49783018362018e-06-2	NC_044377.1	13034601	13035399	+	79.2742	798	Intergenic	Intergenic	11721	LOC115696103	LOC115696103	XR_004007701	small nucleolar RNA R71	snoRNA	NA	NA	NA	NA	NA	NA
8.49783018362018e-06	NC_044374.1	56423001	56423999	+	79.2742	998	Intergenic	Intergenic	16962	LOC115716452	LOC115716452	XM_030645253	xyloglucan galactosyltransferase XLT2-like	protein_coding	-0.387685935	1	1	-0.852397096	1	1
5.641395833243169e-25	NC_044374.1	60604201	60609999	+	79.2653	5798	Intergenic	Intergenic	126932	LOC115715646	LOC115715646	XR_004011405	uncharacterized LOC115715646	lncRNA	0.416365959	1	NA	1.928995795	0.817669681	NA
2.50029307223517e-09	NC_044370.1	77775201	77776799	+	79.2465	1598	Intergenic	Intergenic	-10058	LOC115717605	LOC115717605	XM_030646589	universal stress protein PHOS34,	protein_coding	0.304232399	1	1	0.246680234	1	1
2.4966401497220705e-05-2	NC_044379.1	30171601	30172399	+	79.2153	798	Intergenic	Intergenic	5215	LOC115701605	LOC115701605	XR_004008598	small nucleolar RNA R71	snoRNA	NA	NA	NA	NA	NA	NA
2.4966401497220705e-05	NC_044373.1	76528001	76529199	+	79.2153	1198	Intergenic	Intergenic	5868	LOC115713691	LOC115713691	XM_030642173	uncharacterized LOC115713691	protein_coding	NA	NA	NA	NA	NA	NA
1.2789884854376682e-10	NC_044374.1	20232001	20234199	+	79.2153	2198	Intergenic	Intergenic	-5826	LOC115717630	LOC115717630	XM_030646614	uncharacterized LOC115717630	protein_coding	-1.549169232	0.892939793	NA	0	1	NA
6.6055247722185965e-12	NC_044372.1	64356601	64359399	+	79.1921	2798	Intergenic	Intergenic	-14071	LOC115710142	LOC115710142	XM_030638480	synaptonemal complex protein 1,	protein_coding	0.57862626	1	1	0.391046793	1	1
2.0613416628749563e-08	NC_044374.1	31305001	31306399	+	79.1797	1398	Intergenic	Intergenic	151100	LOC115717703	LOC115717703	XM_030646683	hepatitis A virus cellular receptor 1-like	protein_coding	NA	NA	NA	NA	NA	NA
1.199533470691657e-06	NW_022060417.1	285401	286599	+	79.1668	1198	Intergenic	Intergenic	202764	LOC115702063	LOC115702063	XM_030629513	#N/A	protein_coding	NA	NA	NA	NA	NA	NA
7.382113036907163e-05-2	NC_044379.1	62982801	62983599	+	79.139	798	Intergenic	Intergenic	-20179	LOC115700399	LOC115700399	XM_030627957	GDSL esterase/lipase At5g03810-like	protein_coding	NA	NA	NA	NA	NA	NA
7.382113036907163e-05	NC_044378.1	49944801	49945399	+	79.139	598	Intergenic	Intergenic	33649	LOC115697922	LOC115697922	XM_030625095	wall-associated receptor kinase-like 1	protein_coding	NA	NA	NA	NA	NA	NA
5.9364227809557004e-08	NC_044374.1	86523401	86524599	+	79.139	1198	TTS	-TTS (LOC115718239)	646	LOC115718239	LOC115718239	XR_004011823	small nucleolar RNA R71	snoRNA	NA	NA	NA	NA	NA	NA
7.382113036907163e-05-3	NW_022060482.1	75201	75799	+	79.139	598	Intergenic	Intergenic	75330	LOC115702199	LOC115702199	XM_030629649	#N/A	protein_coding	NA	NA	NA	NA	NA	NA
2.6776024055825477e-15-2	NC_044370.1	49825801	49827399	+	79.1291	1598	Intergenic	Intergenic	-20775	LOC115721323	LOC115721323	XM_030650597	uncharacterized LOC115721323	protein_coding	2.6977427	0.551665726	1	2.27200243	0.647354272	1
2.6776024055825477e-15	NC_044370.1	49823801	49824999	+	79.1291	1198	Intergenic	Intergenic	-22975	LOC115721323	LOC115721323	XM_030650597	uncharacterized LOC115721323	protein_coding	2.6977427	0.551665726	1	2.27200243	0.647354272	1
2.9943130939913116e-09	NC_044373.1	43652801	43653799	+	79.1209	998	Intergenic	Intergenic	407307	LOC115713438	LOC115713438	XM_030641921	uncharacterized LOC115713438	protein_coding	0.374376113	1	NA	0.925217262	1	NA
7.469703326422963e-18-2	NC_044375.1	72498001	72501999	+	79.1141	3998	Intergenic	Intergenic	49023	LOC115718551	LOC115718551	XM_030647352	ankyrin repeat-containing protein ITN1-like,	protein_coding	NA	NA	NA	NA	NA	NA
7.469703326422963e-18	NC_044372.1	70844401	70848399	+	79.1141	3998	Intergenic	Intergenic	-72597	LOC115708858	LOC115708858	XM_030636875	uncharacterized LOC115708858	protein_coding	-0.566713965	1	1	-2.832541318	5.86116E-13	2.21798E-11
3.4938702110734087e-06-2	NC_044374.1	27118401	27119799	+	79.1082	1398	promoter-TSS	-promoter-TSS (LOC115715757)	-1356	LOC115715757	LOC115715757	XR_004011433	uncharacterized LOC115715757	lncRNA	NA	NA	NA	NA	NA	NA
3.4938702110734087e-06	NC_044372.1	23393201	23394199	+	79.1082	998	Intergenic	Intergenic	-12559	LOC115708907	LOC115708907	XR_004010104	uncharacterized LOC115708907	lncRNA	NA	NA	NA	NA	NA	NA
1.713671172725345e-07	NC_044370.1	68519801	68521199	+	79.0917	1398	Intergenic	Intergenic	90413	LOC115706750	LOC115706750	XR_004009636	uncharacterized LOC115706750	lncRNA	NA	NA	NA	NA	NA	NA
1.713671172725345e-07-2	NC_044371.1	11894001	11895199	+	79.0917	1198	Intergenic	Intergenic	-23790	LOC115706853	LOC115706853	XM_030634610	serine/threonine-protein kinase TOR-like	protein_coding	0.608897815	1	1	0.544028343	1	1
1.713671172725345e-07-3	NC_044378.1	51555001	51556199	+	79.0917	1198	Intergenic	Intergenic	60290	LOC115698221	LOC115698221	XR_004008075	uncharacterized LOC115698221	lncRNA	-1.549149048	0.892943704	NA	-2.460944311	0.714651244	NA
8.59239564648353e-09	NC_044370.1	101974801	101976199	+	79.0813	1398	Intergenic	Intergenic	-4500	LOC115700770	LOC115700770	XM_030628419	probable methyltransferase PMT28,	protein_coding	0.58840331	1	1	0.348478529	1	1
4.3732501495615865e-10	NW_022060476.1	906001	908399	+	79.0742	2398	Intergenic	Intergenic	175400	LOC115702188	LOC115702188	XM_030629636	#N/A	protein_coding	NA	NA	NA	NA	NA	NA
0.00022006556048028913-3	NC_044374.1	78558001	78558599	+	79.0362	598	Intergenic	Intergenic	-2892	LOC115716213	LOC115716213	XM_030644955	#N/A	protein_coding	-0.574018094	1	1	0.002227637	1	1
0.00022006556048028913-5	NC_044379.1	6535401	6535999	+	79.0362	598	Intergenic	Intergenic	67946	LOC115701573	LOC115701573	XR_004008577	uncharacterized LOC115701573,	lncRNA	-0.283270345	1	1	-0.198953885	1	1
0.00022006556048028913-4	NC_044375.1	44646201	44646799	+	79.0362	598	Intergenic	Intergenic	-63587	LOC115720120	LOC115720120	XM_030649281	uncharacterized LOC115720120	protein_coding	0.469670029	1	1	-0.219661927	1	1
0.00022006556048028913	NC_044373.1	81120001	81120599	+	79.0362	598	Intergenic	Intergenic	12944	LOC115714651	LOC115714651	XM_030643401	zinc finger homeobox protein 4	protein_coding	0.631582654	1	1	1.101567613	0.568205401	1
1.0221275717122098e-05	NC_044377.1	5003001	5003799	+	79.0362	798	Intergenic	Intergenic	8319	LOC115724686	LOC115724686	XM_030654025	(R)-mandelonitrile lyase 1	protein_coding	-0.035896016	1	1	-2.295147321	0.183785563	0.953981419
0.00022006556048028913-2	NC_044374.1	16368201	16368999	+	79.0362	798	Intergenic	Intergenic	-40414	LOC115718324	LOC115718324	XR_004011903	small nucleolar RNA R71	snoRNA	NA	NA	NA	NA	NA	NA
4.960403082500255e-07	NC_044370.1	56686601	56687799	+	79.0362	1198	promoter-TSS	-promoter-TSS (LOC115703456)	-432	LOC115703456	LOC115703456	XR_004009218	small nucleolar RNA R71	snoRNA	NA	NA	NA	NA	NA	NA
0.00022006556048028913-6	NC_044379.1	9999401	9999999	+	79.0362	598	Intergenic	Intergenic	-46431	LOC115699817	LOC115699817	XM_030627360	uncharacterized LOC115699817	protein_coding	NA	NA	NA	NA	NA	NA
2.568171656424667e-14	NC_044373.1	32985201	32988599	+	79.0112	3398	Intergenic	Intergenic	38762	LOC115714859	LOC115714859	XR_004011135	uncharacterized LOC115714859	lncRNA	NA	NA	NA	NA	NA	NA
9.447149056525265e-12	NC_044371.1	30303401	30305999	+	79.0046	2598	Intergenic	Intergenic	-16457	LOC115708452	LOC115708452	XR_004009951	small nucleolar RNA R71	snoRNA	NA	NA	NA	NA	NA	NA
3.5857779973201244e-09	NC_044370.1	49243801	49245399	+	78.9935	1598	Intergenic	Intergenic	13873	LOC115721206	LOC115721206	XM_030650468	uncharacterized LOC115721206	protein_coding	NA	NA	NA	NA	NA	NA
2.0137330301515341e-16	NW_022060487.1	287201	290799	+	78.9935	3598	NA	NA	NA	NA			#N/A		NA	NA	NA	NA	NA	NA
7.116870561122516e-08	NC_044372.1	55417201	55418599	+	78.9843	1398	Intergenic	Intergenic	74783	LOC115711885	LOC115711885	XR_004010751	small nucleolar RNA R71	snoRNA	NA	NA	NA	NA	NA	NA
7.116870561122516e-08-2	NC_044374.1	85427001	85428399	+	78.9843	1398	Intergenic	Intergenic	-149596	LOC115716182	LOC115716182	XM_030644921	uncharacterized LOC115716182	protein_coding	2.148277376	0.003082854	0.022120827	0.135857219	1	1
5.696409866765433e-16	NC_044375.1	46104001	46107399	+	78.9701	3398	Intergenic	Intergenic	90838	LOC115720127	LOC115720127	XM_030649288	uncharacterized LOC115720127	protein_coding	NA	NA	NA	NA	NA	NA
1.44043098811496e-06	NC_044377.1	41314201	41315599	+	78.9701	1398	Intergenic	Intergenic	-140460	LOC115696056	LOC115696056	XR_004007654	small nucleolar RNA R71	snoRNA	NA	NA	NA	NA	NA	NA
1.44043098811496e-06-2	NC_044377.1	56639401	56640599	+	78.9701	1198	Intergenic	Intergenic	-42773	LOC115695290	LOC115695290	XM_030622364	L10-interacting MYB domain-containing protein-like	protein_coding	NA	NA	NA	NA	NA	NA
3.0062696352294767e-05-2	NC_044378.1	30282801	30283599	+	78.9452	798	intron	-intron (LOC115696854, intron 2 of 2)	2263	LOC115696854	LOC115696854	XR_004007791	uncharacterized LOC115696854,	lncRNA	1.0798676	0.769760613	1	0.693455536	1	1
3.0062696352294767e-05	NC_044371.1	82316201	82316999	+	78.9452	798	Intergenic	Intergenic	-12313	LOC115704429	LOC115704429	XM_030631635	uncharacterized LOC115704429	protein_coding	-2.428114121	0.723676179	NA	-0.998312758	1	NA
2.0553711170089737e-07-2	NC_044376.1	34655001	34656199	+	78.9241	1198	Intergenic	Intergenic	23123	LOC115723276	LOC115723276	XM_030652719	DNA-directed RNA polymerase III subunit rpc9	protein_coding	-0.332072395	1	1	0.25568799	1	1
2.0553711170089737e-07	NC_044373.1	21844401	21845799	+	78.9241	1398	Intergenic	Intergenic	-13322	LOC115714166	LOC115714166	XM_030642735	protein trichome birefringence-like 5	protein_coding	0.340064862	1	1	0.126291244	1	1
2.0553711170089737e-07-3	NC_044377.1	26017601	26018799	+	78.9241	1198	Intergenic	Intergenic	-11784	LOC115695066	LOC115695066	XM_030622161	uncharacterized mitochondrial protein AtMg00310-like	protein_coding	NA	NA	NA	NA	NA	NA
1.1297139678935837e-11	NC_044370.1	38230201	38232999	+	78.9094	2798	Intergenic	Intergenic	-15841	LOC115710594	LOC115710594	XM_030638955	#N/A	protein_coding	-1.123621975	0.724688754	1	-0.482413937	1	1
4.19863646944702e-06-2	NC_044371.1	81403201	81404599	+	78.8902	1398	Intergenic	Intergenic	53838	LOC115707414	LOC115707414	XM_030635371	stemmadenine O-acetyltransferase	protein_coding	2.216349142	0.059525865	0.287431724	-0.135970142	1	1
4.19863646944702e-06-3	NC_044374.1	23488601	23489599	+	78.8902	998	Intergenic	Intergenic	29329	LOC115717364	LOC115717364	XM_030646332	dehydration-responsive element-binding protein 1E-like	protein_coding	-1.627227466	0.338313853	1	-2.631081514	0.009905093	0.082465459
2.960147408371283e-08	NC_044370.1	21860401	21861799	+	78.8902	1398	Intergenic	Intergenic	-14358	LOC115706519	LOC115706519	XR_004009598	uncharacterized LOC115706519	lncRNA	NA	NA	NA	NA	NA	NA
4.19863646944702e-06	NC_044370.1	48379201	48380399	+	78.8902	1198	Intergenic	Intergenic	31782	LOC115702491	LOC115702491	XR_004008894	uncharacterized LOC115702491,	lncRNA	0	1	NA	-0.998328082	1	NA
4.293870976108171e-09-2	NW_022060528.1	379401	382199	+	78.8642	2798	Intergenic	Intergenic	-37850	LOC115702299	LOC115702299	XM_030629747	#N/A	protein_coding	3.585207236	0.004560693	0.031378023	1.915316483	0.281334061	1
4.293870976108171e-09	NC_044373.1	31114601	31116399	+	78.8642	1798	Intergenic	Intergenic	26574	LOC115713327	LOC115713327	XM_030641807	uncharacterized mitochondrial protein AtMg00810-like	protein_coding	NA	NA	NA	NA	NA	NA
5.952652548622249e-07	NC_044379.1	4397801	4398799	+	78.8534	998	Intergenic	Intergenic	-13454	LOC115699025	LOC115699025	XM_030626235	zinc finger CCCH domain-containing protein 48	protein_coding	0.719978525	1	1	0.111458957	1	1
8.531663616843945e-08-2	NC_044373.1	59770601	59772599	+	78.8269	1998	Intergenic	Intergenic	35774	LOC115713545	LOC115713545	XM_030642029	uncharacterized LOC115713545	protein_coding	NA	NA	NA	NA	NA	NA
8.901312650041822e-05-3	NC_044375.1	80726601	80727399	+	78.8269	798	Intergenic	Intergenic	15971	LOC115719096	LOC115719096	XR_004012125	uncharacterized LOC115719096	lncRNA	0	1	NA	-0.998328082	1	NA
[truncated: 15,975 more rows]

## Sheet: Stem_annotate_H3K27me3
P-value	Chr	Start	End	Strand	Peak Score	Focus Ratio/Region Size	Annotation	Detailed Annotation	Distance to TSS	Nearest PromoterID	Entrez ID	Nearest Unigene	Nearest Gene Description	Gene Type	Stem vs. Leaf log2FC	Stem vs. Leaf p-value	Stem vs. Leaf p-adj(FDR)	Stem vs. Trichome log2FC	Stem vs. Trichome p-value	Stem vs. Trichome p-adj(FDR)
[truncated: 11,060 more rows]

[truncated: 4 more sheets: Stem_annotate_H3K56ac, Stem_annotate_H3K4me3, Barplot, Cs10_genes]
