# Supplementary material for: Characterization of the Cannabis sativa glandular trichome epigenome
Source: bioRxiv preprint, doi:10.1101/2024.07.04.602151, version 1 (2024-07-08)
Supplement: Additional File 5 [file 602151_file06.xlsx]

## Sheet: Read_Me
This document contains the results of gene ontology enrichment of biological processes (BP), molecular functions (MF), and cellular compartment (CC) of the genes found to intersect with each histone modification, in glandular trichome tissue. Each tabe either BP, MF, or CC contains ontology data for each histone modification, namely H3K4me3, H3K56ac, H3K27me3, and H2A.Z

## Sheet: GO_BP_Trichome_Histone_genes
	Histone Modifcation / Variant	ID	Description	GeneRatio	BgRatio	pvalue	p.adjust	qvalue	geneID	Count
1	H3K4me3	GO:0016071	mRNA metabolic process	425/11786	465/15562	7.46e-19	1.67e-15	1.17e-15	LOC115702597/LOC115702599/LOC115702617/LOC115704488/LOC115702736/LOC115702792/LOC115702901/LOC115702907/LOC115703169/LOC115703195/LOC115703235/LOC115703251/LOC115715318/LOC115696485/LOC115694915/LOC115697784/LOC115696283/LOC115696655/LOC115695062/LOC115697868/LOC115696009/LOC115716552/LOC115702657/LOC115703071/LOC115703147/LOC115703190/LOC115703796/LOC115704249/LOC115705321/LOC115706269/LOC115707…	425
2	H3K4me3	GO:0022613	ribonucleoprotein complex biogenesis	435/11786	479/15562	6.51e-18	7.28e-15	5.11e-15	LOC115702599/LOC115702649/LOC115702861/LOC115702948/LOC115702975/LOC115703055/LOC115714780/LOC115703081/LOC115722899/LOC115702434/LOC115710511/LOC115720436/LOC115697784/LOC115697311/LOC115697868/LOC115697394/LOC115699881/LOC115702657/LOC115703071/LOC115703138/LOC115703656/LOC115703796/LOC115704514/LOC115705361/LOC115705729/LOC115708919/LOC115711190/LOC115712334/LOC115713809/LOC115713831/LOC115714…	435
3	H3K4me3	GO:0006397	mRNA processing	314/11786	339/15562	1.83e-16	1.36e-13	9.58e-14	LOC115702597/LOC115702599/LOC115702617/LOC115704488/LOC115702792/LOC115702901/LOC115702907/LOC115703169/LOC115703235/LOC115703251/LOC115715318/LOC115696485/LOC115694915/LOC115697784/LOC115696283/LOC115696655/LOC115695062/LOC115697868/LOC115696009/LOC115716552/LOC115702657/LOC115703147/LOC115703190/LOC115703796/LOC115705321/LOC115706269/LOC115707629/LOC115707638/LOC115707661/LOC115709368/LOC115709…	314
4	H3K4me3	GO:0034470	ncRNA processing	408/11786	452/15562	9.84e-16	5.5e-13	3.86e-13	LOC115702649/LOC115702831/LOC115702861/LOC115702948/LOC115702975/LOC115703055/LOC115714780/LOC115703081/LOC115703235/LOC115722899/LOC115702434/LOC115710511/LOC115720436/LOC115699881/LOC115701640/LOC115703071/LOC115703138/LOC115703284/LOC115703656/LOC115703913/LOC115704391/LOC115704514/LOC115705361/LOC115707493/LOC115710828/LOC115711190/LOC115712383/LOC115714532/LOC115722758/LOC115697453/LOC115695…	408
5	H3K4me3	GO:0006325	chromatin organization	366/11786	404/15562	7.63e-15	3.41e-12	2.39e-12	LOC115702592/LOC115704488/LOC115702752/LOC115702766/LOC115702813/LOC115724257/LOC115702872/LOC115703017/LOC115703044/LOC115703046/LOC115703105/LOC115703107/LOC115703121/LOC115703141/LOC115703251/LOC115707433/LOC115707931/LOC115716590/LOC115702759/LOC115702778/LOC115704038/LOC115704391/LOC115704855/LOC115706453/LOC115707169/LOC115708212/LOC115709095/LOC115709107/LOC115711075/LOC115711086/LOC115711…	366
6	H3K4me3	GO:0008380	RNA splicing	259/11786	279/15562	4.01e-14	1.49e-11	1.05e-11	LOC115702597/LOC115702599/LOC115702792/LOC115703169/LOC115703195/LOC115703235/LOC115709856/LOC115703251/LOC115699128/LOC115715318/LOC115696485/LOC115694915/LOC115697784/LOC115696283/LOC115696655/LOC115695062/LOC115697868/LOC115696009/LOC115699266/LOC115716552/LOC115702657/LOC115703061/LOC115703796/LOC115705321/LOC115705793/LOC115707629/LOC115709368/LOC115709604/LOC115710094/LOC115710639/LOC115712…	259
7	H3K4me3	GO:0016567	protein ubiquitination	373/11786	416/15562	2.11e-13	6.63e-11	4.65e-11	LOC115702654/LOC115702698/LOC115702702/LOC115702708/LOC115702720/LOC115702909/LOC115702941/LOC115703038/LOC115703056/LOC115703086/LOC115703087/LOC115702417/LOC115703165/LOC115705299/LOC115715318/LOC115721901/LOC115723387/LOC115695922/LOC115695332/LOC115695661/LOC115695831/LOC115695269/LOC115695743/LOC115702657/LOC115703223/LOC115704772/LOC115704874/LOC115706269/LOC115706299/LOC115707344/LOC115708…	373
8	H3K4me3	GO:0032446	protein modification by small protein conjugation	392/11786	439/15562	2.37e-13	6.63e-11	4.65e-11	LOC115702654/LOC115702698/LOC115702702/LOC115702708/LOC115702720/LOC115702909/LOC115702941/LOC115703038/LOC115703056/LOC115703086/LOC115703087/LOC115702417/LOC115703165/LOC115705299/LOC115715318/LOC115721901/LOC115723387/LOC115695922/LOC115695332/LOC115695661/LOC115695831/LOC115695269/LOC115695743/LOC115702657/LOC115703223/LOC115704772/LOC115704874/LOC115706269/LOC115706299/LOC115707344/LOC115708…	392
9	H3K4me3	GO:0042254	ribosome biogenesis	351/11786	390/15562	2.99e-13	7.44e-11	5.22e-11	LOC115702649/LOC115702861/LOC115702948/LOC115702975/LOC115703055/LOC115714780/LOC115703081/LOC115722899/LOC115702434/LOC115710511/LOC115720436/LOC115697311/LOC115697394/LOC115699881/LOC115703071/LOC115703138/LOC115703656/LOC115704514/LOC115705361/LOC115705729/LOC115708919/LOC115711190/LOC115712334/LOC115714532/LOC115722758/LOC115697453/LOC115695309/LOC115698624/LOC115699461/LOC115699576/LOC115700…	351
10	H3K4me3	GO:0030163	protein catabolic process	385/11786	432/15562	7.83e-13	1.75e-10	1.23e-10	LOC115702658/LOC115702663/LOC115702720/LOC115702726/LOC115702752/LOC115702915/LOC115702794/LOC115702908/LOC115702961/LOC115702981/LOC115703038/LOC115703056/LOC115714780/LOC115703086/LOC115703087/LOC115703144/LOC115703159/LOC115703165/LOC115707753/LOC115720495/LOC115721223/LOC115721901/LOC115723387/LOC115700096/LOC115702664/LOC115702843/LOC115703721/LOC115703805/LOC115706219/LOC115707344/LOC115707…	385
11	H3K4me3	GO:0016072	rRNA metabolic process	263/11786	289/15562	1.4e-11	2.84e-09	1.99e-09	LOC115702649/LOC115701559/LOC115702795/LOC115702809/LOC115702861/LOC115702948/LOC115702975/LOC115703055/LOC115714780/LOC115703081/LOC115722899/LOC115702434/LOC115710511/LOC115720436/LOC115699881/LOC115703061/LOC115703071/LOC115703138/LOC115703656/LOC115704514/LOC115705361/LOC115711190/LOC115714532/LOC115722758/LOC115697453/LOC115695309/LOC115698624/LOC115699461/LOC115699576/LOC115705135/LOC115704…	263
12	H3K4me3	GO:0051603	proteolysis involved in protein catabolic process	360/11786	406/15562	2.28e-11	4.07e-09	2.86e-09	LOC115702658/LOC115702663/LOC115702720/LOC115702726/LOC115702752/LOC115702915/LOC115702794/LOC115702908/LOC115702961/LOC115702981/LOC115703038/LOC115703056/LOC115714780/LOC115703086/LOC115703087/LOC115703144/LOC115703159/LOC115703165/LOC115707753/LOC115720495/LOC115721901/LOC115723387/LOC115700096/LOC115702664/LOC115702843/LOC115703721/LOC115703805/LOC115706219/LOC115707344/LOC115707386/LOC115709…	360
13	H3K4me3	GO:1901137	carbohydrate derivative biosynthetic process	355/11786	400/15562	2.37e-11	4.07e-09	2.86e-09	LOC115702850/LOC115702863/LOC115702925/LOC115702932/LOC115724952/LOC115695222/LOC115699192/LOC115702965/LOC115704378/LOC115704957/LOC115705475/LOC115705498/LOC115705607/LOC115707000/LOC115707728/LOC115708064/LOC115708073/LOC115708276/LOC115709068/LOC115709580/LOC115709698/LOC115709948/LOC115710101/LOC115710480/LOC115710680/LOC115710877/LOC115710905/LOC115710919/LOC115712548/LOC115713640/LOC115698…	355
14	H3K4me3	GO:0000375	RNA splicing, via transesterification reactions	204/11786	220/15562	2.91e-11	4.33e-09	3.04e-09	LOC115702599/LOC115702792/LOC115703169/LOC115703235/LOC115703251/LOC115715318/LOC115696485/LOC115694915/LOC115697784/LOC115696283/LOC115696655/LOC115695062/LOC115697868/LOC115696009/LOC115716552/LOC115702657/LOC115703796/LOC115707629/LOC115709368/LOC115709604/LOC115712402/LOC115713809/LOC115713831/LOC115714080/LOC115696486/LOC115698158/LOC115700176/LOC115705445/LOC115705446/LOC115705432/LOC115706…	204
15	H3K4me3	GO:0000377	RNA splicing, via transesterification reactions with bulged adenosine as nucleophile	204/11786	220/15562	2.91e-11	4.33e-09	3.04e-09	LOC115702599/LOC115702792/LOC115703169/LOC115703235/LOC115703251/LOC115715318/LOC115696485/LOC115694915/LOC115697784/LOC115696283/LOC115696655/LOC115695062/LOC115697868/LOC115696009/LOC115716552/LOC115702657/LOC115703796/LOC115707629/LOC115709368/LOC115709604/LOC115712402/LOC115713809/LOC115713831/LOC115714080/LOC115696486/LOC115698158/LOC115700176/LOC115705445/LOC115705446/LOC115705432/LOC115706…	204
16	H3K4me3	GO:0019941	modification-dependent protein catabolic process	307/11786	343/15562	4.97e-11	6.95e-09	4.88e-09	LOC115702658/LOC115702663/LOC115702720/LOC115702752/LOC115702794/LOC115702908/LOC115703038/LOC115703056/LOC115703086/LOC115703087/LOC115703159/LOC115703165/LOC115720495/LOC115721901/LOC115723387/LOC115700096/LOC115702664/LOC115702843/LOC115703721/LOC115703805/LOC115706219/LOC115707344/LOC115707386/LOC115709753/LOC115709802/LOC115709948/LOC115710949/LOC115711205/LOC115714059/LOC115717510/LOC115720…	307
17	H3K4me3	GO:0043632	modification-dependent macromolecule catabolic process	316/11786	354/15562	5.72e-11	7.52e-09	5.27e-09	LOC115702658/LOC115702663/LOC115702720/LOC115702752/LOC115702794/LOC115702908/LOC115703038/LOC115703056/LOC115703086/LOC115703087/LOC115703159/LOC115703165/LOC115720495/LOC115721901/LOC115723387/LOC115700096/LOC115702664/LOC115702843/LOC115703071/LOC115703721/LOC115703805/LOC115706219/LOC115707344/LOC115707386/LOC115709753/LOC115709802/LOC115709948/LOC115710949/LOC115711205/LOC115714059/LOC115717…	316
18	H3K4me3	GO:0051726	regulation of cell cycle	222/11786	242/15562	7.37e-11	9.15e-09	6.42e-09	LOC115702619/LOC115702671/LOC115702732/LOC115702697/LOC115702964/LOC115703082/LOC115703195/LOC115719849/LOC115723901/LOC115702797/LOC115702647/LOC115703080/LOC115703688/LOC115705372/LOC115708347/LOC115710061/LOC115711061/LOC115711182/LOC115713754/LOC115713814/LOC115722563/LOC115699101/LOC115699147/LOC115699428/LOC115699648/LOC115699911/LOC115700312/LOC115700579/LOC115701015/LOC115701871/LOC115702…	222
19	H3K4me3	GO:0000398	mRNA splicing, via spliceosome	186/11786	200/15562	1.08e-10	1.27e-08	8.89e-09	LOC115702599/LOC115702792/LOC115703169/LOC115703235/LOC115703251/LOC115715318/LOC115696485/LOC115694915/LOC115697784/LOC115696283/LOC115696655/LOC115695062/LOC115697868/LOC115696009/LOC115716552/LOC115702657/LOC115703796/LOC115707629/LOC115709368/LOC115709604/LOC115712402/LOC115713809/LOC115713831/LOC115714080/LOC115696486/LOC115698158/LOC115700176/LOC115705445/LOC115705446/LOC115705432/LOC115706…	186
20	H3K4me3	GO:0006511	ubiquitin-dependent protein catabolic process	297/11786	332/15562	1.2e-10	1.34e-08	9.37e-09	LOC115702658/LOC115702663/LOC115702752/LOC115702794/LOC115702908/LOC115703038/LOC115703056/LOC115703086/LOC115703087/LOC115703159/LOC115703165/LOC115720495/LOC115721901/LOC115723387/LOC115700096/LOC115702664/LOC115702843/LOC115703721/LOC115703805/LOC115706219/LOC115707344/LOC115707386/LOC115709753/LOC115709802/LOC115709948/LOC115710949/LOC115711205/LOC115714059/LOC115717510/LOC115720532/LOC115721…	297
21	H3K4me3	GO:0048285	organelle fission	179/11786	192/15562	1.35e-10	1.43e-08	1.01e-08	LOC115702602/LOC115702618/LOC115702630/LOC115703137/LOC115703082/LOC115703121/LOC115703167/LOC115703174/LOC115720388/LOC115703420/LOC115706195/LOC115707638/LOC115707661/LOC115709986/LOC115710860/LOC115699147/LOC115699159/LOC115699428/LOC115703173/LOC115705836/LOC115706048/LOC115706561/LOC115708278/LOC115705997/LOC115706060/LOC115707046/LOC115708215/LOC115706772/LOC115707955/LOC115706082/LOC115706…	179
22	H3K4me3	GO:0009451	RNA modification	296/11786	331/15562	1.42e-10	1.44e-08	1.01e-08	LOC115702770/LOC115702852/LOC115702876/LOC115702907/LOC115702918/LOC115702975/LOC115703055/LOC115703081/LOC115698022/LOC115703373/LOC115702434/LOC115705920/LOC115724587/LOC115724952/LOC115700804/LOC115701640/LOC115703284/LOC115703913/LOC115704514/LOC115705321/LOC115705331/LOC115707621/LOC115707700/LOC115707823/LOC115709536/LOC115709897/LOC115710480/LOC115710507/LOC115710616/LOC115710828/LOC115712…	296
23	H3K4me3	GO:0090407	organophosphate biosynthetic process	333/11786	376/15562	1.84e-10	1.79e-08	1.25e-08	LOC115702611/LOC115702850/LOC115708996/LOC115703150/LOC115703157/LOC115703163/LOC115709998/LOC115722977/LOC115724952/LOC115696485/LOC115694915/LOC115698051/LOC115696655/LOC115695062/LOC115702965/LOC115702987/LOC115704378/LOC115704957/LOC115705104/LOC115705607/LOC115706017/LOC115708064/LOC115708073/LOC115708276/LOC115709308/LOC115709638/LOC115709698/LOC115710101/LOC115710352/LOC115710480/LOC115710…	333
24	H3K4me3	GO:0006364	rRNA processing	248/11786	274/15562	2.29e-10	2.13e-08	1.5e-08	LOC115702649/LOC115702861/LOC115702948/LOC115702975/LOC115703055/LOC115714780/LOC115703081/LOC115722899/LOC115702434/LOC115710511/LOC115720436/LOC115699881/LOC115703071/LOC115703138/LOC115703656/LOC115704514/LOC115705361/LOC115711190/LOC115714532/LOC115722758/LOC115697453/LOC115695309/LOC115698624/LOC115699461/LOC115699576/LOC115705135/LOC115704898/LOC115706782/LOC115707790/LOC115708179/LOC115706…	248
25	H3K4me3	GO:0051321	meiotic cell cycle	141/11786	149/15562	6.01e-10	5.38e-08	3.77e-08	LOC115702602/LOC115702618/LOC115702630/LOC115703137/LOC115703110/LOC115703121/LOC115703140/LOC115703167/LOC115705387/LOC115720388/LOC115699804/LOC115703420/LOC115708347/LOC115709473/LOC115709986/LOC115699159/LOC115699428/LOC115699845/LOC115705836/LOC115705470/LOC115703720/LOC115706132/LOC115706800/LOC115707516/LOC115707602/LOC115704793/LOC115704754/LOC115704365/LOC115704458/LOC115704245/LOC115704…	141
26	H3K4me3	GO:0022402	cell cycle process	355/11786	405/15562	9.58e-10	8.23e-08	5.78e-08	LOC115702602/LOC115702619/LOC115702618/LOC115702630/LOC115702671/LOC115702711/LOC115702732/LOC115702734/LOC115702733/LOC115702818/LOC115702834/LOC115702907/LOC115702697/LOC115703137/LOC115702964/LOC115703082/LOC115703110/LOC115703121/LOC115703140/LOC115703167/LOC115703195/LOC115703222/LOC115704043/LOC115705387/LOC115705574/LOC115719849/LOC115720388/LOC115723901/LOC115702797/LOC115699804/LOC115702…	355
27	H3K4me3	GO:0006886	intracellular protein transport	431/11786	499/15562	1.65e-09	1.37e-07	9.61e-08	LOC115702642/LOC115702675/LOC115702808/LOC115702816/LOC115702879/LOC115702892/LOC115702923/LOC115703009/LOC115703021/LOC115703086/LOC115703087/LOC115704956/LOC115710575/LOC115713633/LOC115713739/LOC115723066/LOC115699346/LOC115700804/LOC115702343/LOC115702605/LOC115703223/LOC115705296/LOC115705833/LOC115706299/LOC115707682/LOC115708514/LOC115708202/LOC115708838/LOC115710763/LOC115711387/LOC115712…	431
28	H3K4me3	GO:0006520	cellular amino acid metabolic process	369/11786	423/15562	1.76e-09	1.41e-07	9.87e-08	LOC115702620/LOC115702618/LOC115702629/LOC115702630/LOC115702672/LOC115702839/LOC115702840/LOC115702853/LOC115702854/LOC115702859/LOC115702934/LOC115702935/LOC115702968/LOC115702983/LOC115702972/LOC115703006/LOC115703014/LOC115703195/LOC115703222/LOC115703228/LOC115721396/LOC115712436/LOC115713573/LOC115715228/LOC115718543/LOC115701640/LOC115703995/LOC115704012/LOC115704142/LOC115706017/LOC115706…	369
29	H3K4me3	GO:0010629	negative regulation of gene expression	325/11786	370/15562	2.87e-09	2.16e-07	1.52e-07	LOC115702592/LOC115704488/LOC115702736/LOC115702813/LOC115724257/LOC115703078/LOC115703195/LOC115703251/LOC115707433/LOC115716590/LOC115720249/LOC115696485/LOC115694915/LOC115697784/LOC115695332/LOC115696655/LOC115695062/LOC115697868/LOC115695269/LOC115702759/LOC115702778/LOC115702835/LOC115703071/LOC115703796/LOC115704745/LOC115704249/LOC115704391/LOC115706453/LOC115709095/LOC115709368/LOC115710…	325
30	H3K4me3	GO:0033365	protein localization to organelle	239/11786	266/15562	2.9e-09	2.16e-07	1.52e-07	LOC115702727/LOC115702737/LOC115702734/LOC115702733/LOC115702753/LOC115702754/LOC115702808/LOC115702879/LOC115702892/LOC115702923/LOC115703009/LOC115703086/LOC115703087/LOC115723066/LOC115699346/LOC115700804/LOC115702343/LOC115703223/LOC115704352/LOC115704344/LOC115705296/LOC115706299/LOC115707682/LOC115708514/LOC115702407/LOC115711387/LOC115712334/LOC115713121/LOC115697285/LOC115698324/LOC115700…	239
31	H3K4me3	GO:0000280	nuclear division	139/11786	148/15562	3.9e-09	2.81e-07	1.97e-07	LOC115702602/LOC115702618/LOC115702630/LOC115703137/LOC115703082/LOC115703121/LOC115703167/LOC115720388/LOC115703420/LOC115709986/LOC115699147/LOC115699159/LOC115699428/LOC115705836/LOC115705997/LOC115706060/LOC115707046/LOC115708215/LOC115706772/LOC115707955/LOC115706082/LOC115706132/LOC115706800/LOC115707516/LOC115707602/LOC115704793/LOC115704754/LOC115704365/LOC115704458/LOC115704245/LOC115704…	139
32	H3K4me3	GO:0071826	ribonucleoprotein complex subunit organization	159/11786	172/15562	8.69e-09	6.07e-07	4.26e-07	LOC115702599/LOC115710511/LOC115697784/LOC115697868/LOC115702657/LOC115703796/LOC115708919/LOC115713809/LOC115713831/LOC115697809/LOC115698158/LOC115698624/LOC115705545/LOC115708353/LOC115708213/LOC115706049/LOC115707087/LOC115704987/LOC115703859/LOC115707767/LOC115705126/LOC115706118/LOC115705011/LOC115705219/LOC115705197/LOC115706595/LOC115707731/LOC115703901/LOC115707422/LOC115707381/LOC115708…	159
33	H3K4me3	GO:0022618	ribonucleoprotein complex assembly	158/11786	171/15562	1.07e-08	7.21e-07	5.06e-07	LOC115702599/LOC115710511/LOC115697784/LOC115697868/LOC115702657/LOC115703796/LOC115708919/LOC115713809/LOC115713831/LOC115697809/LOC115698158/LOC115698624/LOC115705545/LOC115708353/LOC115708213/LOC115706049/LOC115707087/LOC115704987/LOC115703859/LOC115707767/LOC115705126/LOC115706118/LOC115705011/LOC115705219/LOC115705197/LOC115706595/LOC115707731/LOC115703901/LOC115707422/LOC115707381/LOC115708…	158
34	H3K4me3	GO:0007059	chromosome segregation	108/11786	113/15562	1.16e-08	7.6e-07	5.34e-07	LOC115703082/LOC115703121/LOC115703167/LOC115720388/LOC115707719/LOC115709986/LOC115713311/LOC115699147/LOC115699159/LOC115706157/LOC115706037/LOC115705997/LOC115706060/LOC115708215/LOC115706772/LOC115707955/LOC115706082/LOC115706800/LOC115707602/LOC115704754/LOC115704365/LOC115704349/LOC115706429/LOC115705680/LOC115705795/LOC115705841/LOC115708236/LOC115706010/LOC115706016/LOC115706373/LOC115703…	108
35	H3K4me3	GO:0098813	nuclear chromosome segregation	99/11786	103/15562	1.81e-08	1.16e-06	8.13e-07	LOC115703082/LOC115703121/LOC115703167/LOC115720388/LOC115709986/LOC115713311/LOC115699147/LOC115699159/LOC115706157/LOC115706037/LOC115705997/LOC115706060/LOC115708215/LOC115706772/LOC115707955/LOC115706082/LOC115706800/LOC115707602/LOC115704754/LOC115704365/LOC115704349/LOC115706429/LOC115705680/LOC115705795/LOC115708236/LOC115706010/LOC115706016/LOC115703644/LOC115704718/LOC115706898/LOC115707…	99
36	H3K4me3	GO:0140013	meiotic nuclear division	91/11786	94/15562	2.06e-08	1.28e-06	8.97e-07	LOC115702602/LOC115702618/LOC115702630/LOC115703137/LOC115703121/LOC115703167/LOC115720388/LOC115703420/LOC115709986/LOC115699159/LOC115699428/LOC115705836/LOC115706132/LOC115706800/LOC115707516/LOC115707602/LOC115704793/LOC115704754/LOC115704365/LOC115704458/LOC115704245/LOC115704735/LOC115707892/LOC115705602/LOC115705665/LOC115706429/LOC115705680/LOC115705670/LOC115706380/LOC115705795/LOC115708…	91
37	H3K4me3	GO:0055086	nucleobase-containing small molecule metabolic process	332/11786	382/15562	2.91e-08	1.76e-06	1.23e-06	LOC115702783/LOC115702801/LOC115702836/LOC115702850/LOC115702934/LOC115703114/LOC115703131/LOC115703157/LOC115703193/LOC115709998/LOC115722977/LOC115724952/LOC115699192/LOC115702987/LOC115703913/LOC115704327/LOC115704378/LOC115704957/LOC115705607/LOC115708064/LOC115708073/LOC115709638/LOC115709698/LOC115710101/LOC115710480/LOC115710877/LOC115710919/LOC115711259/LOC115711637/LOC115711722/LOC115712…	332
38	H3K4me3	GO:0010498	proteasomal protein catabolic process	193/11786	214/15562	4.77e-08	2.81e-06	1.97e-06	LOC115702658/LOC115702663/LOC115702752/LOC115702794/LOC115703159/LOC115703165/LOC115720495/LOC115721901/LOC115700096/LOC115702843/LOC115703805/LOC115706219/LOC115709753/LOC115709802/LOC115709948/LOC115711205/LOC115714059/LOC115720532/LOC115721654/LOC115723577/LOC115725385/LOC115697670/LOC115697677/LOC115699147/LOC115700255/LOC115700278/LOC115700360/LOC115701025/LOC115701199/LOC115702317/LOC115708…	193
39	H3K4me3	GO:0071824	protein-DNA complex subunit organization	107/11786	113/15562	6.95e-08	3.99e-06	2.8e-06	LOC115703105/LOC115703107/LOC115703141/LOC115705574/LOC115705372/LOC115697659/LOC115700075/LOC115701199/LOC115703693/LOC115707202/LOC115706762/LOC115706763/LOC115705161/LOC115707578/LOC115705214/LOC115705230/LOC115704793/LOC115704735/LOC115705795/LOC115706196/LOC115708283/LOC115707024/LOC115703595/LOC115707069/LOC115707206/LOC115707276/LOC115707402/LOC115707539/LOC115705259/LOC115709260/LOC115709…	107
40	H3K4me3	GO:1903046	meiotic cell cycle process	119/11786	127/15562	7.97e-08	4.46e-06	3.13e-06	LOC115702602/LOC115702618/LOC115702630/LOC115703137/LOC115703110/LOC115703121/LOC115703140/LOC115703167/LOC115705387/LOC115720388/LOC115703420/LOC115709473/LOC115709986/LOC115699159/LOC115699428/LOC115705836/LOC115705470/LOC115703720/LOC115706132/LOC115706800/LOC115707516/LOC115707602/LOC115704793/LOC115704754/LOC115704365/LOC115704458/LOC115704245/LOC115704735/LOC115707892/LOC115705602/LOC115704…	119
41	H3K4me3	GO:0006457	protein folding	181/11786	201/15562	1.65e-07	9.02e-06	6.33e-06	LOC115702879/LOC115702892/LOC115703243/LOC115704221/LOC115715228/LOC115717462/LOC115697104/LOC115704638/LOC115705122/LOC115705652/LOC115706704/LOC115706888/LOC115707344/LOC115707744/LOC115707973/LOC115708359/LOC115708431/LOC115710524/LOC115710542/LOC115710712/LOC115712085/LOC115712367/LOC115722410/LOC115713121/LOC115697350/LOC115703015/LOC115702317/LOC115703671/LOC115705067/LOC115707449/LOC115706…	181
42	H3K4me3	GO:1901605	alpha-amino acid metabolic process	252/11786	287/15562	1.88e-07	9.96e-06	6.99e-06	LOC115702620/LOC115702618/LOC115702629/LOC115702630/LOC115702859/LOC115702934/LOC115702935/LOC115702968/LOC115702983/LOC115702972/LOC115703006/LOC115703014/LOC115703195/LOC115703222/LOC115703228/LOC115713573/LOC115715228/LOC115718543/LOC115703995/LOC115704012/LOC115704142/LOC115706017/LOC115706057/LOC115706428/LOC115707082/LOC115708026/LOC115708064/LOC115708896/LOC115710665/LOC115710723/LOC115711…	252
43	H3K4me3	GO:0072594	establishment of protein localization to organelle	200/11786	224/15562	1.92e-07	9.96e-06	6.99e-06	LOC115702808/LOC115702879/LOC115702892/LOC115702923/LOC115703009/LOC115703086/LOC115703087/LOC115723066/LOC115699346/LOC115700804/LOC115702343/LOC115703223/LOC115705296/LOC115706299/LOC115707682/LOC115708514/LOC115711387/LOC115712334/LOC115713121/LOC115697285/LOC115702317/LOC115705543/LOC115708339/LOC115708225/LOC115705089/LOC115706482/LOC115705580/LOC115705549/LOC115708272/LOC115708161/LOC115706…	200
44	H3K4me3	GO:0016570	histone modification	185/11786	207/15562	4.67e-07	2.37e-05	1.67e-05	LOC115704488/LOC115702752/LOC115702766/LOC115702813/LOC115702872/LOC115703044/LOC115703046/LOC115703121/LOC115707433/LOC115704855/LOC115706453/LOC115707169/LOC115708212/LOC115709107/LOC115711075/LOC115711086/LOC115713717/LOC115713758/LOC115714021/LOC115719082/LOC115724500/LOC115697752/LOC115698748/LOC115698826/LOC115699021/LOC115701440/LOC115705198/LOC115705510/LOC115705433/LOC115708077/LOC115707…	185
45	H3K4me3	GO:0065004	protein-DNA complex assembly	92/11786	97/15562	4.79e-07	2.38e-05	1.67e-05	LOC115703105/LOC115703107/LOC115703141/LOC115705574/LOC115705372/LOC115697659/LOC115700075/LOC115701199/LOC115703693/LOC115707202/LOC115705161/LOC115707578/LOC115705214/LOC115705230/LOC115704793/LOC115704735/LOC115705795/LOC115706196/LOC115708283/LOC115707024/LOC115707069/LOC115707206/LOC115707276/LOC115707402/LOC115707539/LOC115705259/LOC115709720/LOC115708803/LOC115709767/LOC115709826/LOC115710…	92
46	H3K4me3	GO:0045132	meiotic chromosome segregation	52/11786	52/15562	5.15e-07	2.49e-05	1.75e-05	LOC115703121/LOC115703167/LOC115720388/LOC115709986/LOC115699159/LOC115706800/LOC115707602/LOC115704754/LOC115704365/LOC115706429/LOC115705680/LOC115705795/LOC115708236/LOC115706010/LOC115706016/LOC115703644/LOC115704718/LOC115704124/LOC115705259/LOC115708656/LOC115709424/LOC115708746/LOC115710062/LOC115709720/LOC115709598/LOC115712153/LOC115713985/LOC115712072/LOC115714357/LOC115715993/LOC115716…	52
47	H3K4me3	GO:0016054	organic acid catabolic process	116/11786	125/15562	5.34e-07	2.49e-05	1.75e-05	LOC115702935/LOC115702968/LOC115704443/LOC115713573/LOC115723066/LOC115704012/LOC115706299/LOC115707082/LOC115708896/LOC115699010/LOC115699125/LOC115702331/LOC115705444/LOC115706279/LOC115706202/LOC115705119/LOC115706743/LOC115706744/LOC115706668/LOC115708301/LOC115705451/LOC115705619/LOC115708195/LOC115705496/LOC115706405/LOC115706516/LOC115706832/LOC115706670/LOC115707183/LOC115707261/LOC115707…	116
48	H3K4me3	GO:0046395	carboxylic acid catabolic process	116/11786	125/15562	5.34e-07	2.49e-05	1.75e-05	LOC115702935/LOC115702968/LOC115704443/LOC115713573/LOC115723066/LOC115704012/LOC115706299/LOC115707082/LOC115708896/LOC115699010/LOC115699125/LOC115702331/LOC115705444/LOC115706279/LOC115706202/LOC115705119/LOC115706743/LOC115706744/LOC115706668/LOC115708301/LOC115705451/LOC115705619/LOC115708195/LOC115705496/LOC115706405/LOC115706516/LOC115706832/LOC115706670/LOC115707183/LOC115707261/LOC115707…	116
49	H3K4me3	GO:0007127	meiosis I	61/11786	62/15562	6.63e-07	3.02e-05	2.12e-05	LOC115702602/LOC115702618/LOC115702630/LOC115703137/LOC115703121/LOC115703167/LOC115720388/LOC115703420/LOC115709986/LOC115699159/LOC115705836/LOC115706132/LOC115706800/LOC115707602/LOC115704793/LOC115704735/LOC115707892/LOC115705602/LOC115706429/LOC115705680/LOC115708236/LOC115705989/LOC115703644/LOC115704718/LOC115704124/LOC115705259/LOC115708656/LOC115709424/LOC115708746/LOC115710062/LOC115709…	61
50	H3K4me3	GO:0043161	proteasome-mediated ubiquitin-dependent protein catabolic process	177/11786	198/15562	7.95e-07	3.55e-05	2.49e-05	LOC115702658/LOC115702663/LOC115702752/LOC115702794/LOC115703159/LOC115703165/LOC115720495/LOC115721901/LOC115700096/LOC115702843/LOC115703805/LOC115706219/LOC115709753/LOC115709802/LOC115709948/LOC115711205/LOC115714059/LOC115720532/LOC115721654/LOC115723577/LOC115725385/LOC115697670/LOC115697677/LOC115699147/LOC115700255/LOC115700278/LOC115701025/LOC115701199/LOC115702317/LOC115708098/LOC115704…	177
51	H3K4me3	GO:0009314	response to radiation	375/11786	441/15562	8.28e-07	3.63e-05	2.55e-05	LOC115702661/LOC115702815/LOC115702819/LOC115702833/LOC115702859/LOC115703137/LOC115703002/LOC115703001/LOC115703016/LOC115704053/LOC115702401/LOC115703047/LOC115703234/LOC115707433/LOC115704443/LOC115713415/LOC115713739/LOC115715228/LOC115715318/LOC115695332/LOC115695661/LOC115695269/LOC115695743/LOC115700804/LOC115703544/LOC115704391/LOC115704514/LOC115704903/LOC115706017/LOC115706057/LOC115707…	375
52	H3K4me3	GO:0006605	protein targeting	195/11786	220/15562	9.83e-07	4.22e-05	2.96e-05	LOC115702642/LOC115702808/LOC115702879/LOC115702892/LOC115702923/LOC115703009/LOC115703086/LOC115703087/LOC115713739/LOC115723066/LOC115699346/LOC115700804/LOC115702343/LOC115703223/LOC115706299/LOC115707682/LOC115708514/LOC115708202/LOC115711387/LOC115713121/LOC115715804/LOC115697285/LOC115702317/LOC115705543/LOC115705836/LOC115708339/LOC115708225/LOC115705089/LOC115706482/LOC115708161/LOC115706…	195
53	H3K4me3	GO:0009657	plastid organization	187/11786	211/15562	1.67e-06	7.05e-05	4.95e-05	LOC115702650/LOC115702831/LOC115702840/LOC115702934/LOC115714780/LOC115703174/LOC115713415/LOC115713739/LOC115719777/LOC115721223/LOC115716371/LOC115702343/LOC115703620/LOC115703656/LOC115703727/LOC115704378/LOC115706057/LOC115706195/LOC115708785/LOC115708793/LOC115711190/LOC115713910/LOC115714206/LOC115714532/LOC115697431/LOC115699812/LOC115699901/LOC115701908/LOC115702322/LOC115702350/LOC115707…	187
54	H3K4me3	GO:0051301	cell division	289/11786	336/15562	1.87e-06	7.74e-05	5.43e-05	LOC115702594/LOC115702619/LOC115702818/LOC115702834/LOC115703137/LOC115705486/LOC115703222/LOC115704043/LOC115720436/LOC115720388/LOC115702797/LOC115703080/LOC115703648/LOC115704249/LOC115705321/LOC115706975/LOC115707719/LOC115708347/LOC115708936/LOC115702512/LOC115709591/LOC115720032/LOC115712240/LOC115713754/LOC115713964/LOC115717510/LOC115719232/LOC115697268/LOC115697487/LOC115699147/LOC115699…	289
55	H3K4me3	GO:0006643	membrane lipid metabolic process	104/11786	112/15562	1.94e-06	7.9e-05	5.55e-05	LOC115702927/LOC115702715/LOC115702965/LOC115706555/LOC115707000/LOC115707728/LOC115708276/LOC115709151/LOC115712025/LOC115713775/LOC115714045/LOC115698229/LOC115700382/LOC115706113/LOC115706029/LOC115705095/LOC115705232/LOC115704904/LOC115704960/LOC115706612/LOC115705557/LOC115705539/LOC115705654/LOC115705608/LOC115708206/LOC115706653/LOC115706893/LOC115704685/LOC115707058/LOC115707138/LOC115707…	104
56	H3K4me3	GO:0006753	nucleoside phosphate metabolic process	262/11786	303/15562	2.19e-06	8.73e-05	6.13e-05	LOC115702783/LOC115702801/LOC115702836/LOC115702850/LOC115702934/LOC115703114/LOC115703131/LOC115703157/LOC115703193/LOC115709998/LOC115722977/LOC115724952/LOC115702987/LOC115704378/LOC115704957/LOC115705607/LOC115708064/LOC115708073/LOC115709638/LOC115709698/LOC115710101/LOC115710480/LOC115710877/LOC115710919/LOC115711259/LOC115711637/LOC115711722/LOC115712548/LOC115713640/LOC115714139/LOC115723…	262
57	H3K4me3	GO:0007005	mitochondrion organization	151/11786	168/15562	2.34e-06	9.19e-05	6.45e-05	LOC115702840/LOC115702879/LOC115702892/LOC115702923/LOC115702566/LOC115698387/LOC115699346/LOC115703596/LOC115707193/LOC115707638/LOC115707661/LOC115708556/LOC115708514/LOC115710860/LOC115713121/LOC115705994/LOC115705543/LOC115703830/LOC115706583/LOC115706584/LOC115706608/LOC115706681/LOC115708272/LOC115708161/LOC115705865/LOC115704985/LOC115705597/LOC115706283/LOC115706957/LOC115706722/LOC115706…	151
58	H3K4me3	GO:0043414	macromolecule methylation	194/11786	220/15562	2.45e-06	9.45e-05	6.63e-05	LOC115702773/LOC115716842/LOC115703081/LOC115703121/LOC115702434/LOC115705920/LOC115707433/LOC115716590/LOC115725500/LOC115703913/LOC115704514/LOC115706453/LOC115708212/LOC115709107/LOC115710463/LOC115714021/LOC115719082/LOC115697752/LOC115698826/LOC115699010/LOC115699021/LOC115699522/LOC115700459/LOC115705198/LOC115706782/LOC115708077/LOC115707975/LOC115705236/LOC115707790/LOC115708179/LOC115705…	194
59	H3K4me3	GO:0071806	protein transmembrane transport	84/11786	89/15562	2.93e-06	0.000111096	7.8e-05	LOC115702879/LOC115702892/LOC115703009/LOC115713739/LOC115723066/LOC115699346/LOC115700804/LOC115702343/LOC115703223/LOC115706299/LOC115708514/LOC115711387/LOC115713121/LOC115705543/LOC115708161/LOC115706827/LOC115707514/LOC115707059/LOC115707486/LOC115707508/LOC115705271/LOC115710047/LOC115709349/LOC115711532/LOC115711629/LOC115708937/LOC115711406/LOC115709760/LOC115711267/LOC115709058/LOC115710…	84
60	H3K4me3	GO:0010564	regulation of cell cycle process	107/11786	116/15562	3.38e-06	0.000125946	8.84e-05	LOC115702671/LOC115703082/LOC115703195/LOC115719849/LOC115723901/LOC115702797/LOC115703080/LOC115705372/LOC115708347/LOC115713754/LOC115722563/LOC115699147/LOC115699428/LOC115700312/LOC115700579/LOC115702316/LOC115705997/LOC115706060/LOC115705653/LOC115706681/LOC115707955/LOC115706082/LOC115705540/LOC115704754/LOC115704365/LOC115705665/LOC115705670/LOC115705989/LOC115706373/LOC115706898/LOC115707…	107
61	H3K4me3	GO:0016192	vesicle-mediated transport	378/11786	448/15562	4.01e-06	0.000146946	0.00010312	LOC115702618/LOC115702630/LOC115702674/LOC115702675/LOC115702727/LOC115702737/LOC115702753/LOC115702754/LOC115702816/LOC115705037/LOC115703086/LOC115703087/LOC115703160/LOC115704956/LOC115705660/LOC115710575/LOC115713633/LOC115714437/LOC115702605/LOC115702615/LOC115705575/LOC115705833/LOC115705842/LOC115708838/LOC115709655/LOC115710763/LOC115711980/LOC115713143/LOC115713500/LOC115713617/LOC115713…	378
62	H3K4me3	GO:0006399	tRNA metabolic process	190/11786	216/15562	4.6e-06	0.000163014	0.000114396	LOC115702831/LOC115702839/LOC115702840/LOC115703081/LOC115703235/LOC115721396/LOC115712436/LOC115701640/LOC115703071/LOC115703284/LOC115703913/LOC115708158/LOC115710161/LOC115710828/LOC115710972/LOC115712383/LOC115699663/LOC115700204/LOC115706099/LOC115706903/LOC115705236/LOC115707790/LOC115708179/LOC115705537/LOC115706732/LOC115707642/LOC115707768/LOC115704878/LOC115704040/LOC115705201/LOC115706…	190
63	H3K4me3	GO:0044270	cellular nitrogen compound catabolic process	190/11786	216/15562	4.6e-06	0.000163014	0.000114396	LOC115702736/LOC115701559/LOC115702795/LOC115702809/LOC115702867/LOC115702924/LOC115702968/LOC115703193/LOC115703195/LOC115696485/LOC115694915/LOC115697784/LOC115696655/LOC115695062/LOC115697868/LOC115703071/LOC115703796/LOC115704249/LOC115709368/LOC115697431/LOC115695344/LOC115699125/LOC115705519/LOC115705686/LOC115705119/LOC115706264/LOC115708282/LOC115706748/LOC115708325/LOC115705197/LOC115706…	190
64	H3K4me3	GO:0061024	membrane organization	189/11786	215/15562	5.37e-06	0.000187454	0.000131547	LOC115702923/LOC115704956/LOC115713415/LOC115713633/LOC115714437/LOC115716371/LOC115699346/LOC115702343/LOC115703620/LOC115704030/LOC115702415/LOC115706057/LOC115708838/LOC115714343/LOC115720112/LOC115697431/LOC115698271/LOC115699031/LOC115699812/LOC115699901/LOC115700723/LOC115702171/LOC115702322/LOC115702350/LOC115708108/LOC115707544/LOC115705189/LOC115708180/LOC115708162/LOC115705441/LOC115705…	189
65	H3K4me3	GO:0009416	response to light stimulus	355/11786	420/15562	5.56e-06	0.000187814	0.000131799	LOC115702661/LOC115702815/LOC115702819/LOC115702833/LOC115702859/LOC115703002/LOC115703001/LOC115703016/LOC115704053/LOC115702401/LOC115703047/LOC115703234/LOC115707433/LOC115704443/LOC115713415/LOC115713739/LOC115715228/LOC115715318/LOC115695332/LOC115695661/LOC115695269/LOC115695743/LOC115700804/LOC115703544/LOC115704391/LOC115704514/LOC115704903/LOC115706017/LOC115706057/LOC115707291/LOC115708…	355
66	H3K4me3	GO:0061982	meiosis I cell cycle process	68/11786	71/15562	5.61e-06	0.000187814	0.000131799	LOC115702602/LOC115702618/LOC115702630/LOC115703137/LOC115703121/LOC115703167/LOC115705387/LOC115720388/LOC115703420/LOC115709986/LOC115699159/LOC115705836/LOC115705470/LOC115703720/LOC115706132/LOC115706800/LOC115707602/LOC115704793/LOC115704735/LOC115707892/LOC115705602/LOC115706429/LOC115705680/LOC115708236/LOC115705989/LOC115703644/LOC115704718/LOC115704124/LOC115705259/LOC115708656/LOC115709…	68
67	H3K4me3	GO:0044282	small molecule catabolic process	170/11786	192/15562	5.7e-06	0.000187814	0.000131799	LOC115702935/LOC115702968/LOC115704443/LOC115713573/LOC115723066/LOC115704012/LOC115704378/LOC115705564/LOC115706299/LOC115707082/LOC115708896/LOC115710644/LOC115714030/LOC115699010/LOC115699125/LOC115702331/LOC115705544/LOC115705444/LOC115706279/LOC115706202/LOC115705119/LOC115706046/LOC115706180/LOC115706743/LOC115706744/LOC115706668/LOC115708301/LOC115705451/LOC115705619/LOC115708195/LOC115706…	170
68	H3K4me3	GO:0009117	nucleotide metabolic process	255/11786	296/15562	5.71e-06	0.000187814	0.000131799	LOC115702783/LOC115702801/LOC115702836/LOC115702850/LOC115702934/LOC115703114/LOC115703131/LOC115703157/LOC115703193/LOC115709998/LOC115722977/LOC115724952/LOC115704378/LOC115704957/LOC115705607/LOC115708064/LOC115708073/LOC115709638/LOC115709698/LOC115710101/LOC115710480/LOC115710877/LOC115710919/LOC115711259/LOC115711637/LOC115711722/LOC115712548/LOC115713640/LOC115714139/LOC115723768/LOC115699…	255
69	H3K4me3	GO:0007131	reciprocal meiotic recombination	52/11786	53/15562	7.03e-06	0.000221425	0.000155386	LOC115702602/LOC115702618/LOC115702630/LOC115703137/LOC115703121/LOC115703167/LOC115703420/LOC115699159/LOC115705836/LOC115706132/LOC115707602/LOC115704793/LOC115704735/LOC115707892/LOC115705602/LOC115706429/LOC115705680/LOC115705989/LOC115703644/LOC115704718/LOC115704124/LOC115708656/LOC115709424/LOC115708746/LOC115710062/LOC115709720/LOC115711614/LOC115714035/LOC115712153/LOC115713985/LOC115712…	52
70	H3K4me3	GO:0035825	homologous recombination	52/11786	53/15562	7.03e-06	0.000221425	0.000155386	LOC115702602/LOC115702618/LOC115702630/LOC115703137/LOC115703121/LOC115703167/LOC115703420/LOC115699159/LOC115705836/LOC115706132/LOC115707602/LOC115704793/LOC115704735/LOC115707892/LOC115705602/LOC115706429/LOC115705680/LOC115705989/LOC115703644/LOC115704718/LOC115704124/LOC115708656/LOC115709424/LOC115708746/LOC115710062/LOC115709720/LOC115711614/LOC115714035/LOC115712153/LOC115713985/LOC115712…	52
71	H3K4me3	GO:0140527	reciprocal homologous recombination	52/11786	53/15562	7.03e-06	0.000221425	0.000155386	LOC115702602/LOC115702618/LOC115702630/LOC115703137/LOC115703121/LOC115703167/LOC115703420/LOC115699159/LOC115705836/LOC115706132/LOC115707602/LOC115704793/LOC115704735/LOC115707892/LOC115705602/LOC115706429/LOC115705680/LOC115705989/LOC115703644/LOC115704718/LOC115704124/LOC115708656/LOC115709424/LOC115708746/LOC115710062/LOC115709720/LOC115711614/LOC115714035/LOC115712153/LOC115713985/LOC115712…	52
72	H3K4me3	GO:0017038	protein import	103/11786	112/15562	7.55e-06	0.000231026	0.000162124	LOC115702879/LOC115702892/LOC115702923/LOC115703009/LOC115713739/LOC115723066/LOC115700804/LOC115703223/LOC115705296/LOC115706299/LOC115708514/LOC115712334/LOC115713121/LOC115705543/LOC115705580/LOC115705549/LOC115708161/LOC115705463/LOC115705865/LOC115705641/LOC115706275/LOC115706827/LOC115707514/LOC115707059/LOC115707125/LOC115707486/LOC115707508/LOC115705271/LOC115710047/LOC115709349/LOC115711…	103
73	H3K4me3	GO:0051052	regulation of DNA metabolic process	103/11786	112/15562	7.55e-06	0.000231026	0.000162124	LOC115702671/LOC115705387/LOC115716590/LOC115725500/LOC115703080/LOC115703544/LOC115703697/LOC115705372/LOC115705615/LOC115710463/LOC115711167/LOC115722563/LOC115697752/LOC115699010/LOC115700312/LOC115705470/LOC115703720/LOC115705644/LOC115706681/LOC115706223/LOC115707578/LOC115705214/LOC115705989/LOC115706820/LOC115705247/LOC115708698/LOC115709098/LOC115709941/LOC115709770/LOC115709746/LOC115709…	103
74	H3K4me3	GO:0007346	regulation of mitotic cell cycle	73/11786	77/15562	8.32e-06	0.000251207	0.000176286	LOC115702671/LOC115703082/LOC115723901/LOC115702797/LOC115708347/LOC115713754/LOC115699147/LOC115699428/LOC115700579/LOC115702316/LOC115705997/LOC115706060/LOC115705653/LOC115707955/LOC115706082/LOC115705540/LOC115704754/LOC115704365/LOC115706898/LOC115707872/LOC115708656/LOC115709424/LOC115711362/LOC115710268/LOC115709043/LOC115709353/LOC115715115/LOC115711949/LOC115713963/LOC115714937/LOC115713…	73
75	H3K4me3	GO:0071478	cellular response to radiation	79/11786	84/15562	8.93e-06	0.000263188	0.000184694	LOC115702815/LOC115702819/LOC115702833/LOC115703137/LOC115703002/LOC115703001/LOC115703234/LOC115695332/LOC115695661/LOC115695269/LOC115695743/LOC115704903/LOC115706017/LOC115706057/LOC115710101/LOC115711038/LOC115699248/LOC115700135/LOC115701871/LOC115706248/LOC115705128/LOC115705617/LOC115705838/LOC115705682/LOC115703637/LOC115707394/LOC115707411/LOC115707678/LOC115707942/LOC115708655/LOC115710…	79
76	H3K4me3	GO:0022622	root system development	243/11786	282/15562	9.07e-06	0.000263188	0.000184694	LOC115702611/LOC115702773/LOC115716842/LOC115703054/LOC115703151/LOC115703179/LOC115715318/LOC115717286/LOC115720249/LOC115721901/LOC115697104/LOC115704378/LOC115704558/LOC115702461/LOC115709638/LOC115710554/LOC115712694/LOC115712842/LOC115713424/LOC115714021/LOC115717510/LOC115697219/LOC115697325/LOC115699728/LOC115701709/LOC115703642/LOC115706462/LOC115706637/LOC115707648/LOC115704658/LOC115703…	243
77	H3K4me3	GO:0048364	root development	243/11786	282/15562	9.07e-06	0.000263188	0.000184694	LOC115702611/LOC115702773/LOC115716842/LOC115703054/LOC115703151/LOC115703179/LOC115715318/LOC115717286/LOC115720249/LOC115721901/LOC115697104/LOC115704378/LOC115704558/LOC115702461/LOC115709638/LOC115710554/LOC115712694/LOC115712842/LOC115713424/LOC115714021/LOC115717510/LOC115697219/LOC115697325/LOC115699728/LOC115701709/LOC115703642/LOC115706462/LOC115706637/LOC115707648/LOC115704658/LOC115703…	243
78	H3K4me3	GO:0006414	translational elongation	143/11786	160/15562	9.44e-06	0.000268931	0.000188724	LOC115710758/LOC115703155/LOC115702664/LOC115703190/LOC115705306/LOC115705607/LOC115710185/LOC115710634/LOC115697211/LOC115697670/LOC115697677/LOC115698371/LOC115698486/LOC115699059/LOC115699747/LOC115705131/LOC115705624/LOC115706493/LOC115705593/LOC115707807/LOC115705834/LOC115706739/LOC115705426/LOC115706128/LOC115705206/LOC115705202/LOC115705054/LOC115706232/LOC115704972/LOC115704770/LOC115705…	143
79	H3K4me3	GO:0051128	regulation of cellular component organization	234/11786	271/15562	9.55e-06	0.000268931	0.000188724	LOC115702674/LOC115702734/LOC115702733/LOC115702784/LOC115702799/LOC115703082/LOC115703121/LOC115722899/LOC115704956/LOC115716751/LOC115699804/LOC115703596/LOC115704038/LOC115704122/LOC115704128/LOC115704802/LOC115710763/LOC115711048/LOC115712375/LOC115712383/LOC115714117/LOC115697752/LOC115699147/LOC115696506/LOC115701199/LOC115707804/LOC115707220/LOC115705198/LOC115706608/LOC115705997/LOC115706…	234
80	H3K4me3	GO:0040029	epigenetic regulation of gene expression	128/11786	142/15562	9.63e-06	0.000268931	0.000188724	LOC115702592/LOC115724257/LOC115703251/LOC115707433/LOC115716590/LOC115702759/LOC115702778/LOC115704038/LOC115704391/LOC115706453/LOC115709095/LOC115711694/LOC115697325/LOC115697752/LOC115699021/LOC115699522/LOC115702261/LOC115705198/LOC115706762/LOC115706763/LOC115705161/LOC115703950/LOC115705095/LOC115705051/LOC115705449/LOC115707578/LOC115705817/LOC115706055/LOC115705214/LOC115707890/LOC115705…	128
81	H3K4me3	GO:0034655	nucleobase-containing compound catabolic process	152/11786	171/15562	1.06e-05	0.000291385	0.000204481	LOC115702736/LOC115701559/LOC115702795/LOC115702809/LOC115703193/LOC115703195/LOC115696485/LOC115694915/LOC115697784/LOC115696655/LOC115695062/LOC115697868/LOC115703071/LOC115703796/LOC115704249/LOC115709368/LOC115695344/LOC115706264/LOC115706748/LOC115705197/LOC115706055/LOC115706139/LOC115705713/LOC115708273/LOC115705405/LOC115705873/LOC115708306/LOC115705497/LOC115705625/LOC115705767/LOC115708…	152
82	H3K4me3	GO:0051304	chromosome separation	41/11786	41/15562	1.11e-05	0.000301619	0.000211663	LOC115703082/LOC115703121/LOC115703167/LOC115699147/LOC115705997/LOC115706060/LOC115707955/LOC115706082/LOC115704754/LOC115704365/LOC115706429/LOC115705680/LOC115705795/LOC115706898/LOC115708656/LOC115709424/LOC115708746/LOC115711362/LOC115709720/LOC115709353/LOC115711949/LOC115713293/LOC115713985/LOC115712072/LOC115715993/LOC115716869/LOC115716070/LOC115716894/LOC115720767/LOC115721249/LOC115718…	41
83	H3K4me3	GO:0046700	heterocycle catabolic process	192/11786	220/15562	1.35e-05	0.000363131	0.000254829	LOC115702736/LOC115701559/LOC115702795/LOC115702809/LOC115702924/LOC115702968/LOC115703193/LOC115703195/LOC115696485/LOC115694915/LOC115697784/LOC115696655/LOC115695062/LOC115697868/LOC115703071/LOC115703796/LOC115704249/LOC115709368/LOC115697431/LOC115695344/LOC115699125/LOC115705519/LOC115705686/LOC115705119/LOC115706264/LOC115708282/LOC115706748/LOC115708325/LOC115705197/LOC115706055/LOC115706…	192
84	H3K4me3	GO:0070192	chromosome organization involved in meiotic cell cycle	40/11786	40/15562	1.46e-05	0.000389091	0.000273047	LOC115720388/LOC115709986/LOC115699159/LOC115706800/LOC115707602/LOC115704793/LOC115704754/LOC115704365/LOC115704735/LOC115706429/LOC115705680/LOC115708236/LOC115706010/LOC115703644/LOC115704718/LOC115704124/LOC115708656/LOC115710062/LOC115709720/LOC115709598/LOC115712153/LOC115716070/LOC115716370/LOC115721367/LOC115722352/LOC115723187/LOC115722027/LOC115722511/LOC115721811/LOC115723969/LOC115724…	40
85	H3K4me3	GO:0065002	intracellular protein transmembrane transport	70/11786	74/15562	1.65e-05	0.000432912	0.000303798	LOC115702879/LOC115702892/LOC115703009/LOC115723066/LOC115700804/LOC115702343/LOC115703223/LOC115706299/LOC115708514/LOC115711387/LOC115713121/LOC115705543/LOC115708161/LOC115706827/LOC115707514/LOC115707059/LOC115707486/LOC115707508/LOC115705271/LOC115710047/LOC115709349/LOC115711532/LOC115711629/LOC115708937/LOC115711406/LOC115709760/LOC115711267/LOC115709058/LOC115710058/LOC115712478/LOC115713…	70
86	H3K4me3	GO:0045934	negative regulation of nucleobase-containing compound metabolic process	195/11786	224/15562	1.67e-05	0.000434371	0.000304822	LOC115702592/LOC115704488/LOC115702766/LOC115702813/LOC115724257/LOC115703078/LOC115705387/LOC115707433/LOC115716590/LOC115720249/LOC115694702/LOC115695222/LOC115702759/LOC115702778/LOC115703697/LOC115704745/LOC115704249/LOC115706453/LOC115709095/LOC115710310/LOC115711075/LOC115711694/LOC115712195/LOC115714021/LOC115722563/LOC115697325/LOC115697752/LOC115698748/LOC115699021/LOC115700469/LOC115700…	195
87	H3K4me3	GO:0046467	membrane lipid biosynthetic process	87/11786	94/15562	2.01e-05	0.000515588	0.000361816	LOC115702927/LOC115702715/LOC115702965/LOC115706555/LOC115707000/LOC115707728/LOC115708276/LOC115709151/LOC115713775/LOC115714045/LOC115698229/LOC115700382/LOC115706029/LOC115705095/LOC115705232/LOC115706612/LOC115705557/LOC115705539/LOC115705654/LOC115705608/LOC115706653/LOC115706893/LOC115707058/LOC115707138/LOC115707216/LOC115707446/LOC115707765/LOC115705280/LOC115708821/LOC115711507/LOC115709…	87
88	H3K4me3	GO:0010608	post-transcriptional regulation of gene expression	198/11786	228/15562	2.05e-05	0.000521469	0.000365943	LOC115702736/LOC115703071/LOC115703656/LOC115704249/LOC115704391/LOC115713910/LOC115714443/LOC115695344/LOC115699522/LOC115696400/LOC115699825/LOC115704831/LOC115706583/LOC115706584/LOC115703653/LOC115705691/LOC115706748/LOC115703950/LOC115705981/LOC115705657/LOC115705095/LOC115705141/LOC115705197/LOC115705051/LOC115705449/LOC115705817/LOC115706055/LOC115707890/LOC115707516/LOC115707422/LOC115705…	198
89	H3K4me3	GO:0042180	cellular ketone metabolic process	97/11786	106/15562	2.46e-05	0.000618001	0.000433685	LOC115723648/LOC115702968/LOC115722899/LOC115695922/LOC115695831/LOC115705564/LOC115707291/LOC115707519/LOC115708026/LOC115711315/LOC115695001/LOC115698174/LOC115699125/LOC115705544/LOC115705119/LOC115703789/LOC115703977/LOC115707656/LOC115706866/LOC115705402/LOC115705379/LOC115705779/LOC115705936/LOC115706417/LOC115706724/LOC115706896/LOC115707058/LOC115707284/LOC115707697/LOC115707793/LOC115708…	97
90	H3K4me3	GO:0008654	phospholipid biosynthetic process	142/11786	160/15562	2.51e-05	0.000623391	0.000437467	LOC115702611/LOC115708996/LOC115703150/LOC115703157/LOC115703163/LOC115709998/LOC115702965/LOC115708276/LOC115709308/LOC115710352/LOC115710976/LOC115711722/LOC115697219/LOC115698229/LOC115705473/LOC115705468/LOC115705504/LOC115703600/LOC115705441/LOC115705095/LOC115705232/LOC115705879/LOC115708316/LOC115704902/LOC115707172/LOC115705116/LOC115705492/LOC115705585/LOC115705608/LOC115707217/LOC115705…	142
91	H3K4me3	GO:0015979	photosynthesis	177/11786	203/15562	3.3e-05	0.000810519	0.000568785	LOC115702645/LOC115702780/LOC115702804/LOC115703235/LOC115705832/LOC115713739/LOC115721223/LOC115725674/LOC115702507/LOC115704122/LOC115704128/LOC115704378/LOC115704957/LOC115706341/LOC115708695/LOC115709698/LOC115710616/LOC115710629/LOC115710932/LOC115711609/LOC115711619/LOC115711637/LOC115711764/LOC115713747/LOC115697431/LOC115698271/LOC115699047/LOC115701464/LOC115701809/LOC115702322/LOC115705…	177
92	H3K4me3	GO:0042273	ribosomal large subunit biogenesis	90/11786	98/15562	3.36e-05	0.000816799	0.000573192	LOC115710511/LOC115697311/LOC115697394/LOC115705361/LOC115708919/LOC115698624/LOC115700054/LOC115705545/LOC115704898/LOC115707808/LOC115705126/LOC115705011/LOC115706595/LOC115707731/LOC115707507/LOC115706442/LOC115703901/LOC115704888/LOC115705943/LOC115706030/LOC115707020/LOC115706414/LOC115707032/LOC115707838/LOC115708052/LOC115708074/LOC115709788/LOC115709617/LOC115709415/LOC115711482/LOC115709…	90
93	H3K4me3	GO:0006302	double-strand break repair	110/11786	122/15562	4e-05	0.00096076	0.000674218	LOC115703137/LOC115704434/LOC115703167/LOC115705574/LOC115703953/LOC115703420/LOC115705836/LOC115706157/LOC115706037/LOC115706462/LOC115706637/LOC115706132/LOC115704979/LOC115706800/LOC115705230/LOC115707602/LOC115704793/LOC115704735/LOC115707106/LOC115707892/LOC115705602/LOC115705676/LOC115705682/LOC115703637/LOC115708237/LOC115705989/LOC115707747/LOC115705247/LOC115705294/LOC115705288/LOC115707…	110
94	H3K4me3	GO:0046686	response to cadmium ion	139/11786	157/15562	4.1e-05	0.000968473	0.00067963	LOC115702620/LOC115702629/LOC115702913/LOC115703228/LOC115702336/LOC115703190/LOC115707082/LOC115710185/LOC115710860/LOC115712334/LOC115713640/LOC115713783/LOC115697690/LOC115698731/LOC115699010/LOC115699837/LOC115703671/LOC115705444/LOC115707101/LOC115703647/LOC115707804/LOC115707220/LOC115706046/LOC115706180/LOC115704024/LOC115706732/LOC115705560/LOC115705524/LOC115705230/LOC115705569/LOC115704…	139
95	H3K4me3	GO:0071482	cellular response to light stimulus	72/11786	77/15562	4.12e-05	0.000968473	0.00067963	LOC115702815/LOC115702819/LOC115702833/LOC115703002/LOC115703001/LOC115703234/LOC115695332/LOC115695661/LOC115695269/LOC115695743/LOC115704903/LOC115706017/LOC115706057/LOC115710101/LOC115711038/LOC115699248/LOC115700135/LOC115701871/LOC115706248/LOC115705128/LOC115705617/LOC115705838/LOC115707394/LOC115707411/LOC115707678/LOC115707942/LOC115708655/LOC115710333/LOC115709363/LOC115710267/LOC115711…	72
96	H3K4me3	GO:1901293	nucleoside phosphate biosynthetic process	157/11786	179/15562	4.44e-05	0.00102731	0.000720917	LOC115702850/LOC115703157/LOC115709998/LOC115722977/LOC115724952/LOC115702987/LOC115704957/LOC115705607/LOC115708064/LOC115708073/LOC115709638/LOC115709698/LOC115710101/LOC115710480/LOC115710877/LOC115710919/LOC115712548/LOC115713640/LOC115699417/LOC115702238/LOC115702361/LOC115705472/LOC115705471/LOC115703600/LOC115706092/LOC115707175/LOC115707758/LOC115707664/LOC115706733/LOC115705417/LOC115705…	157
97	H3K4me3	GO:0051783	regulation of nuclear division	36/11786	36/15562	4.46e-05	0.00102731	0.000720917	LOC115703082/LOC115699147/LOC115705997/LOC115706060/LOC115707955/LOC115706082/LOC115704754/LOC115704365/LOC115705665/LOC115705670/LOC115705989/LOC115706898/LOC115710062/LOC115711362/LOC115709353/LOC115711949/LOC115713293/LOC115714012/LOC115715993/LOC115716869/LOC115720767/LOC115721249/LOC115718402/LOC115721774/LOC115721872/LOC115721782/LOC115725099/LOC115697930/LOC115697539/LOC115699316/LOC115701…	36
98	H3K4me3	GO:0000278	mitotic cell cycle	201/11786	233/15562	4.57e-05	0.00104282	0.000731803	LOC115702619/LOC115702671/LOC115702711/LOC115702732/LOC115702818/LOC115702834/LOC115702964/LOC115703082/LOC115703222/LOC115704043/LOC115723901/LOC115702797/LOC115699804/LOC115702647/LOC115705372/LOC115706017/LOC115707719/LOC115708347/LOC115708936/LOC115709986/LOC115711061/LOC115711182/LOC115712112/LOC115713754/LOC115713814/LOC115714593/LOC115714604/LOC115719232/LOC115697268/LOC115698324/LOC115698…	201
99	H3K4me3	GO:0019684	photosynthesis, light reaction	88/11786	96/15562	4.99e-05	0.0011148	0.000782316	LOC115702645/LOC115702780/LOC115702804/LOC115703235/LOC115721223/LOC115725674/LOC115702507/LOC115704957/LOC115708695/LOC115709698/LOC115710932/LOC115711609/LOC115713747/LOC115697431/LOC115701809/LOC115705580/LOC115706424/LOC115707657/LOC115705395/LOC115706020/LOC115706303/LOC115706508/LOC115706526/LOC115707116/LOC115707281/LOC115707282/LOC115707498/LOC115704620/LOC115705256/LOC115705298/LOC115707…	88
100	H3K4me3	GO:0009790	embryo development	230/11786	269/15562	5.04e-05	0.0011148	0.000782316	LOC115702702/LOC115702708/LOC115702861/LOC115702918/LOC115723648/LOC115703078/LOC115703105/LOC115703141/LOC115722899/LOC115723387/LOC115701640/LOC115703061/LOC115703727/LOC115704558/LOC115706299/LOC115708158/LOC115709817/LOC115710094/LOC115710161/LOC115710310/LOC115710594/LOC115713424/LOC115718911/LOC115724500/LOC115697395/LOC115698925/LOC115701709/LOC115702350/LOC115702351/LOC115706868/LOC115707…	230
101	H3K4me3	GO:0009890	negative regulation of biosynthetic process	230/11786	269/15562	5.04e-05	0.0011148	0.000782316	LOC115702592/LOC115704488/LOC115702736/LOC115702766/LOC115702813/LOC115724257/LOC115703078/LOC115705832/LOC115707433/LOC115716590/LOC115720249/LOC115694702/LOC115695222/LOC115702759/LOC115702778/LOC115703071/LOC115703697/LOC115704745/LOC115706453/LOC115709095/LOC115710310/LOC115711075/LOC115711315/LOC115711619/LOC115711694/LOC115712195/LOC115714021/LOC115722563/LOC115697325/LOC115698748/LOC115699…	230
102	H3K4me3	GO:1901987	regulation of cell cycle phase transition	71/11786	76/15562	5.11e-05	0.00111865	0.000785019	LOC115702671/LOC115703082/LOC115703195/LOC115719849/LOC115723901/LOC115702797/LOC115705372/LOC115708347/LOC115713754/LOC115699147/LOC115699428/LOC115700579/LOC115702316/LOC115707955/LOC115706082/LOC115705540/LOC115704754/LOC115704365/LOC115706898/LOC115707872/LOC115708656/LOC115709424/LOC115710062/LOC115711362/LOC115709686/LOC115709043/LOC115709353/LOC115715115/LOC115711949/LOC115714937/LOC115713…	71
103	H3K4me3	GO:0010558	negative regulation of macromolecule biosynthetic process	217/11786	253/15562	5.28e-05	0.00114646	0.000804533	LOC115702592/LOC115704488/LOC115702736/LOC115702766/LOC115702813/LOC115724257/LOC115703078/LOC115707433/LOC115716590/LOC115720249/LOC115694702/LOC115695222/LOC115702759/LOC115702778/LOC115703071/LOC115703697/LOC115704745/LOC115706453/LOC115709095/LOC115710310/LOC115711075/LOC115711694/LOC115712195/LOC115714021/LOC115722563/LOC115697325/LOC115698748/LOC115699021/LOC115700469/LOC115700622/LOC115701…	217
104	H3K4me3	GO:0033043	regulation of organelle organization	169/11786	194/15562	5.56e-05	0.00119144	0.000836096	LOC115702674/LOC115702734/LOC115702733/LOC115702784/LOC115702799/LOC115703082/LOC115703121/LOC115704956/LOC115699804/LOC115703596/LOC115704038/LOC115704802/LOC115712375/LOC115712383/LOC115697752/LOC115699147/LOC115707804/LOC115707220/LOC115705198/LOC115706608/LOC115705997/LOC115706060/LOC115705653/LOC115706681/LOC115707955/LOC115706082/LOC115707487/LOC115707578/LOC115705214/LOC115705155/LOC115704…	169
105	H3K4me3	GO:0008033	tRNA processing	118/11786	132/15562	5.6e-05	0.00119144	0.000836096	LOC115702831/LOC115703081/LOC115703235/LOC115701640/LOC115703284/LOC115703913/LOC115710828/LOC115712383/LOC115699663/LOC115706099/LOC115706903/LOC115705236/LOC115707790/LOC115708179/LOC115705537/LOC115704878/LOC115704040/LOC115706208/LOC115707541/LOC115708115/LOC115706059/LOC115707146/LOC115706052/LOC115707800/LOC115707168/LOC115708129/LOC115707096/LOC115707270/LOC115707550/LOC115707497/LOC115707…	118
106	H3K4me3	GO:2000113	negative regulation of cellular macromolecule biosynthetic process	208/11786	242/15562	5.65e-05	0.00119166	0.000836254	LOC115702592/LOC115704488/LOC115702736/LOC115702813/LOC115724257/LOC115703078/LOC115707433/LOC115716590/LOC115720249/LOC115702759/LOC115702778/LOC115703071/LOC115703697/LOC115704745/LOC115706453/LOC115709095/LOC115710310/LOC115711694/LOC115712195/LOC115714021/LOC115722563/LOC115697325/LOC115698748/LOC115699021/LOC115700469/LOC115700622/LOC115701521/LOC115701871/LOC115702261/LOC115705510/LOC115704…	208
107	H3K4me3	GO:0009793	embryo development ending in seed dormancy	220/11786	257/15562	6.19e-05	0.00129355	0.000907754	LOC115702702/LOC115702708/LOC115702861/LOC115702918/LOC115723648/LOC115703078/LOC115703105/LOC115703141/LOC115722899/LOC115723387/LOC115701640/LOC115703061/LOC115703727/LOC115704558/LOC115706299/LOC115708158/LOC115709817/LOC115710094/LOC115710161/LOC115710310/LOC115710594/LOC115713424/LOC115718911/LOC115724500/LOC115697395/LOC115698925/LOC115701709/LOC115702350/LOC115702351/LOC115706868/LOC115707…	220
108	H3K4me3	GO:0070482	response to oxygen levels	51/11786	53/15562	6.26e-05	0.00129564	0.000909219	LOC115708662/LOC115705664/LOC115705684/LOC115707488/LOC115706910/LOC115709817/LOC115710310/LOC115711619/LOC115697774/LOC115697874/LOC115704831/LOC115703568/LOC115707742/LOC115707594/LOC115706236/LOC115706239/LOC115707183/LOC115710324/LOC115708928/LOC115709090/LOC115713001/LOC115712801/LOC115712781/LOC115715124/LOC115712392/LOC115715205/LOC115712237/LOC115712219/LOC115714289/LOC115715197/LOC115716…	51
109	H3K4me3	GO:0031327	negative regulation of cellular biosynthetic process	228/11786	267/15562	6.5e-05	0.00133313	0.000935531	LOC115702592/LOC115704488/LOC115702736/LOC115702766/LOC115702813/LOC115724257/LOC115703078/LOC115707433/LOC115716590/LOC115720249/LOC115694702/LOC115695222/LOC115702759/LOC115702778/LOC115703071/LOC115703697/LOC115704745/LOC115706453/LOC115709095/LOC115710310/LOC115711075/LOC115711315/LOC115711694/LOC115712195/LOC115714021/LOC115722563/LOC115697325/LOC115698748/LOC115699021/LOC115699125/LOC115700…	228
110	H3K4me3	GO:0044743	protein transmembrane import into intracellular organelle	43/11786	44/15562	7.26e-05	0.00147577	0.00103563	LOC115702879/LOC115702892/LOC115723066/LOC115700804/LOC115706299/LOC115708514/LOC115713121/LOC115705543/LOC115708161/LOC115706827/LOC115707514/LOC115707486/LOC115709349/LOC115711532/LOC115708937/LOC115711406/LOC115711267/LOC115709058/LOC115710058/LOC115712478/LOC115713032/LOC115713033/LOC115715088/LOC115712058/LOC115712002/LOC115712702/LOC115714264/LOC115717040/LOC115716095/LOC115719112/LOC115719…	43
111	H3K4me3	GO:0140694	non-membrane-bounded organelle assembly	116/11786	130/15562	7.88e-05	0.00157563	0.00110571	LOC115702734/LOC115702733/LOC115702907/LOC115710511/LOC115697784/LOC115697868/LOC115699804/LOC115708919/LOC115709368/LOC115698624/LOC115699845/LOC115705545/LOC115703663/LOC115708353/LOC115708213/LOC115703668/LOC115705126/LOC115705011/LOC115705197/LOC115706595/LOC115707731/LOC115703901/LOC115707381/LOC115708260/LOC115704888/LOC115706671/LOC115706414/LOC115706522/LOC115706962/LOC115707032/LOC115707…	116
112	H3K4me3	GO:0000819	sister chromatid segregation	63/11786	67/15562	7.9e-05	0.00157563	0.00110571	LOC115703082/LOC115720388/LOC115713311/LOC115699147/LOC115706157/LOC115706037/LOC115705997/LOC115706060/LOC115708215/LOC115706772/LOC115707955/LOC115706082/LOC115706800/LOC115704754/LOC115704365/LOC115704349/LOC115706010/LOC115706898/LOC115707265/LOC115705259/LOC115709787/LOC115709424/LOC115711381/LOC115711362/LOC115708803/LOC115709598/LOC115709353/LOC115711949/LOC115713293/LOC115713067/LOC115714…	63
113	H3K4me3	GO:0018208	peptidyl-proline modification	96/11786	106/15562	8.05e-05	0.00159315	0.001118	LOC115703054/LOC115698022/LOC115703373/LOC115703243/LOC115715228/LOC115717462/LOC115699935/LOC115703922/LOC115704638/LOC115706704/LOC115709351/LOC115709861/LOC115709878/LOC115712510/LOC115722782/LOC115703015/LOC115698652/LOC115703693/LOC115707449/LOC115706040/LOC115705383/LOC115705206/LOC115706339/LOC115706367/LOC115706366/LOC115706370/LOC115709019/LOC115708727/LOC115709443/LOC115710840/LOC115709…	96
114	H3K4me3	GO:0009165	nucleotide biosynthetic process	153/11786	175/15562	8.15e-05	0.00159779	0.00112125	LOC115702850/LOC115703157/LOC115709998/LOC115722977/LOC115724952/LOC115704957/LOC115705607/LOC115708064/LOC115708073/LOC115709638/LOC115709698/LOC115710101/LOC115710480/LOC115710877/LOC115710919/LOC115712548/LOC115713640/LOC115699417/LOC115702238/LOC115702361/LOC115705472/LOC115705471/LOC115703600/LOC115706092/LOC115707175/LOC115707758/LOC115707664/LOC115706733/LOC115705417/LOC115705524/LOC115704…	153
115	H3K4me3	GO:0009658	chloroplast organization	139/11786	158/15562	8.61e-05	0.00167374	0.00117456	LOC115702650/LOC115702831/LOC115702840/LOC115702934/LOC115714780/LOC115703174/LOC115713739/LOC115719777/LOC115721223/LOC115716371/LOC115702343/LOC115703656/LOC115703727/LOC115704378/LOC115706195/LOC115708785/LOC115708793/LOC115711190/LOC115713910/LOC115714206/LOC115714532/LOC115697431/LOC115701908/LOC115702350/LOC115707743/LOC115703617/LOC115706099/LOC115705033/LOC115703578/LOC115705187/LOC115704…	139
116	H3K4me3	GO:0044272	sulfur compound biosynthetic process	105/11786	117/15562	9.75e-05	0.0018782	0.00131804	LOC115702618/LOC115702630/LOC115702983/LOC115703014/LOC115703094/LOC115711364/LOC115715228/LOC115696485/LOC115694915/LOC115698051/LOC115696655/LOC115695062/LOC115703995/LOC115707000/LOC115705080/LOC115706332/LOC115705658/LOC115706703/LOC115706566/LOC115706479/LOC115705662/LOC115703573/LOC115708329/LOC115708323/LOC115704842/LOC115705155/LOC115706093/LOC115706293/LOC115707895/LOC115707018/LOC115707…	105
117	H3K4me3	GO:0031123	RNA 3'-end processing	62/11786	66/15562	9.85e-05	0.00188086	0.0013199	LOC115702617/LOC115704488/LOC115703071/LOC115707493/LOC115712297/LOC115712646/LOC115724500/LOC115699992/LOC115705454/LOC115705691/LOC115706052/LOC115705625/LOC115705730/LOC115708113/LOC115706636/LOC115707497/LOC115708743/LOC115709960/LOC115709390/LOC115710246/LOC115711551/LOC115711193/LOC115712412/LOC115713019/LOC115713457/LOC115711981/LOC115714094/LOC115717511/LOC115715834/LOC115718149/LOC115716…	62
118	H3K4me3	GO:0036293	response to decreased oxygen levels	49/11786	51/15562	0.000101656	0.00192542	0.00135118	LOC115708662/LOC115705664/LOC115705684/LOC115707488/LOC115706910/LOC115709817/LOC115710310/LOC115711619/LOC115697774/LOC115697874/LOC115704831/LOC115703568/LOC115707742/LOC115707594/LOC115706236/LOC115706239/LOC115707183/LOC115710324/LOC115708928/LOC115709090/LOC115713001/LOC115712801/LOC115712781/LOC115715124/LOC115712392/LOC115715205/LOC115714289/LOC115715197/LOC115716403/LOC115716738/LOC115717…	49
119	H3K4me3	GO:0006974	cellular response to DNA damage stimulus	352/11786	423/15562	0.000102619	0.00192734	0.00135252	LOC115702602/LOC115702671/LOC115703137/LOC115703016/LOC115704053/LOC115704434/LOC115703047/LOC115703218/LOC115703121/LOC115703167/LOC115703195/LOC115705387/LOC115705574/LOC115709200/LOC115719849/LOC115694915/LOC115695062/LOC115703953/LOC115703420/LOC115703544/LOC115705615/LOC115707998/LOC115708212/LOC115709802/LOC115710310/LOC115713359/LOC115697408/LOC115699428/LOC115700479/LOC115700865/LOC115696…	352
120	H3K4me3	GO:0006261	DNA-templated DNA replication	109/11786	122/15562	0.000113955	0.0021224	0.00148941	LOC115705574/LOC115709200/LOC115703080/LOC115703697/LOC115704772/LOC115704790/LOC115705372/LOC115707998/LOC115709665/LOC115713359/LOC115722563/LOC115699428/LOC115700312/LOC115701871/LOC115706290/LOC115706681/LOC115706762/LOC115706763/LOC115704979/LOC115704072/LOC115707602/LOC115704793/LOC115704735/LOC115707106/LOC115706429/LOC115705680/LOC115705756/LOC115705950/LOC115705989/LOC115708201/LOC115706…	109
121	H3K4me3	GO:1901990	regulation of mitotic cell cycle phase transition	48/11786	50/15562	0.000129398	0.00239011	0.00167727	LOC115702671/LOC115703082/LOC115708347/LOC115713754/LOC115699147/LOC115699428/LOC115700579/LOC115702316/LOC115707955/LOC115706082/LOC115705540/LOC115704754/LOC115704365/LOC115706898/LOC115707872/LOC115711362/LOC115709043/LOC115709353/LOC115715115/LOC115711949/LOC115714937/LOC115713293/LOC115714220/LOC115712237/LOC115712107/LOC115712943/LOC115715784/LOC115715625/LOC115715924/LOC115715575/LOC115721…	48
122	H3K4me3	GO:0009063	cellular amino acid catabolic process	72/11786	78/15562	0.000137158	0.00251269	0.00176329	LOC115702935/LOC115702968/LOC115713573/LOC115704012/LOC115707082/LOC115708896/LOC115699010/LOC115699125/LOC115705444/LOC115706279/LOC115706202/LOC115705119/LOC115706743/LOC115706744/LOC115706668/LOC115705451/LOC115705619/LOC115708195/LOC115705496/LOC115706405/LOC115707183/LOC115707738/LOC115711262/LOC115710187/LOC115710186/LOC115709862/LOC115709282/LOC115709383/LOC115709114/LOC115710211/LOC115712…	72
123	H3K4me3	GO:0018205	peptidyl-lysine modification	167/11786	193/15562	0.000139139	0.00252826	0.00177422	LOC115704488/LOC115702702/LOC115702708/LOC115702752/LOC115702766/LOC115702773/LOC115716842/LOC115702813/LOC115702872/LOC115703046/LOC115703121/LOC115707433/LOC115704855/LOC115706453/LOC115708212/LOC115709107/LOC115711075/LOC115711086/LOC115713717/LOC115713758/LOC115714021/LOC115714628/LOC115719082/LOC115724500/LOC115697752/LOC115698748/LOC115698826/LOC115699021/LOC115701440/LOC115705198/LOC115705…	167
124	H3K4me3	GO:0048193	Golgi vesicle transport	131/11786	149/15562	0.00014675	0.00264504	0.00185617	LOC115702618/LOC115702630/LOC115702727/LOC115702737/LOC115702753/LOC115702754/LOC115705037/LOC115703086/LOC115703087/LOC115703160/LOC115704956/LOC115705660/LOC115713633/LOC115702605/LOC115710763/LOC115715804/LOC115697109/LOC115699031/LOC115700291/LOC115700972/LOC115706048/LOC115705227/LOC115705393/LOC115707648/LOC115704658/LOC115708180/LOC115708162/LOC115706760/LOC115706419/LOC115705459/LOC115705…	131
125	H3K4me3	GO:0043543	protein acylation	112/11786	126/15562	0.000154788	0.0027676	0.00194218	LOC115704488/LOC115702642/LOC115702752/LOC115702766/LOC115702813/LOC115702872/LOC115703046/LOC115717286/LOC115703744/LOC115704855/LOC115708202/LOC115711075/LOC115711086/LOC115713717/LOC115713758/LOC115724500/LOC115698748/LOC115701440/LOC115705836/LOC115705510/LOC115705830/LOC115705986/LOC115707577/LOC115703955/LOC115706936/LOC115707764/LOC115706809/LOC115708159/LOC115705931/LOC115705954/LOC115706…	112
126	H3K4me3	GO:0000380	alternative mRNA splicing, via spliceosome	40/11786	41/15562	0.000156921	0.00278348	0.00195332	LOC115696283/LOC115696009/LOC115703796/LOC115712402/LOC115700176/LOC115706268/LOC115707685/LOC115705478/LOC115705553/LOC115705922/LOC115706160/LOC115706184/LOC115706600/LOC115705305/LOC115705238/LOC115710188/LOC115710249/LOC115710191/LOC115709457/LOC115713961/LOC115712289/LOC115714058/LOC115716841/LOC115716696/LOC115718181/LOC115716721/LOC115721436/LOC115720794/LOC115719369/LOC115719575/LOC115725…	40
127	H3K4me3	GO:0009100	glycoprotein metabolic process	144/11786	165/15562	0.000160118	0.00280879	0.00197108	LOC115702863/LOC115702925/LOC115702932/LOC115695222/LOC115705475/LOC115705498/LOC115709068/LOC115709580/LOC115709948/LOC115710680/LOC115710905/LOC115698949/LOC115702356/LOC115708063/LOC115708108/LOC115707544/LOC115707760/LOC115708200/LOC115707581/LOC115705153/LOC115705509/LOC115708322/LOC115704087/LOC115704435/LOC115704436/LOC115707073/LOC115705024/LOC115705818/LOC115705819/LOC115706546/LOC115707…	144
128	H3K4me3	GO:0072521	purine-containing compound metabolic process	200/11786	234/15562	0.000160862	0.00280879	0.00197108	LOC115702783/LOC115702801/LOC115702836/LOC115702850/LOC115703114/LOC115703131/LOC115703193/LOC115724952/LOC115703913/LOC115704378/LOC115704957/LOC115705607/LOC115708073/LOC115709638/LOC115709698/LOC115710101/LOC115710480/LOC115710877/LOC115710919/LOC115711259/LOC115711637/LOC115711722/LOC115712548/LOC115713640/LOC115714139/LOC115723768/LOC115698624/LOC115700647/LOC115701015/LOC115701945/LOC115702…	200
129	H3K4me3	GO:0006367	transcription initiation at RNA polymerase II promoter	47/11786	49/15562	0.00016459	0.00285162	0.00200113	LOC115702736/LOC115703047/LOC115710578/LOC115697659/LOC115701199/LOC115707790/LOC115708179/LOC115707202/LOC115706756/LOC115705576/LOC115706196/LOC115708197/LOC115707069/LOC115707206/LOC115707352/LOC115707373/LOC115707402/LOC115707539/LOC115709767/LOC115709819/LOC115709141/LOC115710313/LOC115709742/LOC115709913/LOC115714747/LOC115715157/LOC115713457/LOC115711981/LOC115714412/LOC115715637/LOC115716…	47
130	H3K4me3	GO:0045786	negative regulation of cell cycle	65/11786	70/15562	0.000182374	0.00313543	0.0022003	LOC115702671/LOC115702697/LOC115703082/LOC115703195/LOC115719849/LOC115723901/LOC115702797/LOC115705372/LOC115722563/LOC115699428/LOC115702316/LOC115705540/LOC115704754/LOC115704365/LOC115705989/LOC115707872/LOC115708656/LOC115709424/LOC115710062/LOC115711362/LOC115709686/LOC115709043/LOC115709354/LOC115715115/LOC115711949/LOC115714937/LOC115713293/LOC115712237/LOC115715173/LOC115714141/LOC115714…	65
131	H3K4me3	GO:0010038	response to metal ion	203/11786	238/15562	0.000186661	0.00318464	0.00223483	LOC115702620/LOC115702629/LOC115702853/LOC115702854/LOC115715948/LOC115702913/LOC115703137/LOC115723648/LOC115703228/LOC115702430/LOC115702336/LOC115703190/LOC115704166/LOC115707082/LOC115709724/LOC115710185/LOC115710310/LOC115710860/LOC115712056/LOC115712334/LOC115713640/LOC115713783/LOC115695461/LOC115697690/LOC115698731/LOC115699010/LOC115699837/LOC115700255/LOC115703671/LOC115705444/LOC115707…	203
132	H3K4me3	GO:0019693	ribose phosphate metabolic process	190/11786	222/15562	0.000198089	0.003354	0.00235368	LOC115702783/LOC115702801/LOC115702836/LOC115702850/LOC115703114/LOC115703131/LOC115724952/LOC115704378/LOC115704957/LOC115705607/LOC115708064/LOC115708073/LOC115709698/LOC115710101/LOC115710480/LOC115710877/LOC115710919/LOC115711259/LOC115711637/LOC115711722/LOC115712548/LOC115713640/LOC115714139/LOC115723768/LOC115700647/LOC115701015/LOC115701945/LOC115702002/LOC115702238/LOC115702361/LOC115706…	190
133	H3K4me3	GO:0001522	pseudouridine synthesis	39/11786	40/15562	0.00020265	0.00340543	0.00238978	LOC115702770/LOC115702975/LOC115703055/LOC115700804/LOC115710828/LOC115712383/LOC115722758/LOC115706746/LOC115704040/LOC115706207/LOC115708115/LOC115706058/LOC115705377/LOC115705943/LOC115707798/LOC115711398/LOC115709829/LOC115711406/LOC115711482/LOC115714335/LOC115714823/LOC115714284/LOC115712892/LOC115712869/LOC115716644/LOC115718435/LOC115719111/LOC115719556/LOC115719683/LOC115721120/LOC115720…	39
134	H3K4me3	GO:0001666	response to hypoxia	46/11786	48/15562	0.000209194	0.00348917	0.00244854	LOC115708662/LOC115705664/LOC115705684/LOC115707488/LOC115706910/LOC115709817/LOC115710310/LOC115697774/LOC115697874/LOC115704831/LOC115703568/LOC115707742/LOC115707594/LOC115706236/LOC115706239/LOC115707183/LOC115710324/LOC115708928/LOC115709090/LOC115713001/LOC115712801/LOC115712781/LOC115715124/LOC115712392/LOC115715205/LOC115714289/LOC115715197/LOC115716403/LOC115716738/LOC115717122/LOC115721…	46
135	H3K4me3	GO:0032787	monocarboxylic acid metabolic process	397/11786	482/15562	0.00023091	0.00381451	0.00267685	LOC115702591/LOC115702672/LOC115702927/LOC115702934/LOC115723648/LOC115703163/LOC115703179/LOC115703195/LOC115702464/LOC115703234/LOC115722899/LOC115710077/LOC115713573/LOC115723066/LOC115695922/LOC115695831/LOC115703721/LOC115704142/LOC115704378/LOC115705564/LOC115705664/LOC115705684/LOC115707488/LOC115705741/LOC115706299/LOC115706428/LOC115709512/LOC115710665/LOC115710753/LOC115710857/LOC115711…	397
136	H3K4me3	GO:0051253	negative regulation of RNA metabolic process	159/11786	184/15562	0.000232114	0.00381451	0.00267685	LOC115702592/LOC115704488/LOC115702766/LOC115702813/LOC115724257/LOC115703078/LOC115707433/LOC115716590/LOC115720249/LOC115694702/LOC115695222/LOC115702759/LOC115702778/LOC115704745/LOC115704249/LOC115706453/LOC115709095/LOC115710310/LOC115711075/LOC115711694/LOC115712195/LOC115714021/LOC115697325/LOC115698748/LOC115699021/LOC115700469/LOC115700622/LOC115701521/LOC115701871/LOC115702261/LOC115705…	159
137	H3K4me3	GO:0007010	cytoskeleton organization	197/11786	231/15562	0.00023551	0.00384179	0.002696	LOC115702674/LOC115702711/LOC115702734/LOC115702733/LOC115702784/LOC115702799/LOC115702907/LOC115703222/LOC115705485/LOC115699804/LOC115702427/LOC115704651/LOC115704802/LOC115706112/LOC115709986/LOC115712112/LOC115712375/LOC115712383/LOC115714593/LOC115714604/LOC115718923/LOC115724500/LOC115698324/LOC115698652/LOC115699125/LOC115699845/LOC115702021/LOC115703663/LOC115703668/LOC115704901/LOC115706…	197
138	H3K4me3	GO:0070897	transcription preinitiation complex assembly	30/11786	30/15562	0.000237212	0.00384179	0.002696	LOC115697659/LOC115701199/LOC115707202/LOC115706196/LOC115707024/LOC115707069/LOC115707206/LOC115707402/LOC115707539/LOC115709767/LOC115710313/LOC115709742/LOC115709913/LOC115710074/LOC115714747/LOC115714412/LOC115717035/LOC115716110/LOC115719006/LOC115720806/LOC115719601/LOC115718997/LOC115720793/LOC115719076/LOC115718647/LOC115722931/LOC115724516/LOC115725232/LOC115697803/LOC115698688	30
139	H3K4me3	GO:0070085	glycosylation	163/11786	189/15562	0.000242377	0.00389722	0.00273489	LOC115702818/LOC115702834/LOC115702863/LOC115702925/LOC115702932/LOC115704043/LOC115695222/LOC115705475/LOC115705498/LOC115709068/LOC115709176/LOC115709580/LOC115709948/LOC115710680/LOC115710905/LOC115713817/LOC115698949/LOC115702356/LOC115708108/LOC115707544/LOC115707760/LOC115708200/LOC115707581/LOC115705153/LOC115705509/LOC115705095/LOC115706356/LOC115708322/LOC115704087/LOC115704435/LOC115704…	163
140	H3K4me3	GO:0006289	nucleotide-excision repair	45/11786	47/15562	0.000265677	0.00424134	0.00297638	LOC115703047/LOC115703420/LOC115703544/LOC115709802/LOC115707602/LOC115705507/LOC115705579/LOC115705676/LOC115708197/LOC115707872/LOC115707874/LOC115710048/LOC115709669/LOC115710251/LOC115710081/LOC115711515/LOC115713928/LOC115712618/LOC115712866/LOC115717036/LOC115715637/LOC115716897/LOC115716894/LOC115719330/LOC115718408/LOC115720820/LOC115720780/LOC115719699/LOC115723076/LOC115723156/LOC115725…	45
141	H3K4me3	GO:0032984	protein-containing complex disassembly	63/11786	68/15562	0.000276696	0.0043588	0.0030588	LOC115702674/LOC115702784/LOC115702799/LOC115713003/LOC115716371/LOC115722977/LOC115704651/LOC115712375/LOC115712383/LOC115724500/LOC115699818/LOC115704024/LOC115706539/LOC115703595/LOC115709618/LOC115709883/LOC115711537/LOC115711565/LOC115711136/LOC115709394/LOC115709962/LOC115710014/LOC115709152/LOC115712587/LOC115712807/LOC115714084/LOC115714546/LOC115714393/LOC115713918/LOC115714208/LOC115717…	63
142	H3K4me3	GO:0016053	organic acid biosynthetic process	395/11786	480/15562	0.000276935	0.0043588	0.0030588	LOC115702620/LOC115702618/LOC115702629/LOC115702630/LOC115702672/LOC115702927/LOC115702934/LOC115723648/LOC115702983/LOC115702972/LOC115703006/LOC115703014/LOC115703195/LOC115703222/LOC115703228/LOC115703234/LOC115722899/LOC115704443/LOC115715228/LOC115718543/LOC115695922/LOC115695831/LOC115703738/LOC115703995/LOC115704142/LOC115704241/LOC115705664/LOC115705684/LOC115707488/LOC115706017/LOC115706…	395
143	H3K4me3	GO:0000725	recombinational repair	79/11786	87/15562	0.000281929	0.00440285	0.00308972	LOC115703137/LOC115704434/LOC115703167/LOC115705574/LOC115706647/LOC115706157/LOC115706037/LOC115704979/LOC115705230/LOC115707602/LOC115704793/LOC115704735/LOC115707106/LOC115707892/LOC115705602/LOC115705989/LOC115707562/LOC115704581/LOC115707567/LOC115705247/LOC115707872/LOC115708656/LOC115711251/LOC115709787/LOC115708746/LOC115708823/LOC115710251/LOC115709568/LOC115715115/LOC115711969/LOC115715…	79
144	H3K4me3	GO:0000226	microtubule cytoskeleton organization	113/11786	128/15562	0.000283673	0.00440285	0.00308972	LOC115702711/LOC115702734/LOC115702733/LOC115702907/LOC115703222/LOC115699804/LOC115709986/LOC115712112/LOC115714593/LOC115714604/LOC115718923/LOC115698324/LOC115698652/LOC115699125/LOC115699845/LOC115703663/LOC115703668/LOC115705653/LOC115707516/LOC115705831/LOC115704349/LOC115705671/LOC115705841/LOC115705963/LOC115705929/LOC115706042/LOC115706663/LOC115708218/LOC115706373/LOC115707446/LOC115707…	113
145	H3K4me3	GO:0031324	negative regulation of cellular metabolic process	330/11786	398/15562	0.00029062	0.00447956	0.00314355	LOC115702592/LOC115704488/LOC115702736/LOC115702766/LOC115701559/LOC115702795/LOC115702809/LOC115702813/LOC115724257/LOC115702697/LOC115703000/LOC115698890/LOC115703078/LOC115722899/LOC115705387/LOC115705832/LOC115707433/LOC115715318/LOC115716590/LOC115720249/LOC115694702/LOC115695222/LOC115702759/LOC115702778/LOC115703071/LOC115703697/LOC115704745/LOC115704241/LOC115704249/LOC115705210/LOC115702…	330
146	H3K4me3	GO:0061025	membrane fusion	57/11786	61/15562	0.00029289	0.00448363	0.00314641	LOC115704030/LOC115708838/LOC115699031/LOC115702171/LOC115708180/LOC115708162/LOC115707485/LOC115708096/LOC115707687/LOC115707208/LOC115706451/LOC115706475/LOC115706477/LOC115706885/LOC115706947/LOC115707091/LOC115707137/LOC115707408/LOC115707542/LOC115707910/LOC115709824/LOC115714649/LOC115714478/LOC115717582/LOC115716740/LOC115716668/LOC115716424/LOC115715695/LOC115715593/LOC115716110/LOC115719…	57
147	H3K4me3	GO:0046394	carboxylic acid biosynthetic process	394/11786	479/15562	0.000303085	0.00460814	0.00323378	LOC115702620/LOC115702618/LOC115702629/LOC115702630/LOC115702672/LOC115702927/LOC115702934/LOC115723648/LOC115702983/LOC115702972/LOC115703006/LOC115703014/LOC115703195/LOC115703222/LOC115703228/LOC115703234/LOC115722899/LOC115704443/LOC115715228/LOC115718543/LOC115695922/LOC115695831/LOC115703738/LOC115703995/LOC115704142/LOC115704241/LOC115705664/LOC115705684/LOC115707488/LOC115706017/LOC115706…	394
148	H3K4me3	GO:0098542	defense response to other organism	405/11786	493/15562	0.000309606	0.00467547	0.00328103	LOC115702597/LOC115702681/LOC115702684/LOC115702764/LOC115702780/LOC115702804/LOC115702813/LOC115702822/LOC115702823/LOC115702829/LOC115702830/LOC115702961/LOC115702981/LOC115704434/LOC115708662/LOC115703179/LOC115703193/LOC115703234/LOC115703926/LOC115704560/LOC115704466/LOC115722899/LOC115715228/LOC115716590/LOC115717286/LOC115702566/LOC115695922/LOC115695831/LOC115705823/LOC115702336/LOC115702…	405
149	H3K4me3	GO:0009101	glycoprotein biosynthetic process	135/11786	155/15562	0.000313824	0.00470735	0.00330341	LOC115702863/LOC115702925/LOC115702932/LOC115695222/LOC115705475/LOC115705498/LOC115709068/LOC115709580/LOC115709948/LOC115710680/LOC115710905/LOC115698949/LOC115702356/LOC115708108/LOC115707544/LOC115707760/LOC115708200/LOC115707581/LOC115705153/LOC115705509/LOC115708322/LOC115704087/LOC115704435/LOC115704436/LOC115707073/LOC115705024/LOC115706546/LOC115707935/LOC115706952/LOC115707203/LOC115707…	135
150	H3K4me3	GO:0072522	purine-containing compound biosynthetic process	93/11786	104/15562	0.000336904	0.00499386	0.00350447	LOC115702850/LOC115724952/LOC115704957/LOC115705607/LOC115708073/LOC115709698/LOC115710101/LOC115710480/LOC115710919/LOC115712548/LOC115713640/LOC115698624/LOC115702238/LOC115702361/LOC115702364/LOC115706092/LOC115707175/LOC115707758/LOC115707664/LOC115705417/LOC115708323/LOC115704842/LOC115705183/LOC115708106/LOC115707930/LOC115705477/LOC115706093/LOC115707018/LOC115707116/LOC115707550/LOC115707…	93
151	H3K4me3	GO:0000381	regulation of alternative mRNA splicing, via spliceosome	37/11786	38/15562	0.000337393	0.00499386	0.00350447	LOC115696283/LOC115696009/LOC115712402/LOC115700176/LOC115706268/LOC115705478/LOC115705553/LOC115705922/LOC115706160/LOC115706184/LOC115706600/LOC115705305/LOC115710188/LOC115710249/LOC115710191/LOC115709457/LOC115713961/LOC115712289/LOC115714058/LOC115716841/LOC115716696/LOC115718181/LOC115716721/LOC115721436/LOC115720794/LOC115719369/LOC115719575/LOC115725209/LOC115725126/LOC115725578/LOC115698…	37
152	H3K4me3	GO:0002181	cytoplasmic translation	83/11786	92/15562	0.000344685	0.00506823	0.00355665	LOC115702845/LOC115706780/LOC115706765/LOC115697809/LOC115706062/LOC115707808/LOC115705126/LOC115706118/LOC115706080/LOC115705447/LOC115707422/LOC115705054/LOC115704972/LOC115705881/LOC115705178/LOC115707065/LOC115708199/LOC115706323/LOC115706337/LOC115706426/LOC115707057/LOC115707151/LOC115707624/LOC115707861/LOC115707989/LOC115708045/LOC115710303/LOC115711486/LOC115710090/LOC115710091/LOC115709…	83
153	H3K4me3	GO:0008652	cellular amino acid biosynthetic process	177/11786	207/15562	0.000359494	0.00521214	0.00365764	LOC115702620/LOC115702618/LOC115702629/LOC115702630/LOC115702672/LOC115702983/LOC115702972/LOC115703006/LOC115703014/LOC115703195/LOC115703222/LOC115703228/LOC115715228/LOC115718543/LOC115703995/LOC115704142/LOC115706017/LOC115706057/LOC115709638/LOC115710665/LOC115710723/LOC115711146/LOC115712735/LOC115713163/LOC115697820/LOC115699010/LOC115699522/LOC115696400/LOC115705168/LOC115706187/LOC115705…	177
154	H3K4me3	GO:0006486	protein glycosylation	134/11786	154/15562	0.000363406	0.00521214	0.00365764	LOC115702863/LOC115702925/LOC115702932/LOC115695222/LOC115705475/LOC115705498/LOC115709068/LOC115709580/LOC115709948/LOC115710680/LOC115710905/LOC115698949/LOC115702356/LOC115708108/LOC115707544/LOC115707760/LOC115708200/LOC115707581/LOC115705153/LOC115705509/LOC115708322/LOC115704087/LOC115704435/LOC115704436/LOC115707073/LOC115705024/LOC115706546/LOC115707935/LOC115706952/LOC115707203/LOC115707…	134
155	H3K4me3	GO:0043413	macromolecule glycosylation	134/11786	154/15562	0.000363406	0.00521214	0.00365764	LOC115702863/LOC115702925/LOC115702932/LOC115695222/LOC115705475/LOC115705498/LOC115709068/LOC115709580/LOC115709948/LOC115710680/LOC115710905/LOC115698949/LOC115702356/LOC115708108/LOC115707544/LOC115707760/LOC115708200/LOC115707581/LOC115705153/LOC115705509/LOC115708322/LOC115704087/LOC115704435/LOC115704436/LOC115707073/LOC115705024/LOC115706546/LOC115707935/LOC115706952/LOC115707203/LOC115707…	134
156	H3K4me3	GO:0031146	SCF-dependent proteasomal ubiquitin-dependent protein catabolic process	50/11786	53/15562	0.000366417	0.00521214	0.00365764	LOC115702794/LOC115721901/LOC115700096/LOC115703805/LOC115706219/LOC115711205/LOC115720532/LOC115721654/LOC115723577/LOC115725385/LOC115704034/LOC115708308/LOC115703747/LOC115704852/LOC115704948/LOC115705507/LOC115704102/LOC115706906/LOC115707886/LOC115708112/LOC115707898/LOC115711129/LOC115711274/LOC115712497/LOC115712738/LOC115714112/LOC115712569/LOC115714373/LOC115715069/LOC115717288/LOC115716…	50
157	H3K4me3	GO:1902679	negative regulation of RNA biosynthetic process	147/11786	170/15562	0.000370002	0.00521214	0.00365764	LOC115702592/LOC115704488/LOC115702766/LOC115702813/LOC115724257/LOC115703078/LOC115707433/LOC115716590/LOC115720249/LOC115694702/LOC115695222/LOC115702759/LOC115702778/LOC115704745/LOC115706453/LOC115709095/LOC115710310/LOC115711075/LOC115711694/LOC115712195/LOC115714021/LOC115697325/LOC115698748/LOC115699021/LOC115700469/LOC115700622/LOC115701521/LOC115701871/LOC115702261/LOC115705510/LOC115704…	147
158	H3K4me3	GO:1903507	negative regulation of nucleic acid-templated transcription	147/11786	170/15562	0.000370002	0.00521214	0.00365764	LOC115702592/LOC115704488/LOC115702766/LOC115702813/LOC115724257/LOC115703078/LOC115707433/LOC115716590/LOC115720249/LOC115694702/LOC115695222/LOC115702759/LOC115702778/LOC115704745/LOC115706453/LOC115709095/LOC115710310/LOC115711075/LOC115711694/LOC115712195/LOC115714021/LOC115697325/LOC115698748/LOC115699021/LOC115700469/LOC115700622/LOC115701521/LOC115701871/LOC115702261/LOC115705510/LOC115704…	147
159	H3K4me3	GO:0046390	ribose phosphate biosynthetic process	102/11786	115/15562	0.000370797	0.00521214	0.00365764	LOC115702850/LOC115724952/LOC115704957/LOC115705607/LOC115708064/LOC115708073/LOC115709698/LOC115710101/LOC115710480/LOC115710877/LOC115710919/LOC115712548/LOC115713640/LOC115702238/LOC115702361/LOC115706092/LOC115707175/LOC115707758/LOC115707664/LOC115705417/LOC115705524/LOC115708323/LOC115704842/LOC115705183/LOC115708106/LOC115707930/LOC115705477/LOC115706093/LOC115707018/LOC115707116/LOC115707…	102
160	H3K4me3	GO:1901606	alpha-amino acid catabolic process	67/11786	73/15562	0.000374925	0.00523724	0.00367525	LOC115702935/LOC115702968/LOC115713573/LOC115704012/LOC115707082/LOC115708896/LOC115699010/LOC115699125/LOC115705444/LOC115706279/LOC115706202/LOC115705119/LOC115706743/LOC115706744/LOC115706668/LOC115705451/LOC115705619/LOC115708195/LOC115705496/LOC115706405/LOC115707183/LOC115707738/LOC115711262/LOC115710187/LOC115710186/LOC115709862/LOC115709282/LOC115709383/LOC115709114/LOC115710211/LOC115712…	67
161	H3K4me3	GO:0045892	negative regulation of DNA-templated transcription	138/11786	159/15562	0.000385218	0.00534759	0.00375269	LOC115702592/LOC115704488/LOC115702813/LOC115724257/LOC115703078/LOC115707433/LOC115716590/LOC115720249/LOC115702759/LOC115702778/LOC115704745/LOC115706453/LOC115709095/LOC115710310/LOC115711694/LOC115712195/LOC115714021/LOC115697325/LOC115698748/LOC115699021/LOC115700469/LOC115700622/LOC115701521/LOC115701871/LOC115702261/LOC115705510/LOC115704901/LOC115705128/LOC115706762/LOC115706763/LOC115705…	138
162	H3K4me3	GO:1901361	organic cyclic compound catabolic process	221/11786	262/15562	0.000409915	0.00564259	0.00395971	LOC115702736/LOC115701559/LOC115702795/LOC115702809/LOC115702924/LOC115702968/LOC115703193/LOC115703195/LOC115696485/LOC115694915/LOC115697784/LOC115696655/LOC115695062/LOC115697868/LOC115703071/LOC115703796/LOC115704249/LOC115709368/LOC115697431/LOC115695344/LOC115699125/LOC115705519/LOC115705686/LOC115705119/LOC115706264/LOC115708282/LOC115706748/LOC115708325/LOC115706668/LOC115705197/LOC115706…	221
163	H3K4me3	GO:0030150	protein import into mitochondrial matrix	28/11786	28/15562	0.000414042	0.00564259	0.00395971	LOC115702879/LOC115702892/LOC115708514/LOC115713121/LOC115705543/LOC115708161/LOC115706827/LOC115707514/LOC115711532/LOC115711406/LOC115710058/LOC115713032/LOC115713033/LOC115715088/LOC115712058/LOC115712002/LOC115712702/LOC115714264/LOC115719112/LOC115721380/LOC115722280/LOC115722732/LOC115721800/LOC115722613/LOC115694747/LOC115725737/LOC115725191/LOC115699739	28
164	H3K4me3	GO:0045143	homologous chromosome segregation	28/11786	28/15562	0.000414042	0.00564259	0.00395971	LOC115720388/LOC115709986/LOC115699159/LOC115706800/LOC115707602/LOC115706429/LOC115705680/LOC115708236/LOC115703644/LOC115704718/LOC115704124/LOC115705259/LOC115708656/LOC115710062/LOC115709720/LOC115712153/LOC115716070/LOC115716370/LOC115722027/LOC115722511/LOC115721811/LOC115723969/LOC115724758/LOC115724714/LOC115695791/LOC115701214/LOC115701370/LOC115702015	28
165	H3K4me3	GO:0080134	regulation of response to stress	184/11786	216/15562	0.000425347	0.00575501	0.0040386	LOC115702671/LOC115702773/LOC115716842/LOC115703195/LOC115722899/LOC115710935/LOC115703620/LOC115705210/LOC115705615/LOC115707089/LOC115707998/LOC115711315/LOC115711709/LOC115717510/LOC115722139/LOC115722818/LOC115722970/LOC115697056/LOC115699142/LOC115699277/LOC115699852/LOC115700255/LOC115705628/LOC115707283/LOC115705509/LOC115705161/LOC115706817/LOC115705547/LOC115705569/LOC115705155/LOC115706…	184
166	H3K4me3	GO:0048024	regulation of mRNA splicing, via spliceosome	43/11786	45/15562	0.000427441	0.00575501	0.0040386	LOC115702792/LOC115715318/LOC115696283/LOC115696009/LOC115712402/LOC115700176/LOC115706268/LOC115705478/LOC115705553/LOC115705922/LOC115706160/LOC115706184/LOC115706600/LOC115705305/LOC115710188/LOC115710249/LOC115710191/LOC115709457/LOC115713797/LOC115713961/LOC115712289/LOC115714058/LOC115714428/LOC115716841/LOC115716696/LOC115718181/LOC115716272/LOC115716721/LOC115721436/LOC115720794/LOC115718…	43
167	H3K4me3	GO:1901607	alpha-amino acid biosynthetic process	150/11786	174/15562	0.000443753	0.00593884	0.00416761	LOC115702620/LOC115702618/LOC115702629/LOC115702630/LOC115702983/LOC115702972/LOC115703006/LOC115703014/LOC115703195/LOC115703222/LOC115703228/LOC115715228/LOC115718543/LOC115703995/LOC115704142/LOC115706017/LOC115706057/LOC115710723/LOC115711146/LOC115712735/LOC115713163/LOC115699010/LOC115696400/LOC115705168/LOC115706187/LOC115705837/LOC115706734/LOC115706735/LOC115706332/LOC115705658/LOC115706…	150
168	H3K4me3	GO:0070585	protein localization to mitochondrion	55/11786	59/15562	0.000449888	0.00594971	0.00417523	LOC115702879/LOC115702892/LOC115702923/LOC115699346/LOC115708514/LOC115713121/LOC115705543/LOC115708272/LOC115708161/LOC115705865/LOC115704985/LOC115706722/LOC115706827/LOC115707514/LOC115707559/LOC115711532/LOC115711406/LOC115710058/LOC115714976/LOC115713032/LOC115713033/LOC115713044/LOC115715088/LOC115712058/LOC115712002/LOC115712702/LOC115714264/LOC115716627/LOC115715734/LOC115717977/LOC115716…	55
169	H3K4me3	GO:0072655	establishment of protein localization to mitochondrion	55/11786	59/15562	0.000449888	0.00594971	0.00417523	LOC115702879/LOC115702892/LOC115702923/LOC115699346/LOC115708514/LOC115713121/LOC115705543/LOC115708272/LOC115708161/LOC115705865/LOC115704985/LOC115706722/LOC115706827/LOC115707514/LOC115707559/LOC115711532/LOC115711406/LOC115710058/LOC115714976/LOC115713032/LOC115713033/LOC115713044/LOC115715088/LOC115712058/LOC115712002/LOC115712702/LOC115714264/LOC115716627/LOC115715734/LOC115717977/LOC115716…	55
170	H3K4me3	GO:0006163	purine nucleotide metabolic process	179/11786	210/15562	0.000473691	0.00622764	0.00437027	LOC115702783/LOC115702801/LOC115702836/LOC115702850/LOC115703114/LOC115703131/LOC115703193/LOC115724952/LOC115704378/LOC115704957/LOC115705607/LOC115708073/LOC115709638/LOC115709698/LOC115710101/LOC115710480/LOC115710877/LOC115710919/LOC115711259/LOC115711637/LOC115711722/LOC115712548/LOC115713640/LOC115714139/LOC115723768/LOC115700647/LOC115701015/LOC115701945/LOC115702002/LOC115702238/LOC115702…	179
171	H3K4me3	GO:0009259	ribonucleotide metabolic process	183/11786	215/15562	0.000481888	0.00629836	0.0044199	LOC115702783/LOC115702801/LOC115702836/LOC115702850/LOC115703114/LOC115703131/LOC115724952/LOC115704378/LOC115704957/LOC115705607/LOC115708064/LOC115708073/LOC115709698/LOC115710101/LOC115710480/LOC115710877/LOC115711259/LOC115711637/LOC115711722/LOC115712548/LOC115713640/LOC115714139/LOC115723768/LOC115700647/LOC115701015/LOC115701945/LOC115702002/LOC115702238/LOC115702361/LOC115706301/LOC115705…	183
172	H3K4me3	GO:0090174	organelle membrane fusion	42/11786	44/15562	0.000541461	0.00703585	0.00493744	LOC115704030/LOC115708838/LOC115699031/LOC115702171/LOC115708180/LOC115708162/LOC115707485/LOC115708096/LOC115707687/LOC115706451/LOC115706475/LOC115706477/LOC115706885/LOC115706947/LOC115707137/LOC115707542/LOC115707910/LOC115714478/LOC115717582/LOC115716740/LOC115716668/LOC115716424/LOC115715593/LOC115716110/LOC115719647/LOC115718523/LOC115722428/LOC115724067/LOC115723463/LOC115722780/LOC115723…	42
173	H3K4me3	GO:0048284	organelle fusion	65/11786	71/15562	0.000556455	0.00718888	0.00504483	LOC115704030/LOC115708838/LOC115714167/LOC115699031/LOC115702171/LOC115707804/LOC115707220/LOC115706608/LOC115708180/LOC115708162/LOC115704008/LOC115707485/LOC115708096/LOC115707687/LOC115706451/LOC115706475/LOC115706477/LOC115706885/LOC115706947/LOC115707137/LOC115707542/LOC115707910/LOC115710047/LOC115709646/LOC115709404/LOC115710026/LOC115711922/LOC115714154/LOC115714478/LOC115712892/LOC115717…	65
174	H3K4me3	GO:0006281	DNA repair	323/11786	391/15562	0.000570065	0.00732149	0.00513789	LOC115702602/LOC115702671/LOC115703137/LOC115703016/LOC115704053/LOC115704434/LOC115703047/LOC115703218/LOC115703121/LOC115703167/LOC115705387/LOC115705574/LOC115709200/LOC115694915/LOC115695062/LOC115703953/LOC115703420/LOC115703544/LOC115705615/LOC115707998/LOC115708212/LOC115709802/LOC115713359/LOC115697408/LOC115700479/LOC115700865/LOC115696675/LOC115702316/LOC115697014/LOC115705836/LOC115706…	323
175	H3K4me3	GO:0043484	regulation of RNA splicing	48/11786	51/15562	0.000573271	0.00732149	0.00513789	LOC115702792/LOC115699128/LOC115715318/LOC115696283/LOC115696009/LOC115712402/LOC115700176/LOC115706268/LOC115705478/LOC115705553/LOC115705922/LOC115706160/LOC115706184/LOC115706600/LOC115705305/LOC115709173/LOC115710188/LOC115710249/LOC115710191/LOC115709457/LOC115709944/LOC115713797/LOC115713961/LOC115712289/LOC115714058/LOC115714428/LOC115716841/LOC115716696/LOC115718181/LOC115716272/LOC115716…	48
176	H3K4me3	GO:0006473	protein acetylation	85/11786	95/15562	0.000581325	0.00738216	0.00518046	LOC115704488/LOC115702752/LOC115702766/LOC115702813/LOC115702872/LOC115703046/LOC115703744/LOC115704855/LOC115711075/LOC115711086/LOC115713717/LOC115713758/LOC115724500/LOC115698748/LOC115701440/LOC115705510/LOC115705830/LOC115705986/LOC115706936/LOC115706809/LOC115705931/LOC115706141/LOC115706513/LOC115706847/LOC115706945/LOC115707295/LOC115705251/LOC115708042/LOC115708058/LOC115709349/LOC115710…	85
177	H3K4me3	GO:0006790	sulfur compound metabolic process	237/11786	283/15562	0.000633782	0.00800284	0.00561603	LOC115702618/LOC115702630/LOC115702783/LOC115702801/LOC115702896/LOC115702924/LOC115702983/LOC115703014/LOC115703094/LOC115708837/LOC115710389/LOC115711364/LOC115713573/LOC115715228/LOC115696485/LOC115694915/LOC115698051/LOC115696655/LOC115695062/LOC115703995/LOC115707000/LOC115709401/LOC115709427/LOC115710018/LOC115711694/LOC115711722/LOC115712842/LOC115699010/LOC115699125/LOC115700246/LOC115700…	237
178	H3K4me3	GO:0010015	root morphogenesis	130/11786	150/15562	0.000647652	0.00813204	0.00570669	LOC115702611/LOC115702773/LOC115716842/LOC115703054/LOC115703151/LOC115703179/LOC115721901/LOC115702461/LOC115710554/LOC115712694/LOC115713424/LOC115697219/LOC115706462/LOC115706637/LOC115707648/LOC115704658/LOC115706187/LOC115705837/LOC115706681/LOC115705207/LOC115706751/LOC115706082/LOC115705617/LOC115704458/LOC115704245/LOC115704349/LOC115705681/LOC115704856/LOC115708317/LOC115706097/LOC115706…	130
179	H3K4me3	GO:0006400	tRNA modification	89/11786	100/15562	0.000667866	0.00830294	0.00582662	LOC115703081/LOC115701640/LOC115703284/LOC115703913/LOC115710828/LOC115712383/LOC115699663/LOC115705236/LOC115707790/LOC115708179/LOC115705537/LOC115704040/LOC115706208/LOC115707541/LOC115708115/LOC115706059/LOC115707146/LOC115707800/LOC115707168/LOC115708129/LOC115707270/LOC115707550/LOC115707586/LOC115710303/LOC115710710/LOC115709865/LOC115711398/LOC115708829/LOC115711640/LOC115710263/LOC115710…	89
180	H3K4me3	GO:0006401	RNA catabolic process	121/11786	139/15562	0.000668693	0.00830294	0.00582662	LOC115702736/LOC115701559/LOC115702795/LOC115702809/LOC115703195/LOC115696485/LOC115694915/LOC115697784/LOC115696655/LOC115695062/LOC115697868/LOC115703071/LOC115703796/LOC115704249/LOC115709368/LOC115695344/LOC115706264/LOC115706748/LOC115705197/LOC115706055/LOC115706139/LOC115708273/LOC115705405/LOC115708306/LOC115705625/LOC115705767/LOC115708113/LOC115705942/LOC115707364/LOC115707118/LOC115707…	121
181	H3K4me3	GO:0072527	pyrimidine-containing compound metabolic process	64/11786	70/15562	0.000676766	0.00835675	0.00586439	LOC115703157/LOC115709998/LOC115696485/LOC115694915/LOC115698051/LOC115696655/LOC115695062/LOC115708064/LOC115710101/LOC115710877/LOC115703600/LOC115706733/LOC115706703/LOC115705524/LOC115705713/LOC115704902/LOC115705873/LOC115707803/LOC115707217/LOC115705751/LOC115707173/LOC115707116/LOC115707375/LOC115704571/LOC115709556/LOC115710333/LOC115709025/LOC115709908/LOC115709893/LOC115711604/LOC115714…	64
182	H3K4me3	GO:0046835	carbohydrate phosphorylation	41/11786	43/15562	0.000685261	0.00841516	0.00590537	LOC115695287/LOC115709914/LOC115711637/LOC115700263/LOC115701945/LOC115707743/LOC115703617/LOC115705825/LOC115706706/LOC115707188/LOC115707400/LOC115707547/LOC115707679/LOC115709262/LOC115710566/LOC115714158/LOC115712013/LOC115715147/LOC115717441/LOC115717182/LOC115716775/LOC115717236/LOC115716459/LOC115721106/LOC115718791/LOC115720624/LOC115723314/LOC115722867/LOC115722918/LOC115723147/LOC115722…	41
183	H3K4me3	GO:0033044	regulation of chromosome organization	79/11786	88/15562	0.000707167	0.00850043	0.00596522	LOC115703082/LOC115703121/LOC115704038/LOC115697752/LOC115699147/LOC115705198/LOC115705997/LOC115706060/LOC115707955/LOC115706082/LOC115707487/LOC115707578/LOC115705214/LOC115705155/LOC115704754/LOC115704365/LOC115706898/LOC115707295/LOC115705247/LOC115711362/LOC115708673/LOC115709098/LOC115710221/LOC115709770/LOC115709746/LOC115709353/LOC115709581/LOC115714491/LOC115711949/LOC115713293/LOC115712…	79
184	H3K4me3	GO:0070925	organelle assembly	138/11786	160/15562	0.000709691	0.00850043	0.00596522	LOC115702734/LOC115702733/LOC115702907/LOC115710511/LOC115702566/LOC115697784/LOC115697868/LOC115699804/LOC115708919/LOC115709368/LOC115714343/LOC115698624/LOC115699845/LOC115705545/LOC115703830/LOC115703663/LOC115708353/LOC115708213/LOC115703668/LOC115705126/LOC115705011/LOC115705197/LOC115706595/LOC115707731/LOC115703901/LOC115707381/LOC115708260/LOC115704888/LOC115706458/LOC115706671/LOC115706…	138
185	H3K4me3	GO:0009260	ribonucleotide biosynthetic process	98/11786	111/15562	0.000712147	0.00850043	0.00596522	LOC115702850/LOC115724952/LOC115704957/LOC115705607/LOC115708064/LOC115708073/LOC115709698/LOC115710101/LOC115710480/LOC115710877/LOC115712548/LOC115713640/LOC115702238/LOC115702361/LOC115706092/LOC115707175/LOC115707758/LOC115707664/LOC115705417/LOC115705524/LOC115708323/LOC115704842/LOC115705183/LOC115708106/LOC115707930/LOC115705477/LOC115706093/LOC115707018/LOC115707116/LOC115707550/LOC115707…	98
186	H3K4me3	GO:0009072	aromatic amino acid family metabolic process	74/11786	82/15562	0.000712194	0.00850043	0.00596522	LOC115702672/LOC115702968/LOC115706017/LOC115706057/LOC115710665/LOC115699125/LOC115699522/LOC115705119/LOC115706187/LOC115705837/LOC115706741/LOC115706668/LOC115703598/LOC115705595/LOC115705599/LOC115706405/LOC115707802/LOC115707881/LOC115708000/LOC115709272/LOC115711262/LOC115710187/LOC115710186/LOC115709862/LOC115709912/LOC115709282/LOC115709383/LOC115711577/LOC115714384/LOC115715054/LOC115715…	74
187	H3K4me3	GO:0048528	post-embryonic root development	74/11786	82/15562	0.000712194	0.00850043	0.00596522	LOC115703151/LOC115703179/LOC115717286/LOC115721901/LOC115710554/LOC115713424/LOC115697219/LOC115707648/LOC115704658/LOC115703789/LOC115706187/LOC115705837/LOC115706751/LOC115705617/LOC115705229/LOC115704458/LOC115705709/LOC115704245/LOC115706236/LOC115705047/LOC115711508/LOC115709259/LOC115711475/LOC115710039/LOC115710038/LOC115709566/LOC115712551/LOC115712760/LOC115712109/LOC115712210/LOC115712…	74
188	H3K4me3	GO:0034404	nucleobase-containing small molecule biosynthetic process	34/11786	35/15562	0.000721427	0.00850043	0.00596522	LOC115703193/LOC115710101/LOC115712548/LOC115713640/LOC115698624/LOC115705417/LOC115705497/LOC115707116/LOC115707697/LOC115704624/LOC115710333/LOC115712545/LOC115712679/LOC115715167/LOC115712043/LOC115714036/LOC115716800/LOC115716958/LOC115716323/LOC115716183/LOC115724129/LOC115724184/LOC115721913/LOC115721871/LOC115725611/LOC115724574/LOC115724953/LOC115697653/LOC115697494/LOC115698119/LOC115701…	34
189	H3K4me3	GO:0035195	miRNA-mediated gene silencing	26/11786	26/15562	0.000722632	0.00850043	0.00596522	LOC115704391/LOC115705691/LOC115706055/LOC115706160/LOC115706636/LOC115708792/LOC115709646/LOC115709347/LOC115714129/LOC115716447/LOC115716262/LOC115716551/LOC115720772/LOC115721436/LOC115719176/LOC115720866/LOC115719200/LOC115722906/LOC115721800/LOC115725377/LOC115695915/LOC115695839/LOC115725280/LOC115697994/LOC115700793/LOC115700608	26
190	H3K4me3	GO:0051983	regulation of chromosome segregation	26/11786	26/15562	0.000722632	0.00850043	0.00596522	LOC115703082/LOC115699147/LOC115705997/LOC115706060/LOC115707955/LOC115706082/LOC115704754/LOC115704365/LOC115706898/LOC115711362/LOC115709353/LOC115711949/LOC115713293/LOC115720767/LOC115721249/LOC115718402/LOC115721782/LOC115721757/LOC115725099/LOC115696864/LOC115697930/LOC115698281/LOC115701502/LOC115698819/LOC115699664/LOC115698551	26
191	H3K4me3	GO:0006664	glycolipid metabolic process	58/11786	63/15562	0.000770133	0.00891837	0.00625851	LOC115702965/LOC115707000/LOC115707728/LOC115708276/LOC115712025/LOC115698229/LOC115705095/LOC115705232/LOC115705557/LOC115705539/LOC115705654/LOC115705608/LOC115706653/LOC115707138/LOC115707216/LOC115707446/LOC115707765/LOC115708821/LOC115711507/LOC115709641/LOC115708830/LOC115711671/LOC115708709/LOC115714336/LOC115714585/LOC115714113/LOC115714501/LOC115712936/LOC115712942/LOC115717414/LOC115715…	58
192	H3K4me3	GO:0010948	negative regulation of cell cycle process	58/11786	63/15562	0.000770133	0.00891837	0.00625851	LOC115702671/LOC115703082/LOC115703195/LOC115719849/LOC115723901/LOC115702797/LOC115705372/LOC115722563/LOC115699428/LOC115702316/LOC115705540/LOC115704754/LOC115704365/LOC115705989/LOC115707872/LOC115708656/LOC115709424/LOC115710062/LOC115711362/LOC115709686/LOC115709043/LOC115709354/LOC115715115/LOC115711949/LOC115714937/LOC115713293/LOC115712237/LOC115715173/LOC115714461/LOC115715784/LOC115717…	58
193	H3K4me3	GO:1903509	liposaccharide metabolic process	58/11786	63/15562	0.000770133	0.00891837	0.00625851	LOC115702965/LOC115707000/LOC115707728/LOC115708276/LOC115712025/LOC115698229/LOC115705095/LOC115705232/LOC115705557/LOC115705539/LOC115705654/LOC115705608/LOC115706653/LOC115707138/LOC115707216/LOC115707446/LOC115707765/LOC115708821/LOC115711507/LOC115709641/LOC115708830/LOC115711671/LOC115708709/LOC115714336/LOC115714585/LOC115714113/LOC115714501/LOC115712936/LOC115712942/LOC115717414/LOC115715…	58
194	H3K4me3	GO:0051172	negative regulation of nitrogen compound metabolic process	312/11786	378/15562	0.0007863	0.00905858	0.0063569	LOC115702592/LOC115704488/LOC115702736/LOC115702766/LOC115702813/LOC115724257/LOC115702697/LOC115703000/LOC115698890/LOC115703078/LOC115705387/LOC115707433/LOC115715318/LOC115716590/LOC115720249/LOC115694702/LOC115695222/LOC115702759/LOC115702778/LOC115703071/LOC115703697/LOC115704745/LOC115704241/LOC115704249/LOC115705210/LOC115702425/LOC115706453/LOC115706935/LOC115709095/LOC115710310/LOC115711…	312
195	H3K4me3	GO:0090696	post-embryonic plant organ development	88/11786	99/15562	0.000790346	0.00905858	0.0063569	LOC115703151/LOC115703179/LOC115717286/LOC115721901/LOC115702835/LOC115710554/LOC115713424/LOC115697219/LOC115700312/LOC115707648/LOC115704658/LOC115705581/LOC115703789/LOC115706187/LOC115705837/LOC115706751/LOC115705617/LOC115705229/LOC115704458/LOC115705709/LOC115704245/LOC115705512/LOC115706236/LOC115705039/LOC115705047/LOC115711508/LOC115709259/LOC115708735/LOC115711475/LOC115710039/LOC115710…	88
196	H3K4me3	GO:0045017	glycerolipid biosynthetic process	124/11786	143/15562	0.000818534	0.00933379	0.00655003	LOC115703123/LOC115702611/LOC115708996/LOC115702949/LOC115703150/LOC115703157/LOC115703234/LOC115709998/LOC115702965/LOC115708276/LOC115709308/LOC115710352/LOC115710976/LOC115697219/LOC115698229/LOC115705473/LOC115703600/LOC115705441/LOC115705095/LOC115705879/LOC115705212/LOC115704840/LOC115708316/LOC115704902/LOC115707172/LOC115705492/LOC115708124/LOC115703623/LOC115708251/LOC115708250/LOC115705…	124
197	H3K4me3	GO:0006475	internal protein amino acid acetylation	78/11786	87/15562	0.000843985	0.00940607	0.00660075	LOC115704488/LOC115702752/LOC115702766/LOC115702813/LOC115702872/LOC115703046/LOC115704855/LOC115711075/LOC115711086/LOC115713717/LOC115713758/LOC115724500/LOC115698748/LOC115701440/LOC115705510/LOC115705830/LOC115705986/LOC115706936/LOC115706809/LOC115705931/LOC115706141/LOC115706513/LOC115706847/LOC115706945/LOC115707295/LOC115708042/LOC115708058/LOC115709349/LOC115710710/LOC115709260/LOC115708…	78
198	H3K4me3	GO:0016573	histone acetylation	78/11786	87/15562	0.000843985	0.00940607	0.00660075	LOC115704488/LOC115702752/LOC115702766/LOC115702813/LOC115702872/LOC115703046/LOC115704855/LOC115711075/LOC115711086/LOC115713717/LOC115713758/LOC115724500/LOC115698748/LOC115701440/LOC115705510/LOC115705830/LOC115705986/LOC115706936/LOC115706809/LOC115705931/LOC115706141/LOC115706513/LOC115706847/LOC115706945/LOC115707295/LOC115708042/LOC115708058/LOC115709349/LOC115710710/LOC115709260/LOC115708…	78
199	H3K4me3	GO:0018393	internal peptidyl-lysine acetylation	78/11786	87/15562	0.000843985	0.00940607	0.00660075	LOC115704488/LOC115702752/LOC115702766/LOC115702813/LOC115702872/LOC115703046/LOC115704855/LOC115711075/LOC115711086/LOC115713717/LOC115713758/LOC115724500/LOC115698748/LOC115701440/LOC115705510/LOC115705830/LOC115705986/LOC115706936/LOC115706809/LOC115705931/LOC115706141/LOC115706513/LOC115706847/LOC115706945/LOC115707295/LOC115708042/LOC115708058/LOC115709349/LOC115710710/LOC115709260/LOC115708…	78
200	H3K4me3	GO:0018394	peptidyl-lysine acetylation	78/11786	87/15562	0.000843985	0.00940607	0.00660075	LOC115704488/LOC115702752/LOC115702766/LOC115702813/LOC115702872/LOC115703046/LOC115704855/LOC115711075/LOC115711086/LOC115713717/LOC115713758/LOC115724500/LOC115698748/LOC115701440/LOC115705510/LOC115705830/LOC115705986/LOC115706936/LOC115706809/LOC115705931/LOC115706141/LOC115706513/LOC115706847/LOC115706945/LOC115707295/LOC115708042/LOC115708058/LOC115709349/LOC115710710/LOC115709260/LOC115708…	78
201	H3K4me3	GO:0048527	lateral root development	68/11786	75/15562	0.000848572	0.00940607	0.00660075	LOC115703151/LOC115703179/LOC115717286/LOC115721901/LOC115710554/LOC115713424/LOC115697219/LOC115707648/LOC115704658/LOC115703789/LOC115706187/LOC115705837/LOC115706751/LOC115705617/LOC115705229/LOC115704458/LOC115705709/LOC115704245/LOC115705047/LOC115711508/LOC115709259/LOC115711475/LOC115710039/LOC115710038/LOC115712551/LOC115712760/LOC115712109/LOC115712210/LOC115712313/LOC115711962/LOC115714…	68
202	H3K4me3	GO:0042255	ribosome assembly	73/11786	81/15562	0.000854332	0.00940607	0.00660075	LOC115710511/LOC115708919/LOC115698624/LOC115705545/LOC115708353/LOC115708213/LOC115705126/LOC115705011/LOC115705197/LOC115706595/LOC115707731/LOC115703901/LOC115707381/LOC115708260/LOC115704888/LOC115706414/LOC115706962/LOC115707032/LOC115707151/LOC115707838/LOC115705252/LOC115708021/LOC115708052/LOC115708074/LOC115709213/LOC115709214/LOC115709215/LOC115710163/LOC115710241/LOC115710956/LOC115714…	73
203	H3K4me3	GO:0042274	ribosomal small subunit biogenesis	73/11786	81/15562	0.000854332	0.00940607	0.00660075	LOC115702948/LOC115705729/LOC115705135/LOC115708353/LOC115708213/LOC115706767/LOC115703908/LOC115705197/LOC115707381/LOC115708260/LOC115705943/LOC115706962/LOC115707151/LOC115707739/LOC115705252/LOC115708021/LOC115708027/LOC115710297/LOC115709420/LOC115710250/LOC115710311/LOC115714823/LOC115712976/LOC115714990/LOC115713989/LOC115712948/LOC115716821/LOC115716770/LOC115716650/LOC115717511/LOC115717…	73
204	H3K4me3	GO:0006066	alcohol metabolic process	110/11786	126/15562	0.000916435	0.00999138	0.00701149	LOC115703123/LOC115702614/LOC115702934/LOC115723648/LOC115722899/LOC115695287/LOC115696485/LOC115694915/LOC115698051/LOC115696655/LOC115695062/LOC115704378/LOC115705104/LOC115706017/LOC115713050/LOC115714045/LOC115707644/LOC115704757/LOC115706046/LOC115706180/LOC115705560/LOC115704840/LOC115705000/LOC115705058/LOC115706786/LOC115706716/LOC115705779/LOC115705936/LOC115708206/LOC115706646/LOC115706…	110
205	H3K4me3	GO:0072657	protein localization to membrane	110/11786	126/15562	0.000916435	0.00999138	0.00701149	LOC115702642/LOC115702923/LOC115699346/LOC115700804/LOC115702343/LOC115708202/LOC115709308/LOC115711387/LOC115699557/LOC115702317/LOC115705836/LOC115708339/LOC115708225/LOC115705207/LOC115708272/LOC115706468/LOC115707764/LOC115704770/LOC115705865/LOC115708159/LOC115705681/LOC115705954/LOC115705926/LOC115706335/LOC115706451/LOC115706557/LOC115706621/LOC115706943/LOC115705354/LOC115709112/LOC115711…	110
206	H3K4me3	GO:0071453	cellular response to oxygen levels	33/11786	34/15562	0.000928143	0.0100699	0.00706659	LOC115705664/LOC115705684/LOC115707488/LOC115706910/LOC115709817/LOC115711619/LOC115697874/LOC115704831/LOC115703568/LOC115707742/LOC115707594/LOC115706239/LOC115707183/LOC115708928/LOC115709090/LOC115713001/LOC115712781/LOC115712392/LOC115715205/LOC115712237/LOC115714289/LOC115715197/LOC115717122/LOC115721105/LOC115722044/LOC115723100/LOC115724829/LOC115725021/LOC115694818/LOC115724901/LOC115725…	33
207	H3K4me3	GO:0009617	response to bacterium	245/11786	294/15562	0.000941564	0.0101206	0.00710219	LOC115702597/LOC115702780/LOC115702804/LOC115702822/LOC115702823/LOC115702829/LOC115702830/LOC115702859/LOC115704434/LOC115703193/LOC115703234/LOC115715228/LOC115716590/LOC115695922/LOC115695831/LOC115702467/LOC115703620/LOC115703727/LOC115709257/LOC115704142/LOC115704957/LOC115707089/LOC115709698/LOC115710310/LOC115713500/LOC115713972/LOC115713988/LOC115695001/LOC115699852/LOC115700469/LOC115702…	245
208	H3K4me3	GO:0046165	alcohol biosynthetic process	57/11786	62/15562	0.000941874	0.0101206	0.00710219	LOC115702614/LOC115702934/LOC115723648/LOC115722899/LOC115705104/LOC115706017/LOC115714045/LOC115707644/LOC115704757/LOC115705779/LOC115706646/LOC115706893/LOC115707243/LOC115707333/LOC115705280/LOC115706921/LOC115709262/LOC115710324/LOC115712828/LOC115712755/LOC115712609/LOC115716578/LOC115716735/LOC115715730/LOC115716105/LOC115716475/LOC115717421/LOC115719484/LOC115721106/LOC115719311/LOC115719…	57
209	H3K4me3	GO:0033045	regulation of sister chromatid segregation	25/11786	25/15562	0.000954641	0.0101677	0.00713525	LOC115703082/LOC115699147/LOC115705997/LOC115706060/LOC115707955/LOC115706082/LOC115704754/LOC115704365/LOC115706898/LOC115711362/LOC115709353/LOC115711949/LOC115713293/LOC115720767/LOC115721249/LOC115718402/LOC115721782/LOC115721757/LOC115725099/LOC115696864/LOC115697930/LOC115701502/LOC115698819/LOC115699664/LOC115698551	25
210	H3K4me3	GO:0007017	microtubule-based process	161/11786	189/15562	0.000955358	0.0101677	0.00713525	LOC115702711/LOC115702734/LOC115702733/LOC115702907/LOC115703222/LOC115699804/LOC115707973/LOC115709986/LOC115712112/LOC115714593/LOC115714604/LOC115718923/LOC115696573/LOC115698324/LOC115698501/LOC115698652/LOC115699125/LOC115699845/LOC115703663/LOC115703668/LOC115705481/LOC115705653/LOC115707516/LOC115705515/LOC115705482/LOC115705831/LOC115706388/LOC115704349/LOC115705671/LOC115705805/LOC115705…	161
211	H3K4me3	GO:0071214	cellular response to abiotic stimulus	114/11786	131/15562	0.000977646	0.0103068	0.00723283	LOC115702815/LOC115702819/LOC115702833/LOC115703137/LOC115703002/LOC115703001/LOC115703234/LOC115713415/LOC115721756/LOC115695332/LOC115695661/LOC115695269/LOC115695743/LOC115703041/LOC115704903/LOC115706017/LOC115706057/LOC115710101/LOC115711038/LOC115699248/LOC115700135/LOC115701871/LOC115706248/LOC115705128/LOC115705617/LOC115705838/LOC115705682/LOC115703637/LOC115705789/LOC115705788/LOC115706…	114
212	H3K4me3	GO:0104004	cellular response to environmental stimulus	114/11786	131/15562	0.000977646	0.0103068	0.00723283	LOC115702815/LOC115702819/LOC115702833/LOC115703137/LOC115703002/LOC115703001/LOC115703234/LOC115713415/LOC115721756/LOC115695332/LOC115695661/LOC115695269/LOC115695743/LOC115703041/LOC115704903/LOC115706017/LOC115706057/LOC115710101/LOC115711038/LOC115699248/LOC115700135/LOC115701871/LOC115706248/LOC115705128/LOC115705617/LOC115705838/LOC115705682/LOC115703637/LOC115705789/LOC115705788/LOC115706…	114
213	H3K4me3	GO:0006839	mitochondrial transport	77/11786	86/15562	0.0010061	0.010557	0.00740841	LOC115702626/LOC115702633/LOC115702879/LOC115702892/LOC115702923/LOC115699346/LOC115706814/LOC115708514/LOC115708695/LOC115713121/LOC115700416/LOC115705543/LOC115708272/LOC115708161/LOC115705865/LOC115704985/LOC115706031/LOC115706722/LOC115706827/LOC115707514/LOC115708033/LOC115707559/LOC115705347/LOC115711532/LOC115709036/LOC115711406/LOC115710058/LOC115712576/LOC115714976/LOC115713032/LOC115713…	77
214	H3K4me3	GO:0000724	double-strand break repair via homologous recombination	72/11786	80/15562	0.00102363	0.0106907	0.00750223	LOC115703137/LOC115704434/LOC115703167/LOC115705574/LOC115706157/LOC115706037/LOC115704979/LOC115705230/LOC115707602/LOC115704793/LOC115704735/LOC115707106/LOC115707892/LOC115705602/LOC115705989/LOC115705247/LOC115707872/LOC115708656/LOC115711251/LOC115709787/LOC115708746/LOC115708823/LOC115710251/LOC115715115/LOC115711969/LOC115715271/LOC115714324/LOC115715152/LOC115712237/LOC115712107/LOC115712…	72
215	H3K4me3	GO:0006626	protein targeting to mitochondrion	51/11786	55/15562	0.0010476	0.0108902	0.00764225	LOC115702879/LOC115702892/LOC115702923/LOC115699346/LOC115708514/LOC115713121/LOC115705543/LOC115708161/LOC115705865/LOC115704985/LOC115706722/LOC115706827/LOC115707514/LOC115707559/LOC115711532/LOC115711406/LOC115710058/LOC115714976/LOC115713032/LOC115713033/LOC115713044/LOC115715088/LOC115712058/LOC115712002/LOC115712702/LOC115714264/LOC115716627/LOC115715734/LOC115717977/LOC115721139/LOC115719…	51
216	H3K4me3	GO:0006665	sphingolipid metabolic process	45/11786	48/15562	0.00111291	0.0115155	0.00808108	LOC115702927/LOC115702715/LOC115706555/LOC115709151/LOC115712025/LOC115713775/LOC115714045/LOC115700382/LOC115706113/LOC115706029/LOC115704904/LOC115704960/LOC115706612/LOC115705557/LOC115708206/LOC115706893/LOC115707058/LOC115705280/LOC115709734/LOC115709662/LOC115713224/LOC115712929/LOC115714440/LOC115712891/LOC115716311/LOC115717316/LOC115718761/LOC115719287/LOC115719383/LOC115722446/LOC115722…	45
217	H3K4me3	GO:0000413	protein peptidyl-prolyl isomerization	81/11786	91/15562	0.00115572	0.0119034	0.00835326	LOC115698022/LOC115703373/LOC115703243/LOC115715228/LOC115717462/LOC115699935/LOC115703922/LOC115704638/LOC115706704/LOC115709351/LOC115709861/LOC115709878/LOC115703015/LOC115698652/LOC115703693/LOC115707449/LOC115706040/LOC115705383/LOC115705206/LOC115706339/LOC115706367/LOC115706366/LOC115706370/LOC115709019/LOC115708727/LOC115709443/LOC115710840/LOC115709326/LOC115709457/LOC115708714/LOC115714…	81
218	H3K4me3	GO:0019395	fatty acid oxidation	32/11786	33/15562	0.0011932	0.0121772	0.00854538	LOC115723066/LOC115706299/LOC115708301/LOC115706117/LOC115706832/LOC115706950/LOC115707261/LOC115707486/LOC115707697/LOC115712181/LOC115712180/LOC115714493/LOC115714555/LOC115712927/LOC115715988/LOC115717342/LOC115719179/LOC115720660/LOC115723785/LOC115722526/LOC115722320/LOC115722169/LOC115722296/LOC115723201/LOC115696900/LOC115698204/LOC115697235/LOC115699135/LOC115699150/LOC115699414/LOC115702…	32
219	H3K4me3	GO:0036294	cellular response to decreased oxygen levels	32/11786	33/15562	0.0011932	0.0121772	0.00854538	LOC115705664/LOC115705684/LOC115707488/LOC115706910/LOC115709817/LOC115711619/LOC115697874/LOC115704831/LOC115703568/LOC115707742/LOC115707594/LOC115706239/LOC115707183/LOC115708928/LOC115709090/LOC115713001/LOC115712781/LOC115712392/LOC115715205/LOC115714289/LOC115715197/LOC115717122/LOC115721105/LOC115722044/LOC115723100/LOC115724829/LOC115725021/LOC115694818/LOC115724901/LOC115725723/LOC115699…	32
220	H3K4me3	GO:0009411	response to UV	61/11786	67/15562	0.00120884	0.0122807	0.00861805	LOC115703002/LOC115703001/LOC115703016/LOC115704053/LOC115703047/LOC115703544/LOC115708212/LOC115711038/LOC115701871/LOC115705581/LOC115705830/LOC115705507/LOC115705579/LOC115705676/LOC115707878/LOC115705273/LOC115711657/LOC115708688/LOC115708927/LOC115709438/LOC115714640/LOC115712704/LOC115714109/LOC115714346/LOC115715124/LOC115714342/LOC115712237/LOC115715084/LOC115715008/LOC115712175/LOC115712…	61
221	H3K4me3	GO:1903047	mitotic cell cycle process	167/11786	197/15562	0.00125452	0.0126871	0.00890324	LOC115702619/LOC115702671/LOC115702711/LOC115702732/LOC115702818/LOC115702834/LOC115702964/LOC115703082/LOC115703222/LOC115704043/LOC115723901/LOC115702797/LOC115702647/LOC115708347/LOC115708936/LOC115709986/LOC115711061/LOC115711182/LOC115712112/LOC115713754/LOC115713814/LOC115714593/LOC115714604/LOC115719232/LOC115697268/LOC115698652/LOC115699101/LOC115699147/LOC115699428/LOC115700579/LOC115702…	167
222	H3K4me3	GO:0007088	regulation of mitotic nuclear division	24/11786	24/15562	0.00126111	0.0126963	0.00890971	LOC115703082/LOC115699147/LOC115705997/LOC115706060/LOC115707955/LOC115706082/LOC115704754/LOC115704365/LOC115706898/LOC115711362/LOC115709353/LOC115711949/LOC115713293/LOC115720767/LOC115721249/LOC115718402/LOC115721782/LOC115725099/LOC115697930/LOC115701502/LOC115698855/LOC115698819/LOC115699664/LOC115698551	24
223	H3K4me3	GO:1901988	negative regulation of cell cycle phase transition	50/11786	54/15562	0.00129029	0.0129319	0.009075	LOC115702671/LOC115703082/LOC115703195/LOC115719849/LOC115723901/LOC115702797/LOC115705372/LOC115699428/LOC115702316/LOC115705540/LOC115704754/LOC115704365/LOC115707872/LOC115708656/LOC115709424/LOC115710062/LOC115711362/LOC115709686/LOC115709043/LOC115715115/LOC115711949/LOC115714937/LOC115713293/LOC115712237/LOC115715173/LOC115715784/LOC115717529/LOC115715625/LOC115717318/LOC115715575/LOC115716…	50
224	H3K4me3	GO:0006164	purine nucleotide biosynthetic process	85/11786	96/15562	0.00130094	0.0129804	0.00910905	LOC115702850/LOC115724952/LOC115704957/LOC115705607/LOC115708073/LOC115709698/LOC115710101/LOC115710480/LOC115710919/LOC115712548/LOC115713640/LOC115702238/LOC115702361/LOC115706092/LOC115707175/LOC115707758/LOC115707664/LOC115705417/LOC115708323/LOC115704842/LOC115705183/LOC115708106/LOC115707930/LOC115705477/LOC115706093/LOC115707018/LOC115707116/LOC115707550/LOC115707697/LOC115704620/LOC115705…	85
225	H3K4me3	GO:0006906	vesicle fusion	38/11786	40/15562	0.00138081	0.0136554	0.00958274	LOC115708838/LOC115699031/LOC115702171/LOC115708180/LOC115708162/LOC115707485/LOC115708096/LOC115707687/LOC115706451/LOC115706475/LOC115706477/LOC115706885/LOC115707137/LOC115707542/LOC115707910/LOC115714478/LOC115717582/LOC115716740/LOC115716424/LOC115715593/LOC115716110/LOC115719647/LOC115718523/LOC115722428/LOC115724067/LOC115723463/LOC115722780/LOC115723394/LOC115723213/LOC115725765/LOC115699…	38
226	H3K4me3	GO:0045930	negative regulation of mitotic cell cycle	38/11786	40/15562	0.00138081	0.0136554	0.00958274	LOC115702671/LOC115703082/LOC115723901/LOC115702797/LOC115699428/LOC115702316/LOC115705540/LOC115704754/LOC115704365/LOC115707872/LOC115708656/LOC115709424/LOC115711362/LOC115709043/LOC115715115/LOC115711949/LOC115714937/LOC115713293/LOC115712237/LOC115715784/LOC115715625/LOC115715575/LOC115720767/LOC115718407/LOC115720971/LOC115718397/LOC115718461/LOC115723037/LOC115725709/LOC115725368/LOC115725…	38
227	H3K4me3	GO:0009247	glycolipid biosynthetic process	55/11786	60/15562	0.0014036	0.0138196	0.00969797	LOC115702965/LOC115707000/LOC115707728/LOC115708276/LOC115698229/LOC115705095/LOC115705232/LOC115705557/LOC115705539/LOC115705654/LOC115705608/LOC115706653/LOC115707138/LOC115707216/LOC115707446/LOC115707765/LOC115708821/LOC115711507/LOC115709641/LOC115708830/LOC115711671/LOC115708709/LOC115714336/LOC115714585/LOC115714113/LOC115714501/LOC115712936/LOC115712942/LOC115717414/LOC115715747/LOC115716…	55
228	H3K4me3	GO:0006644	phospholipid metabolic process	190/11786	226/15562	0.00143557	0.0140724	0.00987536	LOC115702611/LOC115702729/LOC115708996/LOC115702962/LOC115702971/LOC115703150/LOC115703157/LOC115703163/LOC115709998/LOC115702965/LOC115703972/LOC115708276/LOC115709308/LOC115710352/LOC115710976/LOC115711722/LOC115722381/LOC115697219/LOC115698229/LOC115705473/LOC115705468/LOC115705504/LOC115703600/LOC115705441/LOC115705095/LOC115705232/LOC115705879/LOC115708316/LOC115704902/LOC115707172/LOC115705…	190
229	H3K4me3	GO:0044770	cell cycle phase transition	98/11786	112/15562	0.00145603	0.0142106	0.00997237	LOC115702619/LOC115702671/LOC115702732/LOC115702964/LOC115703082/LOC115703195/LOC115719849/LOC115723901/LOC115702797/LOC115702647/LOC115705372/LOC115708347/LOC115711061/LOC115711182/LOC115713754/LOC115713814/LOC115699101/LOC115699147/LOC115699428/LOC115700579/LOC115702316/LOC115705997/LOC115706060/LOC115707955/LOC115706082/LOC115705540/LOC115704754/LOC115704365/LOC115706898/LOC115705277/LOC115707…	98
230	H3K4me3	GO:0035194	post-transcriptional gene silencing by RNA	60/11786	66/15562	0.00146308	0.0142173	0.00997705	LOC115704391/LOC115699522/LOC115705691/LOC115703950/LOC115705095/LOC115705141/LOC115705449/LOC115705817/LOC115706055/LOC115705637/LOC115706160/LOC115706636/LOC115708792/LOC115709629/LOC115709646/LOC115708696/LOC115709347/LOC115711193/LOC115712688/LOC115713457/LOC115711981/LOC115714129/LOC115715293/LOC115716447/LOC115716262/LOC115716829/LOC115716698/LOC115716093/LOC115716551/LOC115720772/LOC115721…	60
231	H3K4me3	GO:0009119	ribonucleoside metabolic process	31/11786	32/15562	0.00153274	0.0147659	0.010362	LOC115703114/LOC115703131/LOC115703913/LOC115710101/LOC115712548/LOC115713640/LOC115698624/LOC115705163/LOC115705417/LOC115705713/LOC115705873/LOC115707116/LOC115707270/LOC115704624/LOC115710333/LOC115709677/LOC115712679/LOC115712416/LOC115714036/LOC115716364/LOC115716800/LOC115716958/LOC115716183/LOC115720686/LOC115722730/LOC115722830/LOC115721913/LOC115721871/LOC115725611/LOC115699586/LOC115702…	31
232	H3K4me3	GO:0071456	cellular response to hypoxia	31/11786	32/15562	0.00153274	0.0147659	0.010362	LOC115705664/LOC115705684/LOC115707488/LOC115706910/LOC115709817/LOC115697874/LOC115704831/LOC115703568/LOC115707742/LOC115707594/LOC115706239/LOC115707183/LOC115708928/LOC115709090/LOC115713001/LOC115712781/LOC115712392/LOC115715205/LOC115714289/LOC115715197/LOC115717122/LOC115721105/LOC115722044/LOC115723100/LOC115724829/LOC115725021/LOC115694818/LOC115724901/LOC115725723/LOC115699704/LOC115698…	31
233	H3K4me3	GO:0019439	aromatic compound catabolic process	209/11786	250/15562	0.00155775	0.0149423	0.0104859	LOC115702736/LOC115701559/LOC115702795/LOC115702809/LOC115702924/LOC115702968/LOC115703193/LOC115703195/LOC115696485/LOC115694915/LOC115697784/LOC115696655/LOC115695062/LOC115697868/LOC115703071/LOC115703796/LOC115704249/LOC115709368/LOC115697431/LOC115695344/LOC115699125/LOC115705519/LOC115705686/LOC115705119/LOC115706264/LOC115706748/LOC115706668/LOC115705197/LOC115706055/LOC115706139/LOC115705…	209
234	H3K4me3	GO:0006402	mRNA catabolic process	93/11786	106/15562	0.00157186	0.014968	0.0105038	LOC115702736/LOC115703195/LOC115696485/LOC115694915/LOC115697784/LOC115696655/LOC115695062/LOC115697868/LOC115703071/LOC115703796/LOC115704249/LOC115709368/LOC115695344/LOC115706264/LOC115706748/LOC115705197/LOC115706055/LOC115706139/LOC115708273/LOC115705405/LOC115708306/LOC115705625/LOC115708113/LOC115705942/LOC115707364/LOC115707118/LOC115707231/LOC115707916/LOC115709390/LOC115709250/LOC115709…	93
235	H3K4me3	GO:0000075	cell cycle checkpoint signaling	49/11786	53/15562	0.00158721	0.014968	0.0105038	LOC115702671/LOC115703082/LOC115703195/LOC115719849/LOC115723901/LOC115702797/LOC115705372/LOC115699428/LOC115702316/LOC115704754/LOC115704365/LOC115707872/LOC115708656/LOC115709424/LOC115710062/LOC115711362/LOC115709686/LOC115709043/LOC115715115/LOC115711949/LOC115714937/LOC115713293/LOC115712237/LOC115715173/LOC115715784/LOC115717529/LOC115715625/LOC115717318/LOC115715575/LOC115716981/LOC115720…	49
236	H3K4me3	GO:0043254	regulation of protein-containing complex assembly	49/11786	53/15562	0.00158721	0.014968	0.0105038	LOC115702674/LOC115702784/LOC115702799/LOC115704956/LOC115699804/LOC115712375/LOC115712383/LOC115701199/LOC115708174/LOC115705229/LOC115708352/LOC115705709/LOC115707553/LOC115706196/LOC115707206/LOC115707402/LOC115707539/LOC115707552/LOC115708916/LOC115709989/LOC115709883/LOC115711537/LOC115712632/LOC115713970/LOC115716110/LOC115719601/LOC115719118/LOC115718997/LOC115720413/LOC115718638/LOC115719…	49
237	H3K4me3	GO:0050684	regulation of mRNA processing	49/11786	53/15562	0.00158721	0.014968	0.0105038	LOC115702599/LOC115702792/LOC115715318/LOC115696283/LOC115696009/LOC115712402/LOC115700176/LOC115706268/LOC115705478/LOC115705553/LOC115705922/LOC115706160/LOC115706184/LOC115706600/LOC115705305/LOC115709390/LOC115710188/LOC115710249/LOC115710191/LOC115709457/LOC115712412/LOC115713797/LOC115713961/LOC115712289/LOC115714058/LOC115714428/LOC115716841/LOC115716696/LOC115718181/LOC115716272/LOC115716…	49
238	H3K4me3	GO:0009150	purine ribonucleotide metabolic process	165/11786	195/15562	0.00159529	0.0149809	0.0105129	LOC115702783/LOC115702801/LOC115702836/LOC115702850/LOC115703114/LOC115703131/LOC115724952/LOC115704378/LOC115704957/LOC115705607/LOC115708073/LOC115709698/LOC115710101/LOC115710480/LOC115711259/LOC115711637/LOC115711722/LOC115712548/LOC115713640/LOC115714139/LOC115723768/LOC115700647/LOC115701015/LOC115701945/LOC115702002/LOC115702238/LOC115702361/LOC115706301/LOC115705137/LOC115705136/LOC115707…	165
239	H3K4me3	GO:0051668	localization within membrane	136/11786	159/15562	0.00163774	0.0153153	0.0107476	LOC115702642/LOC115702923/LOC115703160/LOC115705660/LOC115713633/LOC115699346/LOC115700804/LOC115702343/LOC115702615/LOC115705842/LOC115708202/LOC115709308/LOC115711387/LOC115699557/LOC115700291/LOC115702317/LOC115705836/LOC115708339/LOC115708225/LOC115705207/LOC115708272/LOC115706468/LOC115707764/LOC115704770/LOC115705865/LOC115708159/LOC115705681/LOC115705954/LOC115705959/LOC115705926/LOC115706…	136
240	H3K4me3	GO:0006383	transcription by RNA polymerase III	23/11786	23/15562	0.00166594	0.0153858	0.0107971	LOC115705439/LOC115706843/LOC115706052/LOC115711552/LOC115708805/LOC115710074/LOC115715103/LOC115712076/LOC115712958/LOC115715619/LOC115720814/LOC115721131/LOC115718647/LOC115719280/LOC115723276/LOC115723379/LOC115694817/LOC115724859/LOC115697298/LOC115697255/LOC115697803/LOC115697406/LOC115699002	23
241	H3K4me3	GO:0033047	regulation of mitotic sister chromatid segregation	23/11786	23/15562	0.00166594	0.0153858	0.0107971	LOC115703082/LOC115699147/LOC115705997/LOC115706060/LOC115707955/LOC115706082/LOC115704754/LOC115704365/LOC115706898/LOC115711362/LOC115709353/LOC115711949/LOC115713293/LOC115720767/LOC115721249/LOC115718402/LOC115721782/LOC115725099/LOC115697930/LOC115701502/LOC115698819/LOC115699664/LOC115698551	23
242	H3K4me3	GO:0051123	RNA polymerase II preinitiation complex assembly	23/11786	23/15562	0.00166594	0.0153858	0.0107971	LOC115697659/LOC115701199/LOC115707202/LOC115706196/LOC115707069/LOC115707206/LOC115707402/LOC115707539/LOC115709767/LOC115710313/LOC115709742/LOC115709913/LOC115714747/LOC115714412/LOC115717035/LOC115716110/LOC115720806/LOC115719601/LOC115718997/LOC115719076/LOC115722931/LOC115724516/LOC115725232	23
243	H3K4me3	GO:0006352	DNA-templated transcription initiation	74/11786	83/15562	0.00169209	0.0154992	0.0108767	LOC115702736/LOC115703047/LOC115707512/LOC115710578/LOC115697319/LOC115697659/LOC115701199/LOC115702324/LOC115704716/LOC115707790/LOC115708179/LOC115707202/LOC115706756/LOC115705576/LOC115706196/LOC115708197/LOC115707024/LOC115707069/LOC115707206/LOC115707236/LOC115707352/LOC115707373/LOC115707402/LOC115707539/LOC115707942/LOC115708655/LOC115709363/LOC115709767/LOC115709819/LOC115709141/LOC115710…	74
244	H3K4me3	GO:0044772	mitotic cell cycle phase transition	74/11786	83/15562	0.00169209	0.0154992	0.0108767	LOC115702619/LOC115702671/LOC115702732/LOC115702964/LOC115703082/LOC115702647/LOC115708347/LOC115711061/LOC115711182/LOC115713754/LOC115713814/LOC115699101/LOC115699147/LOC115699428/LOC115700579/LOC115702316/LOC115705997/LOC115706060/LOC115707955/LOC115706082/LOC115705540/LOC115704754/LOC115704365/LOC115706898/LOC115705277/LOC115707872/LOC115711362/LOC115710671/LOC115709043/LOC115709353/LOC115715…	74
245	H3K4me3	GO:0034976	response to endoplasmic reticulum stress	64/11786	71/15562	0.00177675	0.0162083	0.0113743	LOC115702597/LOC115705652/LOC115707744/LOC115709948/LOC115714059/LOC115700360/LOC115701199/LOC115702317/LOC115706612/LOC115707655/LOC115708209/LOC115706276/LOC115706366/LOC115707195/LOC115707301/LOC115707402/LOC115707782/LOC115707847/LOC115709633/LOC115709618/LOC115709563/LOC115712498/LOC115712378/LOC115712760/LOC115712237/LOC115715083/LOC115712804/LOC115714454/LOC115716778/LOC115717050/LOC115717…	64
246	H3K4me3	GO:1905392	plant organ morphogenesis	180/11786	214/15562	0.00180686	0.016416	0.01152	LOC115702611/LOC115702773/LOC115716842/LOC115703054/LOC115703151/LOC115703179/LOC115721901/LOC115702835/LOC115704122/LOC115704128/LOC115704558/LOC115702461/LOC115710554/LOC115712694/LOC115713424/LOC115697219/LOC115700312/LOC115702351/LOC115706462/LOC115706637/LOC115707648/LOC115704658/LOC115705581/LOC115706187/LOC115705837/LOC115706200/LOC115705537/LOC115706681/LOC115705207/LOC115706751/LOC115706…	180
247	H3K4me3	GO:1990542	mitochondrial transmembrane transport	48/11786	52/15562	0.0019499	0.0172838	0.012129	LOC115702879/LOC115702892/LOC115706814/LOC115708514/LOC115708695/LOC115713121/LOC115698883/LOC115700416/LOC115705543/LOC115708161/LOC115706031/LOC115706827/LOC115707514/LOC115708033/LOC115705347/LOC115711532/LOC115709036/LOC115711406/LOC115710058/LOC115712576/LOC115713032/LOC115713033/LOC115713039/LOC115714439/LOC115715088/LOC115712058/LOC115712002/LOC115712702/LOC115714264/LOC115716787/LOC115719…	48
248	H3K4me3	GO:0006260	DNA replication	147/11786	173/15562	0.00196064	0.0172838	0.012129	LOC115703218/LOC115703121/LOC115705574/LOC115709200/LOC115703080/LOC115703697/LOC115704772/LOC115704790/LOC115705372/LOC115707998/LOC115709665/LOC115713359/LOC115722563/LOC115699428/LOC115700312/LOC115701871/LOC115706290/LOC115706433/LOC115705644/LOC115706681/LOC115706762/LOC115706763/LOC115705219/LOC115705095/LOC115704979/LOC115704072/LOC115707602/LOC115704793/LOC115704735/LOC115707106/LOC115706…	147
249	H3K4me3	GO:0007031	peroxisome organization	30/11786	31/15562	0.00196727	0.0172838	0.012129	LOC115723066/LOC115706299/LOC115707661/LOC115703173/LOC115706048/LOC115706561/LOC115708278/LOC115705597/LOC115706592/LOC115706922/LOC115707486/LOC115709349/LOC115708937/LOC115711267/LOC115709058/LOC115711492/LOC115711405/LOC115712658/LOC115716095/LOC115716253/LOC115719179/LOC115719001/LOC115720660/LOC115720703/LOC115722526/LOC115723201/LOC115725097/LOC115697235/LOC115701301/LOC115701165	30
250	H3K4me3	GO:0009062	fatty acid catabolic process	30/11786	31/15562	0.00196727	0.0172838	0.012129	LOC115723066/LOC115706299/LOC115708301/LOC115706516/LOC115706832/LOC115707261/LOC115707486/LOC115712181/LOC115712180/LOC115714493/LOC115714555/LOC115712927/LOC115715988/LOC115717342/LOC115719179/LOC115720660/LOC115723785/LOC115722526/LOC115722320/LOC115722169/LOC115722296/LOC115723201/LOC115696900/LOC115698204/LOC115697235/LOC115699135/LOC115699150/LOC115699414/LOC115702146/LOC115702272	30
251	H3K4me3	GO:0009581	detection of external stimulus	30/11786	31/15562	0.00196727	0.0172838	0.012129	LOC115716590/LOC115695661/LOC115695743/LOC115703041/LOC115718009/LOC115706351/LOC115706361/LOC115710101/LOC115711038/LOC115697363/LOC115700135/LOC115707601/LOC115705838/LOC115707394/LOC115710333/LOC115714721/LOC115716057/LOC115716467/LOC115721282/LOC115719277/LOC115721719/LOC115724200/LOC115695963/LOC115698130/LOC115697192/LOC115697533/LOC115699078/LOC115699438/LOC115700997/LOC115699015	30
252	H3K4me3	GO:0009582	detection of abiotic stimulus	30/11786	31/15562	0.00196727	0.0172838	0.012129	LOC115716590/LOC115695661/LOC115695743/LOC115703041/LOC115718009/LOC115706351/LOC115706361/LOC115710101/LOC115711038/LOC115697363/LOC115700135/LOC115707601/LOC115705838/LOC115707394/LOC115710333/LOC115714721/LOC115716057/LOC115716467/LOC115721282/LOC115719277/LOC115721719/LOC115724200/LOC115695963/LOC115698130/LOC115697192/LOC115697533/LOC115699078/LOC115699438/LOC115700997/LOC115699015	30
253	H3K4me3	GO:0071489	cellular response to red or far red light	30/11786	31/15562	0.00196727	0.0172838	0.012129	LOC115702819/LOC115702833/LOC115695332/LOC115695661/LOC115695269/LOC115695743/LOC115710101/LOC115711038/LOC115700135/LOC115706248/LOC115705128/LOC115705838/LOC115707394/LOC115710333/LOC115714721/LOC115712353/LOC115716057/LOC115719277/LOC115721719/LOC115721707/LOC115721945/LOC115695963/LOC115697505/LOC115698130/LOC115697192/LOC115697533/LOC115699078/LOC115699438/LOC115700997/LOC115699015	30
254	H3K4me3	GO:0006479	protein methylation	96/11786	110/15562	0.00197197	0.0172838	0.012129	LOC115702773/LOC115716842/LOC115703121/LOC115707433/LOC115706453/LOC115708212/LOC115709107/LOC115714021/LOC115719082/LOC115697752/LOC115698826/LOC115699021/LOC115705198/LOC115708077/LOC115707975/LOC115706111/LOC115707487/LOC115705051/LOC115707040/LOC115707890/LOC115705155/LOC115705888/LOC115704727/LOC115706212/LOC115703593/LOC115708201/LOC115706718/LOC115706829/LOC115707534/LOC115705308/LOC115711…	96
255	H3K4me3	GO:0008213	protein alkylation	96/11786	110/15562	0.00197197	0.0172838	0.012129	LOC115702773/LOC115716842/LOC115703121/LOC115707433/LOC115706453/LOC115708212/LOC115709107/LOC115714021/LOC115719082/LOC115697752/LOC115698826/LOC115699021/LOC115705198/LOC115708077/LOC115707975/LOC115706111/LOC115707487/LOC115705051/LOC115707040/LOC115707890/LOC115705155/LOC115705888/LOC115704727/LOC115706212/LOC115703593/LOC115708201/LOC115706718/LOC115706829/LOC115707534/LOC115705308/LOC115711…	96
256	H3K4me3	GO:0006366	transcription by RNA polymerase II	335/11786	410/15562	0.00202082	0.0176427	0.0123808	LOC115702592/LOC115704488/LOC115702736/LOC115702766/LOC115702770/LOC115703961/LOC115703017/LOC115703047/LOC115703048/LOC115702433/LOC115703107/LOC115715566/LOC115704413/LOC115705485/LOC115719095/LOC115703252/LOC115707361/LOC115703544/LOC115706453/LOC115706910/LOC115707291/LOC115710310/LOC115710578/LOC115710634/LOC115711048/LOC115711075/LOC115711694/LOC115712195/LOC115712240/LOC115723526/LOC115713…	335
257	H3K4me3	GO:0006413	translational initiation	222/11786	267/15562	0.00203435	0.0176918	0.0124153	LOC115702736/LOC115702781/LOC115702805/LOC115704947/LOC115705885/LOC115704346/LOC115716423/LOC115702814/LOC115702507/LOC115703885/LOC115704449/LOC115705607/LOC115706780/LOC115706765/LOC115707000/LOC115707512/LOC115707589/LOC115708082/LOC115709318/LOC115709527/LOC115710319/LOC115710578/LOC115712599/LOC115713758/LOC115697162/LOC115697659/LOC115697809/LOC115705994/LOC115706608/LOC115706118/LOC115707…	222
258	H3K4me3	GO:0061077	chaperone-mediated protein folding	53/11786	58/15562	0.00208088	0.0179803	0.0126178	LOC115697104/LOC115708359/LOC115708431/LOC115710712/LOC115722410/LOC115702317/LOC115703671/LOC115707449/LOC115706834/LOC115705569/LOC115707698/LOC115705307/LOC115707866/LOC115707966/LOC115707967/LOC115710029/LOC115709958/LOC115709847/LOC115709760/LOC115708714/LOC115710638/LOC115711561/LOC115712551/LOC115714795/LOC115714286/LOC115713018/LOC115712796/LOC115712912/LOC115716668/LOC115716233/LOC115716…	53
259	H3K4me3	GO:0016441	post-transcriptional gene silencing	68/11786	76/15562	0.00208363	0.0179803	0.0126178	LOC115703071/LOC115704391/LOC115699522/LOC115705691/LOC115703950/LOC115705095/LOC115705141/LOC115705051/LOC115705449/LOC115705817/LOC115706055/LOC115707890/LOC115705637/LOC115706160/LOC115706636/LOC115710180/LOC115708792/LOC115709629/LOC115709646/LOC115708696/LOC115709347/LOC115711193/LOC115712688/LOC115713075/LOC115713457/LOC115711981/LOC115714129/LOC115715293/LOC115716447/LOC115716262/LOC115716…	68
260	H3K4me3	GO:0009968	negative regulation of signal transduction	58/11786	64/15562	0.00213479	0.0180165	0.0126431	LOC115702817/LOC115702393/LOC115703195/LOC115697104/LOC115702615/LOC115705842/LOC115706017/LOC115707089/LOC115707344/LOC115709817/LOC115710898/LOC115711315/LOC115712441/LOC115717968/LOC115705433/LOC115705123/LOC115705449/LOC115705534/LOC115705569/LOC115706236/LOC115706960/LOC115707520/LOC115704936/LOC115704592/LOC115704595/LOC115709686/LOC115712712/LOC115712811/LOC115712724/LOC115712688/LOC115713…	58
261	H3K4me3	GO:0010648	negative regulation of cell communication	58/11786	64/15562	0.00213479	0.0180165	0.0126431	LOC115702817/LOC115702393/LOC115703195/LOC115697104/LOC115702615/LOC115705842/LOC115706017/LOC115707089/LOC115707344/LOC115709817/LOC115710898/LOC115711315/LOC115712441/LOC115717968/LOC115705433/LOC115705123/LOC115705449/LOC115705534/LOC115705569/LOC115706236/LOC115706960/LOC115707520/LOC115704936/LOC115704592/LOC115704595/LOC115709686/LOC115712712/LOC115712811/LOC115712724/LOC115712688/LOC115713…	58
262	H3K4me3	GO:0023057	negative regulation of signaling	58/11786	64/15562	0.00213479	0.0180165	0.0126431	LOC115702817/LOC115702393/LOC115703195/LOC115697104/LOC115702615/LOC115705842/LOC115706017/LOC115707089/LOC115707344/LOC115709817/LOC115710898/LOC115711315/LOC115712441/LOC115717968/LOC115705433/LOC115705123/LOC115705449/LOC115705534/LOC115705569/LOC115706236/LOC115706960/LOC115707520/LOC115704936/LOC115704592/LOC115704595/LOC115709686/LOC115712712/LOC115712811/LOC115712724/LOC115712688/LOC115713…	58
263	H3K4me3	GO:0072329	monocarboxylic acid catabolic process	42/11786	45/15562	0.00213774	0.0180165	0.0126431	LOC115723066/LOC115706299/LOC115702331/LOC115708301/LOC115705451/LOC115705619/LOC115706516/LOC115706832/LOC115707261/LOC115707486/LOC115709153/LOC115712181/LOC115712180/LOC115714493/LOC115712392/LOC115714555/LOC115712927/LOC115716615/LOC115715988/LOC115717342/LOC115716152/LOC115719179/LOC115720660/LOC115723785/LOC115722526/LOC115722320/LOC115722169/LOC115722296/LOC115723201/LOC115696900/LOC115698…	42
264	H3K4me3	GO:0006109	regulation of carbohydrate metabolic process	36/11786	38/15562	0.00219096	0.0180165	0.0126431	LOC115705832/LOC115705226/LOC115706017/LOC115710185/LOC115711619/LOC115697056/LOC115703789/LOC115706056/LOC115705847/LOC115705155/LOC115705262/LOC115707880/LOC115709922/LOC115710181/LOC115711687/LOC115709951/LOC115710270/LOC115711336/LOC115711346/LOC115709678/LOC115712276/LOC115717252/LOC115716113/LOC115720621/LOC115722455/LOC115722454/LOC115724089/LOC115722551/LOC115725098/LOC115698299/LOC115698…	36
265	H3K4me3	GO:0009637	response to blue light	36/11786	38/15562	0.00219096	0.0180165	0.0126431	LOC115702815/LOC115715318/LOC115704391/LOC115706017/LOC115706057/LOC115708742/LOC115697431/LOC115699248/LOC115705187/LOC115705617/LOC115706143/LOC115704813/LOC115709363/LOC115709397/LOC115709438/LOC115709783/LOC115710267/LOC115714162/LOC115713414/LOC115716684/LOC115716910/LOC115716461/LOC115719207/LOC115720676/LOC115722889/LOC115721707/LOC115721945/LOC115724811/LOC115724942/LOC115725305/LOC115724…	36
266	H3K4me3	GO:0006801	superoxide metabolic process	22/11786	22/15562	0.00220067	0.0180165	0.0126431	LOC115702594/LOC115708099/LOC115706606/LOC115704018/LOC115705569/LOC115707994/LOC115711336/LOC115711346/LOC115714805/LOC115715697/LOC115716401/LOC115716485/LOC115719020/LOC115720574/LOC115719200/LOC115721697/LOC115723235/LOC115721776/LOC115697339/LOC115696903/LOC115696978/LOC115700608	22
267	H3K4me3	GO:0007091	metaphase/anaphase transition of mitotic cell cycle	22/11786	22/15562	0.00220067	0.0180165	0.0126431	LOC115703082/LOC115699147/LOC115705997/LOC115706060/LOC115707955/LOC115706082/LOC115704754/LOC115704365/LOC115706898/LOC115711362/LOC115709353/LOC115711949/LOC115713293/LOC115720767/LOC115721249/LOC115718402/LOC115721782/LOC115725099/LOC115697930/LOC115701502/LOC115698819/LOC115699664	22
268	H3K4me3	GO:0007129	homologous chromosome pairing at meiosis	22/11786	22/15562	0.00220067	0.0180165	0.0126431	LOC115709986/LOC115699159/LOC115707602/LOC115706429/LOC115705680/LOC115703644/LOC115704718/LOC115704124/LOC115708656/LOC115710062/LOC115709720/LOC115712153/LOC115716070/LOC115716370/LOC115722027/LOC115722511/LOC115721811/LOC115724758/LOC115724714/LOC115695791/LOC115701214/LOC115701370	22
269	H3K4me3	GO:0010965	regulation of mitotic sister chromatid separation	22/11786	22/15562	0.00220067	0.0180165	0.0126431	LOC115703082/LOC115699147/LOC115705997/LOC115706060/LOC115707955/LOC115706082/LOC115704754/LOC115704365/LOC115706898/LOC115711362/LOC115709353/LOC115711949/LOC115713293/LOC115720767/LOC115721249/LOC115718402/LOC115721782/LOC115725099/LOC115697930/LOC115701502/LOC115698819/LOC115699664	22
270	H3K4me3	GO:0035196	miRNA processing	22/11786	22/15562	0.00220067	0.0180165	0.0126431	LOC115704391/LOC115706055/LOC115706160/LOC115708792/LOC115709646/LOC115709347/LOC115714129/LOC115716447/LOC115716262/LOC115716551/LOC115720772/LOC115721436/LOC115719176/LOC115720866/LOC115722906/LOC115721800/LOC115725377/LOC115695915/LOC115695839/LOC115725280/LOC115697994/LOC115700793	22
271	H3K4me3	GO:0044784	metaphase/anaphase transition of cell cycle	22/11786	22/15562	0.00220067	0.0180165	0.0126431	LOC115703082/LOC115699147/LOC115705997/LOC115706060/LOC115707955/LOC115706082/LOC115704754/LOC115704365/LOC115706898/LOC115711362/LOC115709353/LOC115711949/LOC115713293/LOC115720767/LOC115721249/LOC115718402/LOC115721782/LOC115725099/LOC115697930/LOC115701502/LOC115698819/LOC115699664	22
272	H3K4me3	GO:0051306	mitotic sister chromatid separation	22/11786	22/15562	0.00220067	0.0180165	0.0126431	LOC115703082/LOC115699147/LOC115705997/LOC115706060/LOC115707955/LOC115706082/LOC115704754/LOC115704365/LOC115706898/LOC115711362/LOC115709353/LOC115711949/LOC115713293/LOC115720767/LOC115721249/LOC115718402/LOC115721782/LOC115725099/LOC115697930/LOC115701502/LOC115698819/LOC115699664	22
273	H3K4me3	GO:1905818	regulation of chromosome separation	22/11786	22/15562	0.00220067	0.0180165	0.0126431	LOC115703082/LOC115699147/LOC115705997/LOC115706060/LOC115707955/LOC115706082/LOC115704754/LOC115704365/LOC115706898/LOC115711362/LOC115709353/LOC115711949/LOC115713293/LOC115720767/LOC115721249/LOC115718402/LOC115721782/LOC115725099/LOC115697930/LOC115701502/LOC115698819/LOC115699664	22
274	H3K4me3	GO:0046474	glycerophospholipid biosynthetic process	104/11786	120/15562	0.00221343	0.0180548	0.01267	LOC115702611/LOC115708996/LOC115703150/LOC115703157/LOC115709998/LOC115702965/LOC115708276/LOC115709308/LOC115710352/LOC115710976/LOC115697219/LOC115698229/LOC115703600/LOC115705441/LOC115705095/LOC115705879/LOC115708316/LOC115704902/LOC115707172/LOC115705492/LOC115705585/LOC115705608/LOC115707217/LOC115705751/LOC115707523/LOC115706862/LOC115707158/LOC115707180/LOC115707216/LOC115707333/LOC115707…	104
275	H3K4me3	GO:0006417	regulation of translation	121/11786	141/15562	0.0022489	0.0182775	0.0128263	LOC115702736/LOC115703071/LOC115703656/LOC115713910/LOC115695344/LOC115696400/LOC115699825/LOC115704831/LOC115706583/LOC115706584/LOC115703653/LOC115706748/LOC115705981/LOC115705657/LOC115705197/LOC115706055/LOC115707516/LOC115707422/LOC115705405/LOC115707065/LOC115708199/LOC115705895/LOC115706826/LOC115707364/LOC115707179/LOC115707194/LOC115707278/LOC115707569/LOC115704236/LOC115707916/LOC115707…	121
276	H3K4me3	GO:0090150	establishment of protein localization to membrane	95/11786	109/15562	0.00229094	0.0185517	0.0130187	LOC115702642/LOC115702923/LOC115699346/LOC115700804/LOC115702343/LOC115708202/LOC115711387/LOC115702317/LOC115705836/LOC115708339/LOC115708225/LOC115705207/LOC115708272/LOC115706468/LOC115707764/LOC115704770/LOC115705865/LOC115708159/LOC115705681/LOC115705954/LOC115705926/LOC115706335/LOC115706451/LOC115706557/LOC115706621/LOC115705354/LOC115709112/LOC115711629/LOC115708714/LOC115709966/LOC115710…	95
277	H3K4me3	GO:0000070	mitotic sister chromatid segregation	47/11786	51/15562	0.00239224	0.019302	0.0135453	LOC115703082/LOC115699147/LOC115705997/LOC115706060/LOC115708215/LOC115706772/LOC115707955/LOC115706082/LOC115704754/LOC115704365/LOC115704349/LOC115706898/LOC115707265/LOC115705259/LOC115711381/LOC115711362/LOC115708803/LOC115709353/LOC115711949/LOC115713293/LOC115713067/LOC115714357/LOC115714502/LOC115715634/LOC115717172/LOC115719035/LOC115721311/LOC115720888/LOC115720767/LOC115721250/LOC115721…	47
278	H3K4me3	GO:0090351	seedling development	99/11786	114/15562	0.00242884	0.0195269	0.0137031	LOC115702724/LOC115702725/LOC115702984/LOC115703013/LOC115703251/LOC115717286/LOC115720249/LOC115695464/LOC115695386/LOC115706057/LOC115709176/LOC115712548/LOC115713788/LOC115700855/LOC115702329/LOC115705698/LOC115706211/LOC115704840/LOC115703736/LOC115706355/LOC115706893/LOC115707340/LOC115707473/LOC115707673/LOC115707759/LOC115708255/LOC115705254/LOC115707891/LOC115710181/LOC115709676/LOC115709…	99
279	H3K4me3	GO:0045454	cell redox homeostasis	67/11786	75/15562	0.00248073	0.0198491	0.0139292	LOC115702840/LOC115703028/LOC115702953/LOC115703420/LOC115705652/LOC115707744/LOC115709121/LOC115709151/LOC115713788/LOC115714328/LOC115699671/LOC115696683/LOC115703831/LOC115708315/LOC115705714/LOC115708136/LOC115705874/LOC115706278/LOC115707447/LOC115707749/LOC115707847/LOC115711616/LOC115711336/LOC115711346/LOC115709572/LOC115710638/LOC115712630/LOC115712633/LOC115712631/LOC115714330/LOC115714…	67
280	H3K4me3	GO:0009152	purine ribonucleotide biosynthetic process	81/11786	92/15562	0.00248668	0.0198491	0.0139292	LOC115702850/LOC115724952/LOC115704957/LOC115705607/LOC115708073/LOC115709698/LOC115710101/LOC115710480/LOC115712548/LOC115713640/LOC115702238/LOC115702361/LOC115706092/LOC115707175/LOC115707758/LOC115707664/LOC115705417/LOC115708323/LOC115704842/LOC115705183/LOC115708106/LOC115707930/LOC115705477/LOC115706093/LOC115707018/LOC115707116/LOC115707550/LOC115707697/LOC115704620/LOC115705347/LOC115707…	81
281	H3K4me3	GO:0010017	red or far-red light signaling pathway	29/11786	30/15562	0.00252277	0.0200655	0.014081	LOC115702819/LOC115702833/LOC115695332/LOC115695661/LOC115695269/LOC115695743/LOC115710101/LOC115711038/LOC115700135/LOC115706248/LOC115705128/LOC115705838/LOC115707394/LOC115710333/LOC115714721/LOC115712353/LOC115716057/LOC115719277/LOC115721719/LOC115721945/LOC115695963/LOC115697505/LOC115698130/LOC115697192/LOC115697533/LOC115699078/LOC115699438/LOC115700997/LOC115699015	29
282	H3K4me3	GO:0033014	tetrapyrrole biosynthetic process	57/11786	63/15562	0.00257342	0.0203957	0.0143128	LOC115713909/LOC115722977/LOC115705600/LOC115707736/LOC115695131/LOC115695173/LOC115695432/LOC115697431/LOC115706149/LOC115706892/LOC115705677/LOC115706229/LOC115708039/LOC115709828/LOC115710263/LOC115709045/LOC115709882/LOC115709971/LOC115711336/LOC115711346/LOC115711257/LOC115711605/LOC115709985/LOC115711096/LOC115710087/LOC115714612/LOC115714382/LOC115712654/LOC115716460/LOC115719517/LOC115719…	57
283	H3K4me3	GO:1901701	cellular response to oxygen-containing compound	306/11786	374/15562	0.00263578	0.0208161	0.0146078	LOC115702594/LOC115702674/LOC115702773/LOC115716842/LOC115702817/LOC115702393/LOC115702856/LOC115702896/LOC115702924/LOC115703234/LOC115722899/LOC115720050/LOC115723387/LOC115702467/LOC115702615/LOC115702835/LOC115704142/LOC115704903/LOC115702425/LOC115705842/LOC115706017/LOC115706057/LOC115706351/LOC115706361/LOC115707089/LOC115707344/LOC115709817/LOC115710101/LOC115710644/LOC115710898/LOC115711…	306
284	H3K4me3	GO:0040008	regulation of growth	128/11786	150/15562	0.00268923	0.0211635	0.0148516	LOC115722899/LOC115716751/LOC115716371/LOC115695464/LOC115695386/LOC115704122/LOC115704128/LOC115705226/LOC115709811/LOC115710763/LOC115711048/LOC115714117/LOC115717968/LOC115698371/LOC115698538/LOC115699728/LOC115696506/LOC115700312/LOC115700469/LOC115706462/LOC115706637/LOC115706681/LOC115707656/LOC115703736/LOC115708117/LOC115705746/LOC115706105/LOC115705039/LOC115706213/LOC115707284/LOC115703…	128
285	H3K4me3	GO:0007093	mitotic cell cycle checkpoint signaling	35/11786	37/15562	0.00275492	0.0213793	0.015003	LOC115702671/LOC115703082/LOC115723901/LOC115702797/LOC115699428/LOC115702316/LOC115704754/LOC115704365/LOC115707872/LOC115708656/LOC115709424/LOC115711362/LOC115709043/LOC115715115/LOC115711949/LOC115714937/LOC115713293/LOC115712237/LOC115715784/LOC115715625/LOC115715575/LOC115720767/LOC115718407/LOC115720971/LOC115718397/LOC115718461/LOC115725709/LOC115725368/LOC115725099/LOC115700729/LOC115701…	35
286	H3K4me3	GO:0010224	response to UV-B	35/11786	37/15562	0.00275492	0.0213793	0.015003	LOC115703016/LOC115704053/LOC115708212/LOC115711038/LOC115705581/LOC115705830/LOC115705676/LOC115711657/LOC115708688/LOC115708927/LOC115714640/LOC115712704/LOC115714109/LOC115715084/LOC115712861/LOC115712997/LOC115717036/LOC115716382/LOC115716730/LOC115720780/LOC115719386/LOC115720907/LOC115721082/LOC115720918/LOC115721098/LOC115719599/LOC115719200/LOC115719682/LOC115723235/LOC115695707/LOC115697…	35
287	H3K4me3	GO:0042181	ketone biosynthetic process	35/11786	37/15562	0.00275492	0.0213793	0.015003	LOC115707519/LOC115698174/LOC115703977/LOC115707656/LOC115705402/LOC115706417/LOC115706724/LOC115707284/LOC115708663/LOC115709943/LOC115713047/LOC115713184/LOC115712800/LOC115714294/LOC115715316/LOC115714000/LOC115714001/LOC115715671/LOC115717179/LOC115716151/LOC115721134/LOC115718469/LOC115724170/LOC115723433/LOC115723432/LOC115723378/LOC115694798/LOC115695845/LOC115694755/LOC115697209/LOC115697…	35
288	H3K4me3	GO:0045292	mRNA cis splicing, via spliceosome	35/11786	37/15562	0.00275492	0.0213793	0.015003	LOC115703235/LOC115696283/LOC115696009/LOC115696486/LOC115700176/LOC115705432/LOC115707767/LOC115706268/LOC115706287/LOC115705478/LOC115705922/LOC115706184/LOC115706600/LOC115705305/LOC115709457/LOC115709389/LOC115711708/LOC115713961/LOC115712289/LOC115714058/LOC115715023/LOC115716841/LOC115718181/LOC115720866/LOC115720762/LOC115723141/LOC115695834/LOC115725126/LOC115725578/LOC115698290/LOC115697…	35
289	H3K4me3	GO:0046486	glycerolipid metabolic process	156/11786	185/15562	0.00286536	0.0221595	0.0155505	LOC115703123/LOC115702611/LOC115702729/LOC115708996/LOC115702949/LOC115702962/LOC115702971/LOC115703150/LOC115703157/LOC115703234/LOC115709998/LOC115702965/LOC115703972/LOC115704378/LOC115708276/LOC115709308/LOC115710352/LOC115710976/LOC115722381/LOC115697219/LOC115698229/LOC115705473/LOC115703600/LOC115703789/LOC115705441/LOC115705095/LOC115705879/LOC115705212/LOC115704840/LOC115708316/LOC115704…	156
290	H3K4me3	GO:0000303	response to superoxide	21/11786	21/15562	0.00290698	0.0222503	0.0156143	LOC115702594/LOC115708099/LOC115706606/LOC115704018/LOC115705569/LOC115707994/LOC115711336/LOC115711346/LOC115715697/LOC115716401/LOC115716485/LOC115719020/LOC115720574/LOC115719200/LOC115721697/LOC115723235/LOC115697339/LOC115696903/LOC115696978/LOC115697740/LOC115700608	21
291	H3K4me3	GO:0000305	response to oxygen radical	21/11786	21/15562	0.00290698	0.0222503	0.0156143	LOC115702594/LOC115708099/LOC115706606/LOC115704018/LOC115705569/LOC115707994/LOC115711336/LOC115711346/LOC115715697/LOC115716401/LOC115716485/LOC115719020/LOC115720574/LOC115719200/LOC115721697/LOC115723235/LOC115697339/LOC115696903/LOC115696978/LOC115697740/LOC115700608	21
292	H3K4me3	GO:2000142	regulation of DNA-templated transcription initiation	21/11786	21/15562	0.00290698	0.0222503	0.0156143	LOC115697319/LOC115701199/LOC115706756/LOC115705576/LOC115706196/LOC115707206/LOC115707402/LOC115707539/LOC115707942/LOC115708655/LOC115709363/LOC115715157/LOC115716580/LOC115716684/LOC115716110/LOC115717337/LOC115719601/LOC115718997/LOC115719076/LOC115725232/LOC115700343	21
293	H3K4me3	GO:0005996	monosaccharide metabolic process	119/11786	139/15562	0.00293297	0.0223726	0.0157001	LOC115702659/LOC115702896/LOC115703095/LOC115725581/LOC115699192/LOC115702519/LOC115704241/LOC115704378/LOC115709358/LOC115709914/LOC115711259/LOC115714638/LOC115722202/LOC115697250/LOC115699356/LOC115699982/LOC115700263/LOC115700647/LOC115701945/LOC115704726/LOC115703789/LOC115703794/LOC115706046/LOC115706180/LOC115705568/LOC115705371/LOC115707643/LOC115705552/LOC115706808/LOC115705616/LOC115705…	119
294	H3K4me3	GO:0009123	nucleoside monophosphate metabolic process	66/11786	74/15562	0.0029495	0.0224222	0.0157349	LOC115722977/LOC115702987/LOC115708073/LOC115709638/LOC115710877/LOC115710919/LOC115712548/LOC115713640/LOC115705472/LOC115705471/LOC115706092/LOC115706733/LOC115705417/LOC115707803/LOC115707173/LOC115707140/LOC115707315/LOC115707550/LOC115705290/LOC115709556/LOC115710217/LOC115709908/LOC115709677/LOC115709550/LOC115709549/LOC115712679/LOC115714389/LOC115712577/LOC115714531/LOC115714977/LOC115714…	66
295	H3K4me3	GO:0034248	regulation of cellular amide metabolic process	123/11786	144/15562	0.00299954	0.0227254	0.0159476	LOC115702736/LOC115703071/LOC115703656/LOC115713910/LOC115695344/LOC115696400/LOC115699825/LOC115704831/LOC115706583/LOC115706584/LOC115703653/LOC115706748/LOC115705981/LOC115705657/LOC115705197/LOC115706055/LOC115707516/LOC115707422/LOC115706612/LOC115705405/LOC115707065/LOC115708199/LOC115705895/LOC115706826/LOC115707364/LOC115707179/LOC115707194/LOC115707278/LOC115707569/LOC115704236/LOC115707…	123
296	H3K4me3	GO:0009611	response to wounding	106/11786	123/15562	0.0030643	0.0230786	0.0161955	LOC115702611/LOC115702813/LOC115703002/LOC115703001/LOC115703034/LOC115695287/LOC115702512/LOC115709817/LOC115713988/LOC115697056/LOC115699142/LOC115701091/LOC115701181/LOC115706187/LOC115705837/LOC115707796/LOC115706264/LOC115706751/LOC115706817/LOC115705547/LOC115703585/LOC115706214/LOC115706226/LOC115708174/LOC115708352/LOC115705512/LOC115705838/LOC115705645/LOC115703615/LOC115706097/LOC115706…	106
297	H3K4me3	GO:0009116	nucleoside metabolic process	51/11786	56/15562	0.00306801	0.0230786	0.0161955	LOC115703114/LOC115703131/LOC115703913/LOC115704327/LOC115710101/LOC115710919/LOC115712548/LOC115713640/LOC115698624/LOC115702364/LOC115705163/LOC115705417/LOC115705713/LOC115705873/LOC115706067/LOC115703615/LOC115707188/LOC115707116/LOC115707270/LOC115704624/LOC115708071/LOC115709556/LOC115710333/LOC115709769/LOC115709677/LOC115712679/LOC115712680/LOC115712416/LOC115714036/LOC115716364/LOC115716…	51
298	H3K4me3	GO:0019318	hexose metabolic process	93/11786	107/15562	0.00308103	0.0230786	0.0161955	LOC115702659/LOC115703095/LOC115725581/LOC115702519/LOC115704241/LOC115704378/LOC115709358/LOC115711259/LOC115714638/LOC115722202/LOC115697250/LOC115699982/LOC115700263/LOC115700647/LOC115701945/LOC115703794/LOC115706046/LOC115706180/LOC115705552/LOC115706808/LOC115705616/LOC115705493/LOC115706546/LOC115706706/LOC115707203/LOC115707695/LOC115709179/LOC115709178/LOC115709180/LOC115709036/LOC115708…	93
299	H3K4me3	GO:0140014	mitotic nuclear division	56/11786	62/15562	0.00309779	0.0230786	0.0161955	LOC115703082/LOC115699147/LOC115705997/LOC115706060/LOC115707046/LOC115708215/LOC115706772/LOC115707955/LOC115706082/LOC115704754/LOC115704365/LOC115704349/LOC115706898/LOC115707265/LOC115705259/LOC115711381/LOC115711362/LOC115708803/LOC115709353/LOC115713796/LOC115711949/LOC115713293/LOC115713067/LOC115714357/LOC115714502/LOC115716537/LOC115715634/LOC115717172/LOC115719035/LOC115721311/LOC115720…	56
300	H3K4me3	GO:0140053	mitochondrial gene expression	56/11786	62/15562	0.00309779	0.0230786	0.0161955	LOC115702617/LOC115704488/LOC115701640/LOC115703190/LOC115699825/LOC115706583/LOC115706584/LOC115703653/LOC115706876/LOC115707270/LOC115707497/LOC115704236/LOC115708060/LOC115708743/LOC115709960/LOC115708909/LOC115711373/LOC115709852/LOC115708869/LOC115708890/LOC115710113/LOC115710114/LOC115713027/LOC115714597/LOC115715679/LOC115715675/LOC115716276/LOC115716142/LOC115718643/LOC115721068/LOC115718…	56
301	H3K4me3	GO:0006635	fatty acid beta-oxidation	28/11786	29/15562	0.00323211	0.0238144	0.0167119	LOC115723066/LOC115706299/LOC115708301/LOC115706832/LOC115707261/LOC115707486/LOC115712181/LOC115712180/LOC115714493/LOC115714555/LOC115712927/LOC115715988/LOC115717342/LOC115719179/LOC115720660/LOC115723785/LOC115722526/LOC115722320/LOC115722169/LOC115723201/LOC115696900/LOC115698204/LOC115697235/LOC115699135/LOC115699150/LOC115699414/LOC115702146/LOC115702272	28
302	H3K4me3	GO:0031334	positive regulation of protein-containing complex assembly	28/11786	29/15562	0.00323211	0.0238144	0.0167119	LOC115702784/LOC115702799/LOC115699804/LOC115701199/LOC115706196/LOC115707206/LOC115707402/LOC115707539/LOC115708916/LOC115709989/LOC115712632/LOC115713970/LOC115716110/LOC115719601/LOC115719118/LOC115718997/LOC115718638/LOC115719076/LOC115721065/LOC115722463/LOC115695927/LOC115725691/LOC115694845/LOC115725232/LOC115697983/LOC115700472/LOC115701310/LOC115701459	28
303	H3K4me3	GO:0046128	purine ribonucleoside metabolic process	28/11786	29/15562	0.00323211	0.0238144	0.0167119	LOC115703114/LOC115703131/LOC115703913/LOC115710101/LOC115712548/LOC115713640/LOC115698624/LOC115705163/LOC115705417/LOC115707116/LOC115707270/LOC115704624/LOC115710333/LOC115709677/LOC115712679/LOC115712416/LOC115716364/LOC115716800/LOC115716958/LOC115716183/LOC115720686/LOC115722730/LOC115722830/LOC115721913/LOC115721871/LOC115725611/LOC115699586/LOC115702122	28
304	H3K4me3	GO:0009894	regulation of catabolic process	114/11786	133/15562	0.00326389	0.0238144	0.0167119	LOC115702597/LOC115702736/LOC115701559/LOC115702795/LOC115702809/LOC115702908/LOC115702924/LOC115703165/LOC115722899/LOC115702566/LOC115703071/LOC115704249/LOC115697670/LOC115697677/LOC115700278/LOC115708098/LOC115707805/LOC115703789/LOC115706748/LOC115705197/LOC115706055/LOC115705109/LOC115705405/LOC115705079/LOC115703864/LOC115707364/LOC115708302/LOC115707352/LOC115707916/LOC115709390/LOC115709…	114
305	H3K4me3	GO:0009742	brassinosteroid mediated signaling pathway	40/11786	43/15562	0.0032818	0.0238144	0.0167119	LOC115722899/LOC115720050/LOC115702467/LOC115702615/LOC115705842/LOC115706017/LOC115712441/LOC115713972/LOC115700469/LOC115706010/LOC115708164/LOC115706523/LOC115706839/LOC115709598/LOC115711536/LOC115710209/LOC115711408/LOC115714993/LOC115712674/LOC115713939/LOC115714441/LOC115717645/LOC115715983/LOC115716204/LOC115717124/LOC115717323/LOC115715972/LOC115715971/LOC115719192/LOC115721183/LOC115725…	40
306	H3K4me3	GO:0043401	steroid hormone mediated signaling pathway	40/11786	43/15562	0.0032818	0.0238144	0.0167119	LOC115722899/LOC115720050/LOC115702467/LOC115702615/LOC115705842/LOC115706017/LOC115712441/LOC115713972/LOC115700469/LOC115706010/LOC115708164/LOC115706523/LOC115706839/LOC115709598/LOC115711536/LOC115710209/LOC115711408/LOC115714993/LOC115712674/LOC115713939/LOC115714441/LOC115717645/LOC115715983/LOC115716204/LOC115717124/LOC115717323/LOC115715972/LOC115715971/LOC115719192/LOC115721183/LOC115725…	40
307	H3K4me3	GO:0048545	response to steroid hormone	40/11786	43/15562	0.0032818	0.0238144	0.0167119	LOC115722899/LOC115720050/LOC115702467/LOC115702615/LOC115705842/LOC115706017/LOC115712441/LOC115713972/LOC115700469/LOC115706010/LOC115708164/LOC115706523/LOC115706839/LOC115709598/LOC115711536/LOC115710209/LOC115711408/LOC115714993/LOC115712674/LOC115713939/LOC115714441/LOC115717645/LOC115715983/LOC115716204/LOC115717124/LOC115717323/LOC115715972/LOC115715971/LOC115719192/LOC115721183/LOC115725…	40
308	H3K4me3	GO:0071383	cellular response to steroid hormone stimulus	40/11786	43/15562	0.0032818	0.0238144	0.0167119	LOC115722899/LOC115720050/LOC115702467/LOC115702615/LOC115705842/LOC115706017/LOC115712441/LOC115713972/LOC115700469/LOC115706010/LOC115708164/LOC115706523/LOC115706839/LOC115709598/LOC115711536/LOC115710209/LOC115711408/LOC115714993/LOC115712674/LOC115713939/LOC115714441/LOC115717645/LOC115715983/LOC115716204/LOC115717124/LOC115717323/LOC115715972/LOC115715971/LOC115719192/LOC115721183/LOC115725…	40
309	H3K4me3	GO:0016556	mRNA modification	34/11786	36/15562	0.00345968	0.0247833	0.0173918	LOC115709536/LOC115710828/LOC115712251/LOC115712356/LOC115712383/LOC115700459/LOC115704781/LOC115704380/LOC115704423/LOC115704106/LOC115706614/LOC115709249/LOC115709428/LOC115710249/LOC115710275/LOC115716847/LOC115716142/LOC115716250/LOC115718572/LOC115719360/LOC115721047/LOC115718562/LOC115721120/LOC115721710/LOC115722897/LOC115722292/LOC115721911/LOC115722506/LOC115694772/LOC115724959/LOC115725…	34
310	H3K4me3	GO:0044089	positive regulation of cellular component biogenesis	34/11786	36/15562	0.00345968	0.0247833	0.0173918	LOC115702784/LOC115702799/LOC115722899/LOC115699804/LOC115701199/LOC115704795/LOC115706196/LOC115707206/LOC115707402/LOC115707539/LOC115708916/LOC115709989/LOC115712632/LOC115713970/LOC115712505/LOC115715739/LOC115716110/LOC115719125/LOC115719601/LOC115719118/LOC115718997/LOC115718638/LOC115719076/LOC115721065/LOC115722463/LOC115695927/LOC115725691/LOC115694845/LOC115725232/LOC115697983/LOC115700…	34
311	H3K4me3	GO:1901661	quinone metabolic process	34/11786	36/15562	0.00345968	0.0247833	0.0173918	LOC115707519/LOC115698174/LOC115703977/LOC115707656/LOC115705402/LOC115706417/LOC115706724/LOC115707284/LOC115708663/LOC115709943/LOC115713047/LOC115713184/LOC115712800/LOC115714294/LOC115715316/LOC115714000/LOC115714001/LOC115715671/LOC115717179/LOC115716151/LOC115721134/LOC115718469/LOC115723433/LOC115723432/LOC115723378/LOC115694798/LOC115695845/LOC115694755/LOC115697209/LOC115697919/LOC115701…	34
312	H3K4me3	GO:1901663	quinone biosynthetic process	34/11786	36/15562	0.00345968	0.0247833	0.0173918	LOC115707519/LOC115698174/LOC115703977/LOC115707656/LOC115705402/LOC115706417/LOC115706724/LOC115707284/LOC115708663/LOC115709943/LOC115713047/LOC115713184/LOC115712800/LOC115714294/LOC115715316/LOC115714000/LOC115714001/LOC115715671/LOC115717179/LOC115716151/LOC115721134/LOC115718469/LOC115723433/LOC115723432/LOC115723378/LOC115694798/LOC115695845/LOC115694755/LOC115697209/LOC115697919/LOC115701…	34
313	H3K4me3	GO:0042742	defense response to bacterium	205/11786	247/15562	0.00352863	0.0251965	0.0176817	LOC115702597/LOC115702780/LOC115702804/LOC115702822/LOC115702823/LOC115702829/LOC115702830/LOC115704434/LOC115703193/LOC115703234/LOC115715228/LOC115716590/LOC115695922/LOC115695831/LOC115702467/LOC115703620/LOC115703727/LOC115709257/LOC115704142/LOC115704957/LOC115707089/LOC115709698/LOC115713972/LOC115695001/LOC115699852/LOC115700469/LOC115702162/LOC115702189/LOC115702329/LOC115702351/LOC115702…	205
314	H3K4me3	GO:1903311	regulation of mRNA metabolic process	92/11786	106/15562	0.00356654	0.025386	0.0178148	LOC115702599/LOC115702736/LOC115702792/LOC115715318/LOC115696283/LOC115696009/LOC115703071/LOC115704249/LOC115712402/LOC115700176/LOC115706268/LOC115706748/LOC115705197/LOC115706055/LOC115705405/LOC115705478/LOC115705553/LOC115705922/LOC115706160/LOC115706184/LOC115706600/LOC115707364/LOC115705305/LOC115707916/LOC115709390/LOC115709250/LOC115710188/LOC115709629/LOC115710249/LOC115710191/LOC115709…	92
315	H3K4me3	GO:0000209	protein polyubiquitination	60/11786	67/15562	0.00364224	0.0258426	0.0181352	LOC115703165/LOC115697670/LOC115697677/LOC115699147/LOC115700278/LOC115706324/LOC115705997/LOC115706060/LOC115705855/LOC115707955/LOC115705109/LOC115705079/LOC115705996/LOC115703864/LOC115706472/LOC115706898/LOC115707195/LOC115707352/LOC115708815/LOC115711419/LOC115711412/LOC115709645/LOC115709310/LOC115714365/LOC115712217/LOC115712237/LOC115714462/LOC115714461/LOC115714654/LOC115715137/LOC115716…	60
316	H3K4me3	GO:0009064	glutamine family amino acid metabolic process	74/11786	84/15562	0.00367138	0.0259668	0.0182224	LOC115702934/LOC115703222/LOC115703228/LOC115706428/LOC115708064/LOC115710665/LOC115710723/LOC115697874/LOC115697888/LOC115699837/LOC115700479/LOC115705444/LOC115705168/LOC115705451/LOC115706025/LOC115705619/LOC115705524/LOC115706623/LOC115706405/LOC115707623/LOC115707857/LOC115707925/LOC115710204/LOC115710158/LOC115711475/LOC115710039/LOC115710038/LOC115711993/LOC115712923/LOC115712924/LOC115713…	74
317	H3K4me3	GO:0009073	aromatic amino acid family biosynthetic process	50/11786	55/15562	0.0037172	0.0261256	0.0183338	LOC115702672/LOC115706017/LOC115706057/LOC115710665/LOC115699522/LOC115706187/LOC115705837/LOC115706741/LOC115703598/LOC115705595/LOC115705599/LOC115707802/LOC115707881/LOC115708000/LOC115709272/LOC115709912/LOC115711577/LOC115714346/LOC115712503/LOC115712504/LOC115715024/LOC115715573/LOC115715692/LOC115717061/LOC115716691/LOC115716894/LOC115719371/LOC115719519/LOC115718896/LOC115721090/LOC115719…	50
318	H3K4me3	GO:0070972	protein localization to endoplasmic reticulum	50/11786	55/15562	0.0037172	0.0261256	0.0183338	LOC115702727/LOC115702737/LOC115702753/LOC115702754/LOC115702343/LOC115704352/LOC115704344/LOC115702407/LOC115711387/LOC115698324/LOC115700972/LOC115702317/LOC115708339/LOC115708225/LOC115706482/LOC115706468/LOC115704770/LOC115705681/LOC115706546/LOC115706557/LOC115706621/LOC115703577/LOC115707730/LOC115711629/LOC115708714/LOC115708660/LOC115709966/LOC115710075/LOC115712636/LOC115715012/LOC115711…	50
319	H3K4me3	GO:0007602	phototransduction	20/11786	20/15562	0.0038399	0.0262452	0.0184177	LOC115695661/LOC115695743/LOC115710101/LOC115711038/LOC115700135/LOC115705838/LOC115707394/LOC115710333/LOC115714721/LOC115716057/LOC115719277/LOC115721719/LOC115695963/LOC115698130/LOC115697192/LOC115697533/LOC115699078/LOC115699438/LOC115700997/LOC115699015	20
320	H3K4me3	GO:0009583	detection of light stimulus	20/11786	20/15562	0.0038399	0.0262452	0.0184177	LOC115695661/LOC115695743/LOC115710101/LOC115711038/LOC115700135/LOC115705838/LOC115707394/LOC115710333/LOC115714721/LOC115716057/LOC115719277/LOC115721719/LOC115695963/LOC115698130/LOC115697192/LOC115697533/LOC115699078/LOC115699438/LOC115700997/LOC115699015	20
321	H3K4me3	GO:0009585	red, far-red light phototransduction	20/11786	20/15562	0.0038399	0.0262452	0.0184177	LOC115695661/LOC115695743/LOC115710101/LOC115711038/LOC115700135/LOC115705838/LOC115707394/LOC115710333/LOC115714721/LOC115716057/LOC115719277/LOC115721719/LOC115695963/LOC115698130/LOC115697192/LOC115697533/LOC115699078/LOC115699438/LOC115700997/LOC115699015	20
322	H3K4me3	GO:0019430	removal of superoxide radicals	20/11786	20/15562	0.0038399	0.0262452	0.0184177	LOC115702594/LOC115708099/LOC115706606/LOC115704018/LOC115705569/LOC115707994/LOC115711336/LOC115711346/LOC115715697/LOC115716401/LOC115716485/LOC115719020/LOC115720574/LOC115719200/LOC115721697/LOC115723235/LOC115697339/LOC115696903/LOC115696978/LOC115700608	20
323	H3K4me3	GO:0030071	regulation of mitotic metaphase/anaphase transition	20/11786	20/15562	0.0038399	0.0262452	0.0184177	LOC115703082/LOC115699147/LOC115707955/LOC115706082/LOC115704754/LOC115704365/LOC115706898/LOC115711362/LOC115709353/LOC115711949/LOC115713293/LOC115720767/LOC115721249/LOC115718402/LOC115721782/LOC115725099/LOC115697930/LOC115701502/LOC115698819/LOC115699664	20
324	H3K4me3	GO:0051054	positive regulation of DNA metabolic process	20/11786	20/15562	0.0038399	0.0262452	0.0184177	LOC115703080/LOC115703544/LOC115705615/LOC115711167/LOC115706223/LOC115710064/LOC115714083/LOC115717070/LOC115717036/LOC115715993/LOC115716869/LOC115716474/LOC115719474/LOC115719230/LOC115721391/LOC115722372/LOC115723771/LOC115725590/LOC115696291/LOC115700480	20
325	H3K4me3	GO:0071450	cellular response to oxygen radical	20/11786	20/15562	0.0038399	0.0262452	0.0184177	LOC115702594/LOC115708099/LOC115706606/LOC115704018/LOC115705569/LOC115707994/LOC115711336/LOC115711346/LOC115715697/LOC115716401/LOC115716485/LOC115719020/LOC115720574/LOC115719200/LOC115721697/LOC115723235/LOC115697339/LOC115696903/LOC115696978/LOC115700608	20
326	H3K4me3	GO:0071451	cellular response to superoxide	20/11786	20/15562	0.0038399	0.0262452	0.0184177	LOC115702594/LOC115708099/LOC115706606/LOC115704018/LOC115705569/LOC115707994/LOC115711336/LOC115711346/LOC115715697/LOC115716401/LOC115716485/LOC115719020/LOC115720574/LOC115719200/LOC115721697/LOC115723235/LOC115697339/LOC115696903/LOC115696978/LOC115700608	20
327	H3K4me3	GO:1902099	regulation of metaphase/anaphase transition of cell cycle	20/11786	20/15562	0.0038399	0.0262452	0.0184177	LOC115703082/LOC115699147/LOC115707955/LOC115706082/LOC115704754/LOC115704365/LOC115706898/LOC115711362/LOC115709353/LOC115711949/LOC115713293/LOC115720767/LOC115721249/LOC115718402/LOC115721782/LOC115725099/LOC115697930/LOC115701502/LOC115698819/LOC115699664	20
328	H3K4me3	GO:0000956	nuclear-transcribed mRNA catabolic process	69/11786	78/15562	0.00392223	0.0267262	0.0187552	LOC115702736/LOC115703195/LOC115696485/LOC115694915/LOC115697784/LOC115696655/LOC115695062/LOC115697868/LOC115703071/LOC115703796/LOC115709368/LOC115695344/LOC115706264/LOC115706748/LOC115706139/LOC115708273/LOC115705405/LOC115708306/LOC115705625/LOC115708113/LOC115705942/LOC115707364/LOC115707118/LOC115707231/LOC115707916/LOC115709394/LOC115713457/LOC115711981/LOC115715834/LOC115718149/LOC115716…	69
329	H3K4me3	GO:0001510	RNA methylation	78/11786	89/15562	0.00398898	0.0269346	0.0189015	LOC115703081/LOC115702434/LOC115705920/LOC115703913/LOC115704514/LOC115700459/LOC115706782/LOC115705236/LOC115707790/LOC115708179/LOC115705537/LOC115706751/LOC115706208/LOC115707541/LOC115706059/LOC115706094/LOC115707168/LOC115706614/LOC115707878/LOC115707270/LOC115707586/LOC115711464/LOC115708829/LOC115711640/LOC115710249/LOC115708844/LOC115711248/LOC115712546/LOC115713027/LOC115714649/LOC115715…	78
330	H3K4me3	GO:0022411	cellular component disassembly	78/11786	89/15562	0.00398898	0.0269346	0.0189015	LOC115702674/LOC115702784/LOC115702799/LOC115713003/LOC115716371/LOC115722977/LOC115702566/LOC115704651/LOC115712375/LOC115712383/LOC115724500/LOC115699818/LOC115703830/LOC115704024/LOC115706539/LOC115703595/LOC115707830/LOC115709618/LOC115709883/LOC115711537/LOC115711565/LOC115711136/LOC115709394/LOC115709962/LOC115710014/LOC115709152/LOC115712587/LOC115712807/LOC115714084/LOC115714546/LOC115714…	78
331	H3K4me3	GO:0031047	gene silencing by RNA	78/11786	89/15562	0.00398898	0.0269346	0.0189015	LOC115703251/LOC115704391/LOC115699522/LOC115705691/LOC115703649/LOC115703950/LOC115705095/LOC115705141/LOC115705449/LOC115705817/LOC115706055/LOC115705637/LOC115705577/LOC115706160/LOC115706636/LOC115707914/LOC115707922/LOC115708792/LOC115709629/LOC115709646/LOC115708696/LOC115709770/LOC115709746/LOC115709347/LOC115711193/LOC115712688/LOC115714148/LOC115713457/LOC115711981/LOC115714129/LOC115714…	78
332	H3K4me3	GO:0008154	actin polymerization or depolymerization	39/11786	42/15562	0.0040576	0.0273155	0.0191687	LOC115702674/LOC115702784/LOC115702799/LOC115704651/LOC115712375/LOC115712383/LOC115724500/LOC115704024/LOC115708174/LOC115705229/LOC115708352/LOC115705709/LOC115706539/LOC115707552/LOC115710153/LOC115708721/LOC115708916/LOC115709989/LOC115709883/LOC115711537/LOC115709962/LOC115710014/LOC115712632/LOC115713970/LOC115713013/LOC115714208/LOC115717561/LOC115716654/LOC115716124/LOC115719118/LOC115720…	39
333	H3K4me3	GO:0051156	glucose 6-phosphate metabolic process	27/11786	28/15562	0.00413679	0.027765	0.0194842	LOC115711259/LOC115701945/LOC115705596/LOC115705598/LOC115705825/LOC115707547/LOC115709259/LOC115709910/LOC115709294/LOC115712571/LOC115712109/LOC115714036/LOC115713973/LOC115716318/LOC115716649/LOC115716555/LOC115716152/LOC115718581/LOC115719345/LOC115720624/LOC115724757/LOC115696870/LOC115699917/LOC115701244/LOC115701276/LOC115699660/LOC115699491	27
334	H3K4me3	GO:0051130	positive regulation of cellular component organization	64/11786	72/15562	0.00415196	0.0277834	0.0194971	LOC115702784/LOC115702799/LOC115699804/LOC115699147/LOC115701199/LOC115705198/LOC115706608/LOC115706681/LOC115706082/LOC115705665/LOC115705670/LOC115706196/LOC115706898/LOC115707206/LOC115707295/LOC115707402/LOC115707539/LOC115708916/LOC115710221/LOC115709989/LOC115709353/LOC115709962/LOC115710014/LOC115712632/LOC115713970/LOC115712807/LOC115714012/LOC115712505/LOC115713791/LOC115713887/LOC115715…	64
335	H3K4me3	GO:0010256	endomembrane system organization	82/11786	94/15562	0.00427629	0.0285299	0.020021	LOC115705660/LOC115704030/LOC115709591/LOC115714343/LOC115697109/LOC115697487/LOC115697495/LOC115706048/LOC115706611/LOC115705207/LOC115708261/LOC115705466/LOC115706131/LOC115704904/LOC115704960/LOC115705858/LOC115706980/LOC115705492/LOC115706243/LOC115705777/LOC115705839/LOC115708236/LOC115705957/LOC115706621/LOC115706947/LOC115707137/LOC115707180/LOC115707408/LOC115707542/LOC115707143/LOC115709…	82
336	H3K4me3	GO:0000460	maturation of 5.8S rRNA	33/11786	35/15562	0.00433896	0.0287905	0.0202039	LOC115703071/LOC115699576/LOC115708074/LOC115710192/LOC115711500/LOC115713075/LOC115713019/LOC115714649/LOC115717511/LOC115715834/LOC115718149/LOC115715636/LOC115717042/LOC115719110/LOC115721169/LOC115722268/LOC115695946/LOC115725582/LOC115725186/LOC115694746/LOC115696968/LOC115698256/LOC115697840/LOC115698115/LOC115700707/LOC115700561/LOC115699110/LOC115701141/LOC115699074/LOC115700462/LOC115699…	33
337	H3K4me3	GO:0022406	membrane docking	44/11786	48/15562	0.00437976	0.0287905	0.0202039	LOC115702605/LOC115705833/LOC115706299/LOC115708838/LOC115699031/LOC115708180/LOC115708162/LOC115708261/LOC115707485/LOC115705777/LOC115705839/LOC115705939/LOC115705926/LOC115705009/LOC115706451/LOC115706885/LOC115710297/LOC115714478/LOC115716740/LOC115716424/LOC115715729/LOC115717103/LOC115715623/LOC115716350/LOC115718939/LOC115719647/LOC115718523/LOC115722164/LOC115722128/LOC115722780/LOC115723…	44
338	H3K4me3	GO:0030490	maturation of SSU-rRNA	44/11786	48/15562	0.00437976	0.0287905	0.0202039	LOC115702948/LOC115705135/LOC115706767/LOC115703908/LOC115705943/LOC115706962/LOC115707739/LOC115705252/LOC115708027/LOC115710297/LOC115709420/LOC115710250/LOC115714823/LOC115712976/LOC115716770/LOC115716650/LOC115717511/LOC115716774/LOC115720655/LOC115721151/LOC115721168/LOC115719675/LOC115722452/LOC115722382/LOC115722941/LOC115721996/LOC115723138/LOC115695946/LOC115725129/LOC115725370/LOC115695…	44
339	H3K4me3	GO:0070918	small regulatory ncRNA processing	44/11786	48/15562	0.00437976	0.0287905	0.0202039	LOC115704391/LOC115699522/LOC115703950/LOC115705095/LOC115705449/LOC115705817/LOC115706055/LOC115705637/LOC115706160/LOC115706636/LOC115708792/LOC115709629/LOC115709646/LOC115709347/LOC115714129/LOC115715293/LOC115716447/LOC115716262/LOC115716698/LOC115716551/LOC115720772/LOC115721436/LOC115721036/LOC115719176/LOC115720866/LOC115719410/LOC115719377/LOC115719400/LOC115724100/LOC115724094/LOC115722…	44
340	H3K4me3	GO:0140056	organelle localization by membrane tethering	44/11786	48/15562	0.00437976	0.0287905	0.0202039	LOC115702605/LOC115705833/LOC115706299/LOC115708838/LOC115699031/LOC115708180/LOC115708162/LOC115708261/LOC115707485/LOC115705777/LOC115705839/LOC115705939/LOC115705926/LOC115705009/LOC115706451/LOC115706885/LOC115710297/LOC115714478/LOC115716740/LOC115716424/LOC115715729/LOC115717103/LOC115715623/LOC115716350/LOC115718939/LOC115719647/LOC115718523/LOC115722164/LOC115722128/LOC115722780/LOC115723…	44
341	H3K4me3	GO:0072528	pyrimidine-containing compound biosynthetic process	54/11786	60/15562	0.00446911	0.0292917	0.0205556	LOC115703157/LOC115709998/LOC115696485/LOC115694915/LOC115698051/LOC115696655/LOC115695062/LOC115708064/LOC115710101/LOC115710877/LOC115703600/LOC115706733/LOC115706703/LOC115705524/LOC115704902/LOC115707803/LOC115707217/LOC115705751/LOC115707173/LOC115707116/LOC115707375/LOC115704571/LOC115709556/LOC115710333/LOC115709908/LOC115709893/LOC115711604/LOC115714531/LOC115714977/LOC115714382/LOC115714…	54
342	H3K4me3	GO:0044087	regulation of cellular component biogenesis	86/11786	99/15562	0.00453347	0.0296266	0.0207906	LOC115702674/LOC115702784/LOC115702799/LOC115722899/LOC115704956/LOC115699804/LOC115702715/LOC115710554/LOC115712375/LOC115712383/LOC115713775/LOC115701199/LOC115704795/LOC115705657/LOC115706612/LOC115708174/LOC115705229/LOC115708352/LOC115705709/LOC115706119/LOC115707553/LOC115706196/LOC115707041/LOC115707206/LOC115707402/LOC115707539/LOC115707552/LOC115705247/LOC115708916/LOC115711529/LOC115709…	86
343	H3K4me3	GO:0048585	negative regulation of response to stimulus	103/11786	120/15562	0.00461767	0.0300889	0.021115	LOC115702817/LOC115702393/LOC115703195/LOC115722899/LOC115697104/LOC115702615/LOC115703620/LOC115705210/LOC115705842/LOC115706017/LOC115707089/LOC115707344/LOC115707998/LOC115709817/LOC115710898/LOC115711315/LOC115711709/LOC115712441/LOC115717968/LOC115722139/LOC115705433/LOC115705123/LOC115705128/LOC115708259/LOC115705449/LOC115705534/LOC115705569/LOC115705155/LOC115705838/LOC115705952/LOC115706…	103
344	H3K4me3	GO:0048316	seed development	378/11786	468/15562	0.0049705	0.0322938	0.0226623	LOC115702667/LOC115702702/LOC115702708/LOC115702724/LOC115702725/LOC115702808/LOC115702861/LOC115702918/LOC115723648/LOC115702964/LOC115702984/LOC115702986/LOC115703012/LOC115703013/LOC115703078/LOC115703105/LOC115703141/LOC115722899/LOC115695287/LOC115705744/LOC115723387/LOC115694915/LOC115695062/LOC115701640/LOC115702835/LOC115703061/LOC115703727/LOC115704558/LOC115704719/LOC115704704/LOC115706…	378
345	H3K4me3	GO:0045787	positive regulation of cell cycle	38/11786	41/15562	0.00500928	0.0324514	0.0227729	LOC115703080/LOC115699147/LOC115699911/LOC115700579/LOC115705653/LOC115706082/LOC115705665/LOC115705670/LOC115706898/LOC115709353/LOC115714012/LOC115715173/LOC115715324/LOC115712107/LOC115712943/LOC115713887/LOC115717328/LOC115715993/LOC115716869/LOC115719558/LOC115718402/LOC115724098/LOC115721782/LOC115723078/LOC115724469/LOC115694713/LOC115725590/LOC115697930/LOC115696949/LOC115697419/LOC115697…	38
346	H3K4me3	GO:0042762	regulation of sulfur metabolic process	19/11786	19/15562	0.00507212	0.0325752	0.0228598	LOC115699125/LOC115705155/LOC115709838/LOC115711687/LOC115709894/LOC115708881/LOC115714740/LOC115715124/LOC115715803/LOC115716089/LOC115719373/LOC115724089/LOC115723252/LOC115725589/LOC115696866/LOC115697318/LOC115697430/LOC115699474/LOC115701335	19
347	H3K4me3	GO:0051307	meiotic chromosome separation	19/11786	19/15562	0.00507212	0.0325752	0.0228598	LOC115703121/LOC115703167/LOC115706429/LOC115705680/LOC115705795/LOC115708656/LOC115709424/LOC115708746/LOC115709720/LOC115713985/LOC115712072/LOC115715993/LOC115716869/LOC115716070/LOC115716894/LOC115695791/LOC115694687/LOC115701370/LOC115699664	19
348	H3K4me3	GO:0080156	mitochondrial mRNA modification	19/11786	19/15562	0.00507212	0.0325752	0.0228598	LOC115709536/LOC115712251/LOC115712356/LOC115704380/LOC115704423/LOC115709249/LOC115710275/LOC115716142/LOC115718572/LOC115719360/LOC115721047/LOC115718562/LOC115721710/LOC115722897/LOC115721911/LOC115722506/LOC115694772/LOC115725696/LOC115701501	19
349	H3K4me3	GO:0019725	cellular homeostasis	182/11786	219/15562	0.00516925	0.0330133	0.0231672	LOC115702840/LOC115703028/LOC115702953/LOC115703009/LOC115703159/LOC115722899/LOC115712199/LOC115703420/LOC115705652/LOC115707744/LOC115709121/LOC115709151/LOC115710743/LOC115713788/LOC115714328/LOC115722139/LOC115698883/LOC115699671/LOC115700067/LOC115700197/LOC115700416/LOC115696683/LOC115703214/LOC115701945/LOC115703831/LOC115703859/LOC115704015/LOC115708315/LOC115705714/LOC115708136/LOC115706…	182
350	H3K4me3	GO:0000096	sulfur amino acid metabolic process	58/11786	65/15562	0.00516986	0.0330133	0.0231672	LOC115702618/LOC115702630/LOC115702983/LOC115703014/LOC115713573/LOC115715228/LOC115703995/LOC115699125/LOC115706332/LOC115705658/LOC115706566/LOC115706479/LOC115705662/LOC115703573/LOC115706293/LOC115707895/LOC115704710/LOC115707749/LOC115708041/LOC115708085/LOC115709268/LOC115710211/LOC115712805/LOC115712011/LOC115714998/LOC115717307/LOC115719426/LOC115718986/LOC115721145/LOC115718912/LOC115719…	58
351	H3K4me3	GO:0009845	seed germination	85/11786	98/15562	0.00524751	0.0333932	0.0234338	LOC115702724/LOC115702725/LOC115702984/LOC115703013/LOC115703251/LOC115717286/LOC115720249/LOC115695464/LOC115695386/LOC115706057/LOC115709176/LOC115712548/LOC115713788/LOC115700855/LOC115705698/LOC115706211/LOC115704840/LOC115706893/LOC115707340/LOC115707473/LOC115707673/LOC115707759/LOC115708255/LOC115705254/LOC115707891/LOC115710181/LOC115709676/LOC115710197/LOC115711545/LOC115708807/LOC115709…	85
352	H3K4me3	GO:0000387	spliceosomal snRNP assembly	26/11786	27/15562	0.00528913	0.0333932	0.0234338	LOC115697784/LOC115697868/LOC115702657/LOC115713809/LOC115713831/LOC115698158/LOC115703859/LOC115705219/LOC115705407/LOC115706194/LOC115705238/LOC115708938/LOC115712992/LOC115714500/LOC115714378/LOC115723141/LOC115723048/LOC115723284/LOC115695693/LOC115724493/LOC115697945/LOC115698095/LOC115701124/LOC115699421/LOC115701386/LOC115700876	26
353	H3K4me3	GO:0032507	maintenance of protein location in cell	26/11786	27/15562	0.00528913	0.0333932	0.0234338	LOC115702727/LOC115702737/LOC115702753/LOC115702754/LOC115704352/LOC115704344/LOC115702407/LOC115698324/LOC115700972/LOC115706048/LOC115708174/LOC115705229/LOC115708352/LOC115705709/LOC115703577/LOC115707552/LOC115714144/LOC115715105/LOC115714825/LOC115712875/LOC115716431/LOC115716091/LOC115720723/LOC115723397/LOC115697781/LOC115699700	26
354	H3K4me3	GO:0045185	maintenance of protein location	26/11786	27/15562	0.00528913	0.0333932	0.0234338	LOC115702727/LOC115702737/LOC115702753/LOC115702754/LOC115704352/LOC115704344/LOC115702407/LOC115698324/LOC115700972/LOC115706048/LOC115708174/LOC115705229/LOC115708352/LOC115705709/LOC115703577/LOC115707552/LOC115714144/LOC115715105/LOC115714825/LOC115712875/LOC115716431/LOC115716091/LOC115720723/LOC115723397/LOC115697781/LOC115699700	26
355	H3K4me3	GO:0000959	mitochondrial RNA metabolic process	43/11786	47/15562	0.00534167	0.03363	0.0236	LOC115702617/LOC115704488/LOC115701640/LOC115709536/LOC115712251/LOC115712356/LOC115704380/LOC115704423/LOC115707270/LOC115707497/LOC115708743/LOC115709960/LOC115709249/LOC115710275/LOC115713027/LOC115716142/LOC115718572/LOC115719360/LOC115721068/LOC115721047/LOC115718630/LOC115719039/LOC115718562/LOC115721710/LOC115722897/LOC115722309/LOC115721911/LOC115722506/LOC115722551/LOC115725448/LOC115694…	43
356	H3K4me3	GO:0006304	DNA modification	48/11786	53/15562	0.00543175	0.034101	0.0239305	LOC115716590/LOC115725500/LOC115702987/LOC115710463/LOC115711167/LOC115697752/LOC115699010/LOC115699522/LOC115700459/LOC115700865/LOC115703950/LOC115705577/LOC115706114/LOC115704892/LOC115705294/LOC115708999/LOC115709402/LOC115713936/LOC115712505/LOC115712625/LOC115713457/LOC115711981/LOC115712154/LOC115713791/LOC115714399/LOC115714447/LOC115715026/LOC115712558/LOC115717183/LOC115717005/LOC115719…	48
357	H3K4me3	GO:0051604	protein maturation	89/11786	103/15562	0.00549074	0.0343748	0.0241227	LOC115702913/LOC115703144/LOC115710389/LOC115703744/LOC115708757/LOC115710440/LOC115718911/LOC115699243/LOC115699812/LOC115699901/LOC115705189/LOC115706482/LOC115703947/LOC115705986/LOC115705715/LOC115704985/LOC115705515/LOC115705482/LOC115706413/LOC115705747/LOC115705797/LOC115704318/LOC115706554/LOC115706415/LOC115706544/LOC115706722/LOC115707174/LOC115707533/LOC115707559/LOC115705251/LOC115710…	89
358	H3K4me3	GO:0009553	embryo sac development	80/11786	92/15562	0.00576861	0.0360135	0.0252727	LOC115703110/LOC115703140/LOC115720436/LOC115709986/LOC115714167/LOC115705653/LOC115704008/LOC115706132/LOC115708109/LOC115707516/LOC115706380/LOC115706010/LOC115703644/LOC115706950/LOC115705252/LOC115708886/LOC115709646/LOC115709598/LOC115710026/LOC115711076/LOC115712983/LOC115714772/LOC115711922/LOC115712153/LOC115714057/LOC115714154/LOC115714850/LOC115714246/LOC115712892/LOC115717019/LOC115716…	80
359	H3K4me3	GO:0042157	lipoprotein metabolic process	71/11786	81/15562	0.0059055	0.0367654	0.0258003	LOC115702642/LOC115717286/LOC115702566/LOC115702965/LOC115708276/LOC115708202/LOC115698229/LOC115703830/LOC115705836/LOC115705095/LOC115707577/LOC115703955/LOC115707764/LOC115708159/LOC115705608/LOC115705954/LOC115706335/LOC115707216/LOC115707378/LOC115707379/LOC115707830/LOC115708821/LOC115711507/LOC115709112/LOC115709641/LOC115711671/LOC115708709/LOC115712379/LOC115714585/LOC115714113/LOC115714…	71
360	H3K4me3	GO:0006081	cellular aldehyde metabolic process	57/11786	64/15562	0.00614515	0.0381512	0.0267727	LOC115702934/LOC115703163/LOC115704378/LOC115705564/LOC115707863/LOC115710644/LOC115714030/LOC115705544/LOC115706046/LOC115706180/LOC115704205/LOC115705451/LOC115706478/LOC115705619/LOC115706190/LOC115706866/LOC115705116/LOC115707793/LOC115707858/LOC115709372/LOC115710131/LOC115710107/LOC115712756/LOC115712229/LOC115715183/LOC115712915/LOC115717442/LOC115716320/LOC115716460/LOC115716052/LOC115721…	57
361	H3K4me3	GO:0009668	plastid membrane organization	37/11786	40/15562	0.0061745	0.0382272	0.0268261	LOC115713415/LOC115716371/LOC115702343/LOC115703620/LOC115706057/LOC115697431/LOC115699812/LOC115699901/LOC115702322/LOC115702350/LOC115705189/LOC115705441/LOC115703578/LOC115707240/LOC115705722/LOC115706526/LOC115708039/LOC115708751/LOC115711256/LOC115711506/LOC115712478/LOC115713070/LOC115716726/LOC115718490/LOC115720958/LOC115722804/LOC115723448/LOC115725636/LOC115724518/LOC115695660/LOC115695…	37
362	H3K4me3	GO:0015931	nucleobase-containing compound transport	141/11786	168/15562	0.006416	0.0396126	0.0277983	LOC115702626/LOC115702633/LOC115702808/LOC115702812/LOC115702846/LOC115705296/LOC115706487/LOC115706814/LOC115706944/LOC115707318/LOC115708731/LOC115708785/LOC115708793/LOC115709724/LOC115712334/LOC115712441/LOC115712930/LOC115712939/LOC115719232/LOC115699214/LOC115699977/LOC115702314/LOC115707087/LOC115705580/LOC115706796/LOC115707051/LOC115704850/LOC115705663/LOC115705659/LOC115705095/LOC115705…	141
363	H3K4me3	GO:0006631	fatty acid metabolic process	195/11786	236/15562	0.00648855	0.0399501	0.0280352	LOC115702591/LOC115702927/LOC115703179/LOC115703195/LOC115703234/LOC115710077/LOC115723066/LOC115703721/LOC115705664/LOC115705684/LOC115707488/LOC115705741/LOC115706299/LOC115709512/LOC115710753/LOC115711315/LOC115712074/LOC115713865/LOC115714045/LOC115699277/LOC115700382/LOC115700844/LOC115701091/LOC115702253/LOC115702318/LOC115705594/LOC115705717/LOC115708301/LOC115708299/LOC115703964/LOC115706…	195
364	H3K4me3	GO:0009756	carbohydrate mediated signaling	18/11786	18/15562	0.00669961	0.0405491	0.0284555	LOC115722899/LOC115703789/LOC115706236/LOC115706813/LOC115704813/LOC115709249/LOC115710188/LOC115710220/LOC115708807/LOC115712724/LOC115717099/LOC115717118/LOC115723273/LOC115722706/LOC115694749/LOC115696866/LOC115697537/LOC115699018	18
365	H3K4me3	GO:0010182	sugar mediated signaling pathway	18/11786	18/15562	0.00669961	0.0405491	0.0284555	LOC115722899/LOC115703789/LOC115706236/LOC115706813/LOC115704813/LOC115709249/LOC115710188/LOC115710220/LOC115708807/LOC115712724/LOC115717099/LOC115717118/LOC115723273/LOC115722706/LOC115694749/LOC115696866/LOC115697537/LOC115699018	18
366	H3K4me3	GO:0051348	negative regulation of transferase activity	18/11786	18/15562	0.00669961	0.0405491	0.0284555	LOC115702697/LOC115703000/LOC115698890/LOC115715318/LOC115705210/LOC115709581/LOC115714672/LOC115714141/LOC115714068/LOC115714739/LOC115718606/LOC115719518/LOC115722602/LOC115723039/LOC115695707/LOC115725269/LOC115699615/LOC115698855	18
367	H3K4me3	GO:0000469	cleavage involved in rRNA processing	25/11786	26/15562	0.00675487	0.0405491	0.0284555	LOC115703071/LOC115706767/LOC115703908/LOC115707989/LOC115711482/LOC115711500/LOC115716650/LOC115717511/LOC115715834/LOC115718149/LOC115716774/LOC115717042/LOC115719110/LOC115721168/LOC115722382/LOC115722268/LOC115695946/LOC115725582/LOC115694746/LOC115696968/LOC115697840/LOC115701141/LOC115699561/LOC115700468/LOC115700470	25
368	H3K4me3	GO:0006558	L-phenylalanine metabolic process	25/11786	26/15562	0.00675487	0.0405491	0.0284555	LOC115706017/LOC115706057/LOC115699125/LOC115706668/LOC115711262/LOC115710187/LOC115710186/LOC115709862/LOC115709282/LOC115709383/LOC115715054/LOC115715078/LOC115712503/LOC115712504/LOC115715119/LOC115719371/LOC115719519/LOC115721090/LOC115698105/LOC115698185/LOC115697430/LOC115698788/LOC115699138/LOC115698862/LOC115701500	25
369	H3K4me3	GO:0042026	protein refolding	25/11786	26/15562	0.00675487	0.0405491	0.0284555	LOC115722410/LOC115703671/LOC115706958/LOC115707866/LOC115707966/LOC115707967/LOC115711561/LOC115713018/LOC115714262/LOC115716668/LOC115716233/LOC115716201/LOC115717050/LOC115721137/LOC115721093/LOC115718945/LOC115720630/LOC115719545/LOC115722244/LOC115723171/LOC115724179/LOC115695984/LOC115695916/LOC115697386/LOC115699335	25
370	H3K4me3	GO:1901259	chloroplast rRNA processing	25/11786	26/15562	0.00675487	0.0405491	0.0284555	LOC115711190/LOC115714532/LOC115698624/LOC115699461/LOC115704693/LOC115704812/LOC115708072/LOC115709937/LOC115709797/LOC115710209/LOC115711408/LOC115714832/LOC115714340/LOC115715723/LOC115717067/LOC115717753/LOC115716569/LOC115716440/LOC115716874/LOC115723113/LOC115694820/LOC115697477/LOC115700450/LOC115699616/LOC115699553	25
371	H3K4me3	GO:1901991	negative regulation of mitotic cell cycle phase transition	25/11786	26/15562	0.00675487	0.0405491	0.0284555	LOC115702671/LOC115703082/LOC115699428/LOC115702316/LOC115705540/LOC115704754/LOC115704365/LOC115707872/LOC115711362/LOC115715115/LOC115711949/LOC115714937/LOC115713293/LOC115712237/LOC115715784/LOC115720767/LOC115720971/LOC115718397/LOC115725709/LOC115725099/LOC115700729/LOC115701502/LOC115701014/LOC115698819/LOC115699664	25
372	H3K4me3	GO:1902221	erythrose 4-phosphate/phosphoenolpyruvate family amino acid metabolic process	25/11786	26/15562	0.00675487	0.0405491	0.0284555	LOC115706017/LOC115706057/LOC115699125/LOC115706668/LOC115711262/LOC115710187/LOC115710186/LOC115709862/LOC115709282/LOC115709383/LOC115715054/LOC115715078/LOC115712503/LOC115712504/LOC115715119/LOC115719371/LOC115719519/LOC115721090/LOC115698105/LOC115698185/LOC115697430/LOC115698788/LOC115699138/LOC115698862/LOC115701500	25
373	H3K4me3	GO:0030148	sphingolipid biosynthetic process	31/11786	33/15562	0.00679567	0.0405491	0.0284555	LOC115702927/LOC115702715/LOC115706555/LOC115709151/LOC115713775/LOC115714045/LOC115700382/LOC115706029/LOC115706612/LOC115705557/LOC115706893/LOC115707058/LOC115705280/LOC115709662/LOC115712929/LOC115714440/LOC115712891/LOC115717316/LOC115718761/LOC115719287/LOC115719383/LOC115722810/LOC115722940/LOC115723288/LOC115724429/LOC115698190/LOC115697518/LOC115697449/LOC115699698/LOC115699743/LOC115699…	31
374	H3K4me3	GO:0046283	anthocyanin-containing compound metabolic process	31/11786	33/15562	0.00679567	0.0405491	0.0284555	LOC115703590/LOC115710554/LOC115711038/LOC115697431/LOC115705537/LOC115707394/LOC115710150/LOC115708688/LOC115712602/LOC115712603/LOC115712807/LOC115713616/LOC115712848/LOC115714085/LOC115714100/LOC115716326/LOC115716673/LOC115716203/LOC115719255/LOC115724965/LOC115724966/LOC115694905/LOC115695175/LOC115695811/LOC115695670/LOC115695871/LOC115698919/LOC115698752/LOC115699438/LOC115698903/LOC115700…	31
375	H3K4me3	GO:0009787	regulation of abscisic acid-activated signaling pathway	61/11786	69/15562	0.00685797	0.0405491	0.0284555	LOC115702773/LOC115716842/LOC115703234/LOC115706017/LOC115706057/LOC115707089/LOC115707344/LOC115709817/LOC115710898/LOC115711038/LOC115711315/LOC115705433/LOC115705123/LOC115706206/LOC115705537/LOC115705449/LOC115705534/LOC115705569/LOC115707592/LOC115706960/LOC115707606/LOC115707520/LOC115704936/LOC115704592/LOC115704595/LOC115705254/LOC115710324/LOC115709621/LOC115712086/LOC115712811/LOC115712…	61
376	H3K4me3	GO:0070646	protein modification by small protein removal	61/11786	69/15562	0.00685797	0.0405491	0.0284555	LOC115722421/LOC115707386/LOC115709351/LOC115717510/LOC115697495/LOC115699828/LOC115700060/LOC115700528/LOC115700579/LOC115705667/LOC115706015/LOC115706274/LOC115706311/LOC115706574/LOC115706687/LOC115707363/LOC115707626/LOC115705288/LOC115708226/LOC115711378/LOC115712544/LOC115715287/LOC115714995/LOC115714210/LOC115714014/LOC115714233/LOC115714060/LOC115714279/LOC115713969/LOC115716888/LOC115716…	61
377	H3K4me3	GO:1901419	regulation of response to alcohol	61/11786	69/15562	0.00685797	0.0405491	0.0284555	LOC115702773/LOC115716842/LOC115703234/LOC115706017/LOC115706057/LOC115707089/LOC115707344/LOC115709817/LOC115710898/LOC115711038/LOC115711315/LOC115705433/LOC115705123/LOC115706206/LOC115705537/LOC115705449/LOC115705534/LOC115705569/LOC115707592/LOC115706960/LOC115707606/LOC115707520/LOC115704936/LOC115704592/LOC115704595/LOC115705254/LOC115710324/LOC115709621/LOC115712086/LOC115712811/LOC115712…	61
378	H3K4me3	GO:1905957	regulation of cellular response to alcohol	61/11786	69/15562	0.00685797	0.0405491	0.0284555	LOC115702773/LOC115716842/LOC115703234/LOC115706017/LOC115706057/LOC115707089/LOC115707344/LOC115709817/LOC115710898/LOC115711038/LOC115711315/LOC115705433/LOC115705123/LOC115706206/LOC115705537/LOC115705449/LOC115705534/LOC115705569/LOC115707592/LOC115706960/LOC115707606/LOC115707520/LOC115704936/LOC115704592/LOC115704595/LOC115705254/LOC115710324/LOC115709621/LOC115712086/LOC115712811/LOC115712…	61
379	H3K4me3	GO:0009266	response to temperature stimulus	305/11786	376/15562	0.00700249	0.0412944	0.0289785	LOC115702626/LOC115702633/LOC115702661/LOC115702676/LOC115702460/LOC115702773/LOC115702777/LOC115716842/LOC115702963/LOC115725581/LOC115716590/LOC115719095/LOC115694702/LOC115697104/LOC115703544/LOC115704885/LOC115704957/LOC115705564/LOC115706453/LOC115706910/LOC115707840/LOC115708742/LOC115708896/LOC115709176/LOC115709512/LOC115709698/LOC115711619/LOC115711881/LOC115712240/LOC115712375/LOC115722…	305
380	H3K4me3	GO:0072330	monocarboxylic acid biosynthetic process	194/11786	235/15562	0.00714359	0.0420156	0.0294846	LOC115702672/LOC115702927/LOC115702934/LOC115723648/LOC115703195/LOC115703234/LOC115722899/LOC115695922/LOC115695831/LOC115704142/LOC115705664/LOC115705684/LOC115707488/LOC115709512/LOC115710665/LOC115710753/LOC115711315/LOC115713988/LOC115714045/LOC115699125/LOC115696400/LOC115700382/LOC115700844/LOC115701091/LOC115702162/LOC115702253/LOC115705594/LOC115705717/LOC115706668/LOC115703964/LOC115706…	194
381	H3K4me3	GO:0016051	carbohydrate biosynthetic process	209/11786	254/15562	0.00719287	0.0421944	0.0296101	LOC115702705/LOC115702712/LOC115702724/LOC115702725/LOC115702818/LOC115702834/LOC115702875/LOC115703117/LOC115702988/LOC115703927/LOC115704043/LOC115705832/LOC115715861/LOC115702835/LOC115704122/LOC115704128/LOC115704241/LOC115704378/LOC115705741/LOC115706017/LOC115708936/LOC115709176/LOC115709358/LOC115709473/LOC115710185/LOC115710763/LOC115711259/LOC115711619/LOC115712065/LOC115713840/LOC115697…	209
382	H3K4me3	GO:0034599	cellular response to oxidative stress	56/11786	63/15562	0.0072928	0.0426686	0.0299429	LOC115702594/LOC115702667/LOC115704704/LOC115706351/LOC115706361/LOC115707840/LOC115710101/LOC115722183/LOC115696683/LOC115708099/LOC115705870/LOC115706158/LOC115706606/LOC115704018/LOC115705569/LOC115708136/LOC115706423/LOC115707994/LOC115710227/LOC115711616/LOC115709468/LOC115711336/LOC115711346/LOC115714256/LOC115712119/LOC115712830/LOC115711955/LOC115714333/LOC115714820/LOC115715697/LOC115716…	56
383	H3K4me3	GO:0000027	ribosomal large subunit assembly	36/11786	39/15562	0.00759833	0.0442247	0.0310349	LOC115710511/LOC115708919/LOC115698624/LOC115705545/LOC115705126/LOC115705011/LOC115706595/LOC115707731/LOC115703901/LOC115704888/LOC115706414/LOC115707032/LOC115708052/LOC115709213/LOC115709214/LOC115709215/LOC115710163/LOC115710241/LOC115710956/LOC115714719/LOC115714850/LOC115717245/LOC115719698/LOC115720771/LOC115718485/LOC115721208/LOC115719339/LOC115719281/LOC115721796/LOC115723008/LOC115725…	36
384	H3K4me3	GO:0006284	base-excision repair	36/11786	39/15562	0.00759833	0.0442247	0.0310349	LOC115709802/LOC115700479/LOC115700865/LOC115696675/LOC115706025/LOC115706114/LOC115707874/LOC115707925/LOC115711530/LOC115709607/LOC115709715/LOC115710284/LOC115710081/LOC115711515/LOC115714566/LOC115712989/LOC115712073/LOC115712618/LOC115714447/LOC115714420/LOC115715026/LOC115719330/LOC115719543/LOC115719566/LOC115720814/LOC115720590/LOC115723156/LOC115725596/LOC115724836/LOC115697724/LOC115697…	36
385	H3K4me3	GO:0044728	DNA methylation or demethylation	46/11786	51/15562	0.00788584	0.0456602	0.0320423	LOC115716590/LOC115725500/LOC115702987/LOC115710463/LOC115711167/LOC115697752/LOC115699010/LOC115699522/LOC115700459/LOC115703950/LOC115705577/LOC115706114/LOC115704892/LOC115705294/LOC115708999/LOC115709402/LOC115713936/LOC115712505/LOC115712625/LOC115713457/LOC115711981/LOC115712154/LOC115713791/LOC115714399/LOC115715026/LOC115712558/LOC115717183/LOC115717005/LOC115719474/LOC115719230/LOC115719…	46
386	H3K4me3	GO:0120254	olefinic compound metabolic process	46/11786	51/15562	0.00788584	0.0456602	0.0320423	LOC115723648/LOC115722899/LOC115699125/LOC115696400/LOC115704205/LOC115706668/LOC115705779/LOC115704849/LOC115706646/LOC115707397/LOC115709275/LOC115711262/LOC115710187/LOC115710186/LOC115710324/LOC115709862/LOC115709282/LOC115709383/LOC115710211/LOC115709153/LOC115715153/LOC115712643/LOC115714940/LOC115712396/LOC115712755/LOC115717044/LOC115722423/LOC115724170/LOC115722286/LOC115723252/LOC115725…	46
387	H3K4me3	GO:0031329	regulation of cellular catabolic process	103/11786	121/15562	0.00796665	0.0460089	0.032287	LOC115702597/LOC115702736/LOC115701559/LOC115702795/LOC115702809/LOC115702924/LOC115703165/LOC115722899/LOC115702566/LOC115703071/LOC115704249/LOC115700278/LOC115708098/LOC115707805/LOC115703789/LOC115706748/LOC115705197/LOC115706055/LOC115705109/LOC115705405/LOC115705079/LOC115703864/LOC115707364/LOC115707916/LOC115709390/LOC115709250/LOC115711684/LOC115711419/LOC115711412/LOC115710156/LOC115711…	103
388	H3K4me3	GO:0006497	protein lipidation	69/11786	79/15562	0.00804852	0.0462428	0.0324511	LOC115702642/LOC115717286/LOC115702566/LOC115702965/LOC115708276/LOC115708202/LOC115698229/LOC115703830/LOC115705836/LOC115705095/LOC115707577/LOC115703955/LOC115707764/LOC115708159/LOC115705608/LOC115705954/LOC115706335/LOC115707216/LOC115707830/LOC115708821/LOC115711507/LOC115709112/LOC115709641/LOC115711671/LOC115708709/LOC115712379/LOC115714585/LOC115714113/LOC115714501/LOC115712936/LOC115712…	69
389	H3K4me3	GO:0042158	lipoprotein biosynthetic process	69/11786	79/15562	0.00804852	0.0462428	0.0324511	LOC115702642/LOC115717286/LOC115702566/LOC115702965/LOC115708276/LOC115708202/LOC115698229/LOC115703830/LOC115705836/LOC115705095/LOC115707577/LOC115703955/LOC115707764/LOC115708159/LOC115705608/LOC115705954/LOC115706335/LOC115707216/LOC115707830/LOC115708821/LOC115711507/LOC115709112/LOC115709641/LOC115711671/LOC115708709/LOC115712379/LOC115714585/LOC115714113/LOC115714501/LOC115712936/LOC115712…	69
390	H3K4me3	GO:0045814	negative regulation of gene expression, epigenetic	60/11786	68/15562	0.0080815	0.0463132	0.0325005	LOC115702592/LOC115724257/LOC115703251/LOC115707433/LOC115716590/LOC115702759/LOC115702778/LOC115706453/LOC115709095/LOC115711694/LOC115697325/LOC115699021/LOC115702261/LOC115705198/LOC115706762/LOC115706763/LOC115705817/LOC115705637/LOC115705577/LOC115706114/LOC115706193/LOC115706711/LOC115709205/LOC115709204/LOC115709206/LOC115709207/LOC115709629/LOC115709770/LOC115709746/LOC115708999/LOC115709…	60
391	H3K4me3	GO:0031347	regulation of defense response	123/11786	146/15562	0.00818156	0.0467667	0.0328188	LOC115702671/LOC115722899/LOC115703620/LOC115705210/LOC115707089/LOC115707998/LOC115711709/LOC115697056/LOC115699142/LOC115699277/LOC115699852/LOC115700255/LOC115705628/LOC115707283/LOC115706817/LOC115705547/LOC115705155/LOC115706226/LOC115705512/LOC115705838/LOC115705645/LOC115705952/LOC115705951/LOC115706624/LOC115706960/LOC115704555/LOC115708302/LOC115704936/LOC115704592/LOC115704595/LOC115705…	123
392	H3K4me3	GO:0006368	transcription elongation by RNA polymerase II promoter	30/11786	32/15562	0.00848522	0.0478901	0.0336071	LOC115710634/LOC115699648/LOC115706756/LOC115708273/LOC115708306/LOC115705998/LOC115706379/LOC115707352/LOC115707373/LOC115707534/LOC115709356/LOC115714995/LOC115714210/LOC115712778/LOC115714900/LOC115713009/LOC115718958/LOC115718408/LOC115721359/LOC115718626/LOC115718725/LOC115722570/LOC115721763/LOC115723135/LOC115724650/LOC115697733/LOC115698749/LOC115700343/LOC115701135/LOC115699581	30
393	H3K4me3	GO:0007062	sister chromatid cohesion	30/11786	32/15562	0.00848522	0.0478901	0.0336071	LOC115720388/LOC115713311/LOC115706157/LOC115706037/LOC115706800/LOC115704754/LOC115704365/LOC115706010/LOC115707265/LOC115709787/LOC115709598/LOC115714357/LOC115714502/LOC115715634/LOC115717172/LOC115721311/LOC115720888/LOC115718530/LOC115719739/LOC115721250/LOC115719294/LOC115724097/LOC115724929/LOC115725099/LOC115696864/LOC115698819/LOC115698551/LOC115699753/LOC115698600/LOC115702015	30
394	H3K4me3	GO:0042278	purine nucleoside metabolic process	30/11786	32/15562	0.00848522	0.0478901	0.0336071	LOC115703114/LOC115703131/LOC115703913/LOC115710101/LOC115712548/LOC115713640/LOC115698624/LOC115705163/LOC115705417/LOC115707116/LOC115707270/LOC115704624/LOC115708071/LOC115710333/LOC115709769/LOC115709677/LOC115712679/LOC115712416/LOC115716364/LOC115716800/LOC115716958/LOC115716183/LOC115720686/LOC115722730/LOC115722830/LOC115721913/LOC115721871/LOC115725611/LOC115699586/LOC115702122	30
395	H3K4me3	GO:0043628	small regulatory ncRNA 3'-end processing	30/11786	32/15562	0.00848522	0.0478901	0.0336071	LOC115703071/LOC115707493/LOC115705454/LOC115706052/LOC115705625/LOC115708113/LOC115707497/LOC115708743/LOC115709960/LOC115710246/LOC115713019/LOC115717511/LOC115715834/LOC115718149/LOC115717042/LOC115719110/LOC115721164/LOC115722942/LOC115722292/LOC115722268/LOC115695946/LOC115695818/LOC115694746/LOC115724959/LOC115696968/LOC115701477/LOC115701141/LOC115699675/LOC115699561/LOC115700643	30
396	H3K4me3	GO:0051261	protein depolymerization	30/11786	32/15562	0.00848522	0.0478901	0.0336071	LOC115702674/LOC115702784/LOC115702799/LOC115704651/LOC115712375/LOC115712383/LOC115724500/LOC115699818/LOC115704024/LOC115706539/LOC115709883/LOC115711537/LOC115709962/LOC115710014/LOC115714084/LOC115714393/LOC115713918/LOC115714208/LOC115717561/LOC115716654/LOC115716124/LOC115721178/LOC115720413/LOC115718638/LOC115722260/LOC115722265/LOC115723458/LOC115722267/LOC115697424/LOC115697882	30
397	H3K4me3	GO:0006338	chromatin remodeling	90/11786	105/15562	0.00858834	0.04835	0.0339298	LOC115703105/LOC115703107/LOC115703141/LOC115707931/LOC115703693/LOC115706462/LOC115706637/LOC115706762/LOC115706763/LOC115708259/LOC115705161/LOC115707578/LOC115705817/LOC115705214/LOC115705230/LOC115705637/LOC115706471/LOC115708283/LOC115703595/LOC115707276/LOC115707295/LOC115711678/LOC115709260/LOC115708673/LOC115709629/LOC115709826/LOC115710064/LOC115709710/LOC115715115/LOC115714491/LOC115714…	90
398	H3K4me3	GO:1901292	nucleoside phosphate catabolic process	17/11786	17/15562	0.00884913	0.049693	0.0348723	LOC115703193/LOC115705497/LOC115707697/LOC115712545/LOC115715167/LOC115712043/LOC115716323/LOC115724129/LOC115724184/LOC115724574/LOC115724953/LOC115697653/LOC115697494/LOC115698119/LOC115701385/LOC115698545/LOC115701337	17
399	H3K56ac	GO:0006886	intracellular protein transport	384/8108	499/15562	2.54e-31	5.66e-28	4.22e-28	LOC115702642/LOC115702675/LOC115702739/LOC115702808/LOC115702816/LOC115702879/LOC115702892/LOC115702893/LOC115702923/LOC115703009/LOC115703086/LOC115703087/LOC115704956/LOC115710575/LOC115713633/LOC115713739/LOC115723066/LOC115699346/LOC115700804/LOC115702343/LOC115702605/LOC115703223/LOC115705296/LOC115705833/LOC115706299/LOC115707682/LOC115708514/LOC115708202/LOC115708838/LOC115710763/LOC115711…	384
400	H3K56ac	GO:0022613	ribonucleoprotein complex biogenesis	356/8108	479/15562	3.57e-24	3.01e-21	2.25e-21	LOC115702599/LOC115702649/LOC115702861/LOC115702948/LOC115702975/LOC115703055/LOC115703081/LOC115722899/LOC115720436/LOC115697311/LOC115697394/LOC115699881/LOC115702657/LOC115703071/LOC115703796/LOC115705361/LOC115705729/LOC115707610/LOC115708919/LOC115711190/LOC115712334/LOC115713831/LOC115714532/LOC115722758/LOC115697453/LOC115697809/LOC115695309/LOC115698158/LOC115698624/LOC115699461/LOC115699…	356
401	H3K56ac	GO:0016071	mRNA metabolic process	347/8108	465/15562	4.05e-24	3.01e-21	2.25e-21	LOC115702597/LOC115702599/LOC115702617/LOC115704488/LOC115702736/LOC115702901/LOC115702907/LOC115703169/LOC115703195/LOC115703235/LOC115703251/LOC115715318/LOC115696485/LOC115696283/LOC115696009/LOC115702657/LOC115703071/LOC115703104/LOC115703190/LOC115703796/LOC115704249/LOC115705321/LOC115706269/LOC115707629/LOC115707638/LOC115707661/LOC115708219/LOC115709368/LOC115709604/LOC115710828/LOC115711…	347
402	H3K56ac	GO:0006397	mRNA processing	264/8108	339/15562	3.28e-23	1.83e-20	1.37e-20	LOC115702597/LOC115702599/LOC115702617/LOC115704488/LOC115702901/LOC115702907/LOC115703169/LOC115703235/LOC115703251/LOC115715318/LOC115696485/LOC115696283/LOC115696009/LOC115702657/LOC115703190/LOC115703796/LOC115705321/LOC115706269/LOC115707629/LOC115707638/LOC115707661/LOC115708219/LOC115709368/LOC115709604/LOC115711676/LOC115712297/LOC115712402/LOC115712646/LOC115713091/LOC115713831/LOC115713…	264
403	H3K56ac	GO:0016192	vesicle-mediated transport	333/8108	448/15562	1.08e-22	4.79e-20	3.58e-20	LOC115702608/LOC115702618/LOC115702674/LOC115702675/LOC115702727/LOC115702737/LOC115702739/LOC115702753/LOC115702754/LOC115702816/LOC115702864/LOC115705037/LOC115703086/LOC115703087/LOC115703124/LOC115703160/LOC115704956/LOC115705660/LOC115710575/LOC115713633/LOC115714437/LOC115702605/LOC115705575/LOC115705833/LOC115708838/LOC115709655/LOC115710763/LOC115711980/LOC115713143/LOC115713350/LOC115713…	333
404	H3K56ac	GO:0019941	modification-dependent protein catabolic process	263/8108	343/15562	2.19e-21	7.83e-19	5.85e-19	LOC115702658/LOC115702663/LOC115702752/LOC115702908/LOC115702951/LOC115703038/LOC115703056/LOC115703086/LOC115703087/LOC115703159/LOC115703165/LOC115720495/LOC115721901/LOC115723387/LOC115700096/LOC115702664/LOC115702843/LOC115703721/LOC115703805/LOC115706219/LOC115707344/LOC115707386/LOC115709753/LOC115709802/LOC115710949/LOC115711205/LOC115714059/LOC115717510/LOC115720532/LOC115721654/LOC115723…	263
405	H3K56ac	GO:0043632	modification-dependent macromolecule catabolic process	270/8108	354/15562	2.46e-21	7.83e-19	5.85e-19	LOC115702658/LOC115702663/LOC115702752/LOC115702908/LOC115702951/LOC115703038/LOC115703056/LOC115703086/LOC115703087/LOC115703159/LOC115703165/LOC115720495/LOC115721901/LOC115723387/LOC115700096/LOC115702664/LOC115702843/LOC115703071/LOC115703721/LOC115703805/LOC115706219/LOC115707344/LOC115707386/LOC115709753/LOC115709802/LOC115710949/LOC115711205/LOC115714059/LOC115717510/LOC115720532/LOC115721…	270
406	H3K56ac	GO:0033365	protein localization to organelle	212/8108	266/15562	4.09e-21	1.14e-18	8.5e-19	LOC115702727/LOC115702737/LOC115702753/LOC115702754/LOC115702808/LOC115702879/LOC115702892/LOC115702893/LOC115702923/LOC115703009/LOC115703086/LOC115703087/LOC115723066/LOC115699346/LOC115700804/LOC115702343/LOC115703223/LOC115704352/LOC115704344/LOC115705296/LOC115706299/LOC115707682/LOC115708514/LOC115702407/LOC115711387/LOC115712334/LOC115713121/LOC115697285/LOC115698324/LOC115700972/LOC115702…	212
407	H3K56ac	GO:0072594	establishment of protein localization to organelle	183/8108	224/15562	1.22e-20	3.03e-18	2.26e-18	LOC115702808/LOC115702879/LOC115702892/LOC115702893/LOC115702923/LOC115703009/LOC115703086/LOC115703087/LOC115723066/LOC115699346/LOC115700804/LOC115702343/LOC115703223/LOC115705296/LOC115706299/LOC115707682/LOC115708514/LOC115711387/LOC115712334/LOC115713121/LOC115697285/LOC115702317/LOC115705543/LOC115708339/LOC115708225/LOC115706482/LOC115705580/LOC115705549/LOC115708161/LOC115706468/LOC115705…	183
408	H3K56ac	GO:0006511	ubiquitin-dependent protein catabolic process	254/8108	332/15562	1.83e-20	4.08e-18	3.05e-18	LOC115702658/LOC115702663/LOC115702752/LOC115702908/LOC115702951/LOC115703038/LOC115703056/LOC115703086/LOC115703087/LOC115703159/LOC115703165/LOC115720495/LOC115721901/LOC115723387/LOC115700096/LOC115702664/LOC115702843/LOC115703721/LOC115703805/LOC115706219/LOC115707344/LOC115707386/LOC115709753/LOC115709802/LOC115710949/LOC115711205/LOC115714059/LOC115717510/LOC115720532/LOC115721654/LOC115723…	254
409	H3K56ac	GO:0032446	protein modification by small protein conjugation	320/8108	439/15562	1.34e-19	2.72e-17	2.03e-17	LOC115702698/LOC115702909/LOC115702941/LOC115702946/LOC115703038/LOC115703056/LOC115703086/LOC115703087/LOC115703165/LOC115705299/LOC115715318/LOC115721901/LOC115723387/LOC115695922/LOC115695661/LOC115695831/LOC115695269/LOC115695743/LOC115702657/LOC115703223/LOC115704772/LOC115706269/LOC115706299/LOC115707344/LOC115708809/LOC115709706/LOC115709811/LOC115710175/LOC115710699/LOC115710898/LOC115710…	320
410	H3K56ac	GO:0008380	RNA splicing	217/8108	279/15562	3.51e-19	6.52e-17	4.87e-17	LOC115702597/LOC115702599/LOC115703169/LOC115703195/LOC115703235/LOC115709856/LOC115703251/LOC115715318/LOC115696485/LOC115696283/LOC115696009/LOC115699266/LOC115702657/LOC115703061/LOC115703796/LOC115705321/LOC115707629/LOC115708219/LOC115709368/LOC115709604/LOC115710094/LOC115710639/LOC115711676/LOC115712402/LOC115713091/LOC115713831/LOC115714080/LOC115696486/LOC115698037/LOC115698158/LOC115699…	217
411	H3K56ac	GO:0030163	protein catabolic process	313/8108	432/15562	1.52e-18	2.45e-16	1.83e-16	LOC115702658/LOC115702663/LOC115702752/LOC115702908/LOC115702951/LOC115702981/LOC115703038/LOC115703056/LOC115703086/LOC115703087/LOC115703144/LOC115703159/LOC115703165/LOC115707753/LOC115720495/LOC115721223/LOC115721901/LOC115723387/LOC115700096/LOC115702664/LOC115702843/LOC115703721/LOC115703805/LOC115706219/LOC115707344/LOC115707386/LOC115709753/LOC115709802/LOC115710949/LOC115711205/LOC115711…	313
412	H3K56ac	GO:0016567	protein ubiquitination	303/8108	416/15562	1.54e-18	2.45e-16	1.83e-16	LOC115702698/LOC115702909/LOC115702941/LOC115702946/LOC115703038/LOC115703056/LOC115703086/LOC115703087/LOC115703165/LOC115705299/LOC115715318/LOC115721901/LOC115723387/LOC115695922/LOC115695661/LOC115695831/LOC115695269/LOC115695743/LOC115702657/LOC115703223/LOC115704772/LOC115706269/LOC115706299/LOC115707344/LOC115708809/LOC115709706/LOC115709811/LOC115710175/LOC115710699/LOC115710898/LOC115710…	303
413	H3K56ac	GO:0034470	ncRNA processing	325/8108	452/15562	2.23e-18	3.32e-16	2.48e-16	LOC115702649/LOC115702719/LOC115702861/LOC115702948/LOC115702975/LOC115703055/LOC115703081/LOC115703235/LOC115722899/LOC115720436/LOC115699881/LOC115701640/LOC115703071/LOC115703284/LOC115703913/LOC115704391/LOC115705361/LOC115707493/LOC115710828/LOC115711190/LOC115712383/LOC115714532/LOC115722758/LOC115697453/LOC115695309/LOC115698624/LOC115699461/LOC115699576/LOC115705454/LOC115705135/LOC115706…	325
414	H3K56ac	GO:0042254	ribosome biogenesis	285/8108	390/15562	7.73e-18	1.08e-15	8.04e-16	LOC115702649/LOC115702861/LOC115702948/LOC115702975/LOC115703055/LOC115703081/LOC115722899/LOC115720436/LOC115697311/LOC115697394/LOC115699881/LOC115703071/LOC115705361/LOC115705729/LOC115708919/LOC115711190/LOC115712334/LOC115714532/LOC115722758/LOC115697453/LOC115695309/LOC115698624/LOC115699461/LOC115699576/LOC115700054/LOC115705545/LOC115705135/LOC115708213/LOC115704898/LOC115706782/LOC115705…	285
415	H3K56ac	GO:0048193	Golgi vesicle transport	127/8108	149/15562	1.02e-17	1.34e-15	1e-15	LOC115702618/LOC115702727/LOC115702737/LOC115702753/LOC115702754/LOC115705037/LOC115703086/LOC115703087/LOC115703124/LOC115703160/LOC115704956/LOC115705660/LOC115713633/LOC115702605/LOC115710763/LOC115713350/LOC115715804/LOC115697109/LOC115699031/LOC115700291/LOC115700972/LOC115706048/LOC115705393/LOC115707648/LOC115704658/LOC115708180/LOC115706760/LOC115706419/LOC115705459/LOC115705466/LOC115706…	127
416	H3K56ac	GO:0006325	chromatin organization	293/8108	404/15562	1.55e-17	1.92e-15	1.43e-15	LOC115702592/LOC115704488/LOC115702752/LOC115702766/LOC115702813/LOC115702872/LOC115703044/LOC115703046/LOC115703121/LOC115703251/LOC115707433/LOC115707931/LOC115702759/LOC115702778/LOC115704038/LOC115704391/LOC115704855/LOC115706453/LOC115707169/LOC115708212/LOC115709095/LOC115709107/LOC115711086/LOC115711694/LOC115713717/LOC115713758/LOC115714021/LOC115719082/LOC115724500/LOC115697325/LOC115697…	293
417	H3K56ac	GO:0051603	proteolysis involved in protein catabolic process	293/8108	406/15562	4.79e-17	5.62e-15	4.19e-15	LOC115702658/LOC115702663/LOC115702752/LOC115702908/LOC115702951/LOC115702981/LOC115703038/LOC115703056/LOC115703086/LOC115703087/LOC115703144/LOC115703159/LOC115703165/LOC115707753/LOC115720495/LOC115721901/LOC115723387/LOC115700096/LOC115702664/LOC115702843/LOC115703721/LOC115703805/LOC115706219/LOC115707344/LOC115707386/LOC115709753/LOC115709802/LOC115710949/LOC115711205/LOC115711229/LOC115714…	293
418	H3K56ac	GO:0006605	protein targeting	172/8108	220/15562	7.18e-16	8.01e-14	5.98e-14	LOC115702642/LOC115702808/LOC115702879/LOC115702892/LOC115702923/LOC115703009/LOC115703086/LOC115703087/LOC115713739/LOC115723066/LOC115699346/LOC115700804/LOC115702343/LOC115703223/LOC115706299/LOC115707682/LOC115708514/LOC115708202/LOC115711387/LOC115713121/LOC115715804/LOC115697285/LOC115702317/LOC115705543/LOC115705836/LOC115708339/LOC115708225/LOC115706482/LOC115708161/LOC115706468/LOC115707…	172
419	H3K56ac	GO:0016570	histone modification	162/8108	207/15562	4.24e-15	4.5e-13	3.36e-13	LOC115704488/LOC115702752/LOC115702766/LOC115702813/LOC115702872/LOC115703044/LOC115703046/LOC115703121/LOC115707433/LOC115704855/LOC115706453/LOC115707169/LOC115708212/LOC115709107/LOC115711086/LOC115713717/LOC115713758/LOC115714021/LOC115719082/LOC115724500/LOC115697752/LOC115698748/LOC115698826/LOC115699021/LOC115705510/LOC115705433/LOC115707975/LOC115706726/LOC115708259/LOC115705830/LOC115707…	162
420	H3K56ac	GO:0090407	organophosphate biosynthetic process	267/8108	376/15562	3.04e-14	3.08e-12	2.3e-12	LOC115702611/LOC115702850/LOC115708996/LOC115703150/LOC115703157/LOC115709998/LOC115722977/LOC115724952/LOC115696485/LOC115698051/LOC115702965/LOC115702987/LOC115704378/LOC115704957/LOC115705104/LOC115705607/LOC115708064/LOC115708073/LOC115708276/LOC115709308/LOC115709620/LOC115709638/LOC115709698/LOC115710101/LOC115710352/LOC115710480/LOC115710877/LOC115710919/LOC115710976/LOC115711722/LOC115712…	267
421	H3K56ac	GO:0000375	RNA splicing, via transesterification reactions	167/8108	220/15562	2.22e-13	2.06e-11	1.54e-11	LOC115702599/LOC115703169/LOC115703235/LOC115703251/LOC115715318/LOC115696485/LOC115696283/LOC115696009/LOC115702657/LOC115703796/LOC115707629/LOC115709368/LOC115709604/LOC115711676/LOC115712402/LOC115713091/LOC115713831/LOC115714080/LOC115696486/LOC115698158/LOC115705445/LOC115705446/LOC115705432/LOC115706049/LOC115704987/LOC115706268/LOC115707264/LOC115707685/LOC115707308/LOC115706287/LOC115705…	167
422	H3K56ac	GO:0000377	RNA splicing, via transesterification reactions with bulged adenosine as nucleophile	167/8108	220/15562	2.22e-13	2.06e-11	1.54e-11	LOC115702599/LOC115703169/LOC115703235/LOC115703251/LOC115715318/LOC115696485/LOC115696283/LOC115696009/LOC115702657/LOC115703796/LOC115707629/LOC115709368/LOC115709604/LOC115711676/LOC115712402/LOC115713091/LOC115713831/LOC115714080/LOC115696486/LOC115698158/LOC115705445/LOC115705446/LOC115705432/LOC115706049/LOC115704987/LOC115706268/LOC115707264/LOC115707685/LOC115707308/LOC115706287/LOC115705…	167
423	H3K56ac	GO:0000398	mRNA splicing, via spliceosome	154/8108	200/15562	2.41e-13	2.15e-11	1.61e-11	LOC115702599/LOC115703169/LOC115703235/LOC115703251/LOC115715318/LOC115696485/LOC115696283/LOC115696009/LOC115702657/LOC115703796/LOC115707629/LOC115709368/LOC115709604/LOC115711676/LOC115712402/LOC115713091/LOC115713831/LOC115714080/LOC115696486/LOC115698158/LOC115705445/LOC115705446/LOC115705432/LOC115706049/LOC115704987/LOC115706268/LOC115707264/LOC115707685/LOC115707308/LOC115706287/LOC115706…	154
424	H3K56ac	GO:0055086	nucleobase-containing small molecule metabolic process	267/8108	382/15562	5.97e-13	5.12e-11	3.82e-11	LOC115702783/LOC115702836/LOC115702850/LOC115702934/LOC115703157/LOC115703193/LOC115709998/LOC115722977/LOC115724952/LOC115699192/LOC115702987/LOC115703913/LOC115704327/LOC115704378/LOC115704957/LOC115705607/LOC115707610/LOC115708064/LOC115708073/LOC115709638/LOC115709698/LOC115710101/LOC115710480/LOC115710877/LOC115710919/LOC115711259/LOC115711637/LOC115711722/LOC115712548/LOC115713640/LOC115723…	267
425	H3K56ac	GO:1901137	carbohydrate derivative biosynthetic process	277/8108	400/15562	1.23e-12	1.02e-10	7.59e-11	LOC115702850/LOC115702863/LOC115702925/LOC115702932/LOC115724952/LOC115695222/LOC115699192/LOC115702965/LOC115704378/LOC115704957/LOC115705607/LOC115707000/LOC115707728/LOC115708064/LOC115708073/LOC115708276/LOC115709068/LOC115709580/LOC115709698/LOC115710101/LOC115710480/LOC115710680/LOC115710877/LOC115710905/LOC115710919/LOC115711627/LOC115712548/LOC115713640/LOC115698229/LOC115698624/LOC115698…	277
426	H3K56ac	GO:0017038	protein import	93/8108	112/15562	6.01e-12	4.78e-10	3.57e-10	LOC115702879/LOC115702892/LOC115702893/LOC115702923/LOC115703009/LOC115713739/LOC115723066/LOC115700804/LOC115703223/LOC115705296/LOC115706299/LOC115708514/LOC115712334/LOC115713121/LOC115705543/LOC115705580/LOC115705549/LOC115708161/LOC115705463/LOC115705865/LOC115705641/LOC115706275/LOC115706827/LOC115707514/LOC115707125/LOC115707486/LOC115707508/LOC115709349/LOC115711532/LOC115708937/LOC115711…	93
427	H3K56ac	GO:0006364	rRNA processing	196/8108	274/15562	2.83e-11	2.17e-09	1.62e-09	LOC115702649/LOC115702861/LOC115702948/LOC115702975/LOC115703055/LOC115703081/LOC115722899/LOC115720436/LOC115699881/LOC115703071/LOC115705361/LOC115711190/LOC115714532/LOC115722758/LOC115697453/LOC115695309/LOC115698624/LOC115699461/LOC115699576/LOC115705135/LOC115704898/LOC115706782/LOC115708179/LOC115706751/LOC115706295/LOC115706595/LOC115708109/LOC115705185/LOC115705490/LOC115704693/LOC115704…	196
428	H3K56ac	GO:0071806	protein transmembrane transport	76/8108	89/15562	3.24e-11	2.33e-09	1.74e-09	LOC115702879/LOC115702892/LOC115703009/LOC115713739/LOC115723066/LOC115699346/LOC115700804/LOC115702343/LOC115703223/LOC115706299/LOC115708514/LOC115711387/LOC115713121/LOC115705543/LOC115708161/LOC115706827/LOC115707514/LOC115707486/LOC115707508/LOC115707868/LOC115709349/LOC115711532/LOC115711629/LOC115708937/LOC115711406/LOC115709760/LOC115711267/LOC115710058/LOC115712478/LOC115712907/LOC115712…	76
429	H3K56ac	GO:0018205	peptidyl-lysine modification	145/8108	193/15562	3.25e-11	2.33e-09	1.74e-09	LOC115704488/LOC115702752/LOC115702766/LOC115702773/LOC115702813/LOC115702872/LOC115703046/LOC115703121/LOC115707433/LOC115704855/LOC115706453/LOC115708212/LOC115709107/LOC115711086/LOC115713717/LOC115713758/LOC115714021/LOC115714628/LOC115719082/LOC115724500/LOC115697752/LOC115698748/LOC115698826/LOC115699021/LOC115705510/LOC115708140/LOC115707975/LOC115706726/LOC115705830/LOC115707487/LOC115705…	145
430	H3K56ac	GO:0016072	rRNA metabolic process	205/8108	289/15562	3.51e-11	2.44e-09	1.82e-09	LOC115702649/LOC115702795/LOC115702861/LOC115702948/LOC115702975/LOC115703055/LOC115703081/LOC115722899/LOC115720436/LOC115699881/LOC115703061/LOC115703071/LOC115705361/LOC115711190/LOC115714532/LOC115722758/LOC115697453/LOC115695309/LOC115698624/LOC115699461/LOC115699576/LOC115705135/LOC115704898/LOC115706782/LOC115708179/LOC115706751/LOC115706295/LOC115706595/LOC115708109/LOC115705185/LOC115705…	205
431	H3K56ac	GO:0010498	proteasomal protein catabolic process	158/8108	214/15562	4.54e-11	3.07e-09	2.29e-09	LOC115702658/LOC115702663/LOC115702752/LOC115702951/LOC115703159/LOC115703165/LOC115720495/LOC115721901/LOC115700096/LOC115702843/LOC115703805/LOC115706219/LOC115709753/LOC115709802/LOC115711205/LOC115714059/LOC115720532/LOC115721654/LOC115723577/LOC115725385/LOC115697677/LOC115699147/LOC115700255/LOC115700278/LOC115700360/LOC115701025/LOC115701199/LOC115702317/LOC115704034/LOC115708308/LOC115705…	158
432	H3K56ac	GO:0006753	nucleoside phosphate metabolic process	213/8108	303/15562	5.69e-11	3.73e-09	2.78e-09	LOC115702783/LOC115702836/LOC115702850/LOC115702934/LOC115703157/LOC115703193/LOC115709998/LOC115722977/LOC115724952/LOC115702987/LOC115704378/LOC115704957/LOC115705607/LOC115707610/LOC115708064/LOC115708073/LOC115709638/LOC115709698/LOC115710101/LOC115710480/LOC115710877/LOC115710919/LOC115711259/LOC115711637/LOC115711722/LOC115712548/LOC115713640/LOC115723768/LOC115699417/LOC115701945/LOC115702…	213
433	H3K56ac	GO:0006414	translational elongation	123/8108	160/15562	7.47e-11	4.75e-09	3.55e-09	LOC115702664/LOC115703190/LOC115705306/LOC115705607/LOC115710185/LOC115710634/LOC115697211/LOC115697677/LOC115698371/LOC115698486/LOC115699059/LOC115699747/LOC115705131/LOC115705624/LOC115706493/LOC115705593/LOC115705834/LOC115706739/LOC115705426/LOC115706128/LOC115705206/LOC115705202/LOC115705054/LOC115704972/LOC115704770/LOC115705115/LOC115705183/LOC115705966/LOC115705998/LOC115706326/LOC115706…	123
434	H3K56ac	GO:0006888	endoplasmic reticulum to Golgi vesicle-mediated transport	67/8108	77/15562	8.06e-11	4.99e-09	3.72e-09	LOC115705037/LOC115704956/LOC115713633/LOC115702605/LOC115713350/LOC115697109/LOC115699031/LOC115705393/LOC115708180/LOC115706760/LOC115708096/LOC115707687/LOC115707553/LOC115703577/LOC115707025/LOC115707137/LOC115707232/LOC115707542/LOC115707730/LOC115705248/LOC115707910/LOC115711242/LOC115709920/LOC115709043/LOC115715291/LOC115714191/LOC115714571/LOC115715012/LOC115714825/LOC115715922/LOC115717…	67
435	H3K56ac	GO:0007005	mitochondrion organization	128/8108	168/15562	9.05e-11	5.45e-09	4.07e-09	LOC115702840/LOC115702879/LOC115702892/LOC115702917/LOC115702923/LOC115698387/LOC115699346/LOC115703596/LOC115707193/LOC115707638/LOC115707661/LOC115708556/LOC115708514/LOC115710860/LOC115713121/LOC115705994/LOC115705543/LOC115706608/LOC115707427/LOC115706681/LOC115708161/LOC115705865/LOC115704985/LOC115706283/LOC115706957/LOC115706722/LOC115706827/LOC115707514/LOC115708333/LOC115707559/LOC115707…	128
436	H3K56ac	GO:0006643	membrane lipid metabolic process	91/8108	112/15562	1.09e-10	6.4e-09	4.78e-09	LOC115702927/LOC115702965/LOC115706555/LOC115707000/LOC115707728/LOC115708276/LOC115709151/LOC115712025/LOC115713775/LOC115698229/LOC115700382/LOC115706113/LOC115706556/LOC115706029/LOC115705095/LOC115705232/LOC115704904/LOC115706612/LOC115705557/LOC115705539/LOC115705608/LOC115708206/LOC115706653/LOC115706893/LOC115707058/LOC115707138/LOC115707216/LOC115707765/LOC115708821/LOC115709734/LOC115709…	91
437	H3K56ac	GO:0006399	tRNA metabolic process	158/8108	216/15562	1.52e-10	8.66e-09	6.47e-09	LOC115702719/LOC115702839/LOC115702840/LOC115703081/LOC115703235/LOC115721396/LOC115712436/LOC115701640/LOC115703071/LOC115703284/LOC115703913/LOC115710161/LOC115710828/LOC115710972/LOC115712383/LOC115700204/LOC115706903/LOC115705236/LOC115708179/LOC115705537/LOC115706732/LOC115707642/LOC115707768/LOC115704878/LOC115704040/LOC115705201/LOC115706208/LOC115707541/LOC115705499/LOC115707146/LOC115706…	158
438	H3K56ac	GO:0043543	protein acylation	100/8108	126/15562	1.76e-10	9.82e-09	7.33e-09	LOC115704488/LOC115702642/LOC115702752/LOC115702766/LOC115702813/LOC115702872/LOC115703046/LOC115717286/LOC115703744/LOC115704855/LOC115708202/LOC115711086/LOC115713717/LOC115713758/LOC115724500/LOC115698748/LOC115705836/LOC115705510/LOC115706726/LOC115705830/LOC115705986/LOC115707577/LOC115703955/LOC115706936/LOC115707764/LOC115706809/LOC115708159/LOC115705931/LOC115705954/LOC115706141/LOC115706…	100
439	H3K56ac	GO:0009117	nucleotide metabolic process	207/8108	296/15562	2.23e-10	1.21e-08	9.04e-09	LOC115702783/LOC115702836/LOC115702850/LOC115702934/LOC115703157/LOC115703193/LOC115709998/LOC115722977/LOC115724952/LOC115704378/LOC115704957/LOC115705607/LOC115707610/LOC115708064/LOC115708073/LOC115709638/LOC115709698/LOC115710101/LOC115710480/LOC115710877/LOC115710919/LOC115711259/LOC115711637/LOC115711722/LOC115712548/LOC115713640/LOC115723768/LOC115699417/LOC115701945/LOC115702002/LOC115702…	207
440	H3K56ac	GO:0043161	proteasome-mediated ubiquitin-dependent protein catabolic process	146/8108	198/15562	2.88e-10	1.53e-08	1.14e-08	LOC115702658/LOC115702663/LOC115702752/LOC115702951/LOC115703159/LOC115703165/LOC115720495/LOC115721901/LOC115700096/LOC115702843/LOC115703805/LOC115706219/LOC115709753/LOC115709802/LOC115711205/LOC115714059/LOC115720532/LOC115721654/LOC115723577/LOC115725385/LOC115697677/LOC115699147/LOC115700255/LOC115700278/LOC115701025/LOC115701199/LOC115702317/LOC115704034/LOC115708308/LOC115705903/LOC115706…	146
441	H3K56ac	GO:0071826	ribonucleoprotein complex subunit organization	129/8108	172/15562	4.79e-10	2.49e-08	1.86e-08	LOC115702599/LOC115702657/LOC115703796/LOC115707610/LOC115708919/LOC115713831/LOC115697809/LOC115698158/LOC115698624/LOC115705545/LOC115708213/LOC115706049/LOC115704987/LOC115705126/LOC115706118/LOC115705011/LOC115705197/LOC115706595/LOC115703901/LOC115707422/LOC115707381/LOC115708260/LOC115705407/LOC115707065/LOC115706194/LOC115706337/LOC115706414/LOC115706521/LOC115707151/LOC115707363/LOC115705…	129
442	H3K56ac	GO:0022618	ribonucleoprotein complex assembly	128/8108	171/15562	6.96e-10	3.53e-08	2.63e-08	LOC115702599/LOC115702657/LOC115703796/LOC115707610/LOC115708919/LOC115713831/LOC115697809/LOC115698158/LOC115698624/LOC115705545/LOC115708213/LOC115706049/LOC115704987/LOC115705126/LOC115706118/LOC115705011/LOC115705197/LOC115706595/LOC115703901/LOC115707422/LOC115707381/LOC115708260/LOC115705407/LOC115707065/LOC115706194/LOC115706337/LOC115706414/LOC115706521/LOC115707151/LOC115707363/LOC115705…	128
443	H3K56ac	GO:0061024	membrane organization	155/8108	215/15562	1.33e-09	6.56e-08	4.9e-08	LOC115702923/LOC115704956/LOC115713415/LOC115713633/LOC115714437/LOC115716371/LOC115699346/LOC115702343/LOC115703620/LOC115704030/LOC115708838/LOC115713350/LOC115714343/LOC115720112/LOC115697431/LOC115698271/LOC115699031/LOC115699901/LOC115702350/LOC115708108/LOC115705189/LOC115708180/LOC115705441/LOC115705207/LOC115703578/LOC115707485/LOC115704904/LOC115705865/LOC115705862/LOC115706098/LOC115705…	155
444	H3K56ac	GO:1901293	nucleoside phosphate biosynthetic process	132/8108	179/15562	2.03e-09	9.82e-08	7.33e-08	LOC115702850/LOC115703157/LOC115709998/LOC115722977/LOC115724952/LOC115702987/LOC115704957/LOC115705607/LOC115708064/LOC115708073/LOC115709638/LOC115709698/LOC115710101/LOC115710480/LOC115710877/LOC115710919/LOC115712548/LOC115713640/LOC115699417/LOC115702325/LOC115702361/LOC115705472/LOC115705471/LOC115706092/LOC115704226/LOC115707664/LOC115705417/LOC115705524/LOC115708323/LOC115705183/LOC115708…	132
445	H3K56ac	GO:0051668	localization within membrane	119/8108	159/15562	2.8e-09	1.33e-07	9.9e-08	LOC115702642/LOC115702923/LOC115703124/LOC115703160/LOC115705660/LOC115713633/LOC115699346/LOC115700804/LOC115702343/LOC115708202/LOC115709308/LOC115711387/LOC115713350/LOC115699557/LOC115700291/LOC115702317/LOC115705836/LOC115708339/LOC115708225/LOC115705207/LOC115706468/LOC115707764/LOC115704770/LOC115705865/LOC115708159/LOC115705954/LOC115705959/LOC115705926/LOC115706335/LOC115706389/LOC115706…	119
446	H3K56ac	GO:0009165	nucleotide biosynthetic process	129/8108	175/15562	3.22e-09	1.49e-07	1.11e-07	LOC115702850/LOC115703157/LOC115709998/LOC115722977/LOC115724952/LOC115704957/LOC115705607/LOC115708064/LOC115708073/LOC115709638/LOC115709698/LOC115710101/LOC115710480/LOC115710877/LOC115710919/LOC115712548/LOC115713640/LOC115699417/LOC115702325/LOC115702361/LOC115705472/LOC115705471/LOC115706092/LOC115704226/LOC115707664/LOC115705417/LOC115705524/LOC115708323/LOC115705183/LOC115708106/LOC115707…	129
447	H3K56ac	GO:0002181	cytoplasmic translation	75/8108	92/15562	3.59e-09	1.63e-07	1.22e-07	LOC115702845/LOC115706780/LOC115706765/LOC115707610/LOC115697809/LOC115706062/LOC115707808/LOC115705126/LOC115706118/LOC115706080/LOC115705447/LOC115707422/LOC115705054/LOC115704972/LOC115705178/LOC115707065/LOC115706323/LOC115706337/LOC115706521/LOC115707057/LOC115707151/LOC115707624/LOC115707989/LOC115708045/LOC115709529/LOC115710303/LOC115710090/LOC115710091/LOC115709394/LOC115714107/LOC115712…	75
448	H3K56ac	GO:0070972	protein localization to endoplasmic reticulum	49/8108	55/15562	5.08e-09	2.27e-07	1.69e-07	LOC115702727/LOC115702737/LOC115702753/LOC115702754/LOC115702343/LOC115704352/LOC115704344/LOC115702407/LOC115711387/LOC115698324/LOC115700972/LOC115702317/LOC115708339/LOC115708225/LOC115706482/LOC115706468/LOC115704770/LOC115706546/LOC115706557/LOC115706621/LOC115703577/LOC115707730/LOC115707868/LOC115711629/LOC115708714/LOC115708660/LOC115709966/LOC115714191/LOC115712636/LOC115715012/LOC115711…	49
449	H3K56ac	GO:0009123	nucleoside monophosphate metabolic process	62/8108	74/15562	1.04e-08	4.46e-07	3.33e-07	LOC115722977/LOC115702987/LOC115708073/LOC115709638/LOC115710877/LOC115710919/LOC115712548/LOC115713640/LOC115702325/LOC115705472/LOC115705471/LOC115706092/LOC115704226/LOC115705417/LOC115707803/LOC115707173/LOC115707140/LOC115707315/LOC115707550/LOC115705290/LOC115709556/LOC115710217/LOC115709792/LOC115709908/LOC115709677/LOC115709550/LOC115709549/LOC115712679/LOC115714389/LOC115712577/LOC115714…	62
450	H3K56ac	GO:0065002	intracellular protein transmembrane transport	62/8108	74/15562	1.04e-08	4.46e-07	3.33e-07	LOC115702879/LOC115702892/LOC115703009/LOC115723066/LOC115700804/LOC115702343/LOC115703223/LOC115706299/LOC115708514/LOC115711387/LOC115713121/LOC115705543/LOC115708161/LOC115706827/LOC115707514/LOC115707486/LOC115707508/LOC115707868/LOC115709349/LOC115711532/LOC115711629/LOC115708937/LOC115711406/LOC115709760/LOC115711267/LOC115710058/LOC115712478/LOC115712140/LOC115712002/LOC115712702/LOC115714…	62
451	H3K56ac	GO:0006473	protein acetylation	76/8108	95/15562	1.42e-08	5.98e-07	4.47e-07	LOC115704488/LOC115702752/LOC115702766/LOC115702813/LOC115702872/LOC115703046/LOC115703744/LOC115704855/LOC115711086/LOC115713717/LOC115713758/LOC115724500/LOC115698748/LOC115705510/LOC115706726/LOC115705830/LOC115705986/LOC115706936/LOC115706809/LOC115705931/LOC115706141/LOC115706513/LOC115706847/LOC115707295/LOC115708042/LOC115709349/LOC115709990/LOC115710710/LOC115709260/LOC115710248/LOC115708…	76
452	H3K56ac	GO:0072657	protein localization to membrane	96/8108	126/15562	2.01e-08	8.31e-07	6.21e-07	LOC115702642/LOC115702923/LOC115699346/LOC115700804/LOC115702343/LOC115708202/LOC115709308/LOC115711387/LOC115699557/LOC115702317/LOC115705836/LOC115708339/LOC115708225/LOC115705207/LOC115706468/LOC115707764/LOC115704770/LOC115705865/LOC115708159/LOC115705954/LOC115705926/LOC115706335/LOC115706557/LOC115706621/LOC115706943/LOC115705354/LOC115707868/LOC115709112/LOC115711629/LOC115708714/LOC115709…	96
453	H3K56ac	GO:0046467	membrane lipid biosynthetic process	75/8108	94/15562	2.2e-08	8.92e-07	6.66e-07	LOC115702927/LOC115702965/LOC115706555/LOC115707000/LOC115707728/LOC115708276/LOC115709151/LOC115713775/LOC115698229/LOC115700382/LOC115706029/LOC115705095/LOC115705232/LOC115706612/LOC115705557/LOC115705539/LOC115705608/LOC115706653/LOC115706893/LOC115707058/LOC115707138/LOC115707216/LOC115707765/LOC115708821/LOC115709641/LOC115709662/LOC115708830/LOC115711671/LOC115708709/LOC115714336/LOC115712…	75
454	H3K56ac	GO:0006475	internal protein amino acid acetylation	70/8108	87/15562	3.41e-08	1.29e-06	9.62e-07	LOC115704488/LOC115702752/LOC115702766/LOC115702813/LOC115702872/LOC115703046/LOC115704855/LOC115711086/LOC115713717/LOC115713758/LOC115724500/LOC115698748/LOC115705510/LOC115706726/LOC115705830/LOC115705986/LOC115706936/LOC115706809/LOC115705931/LOC115706141/LOC115706513/LOC115706847/LOC115707295/LOC115708042/LOC115709349/LOC115710710/LOC115709260/LOC115710248/LOC115708673/LOC115709306/LOC115711…	70
455	H3K56ac	GO:0016573	histone acetylation	70/8108	87/15562	3.41e-08	1.29e-06	9.62e-07	LOC115704488/LOC115702752/LOC115702766/LOC115702813/LOC115702872/LOC115703046/LOC115704855/LOC115711086/LOC115713717/LOC115713758/LOC115724500/LOC115698748/LOC115705510/LOC115706726/LOC115705830/LOC115705986/LOC115706936/LOC115706809/LOC115705931/LOC115706141/LOC115706513/LOC115706847/LOC115707295/LOC115708042/LOC115709349/LOC115710710/LOC115709260/LOC115710248/LOC115708673/LOC115709306/LOC115711…	70
456	H3K56ac	GO:0018393	internal peptidyl-lysine acetylation	70/8108	87/15562	3.41e-08	1.29e-06	9.62e-07	LOC115704488/LOC115702752/LOC115702766/LOC115702813/LOC115702872/LOC115703046/LOC115704855/LOC115711086/LOC115713717/LOC115713758/LOC115724500/LOC115698748/LOC115705510/LOC115706726/LOC115705830/LOC115705986/LOC115706936/LOC115706809/LOC115705931/LOC115706141/LOC115706513/LOC115706847/LOC115707295/LOC115708042/LOC115709349/LOC115710710/LOC115709260/LOC115710248/LOC115708673/LOC115709306/LOC115711…	70
457	H3K56ac	GO:0018394	peptidyl-lysine acetylation	70/8108	87/15562	3.41e-08	1.29e-06	9.62e-07	LOC115704488/LOC115702752/LOC115702766/LOC115702813/LOC115702872/LOC115703046/LOC115704855/LOC115711086/LOC115713717/LOC115713758/LOC115724500/LOC115698748/LOC115705510/LOC115706726/LOC115705830/LOC115705986/LOC115706936/LOC115706809/LOC115705931/LOC115706141/LOC115706513/LOC115706847/LOC115707295/LOC115708042/LOC115709349/LOC115710710/LOC115709260/LOC115710248/LOC115708673/LOC115709306/LOC115711…	70
458	H3K56ac	GO:0043414	macromolecule methylation	154/8108	220/15562	4.02e-08	1.49e-06	1.11e-06	LOC115702773/LOC115703081/LOC115703121/LOC115705920/LOC115707433/LOC115725500/LOC115703913/LOC115706453/LOC115708212/LOC115709107/LOC115710463/LOC115714021/LOC115719082/LOC115697752/LOC115698826/LOC115699010/LOC115699021/LOC115706782/LOC115708140/LOC115707975/LOC115705236/LOC115708179/LOC115705537/LOC115706751/LOC115706111/LOC115703950/LOC115707487/LOC115705051/LOC115707040/LOC115706208/LOC115707…	154
459	H3K56ac	GO:0042273	ribosomal large subunit biogenesis	77/8108	98/15562	4.98e-08	1.82e-06	1.36e-06	LOC115697311/LOC115697394/LOC115705361/LOC115708919/LOC115698624/LOC115700054/LOC115705545/LOC115704898/LOC115707808/LOC115705126/LOC115706295/LOC115705011/LOC115706595/LOC115706442/LOC115703901/LOC115705943/LOC115706030/LOC115707020/LOC115706414/LOC115707838/LOC115708052/LOC115708074/LOC115709788/LOC115709617/LOC115709415/LOC115711482/LOC115709213/LOC115709214/LOC115709215/LOC115710163/LOC115710…	77
460	H3K56ac	GO:0006839	mitochondrial transport	69/8108	86/15562	5.31e-08	1.91e-06	1.42e-06	LOC115702633/LOC115702879/LOC115702892/LOC115702923/LOC115699346/LOC115706814/LOC115708514/LOC115708695/LOC115713121/LOC115700416/LOC115705543/LOC115708161/LOC115705865/LOC115704985/LOC115706031/LOC115706722/LOC115706827/LOC115707514/LOC115708033/LOC115707559/LOC115705347/LOC115711532/LOC115711406/LOC115710058/LOC115714371/LOC115712576/LOC115714976/LOC115713039/LOC115712714/LOC115714439/LOC115712…	69
461	H3K56ac	GO:0009657	plastid organization	148/8108	211/15562	5.97e-08	2.11e-06	1.58e-06	LOC115702650/LOC115702840/LOC115702934/LOC115703174/LOC115713415/LOC115713739/LOC115721223/LOC115716371/LOC115702343/LOC115703620/LOC115703727/LOC115704378/LOC115706195/LOC115708785/LOC115711190/LOC115713910/LOC115714206/LOC115714532/LOC115697431/LOC115699901/LOC115702350/LOC115707743/LOC115705189/LOC115705033/LOC115705441/LOC115703578/LOC115705187/LOC115704656/LOC115707240/LOC115705722/LOC115705…	148
462	H3K56ac	GO:0009451	RNA modification	220/8108	331/15562	6.21e-08	2.16e-06	1.61e-06	LOC115702719/LOC115702770/LOC115702876/LOC115702907/LOC115702918/LOC115702975/LOC115703055/LOC115703081/LOC115705920/LOC115724952/LOC115700804/LOC115701640/LOC115703104/LOC115703284/LOC115703913/LOC115705321/LOC115705331/LOC115707700/LOC115710480/LOC115710828/LOC115712251/LOC115712356/LOC115712383/LOC115712419/LOC115722758/LOC115701263/LOC115706782/LOC115705236/LOC115708179/LOC115705537/LOC115706…	220
463	H3K56ac	GO:0070646	protein modification by small protein removal	57/8108	69/15562	1.13e-07	3.87e-06	2.89e-06	LOC115722421/LOC115707386/LOC115709351/LOC115717510/LOC115697495/LOC115699828/LOC115700060/LOC115700528/LOC115700579/LOC115706015/LOC115706274/LOC115706311/LOC115706574/LOC115706687/LOC115707363/LOC115705288/LOC115711378/LOC115709867/LOC115710189/LOC115712544/LOC115715287/LOC115714995/LOC115714210/LOC115714014/LOC115714233/LOC115713045/LOC115714060/LOC115714279/LOC115713969/LOC115716888/LOC115716…	57
464	H3K56ac	GO:0008033	tRNA processing	98/8108	132/15562	1.37e-07	4.61e-06	3.44e-06	LOC115702719/LOC115703081/LOC115703235/LOC115701640/LOC115703284/LOC115703913/LOC115710828/LOC115712383/LOC115706903/LOC115705236/LOC115708179/LOC115705537/LOC115704878/LOC115704040/LOC115706208/LOC115707541/LOC115707146/LOC115706052/LOC115707800/LOC115707168/LOC115706525/LOC115708129/LOC115706856/LOC115707096/LOC115707270/LOC115707550/LOC115707497/LOC115707586/LOC115707757/LOC115710303/LOC115710…	98
465	H3K56ac	GO:0090150	establishment of protein localization to membrane	83/8108	109/15562	1.9e-07	6.32e-06	4.72e-06	LOC115702642/LOC115702923/LOC115699346/LOC115700804/LOC115702343/LOC115708202/LOC115711387/LOC115702317/LOC115705836/LOC115708339/LOC115708225/LOC115705207/LOC115706468/LOC115707764/LOC115704770/LOC115705865/LOC115708159/LOC115705954/LOC115705926/LOC115706335/LOC115706557/LOC115706621/LOC115705354/LOC115707868/LOC115709112/LOC115711629/LOC115708714/LOC115709966/LOC115710116/LOC115711405/LOC115715…	83
466	H3K56ac	GO:0006626	protein targeting to mitochondrion	47/8108	55/15562	1.93e-07	6.32e-06	4.72e-06	LOC115702879/LOC115702892/LOC115702923/LOC115699346/LOC115708514/LOC115713121/LOC115705543/LOC115708161/LOC115705865/LOC115704985/LOC115706722/LOC115706827/LOC115707514/LOC115707559/LOC115711532/LOC115711406/LOC115710058/LOC115714976/LOC115712002/LOC115712702/LOC115714264/LOC115716627/LOC115715734/LOC115717977/LOC115721139/LOC115719112/LOC115721380/LOC115719610/LOC115718942/LOC115719193/LOC115721…	47
467	H3K56ac	GO:0008654	phospholipid biosynthetic process	115/8108	160/15562	2.27e-07	7.34e-06	5.48e-06	LOC115702611/LOC115708996/LOC115703150/LOC115703157/LOC115709998/LOC115702965/LOC115708276/LOC115709308/LOC115709620/LOC115710352/LOC115710976/LOC115711722/LOC115698229/LOC115705473/LOC115705468/LOC115705504/LOC115705441/LOC115705095/LOC115705232/LOC115705879/LOC115705116/LOC115705585/LOC115705608/LOC115705751/LOC115705753/LOC115707523/LOC115706862/LOC115707138/LOC115707158/LOC115707180/LOC115707…	115
468	H3K56ac	GO:0044743	protein transmembrane import into intracellular organelle	39/8108	44/15562	2.76e-07	8.8e-06	6.57e-06	LOC115702879/LOC115702892/LOC115723066/LOC115700804/LOC115706299/LOC115708514/LOC115713121/LOC115705543/LOC115708161/LOC115706827/LOC115707514/LOC115707486/LOC115709349/LOC115711532/LOC115708937/LOC115711406/LOC115711267/LOC115710058/LOC115712478/LOC115712002/LOC115712702/LOC115714264/LOC115717040/LOC115716095/LOC115719112/LOC115719179/LOC115719379/LOC115721380/LOC115722280/LOC115722732/LOC115721…	39
469	H3K56ac	GO:0006664	glycolipid metabolic process	52/8108	63/15562	4.33e-07	1.34e-05	1e-05	LOC115702965/LOC115707000/LOC115707728/LOC115708276/LOC115712025/LOC115698229/LOC115705095/LOC115705232/LOC115705557/LOC115705539/LOC115705608/LOC115706653/LOC115707138/LOC115707216/LOC115707765/LOC115708821/LOC115709641/LOC115708830/LOC115711671/LOC115708709/LOC115714336/LOC115714585/LOC115714113/LOC115714501/LOC115712942/LOC115717414/LOC115715747/LOC115716892/LOC115717365/LOC115717304/LOC115718…	52
470	H3K56ac	GO:1903509	liposaccharide metabolic process	52/8108	63/15562	4.33e-07	1.34e-05	1e-05	LOC115702965/LOC115707000/LOC115707728/LOC115708276/LOC115712025/LOC115698229/LOC115705095/LOC115705232/LOC115705557/LOC115705539/LOC115705608/LOC115706653/LOC115707138/LOC115707216/LOC115707765/LOC115708821/LOC115709641/LOC115708830/LOC115711671/LOC115708709/LOC115714336/LOC115714585/LOC115714113/LOC115714501/LOC115712942/LOC115717414/LOC115715747/LOC115716892/LOC115717365/LOC115717304/LOC115718…	52
471	H3K56ac	GO:0019693	ribose phosphate metabolic process	152/8108	222/15562	4.49e-07	1.37e-05	1.02e-05	LOC115702783/LOC115702836/LOC115702850/LOC115724952/LOC115704378/LOC115704957/LOC115705607/LOC115707610/LOC115708064/LOC115708073/LOC115709698/LOC115710101/LOC115710480/LOC115710877/LOC115710919/LOC115711259/LOC115711637/LOC115711722/LOC115712548/LOC115713640/LOC115723768/LOC115701945/LOC115702002/LOC115702361/LOC115705137/LOC115705136/LOC115705163/LOC115706092/LOC115707664/LOC115705417/LOC115705…	152
472	H3K56ac	GO:0010629	negative regulation of gene expression	239/8108	370/15562	5.99e-07	1.81e-05	1.35e-05	LOC115702592/LOC115704488/LOC115702736/LOC115702813/LOC115703078/LOC115703195/LOC115703251/LOC115707433/LOC115696485/LOC115695269/LOC115702759/LOC115702778/LOC115703071/LOC115703104/LOC115703796/LOC115704745/LOC115704249/LOC115704391/LOC115706453/LOC115709095/LOC115709368/LOC115710310/LOC115711694/LOC115712195/LOC115714021/LOC115697325/LOC115695344/LOC115698748/LOC115699021/LOC115700469/LOC115700…	239
473	H3K56ac	GO:0070585	protein localization to mitochondrion	49/8108	59/15562	6.48e-07	1.9e-05	1.42e-05	LOC115702879/LOC115702892/LOC115702923/LOC115699346/LOC115708514/LOC115713121/LOC115705543/LOC115708161/LOC115705865/LOC115704985/LOC115706722/LOC115706827/LOC115707514/LOC115707559/LOC115711532/LOC115711406/LOC115710058/LOC115714976/LOC115712002/LOC115712702/LOC115714264/LOC115716627/LOC115715734/LOC115717977/LOC115716410/LOC115721139/LOC115720973/LOC115719112/LOC115721380/LOC115719610/LOC115718…	49
474	H3K56ac	GO:0072655	establishment of protein localization to mitochondrion	49/8108	59/15562	6.48e-07	1.9e-05	1.42e-05	LOC115702879/LOC115702892/LOC115702923/LOC115699346/LOC115708514/LOC115713121/LOC115705543/LOC115708161/LOC115705865/LOC115704985/LOC115706722/LOC115706827/LOC115707514/LOC115707559/LOC115711532/LOC115711406/LOC115710058/LOC115714976/LOC115712002/LOC115712702/LOC115714264/LOC115716627/LOC115715734/LOC115717977/LOC115716410/LOC115721139/LOC115720973/LOC115719112/LOC115721380/LOC115719610/LOC115718…	49
475	H3K56ac	GO:0006400	tRNA modification	76/8108	100/15562	7.12e-07	2.06e-05	1.54e-05	LOC115702719/LOC115703081/LOC115701640/LOC115703284/LOC115703913/LOC115710828/LOC115712383/LOC115705236/LOC115708179/LOC115705537/LOC115704040/LOC115706208/LOC115707541/LOC115707146/LOC115707800/LOC115707168/LOC115706525/LOC115708129/LOC115706856/LOC115707270/LOC115707550/LOC115707586/LOC115707757/LOC115710303/LOC115710710/LOC115711398/LOC115708829/LOC115711640/LOC115710248/LOC115710263/LOC115710…	76
476	H3K56ac	GO:0034976	response to endoplasmic reticulum stress	57/8108	71/15562	7.45e-07	2.13e-05	1.59e-05	LOC115702597/LOC115702951/LOC115705652/LOC115714059/LOC115700360/LOC115701199/LOC115702317/LOC115706612/LOC115707655/LOC115706276/LOC115706366/LOC115707195/LOC115707301/LOC115707402/LOC115707782/LOC115707847/LOC115709633/LOC115709618/LOC115709563/LOC115712498/LOC115712378/LOC115712760/LOC115712237/LOC115715083/LOC115712804/LOC115714454/LOC115716778/LOC115717050/LOC115717316/LOC115719484/LOC115719…	57
477	H3K56ac	GO:0009259	ribonucleotide metabolic process	147/8108	215/15562	7.86e-07	2.22e-05	1.66e-05	LOC115702783/LOC115702836/LOC115702850/LOC115724952/LOC115704378/LOC115704957/LOC115705607/LOC115707610/LOC115708064/LOC115708073/LOC115709698/LOC115710101/LOC115710480/LOC115710877/LOC115711259/LOC115711637/LOC115711722/LOC115712548/LOC115713640/LOC115723768/LOC115701945/LOC115702002/LOC115702361/LOC115705137/LOC115705136/LOC115705163/LOC115706092/LOC115707664/LOC115705417/LOC115705524/LOC115708…	147
478	H3K56ac	GO:0006413	translational initiation	178/8108	267/15562	8.15e-07	2.27e-05	1.7e-05	LOC115702736/LOC115702805/LOC115704947/LOC115705885/LOC115704346/LOC115716423/LOC115702507/LOC115703885/LOC115704449/LOC115705607/LOC115706780/LOC115706765/LOC115707000/LOC115707512/LOC115707589/LOC115707610/LOC115708082/LOC115709318/LOC115709527/LOC115710319/LOC115710578/LOC115712599/LOC115713758/LOC115697162/LOC115697809/LOC115705994/LOC115706608/LOC115706118/LOC115707202/LOC115705561/LOC115705…	178
479	H3K56ac	GO:0007034	vacuolar transport	66/8108	85/15562	9.9e-07	2.72e-05	2.03e-05	LOC115703086/LOC115703087/LOC115705660/LOC115714437/LOC115713700/LOC115715804/LOC115697285/LOC115707485/LOC115707165/LOC115705534/LOC115705862/LOC115705150/LOC115705223/LOC115706098/LOC115707170/LOC115706458/LOC115706355/LOC115705781/LOC115705957/LOC115706166/LOC115706883/LOC115707542/LOC115707615/LOC115707618/LOC115709281/LOC115710138/LOC115709432/LOC115708998/LOC115709400/LOC115710155/LOC115715…	66
480	H3K56ac	GO:0046940	nucleoside monophosphate phosphorylation	25/8108	26/15562	1.06e-06	2.89e-05	2.16e-05	LOC115722977/LOC115709638/LOC115710877/LOC115702325/LOC115705472/LOC115705471/LOC115704226/LOC115707803/LOC115707173/LOC115707140/LOC115705290/LOC115710217/LOC115709908/LOC115714389/LOC115712577/LOC115714531/LOC115714977/LOC115721004/LOC115720958/LOC115718455/LOC115722352/LOC115725156/LOC115697333/LOC115697471/LOC115700487	25
481	H3K56ac	GO:0007030	Golgi organization	31/8108	34/15562	1.19e-06	3.2e-05	2.39e-05	LOC115705660/LOC115697109/LOC115706048/LOC115705466/LOC115706980/LOC115707137/LOC115707408/LOC115707542/LOC115709316/LOC115711985/LOC115717582/LOC115716110/LOC115715645/LOC115716017/LOC115720988/LOC115719647/LOC115724067/LOC115723463/LOC115721706/LOC115723185/LOC115723394/LOC115695685/LOC115694753/LOC115695863/LOC115700553/LOC115700639/LOC115700842/LOC115700978/LOC115700451/LOC115698795/LOC115702…	31
482	H3K56ac	GO:0042157	lipoprotein metabolic process	63/8108	81/15562	1.57e-06	4.17e-05	3.11e-05	LOC115702642/LOC115717286/LOC115702965/LOC115708276/LOC115708202/LOC115698229/LOC115705836/LOC115705095/LOC115707577/LOC115703955/LOC115707764/LOC115708159/LOC115705608/LOC115705954/LOC115706335/LOC115707216/LOC115707378/LOC115707379/LOC115707830/LOC115708821/LOC115709112/LOC115709641/LOC115711671/LOC115708709/LOC115712379/LOC115714585/LOC115714113/LOC115714501/LOC115712942/LOC115717414/LOC115715…	63
483	H3K56ac	GO:0009247	glycolipid biosynthetic process	49/8108	60/15562	1.74e-06	4.55e-05	3.39e-05	LOC115702965/LOC115707000/LOC115707728/LOC115708276/LOC115698229/LOC115705095/LOC115705232/LOC115705557/LOC115705539/LOC115705608/LOC115706653/LOC115707138/LOC115707216/LOC115707765/LOC115708821/LOC115709641/LOC115708830/LOC115711671/LOC115708709/LOC115714336/LOC115714585/LOC115714113/LOC115714501/LOC115712942/LOC115717414/LOC115715747/LOC115716892/LOC115717365/LOC115717304/LOC115718666/LOC115718…	49
484	H3K56ac	GO:0002183	cytoplasmic translational initiation	33/8108	37/15562	1.75e-06	4.55e-05	3.39e-05	LOC115706780/LOC115706765/LOC115707610/LOC115697809/LOC115706118/LOC115705447/LOC115707422/LOC115707065/LOC115706337/LOC115706521/LOC115707989/LOC115708045/LOC115710090/LOC115710091/LOC115713052/LOC115716352/LOC115715990/LOC115715969/LOC115719628/LOC115719292/LOC115722188/LOC115722800/LOC115722050/LOC115722294/LOC115722858/LOC115725468/LOC115698278/LOC115697001/LOC115697173/LOC115700890/LOC115699…	33
485	H3K56ac	GO:0016050	vesicle organization	64/8108	83/15562	2.23e-06	5.71e-05	4.27e-05	LOC115704956/LOC115713633/LOC115714437/LOC115708838/LOC115713350/LOC115714343/LOC115720112/LOC115699031/LOC115708180/LOC115707485/LOC115705862/LOC115706098/LOC115708096/LOC115707687/LOC115705957/LOC115707553/LOC115706166/LOC115707025/LOC115707137/LOC115707542/LOC115707910/LOC115711242/LOC115709281/LOC115709432/LOC115715190/LOC115712752/LOC115712711/LOC115714800/LOC115714883/LOC115714478/LOC115717…	64
486	H3K56ac	GO:0045047	protein targeting to ER	32/8108	36/15562	3.02e-06	7.56e-05	5.65e-05	LOC115702343/LOC115711387/LOC115702317/LOC115708339/LOC115708225/LOC115706482/LOC115706468/LOC115704770/LOC115706546/LOC115706557/LOC115706621/LOC115707868/LOC115711629/LOC115708714/LOC115708660/LOC115709966/LOC115712636/LOC115711921/LOC115714092/LOC115716045/LOC115721177/LOC115718579/LOC115719404/LOC115719708/LOC115724624/LOC115724604/LOC115725636/LOC115695944/LOC115696973/LOC115698021/LOC115699…	32
487	H3K56ac	GO:0072599	establishment of protein localization to endoplasmic reticulum	32/8108	36/15562	3.02e-06	7.56e-05	5.65e-05	LOC115702343/LOC115711387/LOC115702317/LOC115708339/LOC115708225/LOC115706482/LOC115706468/LOC115704770/LOC115706546/LOC115706557/LOC115706621/LOC115707868/LOC115711629/LOC115708714/LOC115708660/LOC115709966/LOC115712636/LOC115711921/LOC115714092/LOC115716045/LOC115721177/LOC115718579/LOC115719404/LOC115719708/LOC115724624/LOC115724604/LOC115725636/LOC115695944/LOC115696973/LOC115698021/LOC115699…	32
488	H3K56ac	GO:0006163	purine nucleotide metabolic process	142/8108	210/15562	3.16e-06	7.82e-05	5.84e-05	LOC115702783/LOC115702836/LOC115702850/LOC115703193/LOC115724952/LOC115704378/LOC115704957/LOC115705607/LOC115707610/LOC115708073/LOC115709638/LOC115709698/LOC115710101/LOC115710480/LOC115710877/LOC115710919/LOC115711259/LOC115711637/LOC115711722/LOC115712548/LOC115713640/LOC115723768/LOC115701945/LOC115702002/LOC115702325/LOC115702361/LOC115705137/LOC115705136/LOC115705163/LOC115706092/LOC115707…	142
489	H3K56ac	GO:0046390	ribose phosphate biosynthetic process	84/8108	115/15562	3.28e-06	8.02e-05	5.99e-05	LOC115702850/LOC115724952/LOC115704957/LOC115705607/LOC115708064/LOC115708073/LOC115709698/LOC115710101/LOC115710480/LOC115710877/LOC115710919/LOC115712548/LOC115713640/LOC115702361/LOC115706092/LOC115707664/LOC115705417/LOC115705524/LOC115708323/LOC115705183/LOC115708106/LOC115706093/LOC115707018/LOC115707115/LOC115707116/LOC115707550/LOC115707697/LOC115705347/LOC115707949/LOC115709556/LOC115709…	84
490	H3K56ac	GO:0006497	protein lipidation	61/8108	79/15562	3.55e-06	8.51e-05	6.35e-05	LOC115702642/LOC115717286/LOC115702965/LOC115708276/LOC115708202/LOC115698229/LOC115705836/LOC115705095/LOC115707577/LOC115703955/LOC115707764/LOC115708159/LOC115705608/LOC115705954/LOC115706335/LOC115707216/LOC115707830/LOC115708821/LOC115709112/LOC115709641/LOC115711671/LOC115708709/LOC115712379/LOC115714585/LOC115714113/LOC115714501/LOC115712942/LOC115717414/LOC115715747/LOC115716892/LOC115717…	61
491	H3K56ac	GO:0042158	lipoprotein biosynthetic process	61/8108	79/15562	3.55e-06	8.51e-05	6.35e-05	LOC115702642/LOC115717286/LOC115702965/LOC115708276/LOC115708202/LOC115698229/LOC115705836/LOC115705095/LOC115707577/LOC115703955/LOC115707764/LOC115708159/LOC115705608/LOC115705954/LOC115706335/LOC115707216/LOC115707830/LOC115708821/LOC115709112/LOC115709641/LOC115711671/LOC115708709/LOC115712379/LOC115714585/LOC115714113/LOC115714501/LOC115712942/LOC115717414/LOC115715747/LOC115716892/LOC115717…	61
492	H3K56ac	GO:1990542	mitochondrial transmembrane transport	43/8108	52/15562	4.02e-06	9.53e-05	7.12e-05	LOC115702879/LOC115702892/LOC115706814/LOC115708514/LOC115708695/LOC115713121/LOC115698883/LOC115700416/LOC115705543/LOC115708161/LOC115706031/LOC115706827/LOC115707514/LOC115708033/LOC115705347/LOC115711532/LOC115711406/LOC115710058/LOC115714371/LOC115712576/LOC115713039/LOC115714439/LOC115712002/LOC115712702/LOC115714264/LOC115716787/LOC115719112/LOC115721380/LOC115718747/LOC115719568/LOC115722…	43
493	H3K56ac	GO:0016197	endosomal transport	53/8108	67/15562	4.25e-06	9.97e-05	7.45e-05	LOC115702675/LOC115702864/LOC115705660/LOC115714437/LOC115710763/LOC115713143/LOC115713700/LOC115724246/LOC115707648/LOC115704658/LOC115707165/LOC115705534/LOC115705862/LOC115706098/LOC115707170/LOC115706355/LOC115705959/LOC115705957/LOC115706430/LOC115706883/LOC115707542/LOC115707615/LOC115709281/LOC115710138/LOC115709573/LOC115715190/LOC115712667/LOC115712807/LOC115712887/LOC115716651/LOC115717…	53
494	H3K56ac	GO:0009260	ribonucleotide biosynthetic process	81/8108	111/15562	5.2e-06	0.000120776	9.02e-05	LOC115702850/LOC115724952/LOC115704957/LOC115705607/LOC115708064/LOC115708073/LOC115709698/LOC115710101/LOC115710480/LOC115710877/LOC115712548/LOC115713640/LOC115702361/LOC115706092/LOC115707664/LOC115705417/LOC115705524/LOC115708323/LOC115705183/LOC115708106/LOC115706093/LOC115707018/LOC115707115/LOC115707116/LOC115707550/LOC115707697/LOC115705347/LOC115707949/LOC115709556/LOC115709744/LOC115709…	81
495	H3K56ac	GO:0015931	nucleobase-containing compound transport	116/8108	168/15562	5.34e-06	0.000122717	9.16e-05	LOC115702633/LOC115702808/LOC115702846/LOC115705296/LOC115706487/LOC115706814/LOC115706944/LOC115707318/LOC115708731/LOC115708785/LOC115709724/LOC115712334/LOC115712441/LOC115712930/LOC115719232/LOC115699977/LOC115702314/LOC115705580/LOC115706796/LOC115707051/LOC115704850/LOC115705663/LOC115705659/LOC115705095/LOC115705463/LOC115705449/LOC115703574/LOC115708273/LOC115708306/LOC115705555/LOC115706…	116
496	H3K56ac	GO:0006665	sphingolipid metabolic process	40/8108	48/15562	6.03e-06	0.000137154	0.000102402	LOC115702927/LOC115706555/LOC115709151/LOC115712025/LOC115713775/LOC115700382/LOC115706113/LOC115706556/LOC115706029/LOC115704904/LOC115706612/LOC115705557/LOC115708206/LOC115706893/LOC115707058/LOC115709734/LOC115709662/LOC115713224/LOC115712929/LOC115714440/LOC115712891/LOC115716311/LOC115717316/LOC115718761/LOC115719287/LOC115719383/LOC115722446/LOC115722142/LOC115722810/LOC115722940/LOC115724…	40
497	H3K56ac	GO:0031123	RNA 3'-end processing	52/8108	66/15562	6.51e-06	0.000146598	0.000109452	LOC115702617/LOC115704488/LOC115703071/LOC115707493/LOC115712297/LOC115712646/LOC115724500/LOC115699992/LOC115705454/LOC115705691/LOC115706052/LOC115705625/LOC115705730/LOC115708113/LOC115706636/LOC115707497/LOC115709390/LOC115710246/LOC115711551/LOC115711193/LOC115713019/LOC115711981/LOC115714094/LOC115716882/LOC115716829/LOC115717042/LOC115719110/LOC115721164/LOC115722109/LOC115722942/LOC115723…	52
498	H3K56ac	GO:0006457	protein folding	135/8108	201/15562	9.39e-06	0.000209288	0.000156258	LOC115702879/LOC115702892/LOC115704221/LOC115715228/LOC115717462/LOC115697104/LOC115704427/LOC115704638/LOC115705122/LOC115705652/LOC115706704/LOC115706888/LOC115707344/LOC115707973/LOC115708359/LOC115710712/LOC115712085/LOC115722410/LOC115713121/LOC115702317/LOC115703671/LOC115705067/LOC115707449/LOC115706040/LOC115708161/LOC115706834/LOC115705383/LOC115705206/LOC115705569/LOC115705392/LOC115704…	135
499	H3K56ac	GO:0032984	protein-containing complex disassembly	53/8108	68/15562	9.5e-06	0.000209671	0.000156544	LOC115702674/LOC115702784/LOC115702799/LOC115713003/LOC115716371/LOC115722977/LOC115704651/LOC115712375/LOC115712383/LOC115724500/LOC115699818/LOC115704024/LOC115705850/LOC115706539/LOC115703595/LOC115709618/LOC115709883/LOC115711537/LOC115709394/LOC115709962/LOC115710014/LOC115709152/LOC115712587/LOC115712807/LOC115714084/LOC115714546/LOC115714393/LOC115713918/LOC115714208/LOC115717561/LOC115716…	53
500	H3K56ac	GO:0043038	amino acid activation	51/8108	65/15562	9.94e-06	0.000215046	0.000160557	LOC115702839/LOC115702840/LOC115721396/LOC115712436/LOC115701640/LOC115710161/LOC115700204/LOC115706732/LOC115707642/LOC115707768/LOC115705201/LOC115705499/LOC115705608/LOC115707707/LOC115707980/LOC115709785/LOC115709462/LOC115709781/LOC115710157/LOC115712744/LOC115714684/LOC115714501/LOC115712942/LOC115717187/LOC115715724/LOC115716790/LOC115716018/LOC115718966/LOC115719760/LOC115718877/LOC115719…	51
501	H3K56ac	GO:0043039	tRNA aminoacylation	51/8108	65/15562	9.94e-06	0.000215046	0.000160557	LOC115702839/LOC115702840/LOC115721396/LOC115712436/LOC115701640/LOC115710161/LOC115700204/LOC115706732/LOC115707642/LOC115707768/LOC115705201/LOC115705499/LOC115705608/LOC115707707/LOC115707980/LOC115709785/LOC115709462/LOC115709781/LOC115710157/LOC115712744/LOC115714684/LOC115714501/LOC115712942/LOC115717187/LOC115715724/LOC115716790/LOC115716018/LOC115718966/LOC115719760/LOC115718877/LOC115719…	51
502	H3K56ac	GO:0006418	tRNA aminoacylation for protein translation	49/8108	62/15562	1.03e-05	0.000220526	0.000164648	LOC115702839/LOC115702840/LOC115721396/LOC115712436/LOC115701640/LOC115710161/LOC115700204/LOC115706732/LOC115707642/LOC115707768/LOC115705201/LOC115705499/LOC115705608/LOC115707707/LOC115707980/LOC115709785/LOC115709462/LOC115709781/LOC115710157/LOC115712744/LOC115714684/LOC115714501/LOC115712942/LOC115717187/LOC115715724/LOC115716790/LOC115716018/LOC115718966/LOC115719760/LOC115718877/LOC115719…	49
503	H3K56ac	GO:0016579	protein deubiquitination	45/8108	56/15562	1.06e-05	0.000225523	0.000168379	LOC115722421/LOC115707386/LOC115709351/LOC115717510/LOC115697495/LOC115699828/LOC115700528/LOC115706015/LOC115706274/LOC115706311/LOC115706687/LOC115707363/LOC115705288/LOC115711378/LOC115709867/LOC115710189/LOC115715287/LOC115714995/LOC115714210/LOC115714014/LOC115714233/LOC115713045/LOC115714060/LOC115714279/LOC115716888/LOC115716090/LOC115716980/LOC115716970/LOC115716700/LOC115715607/LOC115719…	45
504	H3K56ac	GO:0072521	purine-containing compound metabolic process	154/8108	234/15562	1.31e-05	0.000275813	0.000205927	LOC115702783/LOC115702836/LOC115702850/LOC115703193/LOC115724952/LOC115703913/LOC115704378/LOC115704957/LOC115705607/LOC115707610/LOC115708073/LOC115709638/LOC115709698/LOC115710101/LOC115710480/LOC115710877/LOC115710919/LOC115711259/LOC115711637/LOC115711722/LOC115712548/LOC115713640/LOC115723768/LOC115698624/LOC115701945/LOC115702002/LOC115702325/LOC115702361/LOC115702364/LOC115705137/LOC115705…	154
505	H3K56ac	GO:0006661	phosphatidylinositol biosynthetic process	61/8108	81/15562	1.47e-05	0.000305494	0.000228087	LOC115702611/LOC115708996/LOC115703150/LOC115702965/LOC115708276/LOC115709308/LOC115709620/LOC115710352/LOC115710976/LOC115698229/LOC115705095/LOC115705585/LOC115705608/LOC115707523/LOC115706862/LOC115707158/LOC115707180/LOC115707216/LOC115707333/LOC115708821/LOC115709641/LOC115711671/LOC115708709/LOC115712809/LOC115713047/LOC115714680/LOC115714349/LOC115714923/LOC115712761/LOC115714585/LOC115714…	61
506	H3K56ac	GO:0019395	fatty acid oxidation	29/8108	33/15562	1.51e-05	0.000311817	0.000232808	LOC115723066/LOC115706299/LOC115708301/LOC115706117/LOC115706832/LOC115706950/LOC115707261/LOC115707486/LOC115707697/LOC115712181/LOC115712180/LOC115714493/LOC115714555/LOC115715988/LOC115717342/LOC115719179/LOC115720660/LOC115723785/LOC115722169/LOC115722296/LOC115723201/LOC115696900/LOC115698204/LOC115697235/LOC115699135/LOC115699150/LOC115699414/LOC115702146/LOC115702272	29
507	H3K56ac	GO:0022411	cellular component disassembly	66/8108	89/15562	1.59e-05	0.000325725	0.000243192	LOC115702674/LOC115702784/LOC115702799/LOC115702917/LOC115713003/LOC115716371/LOC115722977/LOC115704651/LOC115712375/LOC115712383/LOC115724500/LOC115699818/LOC115704024/LOC115705850/LOC115706539/LOC115703595/LOC115707830/LOC115709618/LOC115709883/LOC115711537/LOC115709394/LOC115709962/LOC115710014/LOC115709152/LOC115712587/LOC115712807/LOC115714084/LOC115714546/LOC115714295/LOC115714393/LOC115713…	66
508	H3K56ac	GO:0009790	embryo development	174/8108	269/15562	1.74e-05	0.000352777	0.000263389	LOC115702861/LOC115702918/LOC115703078/LOC115722899/LOC115723387/LOC115701640/LOC115703061/LOC115703727/LOC115706299/LOC115709817/LOC115710094/LOC115710161/LOC115710310/LOC115710594/LOC115713424/LOC115718911/LOC115724500/LOC115702350/LOC115706048/LOC115707648/LOC115704658/LOC115706606/LOC115706118/LOC115706732/LOC115705658/LOC115706082/LOC115706211/LOC115704840/LOC115707577/LOC115703573/LOC115705…	174
509	H3K56ac	GO:0006479	protein methylation	79/8108	110/15562	1.81e-05	0.000359902	0.00026871	LOC115702773/LOC115703121/LOC115707433/LOC115706453/LOC115708212/LOC115709107/LOC115714021/LOC115719082/LOC115697752/LOC115698826/LOC115699021/LOC115708140/LOC115707975/LOC115706111/LOC115707487/LOC115705051/LOC115707040/LOC115707890/LOC115705155/LOC115706212/LOC115706829/LOC115707534/LOC115711269/LOC115710710/LOC115708829/LOC115711640/LOC115709326/LOC115709959/LOC115715072/LOC115714503/LOC115712…	79
510	H3K56ac	GO:0008213	protein alkylation	79/8108	110/15562	1.81e-05	0.000359902	0.00026871	LOC115702773/LOC115703121/LOC115707433/LOC115706453/LOC115708212/LOC115709107/LOC115714021/LOC115719082/LOC115697752/LOC115698826/LOC115699021/LOC115708140/LOC115707975/LOC115706111/LOC115707487/LOC115705051/LOC115707040/LOC115707890/LOC115705155/LOC115706212/LOC115706829/LOC115707534/LOC115711269/LOC115710710/LOC115708829/LOC115711640/LOC115709326/LOC115709959/LOC115715072/LOC115714503/LOC115712…	79
511	H3K56ac	GO:0051128	regulation of cellular component organization	175/8108	271/15562	1.91e-05	0.000375811	0.000280587	LOC115702674/LOC115702784/LOC115702799/LOC115703082/LOC115703121/LOC115722899/LOC115704956/LOC115716751/LOC115703596/LOC115704038/LOC115704802/LOC115710763/LOC115712375/LOC115712383/LOC115714117/LOC115697752/LOC115699147/LOC115701199/LOC115706608/LOC115706060/LOC115705653/LOC115706681/LOC115706726/LOC115707955/LOC115706082/LOC115707487/LOC115705214/LOC115705155/LOC115704754/LOC115704365/LOC115705…	175
512	H3K56ac	GO:0015748	organophosphate ester transport	62/8108	83/15562	1.95e-05	0.000380585	0.000284151	LOC115702633/LOC115706487/LOC115706814/LOC115706944/LOC115708785/LOC115709724/LOC115698271/LOC115699977/LOC115704850/LOC115705663/LOC115705659/LOC115703574/LOC115705555/LOC115705590/LOC115705589/LOC115706563/LOC115705700/LOC115707009/LOC115707036/LOC115707857/LOC115705272/LOC115711611/LOC115711222/LOC115709322/LOC115710007/LOC115709748/LOC115708782/LOC115712350/LOC115715311/LOC115715086/LOC115714…	62
513	H3K56ac	GO:0032940	secretion by cell	51/8108	66/15562	2.16e-05	0.000418384	0.000312373	LOC115702608/LOC115702674/LOC115703124/LOC115703160/LOC115702605/LOC115705833/LOC115709655/LOC115710763/LOC115698548/LOC115700150/LOC115700291/LOC115705534/LOC115705400/LOC115705939/LOC115705926/LOC115707553/LOC115706389/LOC115707117/LOC115711282/LOC115710297/LOC115709365/LOC115713924/LOC115714571/LOC115714478/LOC115712600/LOC115716128/LOC115715729/LOC115717103/LOC115715665/LOC115721435/LOC115721…	51
514	H3K56ac	GO:0009658	chloroplast organization	108/8108	158/15562	2.24e-05	0.000430082	0.000321107	LOC115702650/LOC115702840/LOC115702934/LOC115703174/LOC115713739/LOC115721223/LOC115716371/LOC115702343/LOC115703727/LOC115704378/LOC115706195/LOC115708785/LOC115711190/LOC115713910/LOC115714206/LOC115714532/LOC115697431/LOC115702350/LOC115707743/LOC115705033/LOC115703578/LOC115705187/LOC115704656/LOC115706291/LOC115706542/LOC115706819/LOC115707563/LOC115705281/LOC115709531/LOC115711256/LOC115709…	108
515	H3K56ac	GO:0006520	cellular amino acid metabolic process	262/8108	423/15562	2.26e-05	0.00043061	0.000321501	LOC115702620/LOC115702618/LOC115702629/LOC115702672/LOC115702839/LOC115702840/LOC115702853/LOC115702854/LOC115702859/LOC115702934/LOC115702935/LOC115702968/LOC115702972/LOC115703006/LOC115703014/LOC115703195/LOC115703222/LOC115721396/LOC115712436/LOC115713573/LOC115715228/LOC115718543/LOC115701640/LOC115703995/LOC115704012/LOC115704142/LOC115706428/LOC115707082/LOC115708064/LOC115708896/LOC115709…	262
516	H3K56ac	GO:0009150	purine ribonucleotide metabolic process	130/8108	195/15562	2.38e-05	0.000449322	0.000335471	LOC115702783/LOC115702836/LOC115702850/LOC115724952/LOC115704378/LOC115704957/LOC115705607/LOC115707610/LOC115708073/LOC115709698/LOC115710101/LOC115710480/LOC115711259/LOC115711637/LOC115711722/LOC115712548/LOC115713640/LOC115723768/LOC115701945/LOC115702002/LOC115702361/LOC115705137/LOC115705136/LOC115705163/LOC115706092/LOC115707664/LOC115705417/LOC115708323/LOC115705721/LOC115705116/LOC115705…	130
517	H3K56ac	GO:0043484	regulation of RNA splicing	41/8108	51/15562	2.59e-05	0.00048469	0.000361878	LOC115715318/LOC115696283/LOC115696009/LOC115708219/LOC115712402/LOC115706268/LOC115705478/LOC115705553/LOC115705922/LOC115706160/LOC115706184/LOC115706600/LOC115705305/LOC115709173/LOC115710188/LOC115710249/LOC115710191/LOC115709457/LOC115709944/LOC115713797/LOC115713961/LOC115714428/LOC115716841/LOC115716696/LOC115718181/LOC115716272/LOC115716721/LOC115720794/LOC115719369/LOC115722691/LOC115722…	41
518	H3K56ac	GO:0046488	phosphatidylinositol metabolic process	73/8108	101/15562	2.61e-05	0.00048469	0.000361878	LOC115702611/LOC115702729/LOC115708996/LOC115702962/LOC115702971/LOC115703150/LOC115702965/LOC115708276/LOC115709308/LOC115709620/LOC115710352/LOC115710976/LOC115698229/LOC115705095/LOC115705585/LOC115705608/LOC115708317/LOC115706104/LOC115707523/LOC115706862/LOC115707158/LOC115707180/LOC115707216/LOC115707333/LOC115708049/LOC115708821/LOC115709641/LOC115711671/LOC115708709/LOC115712809/LOC115713…	73
519	H3K56ac	GO:0009890	negative regulation of biosynthetic process	173/8108	269/15562	2.99e-05	0.000550872	0.000411291	LOC115702592/LOC115704488/LOC115702736/LOC115702766/LOC115702813/LOC115703078/LOC115705832/LOC115707433/LOC115695222/LOC115702759/LOC115702778/LOC115703071/LOC115703697/LOC115704745/LOC115706453/LOC115709095/LOC115710310/LOC115711315/LOC115711619/LOC115711694/LOC115712195/LOC115714021/LOC115722563/LOC115697325/LOC115698748/LOC115699021/LOC115700469/LOC115700622/LOC115701871/LOC115702261/LOC115705…	173
520	H3K56ac	GO:0051604	protein maturation	74/8108	103/15562	3.24e-05	0.000591076	0.000441308	LOC115702913/LOC115703144/LOC115710389/LOC115703744/LOC115706027/LOC115708757/LOC115710440/LOC115718911/LOC115697785/LOC115699243/LOC115699901/LOC115705189/LOC115706482/LOC115705986/LOC115704985/LOC115705515/LOC115705482/LOC115706413/LOC115705797/LOC115706415/LOC115706544/LOC115706722/LOC115707533/LOC115707559/LOC115709990/LOC115710183/LOC115709737/LOC115708811/LOC115709684/LOC115710000/LOC115708…	74
521	H3K56ac	GO:0006612	protein targeting to membrane	57/8108	76/15562	3.43e-05	0.000620725	0.000463444	LOC115702642/LOC115700804/LOC115702343/LOC115708202/LOC115711387/LOC115702317/LOC115705836/LOC115708339/LOC115708225/LOC115706468/LOC115707764/LOC115704770/LOC115708159/LOC115705954/LOC115705926/LOC115706335/LOC115706557/LOC115706621/LOC115707868/LOC115709112/LOC115711629/LOC115708714/LOC115709966/LOC115711405/LOC115712478/LOC115712636/LOC115712379/LOC115711921/LOC115714092/LOC115717040/LOC115716…	57
522	H3K56ac	GO:0006505	GPI anchor metabolic process	32/8108	38/15562	3.51e-05	0.000620725	0.000463444	LOC115702965/LOC115708276/LOC115698229/LOC115705095/LOC115705608/LOC115707216/LOC115708821/LOC115709641/LOC115711671/LOC115708709/LOC115714585/LOC115714113/LOC115714501/LOC115712942/LOC115717414/LOC115715747/LOC115716892/LOC115717365/LOC115717304/LOC115718666/LOC115718536/LOC115718409/LOC115719752/LOC115718627/LOC115722477/LOC115724120/LOC115695642/LOC115725084/LOC115725508/LOC115696880/LOC115697…	32
523	H3K56ac	GO:0006506	GPI anchor biosynthetic process	32/8108	38/15562	3.51e-05	0.000620725	0.000463444	LOC115702965/LOC115708276/LOC115698229/LOC115705095/LOC115705608/LOC115707216/LOC115708821/LOC115709641/LOC115711671/LOC115708709/LOC115714585/LOC115714113/LOC115714501/LOC115712942/LOC115717414/LOC115715747/LOC115716892/LOC115717365/LOC115717304/LOC115718666/LOC115718536/LOC115718409/LOC115719752/LOC115718627/LOC115722477/LOC115724120/LOC115695642/LOC115725084/LOC115725508/LOC115696880/LOC115697…	32
524	H3K56ac	GO:0006892	post-Golgi vesicle-mediated transport	32/8108	38/15562	3.51e-05	0.000620725	0.000463444	LOC115703086/LOC115703087/LOC115703124/LOC115703160/LOC115715804/LOC115700291/LOC115705926/LOC115706389/LOC115707542/LOC115705354/LOC115709432/LOC115708998/LOC115709400/LOC115713924/LOC115714494/LOC115712667/LOC115714800/LOC115716128/LOC115715954/LOC115715697/LOC115716110/LOC115718438/LOC115724067/LOC115723394/LOC115695718/LOC115725642/LOC115697322/LOC115697244/LOC115697734/LOC115700904/LOC115700…	32
525	H3K56ac	GO:0000380	alternative mRNA splicing, via spliceosome	34/8108	41/15562	3.8e-05	0.000666873	0.000497899	LOC115696283/LOC115696009/LOC115703796/LOC115712402/LOC115706268/LOC115707685/LOC115705478/LOC115705553/LOC115705922/LOC115706160/LOC115706184/LOC115706600/LOC115705305/LOC115705238/LOC115710188/LOC115710249/LOC115710191/LOC115709457/LOC115713961/LOC115716841/LOC115716696/LOC115718181/LOC115716721/LOC115720794/LOC115719369/LOC115722691/LOC115725209/LOC115725126/LOC115725578/LOC115698290/LOC115697…	34
526	H3K56ac	GO:0043254	regulation of protein-containing complex assembly	42/8108	53/15562	3.95e-05	0.00068322	0.000510104	LOC115702674/LOC115702784/LOC115702799/LOC115704956/LOC115712375/LOC115712383/LOC115701199/LOC115705229/LOC115707553/LOC115706196/LOC115707206/LOC115707402/LOC115707539/LOC115707552/LOC115708916/LOC115709989/LOC115709883/LOC115711537/LOC115712632/LOC115713970/LOC115716110/LOC115719601/LOC115718997/LOC115718638/LOC115719076/LOC115720636/LOC115721065/LOC115722463/LOC115722179/LOC115722180/LOC115725…	42
527	H3K56ac	GO:0050684	regulation of mRNA processing	42/8108	53/15562	3.95e-05	0.00068322	0.000510104	LOC115702599/LOC115715318/LOC115696283/LOC115696009/LOC115712402/LOC115706268/LOC115705478/LOC115705553/LOC115705922/LOC115706160/LOC115706184/LOC115706600/LOC115705305/LOC115709390/LOC115710188/LOC115710249/LOC115709444/LOC115710191/LOC115709457/LOC115713797/LOC115713961/LOC115714428/LOC115716841/LOC115716696/LOC115718181/LOC115716272/LOC115716721/LOC115720794/LOC115719369/LOC115722691/LOC115725…	42
528	H3K56ac	GO:0042274	ribosomal small subunit biogenesis	60/8108	81/15562	4.07e-05	0.000697977	0.000521122	LOC115702948/LOC115705729/LOC115705135/LOC115708213/LOC115705197/LOC115707381/LOC115708260/LOC115705943/LOC115707151/LOC115707739/LOC115705252/LOC115708021/LOC115708027/LOC115709529/LOC115710297/LOC115709420/LOC115710311/LOC115714823/LOC115712976/LOC115713989/LOC115712948/LOC115714247/LOC115716821/LOC115716770/LOC115716650/LOC115716774/LOC115719737/LOC115720744/LOC115720655/LOC115719003/LOC115721…	60
529	H3K56ac	GO:0009062	fatty acid catabolic process	27/8108	31/15562	4.34e-05	0.000738256	0.000551195	LOC115723066/LOC115706299/LOC115708301/LOC115706516/LOC115706832/LOC115707261/LOC115707486/LOC115712181/LOC115712180/LOC115714493/LOC115714555/LOC115715988/LOC115717342/LOC115719179/LOC115720660/LOC115723785/LOC115722169/LOC115722296/LOC115723201/LOC115696900/LOC115698204/LOC115697235/LOC115699135/LOC115699150/LOC115699414/LOC115702146/LOC115702272	27
530	H3K56ac	GO:0045017	glycerolipid biosynthetic process	98/8108	143/15562	4.49e-05	0.000758504	0.000566313	LOC115703123/LOC115702611/LOC115708996/LOC115703150/LOC115703157/LOC115703234/LOC115709998/LOC115702965/LOC115708276/LOC115709308/LOC115709620/LOC115710352/LOC115710976/LOC115698229/LOC115705473/LOC115705441/LOC115705095/LOC115705879/LOC115705212/LOC115704840/LOC115705585/LOC115705608/LOC115705751/LOC115707523/LOC115706862/LOC115707043/LOC115707158/LOC115707180/LOC115707216/LOC115707333/LOC115707…	98
531	H3K56ac	GO:0031327	negative regulation of cellular biosynthetic process	171/8108	267/15562	4.66e-05	0.000776556	0.00057979	LOC115702592/LOC115704488/LOC115702736/LOC115702766/LOC115702813/LOC115703078/LOC115707433/LOC115695222/LOC115702759/LOC115702778/LOC115703071/LOC115703697/LOC115704745/LOC115706453/LOC115709095/LOC115710310/LOC115711315/LOC115711694/LOC115712195/LOC115714021/LOC115722563/LOC115697325/LOC115698748/LOC115699021/LOC115700469/LOC115700622/LOC115701871/LOC115702261/LOC115705510/LOC115704901/LOC115705…	171
532	H3K56ac	GO:0018022	peptidyl-lysine methylation	63/8108	86/15562	4.69e-05	0.000776556	0.00057979	LOC115702773/LOC115703121/LOC115707433/LOC115706453/LOC115708212/LOC115709107/LOC115714021/LOC115719082/LOC115697752/LOC115698826/LOC115699021/LOC115708140/LOC115707975/LOC115707487/LOC115705051/LOC115707890/LOC115705155/LOC115706829/LOC115711269/LOC115710710/LOC115709326/LOC115709959/LOC115715072/LOC115714503/LOC115712232/LOC115712237/LOC115712777/LOC115711959/LOC115712975/LOC115713887/LOC115717…	63
533	H3K56ac	GO:0046474	glycerophospholipid biosynthetic process	84/8108	120/15562	4.7e-05	0.000776556	0.00057979	LOC115702611/LOC115708996/LOC115703150/LOC115703157/LOC115709998/LOC115702965/LOC115708276/LOC115709308/LOC115709620/LOC115710352/LOC115710976/LOC115698229/LOC115705441/LOC115705095/LOC115705879/LOC115705585/LOC115705608/LOC115705751/LOC115707523/LOC115706862/LOC115707158/LOC115707180/LOC115707216/LOC115707333/LOC115707375/LOC115707928/LOC115708821/LOC115709641/LOC115708980/LOC115710643/LOC115709…	84
534	H3K56ac	GO:0006644	phospholipid metabolic process	147/8108	226/15562	5.03e-05	0.000823712	0.000614998	LOC115702611/LOC115702729/LOC115708996/LOC115702962/LOC115702971/LOC115703150/LOC115703157/LOC115709998/LOC115702965/LOC115708276/LOC115709308/LOC115709620/LOC115710352/LOC115710976/LOC115711722/LOC115698229/LOC115705473/LOC115705468/LOC115705504/LOC115705441/LOC115705095/LOC115705232/LOC115705879/LOC115705116/LOC115704661/LOC115705585/LOC115705608/LOC115705751/LOC115705753/LOC115708317/LOC115706…	147
535	H3K56ac	GO:0044087	regulation of cellular component biogenesis	71/8108	99/15562	5.12e-05	0.000828993	0.000618941	LOC115702674/LOC115702784/LOC115702799/LOC115722899/LOC115704956/LOC115712375/LOC115712383/LOC115713775/LOC115701199/LOC115705657/LOC115706612/LOC115705229/LOC115706119/LOC115707553/LOC115706196/LOC115707041/LOC115707206/LOC115707402/LOC115707539/LOC115707552/LOC115709600/LOC115708916/LOC115711529/LOC115709989/LOC115709883/LOC115711537/LOC115709678/LOC115712632/LOC115713970/LOC115712505/LOC115712…	71
536	H3K56ac	GO:0006890	retrograde vesicle-mediated transport, Golgi to endoplasmic reticulum	29/8108	34/15562	5.13e-05	0.000828993	0.000618941	LOC115702727/LOC115702737/LOC115702753/LOC115702754/LOC115710763/LOC115700972/LOC115706048/LOC115705393/LOC115704658/LOC115706419/LOC115705459/LOC115708132/LOC115707137/LOC115705248/LOC115709043/LOC115715922/LOC115718175/LOC115717582/LOC115715625/LOC115715575/LOC115716110/LOC115717285/LOC115723467/LOC115724067/LOC115723463/LOC115724490/LOC115697507/LOC115697013/LOC115698159	29
537	H3K56ac	GO:0009793	embryo development ending in seed dormancy	165/8108	257/15562	5.18e-05	0.000829946	0.000619652	LOC115702861/LOC115702918/LOC115703078/LOC115722899/LOC115723387/LOC115701640/LOC115703061/LOC115703727/LOC115706299/LOC115709817/LOC115710094/LOC115710161/LOC115710310/LOC115710594/LOC115713424/LOC115718911/LOC115724500/LOC115702350/LOC115706048/LOC115707648/LOC115704658/LOC115706606/LOC115706118/LOC115706732/LOC115705658/LOC115706082/LOC115706211/LOC115703573/LOC115705186/LOC115706355/LOC115705…	165
538	H3K56ac	GO:0006164	purine nucleotide biosynthetic process	69/8108	96/15562	5.8e-05	0.000907133	0.000677281	LOC115702850/LOC115724952/LOC115704957/LOC115705607/LOC115708073/LOC115709698/LOC115710101/LOC115710480/LOC115710919/LOC115712548/LOC115713640/LOC115702361/LOC115706092/LOC115707664/LOC115705417/LOC115708323/LOC115705183/LOC115708106/LOC115706093/LOC115707018/LOC115707115/LOC115707116/LOC115707550/LOC115707697/LOC115705347/LOC115707949/LOC115709744/LOC115709689/LOC115709134/LOC115709278/LOC115709…	69
539	H3K56ac	GO:0015865	purine nucleotide transport	43/8108	55/15562	5.82e-05	0.000907133	0.000677281	LOC115702633/LOC115706487/LOC115706814/LOC115706944/LOC115708785/LOC115709724/LOC115699977/LOC115704850/LOC115705663/LOC115705659/LOC115703574/LOC115705555/LOC115706563/LOC115705700/LOC115707036/LOC115707857/LOC115705272/LOC115711611/LOC115711222/LOC115710007/LOC115708782/LOC115715311/LOC115715086/LOC115712714/LOC115714238/LOC115712150/LOC115717228/LOC115716959/LOC115716787/LOC115716868/LOC115720…	43
540	H3K56ac	GO:0015868	purine ribonucleotide transport	43/8108	55/15562	5.82e-05	0.000907133	0.000677281	LOC115702633/LOC115706487/LOC115706814/LOC115706944/LOC115708785/LOC115709724/LOC115699977/LOC115704850/LOC115705663/LOC115705659/LOC115703574/LOC115705555/LOC115706563/LOC115705700/LOC115707036/LOC115707857/LOC115705272/LOC115711611/LOC115711222/LOC115710007/LOC115708782/LOC115715311/LOC115715086/LOC115712714/LOC115714238/LOC115712150/LOC115717228/LOC115716959/LOC115716787/LOC115716868/LOC115720…	43
541	H3K56ac	GO:0051503	adenine nucleotide transport	43/8108	55/15562	5.82e-05	0.000907133	0.000677281	LOC115702633/LOC115706487/LOC115706814/LOC115706944/LOC115708785/LOC115709724/LOC115699977/LOC115704850/LOC115705663/LOC115705659/LOC115703574/LOC115705555/LOC115706563/LOC115705700/LOC115707036/LOC115707857/LOC115705272/LOC115711611/LOC115711222/LOC115710007/LOC115708782/LOC115715311/LOC115715086/LOC115712714/LOC115714238/LOC115712150/LOC115717228/LOC115716959/LOC115716787/LOC115716868/LOC115720…	43
542	H3K56ac	GO:2000113	negative regulation of cellular macromolecule biosynthetic process	156/8108	242/15562	6.03e-05	0.000931507	0.00069548	LOC115702592/LOC115704488/LOC115702736/LOC115702813/LOC115703078/LOC115707433/LOC115702759/LOC115702778/LOC115703071/LOC115703697/LOC115704745/LOC115706453/LOC115709095/LOC115710310/LOC115711694/LOC115712195/LOC115714021/LOC115722563/LOC115697325/LOC115698748/LOC115699021/LOC115700469/LOC115700622/LOC115701871/LOC115702261/LOC115705510/LOC115704901/LOC115705128/LOC115706748/LOC115706726/LOC115705…	156
543	H3K56ac	GO:0000470	maturation of LSU-rRNA	33/8108	40/15562	6.1e-05	0.000931507	0.00069548	LOC115705361/LOC115704898/LOC115706295/LOC115705943/LOC115707020/LOC115708074/LOC115709788/LOC115709617/LOC115709415/LOC115711482/LOC115711500/LOC115713539/LOC115714649/LOC115712795/LOC115712376/LOC115716628/LOC115715636/LOC115720936/LOC115721169/LOC115722847/LOC115725375/LOC115725096/LOC115695721/LOC115725186/LOC115698115/LOC115697581/LOC115699639/LOC115700707/LOC115700905/LOC115700561/LOC115699…	33
544	H3K56ac	GO:0009668	plastid membrane organization	33/8108	40/15562	6.1e-05	0.000931507	0.00069548	LOC115713415/LOC115716371/LOC115702343/LOC115703620/LOC115697431/LOC115699901/LOC115702350/LOC115705189/LOC115705441/LOC115703578/LOC115707240/LOC115705722/LOC115706526/LOC115708039/LOC115708751/LOC115711256/LOC115711506/LOC115712478/LOC115713070/LOC115716726/LOC115719379/LOC115718490/LOC115720958/LOC115722804/LOC115723448/LOC115725636/LOC115724518/LOC115695660/LOC115695701/LOC115698215/LOC115701…	33
545	H3K56ac	GO:1903311	regulation of mRNA metabolic process	75/8108	106/15562	6.68e-05	0.00101333	0.000756566	LOC115702599/LOC115702736/LOC115715318/LOC115696283/LOC115696009/LOC115703071/LOC115704249/LOC115712402/LOC115706268/LOC115706748/LOC115705197/LOC115705478/LOC115705553/LOC115705922/LOC115706160/LOC115706184/LOC115706600/LOC115707364/LOC115705305/LOC115707916/LOC115709390/LOC115709250/LOC115710188/LOC115709629/LOC115710249/LOC115709444/LOC115710191/LOC115709457/LOC115709394/LOC115713797/LOC115713…	75
546	H3K56ac	GO:0006891	intra-Golgi vesicle-mediated transport	26/8108	30/15562	7.31e-05	0.00110048	0.000821638	LOC115710763/LOC115705393/LOC115705466/LOC115706980/LOC115708132/LOC115707542/LOC115705248/LOC115709920/LOC115709316/LOC115708935/LOC115715291/LOC115714571/LOC115716110/LOC115717285/LOC115724067/LOC115723394/LOC115722998/LOC115724941/LOC115724490/LOC115695863/LOC115697322/LOC115697507/LOC115698159/LOC115700842/LOC115699341/LOC115699667	26
547	H3K56ac	GO:0010558	negative regulation of macromolecule biosynthetic process	162/8108	253/15562	7.4e-05	0.00110705	0.000826543	LOC115702592/LOC115704488/LOC115702736/LOC115702766/LOC115702813/LOC115703078/LOC115707433/LOC115695222/LOC115702759/LOC115702778/LOC115703071/LOC115703697/LOC115704745/LOC115706453/LOC115709095/LOC115710310/LOC115711694/LOC115712195/LOC115714021/LOC115722563/LOC115697325/LOC115698748/LOC115699021/LOC115700469/LOC115700622/LOC115701871/LOC115702261/LOC115705510/LOC115704901/LOC115705128/LOC115706…	162
548	H3K56ac	GO:0016571	histone methylation	58/8108	79/15562	8.38e-05	0.00124512	0.000929627	LOC115703121/LOC115707433/LOC115706453/LOC115708212/LOC115709107/LOC115714021/LOC115719082/LOC115697752/LOC115698826/LOC115699021/LOC115707975/LOC115707487/LOC115705051/LOC115707890/LOC115705155/LOC115706212/LOC115706829/LOC115707534/LOC115711269/LOC115710710/LOC115715072/LOC115714503/LOC115712232/LOC115712237/LOC115711959/LOC115712975/LOC115713887/LOC115717183/LOC115716825/LOC115715925/LOC115716…	58
549	H3K56ac	GO:0009152	purine ribonucleotide biosynthetic process	66/8108	92/15562	9.18e-05	0.00135477	0.00101149	LOC115702850/LOC115724952/LOC115704957/LOC115705607/LOC115708073/LOC115709698/LOC115710101/LOC115710480/LOC115712548/LOC115713640/LOC115702361/LOC115706092/LOC115707664/LOC115705417/LOC115708323/LOC115705183/LOC115708106/LOC115706093/LOC115707018/LOC115707115/LOC115707116/LOC115707550/LOC115707697/LOC115705347/LOC115707949/LOC115709744/LOC115709689/LOC115709134/LOC115709278/LOC115709550/LOC115709…	66
550	H3K56ac	GO:0006606	protein import into nucleus	30/8108	36/15562	9.28e-05	0.00136054	0.0010158	LOC115702893/LOC115705296/LOC115712334/LOC115705580/LOC115705549/LOC115705463/LOC115705641/LOC115706275/LOC115707125/LOC115708733/LOC115709944/LOC115711319/LOC115712749/LOC115714817/LOC115712723/LOC115715174/LOC115717749/LOC115716396/LOC115721266/LOC115718982/LOC115718934/LOC115722167/LOC115722208/LOC115723308/LOC115725280/LOC115698272/LOC115699697/LOC115699468/LOC115699423/LOC115700543	30
551	H3K56ac	GO:0036503	ERAD pathway	38/8108	48/15562	9.66e-05	0.0014065	0.00105012	LOC115702951/LOC115714059/LOC115700360/LOC115701199/LOC115702317/LOC115707655/LOC115706276/LOC115706366/LOC115707195/LOC115707402/LOC115707782/LOC115709633/LOC115709618/LOC115709563/LOC115712237/LOC115715083/LOC115712804/LOC115714454/LOC115717050/LOC115719693/LOC115722633/LOC115723338/LOC115722554/LOC115725075/LOC115724943/LOC115725055/LOC115725486/LOC115725487/LOC115725634/LOC115724769/LOC115725…	38
552	H3K56ac	GO:0048024	regulation of mRNA splicing, via spliceosome	36/8108	45/15562	9.89e-05	0.0014065	0.00105012	LOC115715318/LOC115696283/LOC115696009/LOC115712402/LOC115706268/LOC115705478/LOC115705553/LOC115705922/LOC115706160/LOC115706184/LOC115706600/LOC115705305/LOC115710188/LOC115710249/LOC115710191/LOC115709457/LOC115713797/LOC115713961/LOC115714428/LOC115716841/LOC115716696/LOC115718181/LOC115716272/LOC115716721/LOC115720794/LOC115719369/LOC115722691/LOC115725209/LOC115725126/LOC115725578/LOC115724…	36
553	H3K56ac	GO:0072329	monocarboxylic acid catabolic process	36/8108	45/15562	9.89e-05	0.0014065	0.00105012	LOC115723066/LOC115706299/LOC115702331/LOC115708301/LOC115706516/LOC115706832/LOC115707261/LOC115707370/LOC115707486/LOC115709153/LOC115712181/LOC115712180/LOC115714493/LOC115714555/LOC115716615/LOC115715988/LOC115717342/LOC115716152/LOC115719179/LOC115720660/LOC115723785/LOC115722169/LOC115722296/LOC115723201/LOC115696900/LOC115698105/LOC115698204/LOC115697235/LOC115699135/LOC115699092/LOC115699…	36
554	H3K56ac	GO:0006354	DNA-templated transcription elongation	34/8108	42/15562	9.94e-05	0.0014065	0.00105012	LOC115708686/LOC115710634/LOC115705095/LOC115708273/LOC115708306/LOC115705998/LOC115706379/LOC115707024/LOC115707352/LOC115707373/LOC115707534/LOC115708814/LOC115714995/LOC115714210/LOC115712778/LOC115713009/LOC115718958/LOC115718408/LOC115721359/LOC115718626/LOC115718725/LOC115724098/LOC115722570/LOC115721763/LOC115723135/LOC115723078/LOC115724650/LOC115694713/LOC115725381/LOC115724961/LOC115697…	34
555	H3K56ac	GO:0009226	nucleotide-sugar biosynthetic process	23/8108	26/15562	9.97e-05	0.0014065	0.00105012	LOC115699192/LOC115698731/LOC115703832/LOC115704726/LOC115705080/LOC115706546/LOC115706811/LOC115707980/LOC115709730/LOC115709613/LOC115710002/LOC115709094/LOC115716491/LOC115716236/LOC115722501/LOC115722287/LOC115725344/LOC115697236/LOC115697279/LOC115697543/LOC115699693/LOC115699407/LOC115698732	23
556	H3K56ac	GO:1901259	chloroplast rRNA processing	23/8108	26/15562	9.97e-05	0.0014065	0.00105012	LOC115711190/LOC115714532/LOC115698624/LOC115699461/LOC115704693/LOC115704812/LOC115708072/LOC115709937/LOC115709797/LOC115710209/LOC115714026/LOC115714832/LOC115715723/LOC115717067/LOC115717753/LOC115716569/LOC115716440/LOC115716874/LOC115723113/LOC115694820/LOC115697477/LOC115699616/LOC115699553	23
557	H3K56ac	GO:0042255	ribosome assembly	59/8108	81/15562	0.000106297	0.00149017	0.00111259	LOC115708919/LOC115698624/LOC115705545/LOC115708213/LOC115705126/LOC115705011/LOC115705197/LOC115706595/LOC115703901/LOC115707381/LOC115708260/LOC115706414/LOC115707151/LOC115707838/LOC115705252/LOC115708021/LOC115708052/LOC115708074/LOC115709529/LOC115709213/LOC115709214/LOC115709215/LOC115710163/LOC115710241/LOC115710956/LOC115714719/LOC115714661/LOC115714247/LOC115716821/LOC115717245/LOC115719…	59
558	H3K56ac	GO:0046686	response to cadmium ion	105/8108	157/15562	0.000115033	0.00160255	0.00119649	LOC115702620/LOC115702629/LOC115702913/LOC115703190/LOC115707082/LOC115710185/LOC115710860/LOC115712334/LOC115713640/LOC115697690/LOC115698731/LOC115699010/LOC115699837/LOC115703671/LOC115704024/LOC115706732/LOC115705524/LOC115705230/LOC115705569/LOC115704770/LOC115705788/LOC115706148/LOC115707183/LOC115705312/LOC115705254/LOC115709556/LOC115709730/LOC115709279/LOC115709324/LOC115711668/LOC115710…	105
559	H3K56ac	GO:0006635	fatty acid beta-oxidation	25/8108	29/15562	0.000122499	0.00169596	0.00126624	LOC115723066/LOC115706299/LOC115708301/LOC115706832/LOC115707261/LOC115707486/LOC115712181/LOC115712180/LOC115714493/LOC115714555/LOC115715988/LOC115717342/LOC115719179/LOC115720660/LOC115723785/LOC115722169/LOC115723201/LOC115696900/LOC115698204/LOC115697235/LOC115699135/LOC115699150/LOC115699414/LOC115702146/LOC115702272	25
560	H3K56ac	GO:0015867	ATP transport	41/8108	53/15562	0.000133185	0.00182129	0.00135981	LOC115702633/LOC115706487/LOC115706814/LOC115706944/LOC115708785/LOC115709724/LOC115699977/LOC115704850/LOC115705663/LOC115705659/LOC115703574/LOC115705555/LOC115706563/LOC115705700/LOC115707036/LOC115707857/LOC115705272/LOC115711611/LOC115711222/LOC115710007/LOC115708782/LOC115715311/LOC115715086/LOC115712714/LOC115714238/LOC115712150/LOC115717228/LOC115716959/LOC115716787/LOC115716868/LOC115720…	41
561	H3K56ac	GO:0031146	SCF-dependent proteasomal ubiquitin-dependent protein catabolic process	41/8108	53/15562	0.000133185	0.00182129	0.00135981	LOC115721901/LOC115700096/LOC115703805/LOC115706219/LOC115711205/LOC115720532/LOC115721654/LOC115723577/LOC115725385/LOC115704034/LOC115708308/LOC115703747/LOC115704852/LOC115704948/LOC115705507/LOC115704102/LOC115706906/LOC115707886/LOC115708112/LOC115712497/LOC115712738/LOC115714112/LOC115712569/LOC115714373/LOC115717288/LOC115716081/LOC115716729/LOC115716603/LOC115717399/LOC115721176/LOC115723…	41
562	H3K56ac	GO:0006897	endocytosis	55/8108	75/15562	0.000134002	0.00182129	0.00135981	LOC115702864/LOC115705660/LOC115705575/LOC115711980/LOC115713617/LOC115720112/LOC115724246/LOC115697285/LOC115699818/LOC115705433/LOC115705029/LOC115707648/LOC115704658/LOC115706362/LOC115705215/LOC115705415/LOC115705502/LOC115705959/LOC115706166/LOC115707012/LOC115707520/LOC115712752/LOC115714494/LOC115713047/LOC115714084/LOC115714883/LOC115714393/LOC115712878/LOC115712884/LOC115716470/LOC115718…	55
563	H3K56ac	GO:0006368	transcription elongation by RNA polymerase II promoter	27/8108	32/15562	0.00013915	0.00187979	0.00140348	LOC115708686/LOC115710634/LOC115708273/LOC115708306/LOC115705998/LOC115706379/LOC115707352/LOC115707373/LOC115707534/LOC115708814/LOC115714995/LOC115714210/LOC115712778/LOC115713009/LOC115718958/LOC115718408/LOC115721359/LOC115718626/LOC115718725/LOC115722570/LOC115721763/LOC115723135/LOC115724650/LOC115697733/LOC115698749/LOC115701135/LOC115699581	27
564	H3K56ac	GO:0033044	regulation of chromosome organization	63/8108	88/15562	0.00014532	0.00195131	0.00145688	LOC115703082/LOC115703121/LOC115704038/LOC115697752/LOC115699147/LOC115706060/LOC115706726/LOC115707955/LOC115706082/LOC115707487/LOC115705214/LOC115705155/LOC115704754/LOC115704365/LOC115706898/LOC115707295/LOC115711362/LOC115708673/LOC115709098/LOC115709770/LOC115709746/LOC115709353/LOC115709581/LOC115714491/LOC115713293/LOC115712505/LOC115712648/LOC115712237/LOC115712826/LOC115712512/LOC115715…	63
565	H3K56ac	GO:0046903	secretion	53/8108	72/15562	0.000149974	0.00198983	0.00148564	LOC115702608/LOC115702674/LOC115703124/LOC115703160/LOC115702605/LOC115705833/LOC115709655/LOC115710763/LOC115698548/LOC115700150/LOC115700291/LOC115705534/LOC115704661/LOC115705400/LOC115705939/LOC115705926/LOC115707553/LOC115706389/LOC115707117/LOC115711282/LOC115710297/LOC115709365/LOC115713924/LOC115714571/LOC115714478/LOC115712600/LOC115716128/LOC115715729/LOC115717103/LOC115715665/LOC115721…	53
566	H3K56ac	GO:0051130	positive regulation of cellular component organization	53/8108	72/15562	0.000149974	0.00198983	0.00148564	LOC115702784/LOC115702799/LOC115699147/LOC115701199/LOC115706608/LOC115706681/LOC115706726/LOC115706082/LOC115705665/LOC115706196/LOC115706898/LOC115707206/LOC115707295/LOC115707402/LOC115707539/LOC115708916/LOC115709989/LOC115709353/LOC115709962/LOC115710014/LOC115712632/LOC115713970/LOC115712807/LOC115714012/LOC115712505/LOC115713887/LOC115716110/LOC115720767/LOC115719601/LOC115718997/LOC115718…	53
567	H3K56ac	GO:0000381	regulation of alternative mRNA splicing, via spliceosome	31/8108	38/15562	0.000155067	0.002033	0.00151787	LOC115696283/LOC115696009/LOC115712402/LOC115706268/LOC115705478/LOC115705553/LOC115705922/LOC115706160/LOC115706184/LOC115706600/LOC115705305/LOC115710188/LOC115710249/LOC115710191/LOC115709457/LOC115713961/LOC115716841/LOC115716696/LOC115718181/LOC115716721/LOC115720794/LOC115719369/LOC115722691/LOC115725209/LOC115725126/LOC115725578/LOC115698290/LOC115697708/LOC115697213/LOC115699226/LOC115699…	31
568	H3K56ac	GO:0010027	thylakoid membrane organization	31/8108	38/15562	0.000155067	0.002033	0.00151787	LOC115713415/LOC115716371/LOC115702343/LOC115703620/LOC115697431/LOC115699901/LOC115702350/LOC115705189/LOC115705441/LOC115703578/LOC115707240/LOC115705722/LOC115706526/LOC115708039/LOC115708751/LOC115711256/LOC115711506/LOC115712478/LOC115713070/LOC115716726/LOC115719379/LOC115718490/LOC115720958/LOC115722804/LOC115723448/LOC115725636/LOC115695660/LOC115695701/LOC115701318/LOC115701414/LOC115701…	31
569	H3K56ac	GO:0009161	ribonucleoside monophosphate metabolic process	33/8108	41/15562	0.000155963	0.002033	0.00151787	LOC115708073/LOC115710919/LOC115712548/LOC115713640/LOC115706092/LOC115705417/LOC115707550/LOC115709556/LOC115709792/LOC115709677/LOC115709550/LOC115709549/LOC115712679/LOC115714115/LOC115712684/LOC115716946/LOC115716800/LOC115717339/LOC115716107/LOC115718174/LOC115719673/LOC115722392/LOC115722830/LOC115725389/LOC115697110/LOC115697031/LOC115698078/LOC115697679/LOC115699490/LOC115699510/LOC115701…	33
570	H3K56ac	GO:0044270	cellular nitrogen compound catabolic process	139/8108	216/15562	0.000166546	0.00215832	0.00161144	LOC115702736/LOC115702795/LOC115702867/LOC115702924/LOC115702968/LOC115703193/LOC115703195/LOC115696485/LOC115703071/LOC115703104/LOC115703796/LOC115704249/LOC115709368/LOC115697431/LOC115695344/LOC115705519/LOC115705686/LOC115705119/LOC115706264/LOC115706748/LOC115708325/LOC115705197/LOC115706139/LOC115708273/LOC115705873/LOC115708306/LOC115705397/LOC115705497/LOC115705625/LOC115705699/LOC115705…	139
571	H3K56ac	GO:0006650	glycerophospholipid metabolic process	103/8108	155/15562	0.000193767	0.00249657	0.00186398	LOC115702611/LOC115702729/LOC115708996/LOC115702962/LOC115702971/LOC115703150/LOC115703157/LOC115709998/LOC115702965/LOC115708276/LOC115709308/LOC115709620/LOC115710352/LOC115710976/LOC115698229/LOC115705473/LOC115705441/LOC115705095/LOC115705879/LOC115705585/LOC115705608/LOC115705751/LOC115708317/LOC115706104/LOC115707523/LOC115706862/LOC115707158/LOC115707180/LOC115707216/LOC115707333/LOC115707…	103
572	H3K56ac	GO:0030150	protein import into mitochondrial matrix	24/8108	28/15562	0.000204376	0.00261812	0.00195474	LOC115702879/LOC115702892/LOC115708514/LOC115713121/LOC115705543/LOC115708161/LOC115706827/LOC115707514/LOC115711532/LOC115711406/LOC115710058/LOC115712002/LOC115712702/LOC115714264/LOC115719112/LOC115721380/LOC115722280/LOC115722732/LOC115721800/LOC115722613/LOC115694747/LOC115725737/LOC115725191/LOC115699739	24
573	H3K56ac	GO:0009959	negative gravitropism	13/8108	13/15562	0.000207504	0.00262799	0.0019621	LOC115705609/LOC115708198/LOC115706166/LOC115709154/LOC115710239/LOC115713058/LOC115716467/LOC115718746/LOC115721157/LOC115724200/LOC115723448/LOC115697722/LOC115698084	13
574	H3K56ac	GO:0048199	vesicle targeting, to, from or within Golgi	13/8108	13/15562	0.000207504	0.00262799	0.0019621	LOC115704956/LOC115707648/LOC115704658/LOC115708096/LOC115707687/LOC115707553/LOC115707910/LOC115716193/LOC115716017/LOC115720636/LOC115722179/LOC115722180/LOC115698946	13
575	H3K56ac	GO:0016054	organic acid catabolic process	85/8108	125/15562	0.000212718	0.00266376	0.00198881	LOC115702935/LOC115702968/LOC115713573/LOC115723066/LOC115704012/LOC115706299/LOC115707082/LOC115708896/LOC115699010/LOC115702331/LOC115706279/LOC115706202/LOC115705119/LOC115708301/LOC115708195/LOC115705496/LOC115706405/LOC115706516/LOC115706832/LOC115707183/LOC115707261/LOC115707370/LOC115707486/LOC115707738/LOC115709862/LOC115709383/LOC115710211/LOC115709153/LOC115712181/LOC115712180/LOC115712…	85
576	H3K56ac	GO:0046395	carboxylic acid catabolic process	85/8108	125/15562	0.000212718	0.00266376	0.00198881	LOC115702935/LOC115702968/LOC115713573/LOC115723066/LOC115704012/LOC115706299/LOC115707082/LOC115708896/LOC115699010/LOC115702331/LOC115706279/LOC115706202/LOC115705119/LOC115708301/LOC115708195/LOC115705496/LOC115706405/LOC115706516/LOC115706832/LOC115707183/LOC115707261/LOC115707370/LOC115707486/LOC115707738/LOC115709862/LOC115709383/LOC115710211/LOC115709153/LOC115712181/LOC115712180/LOC115712…	85
577	H3K56ac	GO:0006367	transcription initiation at RNA polymerase II promoter	38/8108	49/15562	0.000213981	0.0026646	0.00198944	LOC115702736/LOC115703047/LOC115710578/LOC115701199/LOC115708179/LOC115707202/LOC115705576/LOC115706196/LOC115708197/LOC115707069/LOC115707206/LOC115707352/LOC115707373/LOC115707402/LOC115707539/LOC115709767/LOC115709819/LOC115709742/LOC115709913/LOC115715157/LOC115711981/LOC115714412/LOC115716897/LOC115717035/LOC115716110/LOC115717337/LOC115720806/LOC115719601/LOC115718408/LOC115718997/LOC115719…	38
578	H3K56ac	GO:0006084	acetyl-CoA metabolic process	19/8108	21/15562	0.000222108	0.00275044	0.00205353	LOC115711722/LOC115708323/LOC115705116/LOC115705496/LOC115705753/LOC115706093/LOC115707018/LOC115707697/LOC115712627/LOC115716624/LOC115716237/LOC115719471/LOC115722255/LOC115696871/LOC115699172/LOC115698761/LOC115699491/LOC115701225/LOC115702228	19
579	H3K56ac	GO:0040029	epigenetic regulation of gene expression	95/8108	142/15562	0.00023407	0.00288256	0.00215217	LOC115702592/LOC115703251/LOC115707433/LOC115702759/LOC115702778/LOC115704038/LOC115704391/LOC115706453/LOC115709095/LOC115711694/LOC115697325/LOC115697752/LOC115699021/LOC115702261/LOC115705161/LOC115703950/LOC115705095/LOC115705051/LOC115705449/LOC115705214/LOC115707890/LOC115705637/LOC115706114/LOC115706160/LOC115706471/LOC115706711/LOC115709205/LOC115709204/LOC115709206/LOC115710180/LOC115708…	95
580	H3K56ac	GO:0006403	RNA localization	55/8108	76/15562	0.000239711	0.00291369	0.00217541	LOC115702808/LOC115703071/LOC115703796/LOC115705296/LOC115707318/LOC115712334/LOC115712441/LOC115705580/LOC115705095/LOC115705463/LOC115705449/LOC115708273/LOC115708306/LOC115707096/LOC115707125/LOC115707903/LOC115708074/LOC115709632/LOC115709152/LOC115712749/LOC115715219/LOC115714995/LOC115714210/LOC115714817/LOC115711981/LOC115714570/LOC115712795/LOC115712376/LOC115715174/LOC115717214/LOC115717…	55
581	H3K56ac	GO:0006760	folic acid-containing compound metabolic process	28/8108	34/15562	0.00024052	0.00291369	0.00217541	LOC115703195/LOC115725500/LOC115710463/LOC115710665/LOC115697820/LOC115699010/LOC115700173/LOC115701123/LOC115706851/LOC115706452/LOC115705775/LOC115706545/LOC115709184/LOC115708773/LOC115709377/LOC115709681/LOC115712098/LOC115712609/LOC115717445/LOC115719426/LOC115722401/LOC115695931/LOC115694685/LOC115695181/LOC115698128/LOC115697435/LOC115701524/LOC115701019	28
582	H3K56ac	GO:0045324	late endosome to vacuole transport	28/8108	34/15562	0.00024052	0.00291369	0.00217541	LOC115714437/LOC115713700/LOC115707485/LOC115707165/LOC115705534/LOC115705862/LOC115705150/LOC115705223/LOC115706098/LOC115707170/LOC115706458/LOC115706355/LOC115705957/LOC115706166/LOC115706883/LOC115707615/LOC115709281/LOC115715190/LOC115712887/LOC115717008/LOC115715686/LOC115718552/LOC115719462/LOC115718452/LOC115725139/LOC115697080/LOC115701191/LOC115700555	28
583	H3K56ac	GO:0006862	nucleotide transport	43/8108	57/15562	0.000251283	0.00302762	0.00226047	LOC115702633/LOC115706487/LOC115706814/LOC115706944/LOC115708785/LOC115709724/LOC115699977/LOC115704850/LOC115705663/LOC115705659/LOC115703574/LOC115705555/LOC115706563/LOC115705700/LOC115707036/LOC115707857/LOC115705272/LOC115711611/LOC115711222/LOC115710007/LOC115708782/LOC115715311/LOC115715086/LOC115712714/LOC115714238/LOC115712150/LOC115717228/LOC115716959/LOC115716787/LOC115716868/LOC115720…	43
584	H3K56ac	GO:0010256	endomembrane system organization	66/8108	94/15562	0.000257819	0.00308967	0.0023068	LOC115705660/LOC115704030/LOC115709591/LOC115714343/LOC115697109/LOC115697487/LOC115697495/LOC115706048/LOC115706611/LOC115705207/LOC115705466/LOC115704904/LOC115706980/LOC115705862/LOC115705777/LOC115708236/LOC115705957/LOC115706166/LOC115706621/LOC115706947/LOC115707137/LOC115707180/LOC115707408/LOC115707542/LOC115711242/LOC115709281/LOC115709316/LOC115709432/LOC115710116/LOC115715190/LOC115712…	66
585	H3K56ac	GO:0034968	histone lysine methylation	53/8108	73/15562	0.000270774	0.00322757	0.00240976	LOC115703121/LOC115707433/LOC115706453/LOC115708212/LOC115709107/LOC115714021/LOC115719082/LOC115697752/LOC115698826/LOC115699021/LOC115707975/LOC115707487/LOC115705051/LOC115707890/LOC115705155/LOC115706829/LOC115711269/LOC115710710/LOC115715072/LOC115714503/LOC115712232/LOC115712237/LOC115711959/LOC115712975/LOC115713887/LOC115717183/LOC115716825/LOC115715925/LOC115716228/LOC115720831/LOC115719…	53
586	H3K56ac	GO:0072522	purine-containing compound biosynthetic process	72/8108	104/15562	0.000274559	0.00325528	0.00243045	LOC115702850/LOC115724952/LOC115704957/LOC115705607/LOC115708073/LOC115709698/LOC115710101/LOC115710480/LOC115710919/LOC115712548/LOC115713640/LOC115698624/LOC115702361/LOC115702364/LOC115706092/LOC115707664/LOC115705417/LOC115708323/LOC115705183/LOC115708106/LOC115706093/LOC115707018/LOC115707115/LOC115707116/LOC115707550/LOC115707697/LOC115705347/LOC115707949/LOC115709744/LOC115709689/LOC115709…	72
587	H3K56ac	GO:0033043	regulation of organelle organization	125/8108	194/15562	0.000320611	0.00378117	0.00282309	LOC115702674/LOC115702784/LOC115702799/LOC115703082/LOC115703121/LOC115704956/LOC115703596/LOC115704038/LOC115704802/LOC115712375/LOC115712383/LOC115697752/LOC115699147/LOC115706608/LOC115706060/LOC115705653/LOC115706681/LOC115706726/LOC115707955/LOC115706082/LOC115707487/LOC115705214/LOC115705155/LOC115704754/LOC115704365/LOC115705229/LOC115705665/LOC115707553/LOC115706898/LOC115707041/LOC115707…	125
588	H3K56ac	GO:0009100	glycoprotein metabolic process	108/8108	165/15562	0.000333233	0.00390935	0.00291879	LOC115702863/LOC115702925/LOC115702932/LOC115695222/LOC115709068/LOC115709580/LOC115710680/LOC115710905/LOC115711627/LOC115698949/LOC115702356/LOC115708063/LOC115708108/LOC115707760/LOC115706556/LOC115707581/LOC115705509/LOC115704087/LOC115704435/LOC115705024/LOC115706546/LOC115707203/LOC115707301/LOC115707814/LOC115709203/LOC115709178/LOC115709180/LOC115711612/LOC115709633/LOC115709907/LOC115709…	108
589	H3K56ac	GO:0001732	formation of cytoplasmic translation initiation complex	23/8108	27/15562	0.000339215	0.00395869	0.00295563	LOC115707610/LOC115697809/LOC115706118/LOC115707422/LOC115707065/LOC115706521/LOC115708045/LOC115710090/LOC115710091/LOC115713052/LOC115715969/LOC115719292/LOC115722800/LOC115722050/LOC115722294/LOC115722858/LOC115725468/LOC115698278/LOC115697001/LOC115700890/LOC115699547/LOC115701428/LOC115699269	23
590	H3K56ac	GO:0000209	protein polyubiquitination	49/8108	67/15562	0.000343675	0.00398986	0.0029789	LOC115703165/LOC115697677/LOC115699147/LOC115700278/LOC115706060/LOC115705855/LOC115707955/LOC115705996/LOC115706472/LOC115706898/LOC115707195/LOC115707352/LOC115711419/LOC115711412/LOC115709645/LOC115709310/LOC115714365/LOC115712217/LOC115712237/LOC115714462/LOC115714461/LOC115714654/LOC115715137/LOC115716057/LOC115717295/LOC115717293/LOC115717294/LOC115717036/LOC115717426/LOC115716951/LOC115715…	49
591	H3K56ac	GO:0006913	nucleocytoplasmic transport	68/8108	98/15562	0.00036258	0.00416594	0.00311036	LOC115702808/LOC115702893/LOC115705296/LOC115707318/LOC115712334/LOC115705160/LOC115705157/LOC115705580/LOC115705549/LOC115705095/LOC115705463/LOC115708273/LOC115708306/LOC115705641/LOC115706275/LOC115707096/LOC115707125/LOC115707903/LOC115708074/LOC115709632/LOC115708733/LOC115709944/LOC115711319/LOC115708879/LOC115709152/LOC115712749/LOC115715219/LOC115714995/LOC115714210/LOC115714817/LOC115712…	68
592	H3K56ac	GO:0051169	nuclear transport	68/8108	98/15562	0.00036258	0.00416594	0.00311036	LOC115702808/LOC115702893/LOC115705296/LOC115707318/LOC115712334/LOC115705160/LOC115705157/LOC115705580/LOC115705549/LOC115705095/LOC115705463/LOC115708273/LOC115708306/LOC115705641/LOC115706275/LOC115707096/LOC115707125/LOC115707903/LOC115708074/LOC115709632/LOC115708733/LOC115709944/LOC115711319/LOC115708879/LOC115709152/LOC115712749/LOC115715219/LOC115714995/LOC115714210/LOC115714817/LOC115712…	68
593	H3K56ac	GO:0006470	protein dephosphorylation	169/8108	271/15562	0.000377668	0.00429985	0.00321034	LOC115702729/LOC115702862/LOC115702900/LOC115702962/LOC115702971/LOC115703022/LOC115703037/LOC115715861/LOC115719402/LOC115720050/LOC115705210/LOC115705630/LOC115705899/LOC115706627/LOC115707309/LOC115707545/LOC115714343/LOC115714587/LOC115724355/LOC115698652/LOC115699088/LOC115699256/LOC115699417/LOC115699509/LOC115700534/LOC115702317/LOC115706248/LOC115705123/LOC115707608/LOC115706408/LOC115707…	169
594	H3K56ac	GO:0009156	ribonucleoside monophosphate biosynthetic process	31/8108	39/15562	0.000378094	0.00429985	0.00321034	LOC115708073/LOC115710919/LOC115712548/LOC115713640/LOC115706092/LOC115705417/LOC115707550/LOC115709556/LOC115709792/LOC115709550/LOC115709549/LOC115712679/LOC115714115/LOC115712684/LOC115716946/LOC115716800/LOC115717339/LOC115716107/LOC115718174/LOC115719673/LOC115722392/LOC115725389/LOC115697110/LOC115697031/LOC115698078/LOC115697679/LOC115699490/LOC115699510/LOC115701504/LOC115699666/LOC115699…	31
595	H3K56ac	GO:0007623	circadian rhythm	52/8108	72/15562	0.000382248	0.00430143	0.00321152	LOC115702661/LOC115702815/LOC115702819/LOC115723387/LOC115695269/LOC115704391/LOC115708742/LOC115713640/LOC115697696/LOC115707608/LOC115706039/LOC115705128/LOC115705217/LOC115707308/LOC115707722/LOC115707127/LOC115707394/LOC115711550/LOC115711591/LOC115714162/LOC115712704/LOC115713414/LOC115712707/LOC115712119/LOC115714981/LOC115712353/LOC115714103/LOC115716864/LOC115717645/LOC115719246/LOC115720…	52
596	H3K56ac	GO:0048316	seed development	280/8108	468/15562	0.000385152	0.00430143	0.00321152	LOC115702667/LOC115702724/LOC115702725/LOC115702808/LOC115702861/LOC115702918/LOC115703013/LOC115703078/LOC115722899/LOC115705744/LOC115723387/LOC115701640/LOC115703061/LOC115703727/LOC115704704/LOC115706299/LOC115706453/LOC115709176/LOC115709512/LOC115709817/LOC115710094/LOC115710161/LOC115710310/LOC115710594/LOC115711270/LOC115713424/LOC115718911/LOC115719232/LOC115722563/LOC115724500/LOC115697…	280
597	H3K56ac	GO:0009225	nucleotide-sugar metabolic process	29/8108	36/15562	0.00038589	0.00430143	0.00321152	LOC115699192/LOC115698731/LOC115703832/LOC115704726/LOC115705080/LOC115706546/LOC115706811/LOC115707980/LOC115710354/LOC115709730/LOC115709613/LOC115710002/LOC115709094/LOC115716491/LOC115716138/LOC115716236/LOC115721312/LOC115719055/LOC115722501/LOC115722287/LOC115725344/LOC115725486/LOC115697236/LOC115697279/LOC115697543/LOC115700474/LOC115699693/LOC115699407/LOC115698732	29
598	H3K56ac	GO:0009069	serine family amino acid metabolic process	47/8108	64/15562	0.000385951	0.00430143	0.00321152	LOC115702620/LOC115702618/LOC115702629/LOC115702972/LOC115703006/LOC115703195/LOC115713573/LOC115715228/LOC115707082/LOC115711146/LOC115699010/LOC115706332/LOC115705658/LOC115706566/LOC115705662/LOC115703573/LOC115707895/LOC115707738/LOC115707749/LOC115708041/LOC115709268/LOC115710211/LOC115712615/LOC115712011/LOC115712098/LOC115715268/LOC115714998/LOC115716122/LOC115721145/LOC115719520/LOC115719…	47
599	H3K56ac	GO:0006304	DNA modification	40/8108	53/15562	0.000405611	0.00449805	0.00335832	LOC115725500/LOC115702987/LOC115710463/LOC115697752/LOC115699010/LOC115700865/LOC115703950/LOC115706114/LOC115705294/LOC115708999/LOC115709402/LOC115713936/LOC115712505/LOC115712625/LOC115711981/LOC115712154/LOC115714399/LOC115714447/LOC115715026/LOC115712558/LOC115717183/LOC115717005/LOC115719474/LOC115719230/LOC115720751/LOC115719674/LOC115721391/LOC115721344/LOC115724100/LOC115723771/LOC115724…	40
600	H3K56ac	GO:0000038	very long-chain fatty acid metabolic process	15/8108	16/15562	0.000460686	0.00503367	0.00375823	LOC115700382/LOC115706628/LOC115708003/LOC115712551/LOC115712929/LOC115714440/LOC115715988/LOC115716778/LOC115720575/LOC115719383/LOC115722414/LOC115722469/LOC115724429/LOC115697502/LOC115699743	15
601	H3K56ac	GO:0051568	histone H3-K4 methylation	15/8108	16/15562	0.000460686	0.00503367	0.00375823	LOC115714021/LOC115698826/LOC115707487/LOC115705051/LOC115707890/LOC115711269/LOC115712232/LOC115712237/LOC115711959/LOC115713887/LOC115719711/LOC115722176/LOC115723135/LOC115698659/LOC115699063	15
602	H3K56ac	GO:0090114	COPII-coated vesicle budding	15/8108	16/15562	0.000460686	0.00503367	0.00375823	LOC115704956/LOC115713633/LOC115713350/LOC115707553/LOC115707025/LOC115711242/LOC115716017/LOC115719464/LOC115720636/LOC115724109/LOC115722179/LOC115722180/LOC115722805/LOC115700553/LOC115698946	15
603	H3K56ac	GO:0046486	glycerolipid metabolic process	119/8108	185/15562	0.000486121	0.00528567	0.00394638	LOC115703123/LOC115702611/LOC115702729/LOC115708996/LOC115702962/LOC115702971/LOC115703150/LOC115703157/LOC115703234/LOC115709998/LOC115702965/LOC115704378/LOC115708276/LOC115709308/LOC115709620/LOC115710352/LOC115710976/LOC115698229/LOC115705473/LOC115705441/LOC115705095/LOC115705879/LOC115705212/LOC115704840/LOC115705585/LOC115705608/LOC115705751/LOC115708317/LOC115706104/LOC115707523/LOC115706…	119
604	H3K56ac	GO:0051123	RNA polymerase II preinitiation complex assembly	20/8108	23/15562	0.000491408	0.00531722	0.00396993	LOC115701199/LOC115707202/LOC115706196/LOC115707069/LOC115707206/LOC115707402/LOC115707539/LOC115709767/LOC115709742/LOC115709913/LOC115714412/LOC115717035/LOC115716110/LOC115720806/LOC115719601/LOC115718997/LOC115719076/LOC115722931/LOC115724516/LOC115725232	20
605	H3K56ac	GO:0090174	organelle membrane fusion	34/8108	44/15562	0.000520242	0.00560202	0.00418257	LOC115704030/LOC115708838/LOC115699031/LOC115708180/LOC115707485/LOC115708096/LOC115707687/LOC115706947/LOC115707137/LOC115707542/LOC115707910/LOC115714478/LOC115717582/LOC115716668/LOC115716424/LOC115715593/LOC115716110/LOC115719647/LOC115722428/LOC115724067/LOC115723463/LOC115722780/LOC115723394/LOC115723213/LOC115725765/LOC115699700/LOC115700842/LOC115698832/LOC115701240/LOC115699099/LOC115701…	34
606	H3K56ac	GO:0071478	cellular response to radiation	59/8108	84/15562	0.000530671	0.00568685	0.0042459	LOC115702815/LOC115702819/LOC115703137/LOC115703002/LOC115703001/LOC115703234/LOC115695661/LOC115695269/LOC115695743/LOC115710101/LOC115699248/LOC115700135/LOC115701871/LOC115706248/LOC115705128/LOC115705617/LOC115707394/LOC115707411/LOC115709600/LOC115708655/LOC115709363/LOC115710267/LOC115711301/LOC115709678/LOC115714294/LOC115714721/LOC115712237/LOC115712410/LOC115714088/LOC115712353/LOC115716…	59
607	H3K56ac	GO:0046700	heterocycle catabolic process	139/8108	220/15562	0.000545035	0.00581284	0.00433997	LOC115702736/LOC115702795/LOC115702924/LOC115702968/LOC115703193/LOC115703195/LOC115696485/LOC115703071/LOC115703104/LOC115703796/LOC115704249/LOC115709368/LOC115697431/LOC115695344/LOC115705519/LOC115705686/LOC115705119/LOC115706264/LOC115706748/LOC115708325/LOC115705197/LOC115706139/LOC115708273/LOC115705873/LOC115708306/LOC115705397/LOC115705497/LOC115705625/LOC115705699/LOC115705760/LOC115705…	139
608	H3K56ac	GO:0035335	peptidyl-tyrosine dephosphorylation	32/8108	41/15562	0.000554768	0.0058868	0.00439519	LOC115702729/LOC115702962/LOC115702971/LOC115715861/LOC115705210/LOC115714343/LOC115699417/LOC115707983/LOC115706028/LOC115705671/LOC115706104/LOC115707395/LOC115711572/LOC115712835/LOC115712711/LOC115712929/LOC115713921/LOC115715580/LOC115716474/LOC115719429/LOC115719075/LOC115721353/LOC115721155/LOC115721832/LOC115696936/LOC115699615/LOC115701326/LOC115699518/LOC115699140/LOC115702282/LOC115702…	32
609	H3K56ac	GO:0006613	cotranslational protein targeting to membrane	22/8108	26/15562	0.000559893	0.0058868	0.00439519	LOC115702343/LOC115711387/LOC115708339/LOC115708225/LOC115704770/LOC115706557/LOC115707868/LOC115708714/LOC115709966/LOC115712636/LOC115711921/LOC115714092/LOC115716045/LOC115721177/LOC115719708/LOC115724624/LOC115724604/LOC115725636/LOC115695944/LOC115696973/LOC115698021/LOC115699246	22
610	H3K56ac	GO:0006614	SRP-dependent cotranslational protein targeting to membrane	22/8108	26/15562	0.000559893	0.0058868	0.00439519	LOC115702343/LOC115711387/LOC115708339/LOC115708225/LOC115704770/LOC115706557/LOC115707868/LOC115708714/LOC115709966/LOC115712636/LOC115711921/LOC115714092/LOC115716045/LOC115721177/LOC115719708/LOC115724624/LOC115724604/LOC115725636/LOC115695944/LOC115696973/LOC115698021/LOC115699246	22
611	H3K56ac	GO:0090351	seedling development	77/8108	114/15562	0.000568983	0.00595429	0.00444558	LOC115702724/LOC115702725/LOC115703013/LOC115703251/LOC115717286/LOC115695464/LOC115709176/LOC115712548/LOC115713788/LOC115700855/LOC115702329/LOC115705217/LOC115706211/LOC115704840/LOC115706355/LOC115706893/LOC115707340/LOC115707473/LOC115705254/LOC115707891/LOC115710181/LOC115709676/LOC115709363/LOC115710197/LOC115711545/LOC115711506/LOC115708807/LOC115709681/LOC115709323/LOC115709330/LOC115712…	77
612	H3K56ac	GO:0006900	vesicle budding from membrane	30/8108	38/15562	0.000583671	0.00605118	0.00451791	LOC115704956/LOC115713633/LOC115714437/LOC115713350/LOC115714343/LOC115720112/LOC115705862/LOC115706098/LOC115705957/LOC115707553/LOC115707025/LOC115711242/LOC115709281/LOC115712752/LOC115712711/LOC115714800/LOC115714883/LOC115716193/LOC115716017/LOC115719464/LOC115720636/LOC115724109/LOC115722179/LOC115722180/LOC115722805/LOC115722184/LOC115724839/LOC115700553/LOC115698946/LOC115698993	30
613	H3K56ac	GO:0070988	demethylation	30/8108	38/15562	0.000583671	0.00605118	0.00451791	LOC115702987/LOC115703104/LOC115707682/LOC115708259/LOC115707672/LOC115707704/LOC115705294/LOC115708673/LOC115713936/LOC115712160/LOC115714399/LOC115712917/LOC115715026/LOC115714179/LOC115715810/LOC115719474/LOC115720962/LOC115719166/LOC115719230/LOC115720752/LOC115719674/LOC115721391/LOC115721095/LOC115723771/LOC115725266/LOC115695773/LOC115697333/LOC115697728/LOC115697442/LOC115699701	30
614	H3K56ac	GO:0031334	positive regulation of protein-containing complex assembly	24/8108	29/15562	0.000597384	0.00616467	0.00460265	LOC115702784/LOC115702799/LOC115701199/LOC115706196/LOC115707206/LOC115707402/LOC115707539/LOC115708916/LOC115709989/LOC115712632/LOC115713970/LOC115716110/LOC115719601/LOC115718997/LOC115718638/LOC115719076/LOC115721065/LOC115722463/LOC115725691/LOC115694845/LOC115725232/LOC115700472/LOC115701310/LOC115701459	24
615	H3K56ac	GO:0000460	maturation of 5.8S rRNA	28/8108	35/15562	0.000603511	0.00619919	0.00462843	LOC115703071/LOC115699576/LOC115708074/LOC115711500/LOC115713075/LOC115713019/LOC115714649/LOC115714026/LOC115715636/LOC115717042/LOC115719110/LOC115721169/LOC115722268/LOC115695946/LOC115725582/LOC115725186/LOC115694746/LOC115697840/LOC115698115/LOC115700707/LOC115700561/LOC115699110/LOC115701141/LOC115699074/LOC115700462/LOC115699561/LOC115700468/LOC115700470	28
616	H3K56ac	GO:0070925	organelle assembly	104/8108	160/15562	0.000620075	0.00634013	0.00473365	LOC115702907/LOC115702917/LOC115703042/LOC115708919/LOC115709368/LOC115714343/LOC115698624/LOC115699845/LOC115705545/LOC115708213/LOC115705126/LOC115705011/LOC115705197/LOC115706595/LOC115703901/LOC115707381/LOC115708260/LOC115706458/LOC115706414/LOC115706522/LOC115707041/LOC115707151/LOC115707408/LOC115707838/LOC115707830/LOC115705259/LOC115705252/LOC115708021/LOC115708052/LOC115708074/LOC115709…	104
617	H3K56ac	GO:0009101	glycoprotein biosynthetic process	101/8108	155/15562	0.000648168	0.0065971	0.00492551	LOC115702863/LOC115702925/LOC115702932/LOC115695222/LOC115709068/LOC115709580/LOC115710680/LOC115710905/LOC115711627/LOC115698949/LOC115702356/LOC115708108/LOC115707760/LOC115706556/LOC115707581/LOC115705509/LOC115704087/LOC115704435/LOC115705024/LOC115706546/LOC115707203/LOC115707301/LOC115707814/LOC115709203/LOC115711612/LOC115709633/LOC115709907/LOC115709325/LOC115710059/LOC115709992/LOC115711…	101
618	H3K56ac	GO:0018208	peptidyl-proline modification	72/8108	106/15562	0.00066158	0.00670301	0.00500458	LOC115703054/LOC115715228/LOC115717462/LOC115699935/LOC115703922/LOC115704427/LOC115704638/LOC115706704/LOC115709351/LOC115709861/LOC115709878/LOC115712510/LOC115698652/LOC115707449/LOC115706040/LOC115705383/LOC115705206/LOC115706339/LOC115706367/LOC115706366/LOC115708727/LOC115709326/LOC115709457/LOC115708714/LOC115711396/LOC115711510/LOC115714767/LOC115714601/LOC115714253/LOC115714308/LOC115712…	72
619	H3K56ac	GO:0050657	nucleic acid transport	47/8108	65/15562	0.000691726	0.00691416	0.00516224	LOC115702808/LOC115705296/LOC115707318/LOC115712334/LOC115712441/LOC115705580/LOC115705095/LOC115705463/LOC115705449/LOC115708273/LOC115708306/LOC115707096/LOC115707125/LOC115707903/LOC115708074/LOC115709632/LOC115709152/LOC115712749/LOC115715219/LOC115714995/LOC115714210/LOC115714817/LOC115711981/LOC115714570/LOC115715174/LOC115717214/LOC115717749/LOC115716396/LOC115715599/LOC115719635/LOC115720…	47
620	H3K56ac	GO:0050658	RNA transport	47/8108	65/15562	0.000691726	0.00691416	0.00516224	LOC115702808/LOC115705296/LOC115707318/LOC115712334/LOC115712441/LOC115705580/LOC115705095/LOC115705463/LOC115705449/LOC115708273/LOC115708306/LOC115707096/LOC115707125/LOC115707903/LOC115708074/LOC115709632/LOC115709152/LOC115712749/LOC115715219/LOC115714995/LOC115714210/LOC115714817/LOC115711981/LOC115714570/LOC115715174/LOC115717214/LOC115717749/LOC115716396/LOC115715599/LOC115719635/LOC115720…	47
621	H3K56ac	GO:0051236	establishment of RNA localization	47/8108	65/15562	0.000691726	0.00691416	0.00516224	LOC115702808/LOC115705296/LOC115707318/LOC115712334/LOC115712441/LOC115705580/LOC115705095/LOC115705463/LOC115705449/LOC115708273/LOC115708306/LOC115707096/LOC115707125/LOC115707903/LOC115708074/LOC115709632/LOC115709152/LOC115712749/LOC115715219/LOC115714995/LOC115714210/LOC115714817/LOC115711981/LOC115714570/LOC115715174/LOC115717214/LOC115717749/LOC115716396/LOC115715599/LOC115719635/LOC115720…	47
622	H3K56ac	GO:0009124	nucleoside monophosphate biosynthetic process	35/8108	46/15562	0.000718846	0.00708986	0.00529341	LOC115702987/LOC115708073/LOC115710919/LOC115712548/LOC115713640/LOC115706092/LOC115705417/LOC115707315/LOC115707550/LOC115709556/LOC115709792/LOC115709550/LOC115709549/LOC115712679/LOC115714115/LOC115712684/LOC115716946/LOC115716800/LOC115717339/LOC115716107/LOC115718174/LOC115719673/LOC115722392/LOC115724574/LOC115724899/LOC115725389/LOC115697110/LOC115697031/LOC115698078/LOC115697679/LOC115699…	35
623	H3K56ac	GO:0072665	protein localization to vacuole	35/8108	46/15562	0.000718846	0.00708986	0.00529341	LOC115703086/LOC115703087/LOC115697285/LOC115707485/LOC115707165/LOC115705150/LOC115705223/LOC115707170/LOC115706458/LOC115706355/LOC115705781/LOC115706166/LOC115706883/LOC115707542/LOC115710138/LOC115709432/LOC115715190/LOC115714144/LOC115712662/LOC115714209/LOC115715105/LOC115717008/LOC115716110/LOC115716091/LOC115715686/LOC115719462/LOC115722428/LOC115724067/LOC115723394/LOC115697080/LOC115698…	35
624	H3K56ac	GO:0072666	establishment of protein localization to vacuole	35/8108	46/15562	0.000718846	0.00708986	0.00529341	LOC115703086/LOC115703087/LOC115697285/LOC115707485/LOC115707165/LOC115705150/LOC115705223/LOC115707170/LOC115706458/LOC115706355/LOC115705781/LOC115706166/LOC115706883/LOC115707542/LOC115710138/LOC115709432/LOC115715190/LOC115714144/LOC115712662/LOC115714209/LOC115715105/LOC115717008/LOC115716110/LOC115716091/LOC115715686/LOC115719462/LOC115722428/LOC115724067/LOC115723394/LOC115697080/LOC115698…	35
625	H3K56ac	GO:0010608	post-transcriptional regulation of gene expression	143/8108	228/15562	0.000723349	0.00710284	0.0053031	LOC115702736/LOC115703071/LOC115704249/LOC115704391/LOC115708219/LOC115713910/LOC115695344/LOC115699825/LOC115705691/LOC115706937/LOC115706748/LOC115703606/LOC115703950/LOC115705981/LOC115705657/LOC115705095/LOC115705141/LOC115705197/LOC115705051/LOC115705449/LOC115707890/LOC115707422/LOC115705637/LOC115707065/LOC115706160/LOC115706636/LOC115707364/LOC115707179/LOC115707194/LOC115708087/LOC115704…	143
626	H3K56ac	GO:0002790	peptide secretion	2008-11-01	11/15562	0.000765455	0.00729145	0.00544392	LOC115698548/LOC115707553/LOC115714571/LOC115712600/LOC115715665/LOC115721435/LOC115720988/LOC115719647/LOC115724137/LOC115724171/LOC115698946	11
627	H3K56ac	GO:0006620	post-translational protein targeting to endoplasmic reticulum membrane	2008-11-01	11/15562	0.000765455	0.00729145	0.00544392	LOC115711387/LOC115702317/LOC115706468/LOC115706621/LOC115711629/LOC115716045/LOC115719404/LOC115719708/LOC115724624/LOC115696973/LOC115699445	11
628	H3K56ac	GO:0009306	protein secretion	2008-11-01	11/15562	0.000765455	0.00729145	0.00544392	LOC115698548/LOC115707553/LOC115714571/LOC115712600/LOC115715665/LOC115721435/LOC115720988/LOC115719647/LOC115724137/LOC115724171/LOC115698946	11
629	H3K56ac	GO:0032527	protein exit from endoplasmic reticulum	2008-11-01	11/15562	0.000765455	0.00729145	0.00544392	LOC115704956/LOC115709618/LOC115715922/LOC115716017/LOC115719693/LOC115720636/LOC115722179/LOC115722180/LOC115722128/LOC115725634/LOC115701502	11
630	H3K56ac	GO:0035592	establishment of protein localization to extracellular region	2008-11-01	11/15562	0.000765455	0.00729145	0.00544392	LOC115698548/LOC115707553/LOC115714571/LOC115712600/LOC115715665/LOC115721435/LOC115720988/LOC115719647/LOC115724137/LOC115724171/LOC115698946	11
631	H3K56ac	GO:0048209	regulation of vesicle targeting, to, from or within Golgi	2008-11-01	11/15562	0.000765455	0.00729145	0.00544392	LOC115704956/LOC115707648/LOC115704658/LOC115708096/LOC115707687/LOC115707553/LOC115707910/LOC115720636/LOC115722179/LOC115722180/LOC115698946	11
632	H3K56ac	GO:0071692	protein localization to extracellular region	2008-11-01	11/15562	0.000765455	0.00729145	0.00544392	LOC115698548/LOC115707553/LOC115714571/LOC115712600/LOC115715665/LOC115721435/LOC115720988/LOC115719647/LOC115724137/LOC115724171/LOC115698946	11
633	H3K56ac	GO:0048511	rhythmic process	53/8108	75/15562	0.000797667	0.00756596	0.00564888	LOC115702661/LOC115702815/LOC115702819/LOC115723387/LOC115695269/LOC115704391/LOC115708742/LOC115713640/LOC115697696/LOC115707608/LOC115706039/LOC115705128/LOC115705217/LOC115707308/LOC115707722/LOC115707127/LOC115707394/LOC115711550/LOC115711591/LOC115714162/LOC115712704/LOC115713414/LOC115712707/LOC115712119/LOC115714981/LOC115712353/LOC115714103/LOC115716864/LOC115717645/LOC115721312/LOC115719…	53
634	H3K56ac	GO:0051640	organelle localization	83/8108	125/15562	0.000807828	0.00762987	0.00569659	LOC115702674/LOC115703124/LOC115704956/LOC115702605/LOC115705833/LOC115706112/LOC115706299/LOC115708838/LOC115712334/LOC115699031/LOC115706608/LOC115707648/LOC115704658/LOC115705580/LOC115708180/LOC115705033/LOC115706956/LOC115705187/LOC115707485/LOC115705777/LOC115708096/LOC115707687/LOC115708236/LOC115705939/LOC115705926/LOC115707553/LOC115706291/LOC115705259/LOC115707910/LOC115708074/LOC115709…	83
635	H3K56ac	GO:0006486	protein glycosylation	100/8108	154/15562	0.000822138	0.00768558	0.00573819	LOC115702863/LOC115702925/LOC115702932/LOC115695222/LOC115709068/LOC115709580/LOC115710680/LOC115710905/LOC115711627/LOC115698949/LOC115702356/LOC115708108/LOC115707760/LOC115706556/LOC115707581/LOC115705509/LOC115704087/LOC115704435/LOC115705024/LOC115706546/LOC115707203/LOC115707301/LOC115707814/LOC115709203/LOC115711612/LOC115709633/LOC115709907/LOC115709325/LOC115710059/LOC115709992/LOC115711…	100
636	H3K56ac	GO:0043413	macromolecule glycosylation	100/8108	154/15562	0.000822138	0.00768558	0.00573819	LOC115702863/LOC115702925/LOC115702932/LOC115695222/LOC115709068/LOC115709580/LOC115710680/LOC115710905/LOC115711627/LOC115698949/LOC115702356/LOC115708108/LOC115707760/LOC115706556/LOC115707581/LOC115705509/LOC115704087/LOC115704435/LOC115705024/LOC115706546/LOC115707203/LOC115707301/LOC115707814/LOC115709203/LOC115711612/LOC115709633/LOC115709907/LOC115709325/LOC115710059/LOC115709992/LOC115711…	100
637	H3K56ac	GO:0006672	ceramide metabolic process	19/8108	22/15562	0.000827519	0.00768558	0.00573819	LOC115702927/LOC115706555/LOC115709151/LOC115712025/LOC115706113/LOC115706029/LOC115706612/LOC115705557/LOC115709662/LOC115717316/LOC115718761/LOC115719287/LOC115722446/LOC115722142/LOC115722810/LOC115697518/LOC115697449/LOC115699743/LOC115699661	19
638	H3K56ac	GO:0046653	tetrahydrofolate metabolic process	19/8108	22/15562	0.000827519	0.00768558	0.00573819	LOC115703195/LOC115725500/LOC115710463/LOC115710665/LOC115699010/LOC115700173/LOC115701123/LOC115706545/LOC115709184/LOC115709377/LOC115712098/LOC115712609/LOC115717445/LOC115719426/LOC115722401/LOC115695931/LOC115695181/LOC115697435/LOC115701524	19
639	H3K56ac	GO:0006906	vesicle fusion	31/8108	40/15562	0.000841675	0.00775245	0.00578811	LOC115708838/LOC115699031/LOC115708180/LOC115707485/LOC115708096/LOC115707687/LOC115707137/LOC115707542/LOC115707910/LOC115714478/LOC115717582/LOC115716424/LOC115715593/LOC115716110/LOC115719647/LOC115722428/LOC115724067/LOC115723463/LOC115722780/LOC115723394/LOC115723213/LOC115725765/LOC115699700/LOC115700842/LOC115698832/LOC115701240/LOC115699099/LOC115701006/LOC115698795/LOC115699497/LOC115701…	31
640	H3K56ac	GO:0042558	pteridine-containing compound metabolic process	31/8108	40/15562	0.000841675	0.00775245	0.00578811	LOC115703195/LOC115725500/LOC115710463/LOC115710665/LOC115697820/LOC115699010/LOC115700173/LOC115701123/LOC115706851/LOC115707644/LOC115704757/LOC115706452/LOC115705775/LOC115706545/LOC115709184/LOC115708773/LOC115709377/LOC115709681/LOC115712098/LOC115712609/LOC115717445/LOC115719426/LOC115722401/LOC115695931/LOC115694685/LOC115695181/LOC115698128/LOC115697435/LOC115701524/LOC115701019/LOC115699…	31
641	H3K56ac	GO:0044728	DNA methylation or demethylation	38/8108	51/15562	0.000868517	0.00796676	0.00594813	LOC115725500/LOC115702987/LOC115710463/LOC115697752/LOC115699010/LOC115703950/LOC115706114/LOC115705294/LOC115708999/LOC115709402/LOC115713936/LOC115712505/LOC115712625/LOC115711981/LOC115712154/LOC115714399/LOC115715026/LOC115712558/LOC115717183/LOC115717005/LOC115719474/LOC115719230/LOC115720751/LOC115719674/LOC115721391/LOC115721344/LOC115724100/LOC115723771/LOC115724094/LOC115724852/LOC115725…	38
642	H3K56ac	GO:0045292	mRNA cis splicing, via spliceosome	29/8108	37/15562	0.00089553	0.00818089	0.006108	LOC115703235/LOC115696283/LOC115696009/LOC115696486/LOC115705432/LOC115706268/LOC115706287/LOC115705478/LOC115705922/LOC115706184/LOC115706600/LOC115705305/LOC115709457/LOC115709389/LOC115711708/LOC115713961/LOC115716841/LOC115718181/LOC115720866/LOC115720762/LOC115722691/LOC115723141/LOC115695834/LOC115725126/LOC115725578/LOC115698290/LOC115697535/LOC115699226/LOC115700793	29
643	H3K56ac	GO:0071482	cellular response to light stimulus	54/8108	77/15562	0.000956467	0.00862368	0.00643859	LOC115702815/LOC115702819/LOC115703002/LOC115703001/LOC115703234/LOC115695661/LOC115695269/LOC115695743/LOC115710101/LOC115699248/LOC115700135/LOC115701871/LOC115706248/LOC115705128/LOC115705617/LOC115707394/LOC115707411/LOC115709600/LOC115708655/LOC115709363/LOC115710267/LOC115711301/LOC115709678/LOC115714294/LOC115714721/LOC115712237/LOC115712410/LOC115714088/LOC115712353/LOC115716057/LOC115720…	54
644	H3K56ac	GO:0031124	mRNA 3'-end processing	23/8108	28/15562	0.000959476	0.00862368	0.00643859	LOC115702617/LOC115704488/LOC115712297/LOC115712646/LOC115724500/LOC115699992/LOC115705730/LOC115709390/LOC115711551/LOC115711193/LOC115711981/LOC115714094/LOC115716882/LOC115716829/LOC115722109/LOC115723135/LOC115722256/LOC115695832/LOC115725472/LOC115701535/LOC115699674/LOC115699713/LOC115698518	23
645	H3K56ac	GO:0071985	multivesicular body sorting pathway	23/8108	28/15562	0.000959476	0.00862368	0.00643859	LOC115714437/LOC115713700/LOC115707648/LOC115704658/LOC115707165/LOC115705862/LOC115706098/LOC115707170/LOC115706355/LOC115705957/LOC115706883/LOC115707615/LOC115709281/LOC115715190/LOC115712887/LOC115717008/LOC115715686/LOC115722428/LOC115725139/LOC115697080/LOC115697841/LOC115701191/LOC115700555	23
646	H3K56ac	GO:0098732	macromolecule deacylation	23/8108	28/15562	0.000959476	0.00862368	0.00643859	LOC115702766/LOC115702813/LOC115703044/LOC115707169/LOC115714021/LOC115699021/LOC115706726/LOC115706504/LOC115707378/LOC115707379/LOC115707945/LOC115710180/LOC115711643/LOC115709622/LOC115714802/LOC115712908/LOC115717142/LOC115715578/LOC115719134/LOC115719367/LOC115719105/LOC115719643/LOC115695686	23
647	H3K56ac	GO:0051052	regulation of DNA metabolic process	75/8108	112/15562	0.000979832	0.00877127	0.00654878	LOC115705387/LOC115725500/LOC115703080/LOC115703544/LOC115703697/LOC115705615/LOC115710463/LOC115722563/LOC115697752/LOC115699010/LOC115700312/LOC115706681/LOC115706223/LOC115705214/LOC115706820/LOC115708698/LOC115709098/LOC115709941/LOC115709770/LOC115709746/LOC115709350/LOC115710064/LOC115709581/LOC115713936/LOC115714491/LOC115714083/LOC115715173/LOC115714025/LOC115714399/LOC115714461/LOC115712…	75
648	H3K56ac	GO:0051172	negative regulation of nitrogen compound metabolic process	227/8108	378/15562	0.000992711	0.00885101	0.00660832	LOC115702592/LOC115704488/LOC115702736/LOC115702766/LOC115702813/LOC115703000/LOC115698890/LOC115703078/LOC115705387/LOC115707433/LOC115715318/LOC115695222/LOC115702759/LOC115702778/LOC115703071/LOC115703697/LOC115704745/LOC115704241/LOC115704249/LOC115705210/LOC115706453/LOC115709095/LOC115710310/LOC115711694/LOC115712195/LOC115714021/LOC115722563/LOC115697325/LOC115697752/LOC115698748/LOC115699…	227
649	H3K56ac	GO:0035966	response to topologically incorrect protein	41/8108	56/15562	0.000998601	0.00886805	0.00662104	LOC115702597/LOC115706910/LOC115700360/LOC115703671/LOC115707594/LOC115707655/LOC115706276/LOC115706366/LOC115707301/LOC115707782/LOC115707966/LOC115707967/LOC115709618/LOC115712498/LOC115712378/LOC115712760/LOC115712237/LOC115714454/LOC115715137/LOC115716233/LOC115717050/LOC115716203/LOC115721137/LOC115719484/LOC115719693/LOC115718493/LOC115722633/LOC115723338/LOC115725075/LOC115725441/LOC115724…	41
650	H3K56ac	GO:0031324	negative regulation of cellular metabolic process	238/8108	398/15562	0.00105509	0.00933249	0.0069678	LOC115702592/LOC115704488/LOC115702736/LOC115702766/LOC115702795/LOC115702813/LOC115703000/LOC115698890/LOC115703078/LOC115722899/LOC115705387/LOC115705832/LOC115707433/LOC115715318/LOC115695222/LOC115702759/LOC115702778/LOC115703071/LOC115703697/LOC115704745/LOC115704241/LOC115704249/LOC115705210/LOC115706453/LOC115709095/LOC115710310/LOC115711315/LOC115711619/LOC115711694/LOC115712195/LOC115714…	238
651	H3K56ac	GO:1901264	carbohydrate derivative transport	73/8108	109/15562	0.00113188	0.00997217	0.0074454	LOC115702633/LOC115702846/LOC115706487/LOC115706814/LOC115706944/LOC115708731/LOC115708785/LOC115709724/LOC115712930/LOC115719232/LOC115699977/LOC115702314/LOC115708108/LOC115706796/LOC115707051/LOC115704850/LOC115705663/LOC115705659/LOC115703574/LOC115705555/LOC115706563/LOC115705700/LOC115706186/LOC115707036/LOC115708084/LOC115707857/LOC115705272/LOC115711611/LOC115711222/LOC115709322/LOC115710…	73
652	H3K56ac	GO:0015711	organic anion transport	123/8108	195/15562	0.00120706	0.0105927	0.00790869	LOC115702600/LOC115702633/LOC115702846/LOC115702865/LOC115703005/LOC115706487/LOC115706814/LOC115706944/LOC115708695/LOC115708731/LOC115708785/LOC115709724/LOC115712056/LOC115719232/LOC115697690/LOC115698271/LOC115699977/LOC115702314/LOC115706667/LOC115706796/LOC115707051/LOC115704850/LOC115705663/LOC115705659/LOC115708134/LOC115705844/LOC115703574/LOC115704661/LOC115705555/LOC115705590/LOC115705…	123
653	H3K56ac	GO:0030433	ubiquitin-dependent ERAD pathway	30/8108	39/15562	0.00126893	0.0110486	0.00824908	LOC115702951/LOC115714059/LOC115701199/LOC115702317/LOC115707655/LOC115706366/LOC115707195/LOC115707402/LOC115707782/LOC115709633/LOC115709618/LOC115709563/LOC115712237/LOC115715083/LOC115712804/LOC115717050/LOC115719693/LOC115722633/LOC115722554/LOC115725075/LOC115724943/LOC115725634/LOC115724769/LOC115725516/LOC115725232/LOC115697883/LOC115697176/LOC115700566/LOC115699498/LOC115699140	30
654	H3K56ac	GO:0051170	import into nucleus	30/8108	39/15562	0.00126893	0.0110486	0.00824908	LOC115702893/LOC115705296/LOC115712334/LOC115705580/LOC115705549/LOC115705463/LOC115705641/LOC115706275/LOC115707125/LOC115708733/LOC115709944/LOC115711319/LOC115712749/LOC115714817/LOC115712723/LOC115715174/LOC115717749/LOC115716396/LOC115721266/LOC115718982/LOC115718934/LOC115722167/LOC115722208/LOC115723308/LOC115725280/LOC115698272/LOC115699697/LOC115699468/LOC115699423/LOC115700543	30
655	H3K56ac	GO:0000413	protein peptidyl-prolyl isomerization	62/8108	91/15562	0.00135571	0.0117038	0.00873827	LOC115715228/LOC115717462/LOC115699935/LOC115703922/LOC115704427/LOC115704638/LOC115706704/LOC115709351/LOC115709861/LOC115709878/LOC115698652/LOC115707449/LOC115706040/LOC115705383/LOC115705206/LOC115706339/LOC115706367/LOC115706366/LOC115708727/LOC115709326/LOC115709457/LOC115708714/LOC115714767/LOC115714601/LOC115714253/LOC115714308/LOC115712551/LOC115712571/LOC115712796/LOC115717225/LOC115717…	62
656	H3K56ac	GO:0044089	positive regulation of cellular component biogenesis	28/8108	36/15562	0.00136518	0.0117038	0.00873827	LOC115702784/LOC115702799/LOC115722899/LOC115701199/LOC115706196/LOC115707206/LOC115707402/LOC115707539/LOC115708916/LOC115709989/LOC115712632/LOC115713970/LOC115712505/LOC115716110/LOC115719125/LOC115719601/LOC115718997/LOC115718638/LOC115719076/LOC115721065/LOC115722463/LOC115725691/LOC115694845/LOC115725232/LOC115700472/LOC115699311/LOC115701310/LOC115701459	28
657	H3K56ac	GO:0048278	vesicle docking	28/8108	36/15562	0.00136518	0.0117038	0.00873827	LOC115703124/LOC115702605/LOC115705833/LOC115708838/LOC115699031/LOC115708180/LOC115707485/LOC115705939/LOC115705926/LOC115710297/LOC115714478/LOC115716424/LOC115715729/LOC115717103/LOC115721435/LOC115719647/LOC115722128/LOC115722780/LOC115723213/LOC115695718/LOC115725765/LOC115697322/LOC115699700/LOC115699413/LOC115698832/LOC115701240/LOC115699099/LOC115698795	28
658	H3K56ac	GO:0072598	protein localization to chloroplast	28/8108	36/15562	0.00136518	0.0117038	0.00873827	LOC115702808/LOC115703009/LOC115700804/LOC115702343/LOC115703223/LOC115707682/LOC115707508/LOC115709760/LOC115712478/LOC115712837/LOC115713070/LOC115712140/LOC115716627/LOC115717040/LOC115716334/LOC115716385/LOC115721413/LOC115720661/LOC115719379/LOC115718942/LOC115720949/LOC115723044/LOC115724746/LOC115695636/LOC115725387/LOC115697383/LOC115701343/LOC115701414	28
659	H3K56ac	GO:0006887	exocytosis	40/8108	55/15562	0.00142404	0.0120691	0.00901103	LOC115702608/LOC115702674/LOC115703124/LOC115703160/LOC115702605/LOC115705833/LOC115709655/LOC115710763/LOC115700150/LOC115700291/LOC115705400/LOC115705939/LOC115705926/LOC115706389/LOC115707117/LOC115711282/LOC115710297/LOC115709365/LOC115713924/LOC115714478/LOC115716128/LOC115715729/LOC115717103/LOC115721435/LOC115721257/LOC115718881/LOC115718650/LOC115722128/LOC115722780/LOC115723213/LOC115695…	40
660	H3K56ac	GO:0031503	protein-containing complex localization	40/8108	55/15562	0.00142404	0.0120691	0.00901103	LOC115702808/LOC115705296/LOC115709655/LOC115712334/LOC115700291/LOC115705580/LOC115705095/LOC115705463/LOC115708273/LOC115708306/LOC115707096/LOC115707125/LOC115708074/LOC115709316/LOC115709632/LOC115709152/LOC115715219/LOC115714995/LOC115714210/LOC115711981/LOC115712237/LOC115716128/LOC115717214/LOC115715599/LOC115719003/LOC115722220/LOC115722564/LOC115721842/LOC115721800/LOC115721841/LOC115724…	40
661	H3K56ac	GO:0035967	cellular response to topologically incorrect protein	40/8108	55/15562	0.00142404	0.0120691	0.00901103	LOC115702597/LOC115706910/LOC115700360/LOC115703671/LOC115707594/LOC115707655/LOC115706276/LOC115706366/LOC115707301/LOC115707782/LOC115707966/LOC115707967/LOC115709618/LOC115712498/LOC115712378/LOC115712760/LOC115712237/LOC115714454/LOC115715137/LOC115716233/LOC115717050/LOC115721137/LOC115719484/LOC115719693/LOC115718493/LOC115722633/LOC115723338/LOC115725075/LOC115725441/LOC115724943/LOC115725…	40
662	H3K56ac	GO:0140694	non-membrane-bounded organelle assembly	85/8108	130/15562	0.0014367	0.0120917	0.00902789	LOC115702907/LOC115703042/LOC115708919/LOC115709368/LOC115698624/LOC115699845/LOC115705545/LOC115708213/LOC115705126/LOC115705011/LOC115705197/LOC115706595/LOC115703901/LOC115707381/LOC115708260/LOC115706414/LOC115706522/LOC115707041/LOC115707151/LOC115707838/LOC115705259/LOC115705252/LOC115708021/LOC115708052/LOC115708074/LOC115709529/LOC115709119/LOC115709213/LOC115709214/LOC115709215/LOC115710…	85
663	H3K56ac	GO:0006515	protein quality control for misfolded or incompletely synthesized proteins	26/8108	33/15562	0.0014484	0.0120917	0.00902789	LOC115707753/LOC115700360/LOC115705857/LOC115703899/LOC115706276/LOC115706366/LOC115707997/LOC115709618/LOC115712237/LOC115714454/LOC115715137/LOC115716897/LOC115716512/LOC115716095/LOC115718902/LOC115719712/LOC115719693/LOC115719194/LOC115723338/LOC115725486/LOC115725631/LOC115725487/LOC115725516/LOC115699704/LOC115699241/LOC115699498	26
664	H3K56ac	GO:0030148	sphingolipid biosynthetic process	26/8108	33/15562	0.0014484	0.0120917	0.00902789	LOC115702927/LOC115706555/LOC115709151/LOC115713775/LOC115700382/LOC115706029/LOC115706612/LOC115705557/LOC115706893/LOC115707058/LOC115709662/LOC115712929/LOC115714440/LOC115712891/LOC115717316/LOC115718761/LOC115719287/LOC115719383/LOC115722810/LOC115722940/LOC115724429/LOC115697518/LOC115697449/LOC115699698/LOC115699743/LOC115699661	26
665	H3K56ac	GO:0060627	regulation of vesicle-mediated transport	26/8108	33/15562	0.0014484	0.0120917	0.00902789	LOC115702608/LOC115702674/LOC115704956/LOC115707648/LOC115704658/LOC115708096/LOC115707687/LOC115707553/LOC115707910/LOC115709043/LOC115715625/LOC115715575/LOC115721435/LOC115720636/LOC115722179/LOC115722180/LOC115697415/LOC115698946/LOC115698832/LOC115701073/LOC115699099/LOC115701006/LOC115700471/LOC115700332/LOC115699497/LOC115701227	26
666	H3K56ac	GO:0045898	regulation of RNA polymerase II transcription preinitiation complex assembly	2008-10-01	10/15562	0.00147004	0.0121811	0.00909461	LOC115701199/LOC115706196/LOC115707206/LOC115707402/LOC115707539/LOC115716110/LOC115719601/LOC115718997/LOC115719076/LOC115725232	10
667	H3K56ac	GO:0045899	positive regulation of RNA polymerase II transcription preinitiation complex assembly	2008-10-01	10/15562	0.00147004	0.0121811	0.00909461	LOC115701199/LOC115706196/LOC115707206/LOC115707402/LOC115707539/LOC115716110/LOC115719601/LOC115718997/LOC115719076/LOC115725232	10
668	H3K56ac	GO:0035601	protein deacylation	20/8108	24/15562	0.00149746	0.0123624	0.00922999	LOC115702766/LOC115702813/LOC115703044/LOC115707169/LOC115714021/LOC115699021/LOC115706726/LOC115707378/LOC115707379/LOC115707945/LOC115710180/LOC115711643/LOC115709622/LOC115714802/LOC115712908/LOC115719134/LOC115719367/LOC115719105/LOC115719643/LOC115695686	20
669	H3K56ac	GO:0051205	protein insertion into membrane	24/8108	30/15562	0.00150833	0.0124061	0.00926263	LOC115702923/LOC115699346/LOC115705207/LOC115705865/LOC115706621/LOC115710116/LOC115713070/LOC115714976/LOC115716627/LOC115715734/LOC115717977/LOC115716410/LOC115721139/LOC115720973/LOC115719379/LOC115721380/LOC115719610/LOC115718942/LOC115719193/LOC115721298/LOC115695636/LOC115699591/LOC115699013/LOC115701113	24
670	H3K56ac	GO:0009126	purine nucleoside monophosphate metabolic process	22/8108	27/15562	0.00153087	0.0124993	0.00933223	LOC115708073/LOC115712548/LOC115713640/LOC115706092/LOC115705417/LOC115707550/LOC115709677/LOC115709550/LOC115709549/LOC115712679/LOC115714115/LOC115712684/LOC115716946/LOC115716800/LOC115717339/LOC115716107/LOC115719673/LOC115722392/LOC115722830/LOC115725389/LOC115697031/LOC115697679	22
671	H3K56ac	GO:0009167	purine ribonucleoside monophosphate metabolic process	22/8108	27/15562	0.00153087	0.0124993	0.00933223	LOC115708073/LOC115712548/LOC115713640/LOC115706092/LOC115705417/LOC115707550/LOC115709677/LOC115709550/LOC115709549/LOC115712679/LOC115714115/LOC115712684/LOC115716946/LOC115716800/LOC115717339/LOC115716107/LOC115719673/LOC115722392/LOC115722830/LOC115725389/LOC115697031/LOC115697679	22
672	H3K56ac	GO:0043094	cellular metabolic compound salvage	43/8108	60/15562	0.00155579	0.0126564	0.00944952	LOC115698387/LOC115706299/LOC115712548/LOC115713640/LOC115698624/LOC115702364/LOC115705417/LOC115706479/LOC115706190/LOC115705995/LOC115706293/LOC115706545/LOC115707835/LOC115707836/LOC115705285/LOC115709681/LOC115712801/LOC115714140/LOC115715155/LOC115714176/LOC115714984/LOC115716313/LOC115717223/LOC115717101/LOC115717445/LOC115717263/LOC115720661/LOC115720958/LOC115724133/LOC115723363/LOC115722…	43
673	H3K56ac	GO:0070085	glycosylation	119/8108	189/15562	0.00157954	0.0128029	0.00955887	LOC115702818/LOC115702834/LOC115702863/LOC115702925/LOC115702932/LOC115695222/LOC115709068/LOC115709176/LOC115709580/LOC115710680/LOC115710905/LOC115711627/LOC115713817/LOC115698949/LOC115702356/LOC115708108/LOC115707760/LOC115706556/LOC115707581/LOC115705509/LOC115705095/LOC115704087/LOC115704435/LOC115705024/LOC115706546/LOC115707203/LOC115707301/LOC115707780/LOC115707814/LOC115709203/LOC115711…	119
674	H3K56ac	GO:0034248	regulation of cellular amide metabolic process	93/8108	144/15562	0.00158631	0.0128112	0.00956507	LOC115702736/LOC115703071/LOC115708219/LOC115713910/LOC115695344/LOC115699825/LOC115706748/LOC115705981/LOC115705657/LOC115705197/LOC115707422/LOC115706612/LOC115707065/LOC115707364/LOC115707179/LOC115707194/LOC115704236/LOC115707916/LOC115710303/LOC115709250/LOC115711529/LOC115711550/LOC115708792/LOC115709629/LOC115710114/LOC115710090/LOC115710091/LOC115709394/LOC115709323/LOC115709330/LOC115715…	93
675	H3K56ac	GO:2000026	regulation of multicellular organismal development	165/8108	270/15562	0.00163427	0.0131509	0.00981868	LOC115702773/LOC115702813/LOC115702924/LOC115703013/LOC115722899/LOC115705744/LOC115707433/LOC115715318/LOC115695464/LOC115695661/LOC115695269/LOC115695743/LOC115704391/LOC115706453/LOC115707536/LOC115708742/LOC115709817/LOC115710161/LOC115710310/LOC115711259/LOC115711881/LOC115712842/LOC115722652/LOC115714628/LOC115719082/LOC115724500/LOC115697325/LOC115700312/LOC115700855/LOC115702329/LOC115705…	165
676	H3K56ac	GO:0000096	sulfur amino acid metabolic process	46/8108	65/15562	0.00165657	0.0132824	0.00991686	LOC115702618/LOC115703014/LOC115713573/LOC115715228/LOC115703995/LOC115706332/LOC115705658/LOC115706566/LOC115706479/LOC115705662/LOC115703573/LOC115706293/LOC115707895/LOC115707749/LOC115708041/LOC115709268/LOC115710211/LOC115712805/LOC115712011/LOC115714998/LOC115719426/LOC115721145/LOC115719520/LOC115719688/LOC115720736/LOC115719358/LOC115723457/LOC115722834/LOC115721731/LOC115722194/LOC115721…	46
677	H3K56ac	GO:0006338	chromatin remodeling	70/8108	105/15562	0.00170738	0.0136407	0.0101844	LOC115707931/LOC115706462/LOC115706637/LOC115708259/LOC115705161/LOC115705214/LOC115705230/LOC115705637/LOC115706471/LOC115708283/LOC115704907/LOC115703595/LOC115707276/LOC115707295/LOC115711678/LOC115709260/LOC115708673/LOC115709629/LOC115709826/LOC115710064/LOC115709710/LOC115715115/LOC115714491/LOC115714359/LOC115714270/LOC115712505/LOC115712648/LOC115714046/LOC115713011/LOC115715079/LOC115712…	70
678	H3K56ac	GO:0045454	cell redox homeostasis	52/8108	75/15562	0.00177641	0.0141415	0.0105583	LOC115702840/LOC115703028/LOC115702953/LOC115705652/LOC115709121/LOC115709151/LOC115713788/LOC115714328/LOC115699671/LOC115696683/LOC115703831/LOC115705714/LOC115705874/LOC115706278/LOC115707749/LOC115707847/LOC115707903/LOC115711616/LOC115709786/LOC115709572/LOC115710638/LOC115712633/LOC115712631/LOC115714330/LOC115714256/LOC115713008/LOC115712830/LOC115712173/LOC115715221/LOC115714333/LOC115714…	52
679	H3K56ac	GO:0009132	nucleoside diphosphate metabolic process	61/8108	90/15562	0.00180057	0.0142828	0.0106638	LOC115704378/LOC115709638/LOC115710101/LOC115710877/LOC115711259/LOC115711637/LOC115723768/LOC115701945/LOC115702002/LOC115702325/LOC115705137/LOC115705136/LOC115705721/LOC115705557/LOC115705493/LOC115705825/LOC115706460/LOC115707173/LOC115706266/LOC115707115/LOC115707116/LOC115707250/LOC115707400/LOC115707547/LOC115707565/LOC115710217/LOC115709404/LOC115709279/LOC115709908/LOC115709324/LOC115709…	61
680	H3K56ac	GO:0006417	regulation of translation	91/8108	141/15562	0.00182665	0.0144383	0.0107799	LOC115702736/LOC115703071/LOC115708219/LOC115713910/LOC115695344/LOC115699825/LOC115706748/LOC115705981/LOC115705657/LOC115705197/LOC115707422/LOC115707065/LOC115707364/LOC115707179/LOC115707194/LOC115704236/LOC115707916/LOC115710303/LOC115709250/LOC115711529/LOC115711550/LOC115708792/LOC115709629/LOC115710114/LOC115710090/LOC115710091/LOC115709394/LOC115709323/LOC115709330/LOC115715098/LOC115711…	91
681	H3K56ac	GO:0006903	vesicle targeting	15/8108	17/15562	0.00201188	0.0158462	0.011831	LOC115704956/LOC115707648/LOC115704658/LOC115708096/LOC115707687/LOC115705926/LOC115707553/LOC115707910/LOC115709432/LOC115716193/LOC115716017/LOC115720636/LOC115722179/LOC115722180/LOC115698946	15
682	H3K56ac	GO:0000462	maturation of SSU-rRNA from tricistronic rRNA transcript (SSU-rRNA, 5.8S rRNA, LSU-rRNA)	27/8108	35/15562	0.002067	0.016223	0.0121124	LOC115702948/LOC115705135/LOC115707739/LOC115705252/LOC115708027/LOC115710297/LOC115714247/LOC115716650/LOC115716774/LOC115720655/LOC115721168/LOC115719675/LOC115722452/LOC115722941/LOC115723138/LOC115695946/LOC115725129/LOC115725370/LOC115725582/LOC115725365/LOC115697840/LOC115701177/LOC115701330/LOC115700663/LOC115699717/LOC115700468/LOC115700470	27
683	H3K56ac	GO:0018209	peptidyl-serine modification	53/8108	77/15562	0.00208041	0.016271	0.0121482	LOC115702856/LOC115703248/LOC115705575/LOC115711980/LOC115712879/LOC115714510/LOC115705433/LOC115705436/LOC115705215/LOC115705415/LOC115707407/LOC115705375/LOC115706346/LOC115706067/LOC115706373/LOC115707012/LOC115707180/LOC115707520/LOC115707762/LOC115709990/LOC115709844/LOC115709223/LOC115711653/LOC115714119/LOC115712906/LOC115712186/LOC115714943/LOC115713827/LOC115712878/LOC115712871/LOC115716…	53
684	H3K56ac	GO:0009639	response to red or far red light	69/8108	104/15562	0.00221952	0.0172983	0.0129152	LOC115702819/LOC115702401/LOC115715318/LOC115695661/LOC115695269/LOC115695743/LOC115704391/LOC115708742/LOC115710101/LOC115697431/LOC115700135/LOC115701464/LOC115706248/LOC115705128/LOC115705609/LOC115708198/LOC115706819/LOC115707394/LOC115707486/LOC115707773/LOC115711550/LOC115710181/LOC115709760/LOC115709756/LOC115709438/LOC115710239/LOC115710090/LOC115710091/LOC115709153/LOC115712712/LOC115714…	69
685	H3K56ac	GO:0016485	protein processing	45/8108	64/15562	0.00228621	0.0174614	0.013037	LOC115702913/LOC115703144/LOC115708757/LOC115710440/LOC115718911/LOC115697785/LOC115699243/LOC115699901/LOC115705189/LOC115706482/LOC115704985/LOC115705515/LOC115705482/LOC115706413/LOC115706415/LOC115706722/LOC115707559/LOC115710183/LOC115709737/LOC115708811/LOC115709684/LOC115708660/LOC115714035/LOC115716586/LOC115715612/LOC115716496/LOC115716095/LOC115716140/LOC115716154/LOC115718579/LOC115721…	45
686	H3K56ac	GO:0009742	brassinosteroid mediated signaling pathway	32/8108	43/15562	0.00228797	0.0174614	0.013037	LOC115722899/LOC115720050/LOC115702467/LOC115712441/LOC115713972/LOC115700469/LOC115708164/LOC115706523/LOC115709598/LOC115711536/LOC115710209/LOC115714993/LOC115715238/LOC115712674/LOC115717645/LOC115715983/LOC115716204/LOC115717124/LOC115717323/LOC115715972/LOC115715971/LOC115721039/LOC115719192/LOC115721183/LOC115696908/LOC115697346/LOC115697642/LOC115697851/LOC115698697/LOC115699643/LOC115699…	32
687	H3K56ac	GO:0034504	protein localization to nucleus	32/8108	43/15562	0.00228797	0.0174614	0.013037	LOC115702893/LOC115705296/LOC115712334/LOC115705580/LOC115705549/LOC115705463/LOC115705641/LOC115708236/LOC115706275/LOC115707125/LOC115708733/LOC115709944/LOC115711319/LOC115712749/LOC115714817/LOC115712723/LOC115712237/LOC115715174/LOC115717749/LOC115716396/LOC115721266/LOC115718982/LOC115718934/LOC115722167/LOC115722208/LOC115723308/LOC115725280/LOC115698272/LOC115699697/LOC115699468/LOC115699…	32
688	H3K56ac	GO:0043401	steroid hormone mediated signaling pathway	32/8108	43/15562	0.00228797	0.0174614	0.013037	LOC115722899/LOC115720050/LOC115702467/LOC115712441/LOC115713972/LOC115700469/LOC115708164/LOC115706523/LOC115709598/LOC115711536/LOC115710209/LOC115714993/LOC115715238/LOC115712674/LOC115717645/LOC115715983/LOC115716204/LOC115717124/LOC115717323/LOC115715972/LOC115715971/LOC115721039/LOC115719192/LOC115721183/LOC115696908/LOC115697346/LOC115697642/LOC115697851/LOC115698697/LOC115699643/LOC115699…	32
689	H3K56ac	GO:0048545	response to steroid hormone	32/8108	43/15562	0.00228797	0.0174614	0.013037	LOC115722899/LOC115720050/LOC115702467/LOC115712441/LOC115713972/LOC115700469/LOC115708164/LOC115706523/LOC115709598/LOC115711536/LOC115710209/LOC115714993/LOC115715238/LOC115712674/LOC115717645/LOC115715983/LOC115716204/LOC115717124/LOC115717323/LOC115715972/LOC115715971/LOC115721039/LOC115719192/LOC115721183/LOC115696908/LOC115697346/LOC115697642/LOC115697851/LOC115698697/LOC115699643/LOC115699…	32
690	H3K56ac	GO:0071383	cellular response to steroid hormone stimulus	32/8108	43/15562	0.00228797	0.0174614	0.013037	LOC115722899/LOC115720050/LOC115702467/LOC115712441/LOC115713972/LOC115700469/LOC115708164/LOC115706523/LOC115709598/LOC115711536/LOC115710209/LOC115714993/LOC115715238/LOC115712674/LOC115717645/LOC115715983/LOC115716204/LOC115717124/LOC115717323/LOC115715972/LOC115715971/LOC115721039/LOC115719192/LOC115721183/LOC115696908/LOC115697346/LOC115697642/LOC115697851/LOC115698697/LOC115699643/LOC115699…	32
691	H3K56ac	GO:0006896	Golgi to vacuole transport	17/8108	20/15562	0.00230312	0.0174614	0.013037	LOC115703086/LOC115703087/LOC115715804/LOC115707542/LOC115709432/LOC115708998/LOC115709400/LOC115714494/LOC115712667/LOC115716110/LOC115718438/LOC115724067/LOC115723394/LOC115697734/LOC115700904/LOC115700842/LOC115701505	17
692	H3K56ac	GO:0051204	protein insertion into mitochondrial membrane	17/8108	20/15562	0.00230312	0.0174614	0.013037	LOC115702923/LOC115699346/LOC115705865/LOC115714976/LOC115716627/LOC115715734/LOC115717977/LOC115721139/LOC115721380/LOC115719610/LOC115718942/LOC115719193/LOC115721298/LOC115695636/LOC115699591/LOC115699013/LOC115701113	17
693	H3K56ac	GO:0018345	protein palmitoylation	23/8108	29/15562	0.0023475	0.0177375	0.0132432	LOC115702642/LOC115717286/LOC115708202/LOC115705836/LOC115703955/LOC115707764/LOC115708159/LOC115705954/LOC115706335/LOC115709112/LOC115712379/LOC115717604/LOC115718640/LOC115719529/LOC115722528/LOC115721743/LOC115722704/LOC115694722/LOC115725064/LOC115701348/LOC115699410/LOC115699481/LOC115699061	23
694	H3K56ac	GO:0033013	tetrapyrrole metabolic process	60/8108	89/15562	0.00238022	0.017924	0.0133824	LOC115702924/LOC115713909/LOC115722977/LOC115705600/LOC115707610/LOC115707736/LOC115695131/LOC115695173/LOC115695432/LOC115697431/LOC115699277/LOC115705519/LOC115705686/LOC115706149/LOC115705760/LOC115706229/LOC115706234/LOC115706819/LOC115708025/LOC115708039/LOC115709778/LOC115710263/LOC115709045/LOC115711257/LOC115711605/LOC115709985/LOC115710087/LOC115714382/LOC115714846/LOC115716795/LOC115716…	60
695	H3K56ac	GO:0006778	porphyrin-containing compound metabolic process	57/8108	84/15562	0.00240768	0.0180196	0.0134538	LOC115702924/LOC115713909/LOC115722977/LOC115705600/LOC115707610/LOC115707736/LOC115695173/LOC115697431/LOC115699277/LOC115705519/LOC115705686/LOC115706149/LOC115705760/LOC115706229/LOC115706234/LOC115706819/LOC115708025/LOC115708039/LOC115709778/LOC115710263/LOC115709045/LOC115711257/LOC115711605/LOC115709985/LOC115710087/LOC115714382/LOC115714846/LOC115716795/LOC115716985/LOC115716460/LOC115719…	57
696	H3K56ac	GO:0009642	response to light intensity	54/8108	79/15562	0.00241643	0.0180196	0.0134538	LOC115702661/LOC115702748/LOC115703002/LOC115703001/LOC115703234/LOC115713739/LOC115715228/LOC115715318/LOC115700804/LOC115708695/LOC115699277/LOC115705632/LOC115706004/LOC115706574/LOC115707394/LOC115705298/LOC115708039/LOC115708049/LOC115711511/LOC115714342/LOC115715238/LOC115712119/LOC115712410/LOC115716022/LOC115716154/LOC115716203/LOC115716851/LOC115719484/LOC115720760/LOC115720925/LOC115719…	54
697	H3K56ac	GO:0032509	endosome transport via multivesicular body sorting pathway	21/8108	26/15562	0.00242525	0.0180196	0.0134538	LOC115714437/LOC115713700/LOC115707648/LOC115704658/LOC115707165/LOC115705862/LOC115706098/LOC115707170/LOC115706355/LOC115705957/LOC115706883/LOC115707615/LOC115709281/LOC115715190/LOC115712887/LOC115717008/LOC115715686/LOC115725139/LOC115697080/LOC115701191/LOC115700555	21
698	H3K56ac	GO:0035195	miRNA-mediated gene silencing	21/8108	26/15562	0.00242525	0.0180196	0.0134538	LOC115704391/LOC115705691/LOC115706160/LOC115706636/LOC115708792/LOC115709646/LOC115709347/LOC115714129/LOC115716447/LOC115716262/LOC115716551/LOC115720772/LOC115720866/LOC115719200/LOC115721800/LOC115725377/LOC115695915/LOC115695839/LOC115725280/LOC115700793/LOC115700608	21
699	H3K56ac	GO:0001522	pseudouridine synthesis	30/8108	40/15562	0.00255069	0.0188887	0.0141026	LOC115702770/LOC115702975/LOC115703055/LOC115700804/LOC115710828/LOC115712383/LOC115722758/LOC115706746/LOC115704040/LOC115705943/LOC115711398/LOC115709829/LOC115711406/LOC115711482/LOC115714335/LOC115714823/LOC115714284/LOC115712869/LOC115716644/LOC115719111/LOC115719556/LOC115719683/LOC115721120/LOC115720948/LOC115722292/LOC115724959/LOC115698563/LOC115699739/LOC115700901/LOC115698795	30
700	H3K56ac	GO:0006914	autophagy	43/8108	61/15562	0.00262788	0.0192682	0.014386	LOC115702597/LOC115702795/LOC115702917/LOC115722899/LOC115705660/LOC115705150/LOC115705223/LOC115706458/LOC115704100/LOC115707408/LOC115707830/LOC115710151/LOC115709618/LOC115713047/LOC115712807/LOC115714295/LOC115714313/LOC115713962/LOC115714991/LOC115714395/LOC115712823/LOC115716818/LOC115717730/LOC115716619/LOC115717145/LOC115719693/LOC115719509/LOC115719645/LOC115722273/LOC115724142/LOC115722…	43
701	H3K56ac	GO:0061025	membrane fusion	43/8108	61/15562	0.00262788	0.0192682	0.014386	LOC115704030/LOC115708838/LOC115699031/LOC115708180/LOC115707485/LOC115708096/LOC115707687/LOC115706947/LOC115707091/LOC115707137/LOC115707408/LOC115707542/LOC115707910/LOC115709824/LOC115714649/LOC115714478/LOC115717582/LOC115716668/LOC115716424/LOC115715593/LOC115716110/LOC115719647/LOC115722428/LOC115723467/LOC115724067/LOC115723463/LOC115723271/LOC115722780/LOC115723394/LOC115723213/LOC115725…	43
702	H3K56ac	GO:0061919	process utilizing autophagic mechanism	43/8108	61/15562	0.00262788	0.0192682	0.014386	LOC115702597/LOC115702795/LOC115702917/LOC115722899/LOC115705660/LOC115705150/LOC115705223/LOC115706458/LOC115704100/LOC115707408/LOC115707830/LOC115710151/LOC115709618/LOC115713047/LOC115712807/LOC115714295/LOC115714313/LOC115713962/LOC115714991/LOC115714395/LOC115712823/LOC115716818/LOC115717730/LOC115716619/LOC115717145/LOC115719693/LOC115719509/LOC115719645/LOC115722273/LOC115724142/LOC115722…	43
703	H3K56ac	GO:0006621	protein retention in ER lumen	2008-12-01	13/15562	0.00269114	0.0194758	0.014541	LOC115702727/LOC115702737/LOC115702753/LOC115702754/LOC115704352/LOC115704344/LOC115702407/LOC115698324/LOC115700972/LOC115703577/LOC115714825/LOC115697781	12
704	H3K56ac	GO:0035999	tetrahydrofolate interconversion	2008-12-01	13/15562	0.00269114	0.0194758	0.014541	LOC115703195/LOC115725500/LOC115710463/LOC115699010/LOC115706545/LOC115709377/LOC115717445/LOC115719426/LOC115722401/LOC115695931/LOC115695181/LOC115697435	12
705	H3K56ac	GO:0042761	very long-chain fatty acid biosynthetic process	2008-12-01	13/15562	0.00269114	0.0194758	0.014541	LOC115700382/LOC115708003/LOC115712551/LOC115712929/LOC115714440/LOC115720575/LOC115719383/LOC115722414/LOC115722469/LOC115724429/LOC115697502/LOC115699743	12
706	H3K56ac	GO:0043966	histone H3 acetylation	2008-12-01	13/15562	0.00269114	0.0194758	0.014541	LOC115706726/LOC115705986/LOC115711498/LOC115714802/LOC115712232/LOC115711947/LOC115714102/LOC115716162/LOC115695686/LOC115696226/LOC115700819/LOC115700835	12
707	H3K56ac	GO:0010243	response to organonitrogen compound	92/8108	144/15562	0.00272267	0.0196403	0.0146638	LOC115702722/LOC115702951/LOC115703078/LOC115722899/LOC115705226/LOC115706910/LOC115710310/LOC115711881/LOC115713627/LOC115714059/LOC115718690/LOC115699010/LOC115699627/LOC115699852/LOC115696542/LOC115700360/LOC115701199/LOC115702317/LOC115705632/LOC115706493/LOC115705593/LOC115707594/LOC115707655/LOC115706276/LOC115706366/LOC115708164/LOC115706832/LOC115707195/LOC115707402/LOC115707782/LOC115707…	92
708	H3K56ac	GO:0048284	organelle fusion	49/8108	71/15562	0.00277447	0.0199493	0.0148945	LOC115704030/LOC115708838/LOC115699031/LOC115706608/LOC115708180/LOC115704008/LOC115707485/LOC115708096/LOC115707687/LOC115706947/LOC115707137/LOC115707542/LOC115707910/LOC115709646/LOC115709404/LOC115709279/LOC115711922/LOC115714154/LOC115714478/LOC115714247/LOC115717582/LOC115716668/LOC115716424/LOC115715593/LOC115716110/LOC115721156/LOC115719065/LOC115719647/LOC115722428/LOC115724067/LOC115723…	49
709	H3K56ac	GO:0018105	peptidyl-serine phosphorylation	52/8108	76/15562	0.00279392	0.0200246	0.0149507	LOC115702856/LOC115703248/LOC115705575/LOC115711980/LOC115712879/LOC115714510/LOC115705433/LOC115705436/LOC115705215/LOC115705415/LOC115707407/LOC115705375/LOC115706346/LOC115706067/LOC115706373/LOC115707012/LOC115707180/LOC115707520/LOC115707762/LOC115709844/LOC115709223/LOC115711653/LOC115714119/LOC115712906/LOC115712186/LOC115714943/LOC115713827/LOC115712878/LOC115712871/LOC115716601/LOC115716…	52
710	H3K56ac	GO:0006405	RNA export from nucleus	38/8108	53/15562	0.00284393	0.0203177	0.0151696	LOC115702808/LOC115705296/LOC115707318/LOC115712334/LOC115705580/LOC115705095/LOC115705463/LOC115708273/LOC115708306/LOC115707096/LOC115707125/LOC115708074/LOC115709632/LOC115709152/LOC115712749/LOC115715219/LOC115714995/LOC115714210/LOC115711981/LOC115715174/LOC115717214/LOC115717749/LOC115716396/LOC115719635/LOC115719003/LOC115722220/LOC115722564/LOC115721800/LOC115724445/LOC115724650/LOC115725…	38
711	H3K56ac	GO:0009845	seed germination	65/8108	98/15562	0.00296985	0.0211495	0.0157906	LOC115702724/LOC115702725/LOC115703013/LOC115703251/LOC115717286/LOC115695464/LOC115709176/LOC115712548/LOC115713788/LOC115700855/LOC115705217/LOC115706211/LOC115704840/LOC115706893/LOC115707340/LOC115707473/LOC115705254/LOC115707891/LOC115710181/LOC115709676/LOC115710197/LOC115711545/LOC115708807/LOC115709323/LOC115709330/LOC115712712/LOC115712738/LOC115712760/LOC115712906/LOC115714981/LOC115711…	65
712	H3K56ac	GO:0045036	protein targeting to chloroplast	26/8108	34/15562	0.00310714	0.0219867	0.0164156	LOC115702808/LOC115703009/LOC115700804/LOC115703223/LOC115707682/LOC115707508/LOC115709760/LOC115712478/LOC115712837/LOC115712140/LOC115716627/LOC115717040/LOC115716334/LOC115716385/LOC115721413/LOC115720661/LOC115719379/LOC115718942/LOC115720949/LOC115723044/LOC115724746/LOC115695636/LOC115725387/LOC115697383/LOC115701343/LOC115701414	26
713	H3K56ac	GO:0072596	establishment of protein localization to chloroplast	26/8108	34/15562	0.00310714	0.0219867	0.0164156	LOC115702808/LOC115703009/LOC115700804/LOC115703223/LOC115707682/LOC115707508/LOC115709760/LOC115712478/LOC115712837/LOC115712140/LOC115716627/LOC115717040/LOC115716334/LOC115716385/LOC115721413/LOC115720661/LOC115719379/LOC115718942/LOC115720949/LOC115723044/LOC115724746/LOC115695636/LOC115725387/LOC115697383/LOC115701343/LOC115701414	26
714	H3K56ac	GO:0001101	response to acid chemical	134/8108	218/15562	0.00314426	0.0221789	0.0165592	LOC115702661/LOC115702773/LOC115702862/LOC115702924/LOC115702951/LOC115703078/LOC115703234/LOC115707089/LOC115702461/LOC115712195/LOC115712694/LOC115724355/LOC115697431/LOC115707451/LOC115707742/LOC115706110/LOC115706045/LOC115705123/LOC115706206/LOC115705192/LOC115704794/LOC115706176/LOC115706478/LOC115705788/LOC115706004/LOC115706104/LOC115706197/LOC115706485/LOC115707364/LOC115707411/LOC115705…	134
715	H3K56ac	GO:0032511	late endosome to vacuole transport via multivesicular body sorting pathway	14/8108	16/15562	0.00344003	0.0240371	0.0179465	LOC115714437/LOC115713700/LOC115707165/LOC115706098/LOC115707170/LOC115706355/LOC115706883/LOC115709281/LOC115715190/LOC115717008/LOC115715686/LOC115725139/LOC115697080/LOC115701191	14
716	H3K56ac	GO:0035510	DNA dealkylation	14/8108	16/15562	0.00344003	0.0240371	0.0179465	LOC115702987/LOC115700865/LOC115705294/LOC115713936/LOC115714399/LOC115714447/LOC115715026/LOC115719474/LOC115719230/LOC115719674/LOC115721391/LOC115723771/LOC115697333/LOC115697728	14
717	H3K56ac	GO:0052546	cell wall pectin metabolic process	14/8108	16/15562	0.00344003	0.0240371	0.0179465	LOC115702724/LOC115702725/LOC115706556/LOC115706874/LOC115706573/LOC115706634/LOC115707880/LOC115709676/LOC115709150/LOC115714929/LOC115714456/LOC115716311/LOC115722301/LOC115697035	14
718	H3K56ac	GO:0071214	cellular response to abiotic stimulus	84/8108	131/15562	0.00350588	0.0243445	0.0181761	LOC115702815/LOC115702819/LOC115703137/LOC115703002/LOC115703001/LOC115703234/LOC115713415/LOC115721756/LOC115695661/LOC115695269/LOC115695743/LOC115703041/LOC115710101/LOC115699248/LOC115700135/LOC115701871/LOC115706248/LOC115705128/LOC115705617/LOC115705788/LOC115706104/LOC115707394/LOC115707411/LOC115705243/LOC115705239/LOC115709600/LOC115708655/LOC115709363/LOC115710267/LOC115711301/LOC115709…	84
719	H3K56ac	GO:0104004	cellular response to environmental stimulus	84/8108	131/15562	0.00350588	0.0243445	0.0181761	LOC115702815/LOC115702819/LOC115703137/LOC115703002/LOC115703001/LOC115703234/LOC115713415/LOC115721756/LOC115695661/LOC115695269/LOC115695743/LOC115703041/LOC115710101/LOC115699248/LOC115700135/LOC115701871/LOC115706248/LOC115705128/LOC115705617/LOC115705788/LOC115706104/LOC115707394/LOC115707411/LOC115705243/LOC115705239/LOC115709600/LOC115708655/LOC115709363/LOC115710267/LOC115711301/LOC115709…	84
720	H3K56ac	GO:0034655	nucleobase-containing compound catabolic process	107/8108	171/15562	0.00352883	0.0244278	0.0182382	LOC115702736/LOC115702795/LOC115703193/LOC115703195/LOC115696485/LOC115703071/LOC115703104/LOC115703796/LOC115704249/LOC115709368/LOC115695344/LOC115706264/LOC115706748/LOC115705197/LOC115706139/LOC115708273/LOC115705873/LOC115708306/LOC115705497/LOC115705625/LOC115705699/LOC115705767/LOC115708113/LOC115706875/LOC115706876/LOC115707364/LOC115707118/LOC115707231/LOC115707697/LOC115707916/LOC115708…	107
721	H3K56ac	GO:0009415	response to water	132/8108	215/15562	0.00356718	0.0246168	0.0183794	LOC115702661/LOC115702773/LOC115702862/LOC115702924/LOC115702951/LOC115703078/LOC115703234/LOC115707089/LOC115702461/LOC115712195/LOC115712694/LOC115724355/LOC115697431/LOC115707451/LOC115707742/LOC115706110/LOC115706045/LOC115705123/LOC115706206/LOC115705192/LOC115704794/LOC115706176/LOC115706478/LOC115705788/LOC115706004/LOC115706104/LOC115706197/LOC115706485/LOC115707364/LOC115707411/LOC115705…	132
722	H3K56ac	GO:0018198	peptidyl-cysteine modification	22/8108	28/15562	0.003626	0.0249455	0.0186248	LOC115702642/LOC115708202/LOC115705836/LOC115707764/LOC115708159/LOC115705954/LOC115706335/LOC115709112/LOC115712379/LOC115717604/LOC115718640/LOC115719529/LOC115722324/LOC115721743/LOC115722704/LOC115694722/LOC115725452/LOC115701348/LOC115699410/LOC115699481/LOC115699061/LOC115699151	22
723	H3K56ac	GO:0045934	negative regulation of nucleobase-containing compound metabolic process	137/8108	224/15562	0.00370027	0.0252456	0.0188488	LOC115702592/LOC115704488/LOC115702766/LOC115702813/LOC115703078/LOC115705387/LOC115707433/LOC115695222/LOC115702759/LOC115702778/LOC115703697/LOC115704745/LOC115704249/LOC115706453/LOC115709095/LOC115710310/LOC115711694/LOC115712195/LOC115714021/LOC115722563/LOC115697325/LOC115697752/LOC115698748/LOC115699021/LOC115700469/LOC115700622/LOC115701871/LOC115702261/LOC115705510/LOC115704901/LOC115705…	137
724	H3K56ac	GO:0006289	nucleotide-excision repair	34/8108	47/15562	0.00370292	0.0252456	0.0188488	LOC115703047/LOC115703544/LOC115709802/LOC115707602/LOC115705507/LOC115705579/LOC115705676/LOC115708197/LOC115707872/LOC115707874/LOC115710048/LOC115709669/LOC115710081/LOC115713928/LOC115712866/LOC115717036/LOC115716897/LOC115716894/LOC115718408/LOC115720820/LOC115720780/LOC115719699/LOC115719754/LOC115723076/LOC115723156/LOC115695706/LOC115724469/LOC115724836/LOC115725017/LOC115698094/LOC115698…	34
725	H3K56ac	GO:0015980	energy derivation by oxidation of organic compounds	81/8108	126/15562	0.00370359	0.0252456	0.0188488	LOC115715861/LOC115702598/LOC115707193/LOC115713017/LOC115713840/LOC115705995/LOC115705520/LOC115705936/LOC115706014/LOC115708218/LOC115708333/LOC115707703/LOC115705347/LOC115707882/LOC115708090/LOC115709871/LOC115709252/LOC115709838/LOC115709312/LOC115710297/LOC115709946/LOC115711248/LOC115711521/LOC115709675/LOC115714371/LOC115712584/LOC115714294/LOC115713940/LOC115713926/LOC115712333/LOC115713…	81
726	H3K56ac	GO:0009127	purine nucleoside monophosphate biosynthetic process	20/8108	25/15562	0.00381286	0.0258324	0.0192869	LOC115708073/LOC115712548/LOC115713640/LOC115706092/LOC115705417/LOC115707550/LOC115709550/LOC115709549/LOC115712679/LOC115714115/LOC115712684/LOC115716946/LOC115716800/LOC115717339/LOC115716107/LOC115719673/LOC115722392/LOC115725389/LOC115697031/LOC115697679	20
727	H3K56ac	GO:0009168	purine ribonucleoside monophosphate biosynthetic process	20/8108	25/15562	0.00381286	0.0258324	0.0192869	LOC115708073/LOC115712548/LOC115713640/LOC115706092/LOC115705417/LOC115707550/LOC115709550/LOC115709549/LOC115712679/LOC115714115/LOC115712684/LOC115716946/LOC115716800/LOC115717339/LOC115716107/LOC115719673/LOC115722392/LOC115725389/LOC115697031/LOC115697679	20
728	H3K56ac	GO:0009414	response to water deprivation	129/8108	210/15562	0.00382939	0.0258658	0.0193118	LOC115702661/LOC115702773/LOC115702862/LOC115702924/LOC115702951/LOC115703078/LOC115703234/LOC115707089/LOC115702461/LOC115712195/LOC115712694/LOC115724355/LOC115697431/LOC115707451/LOC115707742/LOC115706110/LOC115706045/LOC115705123/LOC115706206/LOC115705192/LOC115704794/LOC115706176/LOC115706478/LOC115705788/LOC115706004/LOC115706104/LOC115706197/LOC115706485/LOC115707364/LOC115707411/LOC115705…	129
729	H3K56ac	GO:0006476	protein deacetylation	18/8108	22/15562	0.00389427	0.0261456	0.0195208	LOC115702766/LOC115702813/LOC115703044/LOC115707169/LOC115714021/LOC115699021/LOC115706726/LOC115707945/LOC115710180/LOC115711643/LOC115709622/LOC115714802/LOC115712908/LOC115719134/LOC115719367/LOC115719105/LOC115719643/LOC115695686	18
730	H3K56ac	GO:0043248	proteasome assembly	18/8108	22/15562	0.00389427	0.0261456	0.0195208	LOC115702658/LOC115703189/LOC115709964/LOC115709632/LOC115710178/LOC115715219/LOC115712662/LOC115714312/LOC115716325/LOC115716203/LOC115719790/LOC115720608/LOC115720957/LOC115695921/LOC115697751/LOC115700847/LOC115699406/LOC115701005	18
731	H3K56ac	GO:0051726	regulation of cell cycle	147/8108	242/15562	0.00392561	0.0262359	0.0195882	LOC115702731/LOC115703082/LOC115703195/LOC115703080/LOC115703688/LOC115708686/LOC115711061/LOC115722563/LOC115699147/LOC115699911/LOC115700312/LOC115700579/LOC115701871/LOC115702314/LOC115702316/LOC115706060/LOC115705653/LOC115708228/LOC115706681/LOC115707955/LOC115706082/LOC115704072/LOC115704754/LOC115704365/LOC115705665/LOC115705913/LOC115705950/LOC115706373/LOC115706379/LOC115706898/LOC115707…	147
732	H3K56ac	GO:0006790	sulfur compound metabolic process	170/8108	283/15562	0.00393126	0.0262359	0.0195882	LOC115702618/LOC115702783/LOC115702896/LOC115702924/LOC115703014/LOC115703094/LOC115708837/LOC115710389/LOC115713573/LOC115715228/LOC115696485/LOC115698051/LOC115703995/LOC115707000/LOC115710018/LOC115711694/LOC115711722/LOC115712842/LOC115699010/LOC115700246/LOC115701777/LOC115701871/LOC115705080/LOC115706332/LOC115705658/LOC115706703/LOC115706566/LOC115706479/LOC115705662/LOC115703573/LOC115708…	170
733	H3K56ac	GO:0080135	regulation of cellular response to stress	37/8108	52/15562	0.00398093	0.0264881	0.0197764	LOC115703195/LOC115703620/LOC115705615/LOC115700255/LOC115705628/LOC115705161/LOC115705569/LOC115708698/LOC115709686/LOC115709770/LOC115709746/LOC115709043/LOC115710064/LOC115712701/LOC115712237/LOC115714672/LOC115715083/LOC115715173/LOC115714846/LOC115712826/LOC115715118/LOC115717036/LOC115715625/LOC115715575/LOC115716474/LOC115721312/LOC115718407/LOC115721132/LOC115719682/LOC115721757/LOC115723…	37
734	H3K56ac	GO:0009141	nucleoside triphosphate metabolic process	40/8108	57/15562	0.00416827	0.027652	0.0206455	LOC115703193/LOC115704957/LOC115705607/LOC115708064/LOC115709698/LOC115710101/LOC115702325/LOC115702361/LOC115707664/LOC115705524/LOC115705183/LOC115708106/LOC115707173/LOC115707115/LOC115707116/LOC115705347/LOC115707949/LOC115709744/LOC115709134/LOC115709278/LOC115713924/LOC115714371/LOC115714255/LOC115715167/LOC115716105/LOC115716183/LOC115724129/LOC115724184/LOC115725156/LOC115724574/LOC115695…	40
735	H3K56ac	GO:0051028	mRNA transport	32/8108	44/15562	0.00421459	0.0277939	0.0207514	LOC115702808/LOC115705296/LOC115712441/LOC115705580/LOC115705095/LOC115705463/LOC115705449/LOC115708273/LOC115708306/LOC115707125/LOC115707903/LOC115709632/LOC115712749/LOC115715219/LOC115714995/LOC115714210/LOC115714817/LOC115711981/LOC115714570/LOC115717749/LOC115716396/LOC115715599/LOC115720866/LOC115722220/LOC115721800/LOC115724445/LOC115724650/LOC115695830/LOC115725381/LOC115724961/LOC115701…	32
736	H3K56ac	GO:0071367	cellular response to brassinosteroid stimulus	32/8108	44/15562	0.00421459	0.0277939	0.0207514	LOC115722899/LOC115720050/LOC115702467/LOC115712441/LOC115713972/LOC115700469/LOC115708164/LOC115706523/LOC115709598/LOC115711536/LOC115710209/LOC115714993/LOC115715238/LOC115712674/LOC115717645/LOC115715983/LOC115716204/LOC115717124/LOC115717323/LOC115715972/LOC115715971/LOC115721039/LOC115719192/LOC115721183/LOC115696908/LOC115697346/LOC115697642/LOC115697851/LOC115698697/LOC115699643/LOC115699…	32
737	H3K56ac	GO:1901605	alpha-amino acid metabolic process	172/8108	287/15562	0.00427766	0.0280527	0.0209447	LOC115702620/LOC115702618/LOC115702629/LOC115702859/LOC115702934/LOC115702935/LOC115702968/LOC115702972/LOC115703006/LOC115703014/LOC115703195/LOC115703222/LOC115713573/LOC115715228/LOC115718543/LOC115703995/LOC115704012/LOC115704142/LOC115706428/LOC115707082/LOC115708064/LOC115708896/LOC115710665/LOC115710723/LOC115711146/LOC115712735/LOC115714249/LOC115697888/LOC115699010/LOC115699837/LOC115706…	172
738	H3K56ac	GO:0007033	vacuole organization	43/8108	62/15562	0.00427902	0.0280527	0.0209447	LOC115702917/LOC115718167/LOC115706458/LOC115706355/LOC115705781/LOC115706151/LOC115706166/LOC115707180/LOC115707204/LOC115707408/LOC115707830/LOC115709922/LOC115710151/LOC115709404/LOC115709432/LOC115709279/LOC115708998/LOC115709400/LOC115715190/LOC115712809/LOC115713047/LOC115712807/LOC115714295/LOC115713962/LOC115714991/LOC115714395/LOC115716818/LOC115716619/LOC115718988/LOC115719509/LOC115719…	43
739	H3K56ac	GO:0080134	regulation of response to stress	132/8108	216/15562	0.00450214	0.029429	0.0219722	LOC115702773/LOC115703195/LOC115722899/LOC115710935/LOC115703620/LOC115705210/LOC115705615/LOC115707089/LOC115711315/LOC115717510/LOC115722139/LOC115699277/LOC115699852/LOC115700255/LOC115705628/LOC115705509/LOC115705161/LOC115705547/LOC115705569/LOC115705155/LOC115705512/LOC115705551/LOC115705951/LOC115706104/LOC115706624/LOC115708302/LOC115705275/LOC115707903/LOC115707926/LOC115708698/LOC115708…	132
740	H3K56ac	GO:0006402	mRNA catabolic process	69/8108	106/15562	0.00453799	0.0295765	0.0220824	LOC115702736/LOC115703195/LOC115696485/LOC115703071/LOC115703104/LOC115703796/LOC115704249/LOC115709368/LOC115695344/LOC115706264/LOC115706748/LOC115705197/LOC115706139/LOC115708273/LOC115708306/LOC115705625/LOC115708113/LOC115707364/LOC115707118/LOC115707231/LOC115707916/LOC115709390/LOC115709250/LOC115709629/LOC115709394/LOC115715098/LOC115711981/LOC115714228/LOC115714174/LOC115712917/LOC115716…	69
741	H3K56ac	GO:0045787	positive regulation of cell cycle	30/8108	41/15562	0.00478598	0.030948	0.0231063	LOC115703080/LOC115699147/LOC115699911/LOC115700579/LOC115705653/LOC115706082/LOC115705665/LOC115706898/LOC115709353/LOC115714012/LOC115715173/LOC115713887/LOC115719558/LOC115718402/LOC115724098/LOC115723078/LOC115724469/LOC115694713/LOC115725590/LOC115697930/LOC115696949/LOC115697419/LOC115697539/LOC115700820/LOC115698551/LOC115701568/LOC115698751/LOC115699264/LOC115701496/LOC115700508	30
742	H3K56ac	GO:0046496	nicotinamide nucleotide metabolic process	2008-11-01	12/15562	0.00480138	0.030948	0.0231063	LOC115699417/LOC115709838/LOC115712341/LOC115712962/LOC115714176/LOC115719648/LOC115719494/LOC115722630/LOC115724535/LOC115724953/LOC115701052	11
743	H3K56ac	GO:0048194	Golgi vesicle budding	2008-11-01	12/15562	0.00480138	0.030948	0.0231063	LOC115713633/LOC115713350/LOC115707025/LOC115711242/LOC115714800/LOC115716193/LOC115716017/LOC115719464/LOC115724109/LOC115722805/LOC115700553	11
744	H3K56ac	GO:1902275	regulation of chromatin organization	38/8108	54/15562	0.00480395	0.030948	0.0231063	LOC115703121/LOC115704038/LOC115697752/LOC115706726/LOC115707487/LOC115705214/LOC115705155/LOC115707295/LOC115708673/LOC115709770/LOC115709746/LOC115714491/LOC115712505/LOC115712648/LOC115712237/LOC115712826/LOC115712512/LOC115715214/LOC115715118/LOC115713887/LOC115719702/LOC115719035/LOC115719566/LOC115719755/LOC115721312/LOC115721031/LOC115719460/LOC115719643/LOC115722268/LOC115695832/LOC115725…	38
745	H3K56ac	GO:0051168	nuclear export	41/8108	59/15562	0.00494571	0.0317694	0.0237196	LOC115702808/LOC115705296/LOC115707318/LOC115712334/LOC115705580/LOC115705095/LOC115705463/LOC115708273/LOC115708306/LOC115705641/LOC115707096/LOC115707125/LOC115708074/LOC115709632/LOC115709152/LOC115712749/LOC115715219/LOC115714995/LOC115714210/LOC115711981/LOC115715174/LOC115717214/LOC115717749/LOC115716396/LOC115719635/LOC115719167/LOC115719003/LOC115722220/LOC115722564/LOC115721800/LOC115724…	41
746	H3K56ac	GO:0007006	mitochondrial membrane organization	23/8108	30/15562	0.00510477	0.0325101	0.0242726	LOC115702923/LOC115699346/LOC115705865/LOC115709922/LOC115714976/LOC115712611/LOC115716627/LOC115715734/LOC115717977/LOC115716410/LOC115721139/LOC115720973/LOC115721380/LOC115721156/LOC115719610/LOC115718942/LOC115719193/LOC115721298/LOC115695636/LOC115725406/LOC115699591/LOC115699013/LOC115701113	23
747	H3K56ac	GO:0010017	red or far-red light signaling pathway	23/8108	30/15562	0.00510477	0.0325101	0.0242726	LOC115702819/LOC115695661/LOC115695269/LOC115695743/LOC115710101/LOC115700135/LOC115706248/LOC115705128/LOC115707394/LOC115714721/LOC115712353/LOC115716057/LOC115719277/LOC115721719/LOC115721945/LOC115695963/LOC115697505/LOC115698130/LOC115697192/LOC115699078/LOC115699438/LOC115700997/LOC115699450	23
748	H3K56ac	GO:0070897	transcription preinitiation complex assembly	23/8108	30/15562	0.00510477	0.0325101	0.0242726	LOC115701199/LOC115707202/LOC115706196/LOC115707024/LOC115707069/LOC115707206/LOC115707402/LOC115707539/LOC115709767/LOC115709742/LOC115709913/LOC115714412/LOC115717035/LOC115716110/LOC115720806/LOC115719601/LOC115718997/LOC115720793/LOC115719076/LOC115722931/LOC115724516/LOC115725232/LOC115697803	23
749	H3K56ac	GO:0006563	L-serine metabolic process	28/8108	38/15562	0.00541886	0.0341204	0.0254749	LOC115702620/LOC115702618/LOC115702629/LOC115702972/LOC115703006/LOC115703195/LOC115711146/LOC115699010/LOC115706332/LOC115705658/LOC115706566/LOC115705662/LOC115703573/LOC115707895/LOC115708041/LOC115712615/LOC115716122/LOC115719520/LOC115719688/LOC115722401/LOC115723457/LOC115722834/LOC115721776/LOC115695912/LOC115725485/LOC115695931/LOC115697435/LOC115697846	28
750	H3K56ac	GO:0016226	iron-sulfur cluster assembly	28/8108	38/15562	0.00541886	0.0341204	0.0254749	LOC115708837/LOC115710389/LOC115705797/LOC115707533/LOC115707773/LOC115709838/LOC115710000/LOC115714740/LOC115714904/LOC115715246/LOC115712220/LOC115714468/LOC115714820/LOC115714033/LOC115717197/LOC115716726/LOC115716089/LOC115719181/LOC115720736/LOC115721340/LOC115720966/LOC115722875/LOC115724470/LOC115699519/LOC115700722/LOC115699477/LOC115698556/LOC115699560	28
751	H3K56ac	GO:0031163	metallo-sulfur cluster assembly	28/8108	38/15562	0.00541886	0.0341204	0.0254749	LOC115708837/LOC115710389/LOC115705797/LOC115707533/LOC115707773/LOC115709838/LOC115710000/LOC115714740/LOC115714904/LOC115715246/LOC115712220/LOC115714468/LOC115714820/LOC115714033/LOC115717197/LOC115716726/LOC115716089/LOC115719181/LOC115720736/LOC115721340/LOC115720966/LOC115722875/LOC115724470/LOC115699519/LOC115700722/LOC115699477/LOC115698556/LOC115699560	28
752	H3K56ac	GO:0060341	regulation of cellular localization	28/8108	38/15562	0.00541886	0.0341204	0.0254749	LOC115704956/LOC115703223/LOC115707648/LOC115704658/LOC115708096/LOC115707687/LOC115707553/LOC115707910/LOC115709316/LOC115709043/LOC115709760/LOC115717214/LOC115715625/LOC115715575/LOC115716017/LOC115719635/LOC115718403/LOC115720636/LOC115722179/LOC115722180/LOC115725139/LOC115696864/LOC115701191/LOC115698946/LOC115699033/LOC115699643/LOC115700800/LOC115698551	28
753	H3K56ac	GO:0009070	serine family amino acid biosynthetic process	36/8108	51/15562	0.00553543	0.0346874	0.0258982	LOC115702620/LOC115702618/LOC115702629/LOC115702972/LOC115703006/LOC115703195/LOC115715228/LOC115711146/LOC115699010/LOC115706332/LOC115705658/LOC115706566/LOC115705662/LOC115703573/LOC115707895/LOC115707749/LOC115708041/LOC115712615/LOC115712098/LOC115715268/LOC115714998/LOC115716122/LOC115721145/LOC115719520/LOC115719688/LOC115722401/LOC115723457/LOC115722834/LOC115721776/LOC115724053/LOC115695…	36
754	H3K56ac	GO:0032786	positive regulation of DNA-templated transcription, elongation	21/8108	27/15562	0.00555558	0.0346874	0.0258982	LOC115708686/LOC115706379/LOC115707352/LOC115707373/LOC115708814/LOC115712778/LOC115713009/LOC115718958/LOC115721359/LOC115718626/LOC115718725/LOC115724098/LOC115722570/LOC115721763/LOC115723135/LOC115723078/LOC115694713/LOC115725381/LOC115724961/LOC115698749/LOC115699581	21
755	H3K56ac	GO:2001020	regulation of response to DNA damage stimulus	21/8108	27/15562	0.00555558	0.0346874	0.0258982	LOC115703195/LOC115705615/LOC115708698/LOC115709686/LOC115709770/LOC115709746/LOC115709043/LOC115710064/LOC115715173/LOC115712826/LOC115715118/LOC115717036/LOC115715625/LOC115715575/LOC115716474/LOC115721312/LOC115718407/LOC115721757/LOC115694677/LOC115701439/LOC115698625	21
756	H3K56ac	GO:0000966	RNA 5'-end processing	13/8108	15/15562	0.00583988	0.0356633	0.0266268	LOC115704878/LOC115708289/LOC115705783/LOC115708328/LOC115716650/LOC115716898/LOC115720881/LOC115694765/LOC115696905/LOC115700468/LOC115700470/LOC115699264/LOC115700716	13
757	H3K56ac	GO:0006551	leucine metabolic process	13/8108	15/15562	0.00583988	0.0356633	0.0266268	LOC115702935/LOC115704012/LOC115712735/LOC115717084/LOC115715790/LOC115716705/LOC115719519/LOC115719140/LOC115722271/LOC115722915/LOC115722254/LOC115700937/LOC115698941	13
758	H3K56ac	GO:0031365	N-terminal protein amino acid modification	13/8108	15/15562	0.00583988	0.0356633	0.0266268	LOC115703744/LOC115705986/LOC115707577/LOC115706413/LOC115705327/LOC115709990/LOC115714902/LOC115719641/LOC115721790/LOC115722215/LOC115724836/LOC115696213/LOC115699322	13
759	H3K56ac	GO:0034471	ncRNA 5'-end processing	13/8108	15/15562	0.00583988	0.0356633	0.0266268	LOC115704878/LOC115708289/LOC115705783/LOC115708328/LOC115716650/LOC115716898/LOC115720881/LOC115694765/LOC115696905/LOC115700468/LOC115700470/LOC115699264/LOC115700716	13
760	H3K56ac	GO:0046513	ceramide biosynthetic process	13/8108	15/15562	0.00583988	0.0356633	0.0266268	LOC115702927/LOC115706555/LOC115709151/LOC115706029/LOC115706612/LOC115705557/LOC115709662/LOC115717316/LOC115718761/LOC115722810/LOC115697449/LOC115699743/LOC115699661	13
761	H3K56ac	GO:0060260	regulation of transcription initiation by RNA polymerase II	13/8108	15/15562	0.00583988	0.0356633	0.0266268	LOC115701199/LOC115705576/LOC115706196/LOC115707206/LOC115707402/LOC115707539/LOC115715157/LOC115716110/LOC115717337/LOC115719601/LOC115718997/LOC115719076/LOC115725232	13
762	H3K56ac	GO:0060261	positive regulation of transcription initiation by RNA polymerase II	13/8108	15/15562	0.00583988	0.0356633	0.0266268	LOC115701199/LOC115705576/LOC115706196/LOC115707206/LOC115707402/LOC115707539/LOC115715157/LOC115716110/LOC115717337/LOC115719601/LOC115718997/LOC115719076/LOC115725232	13
763	H3K56ac	GO:2000144	positive regulation of DNA-templated transcription initiation	13/8108	15/15562	0.00583988	0.0356633	0.0266268	LOC115701199/LOC115705576/LOC115706196/LOC115707206/LOC115707402/LOC115707539/LOC115715157/LOC115716110/LOC115717337/LOC115719601/LOC115718997/LOC115719076/LOC115725232	13
764	H3K56ac	GO:0019725	cellular homeostasis	133/8108	219/15562	0.00592933	0.0361077	0.0269587	LOC115702748/LOC115702840/LOC115703028/LOC115702953/LOC115703009/LOC115703159/LOC115722899/LOC115712199/LOC115705652/LOC115706027/LOC115709121/LOC115709151/LOC115710743/LOC115713788/LOC115714328/LOC115722139/LOC115698883/LOC115699671/LOC115700067/LOC115700197/LOC115700416/LOC115696683/LOC115701945/LOC115703831/LOC115704015/LOC115706064/LOC115705714/LOC115706867/LOC115706612/LOC115703609/LOC115705…	133
765	H3K56ac	GO:0090151	establishment of protein localization to mitochondrial membrane	19/8108	24/15562	0.00594506	0.0361077	0.0269587	LOC115702923/LOC115699346/LOC115705865/LOC115714976/LOC115716627/LOC115715734/LOC115717977/LOC115716410/LOC115721139/LOC115720973/LOC115721380/LOC115719610/LOC115718942/LOC115719193/LOC115721298/LOC115695636/LOC115699591/LOC115699013/LOC115701113	19
766	H3K56ac	GO:0046835	carbohydrate phosphorylation	31/8108	43/15562	0.00598975	0.0362803	0.0270875	LOC115709914/LOC115711637/LOC115700263/LOC115701945/LOC115707743/LOC115705825/LOC115706706/LOC115707188/LOC115707400/LOC115707547/LOC115709262/LOC115710566/LOC115712013/LOC115715147/LOC115717441/LOC115717182/LOC115716775/LOC115717236/LOC115716459/LOC115718791/LOC115720624/LOC115723314/LOC115722867/LOC115722918/LOC115723147/LOC115722911/LOC115694724/LOC115697095/LOC115697216/LOC115699696/LOC115699…	31
767	H3K56ac	GO:0045892	negative regulation of DNA-templated transcription	99/8108	159/15562	0.00601269	0.0363205	0.0271176	LOC115702592/LOC115704488/LOC115702813/LOC115703078/LOC115707433/LOC115702759/LOC115702778/LOC115704745/LOC115706453/LOC115709095/LOC115710310/LOC115711694/LOC115712195/LOC115714021/LOC115697325/LOC115698748/LOC115699021/LOC115700469/LOC115700622/LOC115701871/LOC115702261/LOC115705510/LOC115704901/LOC115705128/LOC115706726/LOC115705894/LOC115707074/LOC115704707/LOC115705490/LOC115705637/LOC115708…	99
768	H3K56ac	GO:0016575	histone deacetylation	17/8108	21/15562	0.00620465	0.0371044	0.0277028	LOC115702766/LOC115702813/LOC115703044/LOC115707169/LOC115714021/LOC115699021/LOC115706726/LOC115707945/LOC115710180/LOC115711643/LOC115709622/LOC115712908/LOC115719134/LOC115719367/LOC115719105/LOC115719643/LOC115695686	17
769	H3K56ac	GO:0030042	actin filament depolymerization	17/8108	21/15562	0.00620465	0.0371044	0.0277028	LOC115702674/LOC115702784/LOC115702799/LOC115704651/LOC115712375/LOC115712383/LOC115724500/LOC115704024/LOC115706539/LOC115709883/LOC115711537/LOC115709962/LOC115710014/LOC115714208/LOC115717561/LOC115716654/LOC115718638	17
770	H3K56ac	GO:0043631	RNA polyadenylation	17/8108	21/15562	0.00620465	0.0371044	0.0277028	LOC115702617/LOC115704488/LOC115712646/LOC115724500/LOC115699992/LOC115705625/LOC115705730/LOC115709390/LOC115711551/LOC115716882/LOC115716829/LOC115722109/LOC115722256/LOC115695832/LOC115725472/LOC115699674/LOC115698518	17
771	H3K56ac	GO:0000245	spliceosomal complex assembly	15/8108	18/15562	0.00622568	0.0371044	0.0277028	LOC115702599/LOC115706049/LOC115704987/LOC115707363/LOC115709906/LOC115709444/LOC115709457/LOC115714394/LOC115716719/LOC115719092/LOC115720762/LOC115723141/LOC115695834/LOC115697535/LOC115698875	15
772	H3K56ac	GO:0051348	negative regulation of transferase activity	15/8108	18/15562	0.00622568	0.0371044	0.0277028	LOC115703000/LOC115698890/LOC115715318/LOC115705210/LOC115709581/LOC115714672/LOC115714141/LOC115714068/LOC115714739/LOC115718606/LOC115719518/LOC115722602/LOC115723039/LOC115725269/LOC115699615	15
773	H3K56ac	GO:0030490	maturation of SSU-rRNA	34/8108	48/15562	0.00637635	0.037901	0.0282976	LOC115702948/LOC115705135/LOC115705943/LOC115707739/LOC115705252/LOC115708027/LOC115710297/LOC115709420/LOC115714823/LOC115712976/LOC115714247/LOC115716770/LOC115716650/LOC115716774/LOC115720655/LOC115721168/LOC115719675/LOC115722452/LOC115722941/LOC115723138/LOC115695946/LOC115725129/LOC115725370/LOC115695721/LOC115725582/LOC115725365/LOC115697840/LOC115701177/LOC115701330/LOC115700663/LOC115699…	34
774	H3K56ac	GO:0008652	cellular amino acid biosynthetic process	126/8108	207/15562	0.00652805	0.0386995	0.0288937	LOC115702620/LOC115702618/LOC115702629/LOC115702672/LOC115702972/LOC115703006/LOC115703014/LOC115703195/LOC115703222/LOC115715228/LOC115718543/LOC115703995/LOC115704142/LOC115709638/LOC115710665/LOC115710723/LOC115711146/LOC115712735/LOC115697820/LOC115699010/LOC115705168/LOC115706741/LOC115706332/LOC115705658/LOC115706566/LOC115706479/LOC115705050/LOC115706623/LOC115703598/LOC115705662/LOC115703…	126
775	H3K56ac	GO:0045814	negative regulation of gene expression, epigenetic	46/8108	68/15562	0.00667168	0.0394461	0.0294511	LOC115702592/LOC115703251/LOC115707433/LOC115702759/LOC115702778/LOC115706453/LOC115709095/LOC115711694/LOC115697325/LOC115699021/LOC115702261/LOC115705637/LOC115706114/LOC115706711/LOC115709205/LOC115709204/LOC115709206/LOC115709629/LOC115709770/LOC115709746/LOC115708999/LOC115709402/LOC115712505/LOC115712237/LOC115717183/LOC115717005/LOC115716939/LOC115716551/LOC115720867/LOC115721344/LOC115722…	46
776	H3K56ac	GO:0033014	tetrapyrrole biosynthetic process	43/8108	63/15562	0.00673426	0.0395883	0.0295574	LOC115713909/LOC115722977/LOC115705600/LOC115707610/LOC115707736/LOC115695131/LOC115695173/LOC115695432/LOC115697431/LOC115706149/LOC115706229/LOC115706234/LOC115706819/LOC115708039/LOC115710263/LOC115709045/LOC115711257/LOC115711605/LOC115709985/LOC115710087/LOC115714382/LOC115716460/LOC115719517/LOC115719658/LOC115718586/LOC115719351/LOC115720123/LOC115724161/LOC115722576/LOC115722324/LOC115724…	43
777	H3K56ac	GO:1902679	negative regulation of RNA biosynthetic process	105/8108	170/15562	0.00674902	0.0395883	0.0295574	LOC115702592/LOC115704488/LOC115702766/LOC115702813/LOC115703078/LOC115707433/LOC115695222/LOC115702759/LOC115702778/LOC115704745/LOC115706453/LOC115709095/LOC115710310/LOC115711694/LOC115712195/LOC115714021/LOC115697325/LOC115698748/LOC115699021/LOC115700469/LOC115700622/LOC115701871/LOC115702261/LOC115705510/LOC115704901/LOC115705128/LOC115706726/LOC115705894/LOC115707074/LOC115704707/LOC115705…	105
778	H3K56ac	GO:1903507	negative regulation of nucleic acid-templated transcription	105/8108	170/15562	0.00674902	0.0395883	0.0295574	LOC115702592/LOC115704488/LOC115702766/LOC115702813/LOC115703078/LOC115707433/LOC115695222/LOC115702759/LOC115702778/LOC115704745/LOC115706453/LOC115709095/LOC115710310/LOC115711694/LOC115712195/LOC115714021/LOC115697325/LOC115698748/LOC115699021/LOC115700469/LOC115700622/LOC115701871/LOC115702261/LOC115705510/LOC115704901/LOC115705128/LOC115706726/LOC115705894/LOC115707074/LOC115704707/LOC115705…	105
779	H3K56ac	GO:0006623	protein targeting to vacuole	29/8108	40/15562	0.0068453	0.0399173	0.0298029	LOC115703086/LOC115703087/LOC115697285/LOC115707485/LOC115707165/LOC115705150/LOC115705223/LOC115707170/LOC115706458/LOC115705781/LOC115706166/LOC115707542/LOC115710138/LOC115709432/LOC115714144/LOC115712662/LOC115714209/LOC115715105/LOC115716110/LOC115716091/LOC115719462/LOC115722428/LOC115724067/LOC115723394/LOC115698299/LOC115697734/LOC115700904/LOC115700842/LOC115701227	29
780	H3K56ac	GO:0032784	regulation of DNA-templated transcription elongation	24/8108	32/15562	0.00685882	0.0399173	0.0298029	LOC115708686/LOC115710634/LOC115705095/LOC115705998/LOC115706379/LOC115707352/LOC115707373/LOC115708814/LOC115712778/LOC115713009/LOC115718958/LOC115721359/LOC115718626/LOC115718725/LOC115724098/LOC115722570/LOC115721763/LOC115723135/LOC115723078/LOC115694713/LOC115725381/LOC115724961/LOC115698749/LOC115699581	24
781	H3K56ac	GO:0051261	protein depolymerization	24/8108	32/15562	0.00685882	0.0399173	0.0298029	LOC115702674/LOC115702784/LOC115702799/LOC115704651/LOC115712375/LOC115712383/LOC115724500/LOC115699818/LOC115704024/LOC115706539/LOC115709883/LOC115711537/LOC115709962/LOC115710014/LOC115714084/LOC115714393/LOC115713918/LOC115714208/LOC115717561/LOC115716654/LOC115718638/LOC115722267/LOC115697424/LOC115697882	24
782	H3K56ac	GO:0006631	fatty acid metabolic process	142/8108	236/15562	0.00728041	0.0422605	0.0315524	LOC115702591/LOC115702927/LOC115703179/LOC115703195/LOC115703234/LOC115710077/LOC115723066/LOC115703721/LOC115705664/LOC115705741/LOC115706299/LOC115709512/LOC115710753/LOC115711315/LOC115712074/LOC115699277/LOC115700382/LOC115700844/LOC115702037/LOC115702253/LOC115705594/LOC115705717/LOC115708301/LOC115708299/LOC115706394/LOC115706393/LOC115706391/LOC115705186/LOC115706065/LOC115706259/LOC115706…	142
783	H3K56ac	GO:1901607	alpha-amino acid biosynthetic process	107/8108	174/15562	0.00757749	0.043805	0.0327056	LOC115702620/LOC115702618/LOC115702629/LOC115702972/LOC115703006/LOC115703014/LOC115703195/LOC115703222/LOC115715228/LOC115718543/LOC115703995/LOC115704142/LOC115710723/LOC115711146/LOC115712735/LOC115699010/LOC115705168/LOC115706332/LOC115705658/LOC115706566/LOC115706479/LOC115705050/LOC115706623/LOC115703598/LOC115705662/LOC115703573/LOC115706054/LOC115705496/LOC115706293/LOC115706363/LOC115707…	107
784	H3K56ac	GO:0072527	pyrimidine-containing compound metabolic process	47/8108	70/15562	0.00760472	0.043805	0.0327056	LOC115703157/LOC115709998/LOC115696485/LOC115698051/LOC115708064/LOC115710101/LOC115710877/LOC115706703/LOC115705524/LOC115705873/LOC115707803/LOC115705751/LOC115707173/LOC115707115/LOC115707116/LOC115707375/LOC115704571/LOC115709556/LOC115709792/LOC115709025/LOC115709908/LOC115709893/LOC115711604/LOC115714531/LOC115714977/LOC115714382/LOC115712420/LOC115714306/LOC115715167/LOC115716105/LOC115716…	47
785	H3K56ac	GO:0010038	response to metal ion	143/8108	238/15562	0.00760544	0.043805	0.0327056	LOC115702620/LOC115702629/LOC115702853/LOC115702854/LOC115702913/LOC115703137/LOC115703190/LOC115707082/LOC115709724/LOC115710185/LOC115710310/LOC115710860/LOC115712056/LOC115712334/LOC115713640/LOC115697690/LOC115698731/LOC115699010/LOC115699837/LOC115700255/LOC115703671/LOC115706606/LOC115704024/LOC115706732/LOC115705524/LOC115705230/LOC115705569/LOC115706867/LOC115703609/LOC115704770/LOC115706…	143
786	H3K56ac	GO:0033865	nucleoside bisphosphate metabolic process	38/8108	55/15562	0.00779005	0.0444355	0.0331763	LOC115702783/LOC115702836/LOC115702850/LOC115724952/LOC115707610/LOC115710480/LOC115711722/LOC115705163/LOC115708323/LOC115705116/LOC115705496/LOC115705753/LOC115706093/LOC115706516/LOC115707018/LOC115707697/LOC115709689/LOC115715254/LOC115712632/LOC115712810/LOC115712627/LOC115712880/LOC115716364/LOC115716624/LOC115716237/LOC115716323/LOC115719471/LOC115722730/LOC115722255/LOC115695914/LOC115698…	38
787	H3K56ac	GO:0033875	ribonucleoside bisphosphate metabolic process	38/8108	55/15562	0.00779005	0.0444355	0.0331763	LOC115702783/LOC115702836/LOC115702850/LOC115724952/LOC115707610/LOC115710480/LOC115711722/LOC115705163/LOC115708323/LOC115705116/LOC115705496/LOC115705753/LOC115706093/LOC115706516/LOC115707018/LOC115707697/LOC115709689/LOC115715254/LOC115712632/LOC115712810/LOC115712627/LOC115712880/LOC115716364/LOC115716624/LOC115716237/LOC115716323/LOC115719471/LOC115722730/LOC115722255/LOC115695914/LOC115698…	38
788	H3K56ac	GO:0034032	purine nucleoside bisphosphate metabolic process	38/8108	55/15562	0.00779005	0.0444355	0.0331763	LOC115702783/LOC115702836/LOC115702850/LOC115724952/LOC115707610/LOC115710480/LOC115711722/LOC115705163/LOC115708323/LOC115705116/LOC115705496/LOC115705753/LOC115706093/LOC115706516/LOC115707018/LOC115707697/LOC115709689/LOC115715254/LOC115712632/LOC115712810/LOC115712627/LOC115712880/LOC115716364/LOC115716624/LOC115716237/LOC115716323/LOC115719471/LOC115722730/LOC115722255/LOC115695914/LOC115698…	38
789	H3K56ac	GO:0006534	cysteine metabolic process	27/8108	37/15562	0.00780704	0.0444355	0.0331763	LOC115702618/LOC115713573/LOC115715228/LOC115706332/LOC115705658/LOC115706566/LOC115705662/LOC115703573/LOC115707895/LOC115707749/LOC115708041/LOC115709268/LOC115710211/LOC115712011/LOC115714998/LOC115719520/LOC115719688/LOC115720736/LOC115719358/LOC115723457/LOC115722834/LOC115721776/LOC115724053/LOC115695912/LOC115725485/LOC115700737/LOC115698867	27
790	H3K56ac	GO:0072528	pyrimidine-containing compound biosynthetic process	41/8108	60/15562	0.00781459	0.0444355	0.0331763	LOC115703157/LOC115709998/LOC115696485/LOC115698051/LOC115708064/LOC115710101/LOC115710877/LOC115706703/LOC115705524/LOC115707803/LOC115705751/LOC115707173/LOC115707115/LOC115707116/LOC115707375/LOC115704571/LOC115709556/LOC115709792/LOC115709908/LOC115709893/LOC115711604/LOC115714531/LOC115714977/LOC115714382/LOC115714306/LOC115716105/LOC115716183/LOC115719311/LOC115724133/LOC115723363/LOC115721…	41
791	H3K56ac	GO:0006401	RNA catabolic process	87/8108	139/15562	0.00789289	0.0447665	0.0334235	LOC115702736/LOC115702795/LOC115703195/LOC115696485/LOC115703071/LOC115703104/LOC115703796/LOC115704249/LOC115709368/LOC115695344/LOC115706264/LOC115706748/LOC115705197/LOC115706139/LOC115708273/LOC115708306/LOC115705625/LOC115705699/LOC115705767/LOC115708113/LOC115707364/LOC115707118/LOC115707231/LOC115707916/LOC115709390/LOC115709250/LOC115709629/LOC115709072/LOC115709394/LOC115715098/LOC115713…	87
792	H3K56ac	GO:0045333	cellular respiration	61/8108	94/15562	0.00811374	0.0458615	0.034241	LOC115702598/LOC115707193/LOC115713017/LOC115705995/LOC115705520/LOC115705936/LOC115706014/LOC115708218/LOC115708333/LOC115705347/LOC115707882/LOC115708090/LOC115709838/LOC115709312/LOC115710297/LOC115709946/LOC115711248/LOC115711521/LOC115714371/LOC115712584/LOC115714294/LOC115713940/LOC115714201/LOC115712229/LOC115712239/LOC115712750/LOC115712880/LOC115717706/LOC115716222/LOC115717486/LOC115716…	61
793	H3K56ac	GO:0044282	small molecule catabolic process	117/8108	192/15562	0.00812709	0.0458615	0.034241	LOC115702935/LOC115702968/LOC115713573/LOC115723066/LOC115704012/LOC115704378/LOC115706299/LOC115707082/LOC115708896/LOC115710644/LOC115714030/LOC115699010/LOC115702331/LOC115705544/LOC115706279/LOC115706202/LOC115705119/LOC115708301/LOC115708195/LOC115706866/LOC115705000/LOC115705873/LOC115705397/LOC115705496/LOC115706405/LOC115705936/LOC115706516/LOC115706832/LOC115707188/LOC115706862/LOC115707…	117
794	H3K56ac	GO:0042752	regulation of circadian rhythm	20/8108	26/15562	0.00843821	0.04701	0.0350985	LOC115702819/LOC115723387/LOC115704391/LOC115708742/LOC115706039/LOC115707308/LOC115707722/LOC115707394/LOC115712704/LOC115712353/LOC115714103/LOC115716864/LOC115721095/LOC115722085/LOC115724942/LOC115697192/LOC115699438/LOC115700997/LOC115700932/LOC115702140	20
795	H3K56ac	GO:0051983	regulation of chromosome segregation	20/8108	26/15562	0.00843821	0.04701	0.0350985	LOC115703082/LOC115699147/LOC115706060/LOC115707955/LOC115706082/LOC115704754/LOC115704365/LOC115706898/LOC115711362/LOC115709353/LOC115713293/LOC115720767/LOC115718402/LOC115721757/LOC115696864/LOC115697930/LOC115698281/LOC115701502/LOC115699664/LOC115698551	20
796	H3K56ac	GO:0046034	ATP metabolic process	88/8108	141/15562	0.00844112	0.04701	0.0350985	LOC115702897/LOC115704378/LOC115704957/LOC115705607/LOC115709698/LOC115711259/LOC115711637/LOC115723768/LOC115701945/LOC115702002/LOC115702361/LOC115705137/LOC115705136/LOC115707664/LOC115705995/LOC115705721/LOC115705183/LOC115705557/LOC115705493/LOC115708106/LOC115705825/LOC115706460/LOC115708218/LOC115707118/LOC115708333/LOC115707250/LOC115707400/LOC115707547/LOC115707565/LOC115705347/LOC115707…	88
797	H3K56ac	GO:0006189	'de novo' IMP biosynthetic process	2008-10-01	11/15562	0.00851585	0.04701	0.0350985	LOC115708073/LOC115706092/LOC115707550/LOC115709550/LOC115709549/LOC115712684/LOC115717339/LOC115716107/LOC115719673/LOC115725389	10
798	H3K56ac	GO:0016558	protein import into peroxisome matrix	2008-10-01	11/15562	0.00851585	0.04701	0.0350985	LOC115723066/LOC115706299/LOC115707486/LOC115709349/LOC115708937/LOC115711267/LOC115716095/LOC115719179/LOC115725097/LOC115697235	10
799	H3K56ac	GO:0018342	protein prenylation	2008-10-01	11/15562	0.00851585	0.04701	0.0350985	LOC115717286/LOC115705192/LOC115710206/LOC115715062/LOC115721358/LOC115722528/LOC115722947/LOC115725494/LOC115701325/LOC115701154	10
800	H3K56ac	GO:0030834	regulation of actin filament depolymerization	2008-10-01	11/15562	0.00851585	0.04701	0.0350985	LOC115702674/LOC115702784/LOC115702799/LOC115712375/LOC115712383/LOC115709883/LOC115711537/LOC115709962/LOC115710014/LOC115718638	10
801	H3K56ac	GO:0097354	prenylation	2008-10-01	11/15562	0.00851585	0.04701	0.0350985	LOC115717286/LOC115705192/LOC115710206/LOC115715062/LOC115721358/LOC115722528/LOC115722947/LOC115725494/LOC115701325/LOC115701154	10
802	H3K56ac	GO:0001510	RNA methylation	58/8108	89/15562	0.00852043	0.04701	0.0350985	LOC115703081/LOC115705920/LOC115703913/LOC115706782/LOC115705236/LOC115708179/LOC115705537/LOC115706751/LOC115706208/LOC115707541/LOC115706094/LOC115707168/LOC115707878/LOC115707270/LOC115707586/LOC115707757/LOC115711464/LOC115708829/LOC115711640/LOC115710249/LOC115708844/LOC115711248/LOC115714649/LOC115714695/LOC115712258/LOC115712154/LOC115712420/LOC115717369/LOC115715590/LOC115716847/LOC115716…	58
803	H3K56ac	GO:0009142	nucleoside triphosphate biosynthetic process	33/8108	47/15562	0.00883954	0.0486502	0.0363231	LOC115704957/LOC115705607/LOC115708064/LOC115709698/LOC115710101/LOC115702325/LOC115702361/LOC115707664/LOC115705524/LOC115705183/LOC115708106/LOC115707173/LOC115707115/LOC115707116/LOC115705347/LOC115707949/LOC115709744/LOC115709134/LOC115709278/LOC115713924/LOC115714371/LOC115714255/LOC115716105/LOC115716183/LOC115725156/LOC115695925/LOC115725475/LOC115697327/LOC115697591/LOC115697841/LOC115699…	33
804	H3K56ac	GO:0033108	mitochondrial respiratory chain complex assembly	25/8108	34/15562	0.00887963	0.0487505	0.036398	LOC115698387/LOC115707193/LOC115708556/LOC115706283/LOC115706957/LOC115708333/LOC115708912/LOC115711521/LOC115708879/LOC115714140/LOC115712573/LOC115714201/LOC115714033/LOC115717486/LOC115716290/LOC115716410/LOC115717866/LOC115720973/LOC115720642/LOC115719039/LOC115722841/LOC115724095/LOC115725601/LOC115697050/LOC115698514	25
805	H3K27me3	GO:0016114	terpenoid biosynthetic process	57/2006	127/15562	5.79e-19	1e-15	8.92e-16	LOC115723648/LOC115703738/LOC115705408/LOC115694716/LOC115707304/LOC115704454/LOC115704439/LOC115707431/LOC115704748/LOC115710837/LOC115712980/LOC115715193/LOC115715130/LOC115714319/LOC115714530/LOC115714620/LOC115712335/LOC115715915/LOC115715811/LOC115716805/LOC115716604/LOC115716605/LOC115717219/LOC115715884/LOC115716064/LOC115716895/LOC115715825/LOC115716395/LOC115720796/LOC115720809/LOC115718…	57
806	H3K27me3	GO:0006721	terpenoid metabolic process	60/2006	145/15562	8.8e-18	7.64e-15	6.78e-15	LOC115723648/LOC115703738/LOC115705408/LOC115694716/LOC115707304/LOC115704454/LOC115704439/LOC115707431/LOC115704748/LOC115710837/LOC115712980/LOC115715193/LOC115715130/LOC115714319/LOC115714530/LOC115714620/LOC115712335/LOC115715915/LOC115715811/LOC115716805/LOC115716604/LOC115716605/LOC115717219/LOC115715884/LOC115716064/LOC115716895/LOC115715825/LOC115716395/LOC115720796/LOC115720809/LOC115718…	60
807	H3K27me3	GO:0009699	phenylpropanoid biosynthetic process	45/2006	104/15562	1.54e-14	7.36e-12	6.54e-12	LOC115705062/LOC115710001/LOC115710554/LOC115700961/LOC115701174/LOC115703600/LOC115708343/LOC115707961/LOC115710187/LOC115709282/LOC115708687/LOC115712607/LOC115712649/LOC115712861/LOC115716541/LOC115716544/LOC115716016/LOC115716993/LOC115716578/LOC115715996/LOC115715995/LOC115715730/LOC115715673/LOC115715642/LOC115716906/LOC115716167/LOC115720811/LOC115718850/LOC115718683/LOC115720620/LOC115720…	45
808	H3K27me3	GO:0008299	isoprenoid biosynthetic process	59/2006	162/15562	1.7e-14	7.36e-12	6.54e-12	LOC115723648/LOC115700182/LOC115703738/LOC115705408/LOC115694716/LOC115707304/LOC115704454/LOC115704439/LOC115707431/LOC115707439/LOC115704748/LOC115710837/LOC115712980/LOC115715193/LOC115715130/LOC115714319/LOC115714530/LOC115714620/LOC115712335/LOC115715915/LOC115715811/LOC115716805/LOC115716604/LOC115716605/LOC115717219/LOC115715884/LOC115716064/LOC115716895/LOC115715825/LOC115716395/LOC115720…	59
809	H3K27me3	GO:0009698	phenylpropanoid metabolic process	52/2006	136/15562	6.36e-14	2.21e-11	1.96e-11	LOC115705062/LOC115710001/LOC115710554/LOC115700961/LOC115701174/LOC115703600/LOC115708343/LOC115707961/LOC115710187/LOC115709282/LOC115708687/LOC115712607/LOC115712649/LOC115712861/LOC115716541/LOC115716544/LOC115716016/LOC115716993/LOC115716578/LOC115715996/LOC115715995/LOC115715730/LOC115715673/LOC115715642/LOC115716906/LOC115716167/LOC115720811/LOC115718850/LOC115718683/LOC115720620/LOC115720…	52
810	H3K27me3	GO:0006720	isoprenoid metabolic process	63/2006	190/15562	3.23e-13	9.33e-11	8.29e-11	LOC115723648/LOC115700182/LOC115703738/LOC115705408/LOC115702509/LOC115694716/LOC115707304/LOC115704454/LOC115704439/LOC115707431/LOC115707439/LOC115704748/LOC115710837/LOC115712980/LOC115715193/LOC115715130/LOC115714319/LOC115714530/LOC115714620/LOC115712335/LOC115715915/LOC115715811/LOC115716805/LOC115716604/LOC115716605/LOC115717219/LOC115715884/LOC115716064/LOC115716895/LOC115715825/LOC115716…	63
811	H3K27me3	GO:0019748	secondary metabolic process	66/2006	213/15562	3.02e-12	7.06e-10	6.27e-10	LOC115723648/LOC115705062/LOC115709401/LOC115709427/LOC115710001/LOC115710554/LOC115700881/LOC115700961/LOC115701174/LOC115703600/LOC115705786/LOC115708343/LOC115707961/LOC115709263/LOC115710187/LOC115709282/LOC115708687/LOC115712607/LOC115712649/LOC115715124/LOC115712861/LOC115716771/LOC115716541/LOC115716544/LOC115716016/LOC115716993/LOC115716578/LOC115715996/LOC115715995/LOC115715984/LOC115715…	66
812	H3K27me3	GO:0044550	secondary metabolite biosynthetic process	49/2006	135/15562	3.26e-12	7.06e-10	6.27e-10	LOC115723648/LOC115705062/LOC115710001/LOC115710554/LOC115700961/LOC115701174/LOC115703600/LOC115708343/LOC115707961/LOC115710187/LOC115709282/LOC115708687/LOC115712607/LOC115712649/LOC115715124/LOC115712861/LOC115716771/LOC115716541/LOC115716544/LOC115716016/LOC115716993/LOC115716578/LOC115715996/LOC115715995/LOC115715730/LOC115715673/LOC115715642/LOC115716906/LOC115716167/LOC115720811/LOC115718…	49
813	H3K27me3	GO:0042743	hydrogen peroxide metabolic process	47/2006	140/15562	2.01e-10	3.87e-08	3.44e-08	LOC115707258/LOC115706102/LOC115713783/LOC115695001/LOC115696683/LOC115703943/LOC115708062/LOC115707504/LOC115707503/LOC115707505/LOC115715124/LOC115714377/LOC115717838/LOC115715638/LOC115716306/LOC115719602/LOC115720664/LOC115723536/LOC115721742/LOC115724069/LOC115722149/LOC115723538/LOC115723455/LOC115723092/LOC115723064/LOC115722136/LOC115723219/LOC115723328/LOC115722259/LOC115724058/LOC115724…	47
814	H3K27me3	GO:0042744	hydrogen peroxide catabolic process	43/2006	126/15562	6.55e-10	1.14e-07	1.01e-07	LOC115707258/LOC115706102/LOC115713783/LOC115696683/LOC115703943/LOC115708062/LOC115707504/LOC115707503/LOC115707505/LOC115714377/LOC115715638/LOC115719602/LOC115720664/LOC115723536/LOC115721742/LOC115724069/LOC115722149/LOC115723538/LOC115723455/LOC115723092/LOC115723064/LOC115722136/LOC115723219/LOC115723328/LOC115722259/LOC115724058/LOC115724017/LOC115724059/LOC115725721/LOC115724759/LOC115725…	43
815	H3K27me3	GO:0009808	lignin metabolic process	32/2006	80/15562	1.09e-09	1.72e-07	1.53e-07	LOC115705062/LOC115710554/LOC115701174/LOC115707961/LOC115708687/LOC115712649/LOC115712861/LOC115716541/LOC115716544/LOC115716016/LOC115716993/LOC115715673/LOC115715642/LOC115716906/LOC115720632/LOC115721202/LOC115720940/LOC115719602/LOC115721930/LOC115723302/LOC115725719/LOC115695726/LOC115695727/LOC115694734/LOC115695248/LOC115695670/LOC115725319/LOC115698241/LOC115697385/LOC115696869/LOC115696…	32
[truncated: 150 more rows]

## Sheet: GO_MF_Trichome_Histone_genes
	Cluster	ID	Description	GeneRatio	BgRatio	pvalue	p.adjust	qvalue	geneID	Count
[truncated: 365 more rows]

## Sheet: GO_CC_Trichome_Histone_genes
	Cluster	ID	Description	GeneRatio	BgRatio	pvalue	p.adjust	qvalue	geneID	Count
[truncated: 281 more rows]
